# Supplementary material for: Modeling the formation of TiO2 ultra-small nanoparticles
Source: Royal Society of Chemistry journal article supplement (doi:10.1039/c7nr01749a), 2017-01-01
Supplement: c7nr01749a1.pdf [file c7nr01749a1.pdf]

## Supplementary Information:

### Modeling the Formation of TiO<sub>2</sub> Ultra-Small Nanoparticles

Mingyang Chen<sup>a,\*</sup> and David A. Dixon<sup>b,\*</sup>

<sup>a</sup> Beijing Computational Science Research Center, Beijing, China

<sup>b</sup> Department of Chemistry, The University of Alabama, Tuscaloosa, AL 35487-0336, USA

### Supporting Information

Complete references for 26 and 27.

**Ref. 26** Frisch, M. J.; Trucks, G. W.; Schlegel, H. B.; Scuseria, G. E.; Robb, M. A.; Cheeseman, J. R.; Scalmani, G.; Barone, V.; Mennucci, B.; Petersson, G. A.; Nakatsuji, H.; Caricato, M.; Li, X.; Hratchian, H. P.; Izmaylov, A. F.; Bloino, J.; Zheng, G.; Sonnenberg, J. L.; Hada, M.; Ehara, M.; Toyota, K.; Fukuda, R.; Hasegawa, J.; Ishida, M.; Nakajima, T.; Honda, Y.; Kitao, O.; Nakai, H.; Vreven, T.; Montgomery, Jr., J. A.; Peralta, J. E.; Ogliaro, F.; Bearpark, M.; Heyd, J. J.; Brothers, E.; Kudin, K. N.; Staroverov, V. N.; Kobayashi, R.; Normand, J.; Raghavachari, K.; Rendell, A.; Burant, J. C.; Iyengar, S. S.; Tomasi, J.; Cossi, M.; Rega, N.; Millam, N. J.; Klene, M.; Knox, J. E.; Cross, J. B.; Bakken, V.; Adamo, C.; Jaramillo, J.; Gomperts, R.; Stratmann, R. E.; Yazyev, O.; Austin, A. J.; Cammi, R.; Pomelli, C.; Ochterski, J. W.; Martin, R. L.; Morokuma, K.; Zakrzewski, V. G.; Voth, G. A.; Salvador, P.; Dannenberg, J. J.; Dapprich, S.; Daniels, A. D.; Farkas, Ö.; Foresman, J. B.; Ortiz, J. V.; Cioslowski, J.; Fox, D. J. Gaussian, Inc., Wallingford CT, 2009.

**Ref 27.** Valiev, M.; Bylaska, E. J.; Govind, N.; Kowalski, K.; Straatsma, T. P.; van Dam, H. J. J.; Wang, D.; Nieplocha, J.; Apra, E.; Windus, T. L.; de Jong, W. A. NWChem: a Comprehensive and Scalable Open-source Solution for Large Scale Molecular Simulations. *Comput. Phys. Commun.*, **2010**, *181*, 1477-1489.

(a)

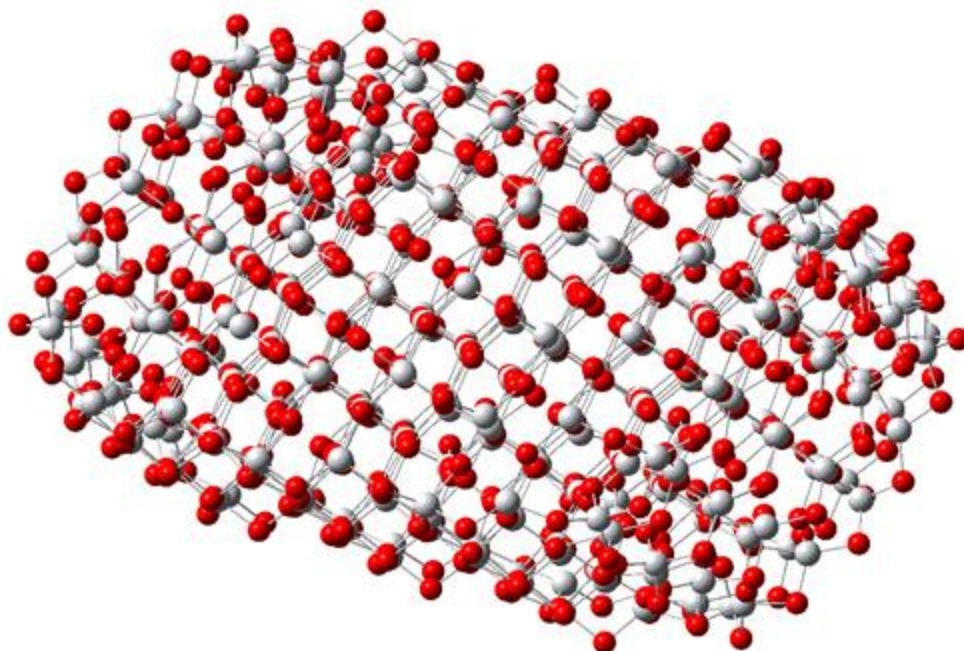

(b)

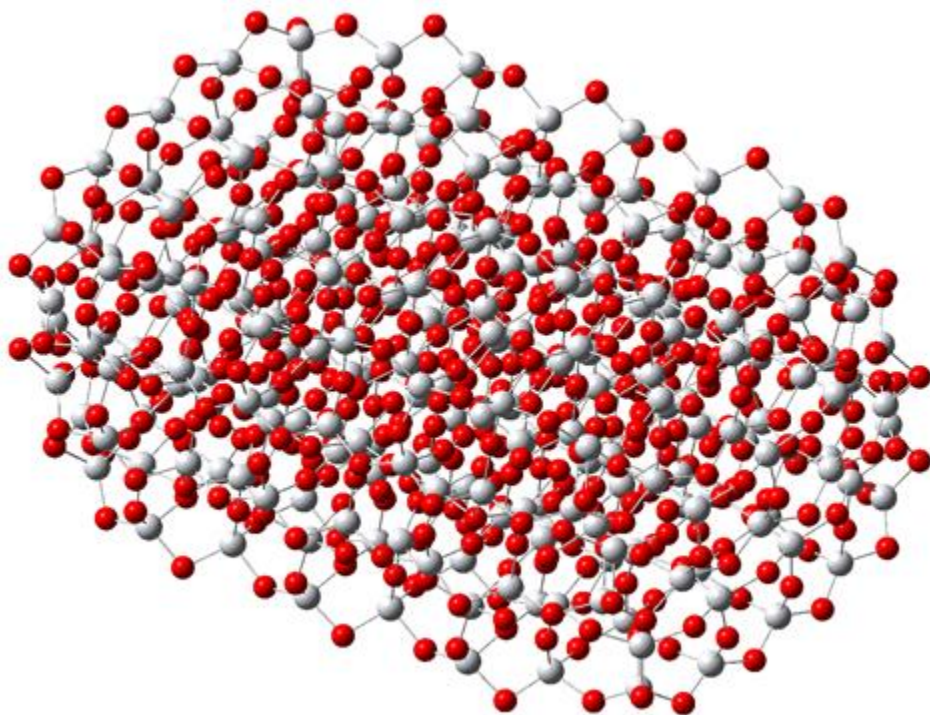

**Figure S1.** (a) anatase-like  $(\text{TiO}_2)_{240}$  and (b) **48c**-like  $(\text{TiO}_2)_{240}$  optimized at the PM6 level.

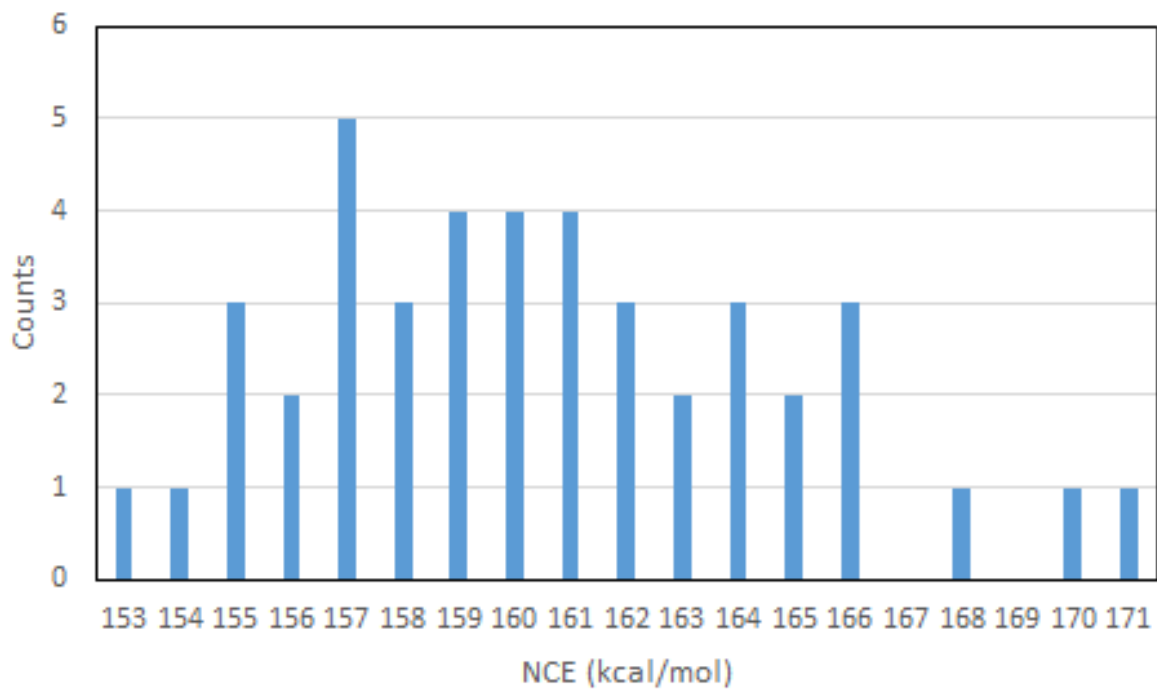

**Figure S2.** Distribution of the calculated NCEs using anatase-like 3-D USNPs with  $l_x, l_y, l_z \geq 1$ .

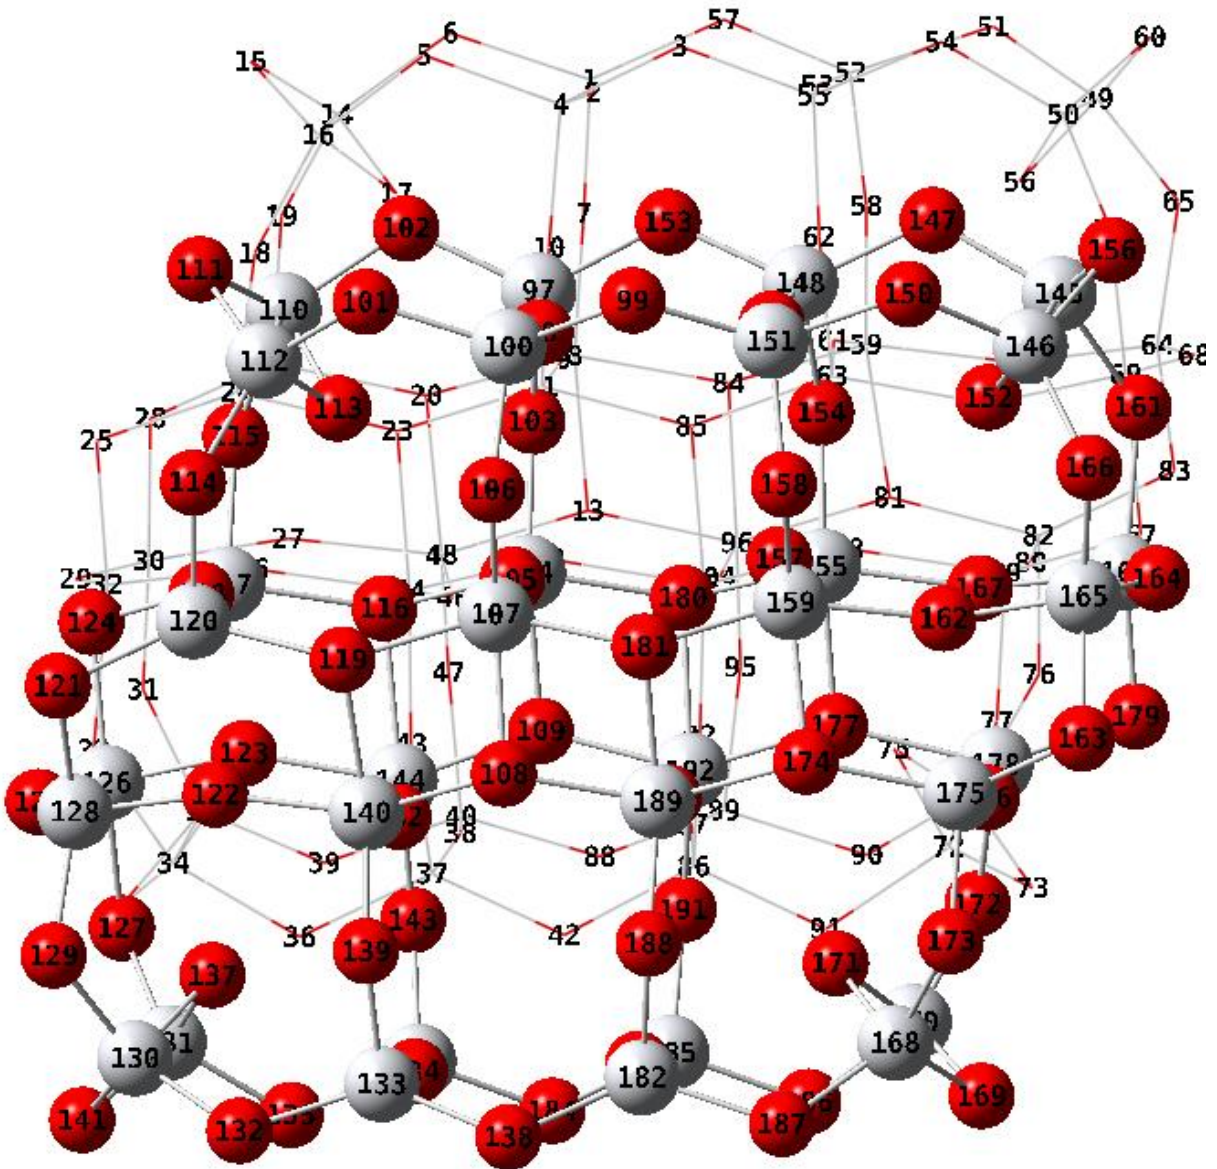

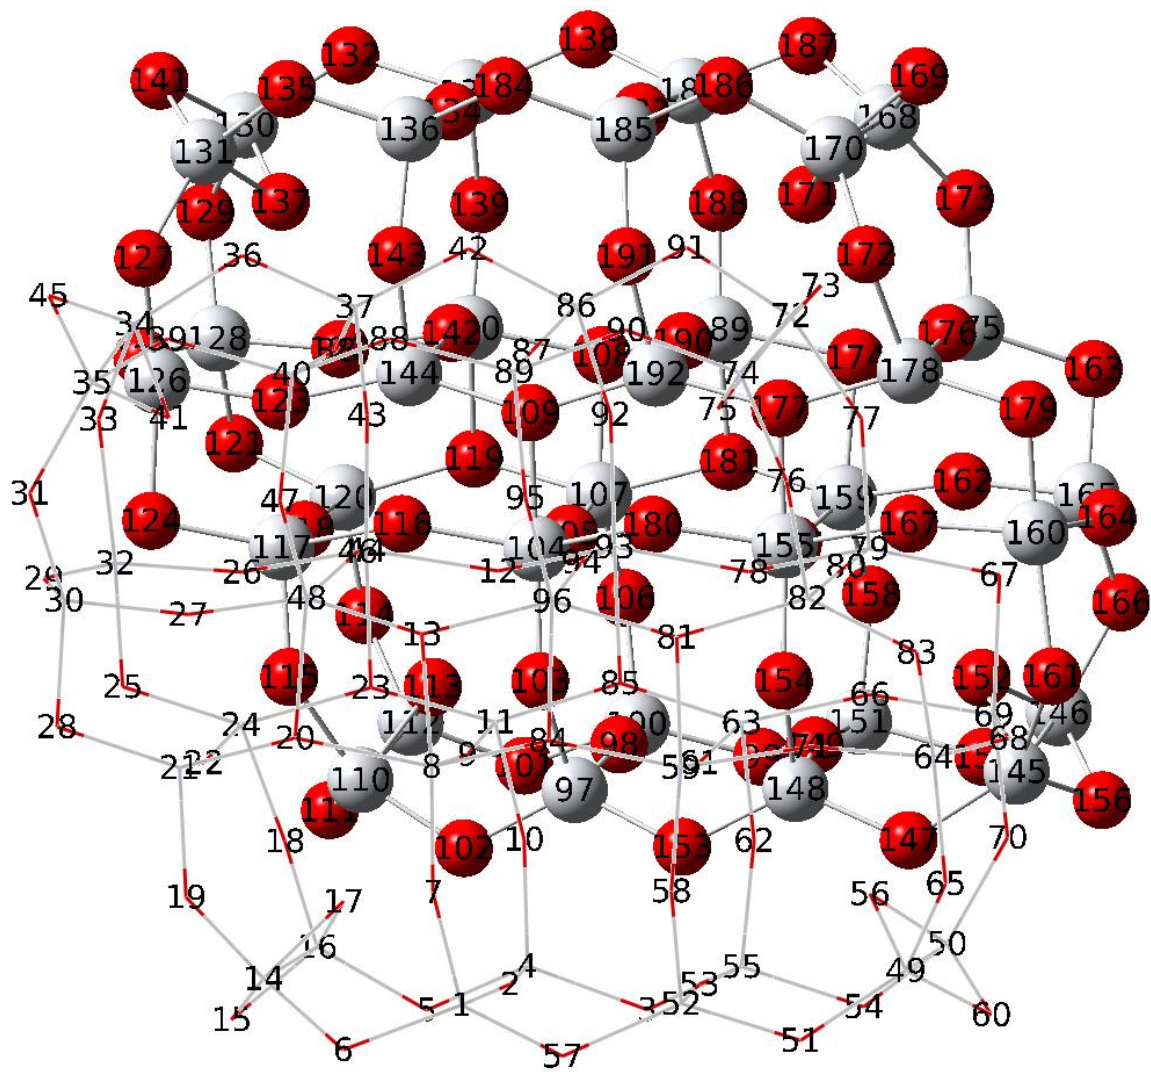

Figure S3.  $(\text{TiO}_2)_{64}$  (**64a**) with atom indices.

**Table S1.** Calculated NCEs for the structure **48c**-like 3-D USNPs (in kcal/mol, compared with **48b**-like 3-D USNPs) at the PM6 level

| label   | n   | NCE              |                                 |
|---------|-----|------------------|---------------------------------|
|         |     | <b>48c</b> -like | <b>48b</b> -like (anatase-like) |
| (0,0,0) | 48  | 127.9            | 127.0                           |
| (0,0,1) | 72  | 129.5            | 128.8                           |
| (0,0,2) | 96  | 130.5            | 129.6                           |
| (0,0,3) | 120 | 131.1            | 130.1                           |
| (0,0,4) | 144 | 131.6            | 130.5                           |
| (1,0,0) | 64  | 129.9            | 129.3                           |
| (1,0,1) | 96  | 132.0            | 131.1                           |
| (1,0,2) | 128 | 132.9            | 132.1                           |
| (1,0,3) | 160 | 133.5            | 132.8                           |
| (1,0,4) | 192 | 134.1            | 133.3                           |
| (1,1,0) | 96  | 132.1            | 132.0                           |
| (1,1,1) | 144 | 134.1            | 133.9                           |
| (1,1,2) | 192 | 135.5            | 135.2                           |
| (1,1,3) | 240 | 136.3            | 136.0                           |
| (1,1,4) | 288 | 137.4            | 136.7                           |
| (2,1,0) | 120 | 133.5            | 133.5                           |
| (2,1,1) | 180 | 136.0            | 135.6                           |
| (2,1,2) | 240 | 137.4            | 136.8                           |
| (2,1,3) | 300 | 138.3            | 137.7                           |
| (2,1,4) | 360 | 138.9            | 138.5                           |
| (1,2,0) | 128 | 133.2            | 133.3                           |
| (1,2,1) | 192 | 135.5            | 135.5                           |
| (1,2,2) | 256 | 136.8            | 136.9                           |
| (1,2,3) | 320 | 138.4            | 138.0                           |
| (2,2,0) | 160 | 134.8            | 134.9                           |
| (2,2,1) | 240 | 137.3            | 137.3                           |

**Table S2.** Solutions to the Linear System of Equations Consisting of the (1,1,2), (1,1,3), (2,1,2), (2,1,3), (1,2,0), (1,2,1), (2,2,0), and (2,2,1) –mers for the **48c**-Like 3D USNP Series.

|                                                             | m (total) | $\langle \Delta E \rangle$<br>kcal/mol | $\Delta E$<br>kcal/mol | factor <sup>[a]</sup> |
|-------------------------------------------------------------|-----------|----------------------------------------|------------------------|-----------------------|
| Corner-1 + Corner-2<br>+ Corner-3 + Corner-4 <sup>[b]</sup> | 24        | 29.3                                   | 702.8                  | 2                     |
| Edge-x1 + Edge-x2 <sup>[b]</sup>                            | 8         | 17.4                                   | 139.3                  | 2                     |
| Edge-y1 + Edge-y2 <sup>[b]</sup>                            | 12        | 18.3                                   | 219.5                  | 2                     |
| Edge-z1 + Edge-z2 <sup>[b]</sup>                            | 12        | 19.0                                   | 227.8                  | 2                     |
| Face-x                                                      | 6         | 17.3                                   | 103.6                  | 2                     |
| Face-y                                                      | 4         | 6.3                                    | 25.0                   | 2                     |
| Face-z                                                      | 4         | 9.3                                    | 37.2                   | 2                     |
| Bulk                                                        | 4         |                                        |                        | 1                     |

<sup>a]</sup> Prefactors in Eqs. (25a) to (25d) related to the point group symmetry, from which we have the total monomer counts  $N_{\text{Frag}} = m * \text{factor} * f(l_x, l_y, l_z)$ . For example, the Face-x fragments always appear as pairs due to the symmetry caused by the center of inversion, and therefore the factor is 2.

<sup>[b]</sup> The total energies for the four types of Corner fragments cannot be solved separately. Similarly, the total energies for the two types of Edge fragments in each direction (that is represented by a translational vector) cannot be solved separately.

**Table S3.** Calculated HOMO, LUMO Energy Level and HOMO-LUMO Gap ( $E_g$ ) in eV for  $(\text{TiO}_2)_n$ .

|            | HOMO  | LUMO  | $E_g$ |
|------------|-------|-------|-------|
| <b>1a</b>  | -7.17 | -3.36 | 3.81  |
| <b>2a</b>  | -8.20 | -3.34 | 4.86  |
| <b>3a</b>  | -8.06 | -4.46 | 3.60  |
| <b>4a</b>  | -8.82 | -3.98 | 4.85  |
| <b>5a</b>  | -8.95 | -4.28 | 4.67  |
| <b>5b</b>  | -8.69 | -4.07 | 4.62  |
| <b>6a</b>  | -8.86 | -4.36 | 4.49  |
| <b>7a</b>  | -8.94 | -4.18 | 4.76  |
| <b>8a</b>  | -8.78 | -4.13 | 4.65  |
| <b>8b</b>  | -8.87 | -4.12 | 4.75  |
| <b>9a</b>  | -8.83 | -4.32 | 4.51  |
| <b>10a</b> | -8.75 | -4.42 | 4.32  |
| <b>10b</b> | -8.85 | -3.54 | 5.31  |
| <b>11a</b> | -8.71 | -4.28 | 4.43  |
| <b>12a</b> | -8.90 | -4.37 | 4.53  |
| <b>12b</b> | -8.64 | -3.77 | 4.87  |
| <b>12c</b> | -8.22 | -3.67 | 4.55  |
| <b>12d</b> | -8.09 | -4.42 | 3.67  |
| <b>13a</b> | -8.66 | -4.39 | 4.27  |
| <b>13b</b> | -8.48 | -3.99 | 4.49  |
| <b>14a</b> | -8.63 | -4.48 | 4.15  |
| <b>14b</b> | -8.48 | -4.19 | 4.29  |
| <b>15a</b> | -8.94 | -4.41 | 4.53  |
| <b>16a</b> | -8.63 | -4.34 | 4.29  |
| <b>16b</b> | -8.57 | -3.86 | 4.71  |
| <b>17a</b> | -8.64 | -4.39 | 4.24  |
| <b>18a</b> | -8.51 | -4.70 | 3.82  |
| <b>18b</b> | -8.91 | -4.36 | 4.55  |
| <b>18c</b> | -8.55 | -3.87 | 4.68  |
| <b>19a</b> | -8.55 | -4.61 | 3.94  |
| <b>20a</b> | -8.59 | -4.32 | 4.28  |
| <b>20b</b> | -8.76 | -4.74 | 4.02  |
| <b>24a</b> | -8.58 | -4.31 | 4.27  |
| <b>24b</b> | -8.64 | -3.99 | 4.65  |
| <b>24c</b> | -8.64 | -4.37 | 4.27  |
| <b>28a</b> | -8.57 | -4.31 | 4.26  |
| <b>28b</b> | -8.69 | -3.94 | 4.74  |
| <b>30a</b> | -8.60 | -3.92 | 4.68  |



|            |       |       |      |
|------------|-------|-------|------|
| <b>30b</b> | -8.54 | -4.48 | 4.06 |
| <b>30c</b> | -8.70 | -4.24 | 4.45 |
| <b>32a</b> | -8.56 | -4.30 | 4.27 |
| <b>32b</b> | -8.68 | -4.09 | 4.59 |
| <b>32c</b> | -8.75 | -4.68 | 4.07 |
| <b>36a</b> | -8.56 | -4.29 | 4.27 |
| <b>36b</b> | -8.73 | -4.17 | 4.56 |
| <b>36c</b> | -8.50 | -4.64 | 3.86 |
| <b>40a</b> | -8.69 | -4.11 | 4.57 |
| <b>40b</b> | -8.56 | -4.29 | 4.27 |
| <b>40c</b> | -8.49 | -4.52 | 3.97 |
| <b>48a</b> | -8.68 | -4.24 | 4.44 |
| <b>48b</b> | -8.49 | -4.20 | 4.29 |
| <b>48c</b> | -8.58 | -4.32 | 4.26 |
| <b>60a</b> | -8.71 | -4.28 | 4.44 |
| <b>64a</b> | -8.49 | -4.13 | 4.36 |
| <b>64b</b> | -8.72 | -4.32 | 4.39 |
| <b>80a</b> | -8.73 | -4.37 | 4.36 |

**Table S4.** Threshold Fermi levels for the atomic charge transfer for (TiO<sub>2</sub>)<sub>64</sub>.

| DOS threshold = 0.1 (0.2 e <sup>-</sup> ) |                                                              |       |                                                     |
|-------------------------------------------|--------------------------------------------------------------|-------|-----------------------------------------------------|
| E /eV                                     | Atom (O) ID                                                  | E /eV | Atom (Ti) ID                                        |
| -8.45                                     | 163, 164, 176, 179, 22, 25, 28, 29                           | -4.19 | 104, 93                                             |
| -8.52                                     | 115, 77                                                      | -4.16 | 107, 117, 155, 44, 79, 96                           |
| -8.54                                     | 153, 42                                                      | -4.14 | 11, 120, 140, 144, 159, 189, 192, 48, 59, 63, 8, 82 |
| -8.56                                     | 149, 38, 87, 88, 98, 99                                      | -4.12 | 126, 128, 160, 32, 64, 69                           |
| -8.59                                     | 113, 162, 166, 27, 31, 75                                    | -4.03 | 110, 178, 24, 72                                    |
| -8.61                                     | 109, 85                                                      | -4.01 | 86, 97                                              |
| -8.63                                     | 142, 61                                                      | -3.99 | 175, 21                                             |
| -8.65                                     | 108, 143, 62, 84                                             | -3.97 | 136, 148, 185, 37, 4, 55                            |
| -8.67                                     | 106, 121, 122, 147, 152, 158, 190, 36, 41, 47, 71, 83, 9, 95 | -3.94 | 131, 50                                             |
| -8.70                                     | 10, 150, 191, 39                                             | -3.92 | 1, 100, 130, 133, 165, 182, 30, 49, 52              |
| -8.72                                     | 101, 102, 111, 125, 174, 177, 20, 23, 68, 73, 90, 91         | -3.90 | 16, 170, 89                                         |
| -8.74                                     | 103, 105, 124, 127, 156, 161, 33, 45, 67, 70, 92, 94         | -3.88 | 14, 145, 168, 34, 74                                |
| -8.76                                     | 114, 76                                                      | -3.86 | 112                                                 |
| -8.78                                     | 118, 13, 154, 157, 181, 43, 46, 80                           | -3.83 | 151, 40                                             |
| -8.81                                     | 12, 138, 139, 180, 183, 188, 2, 57, 58, 7                    | -3.77 | 146, 35                                             |
| -8.83                                     | 123, 17, 171, 173, 184, 187, 19, 3, 6, 66                    |       |                                                     |
| -8.85                                     | 129, 132, 134, 15, 169, 51, 53, 65                           |       |                                                     |
| -8.87                                     | 119, 141, 186, 5, 60, 81                                     |       |                                                     |
| -8.89                                     | 135, 172, 18, 54                                             |       |                                                     |
| -8.94                                     | 137, 56                                                      |       |                                                     |
| -8.96                                     | 116, 78                                                      |       |                                                     |
| -9.00                                     | 167, 26                                                      |       |                                                     |
| DOS threshold = 0.5 (1 e <sup>-</sup> )   |                                                              |       |                                                     |
| E /eV                                     | Atom (O) ID                                                  | E /eV | Atom (Ti) ID                                        |
| -8.50                                     | 179, 25                                                      | -4.10 | 104, 93                                             |
| -8.52                                     | 163, 164, 176, 22, 28, 29                                    | -4.03 | 11, 155, 192, 44, 79                                |
| -8.59                                     | 42                                                           | -4.01 | 107, 117, 144, 63, 96                               |
| -8.61                                     | 153                                                          | -3.97 | 189, 8                                              |
| -8.65                                     | 87, 88, 98, 99                                               | -3.94 | 140, 59                                             |

|       |                                                               |       |                           |
|-------|---------------------------------------------------------------|-------|---------------------------|
| -8.67 | 149, 38                                                       | -3.92 | 160, 32                   |
| -8.72 | 109, 142, 61, 85                                              | -3.90 | 120, 126, 159, 48, 69, 82 |
| -8.74 | 147, 36                                                       | -3.88 | 178, 24                   |
| -8.76 | 108, 150, 152, 39, 41, 84                                     | -3.86 | 131, 50                   |
| -8.78 | 113, 121, 75, 83                                              | -3.83 | 128, 130, 49, 64          |
| -8.81 | 101, 102, 166, 31, 90, 91                                     | -3.81 | 136, 175, 21, 55          |
| -8.83 | 122, 156, 190, 23, 45, 71, 9                                  | -3.79 | 185, 4                    |
| -8.85 | 177                                                           | -3.77 | 16,170                    |
| -8.87 | 111, 158, 162, 27, 47, 73                                     | -3.75 | 110, 133, 14, 168, 52, 72 |
| -8.92 | 106, 125, 138, 183, 2, 57, 68, 95                             | -3.72 | 1, 148, 182, 37, 86, 97   |
| -8.94 | 6                                                             | -3.70 | 145, 34                   |
| -8.96 | 114, 124, 139, 187, 58, 67, 76                                | -3.68 | 112, 74                   |
| -8.98 | 13, 132, 134, 157, 161, 173, 174, 181, 19, 20, 33, 46, 51, 53 | -3.66 | 165, 30                   |
| -9.00 | 188, 7                                                        | -3.64 | 100, 151, 35, 40, 89      |
| -9.03 | 115, 77                                                       | -3.61 | 146                       |
| -9.05 | 118, 129, 15, 169, 65, 80                                     |       |                           |
| -9.07 | 141, 17, 171, 184, 3, 60                                      |       |                           |
| -9.11 | 10, 119, 127, 191, 70, 81                                     |       |                           |
| -9.14 | 186, 5                                                        |       |                           |
| -9.16 | 143, 62                                                       |       |                           |
| -9.18 | 103, 123, 135, 137, 172, 18, 54, 56, 66, 92                   |       |                           |
| -9.2  | 105, 154, 43, 94                                              |       |                           |
| -9.22 | 12,180                                                        |       |                           |
| -9.29 | 116, 78                                                       |       |                           |
| -9.31 | 167, 26                                                       |       |                           |

**Table S5. Cartesian Coordinates for the Optimized (TiO<sub>2</sub>)<sub>n</sub> Clusters and USNPs, n ≤ 80, at the B3LYP/DZVP2 Level.**

1a  
 E = -999.890386 Hartree  
 Ti 0.000000 0.000000 0.392930  
 O 0.000000 1.364134 -0.540279  
 O 0.000000 -1.364134 -0.540279

2a  
 E = -1999.963252 Hartree  
 Ti 1.293759 -0.000493 -0.424695  
 O 2.585546 0.000474 0.582784  
 O 0.000141 1.259979 0.001020  
 Ti -1.294838 0.000699 0.425079  
 O -2.582622 -0.001052 -0.587699  
 O -0.000098 -1.259970 0.002836

3a  
 E = -3000.037254 Hartree  
 O -1.414181 1.319741 -0.672828  
 Ti -1.440660 -0.619403 -0.101606  
 O -2.774742 -1.392185 0.438532  
 O -0.000369 -1.589292 -0.781573  
 Ti 0.000929 1.788677 0.229473  
 O 1.422292 1.321661 -0.663895  
 Ti 1.439743 -0.620551 -0.102077  
 O -0.002129 0.231569 1.170869  
 O 2.769095 -1.400483 0.437974

4a  
 E = -4000.116788 Hartree  
 Ti 2.045782 -0.000031 0.626503  
 O 2.855986 -0.000300 2.034856  
 O 1.686598 -1.693630 -0.290418  
 O 1.686486 1.693808 -0.290058  
 O -0.000067 -0.000050 0.535188  
 Ti -0.000025 -1.421288 -0.879610  
 Ti -0.000110 1.421512 -0.879283  
 Ti -2.045788 -0.000110 0.626602  
 O 0.000013 0.000240 -2.053443  
 O -1.686758 1.693679 -0.290106  
 O -1.686640 -1.693689 -0.290497  
 O -2.855230 -0.000287 2.035395

5a  
 E = -5000.191792 Hartree  
 O -0.000814 2.718474 0.417631  
 O 0.003254 0.586146 -1.003075  
 Ti -1.389336 1.513647 0.020774  
 O -2.921388 1.068145 -0.780801

|    |           |           |           |
|----|-----------|-----------|-----------|
| Ti | -2.955851 | -0.763843 | -0.043532 |
| O  | -1.464260 | 0.049622  | 1.088793  |
| O  | -4.269875 | -1.330827 | 0.730754  |
| O  | -1.494850 | -1.937828 | -0.593994 |
| O  | 1.494692  | -1.935335 | -0.603961 |
| Ti | 2.954723  | -0.764543 | -0.049389 |
| O  | 1.464092  | 0.041685  | 1.090339  |
| O  | 4.263445  | -1.337185 | 0.729476  |
| O  | 2.921639  | 1.075003  | -0.772213 |
| Ti | 1.391235  | 1.514633  | 0.033598  |
| Ti | 0.000708  | -1.135494 | -0.071613 |

5b

E = -5000.191502 Hartree

|    |           |           |           |
|----|-----------|-----------|-----------|
| Ti | -0.242970 | 1.931565  | -0.154045 |
| O  | -0.044285 | 1.801682  | 1.709670  |
| O  | 2.066705  | -0.002042 | 1.250316  |
| Ti | 2.256951  | 0.000045  | -0.730589 |
| O  | 1.248000  | 1.653798  | -1.062518 |
| O  | 3.787682  | 0.002628  | -1.274146 |
| O  | 1.244039  | -1.651406 | -1.066811 |
| Ti | 0.453745  | -0.004628 | 1.873842  |
| O  | -0.046676 | -1.811063 | 1.701057  |
| O  | -0.517374 | -0.000284 | 0.137255  |
| Ti | -2.410510 | 0.004053  | -0.708539 |
| O  | -1.806248 | -1.808196 | -1.056228 |
| O  | -3.609927 | 0.005519  | 0.386682  |
| O  | -1.797350 | 1.814555  | -1.055081 |
| Ti | -0.247968 | -1.932922 | -0.160741 |

6a

E = -6000.304734 Hartree

|    |           |           |           |
|----|-----------|-----------|-----------|
| O  | -1.443480 | -1.226788 | -1.849241 |
| Ti | 0.226803  | -0.647705 | -1.783460 |
| O  | 1.538343  | -1.610484 | -1.122807 |
| O  | 0.865833  | 1.031790  | -2.335869 |
| O  | -4.112748 | -1.604707 | -0.485946 |
| Ti | -2.639052 | -0.935095 | -0.351687 |
| O  | 2.632126  | 1.048025  | 0.032013  |
| Ti | 2.642960  | -0.926399 | 0.363000  |
| O  | 4.118838  | -1.590688 | 0.499628  |
| O  | -2.635787 | 1.043246  | -0.044317 |
| Ti | 1.255737  | 1.801945  | -0.743004 |
| O  | -0.002359 | 0.374705  | -0.002694 |
| Ti | -0.223529 | -0.625040 | 1.786867  |
| O  | -0.869235 | 1.057047  | 2.324283  |
| Ti | -1.263430 | 1.810492  | 0.724822  |
| O  | -0.003921 | 2.958365  | -0.015308 |
| O  | -1.535738 | -1.599361 | 1.144086  |
| O  | 1.449531  | -1.196195 | 1.865697  |

7a

E = -7000.387747 Hartree

|    |           |           |           |
|----|-----------|-----------|-----------|
| Ti | 3.745853  | 0.000088  | -0.030808 |
| O  | 3.197045  | -1.830309 | 0.515007  |
| O  | 4.674142  | 0.000312  | -1.358904 |
| Ti | -0.602115 | -0.000272 | 1.851311  |
| O  | 0.481976  | -1.482939 | 1.847960  |
| Ti | 1.435771  | 1.727796  | 0.288112  |
| O  | 0.481941  | 1.482402  | 1.848409  |
| O  | 3.196825  | 1.830285  | 0.515442  |
| O  | 0.264707  | 2.465985  | -0.961063 |
| O  | 1.782612  | 0.000020  | -0.443155 |
| Ti | 1.435972  | -1.727960 | 0.287724  |
| O  | -0.759313 | 0.000093  | -0.083522 |
| Ti | -3.405297 | -0.000113 | 0.413397  |
| O  | -2.346392 | -0.000322 | 2.082065  |
| O  | -2.794520 | -1.585270 | -0.646735 |
| O  | -5.004543 | -0.000255 | 0.673714  |
| O  | -2.794692 | 1.585379  | -0.646329 |
| Ti | -1.207932 | -1.419417 | -1.373056 |
| Ti | -1.208103 | 1.419850  | -1.372727 |
| O  | -1.178591 | 0.000360  | -2.557031 |
| O  | 0.264891  | -2.465663 | -0.961729 |

8a

E = -8000.481795 Hartree

|    |           |           |           |
|----|-----------|-----------|-----------|
| O  | 0.360125  | -1.149280 | -0.000012 |
| O  | -2.627841 | 0.949699  | -1.521620 |
| Ti | -3.260594 | -0.124461 | 0.000017  |
| O  | -4.871172 | -0.328558 | 0.000035  |
| O  | -0.360119 | 1.149278  | 0.000014  |
| Ti | -0.943609 | 1.352106  | -1.814331 |
| Ti | -0.943549 | 1.351955  | 1.814388  |
| O  | -0.057845 | 2.990570  | -1.642170 |
| O  | -2.627792 | 0.949550  | 1.521740  |
| O  | -0.057831 | 2.990454  | 1.642323  |
| Ti | 0.769472  | 2.720077  | 0.000065  |
| O  | 2.308446  | 1.860575  | 0.000040  |
| O  | 0.000056  | -0.000076 | 2.615763  |
| Ti | 0.943613  | -1.352108 | 1.814333  |
| O  | 2.627844  | -0.949694 | 1.521624  |
| Ti | 3.260590  | 0.124464  | -0.000018 |
| O  | 4.871169  | 0.328555  | -0.000036 |
| O  | 2.627791  | -0.949552 | -1.521738 |
| Ti | 0.943549  | -1.351961 | -1.814390 |
| O  | -0.000054 | 0.000072  | -2.615762 |
| O  | -2.308444 | -1.860568 | -0.000067 |
| Ti | -0.769473 | -2.720073 | -0.000063 |
| O  | 0.057833  | -2.990564 | 1.642176  |
| O  | 0.057835  | -2.990461 | -1.642318 |

8b

E = -8000.477682 Hartree

|    |           |           |           |
|----|-----------|-----------|-----------|
| O  | 4.845110  | -0.128391 | 0.559242  |
| Ti | 3.255186  | -0.071115 | 0.241622  |
| Ti | 1.143200  | 2.408591  | -0.965773 |
| O  | 2.121217  | -0.078199 | 1.831242  |
| Ti | 0.390930  | -0.041618 | 1.753735  |
| O  | -0.354475 | 1.524456  | 2.456961  |
| O  | 0.093031  | 3.601136  | 0.035223  |
| Ti | -0.997000 | 2.420968  | 1.007955  |
| O  | -2.567435 | 1.741775  | 0.570966  |
| O  | -0.440177 | -1.579351 | 2.427008  |
| O  | 0.061043  | 1.126316  | 0.011416  |
| O  | 2.686441  | 1.655163  | -0.543251 |
| Ti | -3.255071 | 0.071316  | -0.243512 |
| Ti | -1.145588 | -2.406335 | 0.964778  |
| O  | -2.118331 | 0.075279  | -1.831836 |
| Ti | -0.387862 | 0.041194  | -1.750971 |
| O  | 0.358594  | -1.523255 | -2.456364 |
| O  | -0.097323 | -3.600720 | -0.035751 |
| Ti | 0.996793  | -2.422637 | -1.007035 |
| O  | 2.566985  | -1.745694 | -0.566209 |
| O  | 0.436443  | 1.582425  | -2.426801 |
| O  | -0.059936 | -1.126319 | -0.010868 |
| O  | -2.688833 | -1.655467 | 0.541524  |
| O  | -4.843972 | 0.129842  | -0.564702 |

9a

E = -9000.563514 Hartree

|    |           |           |           |
|----|-----------|-----------|-----------|
| Ti | -2.323404 | 2.032666  | 0.611312  |
| O  | -0.630499 | 1.199615  | 0.053726  |
| O  | -1.763750 | 1.448579  | 2.264233  |
| O  | -3.480154 | 0.930016  | -0.084228 |
| Ti | -3.292293 | -0.845246 | -0.920576 |
| O  | -4.590688 | -1.315717 | -1.777074 |
| O  | -2.658297 | -2.179069 | 0.376947  |
| O  | -1.695831 | -0.528205 | -1.956669 |
| Ti | -0.045105 | -0.108576 | -1.559244 |
| O  | 1.479145  | 3.105441  | 0.002851  |
| Ti | -0.020432 | 2.787393  | -0.939541 |
| O  | -1.650961 | 3.467568  | -0.372530 |
| O  | 0.173701  | 1.641990  | -2.311098 |
| O  | 1.972884  | 0.358296  | -0.529657 |
| Ti | -0.400006 | 0.239790  | 1.918432  |
| O  | 1.221901  | 0.900623  | 2.246420  |
| O  | -0.032073 | -1.134049 | 0.353795  |
| O  | -0.916857 | -1.370928 | 2.670979  |
| Ti | -1.150812 | -2.491186 | 1.212800  |
| O  | 0.868711  | -1.696632 | -1.995534 |
| O  | 0.089791  | -3.655158 | 0.485994  |
| Ti | 1.232526  | -2.469571 | -0.396741 |
| Ti | 2.257789  | 1.559246  | 0.806066  |
| O  | 4.723429  | -0.496324 | -1.611248 |
| Ti | 3.757122  | -0.513455 | -0.303987 |

|   |          |           |          |
|---|----------|-----------|----------|
| O | 3.937130 | 1.031992  | 0.909148 |
| O | 2.910111 | -2.233459 | 0.095513 |

10a

E = -10000.657532 Hartree

|    |           |           |           |
|----|-----------|-----------|-----------|
| Ti | -0.218257 | 0.658390  | -2.520912 |
| O  | -1.633545 | 1.735198  | -3.001364 |
| O  | -3.396475 | 0.781221  | -0.623982 |
| Ti | -2.362490 | 2.022489  | -1.301277 |
| Ti | -0.440759 | 2.483647  | 0.726350  |
| O  | -0.616949 | 1.237831  | -0.745354 |
| O  | -1.851558 | 3.352082  | -0.141494 |
| O  | -1.020547 | 1.524860  | 2.156067  |
| O  | 1.583201  | 0.646412  | -2.843097 |
| O  | 1.262053  | 2.910622  | 0.718008  |
| Ti | 2.744860  | -0.185428 | -1.642328 |
| O  | 3.538832  | 1.005604  | -0.646930 |
| O  | 2.274681  | 0.355982  | 1.990892  |
| Ti | 2.915675  | 1.886460  | 0.997463  |
| O  | 4.072917  | 2.726715  | 1.770045  |
| O  | 0.136236  | -1.044931 | 3.292819  |
| Ti | 2.097340  | -2.683844 | -0.475780 |
| Ti | -0.830309 | -1.934337 | -0.746454 |
| O  | 3.317651  | -1.975567 | -1.678772 |
| O  | -0.766154 | -1.022983 | -2.370496 |
| O  | 0.423800  | -3.309169 | -0.881030 |
| O  | 2.238744  | -2.628649 | 1.334203  |
| O  | -2.522422 | -2.244264 | -0.483292 |
| Ti | 1.289850  | -1.081206 | 1.835606  |
| O  | -5.294687 | -1.348254 | 0.318110  |
| O  | -0.537935 | -0.974594 | 0.923001  |
| Ti | -3.728522 | -0.922994 | 0.355800  |
| O  | 1.463581  | -0.897922 | -0.421139 |
| Ti | -1.342451 | -0.267855 | 2.470313  |
| O  | -3.015005 | -0.762330 | 2.162158  |

10b

E = -10000.656193 Hartree

|    |           |           |           |
|----|-----------|-----------|-----------|
| Ti | -0.501192 | 2.998681  | 1.608746  |
| Ti | 0.646146  | -2.634732 | 2.107116  |
| Ti | -2.244312 | 0.965355  | 0.608875  |
| Ti | 2.294145  | -0.855846 | 0.596795  |
| Ti | 0.104946  | 0.239666  | 2.414233  |
| Ti | 0.890412  | 2.190508  | -0.848603 |
| Ti | -0.930395 | -2.307399 | -0.347907 |
| Ti | -2.906718 | -0.740559 | -1.689633 |
| Ti | 2.748746  | 0.370639  | -2.028596 |
| Ti | -0.105237 | -0.225447 | -2.422091 |
| O  | -2.255359 | 2.763247  | 1.240993  |
| O  | -0.239576 | 1.393770  | 0.670410  |
| O  | 0.301077  | -1.240024 | 0.902721  |
| O  | 2.364085  | -2.494408 | 1.565064  |



|   |           |           |           |
|---|-----------|-----------|-----------|
| O | -0.010716 | 1.977020  | 3.087833  |
| O | 0.287714  | -1.334265 | 3.397227  |
| O | -1.885182 | 0.016951  | 2.038833  |
| O | 2.049263  | 0.364803  | 1.833037  |
| O | 0.550146  | 3.690513  | 0.263016  |
| O | -0.490852 | -3.570872 | 0.999904  |
| O | -3.681526 | 0.457976  | -0.524552 |
| O | 3.625765  | -0.598079 | -0.728468 |
| O | -1.357049 | -0.333692 | -0.712751 |
| O | 2.584553  | 2.142946  | -1.720267 |
| O | -2.691925 | -2.422458 | -1.071447 |
| O | 1.289450  | 0.178053  | -0.867656 |
| O | -0.250717 | 1.777578  | -2.116045 |
| O | 1.525491  | -0.172885 | -3.328777 |
| O | 0.094000  | -2.145405 | -1.759410 |
| O | -1.799123 | -0.453149 | -3.166736 |

11a

E = -11000.747441 Hartree

|    |           |           |           |
|----|-----------|-----------|-----------|
| Ti | 2.098411  | -1.019859 | 1.424991  |
| O  | 3.847132  | -1.072226 | 1.558441  |
| O  | 0.842191  | -1.883752 | 2.505565  |
| Ti | -0.904185 | -1.590476 | 2.145698  |
| O  | 1.662256  | 0.735472  | 1.316511  |
| O  | -0.949207 | -1.326380 | 0.287528  |
| Ti | -2.182269 | 1.403491  | 1.708010  |
| O  | -3.786633 | 0.971152  | 1.177328  |
| O  | -1.522173 | 0.032570  | 2.751119  |
| Ti | -0.658661 | 3.201855  | 0.061437  |
| O  | -1.264508 | 3.102213  | -1.664047 |
| O  | -1.141922 | 1.311685  | 0.078380  |
| O  | -1.668645 | 3.202912  | 1.616736  |
| O  | 1.122911  | 3.331671  | 0.167383  |
| Ti | 2.359964  | 1.886203  | 0.062817  |
| O  | 4.098342  | 1.755763  | 0.331402  |
| O  | -6.074184 | 0.034717  | -0.573710 |
| Ti | -2.233151 | -2.694070 | -0.046777 |
| O  | -1.130927 | -3.097621 | -1.515590 |
| O  | -2.009072 | -3.014488 | 1.782216  |
| O  | -3.704915 | -1.800915 | -0.369082 |
| Ti | -4.461078 | -0.001579 | -0.383516 |
| Ti | 0.031519  | -1.685780 | -1.628632 |
| O  | -0.814154 | -0.197692 | -2.297385 |
| O  | 1.662038  | -1.470209 | -0.379489 |
| Ti | 2.662667  | -0.728748 | -1.846881 |
| O  | 1.418829  | -1.736750 | -2.831401 |
| Ti | 4.961322  | -0.025171 | 0.312173  |
| O  | 4.356259  | -0.854896 | -1.376762 |
| O  | 6.563284  | -0.040279 | 0.586910  |
| O  | 2.116638  | 0.987862  | -1.538410 |
| Ti | -1.738274 | 1.280855  | -1.762294 |
| O  | -3.448267 | 0.955706  | -1.742965 |

12a

E = -12000.856365 Hartree

|    |           |           |           |
|----|-----------|-----------|-----------|
| O  | -2.745127 | 2.119494  | -2.093488 |
| Ti | -2.340669 | 0.277064  | -1.898525 |
| Ti | 0.328762  | -0.312147 | -2.484360 |
| O  | -3.720526 | -0.744743 | -1.674013 |
| O  | -4.191523 | -0.254513 | 1.310218  |
| O  | -0.791074 | -1.024852 | -1.141947 |
| Ti | -4.162532 | -1.705713 | -0.005558 |
| O  | -1.187588 | 0.017205  | -3.394467 |
| O  | -5.536740 | -2.565981 | -0.066268 |
| Ti | -3.190687 | 1.168676  | 1.567953  |
| O  | -1.921926 | 1.144413  | 2.900213  |
| O  | 2.563107  | 2.824250  | -0.223108 |
| O  | 0.741071  | 1.301586  | -1.793016 |
| Ti | 0.896541  | 2.290094  | -0.262086 |
| O  | -2.008945 | 1.010808  | 0.041997  |
| O  | -3.523768 | 2.859249  | 0.862463  |
| Ti | -2.291641 | 2.826966  | -0.502352 |
| O  | -0.580856 | 3.431089  | -0.241169 |
| Ti | -0.898983 | -2.290983 | 0.269125  |
| O  | 1.923769  | -1.141987 | -2.903611 |
| O  | -2.565672 | -2.824812 | 0.229478  |
| Ti | 3.195135  | -1.166828 | -1.574171 |
| O  | 3.525771  | -2.857552 | -0.867882 |
| O  | 0.578934  | -3.431002 | 0.240005  |
| Ti | 2.290224  | -2.824499 | 0.494124  |
| O  | 2.007755  | -1.009543 | -0.051133 |
| O  | 0.784488  | 1.018106  | 1.145452  |
| Ti | -0.326416 | 0.308091  | 2.496767  |
| O  | -0.739260 | -1.303602 | 1.802088  |
| O  | 1.196709  | -0.015143 | 3.399272  |
| O  | 2.741792  | -2.119605 | 2.086565  |
| O  | 4.192547  | 0.258212  | -1.312727 |
| O  | 3.719579  | 0.742930  | 1.672205  |
| Ti | 2.338344  | -0.277019 | 1.895461  |
| Ti | 4.162022  | 1.706555  | 0.005548  |
| O  | 5.537209  | 2.565287  | 0.067573  |

12b

E = -12000.815155 Hartree

|    |           |           |           |
|----|-----------|-----------|-----------|
| O  | -3.273686 | -1.280197 | -2.416596 |
| O  | -2.684223 | 0.028920  | -0.006599 |
| O  | -5.136759 | -0.057222 | 0.007118  |
| Ti | -3.938016 | 1.211334  | 0.697004  |
| O  | -3.315144 | 1.242300  | 2.409152  |
| O  | -3.090854 | 2.573677  | -0.194009 |
| O  | -0.754024 | 1.251455  | 1.033244  |
| Ti | -1.514183 | -0.597035 | -2.540568 |
| O  | 0.162844  | -0.806977 | -3.397991 |
| O  | 2.686063  | 0.008590  | 0.017231  |

|    |           |           |           |
|----|-----------|-----------|-----------|
| O  | 3.057908  | -0.168386 | -2.570890 |
| O  | -1.703821 | 1.171895  | -2.321903 |
| Ti | -1.380045 | 1.991441  | -0.674135 |
| Ti | 3.893490  | 0.727821  | -1.209159 |
| O  | 0.761480  | 1.019653  | -1.250173 |
| O  | 3.270798  | 2.439371  | -1.245978 |
| O  | -0.194422 | 3.364892  | -0.813558 |
| Ti | -3.862609 | -1.248725 | -0.691174 |
| O  | -2.990889 | -2.581167 | 0.200436  |
| O  | -0.087547 | -3.410621 | 0.808929  |
| O  | -1.695941 | -1.198017 | 2.315677  |
| Ti | -1.545841 | 0.572759  | 2.520739  |
| Ti | -1.266735 | -2.031046 | 0.691615  |
| O  | 0.734955  | -1.040352 | 1.229308  |
| O  | 0.127295  | 0.805112  | 3.375151  |
| O  | 1.723809  | -2.306903 | -1.190801 |
| Ti | 1.344040  | -0.672940 | -2.021790 |
| Ti | 1.567806  | -2.520591 | 0.578073  |
| O  | -0.754127 | -1.264219 | -1.038978 |
| O  | 3.322555  | -2.390299 | 1.268343  |
| Ti | 1.492172  | 2.538461  | -0.590404 |
| Ti | 1.301088  | 0.695189  | 1.990537  |
| Ti | 3.909373  | -0.663765 | 1.250223  |
| O  | 3.012289  | 0.211455  | 2.582384  |
| O  | 5.138730  | 0.042877  | 0.018233  |
| O  | 1.681226  | 2.336175  | 1.179630  |

12c

E = -12000.799997 Hartree

|    |           |           |           |
|----|-----------|-----------|-----------|
| Ti | -0.013802 | 1.838523  | 1.611187  |
| Ti | -0.024215 | -1.856644 | 1.609830  |
| O  | 1.627150  | 2.341801  | 2.359567  |
| Ti | 3.038107  | 1.660708  | 1.397954  |
| O  | 3.614703  | -0.008270 | 1.944097  |
| O  | 1.626091  | -2.362735 | 2.339240  |
| Ti | 3.033716  | -1.671286 | 1.382328  |
| O  | 1.980690  | -1.146413 | -0.011847 |
| O  | 4.033966  | -2.459060 | 0.009081  |
| O  | 4.030966  | 2.461162  | 0.027339  |
| O  | 1.976241  | 1.149312  | 0.006151  |
| Ti | 3.058686  | 1.675115  | -1.365447 |
| Ti | -3.059716 | 1.666079  | 1.371539  |
| O  | -1.671713 | -2.369498 | 2.338399  |
| O  | -3.647228 | -0.000805 | 1.914297  |
| O  | -1.657810 | 2.350079  | 2.346266  |
| O  | 0.000452  | -2.731077 | -0.000836 |
| O  | -0.018238 | -0.011080 | 1.734626  |
| O  | 1.655699  | 2.367968  | -2.330985 |
| Ti | 3.067210  | -1.660986 | -1.380564 |
| O  | 1.664991  | -2.352334 | -2.349644 |
| O  | 3.645373  | 0.011857  | -1.919994 |
| O  | 0.011523  | 0.005129  | -1.733595 |

|    |           |           |           |
|----|-----------|-----------|-----------|
| O  | -0.000046 | 2.737714  | 0.012154  |
| O  | -4.032218 | 2.460508  | -0.016669 |
| O  | -4.033471 | -2.460037 | -0.028885 |
| Ti | -3.067433 | -1.670648 | 1.366111  |
| Ti | 0.024370  | -1.841372 | -1.606430 |
| Ti | -3.031960 | -1.664092 | -1.396896 |
| O  | -1.617877 | -2.351258 | -2.348795 |
| O  | -1.980237 | -1.151016 | 0.000360  |
| O  | -1.976004 | 1.154166  | -0.002324 |
| Ti | 0.012945  | 1.851903  | -1.595398 |
| O  | -3.608873 | 0.003577  | -1.950766 |
| Ti | -3.037271 | 1.671069  | -1.392119 |
| O  | -1.625879 | 2.364799  | -2.343003 |

12d

E = -12000.720337 Hartree

|    |           |           |           |
|----|-----------|-----------|-----------|
| O  | 0.005574  | 1.699728  | -1.662510 |
| Ti | 0.002603  | 2.515336  | 0.006530  |
| O  | 1.570814  | 3.361038  | 0.196111  |
| O  | -0.049824 | -1.099455 | -1.189961 |
| Ti | -0.017476 | 0.123430  | -2.485487 |
| O  | 3.437048  | 1.454558  | -1.494898 |
| O  | 1.652699  | -0.023212 | -3.314212 |
| Ti | 3.326012  | -2.628963 | -0.103962 |
| O  | 3.463215  | -1.452101 | 1.481025  |
| Ti | 3.292758  | -0.046974 | 2.495365  |
| O  | 1.563989  | -3.334822 | -0.199205 |
| O  | 1.687248  | 0.005503  | 3.325551  |
| Ti | 3.327171  | 2.635844  | 0.082652  |
| O  | 3.597802  | 1.408496  | 1.595344  |
| O  | 3.594494  | -1.401116 | -1.614446 |
| Ti | 3.269480  | 0.051853  | -2.510864 |
| Ti | -0.014131 | -2.519391 | 0.017051  |
| O  | 0.017009  | 1.089040  | 1.204880  |
| O  | -1.575338 | 3.344128  | 0.178063  |
| O  | -0.000174 | -1.709277 | 1.689048  |
| Ti | 0.010722  | -0.129474 | 2.504301  |
| O  | -3.582843 | 1.431483  | 1.598725  |
| O  | -1.657494 | 0.043640  | 3.336257  |
| Ti | -3.316850 | -2.636919 | -0.055821 |
| O  | -3.532617 | -1.422030 | -1.585827 |
| Ti | -3.283973 | 0.025380  | -2.513633 |
| O  | -1.571498 | -3.389677 | -0.145033 |
| O  | -1.677293 | 0.003698  | -3.341782 |
| Ti | -3.333966 | 2.624056  | 0.057739  |
| O  | -3.475882 | 1.437465  | -1.513465 |
| O  | -3.427790 | -1.424044 | 1.496204  |
| Ti | -3.262932 | -0.015524 | 2.506011  |
| O  | -4.503900 | 3.760978  | 0.024869  |
| O  | -4.499149 | -3.760709 | -0.003329 |
| O  | 4.496684  | 3.772231  | 0.038762  |
| O  | 4.468823  | -3.791844 | -0.099842 |

13a

E = -13000.922530 Hartree

|    |           |           |           |
|----|-----------|-----------|-----------|
| O  | 0.000001  | 0.000007  | -1.809907 |
| O  | 1.194271  | -3.697521 | -1.769680 |
| O  | 2.083554  | -1.065672 | -2.801311 |
| Ti | -1.960574 | -0.633359 | -2.106094 |
| O  | -2.083599 | 1.065733  | -2.801172 |
| O  | -1.065691 | -2.083549 | -2.801265 |
| O  | -3.697568 | -1.194173 | -1.769663 |
| Ti | 0.633374  | -1.960527 | -2.106048 |
| O  | 2.659833  | -3.085615 | 0.909442  |
| O  | -0.872606 | -1.705319 | 2.555162  |
| O  | -1.903619 | -0.614492 | -0.076256 |
| Ti | -3.745547 | -1.209616 | 0.061874  |
| Ti | -1.221332 | -2.386708 | 1.046711  |
| O  | -3.085745 | -2.659743 | 0.909598  |
| O  | -0.351960 | -4.058686 | 0.909909  |
| O  | 0.614514  | -1.903525 | -0.076317 |
| Ti | 1.209629  | -3.745436 | 0.061837  |
| O  | -4.058780 | 0.351847  | 0.910138  |
| Ti | -0.000006 | -0.000073 | 3.267615  |
| O  | -0.000105 | -0.000206 | 4.885122  |
| O  | 1.705259  | -0.872874 | 2.555232  |
| O  | 0.873064  | 1.705008  | 2.555185  |
| Ti | -0.633342 | 1.960586  | -2.106026 |
| Ti | -1.209643 | 3.745554  | 0.061912  |
| O  | -1.194101 | 3.697597  | -1.769621 |
| O  | 0.351689  | 4.058696  | 0.910440  |
| Ti | 1.221226  | 2.386752  | 1.046767  |
| O  | -0.614414 | 1.903618  | -0.076279 |
| Ti | -2.386745 | 1.221209  | 1.046730  |
| O  | -1.705181 | 0.872750  | 2.555156  |
| O  | -2.659814 | 3.085595  | 0.909426  |
| Ti | 3.745469  | 1.209613  | 0.061899  |
| O  | 4.058824  | -0.351826 | 0.910179  |
| O  | 1.903609  | 0.614414  | -0.076231 |
| Ti | 1.960559  | 0.633350  | -2.106030 |
| O  | 3.697588  | 1.194090  | -1.769632 |
| O  | 3.085583  | 2.659950  | 0.909243  |
| O  | 1.065732  | 2.083602  | -2.801177 |
| Ti | 2.386810  | -1.221237 | 1.046772  |

13b

E = -13000.897283 Hartree

|    |           |           |           |
|----|-----------|-----------|-----------|
| Ti | -0.418123 | -2.331924 | 2.504541  |
| Ti | 0.325323  | -2.811605 | -0.425135 |
| Ti | -1.754905 | -1.447122 | -2.013803 |
| O  | -1.305562 | -3.053763 | -1.379367 |
| O  | -0.111736 | -3.560796 | 1.206282  |
| O  | -2.252353 | -2.074592 | 2.802669  |
| O  | 1.708358  | -3.498541 | -1.362405 |

|    |           |           |           |
|----|-----------|-----------|-----------|
| Ti | 1.793979  | -0.474756 | 1.996905  |
| Ti | -2.589962 | -0.646922 | 1.697117  |
| O  | 1.254227  | -1.801543 | 3.145381  |
| O  | -4.315701 | -0.690342 | 1.004501  |
| O  | 0.985771  | 1.013625  | 2.820784  |
| O  | 3.600316  | -0.152563 | 2.061523  |
| Ti | 4.008250  | 0.472684  | 0.347017  |
| Ti | 2.319257  | 2.308414  | -0.919571 |
| Ti | -4.101598 | -0.172349 | -0.772917 |
| O  | -0.497735 | -0.822315 | 1.511549  |
| O  | -0.742186 | -0.974395 | -3.512153 |
| O  | -3.890429 | 1.569244  | -1.220533 |
| O  | 4.352866  | -1.000569 | -0.648553 |
| O  | 1.376682  | 3.787757  | -0.277558 |
| O  | 2.168309  | 0.825123  | 0.214879  |
| O  | -3.649608 | -1.306106 | -2.117431 |
| O  | 1.854370  | -1.695912 | 0.323804  |
| Ti | 2.834549  | -1.958352 | -1.233504 |
| Ti | 0.525143  | 0.026214  | -2.598934 |
| O  | 4.148776  | 2.071320  | -0.584660 |
| O  | -0.051195 | -0.882366 | -1.134517 |
| O  | 2.168958  | -0.989171 | -2.549728 |
| Ti | -0.591764 | 1.633764  | 2.239589  |
| O  | -2.278195 | 0.924115  | 2.566173  |
| O  | -0.548130 | 3.472105  | 2.210273  |
| Ti | -0.319709 | 3.699475  | 0.380207  |
| Ti | -2.022471 | 1.863701  | -1.045510 |
| O  | -0.523553 | 1.812613  | 0.349388  |
| O  | -1.094015 | 1.353578  | -2.394215 |
| O  | -2.272505 | -0.158938 | -0.326052 |
| O  | -1.726428 | 3.729491  | -0.735674 |
| O  | 1.618783  | 1.659580  | -2.403364 |

14a

E = -14001.041381 Hartree

|    |           |           |           |
|----|-----------|-----------|-----------|
| O  | 4.492363  | -2.506663 | -0.956957 |
| Ti | 3.800703  | -0.909051 | -1.666795 |
| Ti | 0.679674  | -0.953462 | -2.296263 |
| O  | 4.733223  | 0.554911  | -1.823912 |
| O  | 4.681288  | 1.551808  | 1.008642  |
| O  | 0.628396  | 0.677790  | -1.504621 |
| Ti | 4.500642  | 2.235441  | -0.830820 |
| Ti | 0.993151  | 2.291077  | -0.724167 |
| O  | 2.443367  | -1.048566 | -2.868251 |
| O  | 2.652936  | 2.778533  | -1.096424 |
| O  | 5.576157  | 3.390072  | -1.217598 |
| O  | -0.572902 | 3.308803  | -0.970735 |
| Ti | 0.808694  | 0.683408  | 2.388370  |
| Ti | 3.903923  | 0.188200  | 1.770719  |
| O  | 2.562939  | 0.560262  | 2.953409  |
| O  | 0.938995  | 1.870187  | 1.056792  |
| O  | 0.702675  | -2.222737 | -0.988251 |

|    |           |           |           |
|----|-----------|-----------|-----------|
| O  | 3.112992  | -0.708299 | 0.195402  |
| O  | 4.692933  | -1.493094 | 2.023695  |
| Ti | 3.823732  | -2.449488 | 0.737177  |
| O  | 2.274980  | -3.283612 | 1.183668  |
| Ti | -2.210972 | 2.539503  | -0.889688 |
| O  | -3.846663 | 3.232281  | -0.363178 |
| Ti | -4.357596 | 1.904889  | 0.825776  |
| O  | -3.990407 | 1.702473  | 2.641792  |
| O  | -0.751464 | 1.161155  | 3.282091  |
| Ti | -2.375343 | 0.825821  | 2.506177  |
| O  | -2.392347 | 1.450113  | 0.693391  |
| O  | -1.975833 | -1.012673 | -0.564087 |
| Ti | 0.586139  | -2.547993 | 0.780148  |
| O  | 0.473335  | -0.943759 | 1.663978  |
| O  | -1.055055 | -3.264294 | 1.049162  |
| O  | -2.623615 | -0.919321 | 2.300260  |
| O  | -5.038603 | 0.493241  | 0.072804  |
| O  | -4.127045 | -2.534450 | 0.329459  |
| Ti | -2.505070 | -2.076984 | 0.830100  |
| O  | -4.029618 | -1.132521 | -2.446010 |
| O  | -2.438367 | 1.365632  | -2.205828 |
| Ti | -5.111090 | -1.297092 | -0.828167 |
| Ti | -2.392188 | -0.502505 | -2.277427 |
| O  | -6.642264 | -1.757989 | -1.113789 |
| O  | -0.879494 | -1.081632 | -3.229038 |

14b

E = -14000.981339 Hartree

|    |           |           |           |
|----|-----------|-----------|-----------|
| O  | -4.551440 | 2.354002  | -1.000617 |
| O  | -2.619323 | 0.700725  | 2.728731  |
| O  | -4.369942 | -0.083549 | 0.868813  |
| Ti | -2.804997 | -0.953838 | 1.839608  |
| O  | -3.112931 | -2.355240 | 0.465052  |
| O  | -1.649795 | -2.018885 | 2.824753  |
| O  | -0.137288 | -3.050441 | 0.487130  |
| Ti | -2.838137 | 2.902472  | -0.662913 |
| O  | 0.055535  | 1.794296  | 0.078518  |
| O  | -2.337307 | 3.090102  | 1.072688  |
| O  | 2.601458  | 3.035441  | 1.104647  |
| Ti | -1.424371 | 1.586683  | 1.706730  |
| O  | 0.128011  | 1.811788  | 2.633524  |
| Ti | -0.064723 | -1.892850 | 1.872989  |
| Ti | 1.631973  | 1.497347  | 1.580867  |
| O  | -1.233880 | -0.353772 | 0.961807  |
| O  | 2.749329  | 0.511884  | 2.579931  |
| O  | 1.537245  | -2.154161 | 2.790807  |
| Ti | -4.222349 | 0.487575  | -0.768890 |
| O  | -2.414019 | 1.109766  | -0.744047 |
| O  | -4.144507 | -1.037174 | -1.836811 |
| O  | 0.044170  | 1.063493  | -2.330465 |
| Ti | -2.919220 | -2.319937 | -1.269921 |
| O  | -1.802036 | -3.755821 | -1.834665 |

|    |           |           |           |
|----|-----------|-----------|-----------|
| Ti | -0.164843 | -3.060798 | -1.367509 |
| Ti | -0.092199 | -0.037766 | -0.870975 |
| O  | 1.097485  | -1.373426 | -1.480547 |
| O  | -1.329276 | -1.342202 | -1.468782 |
| O  | 1.426386  | -3.807954 | -1.923532 |
| O  | -1.442871 | 3.605037  | -1.721031 |
| Ti | 3.143147  | 2.750577  | -0.607080 |
| Ti | 0.136986  | 2.719469  | -1.578176 |
| O  | 4.765144  | 2.001235  | -1.008880 |
| O  | 2.546971  | 0.998111  | -0.458474 |
| O  | 1.809594  | 3.444830  | -1.719101 |
| O  | 1.130007  | -0.486792 | 0.955506  |
| Ti | 2.717408  | -1.189029 | 1.757726  |
| Ti | 2.625607  | -2.439528 | -1.376135 |
| Ti | 4.274186  | 0.174482  | -0.732894 |
| O  | 3.947169  | -1.230294 | -1.904891 |
| O  | 4.453942  | -0.532587 | 0.838749  |
| O  | 2.856381  | -2.556767 | 0.351754  |

15a

E = -15001.074046 Hartree

|    |           |           |           |
|----|-----------|-----------|-----------|
| Ti | 3.645795  | -0.817621 | 0.441066  |
| O  | 3.955684  | 0.951829  | 0.158090  |
| O  | 3.805384  | -1.768224 | -1.115847 |
| Ti | -0.342095 | 0.475237  | 3.344139  |
| Ti | 2.877475  | 2.379794  | -0.181801 |
| O  | -0.060713 | 2.349081  | 3.297113  |
| O  | 2.411489  | 3.250174  | 1.354237  |
| O  | 3.468188  | -1.261144 | 2.231461  |
| O  | 0.998025  | 0.666307  | 1.830846  |
| Ti | 0.652452  | 2.672636  | 1.657574  |
| O  | -1.230502 | 1.683371  | 0.399082  |
| Ti | 2.029492  | -2.052908 | -1.622779 |
| Ti | 0.209956  | -0.549884 | -3.350659 |
| O  | 1.798735  | -1.141129 | 0.376868  |
| O  | 0.775717  | 1.090685  | -3.943302 |
| O  | -2.998763 | -2.437509 | -1.579018 |
| O  | 1.357381  | -2.058290 | -3.317226 |
| Ti | 0.432958  | -3.500008 | 0.442966  |
| O  | 1.675622  | -3.720715 | -0.854552 |
| Ti | 1.627629  | -1.307775 | 2.431042  |
| Ti | -0.048932 | -0.020142 | 0.005232  |
| Ti | 0.975784  | 1.930054  | -2.306268 |
| O  | -0.770325 | -0.741806 | 1.800083  |
| O  | 1.108681  | 1.764628  | -0.266993 |
| O  | -0.312593 | 3.220000  | -2.054954 |
| O  | 1.051504  | -3.024736 | 2.108138  |
| O  | -0.347781 | -2.007924 | -0.444626 |
| O  | -2.198998 | -0.507495 | -0.086189 |
| O  | 2.619166  | 2.734035  | -1.980554 |
| O  | 0.891283  | -0.701079 | 4.020344  |
| Ti | -2.723795 | -0.532367 | 1.990984  |



|    |           |           |           |
|----|-----------|-----------|-----------|
| Ti | -1.237345 | 3.383354  | -0.478892 |
| O  | -2.157876 | 0.112676  | 3.619375  |
| O  | -0.839282 | 0.393684  | -1.856000 |
| O  | -0.279835 | 4.099067  | 0.873540  |
| Ti | -2.475444 | -0.708846 | -2.169225 |
| O  | -1.546372 | -1.039075 | -3.728661 |
| O  | -3.705259 | 0.594846  | -1.874511 |
| Ti | -2.235868 | -2.630621 | 0.028898  |
| Ti | -3.181952 | 1.331113  | -0.229393 |
| O  | -3.045695 | 3.167521  | -0.538751 |
| O  | -1.254596 | -4.183924 | 0.386494  |
| O  | -3.903481 | 0.796289  | 1.318773  |
| O  | 1.350613  | -0.177101 | -1.738434 |
| O  | -3.182204 | -2.247090 | 1.597240  |

16a

E = -16001.237739 Hartree

|    |           |           |           |
|----|-----------|-----------|-----------|
| Ti | 1.568607  | -0.135955 | 2.513599  |
| Ti | 1.351747  | -2.702351 | 0.014046  |
| O  | 3.330349  | -0.319385 | 3.052673  |
| Ti | 4.657072  | -0.388866 | 1.805532  |
| O  | 5.397026  | -2.098705 | 1.577486  |
| O  | 3.046314  | -3.529577 | 0.027118  |
| Ti | 4.602488  | -2.592858 | 0.013863  |
| O  | 3.907526  | -0.768998 | 0.004160  |
| O  | 1.673068  | 1.251009  | -1.419546 |
| Ti | 1.567258  | -0.173594 | -2.506863 |
| O  | 0.002227  | -0.013856 | -3.474370 |
| O  | 1.348390  | -1.635685 | -1.451485 |
| O  | 3.327814  | -0.345321 | -3.052548 |
| O  | 5.390457  | -2.116436 | -1.558876 |
| O  | 5.493323  | 1.109381  | 1.494248  |
| O  | 5.490322  | 1.093885  | -1.509598 |
| Ti | 4.653261  | -0.407296 | -1.803780 |
| O  | 3.489430  | 3.032397  | -0.016472 |
| O  | 1.668574  | 1.299325  | 1.440339  |
| Ti | 5.312671  | 2.362923  | -0.014001 |
| Ti | 1.831925  | 2.416647  | -0.008507 |
| O  | -1.342625 | 1.579785  | -1.436969 |
| O  | 6.426597  | 3.545915  | -0.020206 |
| O  | 0.286608  | 3.486513  | -0.028945 |
| O  | -5.390086 | 2.116732  | 1.558970  |
| Ti | -4.653387 | 0.407317  | 1.803653  |
| Ti | -1.567232 | 0.174195  | 2.506854  |
| O  | -5.490772 | -1.093665 | 1.509382  |
| O  | -5.492559 | -1.109733 | -1.494420 |
| O  | -1.671817 | -1.249209 | 1.417800  |
| Ti | -5.312598 | -2.362996 | 0.014127  |
| Ti | -1.831906 | -2.416701 | 0.008345  |
| O  | -3.327966 | 0.344486  | 3.052391  |
| O  | -0.002286 | 0.013841  | 3.474426  |
| O  | -3.489351 | -3.032593 | 0.018102  |

|    |           |           |           |
|----|-----------|-----------|-----------|
| O  | -6.426629 | -3.545880 | 0.020128  |
| O  | -0.286571 | -3.486578 | 0.028845  |
| O  | 1.343099  | -1.581772 | 1.438689  |
| Ti | -1.568726 | 0.135264  | -2.513529 |
| Ti | -4.657135 | 0.389020  | -1.805642 |
| O  | -3.330278 | 0.320469  | -3.052675 |
| O  | -1.669920 | -1.301220 | -1.442025 |
| O  | -1.348962 | 1.637544  | 1.453146  |
| Ti | -1.351691 | 2.702277  | -0.013751 |
| O  | -3.907570 | 0.769088  | -0.004243 |
| O  | -5.397458 | 2.098673  | -1.577278 |
| Ti | -4.602394 | 2.592963  | -0.013977 |
| O  | -3.046170 | 3.529597  | -0.028165 |

16b

E = -16001.192433 Hartree

|    |           |           |           |
|----|-----------|-----------|-----------|
| O  | 0.002844  | 2.447965  | 0.000090  |
| O  | 1.605039  | 2.394548  | 2.439882  |
| Ti | 0.007252  | 1.858038  | -1.717841 |
| O  | 1.611227  | 2.441492  | -2.449000 |
| Ti | 3.110063  | 1.670729  | -1.704076 |
| Ti | 3.106609  | -1.643253 | -1.708855 |
| O  | 4.897189  | 2.227323  | -1.456423 |
| Ti | 5.642682  | 1.431734  | 0.023540  |
| O  | 6.890715  | 0.020300  | -0.005127 |
| O  | 4.899219  | -2.180795 | -1.480333 |
| Ti | 5.640093  | -1.390631 | 0.005770  |
| O  | 4.463969  | 0.022673  | 0.056530  |
| O  | 4.874139  | 2.230017  | 1.501565  |
| O  | 2.476807  | 1.569221  | -0.005812 |
| Ti | 3.105592  | 1.619557  | 1.707772  |
| O  | 3.142010  | 0.015194  | -2.443180 |
| O  | 3.113005  | -0.032305 | 2.473552  |
| O  | 2.496898  | -1.567327 | 0.002053  |
| O  | 0.001797  | -0.021020 | 1.705318  |
| Ti | -0.009725 | 1.830955  | 1.708747  |
| O  | -1.610549 | 2.397860  | 2.466823  |
| O  | 1.601040  | -2.467295 | 2.412392  |
| O  | 4.900150  | -2.226645 | 1.472025  |
| Ti | 3.111622  | -1.677143 | 1.715745  |
| O  | -4.883303 | 2.236092  | -1.452581 |
| O  | -3.119767 | 0.011214  | -2.446532 |
| Ti | -3.103317 | 1.658850  | -1.677686 |
| O  | -1.612503 | 2.443052  | -2.418429 |
| O  | -0.003946 | 0.004823  | -1.743198 |
| Ti | 0.000233  | -1.847378 | -1.755210 |
| O  | 1.619058  | -2.416996 | -2.467062 |
| Ti | -3.107682 | -1.671959 | 1.694295  |
| Ti | -3.111281 | 1.627079  | 1.728286  |
| O  | -4.895069 | -2.222365 | 1.461843  |
| Ti | -5.639373 | -1.388837 | -0.002983 |
| O  | -6.891596 | 0.019559  | 0.003410  |

|    |           |           |           |
|----|-----------|-----------|-----------|
| O  | -4.886761 | 2.222484  | 1.502749  |
| Ti | -5.644649 | 1.432837  | 0.020316  |
| O  | -4.463202 | 0.025785  | 0.022234  |
| O  | -4.905429 | -2.181933 | -1.491997 |
| O  | -2.499106 | -1.572080 | -0.019725 |
| Ti | -3.110415 | -1.652260 | -1.731138 |
| O  | -3.136521 | -0.030883 | 2.467868  |
| O  | -2.469154 | 1.559981  | 0.024911  |
| Ti | 0.001679  | -1.872832 | 1.681288  |
| O  | -1.603592 | -2.453186 | 2.412191  |
| O  | -0.001576 | -2.449261 | -0.042401 |
| O  | -1.611336 | -2.427580 | -2.470548 |

17a

E = -17001.308783 Hartree

|    |           |           |           |
|----|-----------|-----------|-----------|
| O  | 1.394368  | 2.865407  | 3.316948  |
| Ti | 2.410793  | 2.090121  | 1.950829  |
| O  | 4.780227  | -0.578902 | 0.018414  |
| O  | 3.610200  | 0.868590  | 2.671443  |
| O  | 2.678915  | 0.839862  | 0.249075  |
| O  | 2.925376  | 3.353177  | 0.714340  |
| O  | 3.885535  | 1.658446  | -1.956919 |
| Ti | 2.645511  | 2.611725  | -0.956094 |
| O  | 1.843319  | 3.835291  | -2.110006 |
| O  | -1.407678 | 3.518349  | 2.082165  |
| O  | -0.699662 | -0.120199 | -1.484204 |
| O  | 3.907510  | -2.326090 | 2.083135  |
| Ti | 3.691120  | -0.547876 | 1.511615  |
| Ti | 2.495728  | -3.051939 | 1.161247  |
| O  | 2.784250  | -3.420261 | -0.605870 |
| O  | 0.964150  | -3.788542 | 1.811163  |
| O  | 0.628179  | 1.385609  | 1.493066  |
| O  | -1.133766 | -2.280659 | 3.143664  |
| Ti | -0.272991 | 2.282053  | 2.843838  |
| O  | -1.125359 | 0.902438  | 3.688559  |
| Ti | 0.634259  | -0.095301 | -0.023998 |
| Ti | -1.739740 | -0.632507 | 2.834531  |
| O  | -0.764342 | -0.702317 | 1.271078  |
| O  | -3.542418 | -0.731369 | 2.405873  |
| O  | -2.236639 | 1.653411  | 0.132704  |
| Ti | 3.785874  | -0.083419 | -1.430230 |
| O  | 3.852925  | -1.550898 | -2.621469 |
| O  | 1.935397  | -0.700287 | -1.432507 |
| O  | -0.687755 | 2.152636  | -3.343863 |
| O  | -1.514796 | -0.938679 | -3.681076 |
| Ti | 0.140454  | 3.168719  | -2.063587 |
| O  | -1.019190 | 4.053615  | -0.947465 |
| Ti | -2.126825 | 3.457005  | 0.378445  |
| Ti | -1.660849 | 0.644152  | -2.873515 |
| O  | -3.369065 | 1.174279  | -2.368212 |
| O  | 0.852016  | 1.847029  | -1.012423 |
| O  | -3.885533 | 3.458648  | -0.215188 |

|    |           |           |           |
|----|-----------|-----------|-----------|
| Ti | 2.321212  | -2.403495 | -2.075807 |
| O  | 0.796173  | -2.713124 | -3.059110 |
| Ti | -0.498762 | -2.750923 | 1.382149  |
| Ti | -0.736874 | -2.035339 | -2.280853 |
| O  | -1.931315 | -3.742208 | 0.821237  |
| O  | 1.898226  | -1.274293 | 1.151383  |
| O  | -2.123650 | -3.213419 | -2.041599 |
| O  | 0.100076  | -2.198452 | -0.454560 |
| Ti | -4.379784 | -1.076699 | 0.819432  |
| Ti | -3.891054 | 1.665119  | -0.693214 |
| Ti | -3.065134 | -3.110620 | -0.447018 |
| O  | -2.900304 | -1.309657 | -0.232358 |
| O  | -4.765818 | -2.819265 | 0.305489  |
| O  | -5.050132 | 0.482203  | 0.103223  |

18a

E = -18001.391791 Hartree

|    |           |           |           |
|----|-----------|-----------|-----------|
| O  | 0.832292  | -3.540732 | 0.574713  |
| O  | -0.988055 | -1.935685 | -0.946604 |
| Ti | 0.890552  | -3.130446 | -1.242695 |
| Ti | -1.997810 | -3.311993 | -1.419025 |
| O  | -0.518294 | -4.144212 | -2.047299 |
| O  | 2.472792  | -3.617695 | -1.824346 |
| Ti | -3.581500 | 1.702256  | -2.106380 |
| O  | -4.762726 | 0.454492  | -2.869358 |
| O  | -3.425241 | -2.501557 | -2.371283 |
| Ti | -4.307489 | -1.002312 | -1.858279 |
| O  | -2.903957 | 0.119301  | -1.249216 |
| O  | -2.751212 | -1.262233 | 1.062666  |
| Ti | -2.752625 | -3.012309 | 1.790518  |
| Ti | 0.455149  | -2.460880 | 1.944971  |
| O  | -1.147666 | -2.996477 | 2.691251  |
| O  | -2.658455 | -3.932571 | 0.247339  |
| O  | -4.406529 | -2.496149 | 2.407123  |
| O  | -5.252758 | -1.174852 | -0.300902 |
| O  | -4.103317 | 2.558732  | -0.686016 |
| O  | -4.578505 | 0.777268  | 1.875217  |
| Ti | -4.606789 | -0.904034 | 1.403178  |
| O  | -1.681050 | 1.304995  | 1.044547  |
| Ti | -4.117661 | 2.641130  | 1.296942  |
| Ti | -1.447852 | -0.147514 | 0.106054  |
| O  | 0.142528  | -0.774950 | 1.129849  |
| O  | 2.024353  | -2.307083 | 2.873165  |
| O  | -5.373064 | 3.565324  | 1.743458  |
| O  | 5.254989  | 1.177755  | 0.282093  |
| Ti | 4.604109  | 0.907103  | -1.419676 |
| Ti | 2.752404  | 3.027192  | -1.775233 |
| O  | 4.571447  | -0.775479 | -1.888392 |
| O  | 4.109652  | -2.566164 | 0.677748  |
| O  | 2.750458  | 1.266676  | -1.068086 |
| Ti | 4.102647  | -2.638974 | -1.303789 |
| Ti | 1.458100  | 0.145828  | -0.113512 |

|    |           |           |           |
|----|-----------|-----------|-----------|
| O  | 4.398373  | 2.508496  | -2.411515 |
| O  | 1.150629  | 3.016110  | -2.680674 |
| O  | 1.687294  | -1.312524 | -1.043459 |
| O  | 5.363650  | -3.561401 | -1.734526 |
| Ti | -0.449463 | 2.471456  | -1.935833 |
| O  | -2.013592 | 2.323372  | -2.872264 |
| O  | -0.139814 | 0.776264  | -1.133839 |
| O  | 0.989417  | 1.926099  | 0.943322  |
| Ti | 3.595604  | -1.705545 | 2.096191  |
| O  | -0.834150 | 3.541617  | -0.561077 |
| O  | 0.505135  | 4.119847  | 2.073426  |
| O  | 2.652576  | 3.933462  | -0.223884 |
| Ti | -0.903633 | 3.121934  | 1.255055  |
| Ti | 1.988656  | 3.297685  | 1.437948  |
| O  | 2.916480  | -0.125092 | 1.235526  |
| O  | 4.779649  | -0.454448 | 2.850201  |
| Ti | 4.315960  | 1.001884  | 1.844577  |
| O  | -2.488239 | 3.610049  | 1.827985  |
| O  | 3.429427  | 2.492680  | 2.370330  |

18b

E = -18001.384344 Hartree

|    |           |           |           |
|----|-----------|-----------|-----------|
| O  | 4.759002  | 2.670376  | -0.961209 |
| Ti | 2.997704  | 2.292580  | -1.438979 |
| O  | 0.890764  | -0.825374 | -1.482150 |
| O  | 2.804918  | 1.065067  | -2.797372 |
| O  | 1.761198  | 2.236944  | 0.171260  |
| O  | 1.810556  | 3.632872  | -1.872957 |
| O  | -0.415253 | 1.396853  | -1.046702 |
| Ti | 0.241029  | 3.225967  | -0.984985 |
| O  | -1.068614 | 3.406813  | -2.272015 |
| O  | -0.575932 | 4.107007  | 0.459874  |
| O  | 4.201399  | 1.770355  | 1.833975  |
| O  | 1.597392  | 1.657890  | 3.075533  |
| O  | 1.674837  | -1.732013 | -3.693217 |
| Ti | -0.675365 | -0.328137 | -0.241214 |
| Ti | 2.477934  | -0.715406 | -2.432378 |
| Ti | 0.086593  | -2.226819 | -2.810544 |
| O  | -1.435308 | -1.944973 | -3.797565 |
| O  | 0.277506  | -3.822950 | -1.936797 |
| O  | 3.696485  | -1.737814 | -1.484620 |
| O  | 3.525739  | 0.595807  | -0.333294 |
| O  | -1.267069 | -1.860421 | -1.350544 |
| Ti | 5.087578  | 1.348704  | 0.318525  |
| O  | 5.662730  | -0.414760 | 0.489269  |
| Ti | 2.456278  | 1.165601  | 1.526899  |
| Ti | 4.061232  | -1.344661 | 0.257114  |
| O  | 0.142874  | -1.971314 | 0.798168  |
| O  | 3.645093  | -2.887211 | 1.193091  |
| O  | 2.489690  | -0.749656 | 1.376639  |
| Ti | -2.110560 | 1.900082  | -2.059581 |
| O  | -2.376400 | 0.734512  | -3.428767 |

|    |           |           |           |
|----|-----------|-----------|-----------|
| O  | -2.471779 | 0.176907  | -1.000039 |
| O  | -3.725105 | 2.615468  | -1.437616 |
| O  | -4.860531 | 0.654679  | 0.472144  |
| Ti | -1.918178 | 3.587578  | 1.582750  |
| O  | -1.207510 | 2.907724  | 3.138853  |
| Ti | -0.193126 | 1.374001  | 3.116093  |
| Ti | -4.027255 | 2.346335  | 0.308469  |
| O  | -3.734026 | 3.912687  | 1.289036  |
| O  | -2.321764 | 1.965334  | 0.831168  |
| O  | -0.688084 | -0.103774 | 4.054217  |
| Ti | -2.564575 | -0.975208 | -2.656360 |
| O  | -4.155027 | -1.443597 | -1.871341 |
| Ti | -0.273849 | -3.609827 | -0.185721 |
| Ti | -4.022921 | -0.855350 | -0.083704 |
| O  | -1.939264 | -4.053439 | 0.481332  |
| O  | -2.295607 | -1.210212 | 0.957440  |
| O  | -4.508571 | -2.348225 | 0.938922  |
| O  | -0.203209 | 0.327472  | 1.578587  |
| Ti | 1.852940  | -2.679766 | 1.627928  |
| Ti | -0.562958 | -1.459321 | 2.795601  |
| Ti | -2.858831 | -2.877795 | 1.529610  |
| O  | -1.921992 | -2.640970 | 3.108076  |
| O  | 1.093211  | -4.213454 | 0.833597  |
| O  | 0.990057  | -2.338145 | 3.218847  |

18c

E = -18001.384308 Hartree

|    |           |           |           |
|----|-----------|-----------|-----------|
| Ti | 4.420595  | 1.734627  | -0.926750 |
| Ti | 3.644578  | 2.141588  | 1.731361  |
| O  | 3.460296  | 2.832369  | -2.049240 |
| Ti | 1.600503  | 2.970952  | -1.807579 |
| O  | 1.349272  | 3.519413  | -0.111076 |
| O  | 2.443676  | 3.392585  | 2.329444  |
| Ti | 0.721106  | 3.387292  | 1.600622  |
| O  | 3.011085  | 1.292091  | 0.206640  |
| O  | -0.725903 | 4.541008  | 1.877253  |
| O  | 0.191925  | 3.984819  | -2.518955 |
| O  | 0.936676  | 1.321126  | -2.069796 |
| Ti | 0.764874  | -0.338090 | -1.273569 |
| O  | 5.099424  | 2.518968  | 0.628619  |
| O  | 1.069558  | -0.333102 | 0.603232  |
| O  | 0.182901  | 1.720695  | 2.055950  |
| Ti | 4.004913  | -1.479337 | -1.261493 |
| O  | 5.024244  | 0.108395  | -1.535678 |
| O  | 3.962110  | -1.408339 | 0.545840  |
| O  | 3.445801  | 0.572417  | 2.672118  |
| O  | 2.444531  | -0.905425 | -1.849598 |
| Ti | -1.455755 | 3.654997  | -1.803074 |
| O  | -2.372414 | 4.964292  | -0.850841 |
| Ti | -2.216011 | 4.170988  | 0.829867  |
| O  | -1.305727 | 2.880615  | -0.116928 |
| O  | -3.717978 | 3.339967  | 1.505146  |

|    |           |           |           |
|----|-----------|-----------|-----------|
| O  | -2.260960 | 2.203800  | -2.608029 |
| Ti | -2.674600 | 0.724847  | -1.614070 |
| Ti | 1.454521  | -3.651822 | 1.808052  |
| O  | 2.372465  | -4.962931 | 0.858168  |
| Ti | 2.216519  | -4.172564 | -0.824066 |
| O  | 1.305622  | -2.880414 | 0.120463  |
| O  | 3.717524  | -3.341733 | -1.501770 |
| O  | 2.260141  | -2.199903 | 2.609885  |
| Ti | 2.674855  | -0.723521 | 1.613683  |
| O  | -2.445474 | 0.904964  | 1.848304  |
| O  | -3.962601 | 1.408852  | -0.546280 |
| O  | -3.442067 | -0.570463 | -2.674614 |
| Ti | -4.005933 | 1.478293  | 1.260957  |
| O  | -5.024741 | -0.110521 | 1.532317  |
| Ti | -4.421486 | -1.735993 | 0.921355  |
| Ti | -3.641596 | -2.140381 | -1.736054 |
| O  | -3.462396 | -2.833547 | 2.045427  |
| Ti | -1.602110 | -2.971539 | 1.807581  |
| O  | -1.349300 | -3.520737 | 0.111346  |
| O  | -2.441253 | -3.393062 | -2.331014 |
| Ti | -0.720058 | -3.389140 | -1.599785 |
| O  | -3.010800 | -1.292495 | -0.209453 |
| O  | 0.727312  | -4.543557 | -1.872683 |
| O  | -0.193550 | -3.982925 | 2.521617  |
| O  | -0.938238 | -1.320930 | 2.068958  |
| Ti | -0.765325 | 0.339104  | 1.272870  |
| O  | -5.098218 | -2.518683 | -0.635519 |
| O  | -1.069870 | 0.333545  | -0.604034 |
| O  | -0.181943 | -1.721983 | -2.054964 |

19a

E = -19001.465196 Hartree

|    |           |           |           |
|----|-----------|-----------|-----------|
| O  | 3.467805  | 1.132968  | 2.231823  |
| O  | 1.083409  | -4.066505 | 1.449212  |
| Ti | 3.580539  | -0.512721 | 1.465964  |
| Ti | 1.382774  | -2.381701 | 2.044139  |
| O  | 0.322935  | -2.276468 | 3.558601  |
| O  | 4.323393  | -2.352243 | -1.784677 |
| O  | 3.181885  | -2.121786 | 2.253029  |
| O  | 1.408879  | -0.308236 | 1.728855  |
| O  | 5.276467  | -0.718282 | 0.740416  |
| O  | 4.691888  | 0.763725  | -1.915114 |
| Ti | 4.920392  | -0.800411 | -1.057364 |
| O  | 1.385807  | 1.361140  | -0.100599 |
| O  | 3.087540  | -0.561894 | -0.484288 |
| O  | 1.781545  | 3.425374  | 1.481613  |
| O  | 0.671779  | 5.280115  | -0.595815 |
| O  | -2.686726 | -2.528304 | 2.966505  |
| Ti | -1.272818 | -1.469114 | 3.329556  |
| Ti | 0.013587  | 0.047007  | 0.295343  |
| Ti | -2.603521 | -2.634249 | 1.089280  |
| O  | -1.478009 | -3.864491 | 0.666455  |

|    |           |           |           |
|----|-----------|-----------|-----------|
| O  | -4.279457 | -3.112663 | 0.358245  |
| O  | -1.408636 | 0.138619  | 4.240709  |
| O  | -1.167015 | -1.121099 | 1.493234  |
| O  | -0.440054 | 1.479903  | 1.838903  |
| Ti | 1.712820  | 1.724255  | 2.164536  |
| O  | 1.034761  | 2.003881  | 3.861731  |
| Ti | -1.030479 | 4.676808  | -0.969636 |
| Ti | -0.773585 | 1.729538  | 3.678569  |
| O  | -0.161914 | 3.045968  | -1.109757 |
| O  | -2.098639 | 2.844987  | 3.121644  |
| O  | -1.997809 | 4.164645  | 0.510500  |
| Ti | 2.451684  | -2.345847 | -1.535811 |
| O  | 1.792705  | -4.059555 | -1.310495 |
| O  | 0.951637  | -2.023886 | 0.009115  |
| O  | 1.703336  | -1.635382 | -2.930598 |
| O  | -0.923147 | -1.335554 | -3.872946 |
| Ti | 2.895182  | 1.298424  | -1.557587 |
| O  | 1.926391  | 0.978780  | -2.950375 |
| Ti | 1.492260  | 3.604728  | -0.312625 |
| Ti | 0.340892  | -0.210955 | -3.199427 |
| O  | -0.703270 | 1.417275  | -3.469023 |
| O  | 2.931395  | 3.141460  | -1.291386 |
| O  | -0.382494 | -0.518613 | -1.530887 |
| Ti | 0.325382  | -3.802302 | -0.248662 |
| O  | -0.842656 | -3.376344 | -1.803606 |
| Ti | -4.430626 | -2.088470 | -1.119962 |
| Ti | -1.742833 | -1.999090 | -2.340587 |
| O  | -5.112188 | -0.421580 | -0.863923 |
| O  | -2.752106 | -1.290893 | -0.578443 |
| O  | -3.533677 | -2.512133 | -2.647200 |
| O  | -1.628814 | 1.230463  | -0.258450 |
| Ti | -2.171496 | 2.514328  | 1.279618  |
| Ti | -1.618734 | 2.215441  | -2.204486 |
| Ti | -3.588630 | 0.627032  | -0.566675 |
| O  | -3.347854 | 1.451582  | -2.127817 |
| O  | -3.793396 | 1.763658  | 0.894166  |
| O  | -1.963371 | 4.051450  | -2.423359 |

20a

E = -20001.620273 Hartree

|    |           |           |           |
|----|-----------|-----------|-----------|
| O  | 0.105754  | 1.440369  | -1.484477 |
| Ti | 0.004179  | -0.018848 | -2.567395 |
| O  | -1.603014 | 0.072462  | -3.467094 |
| O  | 0.047653  | 1.426237  | 1.407891  |
| Ti | 0.128829  | 2.549118  | -0.033597 |
| O  | -2.966004 | 1.498996  | -1.328244 |
| O  | -1.443260 | 3.543558  | -0.045595 |
| O  | -7.058019 | 1.994550  | 1.571303  |
| Ti | -6.263321 | 0.307698  | 1.803386  |
| Ti | -3.173668 | 0.214223  | 2.498175  |
| O  | -7.063374 | -1.210212 | 1.499147  |
| O  | -7.007179 | -1.246167 | -1.500155 |



|    |           |           |           |
|----|-----------|-----------|-----------|
| O  | -3.196228 | -1.138107 | 1.320612  |
| Ti | -6.817150 | -2.488149 | 0.019831  |
| Ti | -3.345563 | -2.399765 | -0.010622 |
| O  | -4.939535 | 0.253213  | 3.053461  |
| O  | -1.609417 | 0.073717  | 3.454050  |
| O  | -4.974955 | -3.090969 | 0.071345  |
| O  | -7.892662 | -3.706519 | 0.016031  |
| O  | -1.755937 | -3.373549 | 0.045142  |
| Ti | -3.165559 | 0.121283  | -2.499459 |
| Ti | -6.261785 | 0.299523  | -1.809150 |
| O  | -4.925240 | 0.317183  | -3.045456 |
| O  | -3.245866 | -1.387211 | -1.536262 |
| O  | -3.034263 | 1.757586  | 1.546934  |
| Ti | -3.064756 | 2.708894  | 0.012447  |
| O  | -5.536588 | 0.709158  | -0.003942 |
| O  | -7.096154 | 1.965231  | -1.569679 |
| Ti | -6.315017 | 2.498141  | -0.014166 |
| O  | -4.781606 | 3.476543  | -0.070583 |
| Ti | -0.003615 | 0.007991  | 2.551505  |
| O  | -0.090872 | -1.437634 | -1.427610 |
| O  | 1.609328  | -0.120877 | -3.469395 |
| O  | -0.049327 | -1.452213 | 1.467462  |
| Ti | -0.128753 | -2.558032 | 0.017871  |
| O  | 2.990477  | -1.596665 | -1.385049 |
| O  | 1.443326  | -3.553335 | 0.007960  |
| O  | 7.064467  | -1.962348 | 1.600333  |
| Ti | 6.257157  | -0.279951 | 1.813873  |
| Ti | 3.166237  | -0.158619 | 2.506122  |
| O  | 7.042285  | 1.242267  | 1.490383  |
| O  | 7.022964  | 1.224862  | -1.509718 |
| O  | 3.202753  | 1.229228  | 1.374101  |
| Ti | 6.815809  | 2.493713  | -0.015090 |
| Ti | 3.346036  | 2.405567  | -0.028793 |
| O  | 4.930914  | -0.233716 | 3.061723  |
| O  | 1.599601  | -0.034143 | 3.461058  |
| O  | 4.974736  | 3.102563  | 0.001384  |
| O  | 7.895140  | 3.708765  | -0.030500 |
| O  | 1.751529  | 3.373487  | -0.012613 |
| Ti | 3.174921  | -0.176640 | -2.505898 |
| Ti | 6.262546  | -0.316840 | -1.799279 |
| O  | 4.938879  | -0.331601 | -3.050202 |
| O  | 3.241065  | 1.296554  | -1.487771 |
| O  | 3.009224  | -1.665082 | 1.498856  |
| Ti | 3.065395  | -2.716260 | 0.030881  |
| O  | 5.533760  | -0.703800 | 0.010052  |
| O  | 7.087910  | -1.984458 | -1.540986 |
| Ti | 6.314958  | -2.492529 | 0.027138  |
| O  | 4.786319  | -3.479352 | 0.012206  |

20b

E = -20001.593388 Hartree

|   |           |          |          |
|---|-----------|----------|----------|
| O | -3.235975 | 3.843754 | 0.082615 |
|---|-----------|----------|----------|

|    |           |           |           |
|----|-----------|-----------|-----------|
| O  | -0.295445 | -3.190381 | 3.068475  |
| Ti | -2.213553 | 2.565597  | 0.978116  |
| Ti | -0.828177 | -1.457332 | 3.391759  |
| O  | 0.233892  | -0.715601 | 4.677294  |
| O  | -1.861965 | -1.802214 | 1.357661  |
| O  | -3.187485 | 1.299076  | 1.818228  |
| O  | -0.371588 | 1.839226  | 0.787964  |
| O  | -1.347346 | 3.617091  | 2.219972  |
| O  | 0.514552  | 2.144865  | 3.935869  |
| O  | 1.654128  | 4.013035  | 1.562467  |
| Ti | 2.852880  | 2.923164  | 0.706728  |
| Ti | 0.338839  | 2.925910  | 2.263170  |
| O  | 4.286269  | 2.186479  | 1.575700  |
| O  | 2.062571  | 1.587208  | -0.561157 |
| O  | -1.817839 | 3.583421  | -2.650503 |
| O  | 3.357667  | 3.682513  | -0.917547 |
| O  | 0.950431  | 2.892822  | -2.677425 |
| O  | -5.049284 | -1.093789 | 1.847424  |
| Ti | -5.222251 | -1.494545 | 0.033204  |
| Ti | 0.846443  | 0.214586  | 0.373908  |
| Ti | -3.306139 | -0.526867 | 1.994869  |
| O  | -2.557319 | -0.868052 | 3.628292  |
| O  | -1.686850 | -4.170424 | 0.397668  |
| O  | -5.682165 | -0.428038 | -1.356353 |
| O  | -3.518278 | -0.688986 | -0.123128 |
| O  | -4.441718 | -3.082462 | -0.330828 |
| Ti | -3.283769 | 3.260527  | -1.644550 |
| O  | -4.598511 | 2.158628  | -2.244528 |
| Ti | -0.703622 | 2.110544  | -2.312648 |
| Ti | -4.042481 | 0.441323  | -1.744654 |
| O  | -2.387756 | 1.709737  | -1.015939 |
| O  | -3.056853 | -0.406895 | -2.910842 |
| O  | -0.965485 | 0.970929  | -3.567633 |
| Ti | 1.223629  | 0.491781  | 3.690438  |
| O  | 0.234469  | -0.373405 | 2.214050  |
| O  | 2.858854  | -0.474190 | 0.692642  |
| O  | 3.049428  | 0.185558  | 3.788661  |
| O  | 3.712620  | -3.092185 | 0.111097  |
| Ti | 3.763645  | 0.507410  | 2.140095  |
| O  | 5.138137  | -0.673854 | 1.668352  |
| Ti | 2.585109  | 2.498357  | -2.076045 |
| Ti | 4.384813  | -1.403606 | 0.181700  |
| O  | 5.012179  | -0.872744 | -1.469721 |
| O  | 1.841060  | 1.428596  | 1.847546  |
| O  | 3.622157  | 1.327773  | -3.076942 |
| Ti | -0.258958 | -3.438631 | 1.261881  |
| O  | 1.130579  | -4.538461 | 0.687645  |
| Ti | -2.605357 | -2.711600 | -0.203847 |
| Ti | 1.971274  | -3.379593 | -0.396389 |
| O  | -1.679715 | -2.267804 | -1.674625 |
| O  | 0.746115  | -2.094423 | 0.227949  |
| O  | 1.791302  | -3.684617 | -2.221047 |

|    |           |           |           |
|----|-----------|-----------|-----------|
| O  | 2.297731  | -1.017030 | -1.981295 |
| Ti | -1.130363 | -0.788253 | -2.651319 |
| Ti | 3.848096  | -0.459831 | -2.825042 |
| Ti | 1.775348  | -2.215231 | -3.288131 |
| O  | 3.343055  | -1.671220 | -4.130623 |
| O  | -0.178998 | 0.188164  | -1.218088 |
| O  | 0.096009  | -1.627297 | -3.720773 |

24a

E = -24002.003399 Hartree

|    |           |           |           |
|----|-----------|-----------|-----------|
| O  | -1.540436 | -1.513249 | 1.479461  |
| Ti | -1.602959 | -0.045294 | 2.557066  |
| O  | -3.210544 | -0.082945 | 3.462928  |
| O  | -1.576819 | -1.501607 | -1.410252 |
| Ti | -1.527154 | -2.614413 | 0.031822  |
| O  | -4.604662 | -1.521936 | 1.360301  |
| O  | -3.113589 | -3.581955 | 0.048242  |
| O  | -8.701657 | -1.922037 | -1.554877 |
| Ti | -7.872723 | -0.253026 | -1.798701 |
| Ti | -4.781467 | -0.215829 | -2.499214 |
| O  | -8.642698 | 1.281678  | -1.503125 |
| O  | -8.596138 | 1.334850  | 1.497756  |
| O  | -4.779499 | 1.157922  | -1.348577 |
| Ti | -8.380454 | 2.563764  | -0.029076 |
| Ti | -4.911222 | 2.410090  | -0.006429 |
| O  | -6.549513 | -0.237241 | -3.050463 |
| O  | -3.216167 | -0.125385 | -3.458904 |
| O  | -6.528222 | 3.132460  | -0.079469 |
| O  | -9.435625 | 3.799814  | -0.035572 |
| O  | -3.303204 | 3.347935  | -0.051921 |
| Ti | -4.776627 | -0.113744 | 2.501305  |
| Ti | -7.876038 | -0.221540 | 1.813706  |
| O  | -6.540721 | -0.258195 | 3.050810  |
| O  | -4.830025 | 1.374739  | 1.506575  |
| O  | -4.669855 | -1.740402 | -1.512179 |
| Ti | -4.721641 | -2.713383 | 0.007040  |
| O  | -7.155934 | -0.655844 | 0.012872  |
| O  | -8.737401 | -1.875617 | 1.584891  |
| Ti | -7.966543 | -2.430219 | 0.032003  |
| O  | -6.454184 | -3.442846 | 0.081736  |
| Ti | -1.607047 | -0.081146 | -2.556216 |
| O  | -1.666791 | 1.366040  | 1.413108  |
| O  | 0.002964  | 0.033510  | 3.443689  |
| O  | -1.638496 | 1.379163  | -1.480319 |
| Ti | -1.696042 | 2.486482  | -0.031785 |
| O  | 1.557747  | 1.513158  | 1.433555  |
| O  | -0.106681 | 3.424528  | -0.026551 |
| Ti | 1.604734  | 0.023829  | -2.559834 |
| O  | 1.654229  | -1.406996 | -1.443128 |
| Ti | 1.699429  | -2.502624 | 0.016771  |
| O  | -0.001421 | -0.049246 | -3.446614 |
| O  | 0.106998  | -3.436953 | 0.020403  |

|    |          |           |           |
|----|----------|-----------|-----------|
| Ti | 1.606754 | 0.074390  | 2.551812  |
| O  | 1.654771 | -1.368948 | 1.448983  |
| O  | 1.556786 | 1.474607  | -1.454437 |
| Ti | 1.526660 | 2.602492  | -0.024489 |
| O  | 3.212447 | 0.126653  | 3.460227  |
| O  | 4.626966 | 1.634724  | 1.415439  |
| O  | 3.106230 | 3.579852  | -0.033392 |
| O  | 8.710163 | 1.902563  | -1.583683 |
| Ti | 7.871690 | 0.235454  | -1.804967 |
| Ti | 4.778787 | 0.146885  | -2.508761 |
| O  | 8.627018 | -1.302218 | -1.484604 |
| O  | 8.614683 | -1.284680 | 1.517341  |
| O  | 4.798917 | -1.268175 | -1.411001 |
| Ti | 8.384802 | -2.549417 | 0.022641  |
| Ti | 4.916505 | -2.415349 | 0.019402  |
| O  | 6.547667 | 0.221501  | -3.055225 |
| O  | 3.211649 | 0.067967  | -3.466641 |
| O  | 6.536395 | -3.134751 | 0.012552  |
| O  | 9.448350 | -3.777879 | 0.034820  |
| O  | 3.310649 | -3.359113 | 0.026093  |
| Ti | 4.779478 | 0.182880  | 2.501779  |
| Ti | 7.871558 | 0.265057  | 1.808335  |
| O  | 6.544270 | 0.289373  | 3.055224  |
| O  | 4.817035 | -1.265140 | 1.448121  |
| O  | 4.641216 | 1.632907  | -1.467642 |
| Ti | 4.717685 | 2.717474  | -0.026498 |
| O  | 7.151927 | 0.667500  | -0.001372 |
| O  | 8.716887 | 1.924429  | 1.557646  |
| Ti | 7.960581 | 2.443423  | -0.015199 |
| O  | 6.447762 | 3.455841  | -0.019741 |

24b

E = -24001.9751773 Hartree

|    |           |           |           |
|----|-----------|-----------|-----------|
| Ti | 2.547724  | -4.260586 | 1.324459  |
| O  | 2.741110  | -5.472769 | -0.067413 |
| Ti | 2.533955  | -4.214395 | -1.418755 |
| O  | 2.291893  | -3.057636 | -0.022903 |
| O  | 0.918189  | -4.021437 | -2.278809 |
| O  | 0.946557  | -4.092198 | 2.224850  |
| O  | -0.001687 | -1.276818 | 2.231420  |
| Ti | -0.547003 | -3.105571 | 1.818945  |
| O  | -0.616330 | -3.231630 | 0.000660  |
| O  | 0.004008  | -1.224148 | -2.234659 |
| Ti | -0.579793 | -3.054605 | -1.812261 |
| O  | -2.065444 | -3.983875 | -2.441639 |
| O  | -2.374711 | -1.644682 | -1.569718 |
| O  | -2.420893 | -1.644032 | 1.603530  |
| O  | -2.037677 | -3.998421 | 2.467330  |
| O  | -3.707039 | -3.767954 | 0.018224  |
| Ti | -3.472326 | -3.096215 | 1.695109  |
| O  | -5.141925 | -2.494064 | 2.280482  |
| Ti | -3.474411 | -3.071697 | -1.651813 |

|    |           |           |           |
|----|-----------|-----------|-----------|
| O  | -5.130763 | -2.481149 | -2.273968 |
| Ti | -5.893597 | -1.057017 | -1.386666 |
| Ti | -5.888453 | -1.070314 | 1.379907  |
| O  | -5.785737 | 0.572781  | -2.250484 |
| Ti | -4.429988 | 1.772379  | -1.822463 |
| O  | -4.602797 | 1.770010  | -0.025059 |
| O  | -5.789850 | 0.571893  | 2.220382  |
| Ti | -4.440704 | 1.770550  | 1.775441  |
| O  | -4.684794 | -0.924211 | -0.006818 |
| O  | -4.050701 | 3.554738  | -2.190985 |
| O  | -2.911867 | 0.957905  | -2.416730 |
| Ti | -1.491247 | 0.042635  | -1.743740 |
| O  | -7.115699 | -1.294633 | -0.001661 |
| O  | -1.452505 | 0.409525  | 0.009591  |
| O  | -2.920633 | 0.972701  | 2.387265  |
| Ti | -1.507515 | 0.020979  | 1.757912  |
| O  | -4.069435 | 3.547454  | 2.158078  |
| O  | 4.052272  | -3.523316 | -2.220592 |
| Ti | 5.893000  | 1.038382  | 1.388256  |
| Ti | 5.888634  | 1.083297  | -1.378044 |
| O  | 5.792010  | -0.606220 | 2.223948  |
| Ti | 4.436130  | -1.795811 | 1.775514  |
| O  | 4.615458  | -1.776942 | -0.023033 |
| O  | 5.780788  | -0.539499 | -2.253759 |
| Ti | 4.436908  | -1.751056 | -1.820180 |
| O  | 4.684888  | 0.918870  | 0.005863  |
| O  | 4.067712  | -3.580222 | 2.132847  |
| O  | 2.918460  | -0.991485 | 2.386587  |
| Ti | 1.492422  | -0.056463 | 1.756424  |
| O  | 7.115580  | 1.291180  | 0.008098  |
| O  | 1.442721  | -0.406675 | 0.001507  |
| O  | 2.912051  | -0.942494 | -2.404357 |
| Ti | 1.502429  | -0.003983 | -1.744619 |
| Ti | 3.470687  | 3.056172  | 1.708611  |
| O  | 5.129305  | 2.444861  | 2.304838  |
| O  | 2.413576  | 1.659831  | -1.574593 |
| O  | 2.057415  | 4.019694  | -2.418333 |
| O  | 3.706468  | 3.766092  | 0.046148  |
| Ti | 3.476251  | 3.110454  | -1.638810 |
| O  | 5.143519  | 2.527249  | -2.245341 |
| O  | 2.379811  | 1.629955  | 1.598364  |
| Ti | -2.543467 | 4.248893  | -1.372774 |
| O  | -2.742870 | 5.474339  | 0.009817  |
| Ti | -2.538520 | 4.228863  | 1.370359  |
| O  | -2.287945 | 3.060211  | -0.010309 |
| O  | -0.938844 | 4.030759  | 2.265778  |
| O  | -0.924925 | 4.087895  | -2.237658 |
| O  | 0.001041  | 1.279460  | -2.210363 |
| Ti | 0.564167  | 3.106447  | -1.791596 |
| O  | 0.619315  | 3.234316  | 0.023132  |
| O  | -0.007278 | 1.226652  | 2.250609  |
| Ti | 0.564610  | 3.060017  | 1.840045  |

O 2.048502 3.964417 2.494371

24c

E = -24001.891891 Hartree

|    |           |           |           |
|----|-----------|-----------|-----------|
| O  | 1.812990  | 2.508265  | -2.716280 |
| Ti | 0.540197  | 1.497433  | -1.812894 |
| Ti | 2.348430  | -1.479345 | -1.877392 |
| O  | -0.683928 | 2.999227  | -1.326948 |
| O  | 0.993662  | 5.040156  | 0.443948  |
| O  | 1.042935  | 1.067740  | -0.121390 |
| Ti | -0.571486 | 4.004896  | 0.278166  |
| Ti | 0.787898  | 1.153049  | 1.708700  |
| O  | 0.865499  | -0.345591 | -2.494325 |
| O  | 3.222196  | -2.954340 | -2.254807 |
| O  | -0.543617 | 2.573774  | 1.494625  |
| O  | -2.109598 | 4.760527  | 0.562000  |
| Ti | 3.735450  | -3.541527 | -0.429607 |
| O  | 3.450468  | -3.621821 | 1.488172  |
| O  | 1.224451  | -0.700796 | 2.130398  |
| Ti | 2.624125  | -2.072000 | 1.754828  |
| O  | 2.903160  | -1.739339 | -0.061428 |
| O  | 4.506014  | 0.967408  | 0.461563  |
| Ti | 3.850159  | 2.553258  | 1.656180  |
| Ti | 2.768347  | 4.852053  | 0.204220  |
| O  | 3.845210  | 4.415517  | 1.641008  |
| O  | 2.250575  | 2.012327  | 2.358648  |
| O  | 5.084267  | 1.802710  | 2.751094  |
| O  | 3.928976  | -1.059293 | 2.572043  |
| O  | 5.464150  | -3.241311 | -0.483940 |
| O  | 6.598700  | -0.837801 | 1.384853  |
| Ti | 5.227671  | 0.066770  | 1.999739  |
| O  | 6.338504  | -0.335396 | -1.482922 |
| O  | 3.552630  | -0.113390 | -2.181355 |
| Ti | 6.821024  | -1.821902 | -0.303504 |
| Ti | 4.939043  | 0.708642  | -1.408633 |
| O  | 2.924754  | 3.025560  | -0.223669 |
| O  | 3.303261  | 5.101008  | -1.549176 |
| Ti | 3.307125  | 3.314426  | -2.047191 |
| O  | 8.339915  | -2.348033 | -0.540702 |
| O  | 4.864398  | 2.422305  | -2.186754 |
| O  | -3.923801 | 1.079160  | -2.569363 |
| Ti | -5.222808 | -0.050934 | -2.008069 |
| Ti | -3.847601 | -2.543650 | -1.679156 |
| O  | -6.592212 | 0.852145  | -1.386657 |
| O  | -5.462348 | 3.240025  | 0.507165  |
| O  | -4.503989 | -0.962574 | -0.475234 |
| Ti | -6.819668 | 1.823718  | 0.308382  |
| Ti | -4.939896 | -0.715804 | 1.395734  |
| O  | -5.076140 | -1.781948 | -2.772362 |
| O  | -3.839996 | -4.405649 | -1.677300 |
| O  | -6.339417 | 0.327173  | 1.475410  |
| O  | -8.338562 | 2.348255  | 0.547987  |

|    |           |           |           |
|----|-----------|-----------|-----------|
| Ti | -2.770314 | -4.851661 | -0.236567 |
| O  | -3.315240 | -5.110854 | 1.511441  |
| O  | -4.872830 | -2.435424 | 2.160197  |
| Ti | -3.315700 | -3.327072 | 2.021050  |
| O  | -2.928544 | -3.027721 | 0.200552  |
| O  | -1.044867 | -1.070105 | 0.133042  |
| Ti | -2.349768 | 1.467756  | 1.892306  |
| Ti | -3.733619 | 3.539910  | 0.456024  |
| O  | -3.221876 | 2.942009  | 2.277946  |
| O  | -3.555149 | 0.099838  | 2.179741  |
| O  | -0.866944 | 0.340391  | 2.510330  |
| O  | -1.826605 | -2.521749 | 2.702744  |
| O  | -0.992424 | -5.039579 | -0.452670 |
| O  | 0.682612  | -2.998189 | 1.342329  |
| Ti | -0.544790 | -1.500466 | 1.823263  |
| O  | 0.545362  | -2.577894 | -1.478686 |
| O  | -2.242599 | -2.004119 | -2.369983 |
| Ti | 0.572265  | -4.007233 | -0.260313 |
| Ti | -0.785456 | -1.153801 | -1.698328 |
| O  | -2.902309 | 1.739600  | 0.076781  |
| O  | -3.448222 | 3.630524  | -1.461480 |
| Ti | -2.620781 | 2.083042  | -1.736894 |
| O  | 2.112443  | -4.763109 | -0.532307 |
| O  | -1.225503 | 0.701595  | -2.114398 |

28a

E = -28002.385703 Hartree

|    |            |           |           |
|----|------------|-----------|-----------|
| Ti | -3.220922  | 0.005449  | -2.543728 |
| Ti | -3.292837  | 2.474361  | -0.013790 |
| O  | -1.610568  | -0.069065 | -3.425119 |
| O  | -1.687911  | 3.373677  | 0.133059  |
| O  | -0.010067  | 1.268271  | 1.299278  |
| O  | -3.115397  | -1.668345 | 1.559487  |
| Ti | -3.215415  | -0.136089 | 2.533375  |
| O  | -4.819205  | -0.144720 | 3.449490  |
| O  | -3.329382  | 1.185914  | 1.288065  |
| O  | -1.608653  | 0.019756  | 3.411901  |
| O  | 0.035474   | -1.603489 | 1.563134  |
| Ti | 0.005356   | -0.065691 | 2.534791  |
| O  | -1.537531  | -3.444477 | -0.127081 |
| O  | -3.259744  | -1.352671 | -1.317581 |
| Ti | 0.058597   | -2.533292 | -0.001279 |
| Ti | -3.162691  | -2.604548 | 0.006452  |
| O  | -6.161549  | -1.382522 | 1.196163  |
| O  | -4.753224  | -3.561744 | -0.017633 |
| O  | -10.288745 | -1.888157 | -1.610885 |
| Ti | -9.496773  | -0.192976 | -1.799698 |
| Ti | -6.385990  | -0.177133 | -2.475278 |
| O  | -10.315683 | 1.304323  | -1.459274 |
| O  | -10.176918 | 1.338395  | 1.540220  |
| O  | -6.293287  | 1.072043  | -1.190577 |
| Ti | -9.981068  | 2.571430  | 0.012731  |

|    |            |           |           |
|----|------------|-----------|-----------|
| Ti | -6.498911  | 2.403324  | 0.068182  |
| O  | -8.151693  | -0.061737 | -3.020309 |
| O  | -4.830591  | -0.043832 | -3.445211 |
| O  | -8.120030  | 3.100047  | -0.108650 |
| O  | -11.012837 | 3.829631  | 0.043350  |
| O  | -4.894859  | 3.350766  | 0.016707  |
| O  | -3.197101  | 1.532018  | -1.568321 |
| Ti | -6.380393  | -0.106043 | 2.478937  |
| Ti | -9.495577  | -0.244290 | 1.812394  |
| O  | -8.137178  | -0.361367 | 3.017531  |
| O  | -6.481804  | 1.477384  | 1.649860  |
| O  | -6.352142  | -1.801079 | -1.650081 |
| Ti | -6.346044  | -2.667596 | -0.069007 |
| O  | -8.783738  | -0.633876 | 0.002499  |
| O  | -10.384959 | -1.876946 | 1.534442  |
| Ti | -9.588818  | -2.410683 | -0.011627 |
| O  | -8.067228  | -3.404946 | 0.088827  |
| Ti | 6.382577   | 0.126816  | -2.478824 |
| Ti | 6.348377   | 2.668824  | 0.089110  |
| O  | 8.141336   | 0.380868  | -3.011214 |
| Ti | 9.497451   | 0.254776  | -1.804436 |
| O  | 10.388388  | 1.884253  | -1.511583 |
| O  | 8.072886   | 3.402652  | -0.052322 |
| Ti | 9.592821   | 2.404359  | 0.039537  |
| O  | 8.785251   | 0.629236  | 0.008568  |
| O  | 6.299631   | -1.080811 | 1.185170  |
| Ti | 6.385773   | 0.158770  | 2.478597  |
| O  | 4.828778   | 0.016714  | 3.445811  |
| O  | 6.345991   | 1.787432  | 1.662750  |
| O  | 8.150346   | 0.039255  | 3.026421  |
| O  | 10.293228  | 1.865196  | 1.632814  |
| O  | 10.178520  | -1.330194 | -1.545790 |
| O  | 10.309686  | -1.327969 | 1.454135  |
| Ti | 9.496618   | 0.170922  | 1.806660  |
| O  | 8.116946   | -3.105801 | 0.080489  |
| O  | 6.476587   | -1.462929 | -1.658309 |
| Ti | 9.979155   | -2.579538 | -0.032233 |
| Ti | 6.496871   | -2.403365 | -0.084305 |
| O  | 3.192264   | -1.494997 | 1.517976  |
| O  | 11.007727  | -3.837628 | -0.075397 |
| O  | 4.893408   | -3.351496 | -0.024896 |
| Ti | -0.007083  | 0.069982  | -2.539192 |
| Ti | 3.217862   | 0.139680  | -2.545191 |
| O  | -0.040684  | 1.606298  | -1.567205 |
| O  | 3.116766   | 1.640329  | -1.519550 |
| Ti | -0.060402  | 2.538184  | -0.002951 |
| Ti | 3.161753   | 2.613753  | 0.012042  |
| O  | 1.607265   | -0.002340 | -3.419005 |
| O  | 4.824067   | 0.182288  | -3.453016 |
| O  | 1.535109   | 3.452708  | 0.119492  |
| O  | 4.756091   | 3.564467  | 0.031308  |
| O  | 6.170196   | 1.395527  | -1.187483 |



|    |          |           |           |
|----|----------|-----------|-----------|
| Ti | 3.218033 | -0.002328 | 2.544916  |
| O  | 1.607705 | 0.054045  | 3.427421  |
| O  | 3.251750 | 1.390295  | 1.360925  |
| O  | 3.340942 | -1.225710 | -1.350918 |
| Ti | 3.292497 | -2.475535 | -0.014024 |
| O  | 0.009383 | -1.255681 | -1.294808 |
| O  | 1.684744 | -3.373449 | -0.141021 |

28b

E = -28002.3085891 Hartree

|    |           |           |           |
|----|-----------|-----------|-----------|
| O  | -1.550365 | 3.550087  | -2.506704 |
| O  | -1.484146 | 1.386995  | 1.926191  |
| Ti | -1.692612 | 3.135851  | 1.482043  |
| O  | 0.371061  | -4.016355 | -2.444044 |
| Ti | -1.042441 | -0.177527 | 1.087481  |
| O  | -0.741829 | -1.673657 | 2.113374  |
| O  | -0.844124 | -0.245819 | -0.797052 |
| Ti | -0.087877 | -3.331903 | 1.795078  |
| O  | 0.098171  | -3.421676 | -0.057268 |
| O  | -2.975030 | 2.844043  | -0.092797 |
| Ti | -3.044027 | 2.644003  | -1.922462 |
| O  | -3.258500 | 3.654339  | 2.291992  |
| O  | -2.912353 | -0.676049 | 0.510053  |
| Ti | -2.691529 | -0.731365 | -1.433934 |
| O  | -3.792127 | -2.606702 | 2.526869  |
| O  | -4.645371 | 3.261363  | -2.584358 |
| O  | -5.711303 | 3.712589  | 0.047155  |
| O  | -5.716410 | -0.561388 | 3.028689  |
| Ti | -4.487172 | -1.095989 | 1.719342  |
| O  | -5.601932 | -1.840056 | 0.531527  |
| O  | -7.317707 | -1.128416 | -1.644814 |
| Ti | -5.812064 | -2.146024 | -1.266643 |
| O  | -4.399246 | -1.330534 | -1.928074 |
| O  | -2.791924 | 0.883347  | -2.286091 |
| Ti | -6.107830 | 2.894836  | -1.521735 |
| Ti | -7.421605 | 0.581006  | -0.920870 |
| O  | -7.849160 | 2.190225  | -1.721276 |
| O  | -5.701019 | 1.174140  | -1.084121 |
| O  | -4.821491 | 1.010048  | 1.315808  |
| Ti | -4.678453 | 2.930175  | 1.391766  |
| O  | -7.626769 | 0.660773  | 0.914420  |
| Ti | -6.416407 | 0.950823  | 2.273401  |
| O  | -6.039662 | 2.699284  | 2.651865  |
| Ti | -3.100170 | -4.090317 | 1.748034  |
| O  | -4.090203 | -5.409457 | 0.911537  |
| Ti | -3.894214 | -4.785675 | -0.824753 |
| Ti | -1.206515 | -3.752362 | -1.579649 |
| O  | -1.420447 | -4.493604 | 2.312784  |
| O  | -2.452976 | -5.139212 | -1.885136 |
| O  | -5.383790 | -3.969262 | -1.467292 |
| O  | -1.843989 | -2.215870 | -2.227464 |
| O  | -2.786890 | -3.480348 | 0.007486  |

|    |           |           |           |
|----|-----------|-----------|-----------|
| O  | 2.787909  | 3.482040  | -0.021776 |
| O  | 1.418256  | 4.483261  | -2.321274 |
| O  | 4.092263  | 5.407652  | -0.932986 |
| Ti | 3.102476  | 4.085750  | -1.765597 |
| O  | 2.452287  | 5.149387  | 1.865371  |
| O  | 1.846552  | 2.227466  | 2.227389  |
| Ti | 3.893531  | 4.789784  | 0.804967  |
| Ti | 1.205446  | 3.761153  | 1.574779  |
| O  | 5.380921  | 3.970464  | 1.447839  |
| Ti | 6.110825  | -2.883101 | 1.530563  |
| Ti | 4.681293  | -2.940891 | -1.382987 |
| O  | 7.852240  | -2.178191 | 1.727290  |
| Ti | 7.425362  | -0.573368 | 0.917306  |
| O  | 7.627150  | -0.663974 | -0.918206 |
| O  | 6.034122  | -2.707089 | -2.649856 |
| Ti | 6.410797  | -0.957835 | -2.271614 |
| O  | 4.816484  | -1.018287 | -1.311841 |
| O  | 5.708400  | 0.548583  | -3.032870 |
| O  | 7.322525  | 1.138138  | 1.636668  |
| O  | 5.705044  | -1.165128 | 1.083469  |
| Ti | 5.810262  | 2.146099  | 1.259547  |
| O  | 4.648056  | -3.244662 | 2.593540  |
| O  | 3.257621  | -3.670865 | -2.273559 |
| O  | 5.716573  | -3.710635 | -0.035040 |
| Ti | 2.687559  | 0.741360  | 1.435766  |
| O  | 4.401894  | 1.330665  | 1.927719  |
| O  | 5.600808  | 1.828171  | -0.537415 |
| O  | 3.790727  | 2.596714  | -2.535276 |
| Ti | 4.481433  | 1.085983  | -1.721184 |
| O  | 2.800871  | -0.870824 | 2.295154  |
| O  | 2.907620  | 0.680517  | -0.507614 |
| Ti | 3.044652  | -2.631207 | 1.931910  |
| O  | 2.974620  | -2.839959 | 0.104070  |
| O  | -0.096505 | 3.411757  | 0.062813  |
| Ti | 0.089937  | 3.324354  | -1.788689 |
| O  | -0.369278 | 4.023012  | 2.445920  |
| O  | 0.846843  | 0.230767  | 0.807307  |
| Ti | 1.041777  | 0.169549  | -1.081626 |
| O  | 0.731278  | 1.662158  | -2.111582 |
| Ti | 1.693553  | -3.139456 | -1.469100 |
| O  | 1.551650  | -3.540553 | 2.518081  |
| O  | 1.493638  | -1.389605 | -1.919724 |

30a

E = -30002.511951 Hartree

|    |           |           |           |
|----|-----------|-----------|-----------|
| O  | 2.904387  | 4.037543  | 2.520581  |
| O  | 0.100059  | 0.874997  | -0.026615 |
| O  | 1.722002  | 1.285962  | 2.257097  |
| Ti | -0.164385 | -0.417877 | 1.250100  |
| O  | 1.338510  | -1.245780 | 1.989719  |
| O  | 0.305054  | -3.795660 | 2.369357  |
| Ti | -4.544081 | -4.196277 | 1.396599  |

|    |           |           |           |
|----|-----------|-----------|-----------|
| O  | -4.800070 | -5.276856 | -0.079365 |
| Ti | -4.418070 | -3.954580 | -1.345334 |
| O  | -4.085052 | -2.933175 | 0.160293  |
| O  | -2.981774 | -4.316011 | 2.375814  |
| O  | -1.657561 | -1.602156 | 1.916967  |
| Ti | -1.429305 | -3.478273 | 1.797446  |
| O  | -1.342521 | -3.848532 | 0.074360  |
| Ti | 1.425396  | 3.061793  | 1.956005  |
| O  | -0.269509 | 3.405414  | 2.567547  |
| Ti | -1.845745 | 3.131610  | -1.720928 |
| O  | -1.790767 | 3.206888  | 0.106153  |
| O  | -1.446835 | 0.857807  | 2.139227  |
| Ti | -1.858099 | 2.797023  | 1.881259  |
| O  | -3.231085 | 3.864168  | 2.578410  |
| O  | -3.738768 | 1.647267  | 1.535602  |
| O  | -3.711828 | 1.902693  | -1.565437 |
| O  | -3.224155 | 4.245239  | -2.305726 |
| O  | -4.892948 | 4.006913  | 0.124143  |
| Ti | -4.712344 | 3.407996  | -1.586355 |
| O  | -6.406396 | 2.959967  | -2.233900 |
| Ti | -4.713024 | 3.169902  | 1.735030  |
| O  | -6.416718 | 2.730615  | 2.348534  |
| Ti | -7.323701 | 1.456596  | 1.377018  |
| Ti | -7.313470 | 1.595959  | -1.386126 |
| O  | -7.369428 | -0.216223 | 2.155274  |
| Ti | -6.123684 | -1.521035 | 1.715587  |
| O  | -6.230808 | -1.404521 | -0.092704 |
| O  | -7.382954 | -0.022908 | -2.266301 |
| Ti | -6.111430 | -1.333595 | -1.888070 |
| O  | -6.124901 | 1.287422  | -0.011126 |
| O  | -5.834191 | -3.139266 | -2.207812 |
| O  | -6.021182 | -3.318406 | 2.125120  |
| O  | -4.538213 | -0.891145 | 2.378260  |
| Ti | -3.062173 | -0.141444 | 1.638713  |
| O  | -8.512381 | 1.882844  | 0.008125  |
| O  | -3.019475 | -0.371986 | -0.144542 |
| O  | -4.550659 | -0.616161 | -2.507315 |
| Ti | -3.017166 | 0.126339  | -1.874256 |
| Ti | 7.304424  | -1.365784 | -1.483618 |
| Ti | 7.338925  | -1.524135 | 1.277991  |
| O  | 7.346216  | 0.319395  | -2.235544 |
| Ti | 6.093066  | 1.588083  | -1.721975 |
| O  | 6.254355  | 1.469983  | 0.068464  |
| O  | 7.387799  | 0.063643  | 2.208791  |
| Ti | 6.112716  | 1.377045  | 1.870844  |
| O  | 6.125535  | -1.213238 | -0.075892 |
| O  | 5.926942  | 3.153409  | 2.366619  |
| O  | 5.917940  | 3.411340  | -1.986295 |
| O  | 4.506255  | 0.934311  | -2.373284 |
| Ti | 2.995340  | 0.138115  | -1.765702 |
| O  | 8.518331  | -1.789919 | -0.143438 |
| O  | 3.031957  | 0.405147  | 0.002245  |

|    |           |           |           |
|----|-----------|-----------|-----------|
| O  | 4.536241  | 0.651173  | 2.405817  |
| Ti | 2.979799  | -0.030287 | 1.732871  |
| Ti | 4.727367  | -3.156036 | -1.827732 |
| O  | 6.397673  | -2.638257 | -2.462717 |
| O  | 3.675873  | -1.868503 | 1.531192  |
| O  | 3.329933  | -4.237695 | 2.259052  |
| O  | 4.952187  | -3.941465 | -0.206167 |
| Ti | 4.750612  | -3.329339 | 1.508256  |
| O  | 6.451729  | -2.890109 | 2.132914  |
| O  | 3.692115  | -1.691182 | -1.590649 |
| Ti | -1.283007 | -2.906769 | -1.549514 |
| O  | 0.199680  | -3.479460 | -2.397239 |
| Ti | 1.903180  | -3.168146 | 1.698537  |
| O  | 1.873442  | -3.360507 | -0.102345 |
| O  | 1.451512  | -1.003868 | -2.341849 |
| Ti | 1.885059  | -2.901729 | -1.881312 |
| O  | 3.224429  | -3.921638 | -2.630485 |
| Ti | 4.509845  | 4.243431  | -1.119454 |
| O  | 4.850736  | 5.365443  | 0.321853  |
| Ti | 4.506273  | 4.085579  | 1.626990  |
| O  | 4.110682  | 3.023406  | 0.183866  |
| O  | 2.918963  | 4.259224  | -2.045099 |
| O  | 1.585418  | 1.462514  | -2.110369 |
| Ti | 1.419599  | 3.267902  | -1.613758 |
| O  | 1.309099  | 3.425571  | 0.177806  |
| O  | -1.403138 | 1.308668  | -2.275804 |
| O  | -0.206827 | 3.813015  | -2.226105 |
| O  | -2.821703 | -3.747809 | -2.195235 |
| O  | -0.272819 | -1.473470 | -0.346541 |
| O  | -1.608614 | -1.123698 | -2.344769 |
| Ti | -0.050747 | 0.020707  | -1.647671 |

30b

E = -30002.4831938 Hartree

|    |           |           |           |
|----|-----------|-----------|-----------|
| Ti | -4.754500 | -3.770670 | -1.338975 |
| Ti | -4.678865 | -2.245485 | 1.630967  |
| O  | -6.506861 | -3.273693 | -1.811970 |
| Ti | -7.293466 | -1.807070 | -1.066629 |
| O  | -8.515034 | -1.989435 | 0.310372  |
| O  | -6.215805 | -2.475969 | 2.622285  |
| Ti | -7.441282 | -1.447316 | 1.725237  |
| O  | -6.108400 | -1.265920 | 0.369858  |
| O  | -7.398128 | 0.242094  | 2.326226  |
| O  | -7.366593 | -0.323676 | -2.076715 |
| O  | -3.759532 | -2.321639 | -1.811866 |
| Ti | -6.192968 | 1.134087  | -1.754142 |
| O  | -3.326305 | -4.778234 | -1.903053 |
| O  | -3.123181 | -2.642021 | 2.451693  |
| O  | -4.760327 | -3.663522 | 0.457478  |
| Ti | -3.093645 | -0.555540 | -1.491434 |
| Ti | -2.980823 | 0.440346  | 1.766692  |
| O  | -4.514814 | 0.370530  | -2.013909 |

|    |           |           |           |
|----|-----------|-----------|-----------|
| O  | -6.415436 | 1.485774  | 0.013554  |
| O  | -4.563761 | -0.085560 | 2.488300  |
| Ti | -5.917829 | 1.254991  | 1.746402  |
| O  | -1.544055 | 3.671589  | -0.174752 |
| O  | -3.937419 | 1.906389  | 1.017668  |
| O  | -2.921536 | 4.285508  | 2.243366  |
| O  | -5.861154 | 2.946405  | 2.367787  |
| O  | -6.107145 | 2.688673  | -2.561185 |
| O  | -4.818495 | 4.359189  | -0.197351 |
| Ti | -4.442871 | 3.687600  | 1.371201  |
| O  | -3.026863 | 3.439978  | -2.575223 |
| O  | -1.766120 | 0.827925  | -1.638581 |
| Ti | -4.829609 | 4.110616  | -2.144607 |
| Ti | -1.642401 | 2.765002  | -1.762087 |
| O  | -5.181804 | 5.498435  | -2.914605 |
| O  | 0.063329  | 3.037342  | -2.452949 |
| O  | -1.446318 | -1.580679 | -2.147391 |
| O  | -3.195417 | -0.821297 | 0.383131  |
| Ti | 1.337997  | -3.632341 | -1.558459 |
| Ti | -1.923850 | -3.530247 | -1.685090 |
| O  | -1.748421 | -3.413541 | 0.070968  |
| Ti | -1.479931 | -2.346750 | 1.615937  |
| O  | -0.277440 | -4.192893 | -2.202579 |
| O  | -0.351244 | -1.149417 | 0.287863  |
| O  | 1.382956  | -1.783078 | -1.804292 |
| Ti | -0.091255 | -0.459838 | -1.423756 |
| O  | 1.394473  | 0.513942  | -2.372878 |
| O  | -0.080833 | -3.034208 | 2.506986  |
| Ti | 0.083023  | 0.457865  | 1.466684  |
| O  | -1.422816 | -0.522830 | 2.402690  |
| O  | 1.755718  | 3.402439  | -0.040289 |
| Ti | 1.927057  | 3.519835  | 1.718033  |
| O  | -1.385357 | 1.775914  | 1.851970  |
| O  | 0.285679  | 4.190209  | 2.238895  |
| Ti | -1.338407 | 3.626501  | 1.614467  |
| O  | 0.343436  | 1.144567  | -0.243444 |
| Ti | 1.467770  | 2.340317  | -1.578074 |
| O  | 3.089538  | 2.627294  | -2.456942 |
| O  | 3.163448  | 0.810771  | -0.367857 |
| O  | 5.849209  | -2.957062 | -2.384522 |
| Ti | 4.452842  | -3.690913 | -1.347243 |
| O  | 4.835510  | -4.331069 | 0.234417  |
| O  | 6.149733  | -2.654700 | 2.546293  |
| O  | 1.525008  | -3.670120 | 0.233650  |
| Ti | 4.844454  | -4.068021 | 2.180264  |
| Ti | 1.631595  | -2.764567 | 1.818925  |
| O  | 2.917979  | -4.304428 | -2.179489 |
| O  | 3.037151  | -3.415255 | 2.619103  |
| O  | 5.205781  | -5.447208 | 2.960211  |
| Ti | 3.095630  | 0.545168  | 1.504599  |
| O  | 1.763357  | -0.832505 | 1.687857  |
| O  | 3.945776  | -1.905726 | -1.020568 |

|    |          |           |           |
|----|----------|-----------|-----------|
| Ti | 2.962514 | -0.446546 | -1.748814 |
| O  | 4.536877 | 0.092932  | -2.489850 |
| O  | 3.336756 | 4.765159  | 1.905203  |
| O  | 4.729886 | 3.626117  | -0.470270 |
| O  | 7.371065 | -0.241889 | -2.404748 |
| Ti | 5.912682 | -1.260543 | -1.779579 |
| O  | 6.448461 | -1.492597 | -0.060840 |
| O  | 7.399937 | 0.347021  | 2.001669  |
| Ti | 6.229633 | -1.118481 | 1.704612  |
| O  | 4.540282 | -0.378099 | 1.962552  |
| O  | 1.447328 | 1.576804  | 2.176159  |
| Ti | 4.753002 | 3.750004  | 1.322836  |
| Ti | 7.317317 | 1.822699  | 0.981074  |
| O  | 6.527628 | 3.276425  | 1.742191  |
| O  | 3.768041 | 2.304945  | 1.835510  |
| O  | 6.117080 | 1.263340  | -0.434456 |
| Ti | 4.664570 | 2.230323  | -1.676028 |
| O  | 8.517897 | 2.004300  | -0.419477 |
| Ti | 7.426376 | 1.451400  | -1.813108 |
| O  | 6.184210 | 2.487081  | -2.683595 |

30c

E = -30002.473960 Hartree

|    |           |           |           |
|----|-----------|-----------|-----------|
| O  | 3.153002  | 4.843026  | 1.566148  |
| O  | 1.555045  | -0.185163 | 2.273228  |
| O  | 1.461436  | 2.098304  | 1.645931  |
| Ti | -1.589366 | 3.915900  | 1.204108  |
| Ti | 1.602261  | 3.913468  | 1.139950  |
| O  | 0.012100  | 4.671419  | 1.661451  |
| O  | -1.488515 | 2.145532  | 1.806364  |
| Ti | 0.061373  | 0.693664  | 1.425604  |
| Ti | 4.664924  | 3.914081  | 1.038222  |
| Ti | 4.473483  | 2.360094  | -1.752884 |
| O  | 6.524915  | 3.674204  | 1.380162  |
| Ti | 7.177834  | 2.072103  | 0.855297  |
| O  | 8.334892  | 1.954293  | -0.591759 |
| O  | 5.980937  | 2.084306  | -2.827086 |
| Ti | 7.169146  | 1.158876  | -1.804762 |
| O  | 5.929753  | 1.334993  | -0.403414 |
| O  | 7.237556  | -0.620573 | -2.235802 |
| O  | 7.278242  | 0.786492  | 2.156211  |
| O  | 4.070486  | 2.326123  | 1.496909  |
| Ti | 6.229055  | -0.738023 | 1.939438  |
| O  | 4.638734  | 3.878811  | -0.797592 |
| Ti | 3.055789  | 0.711071  | 1.269371  |
| Ti | 2.846548  | -0.737785 | -1.476402 |
| O  | 4.508632  | -0.173423 | 1.967370  |
| O  | 6.724129  | -1.277294 | 0.304407  |
| O  | 4.499035  | -1.140913 | -2.067817 |
| Ti | 6.102559  | -1.794908 | -1.353893 |
| O  | 2.624167  | -0.996948 | 0.299708  |
| O  | 6.186169  | -3.615480 | -1.614183 |

|    |           |           |           |
|----|-----------|-----------|-----------|
| O  | 6.009578  | -2.415733 | 2.742945  |
| O  | 4.543703  | -2.757459 | 0.201988  |
| O  | 3.024947  | -2.854033 | 2.663452  |
| Ti | 4.641931  | -3.353228 | 1.988232  |
| Ti | 1.571817  | -2.156743 | 1.773628  |
| O  | 4.976592  | -4.989498 | 1.160323  |
| O  | 3.206127  | 1.147138  | -0.736652 |
| O  | 1.585939  | 3.592389  | -0.618121 |
| O  | -3.021130 | -2.599778 | 2.797889  |
| Ti | -1.483331 | -2.180038 | 1.841459  |
| O  | -0.098730 | -1.134702 | 0.461918  |
| O  | 0.063315  | -2.574168 | 2.720824  |
| O  | -1.409715 | -0.202239 | 2.355907  |
| Ti | 4.829301  | -4.389611 | -0.590155 |
| O  | 1.507785  | -3.585461 | 0.537383  |
| O  | 3.268850  | -4.713964 | -1.466051 |
| O  | -3.130970 | -4.823088 | -1.609048 |
| O  | -1.561595 | 0.201861  | -2.270385 |
| O  | -1.446107 | -2.088147 | -1.658511 |
| Ti | 1.599530  | -3.908829 | -1.184943 |
| Ti | -1.583507 | -3.900946 | -1.156441 |
| O  | 0.006831  | -4.668603 | -1.663124 |
| O  | 1.494872  | -2.141584 | -1.796030 |
| Ti | -0.063572 | -0.681677 | -1.428706 |
| Ti | -4.645879 | -3.899539 | -1.084430 |
| Ti | -4.470828 | -2.372155 | 1.722034  |
| O  | -6.506813 | -3.672802 | -1.426729 |
| Ti | -7.169205 | -2.079694 | -0.885993 |
| O  | -8.330520 | -1.988649 | 0.558659  |
| O  | -5.984577 | -2.128734 | 2.796775  |
| Ti | -7.172761 | -1.198127 | 1.785131  |
| O  | -5.928550 | -1.347557 | 0.383983  |
| O  | -7.243458 | 0.575055  | 2.240973  |
| O  | -7.275678 | -0.777691 | -2.169095 |
| O  | -4.061854 | -2.304546 | -1.533010 |
| Ti | -6.239821 | 0.752599  | -1.928909 |
| O  | -4.617714 | -3.880061 | 0.749834  |
| Ti | -3.057407 | -0.693048 | -1.275780 |
| Ti | -2.846952 | 0.733994  | 1.480011  |
| O  | -4.514733 | 0.199974  | -1.961144 |
| O  | -6.736013 | 1.268341  | -0.287659 |
| O  | -4.504718 | 1.107128  | 2.081493  |
| Ti | -6.111666 | 1.765512  | 1.377045  |
| O  | -2.625000 | 1.014849  | -0.292994 |
| O  | -6.193226 | 3.581812  | 1.666463  |
| O  | -6.024334 | 2.440874  | -2.710819 |
| O  | -4.558031 | 2.752146  | -0.165342 |
| O  | -3.040323 | 2.879919  | -2.629782 |
| Ti | -4.658653 | 3.367387  | -1.944727 |
| Ti | -1.577780 | 2.176188  | -1.762640 |
| O  | -4.999938 | 4.992895  | -1.095885 |
| O  | -3.199210 | -1.144492 | 0.719564  |

|    |           |           |           |
|----|-----------|-----------|-----------|
| O  | -1.576660 | -3.587794 | 0.602332  |
| O  | -0.071952 | 2.583454  | -2.716762 |
| O  | 1.404570  | 0.203482  | -2.360501 |
| Ti | -4.841038 | 4.375210  | 0.646986  |
| O  | 3.017707  | 2.589051  | -2.820172 |
| Ti | 1.483629  | 2.181858  | -1.854070 |
| O  | 0.100249  | 1.143014  | -0.461949 |
| O  | -1.503439 | 3.598337  | -0.520058 |
| O  | -3.269678 | 4.700306  | 1.501985  |

32a

E = -32002.769752 Hartree

|    |           |           |           |
|----|-----------|-----------|-----------|
| O  | 4.781266  | 1.540149  | 1.467633  |
| Ti | 4.820905  | 0.078410  | 2.558975  |
| O  | 6.430229  | 0.107288  | 3.464343  |
| O  | 4.812584  | 1.514518  | -1.417697 |
| Ti | 4.786263  | 2.635742  | 0.016260  |
| O  | 7.848307  | 1.539345  | 1.370579  |
| O  | 6.381766  | 3.586014  | 0.020664  |
| O  | 11.946294 | 1.847201  | -1.576052 |
| Ti | 11.092386 | 0.188613  | -1.806906 |
| Ti | 7.996419  | 0.172771  | -2.502176 |
| O  | 11.839313 | -1.355252 | -1.499053 |
| O  | 11.800869 | -1.381085 | 1.501487  |
| O  | 7.976073  | -1.205279 | -1.358397 |
| Ti | 11.564121 | -2.621387 | -0.013651 |
| Ti | 8.095725  | -2.429460 | 0.009184  |
| O  | 9.765228  | 0.178112  | -3.053909 |
| O  | 6.427959  | 0.104496  | -3.458472 |
| O  | 9.705519  | -3.169562 | -0.050501 |
| O  | 12.605456 | -3.869143 | -0.011871 |
| O  | 6.479393  | -3.352300 | -0.018735 |
| Ti | 7.997558  | 0.122511  | 2.504260  |
| Ti | 11.096001 | 0.183810  | 1.807409  |
| O  | 9.765505  | 0.237723  | 3.049610  |
| O  | 8.027573  | -1.359677 | 1.499805  |
| O  | 7.902479  | 1.694636  | -1.508423 |
| Ti | 7.979316  | 2.696709  | -0.009737 |
| O  | 10.383068 | 0.614764  | 0.002091  |
| O  | 11.979081 | 1.825101  | 1.566705  |
| Ti | 11.219377 | 2.377255  | 0.007293  |
| O  | 9.719638  | 3.408913  | 0.042996  |
| Ti | 4.820182  | 0.082472  | -2.551632 |
| O  | 4.859689  | -1.345489 | 1.431739  |
| O  | 3.213895  | 0.034322  | 3.444150  |
| O  | 4.834467  | -1.367428 | -1.460330 |
| Ti | 4.878910  | -2.474184 | -0.007533 |
| O  | 1.627334  | -1.415444 | 1.432847  |
| O  | 3.277274  | -3.384268 | 0.003361  |
| Ti | 1.606561  | 0.025899  | -2.549950 |
| O  | 1.581435  | 1.461041  | -1.431235 |
| Ti | 1.564278  | 2.572710  | 0.007707  |



|    |            |           |           |
|----|------------|-----------|-----------|
| O  | 3.214212   | 0.071097  | -3.440191 |
| O  | 3.163658   | 3.487639  | 0.000505  |
| Ti | 1.606961   | 0.017920  | 2.551052  |
| O  | 1.582123   | 1.470501  | 1.454364  |
| O  | 1.630492   | -1.425519 | -1.455206 |
| Ti | 1.654565   | -2.528939 | -0.007211 |
| O  | 0.000034   | -0.013755 | 3.440293  |
| O  | -1.587342  | -1.478979 | 1.438163  |
| O  | 0.056790   | -3.442681 | -0.006236 |
| Ti | -1.607175  | -0.026266 | -2.551739 |
| O  | -1.635420  | 1.412552  | -1.440819 |
| Ti | -1.654703  | 2.518922  | 0.004860  |
| O  | 0.000262   | 0.005673  | -3.441255 |
| O  | -0.057220  | 3.433408  | 0.005188  |
| Ti | -1.606746  | -0.037660 | 2.549536  |
| O  | -1.635117  | 1.408080  | 1.447306  |
| O  | -1.585425  | -1.473847 | -1.448525 |
| Ti | -1.565848  | -2.582988 | -0.007012 |
| O  | -4.852566  | 1.341944  | 1.444744  |
| Ti | -4.819778  | -0.095521 | 2.554492  |
| O  | -3.213262  | -0.066976 | 3.441835  |
| O  | -4.847177  | 1.360580  | -1.449452 |
| Ti | -4.876503  | 2.467973  | 0.004089  |
| O  | -3.274729  | 3.377860  | 0.008680  |
| O  | -3.213668  | -0.052616 | -3.444684 |
| O  | -3.167013  | -3.495299 | -0.013065 |
| Ti | -4.820811  | -0.076510 | -2.557972 |
| O  | -4.794087  | -1.542867 | 1.442761  |
| O  | -6.427432  | -0.120826 | 3.462014  |
| O  | -4.802283  | -1.524211 | -1.444981 |
| Ti | -4.788584  | -2.640798 | -0.007635 |
| O  | -7.864695  | -1.592378 | 1.408107  |
| O  | -6.385871  | -3.588065 | -0.009519 |
| O  | -11.957826 | -1.821023 | -1.577512 |
| Ti | -11.092148 | -0.168439 | -1.805277 |
| Ti | -7.997395  | -0.143916 | -2.507148 |
| O  | -11.825443 | 1.381144  | -1.491936 |
| O  | -11.807748 | 1.380974  | 1.509764  |
| O  | -7.989178  | 1.263024  | -1.399596 |
| Ti | -11.559269 | 2.633623  | 0.007090  |
| Ti | -8.091673  | 2.435980  | 0.011686  |
| O  | -9.767400  | -0.175766 | -3.054942 |
| O  | -6.429048  | -0.093199 | -3.464858 |
| O  | -9.700593  | 3.180176  | -0.008367 |
| O  | -12.598571 | 3.883282  | 0.014427  |
| O  | -6.472396  | 3.353667  | 0.004460  |
| Ti | -7.996158  | -0.145140 | 2.504201  |
| Ti | -11.093714 | -0.180640 | 1.809068  |
| O  | -9.764500  | -0.224698 | 3.053149  |
| O  | -8.008555  | 1.309125  | 1.459849  |
| O  | -7.888447  | -1.638403 | -1.474242 |
| Ti | -7.982600  | -2.696361 | -0.015153 |

|    |            |           |           |
|----|------------|-----------|-----------|
| O  | -10.382112 | -0.604065 | 0.001022  |
| O  | -11.970913 | -1.824545 | 1.565045  |
| Ti | -11.221798 | -2.365479 | -0.003771 |
| O  | -9.725944  | -3.403196 | 0.003056  |

32b

E = -32002.768716 Hartree

|    |           |           |           |
|----|-----------|-----------|-----------|
| Ti | -1.428709 | 4.526929  | 1.788888  |
| O  | -1.633945 | 4.476099  | -0.015092 |
| O  | -3.162906 | 4.444501  | -2.435450 |
| Ti | -1.415063 | 4.533690  | -1.817060 |
| O  | -0.133273 | 5.828791  | -2.139908 |
| O  | -0.154105 | 5.825065  | 2.117566  |
| O  | -0.529343 | 3.031973  | 2.326234  |
| Ti | 0.329152  | 1.513684  | 1.808119  |
| O  | 0.267140  | 1.538315  | -0.002548 |
| O  | -0.513345 | 3.039682  | -2.350570 |
| Ti | 0.344439  | 1.526394  | -1.814508 |
| O  | 1.134307  | -0.312475 | -2.277873 |
| O  | 1.123013  | -0.332609 | 2.255340  |
| Ti | 1.517752  | 5.587694  | 1.362361  |
| O  | 1.982669  | 6.747959  | -0.001905 |
| Ti | 1.533745  | 5.588831  | -1.373886 |
| O  | 1.144664  | 4.431173  | -0.007785 |
| O  | 2.872716  | 4.697372  | -2.272260 |
| O  | 2.842614  | 4.692475  | 2.278464  |
| O  | 2.217824  | 1.867958  | 2.138563  |
| Ti | 3.685528  | 3.123121  | 1.807814  |
| O  | 3.870660  | 3.343788  | 0.008556  |
| O  | 2.234043  | 1.884304  | -2.125776 |
| Ti | 3.721166  | 3.131045  | -1.790459 |
| O  | 5.479439  | 3.139461  | -2.428156 |
| O  | 4.503160  | 1.020210  | -1.548765 |
| O  | 4.483237  | 1.001675  | 1.512808  |
| O  | 5.416447  | 3.103839  | 2.503146  |
| O  | 6.771338  | 2.007090  | 0.040823  |
| Ti | 6.164806  | 1.593267  | 1.713313  |
| O  | 7.127257  | 0.119190  | 2.331297  |
| Ti | 6.199285  | 1.611922  | -1.648052 |
| O  | 7.184259  | 0.144297  | -2.249745 |
| Ti | 7.067918  | -1.465683 | -1.347513 |
| Ti | 7.039269  | -1.480015 | 1.405481  |
| O  | 6.177937  | -2.886251 | -2.122689 |
| Ti | 4.361185  | -3.137878 | -1.818471 |
| O  | 4.196344  | -3.223776 | -0.007317 |
| O  | 6.144854  | -2.916101 | 2.146465  |
| Ti | 4.336211  | -3.161957 | 1.805946  |
| O  | 5.933241  | -1.004815 | 0.019237  |
| O  | 3.182551  | -4.426863 | -2.441012 |
| O  | 3.676598  | -1.565879 | -2.423493 |
| Ti | 2.934672  | -0.057253 | -1.730908 |
| O  | 8.237420  | -1.860525 | 0.040857  |

|    |           |           |           |
|----|-----------|-----------|-----------|
| O  | 2.671799  | -0.483765 | -0.011655 |
| O  | 3.649963  | -1.588529 | 2.407771  |
| Ti | 2.920105  | -0.076855 | 1.715895  |
| Ti | -7.057879 | 1.468750  | 1.384692  |
| Ti | -7.049487 | 1.476641  | -1.368521 |
| O  | -6.164434 | 2.900269  | 2.134981  |
| Ti | -4.353960 | 3.149562  | 1.800496  |
| O  | -4.196290 | 3.224169  | -0.011934 |
| O  | -6.158272 | 2.901808  | -2.134798 |
| Ti | -4.343406 | 3.151045  | -1.824098 |
| O  | -5.933267 | 1.004595  | 0.010305  |
| O  | -3.175068 | 4.443715  | 2.408786  |
| O  | -3.662703 | 1.582327  | 2.411316  |
| Ti | -2.928932 | 0.066552  | 1.729589  |
| O  | -8.237542 | 1.860260  | 0.004767  |
| O  | -2.671779 | 0.483397  | 0.007272  |
| O  | -3.663044 | 1.573244  | -2.419928 |
| Ti | -2.926147 | 0.068104  | -1.717661 |
| Ti | -6.184434 | -1.608409 | 1.706025  |
| O  | -7.161741 | -0.132940 | 2.303955  |
| O  | -4.490991 | -1.006626 | -1.496402 |
| O  | -5.447282 | -3.106195 | -2.455742 |
| O  | -6.770690 | -2.006915 | 0.024280  |
| Ti | -6.180362 | -1.596848 | -1.656520 |
| O  | -7.151836 | -0.130798 | -2.277306 |
| O  | -4.495464 | -1.014625 | 1.566902  |
| Ti | -1.519879 | -5.577871 | -1.397833 |
| O  | -1.982039 | -6.747621 | -0.041200 |
| Ti | -1.530887 | -5.598052 | 1.338540  |
| O  | -1.144168 | -4.431031 | -0.019012 |
| O  | -2.856051 | -4.711039 | 2.262878  |
| O  | -2.859702 | -4.679715 | -2.288082 |
| O  | -2.227358 | -1.865409 | -2.138655 |
| Ti | -3.701250 | -3.116138 | -1.790729 |
| O  | -3.870985 | -3.343518 | 0.006749  |
| O  | -2.224953 | -1.886826 | 2.125660  |
| Ti | -3.705388 | -3.139022 | 1.807660  |
| O  | -5.448885 | -3.138013 | 2.475855  |
| O  | -1.131369 | 0.314620  | 2.271830  |
| O  | -1.126426 | 0.331030  | -2.261214 |
| Ti | 1.430540  | -4.516294 | -1.832596 |
| O  | 1.635167  | -4.477488 | -0.028555 |
| O  | 3.155979  | -4.460752 | 2.403316  |
| Ti | 1.414031  | -4.544877 | 1.773048  |
| O  | 0.139064  | -5.846393 | 2.092341  |
| O  | 0.148789  | -5.807788 | -2.165407 |
| O  | 0.526791  | -3.020069 | -2.355896 |
| Ti | -0.333020 | -1.507723 | -1.819314 |
| O  | -0.267788 | -1.538345 | -0.008924 |
| O  | 0.516085  | -3.051855 | 2.318504  |
| Ti | -0.341119 | -1.532029 | 1.803255  |

32c

E = -32002.709902129001 Hartree

|    |           |           |           |
|----|-----------|-----------|-----------|
| O  | 0.292105  | 0.054944  | -1.208993 |
| O  | -2.125355 | 0.736495  | -0.343904 |
| Ti | 1.369680  | 2.790854  | -3.597871 |
| O  | -1.259859 | 2.264812  | -1.770960 |
| O  | -2.985290 | 3.420632  | -3.896471 |
| O  | -0.095931 | 3.906043  | -3.590436 |
| Ti | -1.662183 | 3.816179  | -2.694788 |
| O  | 0.124455  | 0.908177  | -3.504405 |
| O  | 2.643696  | -0.140799 | -2.543406 |
| O  | -1.152529 | -1.358670 | -3.282593 |
| Ti | 1.057682  | -0.770361 | -2.994666 |
| O  | 0.345274  | -3.845720 | -3.984997 |
| Ti | -1.492979 | 0.266806  | -2.189952 |
| O  | -3.909656 | -2.215272 | -2.626712 |
| Ti | -3.080843 | -1.613677 | -4.133329 |
| Ti | -0.490428 | -2.585385 | -4.948759 |
| O  | -4.380739 | -1.316296 | -5.477727 |
| Ti | -3.591516 | -0.345980 | -6.761795 |
| O  | -2.687344 | -0.904644 | -8.280811 |
| O  | -0.352472 | -2.651883 | -6.823209 |
| Ti | -0.991336 | -1.122220 | -7.525998 |
| O  | -1.893536 | -0.612851 | -5.894595 |
| O  | 0.231388  | 0.177496  | -7.325593 |
| O  | -3.856633 | 1.395071  | -6.289984 |
| O  | -2.842825 | 0.525011  | -3.518352 |
| Ti | -2.773629 | 1.885353  | -4.875189 |
| O  | -2.276084 | -3.059677 | -4.825296 |
| O  | -1.140413 | 1.976907  | -5.551518 |
| O  | 0.903804  | -1.081428 | -4.846349 |
| Ti | 0.339923  | 0.798066  | -5.537306 |
| O  | 1.679991  | 1.958874  | -5.260871 |
| O  | 1.833908  | -5.215360 | 1.521156  |
| O  | -2.515262 | -4.153478 | 3.138556  |
| Ti | -2.025639 | -4.313243 | 1.353602  |
| Ti | 0.453259  | -5.499978 | 0.332048  |
| O  | -3.320217 | -4.168458 | 0.153211  |
| Ti | -3.021652 | -2.826707 | -1.149503 |
| O  | -1.786488 | -3.976950 | -2.063020 |
| O  | 0.658535  | -5.626553 | -1.493719 |
| Ti | -0.023706 | -4.047137 | -2.160826 |
| O  | -1.530017 | -1.622930 | -0.743922 |
| O  | 0.956167  | -2.361842 | -1.702452 |
| O  | -3.873999 | -1.533853 | 0.138065  |
| O  | -1.606574 | -2.367182 | 1.725377  |
| Ti | -2.489335 | -0.757145 | 0.837433  |
| O  | -1.094523 | -5.944160 | 1.128714  |
| O  | -0.187914 | -3.763418 | 0.134874  |
| Ti | 0.377730  | -1.744244 | 0.005459  |
| Ti | 2.025876  | 4.312776  | -1.353590 |
| Ti | -0.452949 | 5.500177  | -0.332230 |

|    |           |           |           |
|----|-----------|-----------|-----------|
| O  | 3.319952  | 4.168354  | -0.152609 |
| Ti | 3.021095  | 2.826951  | 1.150187  |
| O  | 1.785753  | 3.977077  | 2.063469  |
| O  | -0.658677 | 5.626995  | 1.493468  |
| Ti | 0.022971  | 4.047506  | 2.161016  |
| O  | 1.529795  | 1.622919  | 0.744439  |
| O  | -0.956338 | 2.362092  | 1.702529  |
| O  | 3.873990  | 1.533259  | -0.136907 |
| O  | 1.606016  | 2.366883  | -1.724574 |
| Ti | 2.489315  | 0.757259  | -0.836990 |
| O  | 1.094988  | 5.943881  | -1.129125 |
| O  | 0.187754  | 3.763597  | -0.134759 |
| Ti | -0.377465 | 1.744440  | -0.005452 |
| O  | 2.514629  | 4.154330  | -3.139127 |
| O  | -1.832512 | 5.216570  | -1.522567 |
| Ti | 3.080300  | 1.614297  | 4.134046  |
| Ti | 0.489599  | 2.585558  | 4.949010  |
| O  | 4.381004  | 1.315809  | 5.477421  |
| Ti | 3.591489  | 0.346260  | 6.762161  |
| O  | 2.687062  | 0.904625  | 8.281061  |
| O  | 0.351738  | 2.651608  | 6.823476  |
| Ti | 0.991100  | 1.121995  | 7.526015  |
| O  | 1.893622  | 0.613004  | 5.894703  |
| O  | -0.231188 | -0.178063 | 7.325466  |
| O  | 3.858609  | -1.393967 | 6.288558  |
| O  | 2.842809  | -0.524781 | 3.518556  |
| Ti | 2.774142  | -1.885378 | 4.875255  |
| O  | 2.275264  | 3.060106  | 4.825812  |
| O  | 1.140883  | -1.976839 | 5.551141  |
| O  | -0.904128 | 1.081291  | 4.846440  |
| Ti | -0.339762 | -0.798413 | 5.537114  |
| O  | -1.680362 | -1.958387 | 5.260001  |
| Ti | 1.492449  | -0.266944 | 2.190851  |
| O  | 3.909209  | 2.216064  | 2.627439  |
| O  | -0.124205 | -0.907915 | 3.504381  |
| O  | -2.643930 | 0.140866  | 2.543722  |
| O  | 1.152226  | 1.358807  | 3.283152  |
| Ti | -1.057978 | 0.770730  | 2.994638  |
| O  | -0.346214 | 3.845818  | 3.985180  |
| O  | 1.259743  | -2.264865 | 1.771371  |
| O  | 2.987288  | -3.419106 | 3.894342  |
| O  | 0.096779  | -3.906559 | 3.590743  |
| Ti | 1.662770  | -3.816270 | 2.694890  |
| Ti | -1.369201 | -2.791979 | 3.598108  |
| O  | -0.292617 | -0.054779 | 1.209230  |
| O  | 2.124812  | -0.736502 | 0.344152  |

36a

E = -36003.153315334981 Hartree

|    |          |          |          |
|----|----------|----------|----------|
| O  | 6.396245 | 1.575826 | 1.474994 |
| Ti | 6.434222 | 0.111975 | 2.563713 |
| O  | 8.044001 | 0.138138 | 3.469171 |

|    |           |           |           |
|----|-----------|-----------|-----------|
| O  | 6.426743  | 1.543097  | -1.411577 |
| Ti | 6.400974  | 2.667328  | 0.020429  |
| O  | 9.463244  | 1.565512  | 1.371877  |
| O  | 7.997180  | 3.617274  | 0.025080  |
| O  | 13.564177 | 1.875445  | -1.570442 |
| Ti | 12.707610 | 0.217936  | -1.802084 |
| Ti | 9.611812  | 0.204792  | -2.498741 |
| O  | 13.455143 | -1.325649 | -1.495618 |
| O  | 13.417174 | -1.349923 | 1.506309  |
| O  | 9.591379  | -1.170717 | -1.351287 |
| Ti | 13.179858 | -2.590059 | -0.008594 |
| Ti | 9.710525  | -2.398363 | 0.014245  |
| O  | 11.381708 | 0.209308  | -3.050159 |
| O  | 8.043106  | 0.135490  | -3.454631 |
| O  | 11.320562 | -3.137356 | -0.046503 |
| O  | 14.220363 | -3.838711 | -0.007299 |
| O  | 8.093447  | -3.320588 | -0.014369 |
| Ti | 9.612094  | 0.151802  | 2.510014  |
| Ti | 12.710105 | 0.214401  | 1.810685  |
| O  | 11.381353 | 0.268539  | 3.054068  |
| O  | 9.643063  | -1.331590 | 1.507694  |
| O  | 9.518620  | 1.729129  | -1.507633 |
| Ti | 9.593979  | 2.727090  | -0.005752 |
| O  | 11.997050 | 0.646594  | 0.005746  |
| O  | 13.593044 | 1.856120  | 1.570280  |
| Ti | 12.834398 | 2.408148  | 0.010568  |
| O  | 11.334726 | 3.439910  | 0.047847  |
| Ti | 6.434672  | 0.112612  | -2.548330 |
| O  | 6.477200  | -1.308094 | 1.430942  |
| O  | 4.827138  | 0.065185  | 3.448668  |
| O  | 6.450715  | -1.339868 | -1.460956 |
| Ti | 6.492955  | -2.442045 | -0.004846 |
| O  | 3.243457  | -1.384161 | 1.436527  |
| O  | 4.891308  | -3.352821 | 0.007750  |
| Ti | 3.218766  | 0.057391  | -2.546588 |
| O  | 3.196145  | 1.492308  | -1.426934 |
| Ti | 3.178317  | 2.603773  | 0.012343  |
| O  | 4.828117  | 0.102370  | -3.435668 |
| O  | 4.778656  | 3.519197  | 0.004448  |
| Ti | 3.218502  | 0.048756  | 2.555780  |
| O  | 3.198211  | 1.502117  | 1.459237  |
| O  | 3.246574  | -1.393082 | -1.449853 |
| Ti | 3.267731  | -2.498331 | -0.002872 |
| O  | 1.607560  | 0.015125  | 3.437286  |
| O  | 1.668208  | -3.410936 | -0.002856 |
| O  | 1.610462  | 0.035759  | -3.435230 |
| O  | 1.552825  | 3.457783  | 0.007609  |
| O  | 0.015284  | -1.447535 | 1.433920  |
| Ti | -0.002371 | -0.000940 | -2.552712 |
| O  | -0.032142 | 1.436851  | -1.437648 |
| Ti | -0.046853 | 2.545849  | 0.005139  |
| Ti | -0.003078 | -0.010165 | 2.548969  |

|    |            |           |           |
|----|------------|-----------|-----------|
| O  | -0.032015  | 1.439311  | 1.449640  |
| O  | 0.018267   | -1.450293 | -1.453183 |
| Ti | 0.041706   | -2.557487 | -0.008620 |
| O  | -1.611546  | -0.043270 | 3.436670  |
| O  | -3.199795  | -1.509253 | 1.434648  |
| O  | -1.555622  | -3.472015 | -0.010201 |
| Ti | -3.219136  | -0.055235 | -2.555894 |
| O  | -3.248248  | 1.383635  | -1.445128 |
| Ti | -3.267672  | 2.489638  | 0.001241  |
| O  | -1.610018  | -0.024618 | -3.443689 |
| O  | -1.670162  | 3.404487  | 0.002473  |
| Ti | -3.219489  | -0.067599 | 2.546121  |
| O  | -3.246756  | 1.376760  | 1.442438  |
| O  | -3.197070  | -1.502397 | -1.451359 |
| Ti | -3.179567  | -2.612480 | -0.011004 |
| O  | -6.467121  | 1.309728  | 1.438536  |
| Ti | -6.433375  | -0.125461 | 2.550921  |
| O  | -4.826624  | -0.096604 | 3.438051  |
| O  | -6.460395  | 1.331862  | -1.454682 |
| Ti | -6.490388  | 2.438520  | -0.000363 |
| O  | -4.888234  | 3.347928  | 0.005622  |
| O  | -4.826666  | -0.082912 | -3.447826 |
| O  | -4.780542  | -3.525385 | -0.016981 |
| Ti | -6.434213  | -0.106285 | -2.561735 |
| O  | -6.407233  | -1.574566 | 1.441036  |
| O  | -8.040522  | -0.150507 | 3.459347  |
| O  | -6.416274  | -1.552502 | -1.446339 |
| Ti | -6.402268  | -2.671056 | -0.010485 |
| O  | -9.479654  | -1.619686 | 1.403316  |
| O  | -7.999892  | -3.618169 | -0.012970 |
| O  | -13.574770 | -1.848407 | -1.579829 |
| Ti | -12.706144 | -0.197131 | -1.808609 |
| Ti | -9.611652  | -0.173926 | -2.512469 |
| O  | -13.439525 | 1.352451  | -1.496589 |
| O  | -13.422752 | 1.350605  | 1.505789  |
| O  | -9.603555  | 1.231576  | -1.402721 |
| Ti | -13.174266 | 2.603617  | 0.003814  |
| Ti | -9.705885  | 2.405602  | 0.008468  |
| O  | -11.382731 | -0.206134 | -3.059457 |
| O  | -8.042276  | -0.123245 | -3.468895 |
| O  | -11.314381 | 3.149712  | -0.011549 |
| O  | -14.213875 | 3.852906  | 0.010517  |
| O  | -8.086473  | 3.323878  | 0.000870  |
| Ti | -9.610070  | -0.174169 | 2.502540  |
| Ti | -12.706501 | -0.210251 | 1.804154  |
| O  | -11.379584 | -0.254330 | 3.050260  |
| O  | -9.623087  | 1.280838  | 1.458985  |
| O  | -9.502964  | -1.669471 | -1.480086 |
| Ti | -9.596177  | -2.725696 | -0.019235 |
| O  | -11.994540 | -0.635571 | -0.003405 |
| O  | -13.583924 | -1.854381 | 1.560229  |
| Ti | -12.835741 | -2.395622 | -0.008646 |

|                                 |            |           |           |
|---------------------------------|------------|-----------|-----------|
| O                               | -11.339694 | -3.433442 | -0.000047 |
| 36b                             |            |           |           |
| E = -36003.098292281022 Hartree |            |           |           |
| O                               | -7.100680  | 4.106985  | 2.221850  |
| Ti                              | -5.582165  | 4.905515  | -1.316713 |
| O                               | -5.825809  | 6.106752  | 0.078561  |
| Ti                              | -5.602849  | 4.849753  | 1.427867  |
| O                               | -5.312637  | 3.703687  | 0.033876  |
| O                               | -4.008268  | 4.695023  | 2.333143  |
| O                               | -3.970478  | 4.789494  | -2.196344 |
| Ti                              | -2.458902  | 3.844636  | -1.740568 |
| O                               | -2.449729  | 4.024418  | 0.068787  |
| Ti                              | -2.489625  | 3.767745  | 1.869672  |
| O                               | -1.027524  | 4.650185  | 2.563219  |
| O                               | -0.590369  | 2.368309  | 1.480739  |
| O                               | -0.573854  | 2.433360  | -1.386195 |
| O                               | -0.987874  | 4.762561  | -2.367686 |
| O                               | 0.763910   | 4.511329  | 0.108267  |
| Ti                              | 0.451829   | 3.892201  | -1.581202 |
| Ti                              | 0.427356   | 3.816940  | 1.762425  |
| Ti                              | -8.815478  | -0.447982 | -1.450377 |
| Ti                              | -8.832043  | -0.504891 | 1.317821  |
| O                               | -8.743931  | 1.204786  | -2.271547 |
| Ti                              | -7.412448  | 2.406647  | -1.795356 |
| O                               | -7.629074  | 2.407278  | -0.001392 |
| O                               | -8.772305  | 1.113463  | 2.205164  |
| Ti                              | -7.436155  | 2.335352  | 1.793649  |
| O                               | -7.617505  | -0.304770 | -0.055896 |
| O                               | -7.066977  | 4.190787  | -2.159335 |
| O                               | -5.863954  | 1.625835  | -2.370208 |
| Ti                              | -4.405812  | 0.736648  | -1.755046 |
| O                               | -10.039440 | -0.746380 | -0.079139 |
| O                               | -4.315314  | 1.093933  | -0.002257 |
| O                               | -5.895465  | 1.534252  | 2.358737  |
| Ti                              | -4.430072  | 0.663416  | 1.731560  |
| Ti                              | -6.347190  | -2.397474 | -1.744623 |
| O                               | -8.003942  | -1.810406 | -2.380540 |
| O                               | -5.265409  | -1.036616 | 1.473923  |
| O                               | -4.963157  | -3.378719 | 2.330648  |
| O                               | -6.603162  | -3.143250 | -0.103441 |
| Ti                              | -6.368005  | -2.468449 | 1.570721  |
| O                               | -8.030990  | -1.900600 | 2.206982  |
| O                               | -5.241117  | -0.974639 | -1.574783 |
| O                               | -2.018024  | -3.275453 | -2.526763 |
| O                               | -2.046023  | -3.383808 | 2.358798  |
| O                               | -2.915600  | -0.583291 | 2.215838  |
| Ti                              | -3.467081  | -2.409165 | 1.750743  |
| O                               | -3.312119  | -2.553288 | -0.072633 |
| O                               | -2.887019  | -0.487320 | -2.274834 |
| Ti                              | -3.447073  | -2.330186 | -1.889739 |
| O                               | -4.935210  | -3.277051 | -2.525578 |



|    |           |           |           |
|----|-----------|-----------|-----------|
| O  | -2.931422 | 2.008202  | -2.211802 |
| O  | -2.959976 | 1.913686  | 2.259334  |
| O  | -0.016726 | -0.059990 | 2.604615  |
| Ti | -1.443437 | 0.678051  | 1.744568  |
| O  | -1.418431 | 0.188336  | -0.006572 |
| O  | 0.018758  | 0.057096  | -2.606629 |
| Ti | -1.421713 | 0.753853  | -1.733973 |
| O  | 2.011119  | 3.269202  | 2.534224  |
| O  | 2.046553  | 3.380152  | -2.352032 |
| Ti | 3.466662  | 2.405985  | -1.740083 |
| O  | 3.305426  | 2.545328  | 0.083031  |
| Ti | 3.439699  | 2.322865  | 1.900588  |
| O  | 4.926488  | 3.267544  | 2.540501  |
| O  | 5.243763  | 0.968609  | 1.578608  |
| O  | 5.261029  | 1.039751  | -1.462383 |
| O  | 4.961014  | 3.382823  | -2.314636 |
| O  | 6.597437  | 3.148707  | 0.117974  |
| Ti | 6.364720  | 2.472261  | -1.555959 |
| O  | 8.032059  | 1.920386  | -2.196377 |
| Ti | 6.341934  | 2.395380  | 1.756238  |
| O  | 8.001306  | 1.811924  | 2.386886  |
| Ti | 8.814102  | 0.453405  | 1.451902  |
| Ti | 8.834643  | 0.520319  | -1.315656 |
| O  | 7.618088  | 0.316761  | 0.054174  |
| O  | 8.742962  | -1.200582 | 2.269586  |
| O  | 10.040132 | 0.758608  | 0.083839  |
| Ti | 1.445337  | -0.682498 | -1.745788 |
| O  | 1.427750  | -0.198428 | 0.007321  |
| Ti | 1.423223  | -0.763020 | 1.734083  |
| Ti | -0.431032 | -3.821461 | -1.761078 |
| O  | 0.570884  | -2.439423 | 1.389163  |
| O  | 0.992198  | -4.770929 | 2.364276  |
| O  | -0.764620 | -4.515415 | -0.105212 |
| Ti | -0.452298 | -3.899183 | 1.584535  |
| O  | 0.587539  | -2.371966 | -1.485874 |
| Ti | 5.586840  | -4.905917 | 1.295833  |
| O  | 5.836201  | -6.100779 | -0.104167 |
| Ti | 5.605401  | -4.840940 | -1.448220 |
| O  | 5.309935  | -3.701189 | -0.050831 |
| O  | 4.006409  | -4.692757 | -2.347574 |
| O  | 3.976718  | -4.799123 | 2.179503  |
| O  | 2.932897  | -2.017930 | 2.206091  |
| Ti | 2.462601  | -3.853901 | 1.733953  |
| O  | 2.447591  | -4.028488 | -0.076193 |
| O  | 2.960264  | -1.913847 | -2.256755 |
| Ti | 2.486268  | -3.770747 | -1.876152 |
| O  | 1.022969  | -4.654684 | -2.566109 |
| O  | 2.915691  | 0.582648  | -2.213361 |
| O  | 2.889392  | 0.478101  | 2.282853  |
| Ti | 7.413212  | -2.405406 | 1.793835  |
| O  | 7.619782  | -2.395698 | -0.000319 |
| O  | 8.774287  | -1.098383 | -2.202503 |

|    |          |           |           |
|----|----------|-----------|-----------|
| Ti | 7.436299 | -2.320171 | -1.797374 |
| O  | 7.102417 | -4.088817 | -2.236375 |
| O  | 7.071123 | -4.193904 | 2.142386  |
| O  | 5.864796 | -1.631956 | 2.377549  |
| Ti | 4.409053 | -0.741220 | 1.757091  |
| O  | 4.325834 | -1.098111 | 0.004378  |
| O  | 5.896268 | -1.520865 | -2.367453 |
| Ti | 4.430493 | -0.660969 | -1.728087 |

36c

E = -36003.0255840 Hartree

|    |           |           |           |
|----|-----------|-----------|-----------|
| Ti | -6.217543 | -3.853362 | -1.374713 |
| Ti | -6.361942 | -3.011698 | 1.739849  |
| O  | -8.018789 | -3.544003 | -1.744553 |
| Ti | -8.274076 | -1.913348 | -0.957129 |
| O  | -9.671593 | -1.999163 | 0.294950  |
| O  | -7.896247 | -2.953244 | 2.779182  |
| Ti | -8.831000 | -1.634418 | 1.868032  |
| O  | -7.260334 | -1.588168 | 0.783156  |
| O  | -8.845765 | 0.086259  | 2.440190  |
| O  | -8.527979 | -0.507957 | -2.020920 |
| O  | -5.918863 | -2.074934 | -1.395569 |
| Ti | -7.509969 | 1.071504  | -1.761790 |
| O  | -4.723690 | -4.440671 | -2.254699 |
| O  | -4.732120 | -2.618150 | 2.363423  |
| O  | -6.273093 | -4.258788 | 0.430446  |
| Ti | -4.607658 | -0.559941 | -1.526436 |
| Ti | -4.399073 | 0.775216  | 1.743121  |
| O  | -5.820119 | 0.532088  | -2.249461 |
| O  | -7.493949 | 1.202003  | 0.075346  |
| O  | -5.934968 | 0.559179  | 2.650839  |
| Ti | -7.494667 | 1.267929  | 1.892701  |
| O  | -2.972331 | 3.658890  | -0.384884 |
| Ti | -3.176533 | 3.727224  | 1.403780  |
| O  | -4.972163 | 2.401460  | 0.917185  |
| O  | -4.624012 | 4.751825  | 1.905230  |
| O  | -7.438196 | 3.043259  | 2.188710  |
| O  | -7.677275 | 2.629636  | -2.532156 |
| O  | -6.454197 | 4.439258  | -0.457630 |
| Ti | -6.076809 | 3.884260  | 1.161749  |
| O  | -4.517330 | 3.334660  | -2.719471 |
| O  | -3.122605 | 0.714483  | -1.874687 |
| Ti | -6.326309 | 4.048439  | -2.361394 |
| Ti | -3.100316 | 2.688543  | -1.927241 |
| O  | -6.682362 | 5.340075  | -3.281190 |
| O  | -1.386264 | 2.920938  | -2.603870 |
| O  | -3.061173 | -1.732137 | -2.062189 |
| O  | -4.563686 | -0.351494 | 0.262453  |
| O  | -1.240012 | 1.150586  | -0.228636 |
| Ti | -3.178449 | -3.595843 | -1.675478 |
| O  | -3.316366 | -3.385561 | 0.088630  |
| Ti | -3.046070 | -2.236582 | 1.583260  |

|    |           |           |           |
|----|-----------|-----------|-----------|
| O  | -1.618872 | -4.379368 | -2.150776 |
| O  | -1.623617 | -2.883976 | 2.430517  |
| Ti | -1.419177 | 0.573244  | 1.538515  |
| O  | -2.969378 | -0.418295 | 2.332291  |
| O  | -1.642309 | -1.191512 | 0.366009  |
| Ti | -1.565146 | -0.438156 | -1.396924 |
| O  | -1.589732 | 4.415182  | 2.033358  |
| O  | 0.067428  | 3.668860  | -0.247221 |
| O  | 0.060720  | -0.466032 | 2.251548  |
| O  | -2.759754 | 1.934150  | 2.025731  |
| Ti | 0.014756  | 3.708123  | 1.533187  |
| O  | 0.129944  | 1.877712  | 1.898217  |
| Ti | 0.013127  | 2.399553  | -1.595300 |
| Ti | -0.015414 | -3.706948 | -1.540224 |
| Ti | -0.012817 | -2.399137 | 1.588509  |
| O  | -0.129510 | -1.876718 | -1.903789 |
| O  | 1.590215  | -4.413118 | -2.038294 |
| O  | 1.384956  | -2.921295 | 2.598944  |
| O  | -0.067597 | -3.668009 | 0.240305  |
| Ti | 1.419946  | -0.572363 | -1.543829 |
| Ti | 1.565131  | 0.439146  | 1.391677  |
| O  | -0.060387 | 0.466475  | -2.257084 |
| O  | 3.314947  | 3.386097  | -0.092707 |
| Ti | 3.176532  | 3.596215  | 1.671235  |
| O  | 1.642277  | 1.192371  | -0.371897 |
| O  | 1.617057  | 4.380825  | 2.145209  |
| O  | 1.624265  | 2.884140  | -2.436674 |
| O  | 2.971736  | 0.418817  | -2.336109 |
| Ti | 3.045841  | 2.237040  | -1.587546 |
| O  | 4.734294  | 2.617353  | -2.363248 |
| O  | 2.761374  | -1.933162 | -2.028673 |
| O  | 1.240961  | -1.149834 | 0.223084  |
| O  | 4.562247  | 0.352026  | -0.262569 |
| O  | 7.439573  | -3.043622 | -2.183945 |
| Ti | 6.076624  | -3.885008 | -1.159594 |
| Ti | 3.176874  | -3.726369 | -1.406205 |
| O  | 6.453354  | -4.438309 | 0.460928  |
| O  | 7.675981  | -2.630719 | 2.538438  |
| O  | 2.972585  | -3.658622 | 0.382359  |
| Ti | 6.326021  | -4.049625 | 2.364674  |
| Ti | 3.100170  | -2.688699 | 1.925366  |
| O  | 4.624423  | -4.752706 | -1.904360 |
| O  | 4.515709  | -3.336406 | 2.719562  |
| O  | 6.683782  | -5.342115 | 3.281653  |
| Ti | 4.606986  | 0.559963  | 1.526208  |
| O  | 3.120946  | -0.714164 | 1.873935  |
| O  | 4.972383  | -2.401061 | -0.918204 |
| Ti | 4.400529  | -0.774241 | -1.744094 |
| O  | 5.938717  | -0.557098 | -2.647782 |
| O  | 4.720598  | 4.441303  | 2.253028  |
| O  | 6.273755  | 4.257410  | -0.427876 |
| O  | 8.848936  | -0.087935 | -2.432058 |

|    |          |           |           |
|----|----------|-----------|-----------|
| Ti | 7.496076 | -1.268446 | -1.887018 |
| O  | 7.494317 | -1.202502 | -0.069795 |
| O  | 8.525397 | 0.508367  | 2.028589  |
| Ti | 7.508845 | -1.072190 | 1.767387  |
| O  | 5.817451 | -0.532969 | 2.250649  |
| O  | 3.059600 | 1.732541  | 2.058734  |
| Ti | 6.216717 | 3.854109  | 1.377357  |
| Ti | 8.272545 | 1.913448  | 0.964668  |
| O  | 8.017067 | 3.544769  | 1.750940  |
| O  | 5.918079 | 2.075074  | 1.398544  |
| O  | 7.261174 | 1.586726  | -0.777555 |
| Ti | 6.363304 | 3.009169  | -1.736736 |
| O  | 9.671405 | 1.999068  | -0.286345 |
| Ti | 8.833044 | 1.633005  | -1.860151 |
| O  | 7.898702 | 2.950620  | -2.773991 |

40a

E = -40003.5452128 Hartree

|    |           |           |           |
|----|-----------|-----------|-----------|
| Ti | 1.411205  | -5.047468 | 1.801948  |
| O  | 1.187609  | -4.914689 | 0.002428  |
| O  | -0.303047 | -5.422605 | -2.391840 |
| Ti | 1.411752  | -5.051083 | -1.797176 |
| O  | 2.969281  | -6.012499 | -2.076436 |
| O  | 2.965736  | -6.010431 | 2.085299  |
| O  | 1.979304  | -3.420132 | 2.414402  |
| Ti | 2.431438  | -1.765344 | 1.816639  |
| O  | 2.372868  | -1.809941 | 0.008569  |
| O  | 1.980502  | -3.421503 | -2.397932 |
| Ti | 2.436207  | -1.768324 | -1.799715 |
| O  | 2.758877  | 0.198473  | -2.336505 |
| O  | 2.757407  | 0.195656  | 2.359255  |
| Ti | 4.549683  | -5.366803 | 1.368803  |
| O  | 5.265488  | -6.386426 | 0.003838  |
| Ti | 4.551382  | -5.363523 | -1.360718 |
| O  | 3.930899  | -4.315413 | 0.005026  |
| O  | 5.661589  | -4.186662 | -2.256962 |
| O  | 5.659249  | -4.188745 | 2.263287  |
| O  | 4.371087  | -1.624422 | 2.112036  |
| Ti | 6.099957  | -2.456714 | 1.799685  |
| O  | 6.328284  | -2.581863 | -0.000421 |
| O  | 4.364220  | -1.629665 | -2.094225 |
| Ti | 6.106855  | -2.452564 | -1.797965 |
| O  | 7.803922  | -2.001404 | -2.454094 |
| O  | 6.337467  | -0.172727 | -1.592117 |
| O  | 6.339439  | -0.161589 | 1.556120  |
| O  | 7.785582  | -1.993246 | 2.466055  |
| O  | 8.780809  | -0.555082 | -0.000930 |
| Ti | 8.120605  | -0.330940 | 1.687258  |
| O  | 8.658152  | 1.359054  | 2.270777  |
| Ti | 8.125188  | -0.331355 | -1.690943 |
| O  | 8.660680  | 1.354712  | -2.289283 |
| Ti | 8.094293  | 2.875298  | -1.388452 |

|    |           |           |           |
|----|-----------|-----------|-----------|
| Ti | 8.092756  | 2.872649  | 1.360733  |
| O  | 6.848869  | 4.028404  | -2.117474 |
| Ti | 5.029705  | 3.811112  | -1.799293 |
| O  | 4.831810  | 3.819528  | 0.008192  |
| O  | 6.854677  | 4.022336  | 2.104977  |
| Ti | 5.030807  | 3.807000  | 1.814635  |
| O  | 7.138635  | 2.126428  | -0.015917 |
| O  | 3.579337  | 4.820982  | -2.359174 |
| O  | 4.792771  | 2.109218  | -2.396440 |
| Ti | 4.547832  | 0.433075  | -1.720855 |
| O  | 9.132114  | 3.562767  | -0.013274 |
| O  | 4.178722  | 0.730714  | 0.009332  |
| O  | 4.801669  | 2.105363  | 2.417250  |
| Ti | 4.549503  | 0.430042  | 1.739872  |
| O  | 0.702151  | -0.998480 | 2.128221  |
| O  | 0.706712  | -0.997326 | -2.129472 |
| Ti | 1.832817  | 4.522240  | -1.811977 |
| O  | 1.825950  | 4.586484  | 0.011336  |
| O  | 3.582867  | 4.816217  | 2.380303  |
| Ti | 1.833857  | 4.521426  | 1.833420  |
| O  | 0.308820  | 5.419685  | -2.381495 |
| O  | 1.517203  | 2.792359  | -2.258075 |
| Ti | 1.131887  | 1.071489  | -1.789926 |
| O  | 1.235713  | 1.121559  | 0.007800  |
| O  | 1.519159  | 2.791249  | 2.280045  |
| Ti | 1.129938  | 1.072589  | 1.806961  |
| Ti | -1.833338 | -4.525339 | 1.809956  |
| O  | -1.826328 | -4.591600 | -0.013565 |
| O  | -3.586177 | -4.816906 | -2.384899 |
| Ti | -1.834628 | -4.523718 | -1.835478 |
| O  | -0.307687 | -5.422569 | 2.380781  |
| O  | -1.520112 | -2.794283 | 2.252606  |
| Ti | -1.132698 | -1.072620 | 1.786304  |
| O  | -1.238931 | -1.116851 | -0.012338 |
| O  | -1.519364 | -2.793017 | -2.280681 |
| Ti | -1.131411 | -1.072547 | -1.811562 |
| O  | -0.703640 | 0.997542  | -2.133470 |
| O  | -0.706889 | 0.997047  | 2.127266  |
| Ti | -8.094227 | -2.873564 | 1.388363  |
| Ti | -8.095567 | -2.868914 | -1.361232 |
| O  | -6.851122 | -4.029439 | 2.120158  |
| Ti | -5.031378 | -3.813622 | 1.799891  |
| O  | -4.838610 | -3.831990 | -0.007900 |
| O  | -6.860315 | -4.020780 | -2.109328 |
| Ti | -5.034903 | -3.807433 | -1.814934 |
| O  | -7.138892 | -2.125173 | 0.015321  |
| O  | -3.580448 | -4.825439 | 2.360603  |
| O  | -4.794167 | -2.110908 | 2.395358  |
| Ti | -4.547357 | -0.433642 | 1.724240  |
| O  | -9.134606 | -3.558482 | 0.014255  |
| O  | -4.179470 | -0.729118 | -0.007301 |
| O  | -4.805652 | -2.104320 | -2.411611 |

|    |           |           |           |
|----|-----------|-----------|-----------|
| Ti | -4.550710 | -0.429232 | -1.737186 |
| Ti | -8.123658 | 0.334087  | 1.691575  |
| O  | -8.657216 | -1.352003 | 2.290479  |
| O  | -6.340461 | 0.166482  | -1.552408 |
| O  | -7.786162 | 1.997845  | -2.463828 |
| O  | -8.782383 | 0.558631  | 0.002585  |
| Ti | -8.122165 | 0.336029  | -1.686118 |
| O  | -8.659325 | -1.353977 | -2.270142 |
| O  | -6.335565 | 0.176152  | 1.588505  |
| Ti | -4.546600 | 5.365493  | -1.366202 |
| O  | -5.262030 | 6.382872  | -0.000429 |
| Ti | -4.546729 | 5.360169  | 1.363480  |
| O  | -3.924170 | 4.314398  | -0.003580 |
| O  | -5.655364 | 4.184216  | 2.258730  |
| O  | -5.655739 | 4.188584  | -2.260795 |
| O  | -4.371933 | 1.624571  | -2.115156 |
| Ti | -6.099230 | 2.458030  | -1.798770 |
| O  | -6.324563 | 2.586704  | 0.001710  |
| O  | -4.362917 | 1.628975  | 2.100399  |
| Ti | -6.103719 | 2.451771  | 1.799223  |
| O  | -7.800940 | 2.002369  | 2.455660  |
| O  | -2.757786 | -0.200243 | 2.337561  |
| O  | -2.760276 | -0.196963 | -2.361510 |
| Ti | -1.409470 | 5.050803  | -1.801551 |
| O  | -1.182550 | 4.924098  | -0.002750 |
| O  | 0.304978  | 5.418832  | 2.390419  |
| Ti | -1.408856 | 5.053088  | 1.796677  |
| O  | -2.966599 | 6.009684  | 2.079248  |
| O  | -2.964702 | 6.010661  | -2.083826 |
| O  | -1.979353 | 3.421093  | -2.406617 |
| Ti | -2.433428 | 1.764364  | -1.818196 |
| O  | -2.382202 | 1.798566  | -0.010533 |
| O  | -1.976358 | 3.420823  | 2.389982  |
| Ti | -2.436345 | 1.766753  | 1.798062  |

40b

E = -40003.536524011128 Hartree

|    |           |           |           |
|----|-----------|-----------|-----------|
| O  | -0.012662 | -0.011752 | 3.424440  |
| O  | -1.588467 | -1.475044 | 1.416682  |
| O  | 0.060285  | -3.438513 | -0.022297 |
| Ti | -1.601613 | -0.024547 | -2.569984 |
| O  | -1.628591 | 1.414083  | -1.456823 |
| Ti | -1.655881 | 2.521432  | -0.012957 |
| O  | 0.013329  | 0.004940  | -3.448079 |
| O  | -0.057692 | 3.432634  | -0.005005 |
| Ti | -1.618498 | -0.036524 | 2.530952  |
| O  | -1.637992 | 1.409304  | 1.427312  |
| O  | -1.577723 | -1.471338 | -1.466614 |
| Ti | -1.566485 | -2.582529 | -0.026550 |
| O  | -3.230970 | -0.067456 | 3.413572  |
| O  | -4.814947 | -1.537723 | 1.415227  |
| O  | -3.166850 | -3.492697 | -0.033483 |

|    |            |           |           |
|----|------------|-----------|-----------|
| Ti | -4.825579  | -0.078002 | -2.578448 |
| O  | -4.856941  | 1.363300  | -1.471375 |
| Ti | -4.881718  | 2.465512  | -0.022097 |
| O  | -3.211990  | -0.050238 | -3.459169 |
| O  | -3.282734  | 3.377032  | -0.015907 |
| Ti | -4.838243  | -0.092968 | 2.522843  |
| O  | -4.860243  | 1.347565  | 1.414877  |
| O  | -4.803619  | -1.521532 | -1.469574 |
| Ti | -4.792878  | -2.636222 | -0.033486 |
| O  | -8.094373  | 1.277971  | 1.404701  |
| Ti | -8.056724  | -0.151873 | 2.523805  |
| O  | -6.449216  | -0.117045 | 3.409717  |
| O  | -8.076057  | 1.311964  | -1.486927 |
| Ti | -8.110619  | 2.413125  | -0.029127 |
| O  | -6.505980  | 3.319271  | -0.015685 |
| O  | -6.435800  | -0.111226 | -3.467783 |
| O  | -6.396264  | -3.546454 | -0.046385 |
| Ti | -8.047995  | -0.129909 | -2.587950 |
| O  | -8.025903  | -1.605322 | 1.420155  |
| O  | -9.665480  | -0.176804 | 3.429933  |
| O  | -8.036623  | -1.571174 | -1.466116 |
| Ti | -8.020442  | -2.695596 | -0.035135 |
| O  | -11.103207 | -1.634649 | 1.365537  |
| O  | -9.619966  | -3.640511 | -0.038812 |
| O  | -15.194102 | -1.874690 | -1.615481 |
| Ti | -14.325966 | -0.222904 | -1.841749 |
| Ti | -11.230553 | -0.202950 | -2.541139 |
| O  | -15.062338 | 1.325648  | -1.529552 |
| O  | -15.047712 | 1.322990  | 1.472979  |
| O  | -11.226925 | 1.194729  | -1.421663 |
| Ti | -14.798600 | 2.575583  | -0.028485 |
| Ti | -11.329921 | 2.378398  | -0.017997 |
| O  | -13.001124 | -0.229627 | -3.091402 |
| O  | -9.657747  | -0.148172 | -3.493337 |
| O  | -12.938182 | 3.122601  | -0.044655 |
| O  | -15.837168 | 3.825905  | -0.020820 |
| O  | -9.709045  | 3.295173  | -0.029724 |
| Ti | -11.236273 | -0.196711 | 2.473881  |
| Ti | -14.332192 | -0.238471 | 1.771428  |
| O  | -13.006773 | -0.285009 | 3.019064  |
| O  | -11.254038 | 1.265683  | 1.441719  |
| O  | -11.128685 | -1.706038 | -1.519686 |
| Ti | -11.217706 | -2.749916 | -0.050286 |
| O  | -13.618210 | -0.661941 | -0.035434 |
| O  | -15.208328 | -1.882973 | 1.525891  |
| Ti | -14.457745 | -2.421958 | -0.042628 |
| O  | -12.960843 | -3.458778 | -0.027108 |
| O  | 7.995088   | 1.612075  | 1.507673  |
| Ti | 8.033257   | 0.140423  | 2.585774  |
| O  | 9.637084   | 0.165032  | 3.501035  |
| O  | 8.044658   | 1.559907  | -1.380594 |
| Ti | 8.012555   | 2.692475  | 0.045545  |

|    |           |           |           |
|----|-----------|-----------|-----------|
| O  | 9.611085  | 3.639613  | 0.056884  |
| O  | 9.674335  | 0.164763  | -3.422091 |
| O  | 9.707437  | -3.296484 | 0.016805  |
| Ti | 8.059841  | 0.135711  | -2.526339 |
| O  | 8.087320  | -1.273295 | 1.444443  |
| O  | 6.421663  | 0.087047  | 3.463238  |
| O  | 8.072611  | -1.325670 | -1.451218 |
| Ti | 8.107988  | -2.415702 | 0.014218  |
| O  | 4.852111  | -1.356208 | 1.443268  |
| O  | 6.506615  | -3.326426 | 0.024816  |
| Ti | 4.844016  | 0.085848  | -2.539191 |
| O  | 4.815472  | 1.520795  | -1.419874 |
| Ti | 4.792133  | 2.631225  | 0.018849  |
| O  | 6.456234  | 0.132047  | -3.421143 |
| O  | 6.391441  | 3.546578  | 0.014448  |
| Ti | 4.819500  | 0.075426  | 2.561972  |
| O  | 4.808157  | 1.527935  | 1.463869  |
| O  | 4.876229  | -1.362509 | -1.441515 |
| Ti | 4.884748  | -2.470226 | 0.003884  |
| O  | 3.206106  | 0.044395  | 3.441389  |
| O  | 1.636665  | -1.423106 | 1.434337  |
| O  | 3.286467  | -3.383053 | -0.005901 |
| Ti | 1.622644  | 0.031187  | -2.556479 |
| O  | 1.597513  | 1.472416  | -1.446285 |
| Ti | 1.569579  | 2.576075  | -0.000359 |
| O  | 3.237647  | 0.062011  | -3.433908 |
| O  | 3.166960  | 3.488860  | 0.010353  |
| Ti | 1.602139  | 0.017143  | 2.545115  |
| O  | 1.586919  | 1.461021  | 1.437286  |
| O  | 1.650082  | -1.412054 | -1.449323 |
| Ti | 1.660254  | -2.527875 | -0.011500 |
| O  | 11.068366 | 1.580529  | 1.404342  |
| O  | 15.185342 | 1.900634  | -1.511581 |
| Ti | 14.330947 | 0.242608  | -1.745877 |
| Ti | 11.238336 | 0.232431  | -2.456918 |
| O  | 15.076554 | -1.301565 | -1.434546 |
| O  | 15.019475 | -1.324812 | 1.568171  |
| O  | 11.209906 | -1.137605 | -1.302828 |
| Ti | 14.791049 | -2.564124 | 0.051993  |
| Ti | 11.323076 | -2.372863 | 0.057635  |
| O  | 13.010581 | 0.232565  | -3.000329 |
| O  | 12.932726 | -3.112322 | 0.001444  |
| O  | 15.827678 | -3.816009 | 0.061211  |
| Ti | 11.211323 | 0.173376  | 2.551406  |
| Ti | 14.312217 | 0.240651  | 1.866974  |
| O  | 12.977873 | 0.296559  | 3.104084  |
| O  | 11.250227 | -1.314279 | 1.556928  |
| O  | 11.144538 | 1.761766  | -1.474042 |
| Ti | 11.208171 | 2.749965  | 0.033856  |
| O  | 13.611515 | 0.671373  | 0.057212  |
| O  | 15.199696 | 1.880734  | 1.629810  |
| Ti | 14.448838 | 2.433295  | 0.066951  |



O 12.948596 3.464098 0.101032

40c

E = -40003.4234628 Hartree

|    |           |           |           |
|----|-----------|-----------|-----------|
| Ti | 4.827100  | -4.031136 | 1.577797  |
| Ti | -6.372655 | -3.930736 | 1.294154  |
| Ti | -5.833335 | -2.354050 | -1.628100 |
| O  | -8.155048 | -3.320608 | 1.553934  |
| Ti | -8.654791 | -1.698872 | 0.904924  |
| O  | -9.781458 | -1.686396 | -0.565344 |
| O  | -7.380206 | -2.309862 | -2.707973 |
| Ti | -8.524426 | -1.208350 | -1.847800 |
| O  | -7.329219 | -1.251395 | -0.385322 |
| O  | -8.326890 | 0.509525  | -2.465696 |
| O  | -8.488677 | -0.173692 | 1.903535  |
| O  | -5.504286 | -2.553676 | 2.040763  |
| Ti | -7.044754 | 0.999539  | 1.631212  |
| O  | -5.069020 | -5.178200 | 1.747633  |
| O  | -4.421723 | -2.924257 | -2.595237 |
| O  | -6.177686 | -3.757287 | -0.489360 |
| Ti | -4.325651 | -1.271627 | 1.475631  |
| Ti | -3.766233 | 0.153043  | -1.514818 |
| O  | -5.554181 | 0.030243  | 1.871078  |
| O  | -7.071649 | 1.572518  | -0.118858 |
| O  | -5.530093 | -0.046464 | -2.096922 |
| Ti | -6.789937 | 1.342123  | -1.871323 |
| O  | -3.672802 | 0.788222  | 0.181063  |
| O  | -6.063860 | 2.930591  | -2.433681 |
| O  | -6.610998 | 2.545773  | 2.491205  |
| O  | -4.976412 | 3.687043  | 0.176975  |
| O  | -3.559604 | 2.316568  | 2.426919  |
| O  | -2.680027 | -0.543589 | 2.263347  |
| Ti | -5.011832 | 3.409244  | 2.029381  |
| Ti | -2.435287 | 1.279753  | 1.508272  |
| O  | -4.560453 | 4.936738  | 2.751142  |
| O  | -0.590515 | 1.737296  | 2.253318  |
| O  | -2.828621 | -2.943568 | 1.831688  |
| O  | -4.293342 | -1.664445 | -0.359719 |
| Ti | -0.217777 | -5.346563 | 1.471784  |
| Ti | -3.338141 | -4.694676 | 1.322772  |
| O  | -3.221339 | -4.414540 | -0.443616 |
| Ti | -2.822238 | -3.026273 | -1.608760 |
| O  | -1.957481 | -5.765073 | 1.873357  |
| O  | -1.172017 | -2.395647 | -0.279616 |
| O  | 0.023411  | -3.559194 | 2.057616  |
| Ti | -1.297124 | -1.821037 | 1.484375  |
| O  | 0.460411  | -1.133826 | 2.067417  |
| O  | -1.449762 | -3.728478 | -2.506855 |
| Ti | -0.600905 | -0.649751 | -1.359607 |
| O  | -2.355353 | -0.981526 | -2.046603 |
| O  | -1.122471 | -0.044039 | 0.467545  |
| O  | 4.749293  | -5.822113 | 1.796681  |

|    |           |           |           |
|----|-----------|-----------|-----------|
| Ti | 2.909307  | -6.090757 | 1.289423  |
| O  | 2.883875  | -6.234149 | -0.429967 |
| O  | -0.069654 | -5.036016 | -0.264938 |
| Ti | 2.858167  | -5.834526 | -2.360819 |
| Ti | 0.210629  | -3.723552 | -1.602866 |
| O  | 1.219944  | -6.405894 | 1.975681  |
| O  | 1.377080  | -4.584992 | -2.560318 |
| O  | 2.665339  | -7.204037 | -3.217187 |
| O  | 1.648843  | -2.688879 | -0.191477 |
| O  | 2.874533  | -4.217973 | 1.738094  |
| Ti | 1.694846  | -2.681368 | 1.594538  |
| O  | 3.144608  | -1.695602 | 2.257815  |
| Ti | -4.823270 | 4.033095  | -1.569428 |
| O  | 5.067415  | 5.176953  | -1.757537 |
| O  | 2.677552  | 0.542899  | -2.262179 |
| O  | 0.591746  | -1.736464 | -2.247997 |
| O  | 2.827284  | 2.944960  | -1.832258 |
| Ti | 0.215669  | 5.350983  | -1.462105 |
| Ti | 3.337236  | 4.696407  | -1.324523 |
| O  | 1.954821  | 5.768266  | -1.867982 |
| O  | 1.172452  | 2.398901  | 0.282432  |
| O  | -0.025991 | 3.564783  | -2.050275 |
| Ti | 1.296554  | 1.823278  | -1.481366 |
| O  | -0.459670 | 1.138315  | -2.062311 |
| O  | -4.749200 | 5.825273  | -1.779650 |
| Ti | -2.910115 | 6.096514  | -1.269781 |
| O  | -2.887189 | 6.235198  | 0.450458  |
| O  | 0.069354  | 5.038964  | 0.274796  |
| Ti | -2.863552 | 5.825856  | 2.379458  |
| Ti | -0.209365 | 3.724647  | 1.610257  |
| O  | -1.221952 | 6.415228  | -1.956880 |
| O  | -1.377620 | 4.580584  | 2.570837  |
| O  | -2.674502 | 7.190019  | 3.244884  |
| O  | -1.649935 | 2.690096  | 0.199146  |
| O  | -2.870489 | 4.225517  | -1.725524 |
| Ti | -1.696200 | 2.684979  | -1.586873 |
| O  | -3.146556 | 1.703375  | -2.251701 |
| Ti | 6.370680  | 3.927357  | -1.308923 |
| Ti | 5.838036  | 2.354514  | 1.616969  |
| O  | 8.151760  | 3.315997  | -1.575643 |
| Ti | 8.652945  | 1.694399  | -0.927013 |
| O  | 9.784425  | 1.683302  | 0.539054  |
| O  | 7.390091  | 2.311880  | 2.689706  |
| Ti | 8.530957  | 1.209080  | 1.826917  |
| O  | 7.331066  | 1.249835  | 0.368586  |
| O  | 8.334622  | -0.507008 | 2.450071  |
| O  | 8.481867  | 0.166758  | -1.921646 |
| O  | 5.500909  | 2.550733  | -2.054725 |
| Ti | 7.038525  | -1.004672 | -1.640045 |
| O  | 4.429454  | 2.925607  | 2.588168  |
| O  | 6.180064  | 3.755934  | 0.475129  |
| Ti | 4.323887  | 1.271832  | -1.481279 |

|    |          |           |           |
|----|----------|-----------|-----------|
| Ti | 3.768865 | -0.150497 | 1.516079  |
| O  | 5.548024 | -0.034554 | -1.876983 |
| O  | 7.070769 | -1.574690 | 0.111164  |
| O  | 5.535710 | 0.049406  | 2.090920  |
| Ti | 6.794623 | -1.339480 | 1.863763  |
| O  | 3.673310 | -0.790469 | -0.177388 |
| O  | 6.069093 | -2.925278 | 2.434921  |
| O  | 6.603021 | -2.554135 | -2.493680 |
| O  | 4.976812 | -3.691594 | -0.169947 |
| O  | 3.556111 | -2.323222 | -2.420239 |
| Ti | 5.006965 | -3.417726 | -2.023295 |
| Ti | 2.435633 | -1.280406 | -1.503317 |
| O  | 4.554352 | -4.947746 | -2.739294 |
| O  | 4.295082 | 1.664503  | 0.353872  |
| O  | 3.223477 | 4.416205  | 0.442033  |
| Ti | 2.825065 | 3.028418  | 1.608616  |
| O  | 1.454183 | 3.730034  | 2.509942  |
| Ti | 0.603036 | 0.652447  | 1.364107  |
| O  | 2.358782 | 0.986107  | 2.047412  |
| O  | 1.123877 | 0.046429  | -0.463374 |

48a

E = -48004.2908769 Hartree

|    |           |          |           |
|----|-----------|----------|-----------|
| Ti | -6.618716 | 3.710478 | -1.800281 |
| O  | -6.772900 | 3.550087 | 0.002788  |
| O  | -8.040635 | 2.702627 | 2.431385  |
| Ti | -6.614000 | 3.709998 | 1.804586  |
| O  | -6.255578 | 5.493318 | 2.128309  |
| O  | -6.256656 | 5.490227 | -2.136464 |
| O  | -5.042783 | 2.944488 | -2.322021 |
| Ti | -3.487583 | 2.144724 | -1.806919 |
| O  | -3.551642 | 2.111595 | 0.001951  |
| O  | -5.032672 | 2.949805 | 2.322688  |
| Ti | -3.483693 | 2.140923 | 1.808774  |
| O  | -1.801912 | 1.022785 | 2.146004  |
| O  | -1.806499 | 1.025156 | -2.152285 |
| Ti | -4.734706 | 6.215970 | -1.375345 |
| O  | -4.991989 | 7.437418 | -0.007149 |
| Ti | -4.736150 | 6.219164 | 1.361690  |
| O  | -4.427331 | 5.039925 | -0.003867 |
| O  | -3.134110 | 6.188988 | 2.272709  |
| O  | -3.131262 | 6.182962 | -2.279373 |
| O  | -2.088715 | 3.486055 | -2.141324 |
| Ti | -1.549498 | 5.360268 | -1.792542 |
| O  | -1.588964 | 5.628680 | 0.000536  |
| O  | -2.074917 | 3.487183 | 2.142321  |
| Ti | -1.560465 | 5.358156 | 1.797163  |
| O  | -0.118374 | 6.325053 | 2.456827  |
| O  | 0.305871  | 4.060316 | 1.448837  |
| O  | 0.276289  | 4.077600 | -1.492999 |
| O  | -0.112614 | 6.355392 | -2.440774 |
| O  | 1.672744  | 6.116187 | 0.000012  |

|    |            |           |           |
|----|------------|-----------|-----------|
| Ti | 1.360167   | 5.502174  | -1.690077 |
| Ti | 1.359444   | 5.492048  | 1.688974  |
| Ti | -0.443149  | 2.305112  | 1.722332  |
| O  | -0.310323  | 1.810303  | -0.004313 |
| Ti | -0.447058  | 2.305369  | -1.727210 |
| Ti | -9.753252  | -1.885084 | -1.372492 |
| Ti | -9.750021  | -1.895584 | 1.383038  |
| O  | -9.753473  | -0.200017 | -2.131210 |
| Ti | -8.361651  | 0.984988  | -1.807561 |
| O  | -8.311611  | 1.146845  | 0.004106  |
| O  | -9.740798  | -0.214141 | 2.150496  |
| Ti | -8.360179  | 0.982979  | 1.814903  |
| O  | -8.554090  | -1.687139 | 0.004499  |
| O  | -8.048588  | 2.704869  | -2.421672 |
| O  | -6.923766  | 0.034827  | -2.392345 |
| Ti | -5.488674  | -0.856307 | -1.726719 |
| O  | -10.961578 | -2.190728 | 0.005834  |
| O  | -5.471784  | -0.382348 | 0.001387  |
| O  | -6.915271  | 0.042503  | 2.394424  |
| Ti | -5.486692  | -0.856911 | 1.728635  |
| Ti | -7.352891  | -4.000797 | -1.678448 |
| O  | -8.972774  | -3.286887 | -2.287328 |
| O  | -6.248384  | -2.593588 | 1.578121  |
| O  | -5.914038  | -4.923261 | 2.405183  |
| O  | -7.622845  | -4.656096 | -0.001371 |
| Ti | -7.351841  | -4.010146 | 1.680479  |
| O  | -8.977938  | -3.308430 | 2.286291  |
| O  | -6.239816  | -2.593308 | -1.546327 |
| O  | -2.968295  | -4.916497 | -2.412939 |
| O  | -2.967633  | -4.926209 | 2.410245  |
| O  | -3.874204  | -2.107976 | 2.167697  |
| Ti | -4.411382  | -3.964277 | 1.815388  |
| O  | -4.278270  | -4.121446 | -0.002137 |
| O  | -3.875844  | -2.104194 | -2.182635 |
| Ti | -4.414100  | -3.954435 | -1.820541 |
| O  | -5.920156  | -4.903051 | -2.425135 |
| O  | -4.086096  | 0.346930  | -2.269549 |
| O  | -4.081713  | 0.344865  | 2.270146  |
| O  | -1.020524  | -1.622180 | 2.552304  |
| Ti | -2.464464  | -0.782865 | 1.819632  |
| O  | -2.405469  | -0.914098 | -0.003512 |
| O  | -1.018286  | -1.616400 | -2.557092 |
| Ti | -2.465447  | -0.779157 | -1.825077 |
| O  | 1.021479   | 1.620315  | -2.552691 |
| Ti | 2.466592   | 0.782348  | -1.820605 |
| O  | 2.423855   | 0.912031  | 0.002791  |
| O  | 1.018131   | 1.615643  | 2.556178  |
| Ti | 2.464579   | 0.776691  | 1.825277  |
| O  | 4.084268   | -0.349918 | 2.266941  |
| O  | 4.084398   | -0.343910 | -2.269736 |
| O  | 2.966939   | 4.914607  | 2.415468  |
| O  | 2.969003   | 4.920437  | -2.408753 |

|    |           |           |           |
|----|-----------|-----------|-----------|
| O  | 3.878176  | 2.109542  | -2.168815 |
| Ti | 4.416027  | 3.965756  | -1.809646 |
| O  | 4.277003  | 4.123809  | 0.007541  |
| O  | 3.875028  | 2.102333  | 2.186497  |
| Ti | 4.414824  | 3.954075  | 1.825541  |
| O  | 5.919620  | 4.902344  | 2.431803  |
| O  | 6.237646  | 2.592918  | 1.548301  |
| O  | 6.247884  | 2.596776  | -1.556513 |
| O  | 5.917921  | 4.922254  | -2.402720 |
| O  | 7.624136  | 4.658038  | 0.007574  |
| Ti | 7.354141  | 4.010143  | -1.673653 |
| O  | 8.978957  | 3.306877  | -2.279831 |
| Ti | 7.351119  | 3.999714  | 1.683377  |
| O  | 8.970044  | 3.286991  | 2.295057  |
| Ti | 9.752484  | 1.885991  | 1.380664  |
| Ti | 9.752352  | 1.895841  | -1.374815 |
| O  | 9.750494  | 0.200583  | 2.138136  |
| Ti | 8.358696  | -0.983064 | 1.809605  |
| O  | 8.310053  | -1.141966 | -0.002135 |
| O  | 9.744466  | 0.215417  | -2.144174 |
| Ti | 8.360255  | -0.978556 | -1.812624 |
| O  | 8.555104  | 1.688049  | 0.002399  |
| O  | 8.043129  | -2.704111 | 2.420371  |
| O  | 6.920526  | -0.034889 | 2.397106  |
| Ti | 5.485745  | 0.855021  | 1.728405  |
| O  | 10.962474 | 2.191566  | 0.003638  |
| O  | 5.477028  | 0.379249  | 0.000332  |
| O  | 6.918229  | -0.034405 | -2.394295 |
| Ti | 5.487433  | 0.859975  | -1.725172 |
| Ti | 0.443952  | -2.306384 | -1.724661 |
| O  | 0.319156  | -1.813189 | 0.002041  |
| Ti | 0.445576  | -2.311505 | 1.725223  |
| Ti | -1.357858 | -5.494659 | -1.692256 |
| O  | -0.284990 | -4.079894 | 1.481469  |
| O  | 0.114188  | -6.357291 | 2.434171  |
| O  | -1.671511 | -6.124501 | -0.005497 |
| Ti | -1.361341 | -5.509431 | 1.684552  |
| O  | -0.305735 | -4.061620 | -1.451944 |
| Ti | 4.734992  | -6.217264 | 1.368983  |
| O  | 4.993285  | -7.438524 | 0.000811  |
| Ti | 4.738197  | -6.219693 | -1.367392 |
| O  | 4.426207  | -5.041734 | -0.001922 |
| O  | 3.136963  | -6.188084 | -2.280984 |
| O  | 3.131195  | -6.184450 | 2.273257  |
| O  | 2.083881  | -3.489262 | 2.137276  |
| Ti | 1.549815  | -5.361835 | 1.784946  |
| O  | 1.596972  | -5.625197 | -0.008266 |
| O  | 2.075190  | -3.486459 | -2.149135 |
| Ti | 1.563182  | -5.356791 | -1.805651 |
| O  | 0.120403  | -6.324770 | -2.462773 |
| O  | 1.804071  | -1.022692 | -2.149277 |
| O  | 1.804568  | -1.027732 | 2.151249  |

|    |          |           |           |
|----|----------|-----------|-----------|
| Ti | 6.610679 | -3.705808 | 1.800058  |
| O  | 6.750122 | -3.527218 | -0.002696 |
| O  | 8.040927 | -2.698906 | -2.428002 |
| Ti | 6.611143 | -3.703905 | -1.804676 |
| O  | 6.260082 | -5.489272 | -2.125544 |
| O  | 6.257517 | -5.489075 | 2.126621  |
| O  | 5.033114 | -2.949586 | 2.331910  |
| Ti | 3.484311 | -2.146046 | 1.803640  |
| O  | 3.555143 | -2.113352 | -0.005267 |
| O  | 5.031367 | -2.948837 | -2.335761 |
| Ti | 3.485509 | -2.140286 | -1.812769 |

48b

E = -48004.1698765 Hartree

|    |           |           |           |
|----|-----------|-----------|-----------|
| Ti | -6.194992 | 2.133633  | -3.294456 |
| O  | -5.679447 | 1.402690  | -4.938356 |
| Ti | -4.462472 | 0.225792  | -4.229291 |
| O  | -4.908600 | 0.967562  | -2.636856 |
| O  | -2.616214 | 0.536307  | -4.332091 |
| O  | -5.540570 | 3.744882  | -2.792066 |
| O  | -4.429816 | 3.406963  | -0.115269 |
| Ti | -3.934395 | 4.143162  | -1.924074 |
| O  | -2.834835 | 2.939741  | -2.633318 |
| O  | -1.740921 | 0.652005  | -1.432032 |
| Ti | -1.605697 | 1.680117  | -3.238699 |
| O  | -0.658146 | 2.892072  | -4.262899 |
| O  | -0.028344 | 2.465158  | -1.820690 |
| O  | -2.433874 | 4.832136  | -0.515444 |
| O  | -3.324350 | 5.785158  | -2.621274 |
| O  | -0.400377 | 5.289271  | -2.838074 |
| Ti | -1.722678 | 5.978612  | -1.765330 |
| O  | -1.121796 | 7.493182  | -0.865690 |
| Ti | 0.493099  | 3.704860  | -3.095979 |
| O  | 2.236177  | 4.514009  | -2.174910 |
| Ti | 2.146315  | 5.365175  | -0.480642 |
| Ti | 0.189372  | 7.113135  | 0.363521  |
| O  | 2.877057  | 4.415332  | 0.870582  |
| Ti | 1.938919  | 3.208876  | 1.981754  |
| O  | 0.707944  | 4.445825  | 2.501241  |
| O  | -0.241393 | 7.089616  | 2.164360  |
| Ti | -0.663947 | 5.487689  | 3.020187  |
| O  | 0.344900  | 5.333029  | -0.083801 |
| O  | 2.024194  | 2.319496  | 3.640163  |
| O  | 1.092609  | 2.048694  | 0.856666  |
| Ti | -0.489337 | 1.502932  | -0.155922 |
| O  | 1.978022  | 7.180648  | -0.142920 |
| O  | -1.608671 | 2.564096  | 0.740599  |
| O  | -2.234703 | 4.996100  | 2.260743  |
| Ti | -2.875561 | 3.811097  | 1.048034  |
| O  | -0.958792 | 4.949670  | 4.784586  |
| O  | -5.085112 | -1.492102 | -3.936729 |
| Ti | -7.933557 | -1.590376 | 1.416019  |

|    |           |           |           |
|----|-----------|-----------|-----------|
| Ti | -6.184477 | -3.467917 | 0.421241  |
| O  | -8.722345 | -0.414436 | 0.227753  |
| Ti | -7.666667 | 0.562053  | -0.959549 |
| O  | -6.648931 | -0.781082 | -1.592232 |
| O  | -5.913144 | -3.463635 | -1.421227 |
| Ti | -5.352272 | -1.890362 | -2.164461 |
| O  | -6.170829 | -1.692101 | 0.870133  |
| O  | -7.773880 | 1.599319  | -2.512426 |
| O  | -6.692382 | 1.628597  | 0.110509  |
| Ti | -5.015911 | 1.771421  | 0.835570  |
| O  | -7.935674 | -3.406978 | 1.036597  |
| O  | -3.929078 | 0.594017  | 0.069389  |
| O  | -3.618205 | -1.746143 | -1.461972 |
| Ti | -2.639130 | -0.617368 | -0.342730 |
| Ti | -5.849434 | -0.631579 | 3.555687  |
| O  | -7.619240 | -1.034917 | 3.138331  |
| O  | -2.913286 | -1.690554 | 1.365663  |
| O  | -1.988075 | -2.425414 | 3.629619  |
| O  | -4.805112 | -2.136378 | 3.528075  |
| Ti | -3.582336 | -3.008574 | 2.431683  |
| O  | -4.799653 | -4.068664 | 1.445930  |
| O  | -5.330701 | 0.616122  | 2.350281  |
| Ti | 0.614197  | 1.411136  | 4.298150  |
| O  | -0.044888 | 2.105860  | 5.872692  |
| Ti | -1.342371 | 3.163799  | 5.058439  |
| O  | -0.747251 | 2.377614  | 3.535133  |
| O  | -3.109916 | 2.626005  | 5.049230  |
| O  | 0.054791  | -0.295957 | 3.606729  |
| O  | -1.002152 | -0.101520 | 0.890564  |
| Ti | -1.561205 | -0.826519 | 2.730795  |
| O  | -2.742820 | 0.317400  | 3.400883  |
| O  | -4.057488 | 2.759489  | 2.277024  |
| Ti | -4.017565 | 1.567371  | 3.855223  |
| O  | -5.239404 | 0.568528  | 4.832639  |
| Ti | -0.683266 | -1.370750 | -4.274807 |
| O  | -0.035301 | -2.075485 | -5.844299 |
| Ti | 1.268111  | -3.138990 | -5.025707 |
| O  | 0.687106  | -2.341230 | -3.508812 |
| O  | 3.042450  | -2.622945 | -5.045732 |
| O  | -0.053503 | 0.315951  | -3.567140 |
| O  | 1.006163  | 0.111132  | -0.860824 |
| Ti | 1.563634  | 0.836149  | -2.704858 |
| O  | 2.717052  | -0.319492 | -3.402843 |
| O  | 4.029995  | -2.761238 | -2.281493 |
| Ti | 3.980697  | -1.571579 | -3.866884 |
| O  | 5.193201  | -0.578109 | -4.862026 |
| O  | 5.308123  | -0.625084 | -2.377199 |
| O  | 2.924744  | 1.691303  | -1.344301 |
| O  | 1.986634  | 2.438421  | -3.599497 |
| O  | 4.784112  | 2.133582  | -3.544160 |
| Ti | 3.583388  | 3.010134  | -2.420694 |
| O  | 4.815242  | 4.066795  | -1.467841 |

|    |           |           |           |
|----|-----------|-----------|-----------|
| Ti | 5.818042  | 0.622310  | -3.591212 |
| O  | 7.601722  | 1.010989  | -3.217803 |
| Ti | 7.938230  | 1.574443  | -1.498870 |
| Ti | 6.214003  | 3.450792  | -0.473021 |
| O  | 8.726171  | 0.397985  | -0.310705 |
| Ti | 7.678653  | -0.576819 | 0.885107  |
| O  | 6.655016  | 0.758144  | 1.522262  |
| O  | 5.954658  | 3.442773  | 1.368953  |
| Ti | 5.385629  | 1.878915  | 2.131712  |
| O  | 6.179206  | 1.680696  | -0.940545 |
| O  | 7.814778  | -1.616632 | 2.429360  |
| O  | 6.695436  | -1.651452 | -0.172318 |
| Ti | 5.001041  | -1.776279 | -0.854094 |
| O  | 7.950708  | 3.389800  | -1.116867 |
| O  | 3.936935  | -0.590922 | -0.059356 |
| O  | 3.626503  | 1.751117  | 1.486850  |
| Ti | 2.647798  | 0.621833  | 0.363623  |
| O  | 5.157756  | 1.475782  | 3.911103  |
| O  | 0.905474  | -4.926497 | -4.753136 |
| Ti | -2.147002 | -5.353210 | 0.519961  |
| Ti | -0.201837 | -7.107499 | -0.328903 |
| O  | -2.872370 | -4.406281 | -0.831785 |
| Ti | -1.941335 | -3.203798 | -1.944139 |
| O  | -0.715807 | -4.435784 | -2.469456 |
| O  | 0.210938  | -7.083041 | -2.129555 |
| Ti | 0.639091  | -5.486816 | -2.997538 |
| O  | -0.340741 | -5.326420 | 0.124200  |
| O  | -2.055658 | -2.328416 | -3.608794 |
| O  | -1.090063 | -2.033930 | -0.828015 |
| Ti | 0.492775  | -1.494467 | 0.190649  |
| O  | -1.985151 | -7.169504 | 0.194017  |
| O  | 1.604929  | -2.557391 | -0.711310 |
| O  | 2.210519  | -4.992352 | -2.243970 |
| Ti | 2.860563  | -3.807094 | -1.036326 |
| Ti | -0.482645 | -3.691860 | 3.128641  |
| O  | -2.230176 | -4.503986 | 2.217746  |
| O  | 2.434432  | -4.827418 | 0.529188  |
| O  | 3.335525  | -5.780950 | 2.623417  |
| O  | 0.409196  | -5.279880 | 2.863151  |
| Ti | 1.724087  | -5.973254 | 1.780883  |
| O  | 1.119215  | -7.489835 | 0.891507  |
| O  | 0.025974  | -2.453508 | 1.852878  |
| Ti | 6.252433  | -2.156387 | 3.246863  |
| O  | 5.773469  | -1.426466 | 4.901900  |
| Ti | 4.534196  | -0.248929 | 4.219970  |
| O  | 4.954101  | -0.989958 | 2.621566  |
| O  | 2.695641  | -0.585526 | 4.356837  |
| O  | 5.568528  | -3.762686 | 2.762011  |
| O  | 4.426418  | -3.404789 | 0.108535  |
| Ti | 3.942120  | -4.145914 | 1.921090  |
| O  | 2.848546  | -2.943106 | 2.644998  |
| O  | 1.747592  | -0.645418 | 1.462939  |



|    |          |           |          |
|----|----------|-----------|----------|
| Ti | 1.634419 | -1.671684 | 3.266747 |
| O  | 0.674801 | -2.883334 | 4.291283 |

48c

E = -48004.147612873196 Hartree

|    |           |           |           |
|----|-----------|-----------|-----------|
| Ti | 1.864172  | -4.945821 | -1.628152 |
| O  | 2.122674  | -6.239000 | -2.916039 |
| Ti | 2.040973  | -5.081716 | -4.376217 |
| O  | 1.930108  | -3.781973 | -3.089504 |
| O  | 0.464317  | -4.866160 | -5.257836 |
| O  | 0.189587  | -4.990986 | -0.946808 |
| O  | -0.415965 | -2.114627 | -0.877609 |
| Ti | -1.354484 | -3.985101 | -1.178551 |
| O  | -1.200246 | -3.994210 | -3.064116 |
| O  | -0.479081 | -2.041067 | -5.220333 |
| Ti | -1.038165 | -3.853248 | -4.848189 |
| O  | -2.469813 | -4.679392 | -5.713072 |
| O  | -2.979059 | -2.356225 | -4.798206 |
| O  | -2.929319 | -2.573984 | -1.483483 |
| O  | -2.891599 | -5.047976 | -1.004089 |
| O  | -4.297409 | -4.550350 | -3.442781 |
| Ti | -4.138245 | -3.955073 | -1.740136 |
| O  | -5.913911 | -3.596058 | -1.226908 |
| Ti | -3.973566 | -3.809865 | -5.063771 |
| O  | -5.638340 | -3.127660 | -5.633223 |
| Ti | -6.398605 | -1.794618 | -4.637420 |
| Ti | -6.541198 | -2.045076 | -1.882573 |
| O  | -6.305152 | -0.102240 | -5.337634 |
| Ti | -5.089183 | 1.099478  | -4.615179 |
| O  | -5.706155 | 1.106013  | -2.875167 |
| O  | -6.342908 | -0.669119 | -0.570424 |
| Ti | -5.207872 | 0.904833  | -1.145125 |
| O  | -5.265724 | -1.723528 | -3.153354 |
| O  | -4.725802 | 2.837892  | -5.086195 |
| O  | -3.500029 | 0.337241  | -5.090666 |
| Ti | -2.039980 | -0.704310 | -4.780393 |
| O  | -7.698194 | -2.112533 | -3.332847 |
| O  | -1.843650 | -0.565599 | -3.031889 |
| O  | -3.655769 | 0.063354  | -1.083248 |
| Ti | -2.063553 | -0.855617 | -1.270155 |
| O  | -4.634249 | 2.766532  | -0.857153 |
| O  | 3.607211  | -4.430009 | -5.136300 |
| Ti | 5.557070  | 0.676806  | -1.418704 |
| Ti | 5.191449  | 0.325026  | -4.199035 |
| O  | 5.343709  | -1.138906 | -0.882085 |
| Ti | 4.147363  | -2.690644 | -1.059111 |
| O  | 4.579586  | -3.136124 | -2.731791 |
| O  | 5.118611  | -1.394683 | -4.817915 |
| Ti | 3.905056  | -2.758767 | -4.423718 |
| O  | 4.083319  | 0.490467  | -2.712350 |
| O  | 3.236629  | -4.421439 | -0.447678 |
| O  | 2.556136  | -1.852117 | -1.074691 |

|    |           |           |           |
|----|-----------|-----------|-----------|
| Ti | 1.060236  | -0.825417 | -1.176897 |
| O  | 6.555887  | 0.706048  | -2.911805 |
| O  | 0.864621  | -0.836988 | -2.978767 |
| O  | 2.410400  | -1.897890 | -5.060993 |
| Ti | 0.985340  | -0.836254 | -4.741691 |
| Ti | 3.021695  | 2.276226  | -1.790539 |
| O  | 4.610180  | 2.282774  | -0.977532 |
| O  | 1.980849  | 0.804900  | -4.834868 |
| O  | 1.380550  | 3.104732  | -5.789233 |
| O  | 3.127651  | 3.041987  | -3.446117 |
| Ti | 2.904741  | 2.292402  | -5.072000 |
| O  | 4.648302  | 1.580967  | -5.378914 |
| O  | 1.905512  | 0.898106  | -0.978665 |
| Ti | -3.158187 | 3.487043  | -4.311349 |
| O  | -3.291567 | 4.824583  | -2.976133 |
| Ti | -3.061989 | 3.710623  | -1.563363 |
| O  | -2.976134 | 2.374548  | -2.945035 |
| O  | -1.280296 | 3.479492  | -1.160949 |
| O  | -1.546441 | 3.282351  | -5.209408 |
| O  | -0.559095 | 0.472832  | -5.344088 |
| Ti | -0.043055 | 2.279432  | -4.942942 |
| O  | 0.247687  | 2.265961  | -3.131911 |
| O  | -0.772698 | 0.600481  | -0.880082 |
| Ti | 0.109710  | 2.356287  | -1.310534 |
| O  | 1.689773  | 3.408746  | -0.967202 |
| Ti | 3.158287  | -3.486605 | 4.311121  |
| O  | 3.291429  | -4.824557 | 2.976275  |
| Ti | 3.061650  | -3.711074 | 1.563154  |
| O  | 2.976595  | -2.374573 | 2.944516  |
| O  | 1.279832  | -3.479730 | 1.161250  |
| O  | 1.546555  | -3.281624 | 5.208949  |
| O  | 0.559055  | -0.472292 | 5.344218  |
| Ti | 0.042975  | -2.278809 | 4.942704  |
| O  | -0.247792 | -2.265602 | 3.131758  |
| O  | 0.772124  | -0.600438 | 0.880153  |
| Ti | -0.110027 | -2.356346 | 1.310374  |
| O  | -1.690296 | -3.408883 | 0.967116  |
| O  | -1.906173 | -0.898087 | 0.978561  |
| O  | -1.980537 | -0.804813 | 4.834872  |
| O  | -1.380294 | -3.104628 | 5.789274  |
| O  | -3.127411 | -3.042024 | 3.446212  |
| Ti | -2.904564 | -2.292384 | 5.072089  |
| O  | -4.649019 | -1.582719 | 5.377982  |
| Ti | -3.022064 | -2.276397 | 1.790350  |
| O  | -4.610903 | -2.282908 | 0.978042  |
| Ti | -5.557570 | -0.677028 | 1.419205  |
| Ti | -5.191852 | -0.325367 | 4.199620  |
| O  | -5.344593 | 1.138713  | 0.882253  |
| Ti | -4.147826 | 2.690502  | 1.058993  |
| O  | -4.579436 | 3.135217  | 2.731946  |
| O  | -5.117896 | 1.393989  | 4.818348  |
| Ti | -3.905985 | 2.758638  | 4.424121  |

|    |           |           |          |
|----|-----------|-----------|----------|
| O  | -4.083888 | -0.490277 | 2.712686 |
| O  | -3.237084 | 4.421041  | 0.447707 |
| O  | -2.556871 | 1.851452  | 1.074795 |
| Ti | -1.060601 | 0.825231  | 1.176721 |
| O  | -6.556293 | -0.706153 | 2.912326 |
| O  | -0.864916 | 0.836805  | 2.978693 |
| O  | -2.410476 | 1.897918  | 5.061184 |
| Ti | -0.985136 | 0.836480  | 4.741516 |
| O  | -3.599073 | 4.423597  | 5.148088 |
| O  | 4.634082  | -2.767016 | 0.856969 |
| Ti | 6.397864  | 1.795324  | 4.637520 |
| Ti | 6.540438  | 2.044900  | 1.882514 |
| O  | 6.306347  | 0.102386  | 5.336819 |
| Ti | 5.088785  | -1.098788 | 4.615484 |
| O  | 5.705917  | -1.105701 | 2.875513 |
| O  | 6.342151  | 0.668731  | 0.570469 |
| Ti | 5.207043  | -0.905291 | 1.145364 |
| O  | 5.265103  | 1.723367  | 3.153400 |
| O  | 4.725698  | -2.837409 | 5.086363 |
| O  | 3.499423  | -0.337397 | 5.090673 |
| Ti | 2.040018  | 0.704777  | 4.780326 |
| O  | 7.697834  | 2.111327  | 3.332601 |
| O  | 1.843260  | 0.566082  | 3.031864 |
| O  | 3.654885  | -0.064008 | 1.083151 |
| Ti | 2.063095  | 0.855812  | 1.270043 |
| Ti | 3.973639  | 3.810521  | 5.063087 |
| O  | 5.649098  | 3.142485  | 5.618814 |
| O  | 2.928883  | 2.574059  | 1.483312 |
| O  | 2.891048  | 5.048010  | 1.003209 |
| O  | 4.295871  | 4.551141  | 3.441711 |
| Ti | 4.137893  | 3.955129  | 1.739286 |
| O  | 5.913464  | 3.595686  | 1.226366 |
| O  | 2.980006  | 2.356369  | 4.799371 |
| Ti | -1.864786 | 4.945412  | 1.628148 |
| O  | -2.123381 | 6.238650  | 2.915834 |
| Ti | -2.041341 | 5.081761  | 4.375901 |
| O  | -1.930495 | 3.781659  | 3.089552 |
| O  | -0.464334 | 4.866239  | 5.257562 |
| O  | -0.189996 | 4.991043  | 0.946890 |
| O  | 0.415434  | 2.114634  | 0.877594 |
| Ti | 1.354038  | 3.985137  | 1.178171 |
| O  | 1.199992  | 3.994554  | 3.063974 |
| O  | 0.479128  | 2.041249  | 5.220091 |
| Ti | 1.038073  | 3.853543  | 4.847902 |
| O  | 2.469905  | 4.679784  | 5.712686 |

60a

E = -60005.487142286533 Hartree

|    |           |          |           |
|----|-----------|----------|-----------|
| Ti | -5.673310 | 5.132135 | -1.800228 |
| O  | -5.730759 | 4.868719 | -0.000604 |
| O  | -7.107936 | 4.133953 | 2.389028  |
| Ti | -5.671763 | 5.134396 | 1.798549  |

|    |           |          |           |
|----|-----------|----------|-----------|
| O  | -5.378740 | 6.937476 | 2.077197  |
| O  | -5.380106 | 6.934674 | -2.081988 |
| O  | -4.083215 | 4.468466 | -2.422135 |
| Ti | -2.552500 | 3.708724 | -1.809328 |
| O  | -2.660514 | 3.715349 | -0.001397 |
| O  | -4.080980 | 4.471641 | 2.419886  |
| Ti | -2.551188 | 3.710686 | 1.806499  |
| O  | -0.895673 | 2.667956 | 2.278437  |
| O  | -0.897150 | 2.665193 | -2.280492 |
| Ti | -3.853965 | 7.702871 | -1.368829 |
| O  | -4.145895 | 8.915636 | -0.004486 |
| Ti | -3.853438 | 7.704914 | 1.361536  |
| O  | -3.479439 | 6.542170 | -0.002804 |
| O  | -2.247367 | 7.754971 | 2.269730  |
| O  | -2.248298 | 7.751571 | -2.277694 |
| O  | -1.154548 | 5.091663 | -2.094423 |
| Ti | -0.656986 | 6.956105 | -1.793654 |
| O  | -0.634780 | 7.261152 | -0.004046 |
| O  | -1.152953 | 5.094334 | 2.088890  |
| Ti | -0.656687 | 6.958458 | 1.786035  |
| O  | 0.803796  | 7.878396 | 2.469422  |
| O  | 1.252468  | 5.615253 | 1.434415  |
| O  | 1.250260  | 5.614340 | -1.441302 |
| O  | 0.803028  | 7.875957 | -2.478548 |
| O  | 2.583458  | 7.702983 | -0.004605 |
| Ti | 2.283003  | 7.057545 | -1.688182 |
| Ti | 2.283893  | 7.059376 | 1.679860  |
| Ti | 0.480242  | 3.893788 | 1.719954  |
| O  | 0.523587  | 3.355684 | -0.001897 |
| Ti | 0.478899  | 3.891815 | -1.724381 |
| O  | -7.110451 | 4.131235 | -2.387609 |
| O  | 1.938276  | 3.172968 | -2.559095 |
| Ti | 3.370754  | 2.348339 | -1.810086 |
| O  | 3.297460  | 2.572553 | -0.002040 |
| O  | 1.939515  | 3.174846 | 2.555068  |
| Ti | 3.371710  | 2.349782 | 1.806334  |
| O  | 4.972587  | 1.218137 | 2.350122  |
| O  | 4.971438  | 1.216324 | -2.352743 |
| O  | 3.897100  | 6.481030 | 2.395218  |
| O  | 3.896513  | 6.478968 | -2.402533 |
| O  | 4.811843  | 3.660319 | -2.162932 |
| Ti | 5.334797  | 5.499473 | -1.818565 |
| O  | 5.242087  | 5.712614 | -0.003387 |
| O  | 4.812658  | 3.662177 | 2.157794  |
| Ti | 5.335262  | 5.501183 | 1.812048  |
| O  | 6.876153  | 6.347940 | 2.447716  |
| O  | 7.194920  | 4.054511 | 1.453658  |
| O  | 7.193735  | 4.053796 | -1.458963 |
| O  | 6.875493  | 6.346160 | -2.455119 |
| O  | 8.605238  | 6.120264 | -0.003630 |
| Ti | 8.298516  | 5.443331 | -1.672545 |
| O  | 9.885036  | 4.661218 | -2.283566 |

|    |            |           |           |
|----|------------|-----------|-----------|
| Ti | 8.299225   | 5.444391  | 1.665915  |
| O  | 9.888923   | 4.666255  | 2.273556  |
| Ti | 10.625103  | 3.228571  | 1.372071  |
| Ti | 10.624712  | 3.227766  | -1.378520 |
| O  | 10.597332  | 1.530889  | 2.108842  |
| Ti | 9.165922   | 0.391953  | 1.803237  |
| O  | 9.020053   | 0.229812  | -0.002090 |
| O  | 10.596244  | 1.529607  | -2.114464 |
| Ti | 9.164960   | 0.390923  | -1.807539 |
| O  | 9.428914   | 3.036160  | -0.003052 |
| O  | 7.778363   | 1.407979  | 2.407763  |
| Ti | 6.395139   | 2.366519  | 1.719384  |
| O  | 11.838403  | 3.516173  | -0.003601 |
| O  | 6.310083   | 1.849285  | -0.001788 |
| O  | 7.777347   | 1.407005  | -2.411899 |
| Ti | 6.394141   | 2.365387  | -1.723369 |
| Ti | -7.481141  | 2.399571  | -1.823419 |
| O  | -7.534725  | 2.434496  | 0.002114  |
| O  | -8.900480  | 1.348615  | 2.387513  |
| Ti | -7.479113  | 2.401305  | 1.827656  |
| O  | -5.999998  | 1.461497  | -2.291937 |
| Ti | -4.487992  | 0.565477  | -1.791789 |
| O  | -4.638573  | 0.581650  | 0.001156  |
| O  | -5.997411  | 1.463925  | 2.295243  |
| Ti | -4.486265  | 0.567117  | 1.793892  |
| O  | -2.705132  | -0.539746 | 1.932893  |
| O  | -2.706970  | -0.541768 | -1.930430 |
| O  | -3.164824  | 1.877826  | -2.151556 |
| O  | -3.163145  | 1.880265  | 2.150676  |
| Ti | -1.422477  | 0.844722  | 1.789010  |
| O  | -1.153399  | 0.888765  | -0.000151 |
| Ti | -1.423993  | 0.842646  | -1.789122 |
| Ti | -10.627145 | -3.230062 | -1.368159 |
| Ti | -10.625204 | -3.228859 | 1.382132  |
| O  | -10.597921 | -1.531328 | -2.102490 |
| Ti | -9.165283  | -0.393843 | -1.800056 |
| O  | -9.013032  | -0.231687 | 0.004507  |
| O  | -10.595584 | -1.529257 | 2.114674  |
| Ti | -9.162947  | -0.392355 | 1.809456  |
| O  | -9.429650  | -3.039095 | 0.006070  |
| O  | -8.903007  | 1.346214  | -2.380554 |
| O  | -7.780085  | -1.410633 | -2.407745 |
| Ti | -6.396235  | -2.367313 | -1.717988 |
| O  | -11.839893 | -3.517137 | 0.008000  |
| O  | -6.311153  | -1.850012 | 0.002989  |
| O  | -7.777081  | -1.409004 | 2.415676  |
| Ti | -6.394289  | -2.366148 | 1.724581  |
| Ti | -8.300461  | -5.445304 | -1.663213 |
| O  | -9.888984  | -4.664178 | -2.273073 |
| O  | -7.192752  | -4.055141 | 1.461590  |
| O  | -6.875096  | -6.347626 | 2.455501  |
| O  | -8.605447  | -6.120762 | 0.006336  |

|    |           |           |           |
|----|-----------|-----------|-----------|
| Ti | -8.298356 | -5.444179 | 1.675030  |
| O  | -9.886053 | -4.662858 | 2.286477  |
| O  | -7.194939 | -4.055815 | -1.452783 |
| O  | -3.898610 | -6.482317 | -2.393985 |
| O  | -3.896321 | -6.480966 | 2.401217  |
| O  | -4.810984 | -3.661664 | 2.164782  |
| Ti | -5.334390 | -5.499414 | 1.819282  |
| O  | -5.241305 | -5.709678 | 0.004158  |
| O  | -4.813306 | -3.663624 | -2.158450 |
| Ti | -5.336392 | -5.501098 | -1.811121 |
| O  | -6.878036 | -6.349344 | -2.444708 |
| O  | -4.973999 | -1.220039 | -2.347755 |
| O  | -4.971708 | -1.217993 | 2.351662  |
| O  | -1.937818 | -3.174344 | 2.557626  |
| Ti | -3.371100 | -2.349139 | 1.810610  |
| O  | -3.298425 | -2.572066 | 0.002028  |
| O  | -1.940091 | -3.175920 | -2.554736 |
| Ti | -3.372927 | -2.350847 | -1.806804 |
| O  | -0.001111 | -0.001261 | -2.539286 |
| Ti | 1.422656  | -0.844646 | -1.789444 |
| O  | 1.151838  | -0.890505 | -0.000249 |
| O  | 0.000974  | 0.001327  | 2.538971  |
| Ti | 1.423807  | -0.843114 | 1.788772  |
| O  | 3.163723  | -1.876928 | 2.151992  |
| O  | 3.162399  | -1.878701 | -2.151985 |
| O  | 2.704452  | 0.540118  | -1.929849 |
| O  | 2.705727  | 0.541702  | 1.927153  |
| O  | 8.900853  | -1.348120 | 2.379442  |
| Ti | 7.479936  | -2.404135 | 1.824158  |
| O  | 7.532593  | -2.445157 | -0.001261 |
| O  | 8.899929  | -1.349771 | -2.383061 |
| Ti | 7.478898  | -2.405111 | -1.826725 |
| O  | 7.106163  | -4.134359 | 2.390965  |
| O  | 5.999705  | -1.465137 | 2.289752  |
| Ti | 4.487218  | -0.566087 | 1.791746  |
| O  | 4.638174  | -0.579753 | -0.000944 |
| O  | 5.998223  | -1.466693 | -2.292014 |
| Ti | 4.486050  | -0.567473 | -1.793492 |
| Ti | -0.479646 | -3.894294 | -1.721378 |
| O  | -0.521807 | -3.357029 | 0.000803  |
| Ti | -0.478160 | -3.893089 | 1.723451  |
| Ti | -2.284252 | -7.059737 | -1.680775 |
| O  | -1.248707 | -5.616193 | 1.439808  |
| O  | -0.802426 | -7.878223 | 2.475841  |
| O  | -2.583879 | -7.703819 | 0.003393  |
| Ti | -2.282662 | -7.058612 | 1.686815  |
| O  | -1.250755 | -5.616735 | -1.435840 |
| Ti | 3.854256  | -7.703128 | 1.365522  |
| O  | 4.145188  | -8.915306 | 0.000829  |
| Ti | 3.853386  | -7.704011 | -1.364361 |
| O  | 3.481589  | -6.540708 | 0.000296  |
| O  | 2.247217  | -7.753400 | -2.271667 |

|    |           |           |           |
|----|-----------|-----------|-----------|
| O  | 2.248979  | -7.751569 | 2.274286  |
| O  | 1.154256  | -5.092720 | 2.094726  |
| Ti | 0.656688  | -6.956244 | 1.791826  |
| O  | 0.635588  | -7.258549 | 0.001863  |
| O  | 1.152483  | -5.094418 | -2.092378 |
| Ti | 0.655446  | -6.957739 | -1.788389 |
| O  | -0.804511 | -7.880105 | -2.470065 |
| O  | 0.895033  | -2.668157 | -2.279920 |
| O  | 0.896405  | -2.666336 | 2.280232  |
| Ti | 5.671174  | -5.132460 | 1.797860  |
| O  | 5.728353  | -4.860847 | -0.000659 |
| O  | 7.104574  | -4.135466 | -2.393065 |
| Ti | 5.669965  | -5.133497 | -1.798961 |
| O  | 5.379271  | -6.936433 | -2.077591 |
| O  | 5.380523  | -6.935249 | 2.077409  |
| O  | 4.079876  | -4.470554 | 2.422643  |
| Ti | 2.551127  | -3.710213 | 1.808767  |
| O  | 2.657869  | -3.716692 | 0.000318  |
| O  | 4.078025  | -4.472164 | -2.422986 |
| Ti | 2.549767  | -3.711666 | -1.808159 |

64a

E = -64005.820290843956 Hartree

|    |           |           |           |
|----|-----------|-----------|-----------|
| Ti | -1.845405 | -5.302604 | -5.235327 |
| O  | -2.082845 | -5.273827 | -3.433067 |
| O  | -3.665194 | -5.486508 | -1.100088 |
| Ti | -1.907942 | -5.474469 | -1.652038 |
| O  | -0.722968 | -6.830500 | -1.269724 |
| O  | -0.525558 | -6.602472 | -5.416631 |
| O  | -0.925501 | -3.813744 | -5.671349 |
| Ti | -0.098871 | -2.334617 | -4.947302 |
| O  | -0.215351 | -2.495510 | -3.189241 |
| O  | -1.048870 | -4.002731 | -0.919115 |
| Ti | -0.092934 | -2.460376 | -1.331719 |
| O  | 0.766266  | -0.527275 | -0.879393 |
| O  | 0.702780  | -0.510801 | -5.218083 |
| Ti | 1.086294  | -6.409276 | -4.536877 |
| O  | 1.534524  | -7.601221 | -3.162808 |
| Ti | 1.007091  | -6.497886 | -1.798312 |
| O  | 0.672087  | -5.298900 | -3.113160 |
| O  | 2.225253  | -5.638331 | -0.597085 |
| O  | 2.429699  | -5.526290 | -5.381090 |
| O  | 1.841954  | -2.710620 | -5.260738 |
| Ti | 3.315590  | -3.979200 | -4.822445 |
| O  | 3.322695  | -4.315358 | -3.048692 |
| O  | 1.778239  | -2.788585 | -1.292832 |
| Ti | 3.339844  | -4.138654 | -1.206374 |
| O  | 5.168772  | -4.408083 | -1.078240 |
| O  | 4.178877  | -2.090098 | -1.100426 |
| O  | 4.096620  | -1.963363 | -4.426865 |
| O  | 5.088133  | -4.011843 | -5.415087 |
| O  | 6.497358  | -2.842629 | -2.965508 |

|    |           |           |           |
|----|-----------|-----------|-----------|
| Ti | 5.816175  | -2.495608 | -4.616357 |
| O  | 6.740966  | -1.039388 | -5.310183 |
| Ti | 5.914151  | -2.728796 | -1.222786 |
| O  | 6.980076  | -0.991283 | -0.860264 |
| Ti | 6.876281  | 0.785075  | -1.672424 |
| Ti | 6.655935  | 0.580748  | -4.419701 |
| O  | 5.846338  | 2.303054  | -1.370469 |
| Ti | 4.018088  | 2.364147  | -1.513956 |
| O  | 3.730812  | 2.214489  | -3.309716 |
| O  | 5.727071  | 1.923408  | -5.287179 |
| Ti | 3.889177  | 2.167525  | -5.094376 |
| O  | 5.674419  | 0.134289  | -2.975615 |
| O  | 2.852608  | 3.777374  | -1.226741 |
| O  | 3.390809  | 0.747862  | -0.815278 |
| Ti | 2.582148  | -0.937471 | -1.319654 |
| O  | 7.937503  | 1.084432  | -3.113291 |
| O  | 2.394858  | -0.476466 | -3.022816 |
| O  | 3.269968  | 0.533856  | -5.633721 |
| Ti | 2.532347  | -0.882000 | -4.780389 |
| Ti | -7.522908 | -2.264421 | -4.479831 |
| Ti | -7.460931 | -2.497801 | -1.740930 |
| O  | -6.641347 | -3.592587 | -5.400747 |
| Ti | -4.800679 | -3.899861 | -5.219466 |
| O  | -4.628031 | -4.087084 | -3.418611 |
| O  | -6.595476 | -4.036103 | -1.241006 |
| Ti | -4.794551 | -4.137976 | -1.627407 |
| O  | -6.380239 | -1.887911 | -3.072779 |
| O  | -3.597244 | -5.161898 | -5.868337 |
| O  | -4.132642 | -2.291632 | -5.667017 |
| Ti | -3.442585 | -0.814087 | -4.824133 |
| O  | -8.679205 | -2.759249 | -3.104810 |
| O  | -3.366237 | -1.176515 | -3.095995 |
| O  | -4.145679 | -2.588127 | -0.853828 |
| Ti | -3.411310 | -0.930100 | -1.279806 |
| Ti | -6.745015 | 0.828164  | -4.525925 |
| O  | -7.717791 | -0.595998 | -5.234879 |
| O  | -4.992754 | 0.267247  | -1.295125 |
| O  | -6.007561 | 2.560405  | -0.805275 |
| O  | -7.357906 | 1.013262  | -2.788464 |
| Ti | -6.735567 | 0.704222  | -1.082460 |
| O  | -7.494236 | -1.044367 | -0.539753 |
| O  | -5.053100 | 0.232269  | -4.645559 |
| Ti | -1.913097 | 5.007903  | -1.574170 |
| O  | -2.401099 | 6.049368  | -2.974400 |
| Ti | -2.019137 | 4.771340  | -4.325330 |
| O  | -1.674107 | 3.707341  | -2.934151 |
| O  | -3.385647 | 3.882344  | -5.241182 |
| O  | -3.301194 | 3.822680  | -0.831390 |
| O  | -2.627603 | 1.059507  | -0.930009 |
| Ti | -4.189181 | 2.252930  | -1.311387 |
| O  | -4.277352 | 2.419557  | -3.068075 |
| O  | -2.752186 | 1.060405  | -5.229719 |



|    |           |           |           |
|----|-----------|-----------|-----------|
| Ti | -4.247684 | 2.309650  | -4.887495 |
| O  | -6.082063 | 2.389142  | -5.294629 |
| O  | -1.604362 | -1.125666 | -5.322370 |
| O  | -1.550243 | -1.174073 | -1.226174 |
| Ti | 1.044865  | 3.770678  | -1.505859 |
| O  | 1.088413  | 3.432355  | -3.297162 |
| O  | 2.666120  | 3.450186  | -5.690170 |
| Ti | 0.909893  | 3.594978  | -5.074770 |
| O  | -0.404417 | 4.915548  | -5.208843 |
| O  | -0.101095 | 5.203706  | -1.320426 |
| O  | 0.107340  | 2.294505  | -0.823644 |
| Ti | -0.750023 | 0.670746  | -1.324992 |
| O  | -0.698754 | 0.819516  | -3.120206 |
| O  | -0.026553 | 2.133758  | -5.646321 |
| Ti | -0.820786 | 0.670563  | -4.927916 |
| Ti | -1.044697 | -3.770414 | 1.505984  |
| O  | -1.088393 | -3.432206 | 3.297220  |
| O  | -2.666773 | -3.449989 | 5.689987  |
| Ti | -0.910483 | -3.594888 | 5.074881  |
| O  | 0.403789  | -4.915621 | 5.208722  |
| O  | 0.101260  | -5.203410 | 1.320118  |
| O  | -0.107216 | -2.294388 | 0.823412  |
| Ti | 0.749910  | -0.670520 | 1.324877  |
| O  | 0.698254  | -0.819474 | 3.120023  |
| O  | 0.025617  | -2.133494 | 5.646420  |
| Ti | 0.820222  | -0.670631 | 4.927741  |
| O  | 1.603910  | 1.125511  | 5.322110  |
| O  | 1.550341  | 1.174311  | 1.226212  |
| Ti | 1.913198  | -5.007558 | 1.574177  |
| O  | 2.400965  | -6.048964 | 2.974517  |
| Ti | 2.018567  | -4.770962 | 4.325477  |
| O  | 1.673968  | -3.707121 | 2.934033  |
| O  | 3.387507  | -3.884363 | 5.239823  |
| O  | 3.301280  | -3.822512 | 0.830955  |
| O  | 2.627580  | -1.059364 | 0.929927  |
| Ti | 4.189447  | -2.252783 | 1.311141  |
| O  | 4.277511  | -2.419951 | 3.067866  |
| O  | 2.751400  | -1.060759 | 5.229374  |
| Ti | 4.247109  | -2.309906 | 4.887367  |
| O  | 6.081337  | -2.389846 | 5.294817  |
| O  | 5.052527  | -0.232896 | 4.646060  |
| O  | 4.992886  | -0.267150 | 1.295240  |
| O  | 6.007694  | -2.560178 | 0.804662  |
| O  | 7.357282  | -1.013511 | 2.789113  |
| Ti | 6.736007  | -0.703594 | 1.082811  |
| O  | 7.495161  | 1.044225  | 0.542244  |
| Ti | 6.744615  | -0.828755 | 4.526709  |
| O  | 7.716887  | 0.594940  | 5.237144  |
| Ti | 7.522882  | 2.263656  | 4.482399  |
| Ti | 7.461910  | 2.497151  | 1.743527  |
| O  | 6.640959  | 3.591795  | 5.403205  |
| Ti | 4.800514  | 3.899374  | 5.220723  |

|    |           |           |          |
|----|-----------|-----------|----------|
| O  | 4.628567  | 4.086572  | 3.419726 |
| O  | 6.596542  | 4.035300  | 1.242941 |
| Ti | 4.795458  | 4.137423  | 1.628551 |
| O  | 6.380626  | 1.887439  | 3.075108 |
| O  | 3.596970  | 5.161899  | 5.868604 |
| O  | 4.132133  | 2.291008  | 5.667390 |
| Ti | 3.442098  | 0.813705  | 4.824065 |
| O  | 8.679770  | 2.758381  | 3.108002 |
| O  | 3.366293  | 1.176557  | 3.096010 |
| O  | 4.146213  | 2.588083  | 0.854151 |
| Ti | 3.411465  | 0.930127  | 1.279881 |
| Ti | -6.876541 | -0.785452 | 1.670497 |
| Ti | -6.656223 | -0.580280 | 4.417793 |
| O  | -5.845851 | -2.303622 | 1.370526 |
| Ti | -4.017785 | -2.363905 | 1.513952 |
| O  | -3.730168 | -2.213674 | 3.309630 |
| O  | -5.727523 | -1.922886 | 5.285697 |
| Ti | -3.889541 | -2.166923 | 5.094142 |
| O  | -5.674523 | -0.134150 | 2.974169 |
| O  | -2.852303 | -3.777201 | 1.226812 |
| O  | -3.390996 | -0.747419 | 0.815103 |
| Ti | -2.582212 | 0.937843  | 1.319512 |
| O  | -7.937690 | -1.084594 | 3.111142 |
| O  | -2.395106 | 0.476912  | 3.022658 |
| O  | -3.270988 | -0.533042 | 5.633671 |
| Ti | -2.532793 | 0.882462  | 4.780237 |
| Ti | -5.914178 | 2.729245  | 1.222449 |
| O  | -6.980131 | 0.992345  | 0.859993 |
| O  | -4.096945 | 1.963842  | 4.426176 |
| O  | -5.087648 | 4.011129  | 5.416107 |
| O  | -6.497505 | 2.843713  | 2.964930 |
| Ti | -5.816454 | 2.496076  | 4.615665 |
| O  | -6.740706 | 1.039464  | 5.309369 |
| O  | -4.178912 | 2.090511  | 1.100167 |
| Ti | -1.086101 | 6.409355  | 4.536057 |
| O  | -1.533687 | 7.601329  | 3.161697 |
| Ti | -1.006339 | 6.497725  | 1.797510 |
| O  | -0.672033 | 5.298803  | 3.112525 |
| O  | -2.225015 | 5.638576  | 0.596356 |
| O  | -2.430420 | 5.527446  | 5.379954 |
| O  | -1.842310 | 2.711071  | 5.260443 |
| Ti | -3.315741 | 3.979763  | 4.821915 |
| O  | -3.322875 | 4.315835  | 3.048148 |
| O  | -1.778227 | 2.788839  | 1.292451 |
| Ti | -3.339964 | 4.138993  | 1.205940 |
| O  | -5.168720 | 4.408594  | 1.077474 |
| O  | -0.766205 | 0.527649  | 0.879318 |
| O  | -0.703289 | 0.511051  | 5.217946 |
| Ti | 1.845229  | 5.302050  | 5.235285 |
| O  | 2.082931  | 5.272629  | 3.433001 |
| O  | 3.666427  | 5.486150  | 1.100829 |
| Ti | 1.908830  | 5.473869  | 1.651960 |

|    |          |          |          |
|----|----------|----------|----------|
| O  | 0.724029 | 6.830027 | 1.269561 |
| O  | 0.525797 | 6.602503 | 5.415719 |
| O  | 0.924940 | 3.813583 | 5.671701 |
| Ti | 0.098532 | 2.334638 | 4.947112 |
| O  | 0.215295 | 2.495800 | 3.189089 |
| O  | 1.049165 | 4.002722 | 0.918525 |
| Ti | 0.092958 | 2.460594 | 1.331586 |

64b

E = -64005.817520706645 Hartree

|    |           |           |           |
|----|-----------|-----------|-----------|
| O  | 1.144777  | 0.345952  | 2.193492  |
| O  | 1.150779  | 0.344713  | -2.190628 |
| O  | 3.338436  | 3.316047  | 1.410553  |
| O  | 3.333226  | 3.321194  | -1.400651 |
| O  | 4.661826  | 5.438410  | 0.009868  |
| Ti | 4.345390  | 4.774579  | -1.658148 |
| Ti | 4.340099  | 4.773223  | 1.676187  |
| Ti | 2.548913  | 1.616635  | 1.722515  |
| O  | 2.610080  | 1.068016  | 0.003324  |
| Ti | 2.552139  | 1.616079  | -1.715014 |
| O  | -2.871377 | -5.601939 | 2.423644  |
| O  | 0.065509  | -5.633706 | -2.431303 |
| O  | 0.056234  | -5.631786 | 2.431749  |
| O  | -0.942581 | -2.816993 | 2.154909  |
| Ti | -1.379307 | -4.692428 | 1.809237  |
| O  | -1.246189 | -4.900841 | -0.002654 |
| O  | -0.936707 | -2.818641 | -2.159407 |
| Ti | -1.371690 | -4.693624 | -1.814892 |
| O  | -2.864256 | -5.599870 | -2.435081 |
| O  | 1.919085  | -2.304327 | 2.545944  |
| Ti | 0.472879  | -1.452328 | 1.823803  |
| O  | 0.572194  | -1.559073 | 0.000137  |
| O  | 1.927703  | -2.305784 | -2.537338 |
| Ti | 0.477791  | -1.454125 | -1.822319 |
| O  | 3.995390  | 0.900339  | -2.555223 |
| Ti | 5.438245  | 0.070669  | -1.811570 |
| O  | 5.328180  | 0.171820  | 0.011081  |
| O  | 3.985849  | 0.897702  | 2.570761  |
| Ti | 5.433734  | 0.070218  | 1.834105  |
| O  | 7.046653  | -1.051218 | 2.278556  |
| O  | 7.052612  | -1.050048 | -2.250100 |
| O  | 5.940336  | 4.213894  | 2.435076  |
| O  | 5.947936  | 4.212831  | -2.409356 |
| O  | 6.848594  | 1.399128  | -2.129874 |
| Ti | 7.378732  | 3.255344  | -1.797052 |
| O  | 7.251268  | 3.474788  | 0.015561  |
| O  | 6.842023  | 1.398498  | 2.157013  |
| Ti | 7.372433  | 3.255220  | 1.828799  |
| O  | 8.887723  | 4.157620  | 2.462660  |
| O  | 9.210963  | 1.867275  | 1.481504  |
| O  | 9.213117  | 1.870562  | -1.446428 |
| O  | 8.894625  | 4.160737  | -2.426359 |

|    |           |           |           |
|----|-----------|-----------|-----------|
| O  | 10.599352 | 3.962284  | 0.020458  |
| Ti | 10.315994 | 3.273609  | -1.644973 |
| O  | 11.933871 | 2.571073  | -2.273289 |
| Ti | 10.311525 | 3.270818  | 1.684215  |
| O  | 11.938480 | 2.580391  | 2.302286  |
| Ti | 12.730343 | 1.182712  | 1.397211  |
| Ti | 12.734143 | 1.184345  | -1.358272 |
| O  | 12.723247 | -0.501492 | 2.160207  |
| Ti | 11.323120 | -1.670301 | 1.827752  |
| O  | 11.257650 | -1.827807 | 0.015638  |
| O  | 12.727407 | -0.498677 | -2.124594 |
| Ti | 11.326519 | -1.667848 | -1.795893 |
| O  | 11.537313 | 0.970315  | 0.017656  |
| O  | 11.011020 | -3.390373 | 2.441723  |
| O  | 9.886915  | -0.726134 | 2.430880  |
| Ti | 8.455339  | 0.141787  | 1.728866  |
| O  | 13.939739 | 1.498080  | 0.021061  |
| O  | 8.449669  | -0.388496 | 0.015365  |
| O  | 9.892295  | -0.720804 | -2.399878 |
| Ti | 8.459002  | 0.144026  | -1.697465 |
| Ti | 3.403328  | -2.984559 | -1.713478 |
| O  | 3.289807  | -2.464927 | 0.007408  |
| Ti | 3.397933  | -2.983837 | 1.728939  |
| Ti | 1.665231  | -6.198019 | -1.676748 |
| O  | 2.678559  | -4.744621 | 1.448059  |
| O  | 3.133386  | -7.013957 | 2.471903  |
| O  | 1.347309  | -6.842042 | 0.004823  |
| Ti | 1.659850  | -6.196618 | 1.686681  |
| O  | 2.682339  | -4.745402 | -1.436303 |
| Ti | 7.739360  | -6.908326 | 1.378080  |
| O  | 8.002825  | -8.127369 | 0.010849  |
| Ti | 7.743438  | -6.907657 | -1.356557 |
| O  | 7.412198  | -5.732966 | 0.010546  |
| O  | 6.146915  | -6.886332 | -2.272941 |
| O  | 6.141062  | -6.886536 | 2.291736  |
| O  | 5.048670  | -4.186558 | 2.151234  |
| Ti | 4.573178  | -6.055297 | 1.804602  |
| O  | 4.571739  | -6.327956 | 0.008518  |
| O  | 5.054417  | -4.185929 | -2.129931 |
| Ti | 4.578101  | -6.055773 | -1.787017 |
| O  | 3.140268  | -7.014610 | -2.458582 |
| O  | 4.775104  | -1.732421 | -2.168845 |
| O  | 4.768923  | -1.732969 | 2.188191  |
| Ti | 9.584520  | -4.391503 | 1.815711  |
| O  | 9.734260  | -4.220696 | 0.013589  |
| O  | 11.015377 | -3.387237 | -2.412303 |
| Ti | 9.588706  | -4.389949 | -1.788679 |
| O  | 9.261420  | -6.177343 | -2.116082 |
| O  | 9.256008  | -6.179013 | 2.140865  |
| O  | 7.996714  | -3.650803 | 2.345263  |
| Ti | 6.446695  | -2.849372 | 1.821358  |
| O  | 6.515261  | -2.837113 | 0.012778  |

|    |            |           |           |
|----|------------|-----------|-----------|
| O  | 8.001407   | -3.649226 | -2.319600 |
| Ti | 6.451243   | -2.848365 | -1.796087 |
| Ti | -9.584458  | 4.391109  | -1.817090 |
| O  | -9.734085  | 4.222518  | -0.014744 |
| O  | -11.013890 | 3.390493  | 2.413027  |
| Ti | -9.587832  | 4.392868  | 1.787389  |
| O  | -9.259978  | 6.180505  | 2.113106  |
| O  | -9.255210  | 6.178016  | -2.144576 |
| O  | -7.997216  | 3.649161  | -2.346314 |
| Ti | -6.447074  | 2.847819  | -1.822466 |
| O  | -6.514438  | 2.837381  | -0.013836 |
| O  | -8.000691  | 3.651837  | 2.317777  |
| Ti | -6.450753  | 2.849746  | 1.795050  |
| O  | -4.774798  | 1.733653  | 2.168042  |
| O  | -4.769791  | 1.730802  | -2.189270 |
| Ti | -7.737996  | 6.907379  | -1.382762 |
| O  | -8.000732  | 8.128039  | -0.016833 |
| Ti | -7.742179  | 6.909621  | 1.351992  |
| O  | -7.411702  | 5.733250  | -0.013902 |
| O  | -6.145675  | 6.888366  | 2.268152  |
| O  | -6.139741  | 6.884169  | -2.296348 |
| O  | -5.048357  | 4.184332  | -2.154237 |
| Ti | -4.571677  | 6.053223  | -1.808857 |
| O  | -4.570976  | 6.326591  | -0.012848 |
| O  | -5.053636  | 4.187035  | 2.127977  |
| Ti | -4.577342  | 6.056328  | 1.782899  |
| O  | -3.139751  | 7.015348  | 2.454506  |
| O  | -2.681794  | 4.745413  | 1.433076  |
| O  | -2.678326  | 4.742730  | -1.451551 |
| O  | -3.131777  | 7.011617  | -2.476359 |
| O  | -1.346410  | 6.840638  | -0.008792 |
| Ti | -1.658495  | 6.194098  | -1.690299 |
| Ti | -1.664899  | 6.198284  | 1.673293  |
| Ti | -3.402900  | 2.984966  | 1.711215  |
| O  | -3.290338  | 2.464132  | -0.009515 |
| Ti | -3.398640  | 2.982126  | -1.731374 |
| Ti | -12.731288 | -1.182267 | -1.390992 |
| Ti | -12.733646 | -1.181330 | 1.364222  |
| O  | -12.723788 | 0.501392  | -2.155608 |
| Ti | -11.323217 | 1.670202  | -1.825146 |
| O  | -11.255633 | 1.828957  | -0.013197 |
| O  | -12.726611 | 0.502612  | 2.128640  |
| Ti | -11.325043 | 1.670581  | 1.798511  |
| O  | -11.537418 | -0.968608 | -0.012341 |
| O  | -11.011426 | 3.389346  | -2.441269 |
| O  | -9.888096  | 0.724487  | -2.428512 |
| Ti | -8.456198  | -0.142595 | -1.726128 |
| O  | -13.940055 | -1.495677 | -0.014141 |
| O  | -8.449329  | 0.389508  | -0.013368 |
| O  | -9.891142  | 0.723157  | 2.402693  |
| Ti | -8.458674  | -0.142488 | 1.699756  |
| Ti | -10.312762 | -3.271308 | -1.678030 |

|    |            |           |           |
|----|------------|-----------|-----------|
| O  | -11.932010 | -2.570280 | -2.304236 |
| O  | -9.212887  | -1.868957 | 1.448948  |
| O  | -8.894238  | -4.158047 | 2.431594  |
| O  | -10.600086 | -3.961458 | -0.014071 |
| Ti | -10.315884 | -3.271290 | 1.650506  |
| O  | -11.932072 | -2.566460 | 2.280710  |
| O  | -9.212108  | -1.867566 | -1.476524 |
| O  | -5.942132  | -4.216017 | -2.431284 |
| O  | -5.949013  | -4.214533 | 2.411747  |
| O  | -6.848413  | -1.397432 | 2.132544  |
| Ti | -7.378134  | -3.253748 | 1.800733  |
| O  | -7.251315  | -3.474137 | -0.011797 |
| O  | -6.843567  | -1.399790 | -2.154500 |
| Ti | -7.373392  | -3.255982 | -1.824928 |
| O  | -8.889270  | -4.158301 | -2.457388 |
| O  | -7.047616  | 1.049693  | -2.277862 |
| O  | -7.052085  | 1.051967  | 2.250519  |
| O  | -3.994802  | -0.898715 | 2.554902  |
| Ti | -5.437940  | -0.069354 | 1.812126  |
| O  | -5.328035  | -0.171977 | -0.010578 |
| O  | -3.987641  | -0.900486 | -2.570987 |
| Ti | -5.434630  | -0.071706 | -1.833593 |
| O  | -1.920129  | 2.301973  | -2.548480 |
| Ti | -0.473616  | 1.451028  | -1.825858 |
| O  | -0.572126  | 1.557807  | -0.002138 |
| O  | -1.927803  | 2.305345  | 2.535191  |
| Ti | -0.478371  | 1.452544  | 1.820400  |
| O  | -0.067125  | 5.632445  | 2.430295  |
| O  | -0.055135  | 5.627644  | -2.433938 |
| O  | 0.941494   | 2.815962  | -2.156912 |
| Ti | 1.381514   | 4.690818  | -1.809618 |
| O  | 1.245972   | 4.900259  | 0.002081  |
| O  | 0.936347   | 2.817445  | 2.157968  |
| Ti | 1.370466   | 4.693012  | 1.814296  |
| O  | 2.862653   | 5.597625  | 2.435913  |
| O  | 2.872710   | 5.604207  | -2.422381 |
| Ti | -2.549240  | -1.617815 | -1.723917 |
| O  | -2.610320  | -1.068227 | -0.005034 |
| Ti | -2.553349  | -1.616547 | 1.713282  |
| Ti | -4.340586  | -4.774540 | -1.674413 |
| O  | -3.337479  | -3.319667 | 1.399465  |
| O  | -4.662003  | -5.439421 | -0.007784 |
| Ti | -4.345798  | -4.774163 | 1.659578  |
| O  | -3.337019  | -3.318106 | -1.410576 |
| O  | -1.145343  | -0.347287 | -2.196104 |
| O  | -1.151177  | -0.345938 | 2.189275  |

80a

E = -80007.430822006179 Hartree

|   |          |          |           |
|---|----------|----------|-----------|
| O | 2.068456 | 1.994217 | 2.272098  |
| O | 2.074830 | 1.988278 | -2.270687 |
| O | 4.276799 | 4.916631 | 1.413449  |

|    |           |           |           |
|----|-----------|-----------|-----------|
| O  | 4.278076  | 4.915648  | -1.414072 |
| O  | 5.642918  | 7.000563  | 0.000823  |
| Ti | 5.327349  | 6.347186  | -1.672708 |
| Ti | 5.322684  | 6.349546  | 1.674535  |
| Ti | 3.470537  | 3.224676  | 1.721468  |
| O  | 3.493448  | 2.670027  | 0.002015  |
| Ti | 3.474306  | 3.220898  | -1.718693 |
| O  | 4.926305  | 2.488523  | -2.553792 |
| Ti | 6.354777  | 1.657798  | -1.799856 |
| O  | 6.275438  | 1.867479  | 0.010258  |
| O  | 4.918325  | 2.494059  | 2.565427  |
| Ti | 6.350595  | 1.661301  | 1.820383  |
| O  | 7.946054  | 0.525213  | 2.352741  |
| O  | 7.949922  | 0.521606  | -2.329240 |
| O  | 6.926439  | 5.768519  | 2.414712  |
| O  | 6.933738  | 5.763165  | -2.403757 |
| O  | 7.803920  | 2.960222  | -2.144712 |
| Ti | 8.366140  | 4.791162  | -1.804167 |
| O  | 8.258039  | 5.010800  | 0.008443  |
| O  | 7.799596  | 2.964041  | 2.165574  |
| Ti | 8.360397  | 4.794243  | 1.822404  |
| O  | 9.907600  | 5.646510  | 2.455605  |
| O  | 10.183034 | 3.351770  | 1.470911  |
| O  | 10.184961 | 3.351015  | -1.448747 |
| O  | 9.914461  | 5.645386  | -2.434209 |
| O  | 11.630250 | 5.397664  | 0.012157  |
| Ti | 11.318674 | 4.724839  | -1.655696 |
| O  | 12.892520 | 3.922414  | -2.281929 |
| Ti | 11.314748 | 4.726197  | 1.679967  |
| O  | 12.895239 | 3.933673  | 2.300214  |
| Ti | 13.634274 | 2.508036  | 1.388618  |
| Ti | 13.637313 | 2.505875  | -1.361687 |
| O  | 13.586522 | 0.808561  | 2.121369  |
| Ti | 12.139802 | -0.308413 | 1.817520  |
| O  | 11.987493 | -0.470298 | 0.013207  |
| O  | 13.590617 | 0.805609  | -2.092432 |
| Ti | 12.142017 | -0.310439 | -1.790996 |
| O  | 12.436214 | 2.329987  | 0.012357  |
| O  | 10.758496 | 0.709798  | 2.426411  |
| Ti | 9.374556  | 1.664933  | 1.731117  |
| O  | 14.851708 | 2.784937  | 0.014798  |
| O  | 9.297401  | 1.143231  | 0.011823  |
| O  | 10.762414 | 0.708348  | -2.402380 |
| Ti | 9.377520  | 1.663234  | -1.707939 |
| O  | 0.209738  | -1.218192 | 2.010644  |
| O  | 0.214757  | -1.222919 | -2.007247 |
| Ti | 1.513572  | 0.176545  | 1.790576  |
| O  | 1.781904  | 0.155038  | 0.002964  |
| Ti | 1.518196  | 0.171947  | -1.784920 |
| O  | -3.860171 | -7.196575 | 2.436248  |
| O  | -0.902119 | -7.227536 | -2.412140 |
| O  | -0.908999 | -7.223523 | 2.425036  |

|    |           |           |           |
|----|-----------|-----------|-----------|
| O  | -1.876319 | -4.427343 | 2.135501  |
| Ti | -2.359021 | -6.290713 | 1.810925  |
| O  | -2.231486 | -6.514561 | 0.003834  |
| O  | -1.871873 | -4.432382 | -2.130712 |
| Ti | -2.354148 | -6.294716 | -1.803649 |
| O  | -3.854126 | -7.199308 | -2.434320 |
| O  | 0.988993  | -3.863759 | 2.557470  |
| Ti | -0.457893 | -3.052768 | 1.813998  |
| O  | -0.360642 | -3.226180 | 0.003410  |
| O  | 0.995974  | -3.869999 | -2.542766 |
| Ti | -0.453831 | -3.057314 | -1.807341 |
| O  | 2.946557  | -0.676233 | -2.524496 |
| Ti | 4.376114  | -1.516418 | -1.779911 |
| O  | 4.119993  | -1.547142 | 0.010842  |
| O  | 2.938807  | -0.669881 | 2.538028  |
| Ti | 4.371651  | -1.512399 | 1.802213  |
| O  | 6.109291  | -2.559979 | 2.161837  |
| O  | 6.113385  | -2.563517 | -2.135159 |
| O  | 5.672004  | -0.147161 | -1.939113 |
| O  | 5.668091  | -0.143789 | 1.963673  |
| O  | 11.870911 | -2.051368 | 2.401343  |
| Ti | 10.441579 | -3.083703 | 1.838865  |
| O  | 10.499590 | -3.115427 | 0.014262  |
| O  | 11.875704 | -2.054836 | -2.373366 |
| Ti | 10.444493 | -3.085865 | -1.810149 |
| O  | 10.073660 | -4.812708 | 2.409384  |
| O  | 8.954697  | -2.151262 | 2.310790  |
| Ti | 7.443448  | -1.259369 | 1.806032  |
| O  | 7.598677  | -1.279342 | 0.013449  |
| O  | 8.958540  | -2.153527 | -2.283123 |
| Ti | 7.446399  | -1.261998 | -1.779179 |
| Ti | 2.469581  | -4.568870 | -1.713609 |
| O  | 2.410406  | -4.035764 | 0.010602  |
| Ti | 2.465860  | -4.564980 | 1.736123  |
| Ti | 0.712042  | -7.766643 | -1.673667 |
| O  | 1.723398  | -6.304725 | 1.456944  |
| O  | 2.188475  | -8.571074 | 2.482776  |
| O  | 0.411315  | -8.407404 | 0.010799  |
| Ti | 0.708259  | -7.763478 | 1.694725  |
| O  | 1.724657  | -6.306946 | -1.433705 |
| Ti | 6.829966  | -8.369496 | 1.381547  |
| O  | 7.116511  | -9.584460 | 0.018260  |
| Ti | 6.833330  | -8.372546 | -1.348184 |
| O  | 6.463726  | -7.207493 | 0.014854  |
| O  | 5.232220  | -8.413836 | -2.261881 |
| O  | 5.227756  | -8.407836 | 2.292951  |
| O  | 4.107148  | -5.757562 | 2.121324  |
| Ti | 3.633507  | -7.622304 | 1.805292  |
| O  | 3.623803  | -7.919335 | 0.014418  |
| O  | 4.111336  | -5.762387 | -2.093500 |
| Ti | 3.638501  | -7.626599 | -1.776811 |
| O  | 2.194050  | -8.572540 | -2.459159 |



|    |            |           |           |
|----|------------|-----------|-----------|
| O  | 3.839541   | -3.338133 | -2.262424 |
| O  | 3.834275   | -3.333009 | 2.286294  |
| Ti | 8.635739   | -5.802324 | 1.813867  |
| O  | 8.705802   | -5.532241 | 0.015627  |
| O  | 10.076797  | -4.815869 | -2.378047 |
| Ti | 8.638733   | -5.805161 | -1.782276 |
| O  | 8.359651   | -7.608148 | -2.062573 |
| O  | 8.355523   | -7.604584 | 2.096837  |
| O  | 7.036563   | -5.144658 | 2.423521  |
| Ti | 5.501288   | -4.385148 | 1.822424  |
| O  | 5.592054   | -4.400643 | 0.014162  |
| O  | 7.040273   | -5.148360 | -2.394405 |
| Ti | 5.504646   | -4.388942 | -1.794285 |
| Ti | -8.640032  | 5.802138  | -1.813523 |
| O  | -8.708481  | 5.521357  | -0.016665 |
| O  | -10.070102 | 4.810908  | 2.376252  |
| Ti | -8.641866  | 5.807730  | 1.779111  |
| O  | -8.369221  | 7.612523  | 2.055508  |
| O  | -8.366643  | 7.605559  | -2.096988 |
| O  | -7.034915  | 5.150523  | -2.424782 |
| Ti | -5.505496  | 4.384120  | -1.823780 |
| O  | -5.597909  | 4.392893  | -0.015513 |
| O  | -7.037203  | 5.157844  | 2.392740  |
| Ti | -5.507940  | 4.390033  | 1.792897  |
| O  | -3.842200  | 3.342243  | 2.259123  |
| O  | -3.837972  | 3.334203  | -2.284718 |
| Ti | -6.838380  | 8.369042  | -1.387297 |
| O  | -7.122831  | 9.585998  | -0.024940 |
| Ti | -6.841715  | 8.374814  | 1.343075  |
| O  | -6.473409  | 7.208491  | -0.019134 |
| O  | -5.240265  | 8.418000  | 2.256518  |
| O  | -5.235681  | 8.407912  | -2.298492 |
| O  | -4.111663  | 5.757362  | -2.121057 |
| Ti | -3.641218  | 7.623102  | -1.809869 |
| O  | -3.632029  | 7.918472  | -0.019362 |
| O  | -4.114996  | 5.765056  | 2.087351  |
| Ti | -3.646770  | 7.630136  | 1.771829  |
| O  | -2.202158  | 8.576374  | 2.450902  |
| O  | -1.725475  | 6.308805  | 1.426991  |
| O  | -1.724982  | 6.305059  | -1.457598 |
| O  | -2.195980  | 8.570500  | -2.486622 |
| O  | -0.420446  | 8.412551  | -0.016028 |
| Ti | -0.712986  | 7.765091  | -1.698913 |
| Ti | -0.717097  | 7.770597  | 1.668336  |
| Ti | -2.472547  | 4.572149  | 1.710386  |
| O  | -2.413842  | 4.035051  | -0.012324 |
| Ti | -2.469550  | 4.565817  | -1.737214 |
| O  | -10.069041 | 4.804757  | -2.407268 |
| O  | -0.987588  | 3.872757  | -2.560040 |
| Ti | 0.459950   | 3.064118  | -1.815185 |
| O  | 0.362010   | 3.236285  | -0.004145 |
| O  | -0.995065  | 3.880689  | 2.542477  |

|    |            |           |           |
|----|------------|-----------|-----------|
| Ti | 0.455342   | 3.069103  | 1.807117  |
| O  | 0.900256   | 7.235345  | 2.404115  |
| O  | 0.908034   | 7.226545  | -2.423635 |
| O  | 1.879632   | 4.437042  | -2.135183 |
| Ti | 2.364128   | 6.300133  | -1.812327 |
| O  | 2.239923   | 6.525134  | -0.005741 |
| O  | 1.874503   | 4.442978  | 2.128097  |
| Ti | 2.357014   | 6.305358  | 1.801506  |
| O  | 3.859655   | 7.202502  | 2.432458  |
| O  | 3.867925   | 7.199873  | -2.437524 |
| Ti | -10.445864 | 3.078241  | -1.838320 |
| O  | -10.500546 | 3.103623  | -0.013121 |
| O  | -11.867778 | 2.036421  | 2.372523  |
| Ti | -10.446694 | 3.082970  | 1.811948  |
| O  | -8.961517  | 2.148118  | -2.310660 |
| Ti | -7.446572  | 1.257944  | -1.806064 |
| O  | -7.598478  | 1.277823  | -0.012228 |
| O  | -8.962793  | 2.153534  | 2.285970  |
| Ti | -7.448301  | 1.262086  | 1.781610  |
| O  | -5.674133  | 0.147539  | 1.946036  |
| O  | -5.671460  | 0.142003  | -1.966970 |
| O  | -6.113079  | 2.556784  | -2.171277 |
| O  | -6.116122  | 2.562895  | 2.144408  |
| Ti | -4.379484  | 1.518561  | 1.782835  |
| O  | -4.126583  | 1.539656  | -0.010514 |
| Ti | -4.376086  | 1.512235  | -1.804164 |
| Ti | -13.626686 | -2.526093 | -1.383023 |
| Ti | -13.627528 | -2.522594 | 1.367360  |
| O  | -13.582738 | -0.828765 | -2.118495 |
| Ti | -12.142859 | 0.295430  | -1.816318 |
| O  | -11.989828 | 0.456233  | -0.010565 |
| O  | -13.582434 | -0.824531 | 2.101596  |
| Ti | -12.143041 | 0.299146  | 1.794900  |
| O  | -12.429099 | -2.343811 | -0.007272 |
| O  | -11.868029 | 2.032317  | -2.396485 |
| O  | -10.759610 | -0.717331 | -2.429557 |
| Ti | -9.375175  | -1.669491 | -1.729899 |
| O  | -14.842588 | -2.805867 | -0.007454 |
| O  | -9.305563  | -1.148936 | -0.009972 |
| O  | -10.761884 | -0.716329 | 2.409525  |
| Ti | -9.375795  | -1.666576 | 1.710482  |
| Ti | -11.304473 | -4.738807 | -1.676592 |
| O  | -12.893303 | -3.961729 | -2.287038 |
| O  | -10.176621 | -3.358261 | 1.453675  |
| O  | -9.897341  | -5.651615 | 2.442737  |
| O  | -11.615228 | -5.408201 | -0.005883 |
| Ti | -11.305458 | -4.735522 | 1.663069  |
| O  | -12.886883 | -3.947384 | 2.282830  |
| O  | -10.179358 | -3.358837 | -1.472012 |
| O  | -6.923768  | -5.778122 | -2.414816 |
| O  | -6.929561  | -5.774323 | 2.405010  |
| O  | -7.799459  | -2.957875 | 2.148195  |

|    |           |           |           |
|----|-----------|-----------|-----------|
| Ti | -8.355615 | -4.792368 | 1.808534  |
| O  | -8.248564 | -5.012737 | -0.005446 |
| O  | -7.798351 | -2.963352 | -2.162141 |
| Ti | -8.351478 | -4.798215 | -1.820190 |
| O  | -9.894098 | -5.655758 | -2.451987 |
| O  | -7.947240 | -0.524885 | -2.352204 |
| O  | -7.949644 | -0.519372 | 2.331704  |
| O  | -4.922021 | -2.484633 | 2.556121  |
| Ti | -6.351804 | -1.655858 | 1.802495  |
| O  | -6.273148 | -1.862796 | -0.008086 |
| O  | -4.917130 | -2.491516 | -2.565790 |
| Ti | -6.349796 | -1.660827 | -1.818920 |
| O  | -2.941542 | 0.672680  | -2.539213 |
| Ti | -1.512936 | -0.165610 | -1.789450 |
| O  | -1.778328 | -0.145524 | -0.002740 |
| O  | -2.948219 | 0.680930  | 2.526106  |
| Ti | -1.517542 | -0.161116 | 1.784574  |
| O  | -0.209999 | 1.227651  | -2.010579 |
| O  | -0.215210 | 1.232569  | 2.007313  |
| Ti | -3.469566 | -3.217747 | -1.722398 |
| O  | -3.501351 | -2.663442 | -0.002247 |
| Ti | -3.472656 | -3.214392 | 1.719040  |
| Ti | -5.314932 | -6.347634 | -1.675280 |
| O  | -4.270871 | -4.913109 | 1.415768  |
| O  | -5.633089 | -6.999592 | -0.001202 |
| Ti | -5.318658 | -6.344774 | 1.672561  |
| O  | -4.269144 | -4.914923 | -1.416583 |
| O  | -2.069529 | -1.983233 | -2.270456 |
| O  | -2.074899 | -1.977725 | 2.268836  |

**Table S6. Cartesian Coordinates for the Optimized Anatase-like and 48c-like 3-D (TiO<sub>2</sub>)<sub>n</sub> USNPs, n ≤ 480, at the PM6 Level.**

| anatase-like 3-D (0,0,0)-mer |           |           |           |
|------------------------------|-----------|-----------|-----------|
| Ti                           | 2.670018  | -4.372448 | 1.446496  |
| O                            | 2.731852  | -5.535948 | -0.047892 |
| Ti                           | 2.486814  | -4.140920 | -1.352425 |
| O                            | 2.364585  | -2.934193 | 0.084938  |
| O                            | 0.891574  | -4.100052 | -2.344771 |
| O                            | 0.836285  | -4.023270 | 2.113146  |
| O                            | -0.015397 | -1.158984 | 2.157112  |
| Ti                           | -0.753695 | -2.982434 | 1.689629  |
| O                            | -0.784666 | -3.061853 | -0.150874 |
| O                            | -0.013864 | -1.298575 | -2.608028 |
| Ti                           | -0.660384 | -3.078659 | -2.040049 |
| O                            | -2.209909 | -4.189012 | -2.457449 |
| O                            | -2.517710 | -1.638336 | -1.973275 |
| O                            | -2.552981 | -1.666738 | 1.804866  |

|    |           |           |           |
|----|-----------|-----------|-----------|
| O  | -2.168535 | -4.359658 | 2.189607  |
| O  | -4.022842 | -3.728026 | 0.107661  |
| Ti | -3.741989 | -3.128218 | 1.862788  |
| O  | -5.454773 | -2.218891 | 2.500167  |
| Ti | -3.567372 | -3.179086 | -1.649318 |
| O  | -5.277738 | -2.592229 | -2.257591 |
| Ti | -5.827083 | -1.022127 | -1.418587 |
| Ti | -5.991707 | -0.783308 | 1.379219  |
| O  | -5.833436 | 0.475664  | -2.530198 |
| Ti | -4.567924 | 1.875781  | -2.183499 |
| O  | -5.203611 | 2.207144  | -0.438713 |
| O  | -6.321496 | 0.968719  | 1.950527  |
| Ti | -4.919133 | 2.128070  | 1.398065  |
| O  | -4.602800 | -0.651845 | 0.036908  |
| O  | -4.003090 | 3.679191  | -2.481992 |
| O  | -3.007087 | 1.040851  | -2.758921 |
| Ti | -1.549246 | 0.110628  | -2.005572 |
| O  | -7.154555 | -1.230340 | -0.059280 |
| O  | -1.563453 | 0.232447  | -0.173583 |
| O  | -3.426106 | 1.171418  | 2.171010  |
| Ti | -1.726118 | 0.262220  | 1.714785  |
| O  | -4.493107 | 3.909541  | 1.891191  |
| O  | 3.984327  | -3.624172 | -2.358235 |
| Ti | 6.122085  | 1.162334  | 1.377153  |
| Ti | 5.822520  | 1.115024  | -1.412944 |
| O  | 6.152673  | -0.618705 | 1.967315  |
| Ti | 4.712393  | -1.867428 | 1.661793  |
| O  | 5.059759  | -2.047213 | -0.198981 |
| O  | 5.812109  | -0.469214 | -2.397972 |
| Ti | 4.539507  | -1.836105 | -1.961323 |
| O  | 4.639864  | 0.975968  | 0.071855  |
| O  | 4.345044  | -3.744430 | 1.999559  |
| O  | 3.107236  | -0.882073 | 2.140459  |
| Ti | 1.494184  | 0.175612  | 1.665171  |
| O  | 7.230898  | 1.400279  | -0.145726 |
| O  | 1.342142  | -0.353775 | -0.115898 |
| O  | 2.988528  | -0.971963 | -2.627263 |
| Ti | 1.495964  | -0.109009 | -1.942963 |
| Ti | 3.475057  | 3.593948  | 1.779844  |
| O  | 5.375938  | 2.810420  | 2.164303  |
| O  | 2.378475  | 1.665206  | -1.691425 |
| O  | 2.143417  | 4.131680  | -2.505568 |
| O  | 3.932765  | 3.984258  | -0.019993 |
| Ti | 3.536767  | 3.190643  | -1.649447 |
| O  | 5.182844  | 2.590473  | -2.375101 |
| O  | 2.370165  | 1.990380  | 1.897581  |
| Ti | -2.491318 | 4.140963  | -1.474325 |
| O  | -2.688910 | 5.477034  | -0.105270 |
| Ti | -2.727342 | 4.247553  | 1.329822  |
| O  | -2.452873 | 2.864173  | 0.011630  |
| O  | -1.212781 | 4.330491  | 2.482620  |
| O  | -0.947240 | 4.085028  | -2.462821 |

|    |           |           |           |
|----|-----------|-----------|-----------|
| O  | -0.029614 | 1.300232  | -2.565298 |
| Ti | 0.621183  | 3.087804  | -1.954825 |
| O  | 0.455722  | 3.275860  | -0.100932 |
| O  | -0.216671 | 1.516381  | 1.888463  |
| Ti | 0.495877  | 3.442090  | 1.793608  |
| O  | 1.940068  | 4.696542  | 1.883960  |
| Ti | 3.961817  | -5.004474 | 7.537021  |
| O  | 4.159587  | -6.340752 | 6.168161  |
| Ti | 4.197484  | -5.111694 | 4.732756  |
| O  | 3.922641  | -3.728108 | 6.050567  |
| O  | 2.683087  | -5.194272 | 3.579945  |
| O  | 2.417390  | -4.948804 | 8.524874  |
| O  | 1.499005  | -2.164585 | 8.627653  |
| Ti | 0.848631  | -3.952044 | 8.017223  |
| O  | 1.013885  | -4.139999 | 6.163306  |
| O  | 1.686170  | -2.380355 | 4.174016  |
| Ti | 0.973973  | -4.306394 | 4.268820  |
| O  | -0.470020 | -5.560523 | 4.178262  |
| O  | -0.898524 | -2.854144 | 4.165231  |
| O  | -0.908985 | -2.529043 | 7.753769  |
| O  | -0.673515 | -4.995607 | 8.568372  |
| O  | -2.462859 | -4.848829 | 6.082569  |
| Ti | -2.067031 | -4.055233 | 7.711934  |
| O  | -3.713551 | -3.454938 | 8.437298  |
| Ti | -2.005414 | -4.458125 | 4.282802  |
| O  | -3.906123 | -3.674433 | 3.898306  |
| Ti | -4.651959 | -2.026021 | 4.685171  |
| Ti | -4.352604 | -1.978823 | 7.475275  |
| O  | -4.682112 | -0.245200 | 4.094830  |
| Ti | -3.242187 | 1.004255  | 4.400812  |
| O  | -3.590452 | 1.183936  | 6.261446  |
| O  | -4.341954 | -0.395885 | 8.460435  |
| Ti | -3.069628 | 0.972323  | 8.023613  |
| O  | -3.169879 | -1.839991 | 5.991289  |
| O  | -2.874787 | 2.881268  | 4.062852  |
| O  | -1.637291 | 0.018486  | 3.922048  |
| Ti | -0.024960 | -1.039939 | 4.397123  |
| O  | -5.761020 | -2.263713 | 6.208966  |
| O  | 0.127632  | -0.509822 | 6.179057  |
| O  | -1.518638 | 0.108048  | 8.689620  |
| Ti | -0.026533 | -0.755240 | 8.005254  |
| O  | -2.514240 | 2.760304  | 8.420691  |
| O  | 5.963329  | -4.773337 | 4.170881  |
| Ti | 7.297275  | 0.158223  | 7.481599  |
| Ti | 7.461989  | -0.080805 | 4.683898  |
| O  | 7.303855  | -1.339252 | 8.592799  |
| Ti | 6.038168  | -2.739168 | 8.246404  |
| O  | 6.672682  | -3.070561 | 6.501214  |
| O  | 7.791705  | -1.832251 | 4.111953  |
| Ti | 6.389012  | -2.991577 | 4.664638  |
| O  | 6.072838  | -0.211247 | 6.026133  |
| O  | 5.473470  | -4.542708 | 8.544653  |

|    |           |           |          |
|----|-----------|-----------|----------|
| O  | 4.477010  | -1.904677 | 8.821567 |
| Ti | 3.018868  | -0.975070 | 8.068684 |
| O  | 8.624595  | 0.367337  | 6.122207 |
| O  | 3.033381  | -1.096650 | 6.234201 |
| O  | 4.896050  | -2.034822 | 3.891551 |
| Ti | 3.195502  | -1.126283 | 4.347602 |
| Ti | 5.036669  | 2.314736  | 7.711911 |
| O  | 6.747449  | 1.728444  | 8.321213 |
| O  | 4.024022  | 0.802769  | 4.257433 |
| O  | 3.638583  | 3.495653  | 3.872958 |
| O  | 5.492809  | 2.863843  | 5.954733 |
| Ti | 5.211619  | 2.264147  | 4.199851 |
| O  | 6.924371  | 1.355578  | 3.561582 |
| O  | 3.987579  | 0.774697  | 8.035716 |
| Ti | -1.199794 | 3.509131  | 4.616112 |
| O  | -1.261320 | 4.672325  | 6.110869 |
| Ti | -1.016735 | 3.276831  | 7.414917 |
| O  | -0.895127 | 2.070335  | 5.977304 |
| O  | 0.578612  | 3.235923  | 8.407392 |
| O  | 0.633910  | 3.159862  | 3.949384 |
| O  | 1.485309  | 0.294852  | 3.905313 |
| Ti | 2.223334  | 2.118283  | 4.372870 |
| O  | 2.254461  | 2.197353  | 6.213395 |
| O  | 1.483327  | 0.434042  | 8.670671 |
| Ti | 2.130306  | 2.214056  | 8.101502 |
| O  | 3.680061  | 3.324911  | 8.519697 |

anatase-like 3-D (0,0,1)-mer

|    |           |           |           |
|----|-----------|-----------|-----------|
| Ti | 2.621787  | -4.153254 | 1.400457  |
| O  | 2.725803  | -5.414259 | -0.021438 |
| Ti | 2.448942  | -4.109088 | -1.396687 |
| O  | 2.254018  | -2.822223 | -0.054351 |
| O  | 0.868640  | -4.179358 | -2.400613 |
| O  | 0.721208  | -3.935417 | 2.031602  |
| O  | -0.062823 | -1.072106 | 2.036817  |
| Ti | -0.906483 | -2.865658 | 1.651741  |
| O  | -0.868399 | -3.114597 | -0.172800 |
| O  | 0.071973  | -1.399399 | -2.599992 |
| Ti | -0.698970 | -3.177099 | -2.055494 |
| O  | -2.233526 | -4.313708 | -2.432599 |
| O  | -2.477683 | -1.738207 | -2.194044 |
| O  | -2.635635 | -1.476038 | 1.760273  |
| O  | -2.368968 | -4.198962 | 2.249287  |
| O  | -3.972267 | -3.582886 | 0.077907  |
| Ti | -3.890773 | -2.882155 | 1.872399  |
| O  | -5.731806 | -2.289890 | 2.039020  |
| Ti | -3.585178 | -3.221423 | -1.706594 |
| O  | -5.260336 | -2.711620 | -2.490479 |
| Ti | -5.948023 | -1.134360 | -1.800844 |
| Ti | -6.266238 | -0.904615 | 0.966948  |
| O  | -5.894019 | 0.403524  | -2.870738 |
| Ti | -4.579723 | 1.638593  | -2.234354 |

|    |           |           |           |
|----|-----------|-----------|-----------|
| O  | -5.210110 | 1.946845  | -0.470523 |
| O  | -6.506933 | 0.727167  | 1.819864  |
| Ti | -5.078735 | 1.923978  | 1.385096  |
| O  | -4.804820 | -0.663615 | -0.318710 |
| O  | -3.920064 | 3.437621  | -2.230190 |
| O  | -2.985113 | 0.894540  | -2.833257 |
| Ti | -1.489015 | -0.014444 | -2.105146 |
| O  | -7.359924 | -1.321209 | -0.549349 |
| O  | -1.540425 | 0.124794  | -0.294838 |
| O  | -3.594784 | 1.075590  | 2.293906  |
| Ti | -1.773748 | 0.479855  | 1.581307  |
| O  | -4.720262 | 3.681986  | 1.883723  |
| O  | 3.997762  | -3.608093 | -2.360317 |
| Ti | 6.318173  | 1.305786  | 1.387186  |
| Ti | 5.902522  | 1.033780  | -1.385992 |
| O  | 6.429785  | -0.526885 | 2.158014  |
| Ti | 4.851297  | -1.591869 | 1.590041  |
| O  | 5.228348  | -1.989842 | -0.224700 |
| O  | 5.908863  | -0.495985 | -2.422602 |
| Ti | 4.590363  | -1.850906 | -1.966297 |
| O  | 4.850910  | 0.718949  | 0.217593  |
| O  | 4.297640  | -3.439293 | 1.826150  |
| O  | 3.234972  | -0.647182 | 2.089128  |
| Ti | 1.464167  | 0.290810  | 1.659601  |
| O  | 7.335146  | 1.508865  | -0.185371 |
| O  | 1.433382  | -0.398823 | -0.076768 |
| O  | 3.082553  | -0.921910 | -2.625545 |
| Ti | 1.531796  | -0.187913 | -1.902470 |
| Ti | 3.593827  | 3.652762  | 1.906718  |
| O  | 5.455848  | 2.853635  | 2.184739  |
| O  | 2.426964  | 1.623659  | -1.569839 |
| O  | 2.192517  | 4.082712  | -2.486172 |
| O  | 4.003380  | 3.916756  | 0.051942  |
| Ti | 3.561693  | 3.157223  | -1.573246 |
| O  | 5.193613  | 2.504139  | -2.282726 |
| O  | 2.421276  | 2.087653  | 1.973330  |
| Ti | -2.442742 | 3.751183  | -1.146400 |
| O  | -2.738263 | 5.080574  | 0.175355  |
| Ti | -2.806391 | 3.937325  | 1.685285  |
| O  | -2.352643 | 2.463458  | 0.422850  |
| O  | -1.038626 | 4.512409  | 2.494646  |
| O  | -0.984494 | 3.828057  | -2.269311 |
| O  | 0.057002  | 1.218483  | -2.551877 |
| Ti | 0.704845  | 3.005327  | -1.899124 |
| O  | 0.594789  | 3.347199  | -0.062649 |
| O  | -0.154996 | 1.642592  | 1.780232  |
| Ti | 0.625913  | 3.596642  | 1.820250  |
| O  | 2.094790  | 4.812583  | 1.992622  |
| Ti | 3.991910  | -5.450524 | 7.642814  |
| O  | 3.910260  | -6.463195 | 6.069484  |
| Ti | 4.088924  | -5.028391 | 4.796445  |
| O  | 4.322806  | -3.867741 | 6.384645  |

|    |           |           |          |
|----|-----------|-----------|----------|
| O  | 2.667766  | -4.938682 | 3.535446 |
| O  | 2.254737  | -4.883633 | 8.178467 |
| O  | 1.454901  | -2.068740 | 8.242369 |
| Ti | 0.561225  | -3.850223 | 7.764452 |
| O  | 1.055580  | -4.134794 | 5.987578 |
| O  | 1.696101  | -2.318878 | 4.037549 |
| Ti | 0.827849  | -4.212509 | 4.126212 |
| O  | -0.660167 | -5.463530 | 4.176686 |
| O  | -0.985556 | -2.778815 | 4.092479 |
| O  | -1.095308 | -2.578543 | 7.921944 |
| O  | -0.886339 | -5.196691 | 8.150254 |
| O  | -2.787362 | -4.620397 | 6.088047 |
| Ti | -2.508744 | -3.907299 | 7.810802 |
| O  | -4.273767 | -3.343443 | 8.794188 |
| Ti | -2.157027 | -4.349320 | 4.287311 |
| O  | -4.039520 | -3.329306 | 3.977803 |
| Ti | -4.391985 | -1.921084 | 5.213566 |
| Ti | -4.584734 | -1.563068 | 8.035612 |
| O  | -4.151500 | -0.347918 | 4.414629 |
| Ti | -3.026337 | 1.310947  | 4.395328 |
| O  | -4.006059 | 1.662947  | 6.023211 |
| O  | -4.825637 | 0.309139  | 8.430057 |
| Ti | -3.532691 | 1.473041  | 7.778744 |
| O  | -3.135963 | -1.950926 | 6.743637 |
| O  | -2.813404 | 3.215573  | 3.702362 |
| O  | -1.465463 | 0.310970  | 3.767210 |
| Ti | -0.023545 | -0.972375 | 4.255122 |
| O  | -5.753633 | -1.848352 | 6.579617 |
| O  | -0.182930 | -0.896803 | 6.065684 |
| O  | -1.920496 | 0.434081  | 8.221812 |
| Ti | -0.288572 | -0.612282 | 7.934872 |
| O  | -2.806793 | 3.228173  | 8.134269 |
| O  | 5.750662  | -4.953737 | 3.989562 |
| Ti | 7.332647  | 0.195089  | 6.912210 |
| Ti | 7.525800  | -0.164454 | 4.091268 |
| O  | 7.090814  | -1.377725 | 7.711658 |
| Ti | 5.966540  | -3.036340 | 7.730426 |
| O  | 6.946769  | -3.387191 | 6.102571 |
| O  | 7.768923  | -2.036765 | 3.695486 |
| Ti | 6.475522  | -3.199275 | 4.346638 |
| O  | 6.075843  | 0.223847  | 5.382532 |
| O  | 5.755609  | -4.940200 | 8.423310 |
| O  | 4.404886  | -2.038028 | 8.358893 |
| Ti | 2.962856  | -0.755593 | 7.868806 |
| O  | 8.694980  | 0.121604  | 5.547118 |
| O  | 3.123010  | -0.832240 | 6.058518 |
| O  | 4.861888  | -2.161458 | 3.901688 |
| Ti | 3.228355  | -1.116739 | 4.189500 |
| Ti | 5.096230  | 2.620773  | 7.837402 |
| O  | 6.978243  | 1.602839  | 8.147720 |
| O  | 4.036694  | 0.849754  | 4.203097 |
| O  | 3.826590  | 3.468423  | 3.975566 |



|    |           |           |           |
|----|-----------|-----------|-----------|
| O  | 5.727657  | 2.893371  | 6.036971  |
| Ti | 5.448825  | 2.179540  | 4.314462  |
| O  | 7.214229  | 1.614979  | 3.331510  |
| O  | 3.926013  | 1.050116  | 8.032082  |
| Ti | -1.047577 | 3.724588  | 4.481289  |
| O  | -0.965336 | 4.738377  | 6.054003  |
| Ti | -1.145543 | 3.303774  | 7.327094  |
| O  | -1.381143 | 2.142671  | 5.739872  |
| O  | 0.274138  | 3.213700  | 8.590051  |
| O  | 0.687638  | 3.154649  | 3.945819  |
| O  | 1.484673  | 0.339515  | 3.881181  |
| Ti | 2.379680  | 2.120223  | 4.360976  |
| O  | 1.884037  | 2.404079  | 6.137632  |
| O  | 1.244506  | 0.590462  | 8.086763  |
| Ti | 2.112029  | 2.483645  | 7.998962  |
| O  | 3.599356  | 3.735224  | 7.947703  |
| Ti | 5.382989  | -5.478843 | 13.271082 |
| O  | 5.680921  | -6.808140 | 11.950043 |
| Ti | 5.747746  | -5.664903 | 10.439661 |
| O  | 5.291775  | -4.191495 | 11.702187 |
| O  | 3.982093  | -6.240748 | 9.628851  |
| O  | 3.925354  | -5.556336 | 14.394194 |
| O  | 2.881103  | -2.947119 | 14.676670 |
| Ti | 2.237263  | -4.733951 | 14.024020 |
| O  | 2.346135  | -5.077526 | 12.187337 |
| O  | 3.094170  | -3.370975 | 10.344440 |
| Ti | 2.316232  | -5.325780 | 10.304239 |
| O  | 0.847208  | -6.541755 | 10.132123 |
| O  | 0.521777  | -3.817120 | 10.151490 |
| O  | 0.512432  | -3.353427 | 13.692956 |
| O  | 0.748676  | -5.810948 | 14.612049 |
| O  | -1.062221 | -5.645736 | 12.073498 |
| Ti | -0.621114 | -4.886208 | 13.698531 |
| O  | -2.251134 | -4.233222 | 14.409921 |
| Ti | -0.652205 | -5.382634 | 10.218591 |
| O  | -2.514082 | -4.582927 | 9.941118  |
| Ti | -3.377802 | -3.036461 | 10.738140 |
| Ti | -2.960581 | -2.762993 | 13.511489 |
| O  | -3.491273 | -1.202288 | 9.967032  |
| Ti | -1.912824 | -0.137249 | 10.535726 |
| O  | -2.291966 | 0.263929  | 12.349575 |
| O  | -2.972028 | -1.231989 | 14.544905 |
| Ti | -1.653705 | 0.125125  | 14.090956 |
| O  | -1.909995 | -2.447441 | 11.906477 |
| O  | -1.357975 | 1.710280  | 10.297231 |
| O  | -0.296362 | -1.081859 | 10.035945 |
| Ti | 1.475246  | -2.019278 | 10.463782 |
| O  | -4.392698 | -3.241803 | 12.310966 |
| O  | 1.507037  | -1.328677 | 12.200681 |
| O  | -0.146086 | -0.806263 | 14.746283 |
| Ti | 1.406119  | -1.540002 | 14.024978 |
| O  | -1.060278 | 1.881457  | 14.486794 |

|    |           |           |           |
|----|-----------|-----------|-----------|
| O  | 7.662012  | -5.409004 | 10.240480 |
| Ti | 8.886421  | -0.592617 | 13.925011 |
| Ti | 9.205390  | -0.821767 | 11.157174 |
| O  | 8.833074  | -2.130572 | 14.994666 |
| Ti | 7.518755  | -3.366233 | 14.359782 |
| O  | 8.148963  | -3.673358 | 12.595576 |
| O  | 9.447628  | -2.454276 | 10.305099 |
| Ti | 8.019274  | -3.650569 | 10.740275 |
| O  | 7.743766  | -1.062897 | 12.442597 |
| O  | 6.860410  | -5.165416 | 14.355096 |
| O  | 5.923972  | -2.622507 | 14.958656 |
| Ti | 4.427413  | -1.714008 | 14.230847 |
| O  | 10.298445 | -0.404467 | 12.673707 |
| O  | 4.478772  | -1.853062 | 12.420080 |
| O  | 6.534907  | -2.801912 | 9.833156  |
| Ti | 4.713176  | -2.207201 | 10.544445 |
| Ti | 6.523156  | 1.493968  | 13.833197 |
| O  | 8.197864  | 0.983736  | 14.616386 |
| O  | 5.575555  | -0.250472 | 10.366100 |
| O  | 5.307390  | 2.471899  | 9.876257  |
| O  | 6.910652  | 1.856951  | 12.048873 |
| Ti | 6.829721  | 1.156359  | 10.254393 |
| O  | 8.670634  | 0.564073  | 10.086325 |
| O  | 5.415766  | 0.010652  | 14.319489 |
| Ti | 0.316392  | 2.425451  | 10.723850 |
| O  | 0.212722  | 3.686161  | 12.146658 |
| Ti | 0.488660  | 2.381274  | 13.521873 |
| O  | 0.682820  | 1.094184  | 12.180165 |
| O  | 2.069429  | 2.451616  | 14.525519 |
| O  | 2.217321  | 2.205410  | 10.093619 |
| O  | 3.002700  | -0.656154 | 10.087557 |
| Ti | 3.845785  | 1.137064  | 10.473931 |
| O  | 3.806803  | 1.386652  | 12.298444 |
| O  | 2.865245  | -0.329256 | 14.725035 |
| Ti | 3.636499  | 1.448360  | 14.181145 |
| O  | 5.170502  | 2.585297  | 14.560001 |

anatase-like 3-D (0,0,2)-mer

|    |           |           |           |
|----|-----------|-----------|-----------|
| Ti | 2.561144  | -4.270602 | 1.344444  |
| O  | 2.685614  | -5.470547 | -0.114024 |
| Ti | 2.431974  | -4.113441 | -1.461468 |
| O  | 2.275940  | -2.876092 | -0.052979 |
| O  | 0.843938  | -4.173903 | -2.445109 |
| O  | 0.690483  | -3.934239 | 1.960206  |
| O  | -0.088924 | -1.061280 | 1.966640  |
| Ti | -0.933896 | -2.852836 | 1.592436  |
| O  | -0.886790 | -3.094460 | -0.237366 |
| O  | 0.034564  | -1.406254 | -2.690722 |
| Ti | -0.728663 | -3.167676 | -2.116956 |
| O  | -2.263385 | -4.306250 | -2.489337 |
| O  | -2.506387 | -1.727439 | -2.247176 |
| O  | -2.667183 | -1.466773 | 1.688033  |

|    |           |           |           |
|----|-----------|-----------|-----------|
| O  | -2.393364 | -4.188373 | 2.182157  |
| O  | -4.011788 | -3.579359 | 0.010136  |
| Ti | -3.915742 | -2.884558 | 1.805039  |
| O  | -5.748446 | -2.262815 | 1.975664  |
| Ti | -3.614582 | -3.210888 | -1.772238 |
| O  | -5.279274 | -2.693093 | -2.574993 |
| Ti | -5.965835 | -1.117360 | -1.876666 |
| Ti | -6.277349 | -0.884419 | 0.892324  |
| O  | -5.914142 | 0.419372  | -2.944250 |
| Ti | -4.599878 | 1.657321  | -2.304941 |
| O  | -5.235464 | 1.963898  | -0.544984 |
| O  | -6.531103 | 0.747818  | 1.744239  |
| Ti | -5.102546 | 1.942300  | 1.312830  |
| O  | -4.819115 | -0.649239 | -0.395745 |
| O  | -3.927968 | 3.447287  | -2.314083 |
| O  | -3.011040 | 0.898061  | -2.902317 |
| Ti | -1.510811 | -0.005316 | -2.180525 |
| O  | -7.376958 | -1.301989 | -0.622264 |
| O  | -1.552017 | 0.151147  | -0.369119 |
| O  | -3.626552 | 1.094395  | 2.238753  |
| Ti | -1.808203 | 0.480968  | 1.508982  |
| O  | -4.749945 | 3.705118  | 1.802471  |
| O  | 3.953148  | -3.599900 | -2.444607 |
| Ti | 6.137779  | 1.262373  | 1.314845  |
| Ti | 5.911185  | 1.155062  | -1.501287 |
| O  | 6.148637  | -0.543047 | 1.778256  |
| Ti | 4.702334  | -1.776415 | 1.549911  |
| O  | 5.024698  | -2.005115 | -0.302402 |
| O  | 5.836455  | -0.444070 | -2.444484 |
| Ti | 4.528492  | -1.812653 | -2.075852 |
| O  | 4.659878  | 1.200529  | -0.047964 |
| O  | 4.229079  | -3.610986 | 1.938476  |
| O  | 3.153856  | -0.722476 | 2.038249  |
| Ti | 1.442020  | 0.279149  | 1.547109  |
| O  | 7.281623  | 1.447561  | -0.203436 |
| O  | 1.431039  | -0.428743 | -0.186454 |
| O  | 3.019777  | -0.954586 | -2.799782 |
| Ti | 1.506786  | -0.195365 | -2.015695 |
| Ti | 3.584815  | 3.624024  | 1.774158  |
| O  | 5.494532  | 2.890964  | 2.205008  |
| O  | 2.415717  | 1.576742  | -1.670608 |
| O  | 2.251197  | 4.019652  | -2.537072 |
| O  | 4.027895  | 3.997129  | -0.029153 |
| Ti | 3.623849  | 3.081103  | -1.607128 |
| O  | 5.247759  | 2.599184  | -2.485048 |
| O  | 2.439200  | 2.048778  | 1.893149  |
| Ti | -2.444128 | 3.743966  | -1.227200 |
| O  | -2.740747 | 5.083532  | 0.090294  |
| Ti | -2.832712 | 3.952594  | 1.603002  |
| O  | -2.388343 | 2.463847  | 0.359802  |
| O  | -1.056391 | 4.520620  | 2.399050  |
| O  | -0.979912 | 3.815832  | -2.326168 |

|    |           |           |           |
|----|-----------|-----------|-----------|
| O  | 0.033162  | 1.211488  | -2.655709 |
| Ti | 0.736410  | 2.983558  | -1.992496 |
| O  | 0.592363  | 3.307365  | -0.155134 |
| O  | -0.164932 | 1.629776  | 1.693879  |
| Ti | 0.594722  | 3.576322  | 1.723412  |
| O  | 2.070957  | 4.769645  | 1.876822  |
| Ti | 4.105554  | -5.020290 | 7.426568  |
| O  | 4.233418  | -6.306286 | 6.005681  |
| Ti | 4.117941  | -5.046046 | 4.590108  |
| O  | 3.845096  | -3.711721 | 5.866445  |
| O  | 2.564008  | -5.153772 | 3.426041  |
| O  | 2.280601  | -4.877905 | 8.115792  |
| O  | 1.508456  | -2.047857 | 8.151688  |
| Ti | 0.572089  | -3.854529 | 7.744534  |
| O  | 0.843561  | -4.128741 | 5.942783  |
| O  | 1.677905  | -2.345841 | 3.976993  |
| Ti | 0.860001  | -4.255519 | 4.051277  |
| O  | -0.676913 | -5.470092 | 4.070907  |
| O  | -1.016012 | -2.753350 | 4.000961  |
| O  | -1.081743 | -2.548009 | 7.899094  |
| O  | -0.912982 | -5.161144 | 8.235876  |
| O  | -2.744479 | -4.598169 | 6.048730  |
| Ti | -2.490362 | -3.877404 | 7.774578  |
| O  | -4.278177 | -3.353903 | 8.723649  |
| Ti | -2.149408 | -4.341092 | 4.227521  |
| O  | -4.067131 | -3.355061 | 3.904887  |
| Ti | -4.397254 | -1.930948 | 5.118319  |
| Ti | -4.629213 | -1.577722 | 7.920531  |
| O  | -4.144316 | -0.346259 | 4.344221  |
| Ti | -3.030651 | 1.326638  | 4.319647  |
| O  | -3.990127 | 1.673790  | 5.949494  |
| O  | -4.894492 | 0.298354  | 8.277378  |
| Ti | -3.547460 | 1.450167  | 7.711110  |
| O  | -3.154492 | -1.957332 | 6.662926  |
| O  | -2.845325 | 3.244178  | 3.622610  |
| O  | -1.461710 | 0.347920  | 3.689369  |
| Ti | -0.042617 | -0.975698 | 4.184054  |
| O  | -5.781926 | -1.898650 | 6.464389  |
| O  | -0.222503 | -0.830005 | 5.993187  |
| O  | -1.975154 | 0.380319  | 8.199864  |
| Ti | -0.276915 | -0.590448 | 7.869192  |
| O  | -2.822384 | 3.206462  | 8.083779  |
| O  | 5.858488  | -4.757610 | 3.888312  |
| Ti | 7.872094  | 0.386517  | 7.510361  |
| Ti | 7.497966  | -0.122280 | 4.719207  |
| O  | 8.018150  | -1.411640 | 8.349886  |
| Ti | 6.400006  | -2.419841 | 7.745973  |
| O  | 7.040917  | -3.192321 | 6.097060  |
| O  | 7.844234  | -1.740390 | 3.889884  |
| Ti | 6.487195  | -3.042735 | 4.364178  |
| O  | 6.472682  | -0.513098 | 6.353774  |
| O  | 5.679614  | -4.254262 | 7.970893  |

|    |           |           |           |
|----|-----------|-----------|-----------|
| O  | 4.705814  | -1.540466 | 8.196078  |
| Ti | 2.944398  | -0.653994 | 7.802986  |
| O  | 8.819227  | 0.624737  | 5.908625  |
| O  | 2.987818  | -0.709389 | 5.992728  |
| O  | 4.970102  | -1.926804 | 3.822490  |
| Ti | 3.198287  | -1.120846 | 4.155922  |
| Ti | 5.052118  | 2.712657  | 7.879086  |
| O  | 6.898516  | 1.872077  | 8.176111  |
| O  | 4.057451  | 0.869113  | 4.289395  |
| O  | 3.706278  | 3.535519  | 3.879756  |
| O  | 5.622763  | 2.832838  | 6.007993  |
| Ti | 5.268875  | 2.319682  | 4.268545  |
| O  | 6.848685  | 1.248984  | 3.598634  |
| O  | 3.837778  | 1.180656  | 8.086630  |
| Ti | -1.091463 | 3.773015  | 4.393639  |
| O  | -1.037707 | 4.810644  | 5.951646  |
| Ti | -1.181573 | 3.380596  | 7.248374  |
| O  | -1.388803 | 2.205110  | 5.669147  |
| O  | 0.237652  | 3.321865  | 8.493793  |
| O  | 0.638556  | 3.151096  | 3.857070  |
| O  | 1.486658  | 0.336967  | 3.789830  |
| Ti | 2.296601  | 2.122660  | 4.307270  |
| O  | 1.902819  | 2.464740  | 6.084015  |
| O  | 1.202740  | 0.662977  | 8.021086  |
| Ti | 2.054670  | 2.587310  | 7.970998  |
| O  | 3.553999  | 3.840882  | 7.950126  |
| Ti | 5.501915  | -6.364536 | 13.793650 |
| O  | 5.449105  | -7.401919 | 12.235502 |
| Ti | 5.592466  | -5.971797 | 10.938747 |
| O  | 5.798876  | -4.796593 | 12.518284 |
| O  | 4.173223  | -5.912172 | 9.693593  |
| O  | 3.771526  | -5.743971 | 14.330164 |
| O  | 2.923815  | -2.929284 | 14.397646 |
| Ti | 2.113414  | -4.715393 | 13.880446 |
| O  | 2.507031  | -5.056149 | 12.103354 |
| O  | 3.207253  | -3.253865 | 10.166081 |
| Ti | 2.355484  | -5.178187 | 10.216529 |
| O  | 0.856392  | -6.431934 | 10.236567 |
| O  | 0.571440  | -3.771935 | 10.100861 |
| O  | 0.352165  | -3.460878 | 13.898122 |
| O  | 0.703621  | -6.127934 | 14.307516 |
| O  | -1.212475 | -5.425392 | 12.179282 |
| Ti | -0.858949 | -4.912212 | 13.918790 |
| O  | -2.440079 | -3.842780 | 14.588520 |
| Ti | -0.642231 | -5.304366 | 10.308225 |
| O  | -2.488427 | -4.464471 | 10.011987 |
| Ti | -3.460895 | -2.976790 | 10.678338 |
| Ti | -3.088706 | -2.469790 | 13.469096 |
| O  | -3.605998 | -1.179260 | 9.838018  |
| Ti | -1.988993 | -0.168176 | 10.440085 |
| O  | -2.631037 | 0.600593  | 12.089445 |
| O  | -3.434383 | -0.851527 | 14.299549 |

|    |           |           |           |
|----|-----------|-----------|-----------|
| Ti | -2.076606 | 0.450761  | 13.822302 |
| O  | -2.062087 | -2.078540 | 11.835234 |
| O  | -1.269753 | 1.666381  | 10.215518 |
| O  | -0.295740 | -1.049206 | 9.991115  |
| Ti | 1.465228  | -1.936914 | 10.384664 |
| O  | -4.409280 | -3.215013 | 12.278512 |
| O  | 1.422084  | -1.882840 | 12.194752 |
| O  | -0.559166 | -0.664855 | 14.365205 |
| Ti | 1.211798  | -1.472135 | 14.031916 |
| O  | -1.447984 | 2.164827  | 14.298301 |
| O  | 7.232514  | -5.796379 | 10.102155 |
| Ti | 8.808124  | -0.660124 | 13.070558 |
| Ti | 9.040621  | -1.012756 | 10.268193 |
| O  | 8.555339  | -2.245711 | 13.843501 |
| Ti | 7.441024  | -3.918134 | 13.867767 |
| O  | 8.398531  | -4.264446 | 12.236607 |
| O  | 9.306475  | -2.888663 | 9.911206  |
| Ti | 7.957486  | -4.040029 | 10.475025 |
| O  | 7.565586  | -0.633514 | 11.525434 |
| O  | 7.255695  | -5.835520 | 14.564857 |
| O  | 5.871781  | -2.939541 | 14.498021 |
| Ti | 4.452402  | -1.616684 | 14.002674 |
| O  | 10.192996 | -0.691354 | 11.724678 |
| O  | 4.632655  | -1.761968 | 12.193605 |
| O  | 6.386070  | -2.969694 | 9.986228  |
| Ti | 4.686900  | -2.000424 | 10.317300 |
| Ti | 6.559279  | 1.749941  | 13.961171 |
| O  | 8.477353  | 0.763391  | 14.284359 |
| O  | 5.492561  | -0.043604 | 10.289567 |
| O  | 5.323837  | 2.569281  | 9.951531  |
| O  | 7.154886  | 2.006713  | 12.140151 |
| Ti | 6.900733  | 1.285904  | 10.414179 |
| O  | 8.689305  | 0.763342  | 9.464994  |
| O  | 5.425851  | 0.161431  | 14.187067 |
| Ti | 0.305072  | 2.430710  | 10.760920 |
| O  | 0.177483  | 3.715579  | 12.182921 |
| Ti | 0.291952  | 2.453725  | 13.597321 |
| O  | 0.564586  | 1.120638  | 12.319272 |
| O  | 1.846288  | 2.561375  | 14.762315 |
| O  | 2.130129  | 2.287992  | 10.071661 |
| O  | 2.899941  | -0.543240 | 10.035768 |
| Ti | 3.838201  | 1.263228  | 10.442573 |
| O  | 3.566896  | 1.537658  | 12.244621 |
| O  | 2.732456  | -0.246381 | 14.209737 |
| Ti | 3.549973  | 1.663043  | 14.135851 |
| O  | 5.087188  | 2.878264  | 14.117466 |
| Ti | 6.854679  | -6.335960 | 19.414900 |
| O  | 7.151993  | -7.675296 | 18.097580 |
| Ti | 7.243287  | -6.544449 | 16.584532 |
| O  | 6.798373  | -5.055860 | 17.827978 |
| O  | 5.466861  | -7.112056 | 15.788619 |
| O  | 5.389638  | -6.407828 | 20.512304 |

|    |           |           |           |
|----|-----------|-----------|-----------|
| O  | 4.375412  | -3.804307 | 20.843521 |
| Ti | 3.672744  | -5.576200 | 20.179995 |
| O  | 3.816484  | -5.900014 | 18.342804 |
| O  | 4.575285  | -4.222148 | 16.493637 |
| Ti | 3.815287  | -6.168736 | 16.464016 |
| O  | 2.338890  | -7.361786 | 16.310303 |
| O  | 1.970736  | -4.640881 | 16.293897 |
| O  | 1.993019  | -4.169094 | 19.857440 |
| O  | 2.158135  | -6.611712 | 20.725315 |
| O  | 0.381686  | -6.589458 | 18.216577 |
| Ti | 0.784591  | -5.673442 | 19.794761 |
| O  | -0.839140 | -5.191407 | 20.670601 |
| Ti | 0.824922  | -6.215905 | 16.413478 |
| O  | -1.084420 | -5.482562 | 15.982259 |
| Ti | -1.728293 | -3.853948 | 16.871558 |
| Ti | -1.502060 | -3.747381 | 19.687573 |
| O  | -1.738589 | -2.048692 | 16.407656 |
| Ti | -0.292260 | -0.814720 | 16.637514 |
| O  | -0.616487 | -0.585719 | 18.489466 |
| O  | -1.427355 | -2.147705 | 20.631261 |
| Ti | -0.119673 | -0.779222 | 20.262798 |
| O  | -0.250857 | -3.791713 | 18.234462 |
| O  | 0.181302  | 1.019767  | 16.249042 |
| O  | 1.256064  | -1.869336 | 16.149597 |
| Ti | 2.967364  | -2.871541 | 16.640785 |
| O  | -2.872659 | -4.038956 | 18.389452 |
| O  | 2.978467  | -2.163194 | 18.372384 |
| O  | 1.388695  | -1.637620 | 20.986683 |
| Ti | 2.901427  | -2.397415 | 20.202970 |
| O  | 0.456185  | 1.007867  | 20.632121 |
| O  | 9.159677  | -6.294593 | 16.386481 |
| Ti | 10.374701 | -1.473595 | 20.067157 |
| Ti | 10.687166 | -1.706541 | 17.298009 |
| O  | 10.322743 | -3.011488 | 21.133972 |
| Ti | 9.008475  | -4.249001 | 20.494276 |
| O  | 9.642840  | -4.553257 | 18.733823 |
| O  | 10.941014 | -3.337519 | 16.445991 |
| Ti | 9.511235  | -4.534467 | 16.875382 |
| O  | 9.228301  | -1.940703 | 18.585180 |
| O  | 8.338282  | -6.039240 | 20.503093 |
| O  | 7.419232  | -3.490499 | 21.091034 |
| Ti | 5.919004  | -2.587720 | 20.368008 |
| O  | 11.786329 | -1.289024 | 18.812883 |
| O  | 5.961429  | -2.743718 | 18.557863 |
| O  | 8.036402  | -3.685838 | 15.948423 |
| Ti | 6.217711  | -3.073269 | 16.678559 |
| Ti | 8.023892  | 0.618141  | 19.961213 |
| O  | 9.687522  | 0.100927  | 20.765010 |
| O  | 7.078394  | -1.124919 | 16.499818 |
| O  | 6.803254  | 1.596212  | 16.006356 |
| O  | 8.421015  | 0.986847  | 18.178491 |
| Ti | 8.324890  | 0.292431  | 16.384113 |

|    |           |           |           |
|----|-----------|-----------|-----------|
| O  | 10.158107 | -0.328580 | 16.213541 |
| O  | 6.915293  | -0.865473 | 20.435189 |
| Ti | 1.849085  | 1.678999  | 16.843489 |
| O  | 1.725135  | 2.878770  | 18.302171 |
| Ti | 1.977522  | 1.521083  | 19.649347 |
| O  | 2.133179  | 0.284272  | 18.240469 |
| O  | 3.565506  | 1.581335  | 20.633400 |
| O  | 3.719515  | 1.342685  | 16.227505 |
| O  | 4.502128  | -1.530426 | 16.220663 |
| Ti | 5.343183  | 0.260251  | 16.595430 |
| O  | 5.295453  | 0.501356  | 18.425362 |
| O  | 4.373948  | -1.186566 | 20.878544 |
| Ti | 5.137403  | 0.574540  | 20.304195 |
| O  | 6.672027  | 1.713517  | 20.677559 |

anatase-like 3-D (0,0,3)-mer

|    |           |           |           |
|----|-----------|-----------|-----------|
| Ti | 2.719673  | -4.309514 | 1.357297  |
| O  | 2.808720  | -5.467599 | -0.148113 |
| Ti | 2.512470  | -4.071618 | -1.442638 |
| O  | 2.350909  | -2.889475 | 0.007062  |
| O  | 0.899953  | -4.125239 | -2.401634 |
| O  | 0.853776  | -4.092709 | 2.019188  |
| O  | 0.032630  | -1.146575 | 2.085767  |
| Ti | -0.748891 | -2.968287 | 1.696855  |
| O  | -0.803820 | -3.166327 | -0.146640 |
| O  | 0.036444  | -1.359518 | -2.547388 |
| Ti | -0.670995 | -3.145098 | -2.018543 |
| O  | -2.230654 | -4.276539 | -2.403029 |
| O  | -2.504299 | -1.718265 | -1.975709 |
| O  | -2.514349 | -1.585437 | 1.863955  |
| O  | -2.194109 | -4.305772 | 2.224469  |
| O  | -4.019644 | -3.710555 | 0.202888  |
| Ti | -3.717751 | -3.017604 | 1.931986  |
| O  | -5.544415 | -2.287620 | 2.722544  |
| Ti | -3.553103 | -3.238761 | -1.575548 |
| O  | -5.298921 | -2.703690 | -2.190738 |
| Ti | -5.915427 | -1.205843 | -1.293409 |
| Ti | -6.151412 | -0.993214 | 1.502519  |
| O  | -5.878623 | 0.346839  | -2.312263 |
| Ti | -4.522021 | 1.648749  | -1.891750 |
| O  | -5.123965 | 1.853586  | -0.100107 |
| O  | -6.435004 | 0.681785  | 2.231670  |
| Ti | -5.005663 | 1.880123  | 1.751292  |
| O  | -4.706928 | -0.943401 | 0.219893  |
| O  | -3.846087 | 3.419113  | -1.844668 |
| O  | -3.020693 | 0.871692  | -2.647244 |
| Ti | -1.471635 | 0.015245  | -1.946317 |
| O  | -7.291182 | -1.398371 | 0.027613  |
| O  | -1.530751 | 0.123903  | -0.142649 |
| O  | -3.502024 | 0.979335  | 2.526492  |
| Ti | -1.681881 | 0.403386  | 1.764235  |
| O  | -4.619522 | 3.623232  | 2.249567  |



|    |           |           |           |
|----|-----------|-----------|-----------|
| O  | 3.991817  | -3.494747 | -2.455215 |
| Ti | 6.361305  | 1.234708  | 1.423686  |
| Ti | 6.036650  | 1.205428  | -1.417625 |
| O  | 6.254629  | -0.584480 | 1.824250  |
| Ti | 4.807014  | -1.806840 | 1.535794  |
| O  | 5.110318  | -1.924997 | -0.330893 |
| O  | 5.880463  | -0.343685 | -2.443709 |
| Ti | 4.568921  | -1.706976 | -2.083499 |
| O  | 4.796694  | 1.288557  | 0.049283  |
| O  | 4.427810  | -3.671352 | 1.813941  |
| O  | 3.267461  | -0.773076 | 2.058451  |
| Ti | 1.545288  | 0.264268  | 1.698783  |
| O  | 7.439948  | 1.408039  | -0.155975 |
| O  | 1.441985  | -0.530599 | -0.013614 |
| O  | 3.025508  | -0.838919 | -2.704061 |
| Ti | 1.532919  | -0.157737 | -1.807719 |
| Ti | 3.733158  | 3.602951  | 2.135926  |
| O  | 5.607502  | 2.746053  | 2.425864  |
| O  | 2.459092  | 1.558712  | -1.289870 |
| O  | 2.364900  | 4.004042  | -2.097424 |
| O  | 4.165108  | 4.026818  | 0.341077  |
| Ti | 3.759818  | 3.029344  | -1.189678 |
| O  | 5.317908  | 2.692611  | -2.273166 |
| O  | 2.548776  | 2.021637  | 2.140576  |
| Ti | -2.326021 | 3.731174  | -0.783072 |
| O  | -2.620527 | 5.035818  | 0.569981  |
| Ti | -2.689963 | 3.862278  | 2.057821  |
| O  | -2.250778 | 2.411692  | 0.741665  |
| O  | -0.945149 | 4.394454  | 2.900870  |
| O  | -0.900679 | 3.807047  | -1.915326 |
| O  | 0.068574  | 1.262661  | -2.331739 |
| Ti | 0.849834  | 3.001078  | -1.567295 |
| O  | 0.679112  | 3.354307  | 0.261629  |
| O  | -0.049308 | 1.565088  | 1.940470  |
| Ti | 0.722320  | 3.539084  | 2.160338  |
| O  | 2.197843  | 4.724698  | 2.344091  |
| Ti | 4.026264  | -5.493005 | 7.659705  |
| O  | 4.069368  | -6.519778 | 6.080803  |
| Ti | 4.253027  | -5.095582 | 4.793177  |
| O  | 4.398286  | -3.920599 | 6.369679  |
| O  | 2.819727  | -5.068187 | 3.543993  |
| O  | 2.252858  | -4.967364 | 8.120512  |
| O  | 1.497999  | -2.102523 | 8.167439  |
| Ti | 0.529445  | -3.884029 | 7.750807  |
| O  | 1.093649  | -4.230863 | 5.993570  |
| O  | 1.844016  | -2.473569 | 4.017644  |
| Ti | 0.964286  | -4.376138 | 4.132921  |
| O  | -0.501383 | -5.634854 | 4.156186  |
| O  | -0.832611 | -2.938647 | 4.074603  |
| O  | -1.141361 | -2.555362 | 7.886476  |
| O  | -0.898959 | -5.188389 | 8.200315  |
| O  | -2.611833 | -4.795700 | 6.125852  |

|    |           |           |          |
|----|-----------|-----------|----------|
| Ti | -2.514934 | -3.898567 | 7.812657 |
| O  | -4.390891 | -3.259002 | 8.897119 |
| Ti | -2.019906 | -4.524517 | 4.339712 |
| O  | -3.906698 | -3.745817 | 3.943107 |
| Ti | -4.684278 | -2.180056 | 4.812609 |
| Ti | -4.896111 | -1.935088 | 7.668534 |
| O  | -4.013914 | -0.565075 | 4.464923 |
| Ti | -2.905414 | 1.111455  | 4.625348 |
| O  | -4.132374 | 1.343060  | 6.105598 |
| O  | -4.917364 | -0.222104 | 8.391307 |
| Ti | -3.686125 | 1.137856  | 7.856286 |
| O  | -3.418835 | -2.366085 | 6.531092 |
| O  | -2.710421 | 3.043703  | 4.034952 |
| O  | -1.327104 | 0.192668  | 3.914211 |
| Ti | 0.119006  | -1.141327 | 4.278201 |
| O  | -6.041907 | -2.179937 | 6.187028 |
| O  | -0.057412 | -1.064585 | 6.083040 |
| O  | -1.960310 | 0.293495  | 8.302896 |
| Ti | -0.229637 | -0.640964 | 7.927864 |
| O  | -3.125507 | 2.893046  | 8.268567 |
| O  | 5.934279  | -4.894838 | 4.016522 |
| Ti | 7.796295  | 0.183697  | 7.437239 |
| Ti | 7.877143  | -0.029087 | 4.563720 |
| O  | 7.213429  | -1.485501 | 7.830676 |
| Ti | 6.007291  | -3.072367 | 7.691649 |
| O  | 7.062646  | -3.389764 | 6.111771 |
| O  | 7.894064  | -1.789205 | 3.914299 |
| Ti | 6.611093  | -3.113090 | 4.359494 |
| O  | 6.462266  | 0.425593  | 5.767355 |
| O  | 5.736134  | -4.919383 | 8.480453 |
| O  | 4.514744  | -1.919976 | 8.193593 |
| Ti | 2.939894  | -0.654524 | 7.813155 |
| O  | 9.086813  | 0.176064  | 5.988321 |
| O  | 3.234222  | -0.965358 | 6.038333 |
| O  | 5.023216  | -2.159949 | 3.819913 |
| Ti | 3.320195  | -1.213125 | 4.173943 |
| Ti | 5.230655  | 2.642649  | 7.941870 |
| O  | 7.054723  | 1.766227  | 8.344917 |
| O  | 4.247973  | 0.686443  | 4.313473 |
| O  | 3.962619  | 3.340683  | 4.173930 |
| O  | 5.806397  | 2.928436  | 6.150720 |
| Ti | 5.614922  | 2.035585  | 4.482421 |
| O  | 7.382088  | 1.363792  | 3.385071 |
| O  | 3.976722  | 1.081796  | 8.152626 |
| Ti | -0.950478 | 3.484116  | 4.886656 |
| O  | -1.006108 | 4.401215  | 6.492996 |
| Ti | -1.263951 | 2.932049  | 7.783329 |
| O  | -1.364036 | 1.850298  | 6.077297 |
| O  | 0.479132  | 3.419746  | 8.690929 |
| O  | 0.757656  | 2.932888  | 4.229728 |
| O  | 1.624657  | 0.206944  | 3.920016 |
| Ti | 2.550804  | 1.963852  | 4.480781 |

|    |           |           |           |
|----|-----------|-----------|-----------|
| O  | 2.137909  | 2.245847  | 6.250615  |
| O  | 1.240938  | 0.646049  | 8.011022  |
| Ti | 2.198896  | 2.592444  | 8.110979  |
| O  | 3.702065  | 3.772397  | 8.140502  |
| Ti | 5.419410  | -6.096212 | 13.503568 |
| O  | 5.494949  | -7.084011 | 11.932695 |
| Ti | 5.738768  | -5.671136 | 10.585768 |
| O  | 5.867271  | -4.516337 | 12.240021 |
| O  | 4.000886  | -6.211936 | 9.685884  |
| O  | 3.678666  | -5.548723 | 14.070057 |
| O  | 2.871127  | -2.784361 | 14.238669 |
| Ti | 1.872783  | -4.550372 | 13.807700 |
| O  | 2.304662  | -5.006424 | 12.058053 |
| O  | 3.269082  | -3.441445 | 10.218241 |
| Ti | 2.252020  | -5.364813 | 10.220775 |
| O  | 0.742370  | -6.542261 | 10.179345 |
| O  | 0.527308  | -3.838275 | 10.063829 |
| O  | 0.203539  | -3.242085 | 13.932326 |
| O  | 0.459446  | -5.898546 | 14.214427 |
| O  | -1.295067 | -5.532667 | 12.145308 |
| Ti | -1.153836 | -4.600417 | 13.818929 |
| O  | -2.967294 | -3.900854 | 14.916160 |
| Ti | -0.751533 | -5.366744 | 10.331603 |
| O  | -2.572413 | -4.534984 | 9.886942  |
| Ti | -3.358780 | -2.949334 | 10.769435 |
| Ti | -3.495023 | -2.628383 | 13.639806 |
| O  | -2.715486 | -1.321573 | 10.339337 |
| Ti | -1.521310 | 0.276946  | 10.566440 |
| O  | -2.757091 | 0.591072  | 12.012516 |
| O  | -3.506205 | -0.897764 | 14.337314 |
| Ti | -2.279512 | 0.439472  | 13.769750 |
| O  | -2.051742 | -3.100295 | 12.480196 |
| O  | -1.241378 | 2.126968  | 9.851581  |
| O  | -0.014235 | -0.847264 | 10.029387 |
| Ti | 1.569195  | -2.109285 | 10.361110 |
| O  | -4.673501 | -2.896465 | 12.199062 |
| O  | 1.343894  | -1.833823 | 12.143870 |
| O  | -0.577277 | -0.403990 | 14.295358 |
| Ti | 1.165178  | -1.327584 | 13.960018 |
| O  | -1.719850 | 2.203503  | 14.146723 |
| O  | 7.600860  | -5.658555 | 10.102894 |
| Ti | 9.239994  | -0.506045 | 13.480748 |
| Ti | 9.376682  | -0.826783 | 10.610019 |
| O  | 8.597269  | -2.134194 | 13.910360 |
| Ti | 7.403005  | -3.732510 | 13.683662 |
| O  | 8.637233  | -4.046004 | 12.236329 |
| O  | 9.388367  | -2.557355 | 9.911691  |
| Ti | 8.160657  | -3.894436 | 10.478936 |
| O  | 7.932963  | -0.355347 | 11.769492 |
| O  | 7.122484  | -5.582702 | 14.398398 |
| O  | 5.896193  | -2.608079 | 14.221214 |
| Ti | 4.311565  | -1.347741 | 13.888940 |

|    |           |           |           |
|----|-----------|-----------|-----------|
| O  | 10.554782 | -0.558114 | 12.051072 |
| O  | 4.537504  | -1.623890 | 12.106158 |
| O  | 6.458593  | -3.051459 | 9.953079  |
| Ti | 4.715590  | -2.128951 | 10.289837 |
| Ti | 6.631990  | 1.910354  | 13.918290 |
| O  | 8.453263  | 1.078844  | 14.363023 |
| O  | 5.677224  | -0.214016 | 10.317168 |
| O  | 5.421276  | 2.441984  | 10.035163 |
| O  | 7.175393  | 2.076137  | 12.104342 |
| Ti | 7.034357  | 1.143898  | 10.430903 |
| O  | 8.848085  | 0.445116  | 9.333349  |
| O  | 5.353559  | 0.381458  | 14.185776 |
| Ti | 0.461816  | 2.640910  | 10.746551 |
| O  | 0.386369  | 3.628614  | 12.317553 |
| Ti | 0.142214  | 2.215592  | 13.664126 |
| O  | 0.013447  | 1.060636  | 12.010003 |
| O  | 1.880461  | 2.756570  | 14.563937 |
| O  | 2.202076  | 2.092878  | 10.180297 |
| O  | 3.010009  | -0.672433 | 10.011315 |
| Ti | 4.007930  | 1.093795  | 10.441707 |
| O  | 3.575816  | 1.548998  | 12.191527 |
| O  | 2.612215  | -0.015350 | 14.031576 |
| Ti | 3.628604  | 1.908057  | 14.028634 |
| O  | 5.138214  | 3.085670  | 14.070081 |
| Ti | 6.829850  | -6.938875 | 19.363804 |
| O  | 6.885875  | -7.856170 | 17.757661 |
| Ti | 7.144752  | -6.387384 | 16.466902 |
| O  | 7.244225  | -5.305437 | 18.173136 |
| O  | 5.401672  | -6.875338 | 15.559324 |
| O  | 5.121633  | -6.388124 | 20.020261 |
| O  | 4.253067  | -3.663013 | 20.330579 |
| Ti | 3.328586  | -5.419496 | 19.769399 |
| O  | 3.740715  | -5.701165 | 17.999486 |
| O  | 4.639685  | -4.102574 | 16.239391 |
| Ti | 3.681491  | -6.048910 | 16.138893 |
| O  | 2.178748  | -7.229072 | 16.108946 |
| O  | 1.904659  | -4.538396 | 16.097081 |
| O  | 1.631146  | -4.142690 | 19.936649 |
| O  | 1.916655  | -6.795946 | 20.076449 |
| O  | 0.073839  | -6.384587 | 18.098833 |
| Ti | 0.264526  | -5.491011 | 19.767119 |
| O  | -1.502916 | -4.819140 | 20.865574 |
| Ti | 0.649812  | -6.099259 | 16.307511 |
| O  | -1.174005 | -5.222517 | 15.904597 |
| Ti | -1.915363 | -3.639499 | 16.812187 |
| Ti | -1.997511 | -3.426451 | 19.685384 |
| O  | -1.332354 | -1.970349 | 16.418841 |
| Ti | -0.126633 | -0.383110 | 16.557430 |
| O  | -1.183198 | -0.064506 | 18.136290 |
| O  | -2.013986 | -1.666513 | 20.337300 |
| Ti | -0.730388 | -0.339893 | 19.888285 |
| O  | -0.582262 | -3.881918 | 18.482220 |

|    |           |           |           |
|----|-----------|-----------|-----------|
| O  | 0.145315  | 1.463627  | 15.768572 |
| O  | 1.365566  | -1.536747 | 16.056029 |
| Ti | 2.940552  | -2.802310 | 16.437014 |
| O  | -3.206462 | -3.630741 | 18.262097 |
| O  | 2.646778  | -2.489818 | 18.211513 |
| O  | 0.856641  | -1.294571 | 20.428968 |
| Ti | 2.558973  | -2.242558 | 20.075853 |
| O  | -0.053158 | 1.439831  | 20.231476 |
| O  | 9.006338  | -6.348910 | 15.982316 |
| Ti | 10.564399 | -1.276068 | 19.438522 |
| Ti | 10.776365 | -1.521411 | 16.582577 |
| O  | 9.894599  | -2.891400 | 19.786514 |
| Ti | 8.785304  | -4.567011 | 19.626058 |
| O  | 10.012282 | -4.798696 | 18.145733 |
| O  | 10.798447 | -3.234487 | 15.860521 |
| Ti | 9.567180  | -4.594007 | 16.394841 |
| O  | 9.299023  | -1.090960 | 17.719646 |
| O  | 8.590130  | -6.499668 | 20.215890 |
| O  | 7.206042  | -3.649362 | 20.336512 |
| Ti | 5.760536  | -2.314550 | 19.972327 |
| O  | 11.922092 | -1.276062 | 18.064032 |
| O  | 5.938442  | -2.391268 | 18.167547 |
| O  | 7.841433  | -3.749829 | 15.947319 |
| Ti | 6.110447  | -2.815652 | 16.322975 |
| Ti | 7.900162  | 1.067974  | 19.910298 |
| O  | 9.786753  | 0.289282  | 20.307919 |
| O  | 7.022358  | -0.901370 | 16.363519 |
| O  | 6.779721  | 1.731689  | 16.049393 |
| O  | 8.493071  | 1.339140  | 18.123975 |
| Ti | 8.395830  | 0.442337  | 16.437452 |
| O  | 10.271468 | -0.197058 | 15.354001 |
| O  | 6.712204  | -0.517786 | 20.175695 |
| Ti | 1.855184  | 2.037469  | 16.589487 |
| O  | 1.812571  | 3.063779  | 18.168647 |
| Ti | 1.627753  | 1.639329  | 19.455788 |
| O  | 1.482226  | 0.464623  | 17.879238 |
| O  | 3.061446  | 1.612902  | 20.705568 |
| O  | 3.628228  | 1.510688  | 16.128863 |
| O  | 4.382467  | -1.354583 | 16.082346 |
| Ti | 5.351776  | 0.426920  | 16.498435 |
| O  | 4.786576  | 0.773708  | 18.255576 |
| O  | 4.035822  | -0.982601 | 20.232406 |
| Ti | 4.916051  | 0.919495  | 20.116140 |
| O  | 6.381899  | 2.178291  | 20.092386 |
| Ti | 8.205532  | -7.186041 | 25.034381 |
| O  | 8.499675  | -8.490753 | 23.681508 |
| Ti | 8.569012  | -7.317723 | 22.193334 |
| O  | 8.129403  | -5.866933 | 23.509199 |
| O  | 6.824168  | -7.848776 | 21.350393 |
| O  | 6.779033  | -7.261652 | 26.164838 |
| O  | 5.808795  | -4.717698 | 26.582900 |
| Ti | 5.028068  | -6.455914 | 25.818188 |

|    |           |           |           |
|----|-----------|-----------|-----------|
| O  | 5.198375  | -6.808508 | 23.989267 |
| O  | 5.928158  | -5.020136 | 22.310174 |
| Ti | 5.156471  | -6.993669 | 22.090371 |
| O  | 3.680922  | -8.179249 | 21.906456 |
| O  | 3.328197  | -5.476165 | 22.109801 |
| O  | 3.418346  | -5.012841 | 25.540715 |
| O  | 3.512981  | -7.458590 | 26.348247 |
| O  | 1.712972  | -7.481907 | 23.908949 |
| Ti | 2.116794  | -6.484266 | 25.440082 |
| O  | 0.559244  | -6.146912 | 26.522027 |
| Ti | 2.145302  | -7.057807 | 22.114498 |
| O  | 0.271115  | -6.200717 | 21.823903 |
| Ti | -0.481740 | -4.689082 | 22.826148 |
| Ti | -0.158298 | -4.660454 | 25.667629 |
| O  | -0.373796 | -2.870190 | 22.425460 |
| Ti | 1.072991  | -1.646017 | 22.713720 |
| O  | 0.767732  | -1.527576 | 24.580244 |
| O  | -0.002027 | -3.109581 | 26.693237 |
| Ti | 1.309162  | -1.746498 | 26.332628 |
| O  | 1.082141  | -4.743357 | 24.201066 |
| O  | 1.452949  | 0.218015  | 22.434722 |
| O  | 2.612173  | -2.680623 | 22.191851 |
| Ti | 4.333294  | -3.719267 | 22.552211 |
| O  | -1.561419 | -4.861457 | 24.405067 |
| O  | 4.436645  | -2.924357 | 24.264154 |
| O  | 2.852531  | -2.614407 | 26.953951 |
| Ti | 4.344629  | -3.297313 | 26.058158 |
| O  | 1.886552  | 0.041012  | 26.704644 |
| O  | 10.498629 | -7.078768 | 22.001832 |
| Ti | 11.793624 | -2.248926 | 25.545901 |
| Ti | 12.030820 | -2.462614 | 22.750097 |
| O  | 11.756523 | -3.802090 | 26.564810 |
| Ti | 10.399880 | -5.103595 | 26.144581 |
| O  | 11.000061 | -5.307697 | 24.352451 |
| O  | 12.314182 | -4.136866 | 22.021698 |
| Ti | 10.884537 | -5.334561 | 22.500953 |
| O  | 10.585526 | -2.510552 | 24.031915 |
| O  | 9.724958  | -6.874342 | 26.096918 |
| O  | 8.898082  | -4.327111 | 26.899411 |
| Ti | 7.349358  | -3.470599 | 26.197543 |
| O  | 13.170072 | -2.056914 | 24.225383 |
| O  | 7.408967  | -3.579978 | 24.393423 |
| O  | 9.381195  | -4.434461 | 21.724646 |
| Ti | 7.560649  | -3.858718 | 22.486725 |
| Ti | 9.431464  | -0.216889 | 25.826655 |
| O  | 11.176495 | -0.751780 | 26.443074 |
| O  | 8.393903  | -1.870615 | 22.387098 |
| O  | 8.074013  | 0.849799  | 22.025828 |
| O  | 9.898438  | 0.255118  | 24.048376 |
| Ti | 9.597416  | -0.438221 | 22.319303 |
| O  | 11.424006 | -1.168136 | 21.529010 |
| O  | 8.381835  | -1.737494 | 26.226319 |

|    |          |           |           |
|----|----------|-----------|-----------|
| Ti | 3.161287 | 0.855265  | 22.892846 |
| O  | 3.072442 | 2.013394  | 24.398486 |
| Ti | 3.366778 | 0.617088  | 25.692920 |
| O  | 3.527840 | -0.565179 | 24.243060 |
| O  | 4.978885 | 0.670106  | 26.652504 |
| O  | 5.026704 | 0.638285  | 22.230621 |
| O  | 5.846431 | -2.309072 | 22.164967 |
| Ti | 6.628530 | -0.487321 | 22.553626 |
| O  | 6.682355 | -0.289618 | 24.397203 |
| O  | 5.841232 | -2.095987 | 26.798361 |
| Ti | 6.549000 | -0.310852 | 26.269341 |
| O  | 8.108367 | 0.820905  | 26.653732 |

anatase-like 3-D (0,0,4)-mer

|    |           |           |           |
|----|-----------|-----------|-----------|
| Ti | 2.724855  | -4.298861 | 1.375090  |
| O  | 2.822382  | -5.450473 | -0.136730 |
| Ti | 2.532079  | -4.050116 | -1.425372 |
| O  | 2.371374  | -2.872091 | 0.027474  |
| O  | 0.916099  | -4.096741 | -2.379071 |
| O  | 0.863892  | -4.086050 | 2.043051  |
| O  | 0.038463  | -1.146202 | 2.150526  |
| Ti | -0.745425 | -2.961897 | 1.740291  |
| O  | -0.790730 | -3.157299 | -0.106113 |
| O  | 0.045383  | -1.329796 | -2.486612 |
| Ti | -0.653997 | -3.121858 | -1.976244 |
| O  | -2.213018 | -4.243286 | -2.380187 |
| O  | -2.498421 | -1.693189 | -1.902856 |
| O  | -2.507556 | -1.575820 | 1.922053  |
| O  | -2.191815 | -4.292815 | 2.256017  |
| O  | -4.000592 | -3.718893 | 0.243959  |
| Ti | -3.722842 | -2.999717 | 1.970921  |
| O  | -5.555174 | -2.300514 | 2.796630  |
| Ti | -3.536828 | -3.226264 | -1.526774 |
| O  | -5.289771 | -2.687212 | -2.126155 |
| Ti | -5.893075 | -1.198368 | -1.206973 |
| Ti | -6.161538 | -0.995223 | 1.589675  |
| O  | -5.843400 | 0.366846  | -2.204447 |
| Ti | -4.486907 | 1.676572  | -1.795360 |
| O  | -5.086783 | 1.845678  | 0.002557  |
| O  | -6.440722 | 0.681285  | 2.314106  |
| Ti | -5.003449 | 1.877508  | 1.854372  |
| O  | -4.695700 | -0.985537 | 0.329632  |
| O  | -3.820384 | 3.446530  | -1.726863 |
| O  | -2.999241 | 0.906375  | -2.576600 |
| Ti | -1.460701 | 0.036003  | -1.865560 |
| O  | -7.285475 | -1.382184 | 0.098856  |
| O  | -1.541904 | 0.141238  | -0.062834 |
| O  | -3.506713 | 0.970175  | 2.623071  |
| Ti | -1.682075 | 0.407931  | 1.850006  |
| O  | -4.614703 | 3.620602  | 2.358977  |
| O  | 4.007189  | -3.465263 | -2.439769 |
| Ti | 6.387249  | 1.231916  | 1.497267  |

|    |           |           |           |
|----|-----------|-----------|-----------|
| Ti | 6.057612  | 1.224842  | -1.346088 |
| O  | 6.277214  | -0.591463 | 1.868290  |
| Ti | 4.816913  | -1.799102 | 1.570297  |
| O  | 5.130074  | -1.917341 | -0.294739 |
| O  | 5.898098  | -0.315467 | -2.385921 |
| Ti | 4.581268  | -1.679484 | -2.043080 |
| O  | 4.819456  | 1.296887  | 0.124177  |
| O  | 4.431424  | -3.662851 | 1.844571  |
| O  | 3.279209  | -0.768139 | 2.104797  |
| Ti | 1.548918  | 0.265983  | 1.776373  |
| O  | 7.461941  | 1.422633  | -0.085766 |
| O  | 1.431382  | -0.528576 | 0.062128  |
| O  | 3.034462  | -0.801873 | -2.637317 |
| Ti | 1.541029  | -0.136403 | -1.726117 |
| Ti | 3.737944  | 3.592384  | 2.244282  |
| O  | 5.614450  | 2.727048  | 2.512070  |
| O  | 2.471804  | 1.566573  | -1.184735 |
| O  | 2.380960  | 4.015770  | -1.984214 |
| O  | 4.176596  | 4.025802  | 0.452756  |
| Ti | 3.778070  | 3.035094  | -1.084078 |
| O  | 5.329767  | 2.715267  | -2.183313 |
| O  | 2.554145  | 2.011784  | 2.236403  |
| Ti | -2.299922 | 3.749243  | -0.660895 |
| O  | -2.599356 | 5.041808  | 0.699201  |
| Ti | -2.683970 | 3.856588  | 2.180981  |
| O  | -2.235476 | 2.418014  | 0.852230  |
| O  | -0.939657 | 4.383829  | 3.031276  |
| O  | -0.880455 | 3.831439  | -1.798906 |
| O  | 0.079550  | 1.288635  | -2.234767 |
| Ti | 0.865742  | 3.017309  | -1.452419 |
| O  | 0.688505  | 3.360098  | 0.376265  |
| O  | -0.047510 | 1.565050  | 2.035989  |
| Ti | 0.724539  | 3.533847  | 2.280702  |
| O  | 2.202919  | 4.714476  | 2.468706  |
| Ti | 4.059813  | -5.505089 | 7.668271  |
| O  | 4.104112  | -6.525073 | 6.084599  |
| Ti | 4.277851  | -5.096209 | 4.802720  |
| O  | 4.430033  | -3.928137 | 6.385284  |
| O  | 2.840494  | -5.072863 | 3.560113  |
| O  | 2.280883  | -4.995061 | 8.135260  |
| O  | 1.524183  | -2.137516 | 8.202444  |
| Ti | 0.556151  | -3.913516 | 7.773802  |
| O  | 1.112929  | -4.261819 | 6.014439  |
| O  | 1.864029  | -2.494164 | 4.055912  |
| Ti | 0.980588  | -4.395135 | 4.153003  |
| O  | -0.488498 | -5.651515 | 4.165081  |
| O  | -0.817182 | -2.958433 | 4.116981  |
| O  | -1.121162 | -2.594475 | 7.938649  |
| O  | -0.869142 | -5.228072 | 8.218126  |
| O  | -2.590729 | -4.827319 | 6.149138  |
| Ti | -2.489296 | -3.944594 | 7.845880  |
| O  | -4.364913 | -3.317389 | 8.943627  |



|    |           |           |          |
|----|-----------|-----------|----------|
| Ti | -2.007375 | -4.541961 | 4.363829 |
| O  | -3.896867 | -3.759130 | 3.974746 |
| Ti | -4.674474 | -2.210801 | 4.874311 |
| Ti | -4.874030 | -1.984132 | 7.731238 |
| O  | -4.019193 | -0.586777 | 4.544084 |
| Ti | -2.901308 | 1.082356  | 4.722824 |
| O  | -4.132953 | 1.311415  | 6.201201 |
| O  | -4.891641 | -0.278286 | 8.472695 |
| Ti | -3.675306 | 1.097505  | 7.947887 |
| O  | -3.401445 | -2.405865 | 6.583997 |
| O  | -2.704503 | 3.018993  | 4.146298 |
| O  | -1.329485 | 0.161910  | 3.998095 |
| Ti | 0.131279  | -1.161764 | 4.341727 |
| O  | -6.027536 | -2.221047 | 6.255559 |
| O  | -0.034400 | -1.107617 | 6.147017 |
| O  | -1.930885 | 0.275694  | 8.378876 |
| Ti | -0.212059 | -0.675183 | 7.990952 |
| O  | -3.116508 | 2.846362  | 8.383427 |
| O  | 5.957498  | -4.888773 | 4.025886 |
| Ti | 7.833317  | 0.162421  | 7.486990 |
| Ti | 7.915893  | -0.039739 | 4.614059 |
| O  | 7.250262  | -1.510358 | 7.864346 |
| Ti | 6.046109  | -3.096367 | 7.711766 |
| O  | 7.099500  | -3.406416 | 6.128253 |
| O  | 7.936997  | -1.793722 | 3.948549 |
| Ti | 6.639539  | -3.111629 | 4.380611 |
| O  | 6.496751  | 0.404860  | 5.817828 |
| O  | 5.764747  | -4.943714 | 8.497840 |
| O  | 4.547306  | -1.951921 | 8.216012 |
| Ti | 2.964324  | -0.678164 | 7.860572 |
| O  | 9.125429  | 0.165547  | 6.037364 |
| O  | 3.251321  | -0.997063 | 6.085102 |
| O  | 5.052044  | -2.152600 | 3.844934 |
| Ti | 3.336240  | -1.234731 | 4.218731 |
| Ti | 5.244827  | 2.608491  | 8.018514 |
| O  | 7.077791  | 1.737972  | 8.399297 |
| O  | 4.265803  | 0.665804  | 4.386250 |
| O  | 3.978297  | 3.318093  | 4.273108 |
| O  | 5.826687  | 2.905751  | 6.230883 |
| Ti | 5.635405  | 2.011017  | 4.562283 |
| O  | 7.412210  | 1.356214  | 3.443948 |
| O  | 3.998642  | 1.045751  | 8.219650 |
| Ti | -0.941974 | 3.441585  | 5.007880 |
| O  | -0.991165 | 4.341899  | 6.620712 |
| Ti | -1.249680 | 2.864642  | 7.907992 |
| O  | -1.363186 | 1.799042  | 6.177790 |
| O  | 0.498515  | 3.366232  | 8.807120 |
| O  | 0.763533  | 2.896192  | 4.336860 |
| O  | 1.638806  | 0.186410  | 3.997624 |
| Ti | 2.568232  | 1.935992  | 4.578881 |
| O  | 2.164674  | 2.223116  | 6.347878 |
| O  | 1.257092  | 0.611230  | 8.076451 |

|    |           |           |           |
|----|-----------|-----------|-----------|
| Ti | 2.216511  | 2.559806  | 8.214496  |
| O  | 3.719086  | 3.740294  | 8.237698  |
| Ti | 5.452303  | -6.171613 | 13.527843 |
| O  | 5.526807  | -7.151950 | 11.948157 |
| Ti | 5.766615  | -5.737132 | 10.603627 |
| O  | 5.901550  | -4.594995 | 12.265944 |
| O  | 4.035932  | -6.257527 | 9.681694  |
| O  | 3.705076  | -5.652779 | 14.104700 |
| O  | 2.916520  | -2.879147 | 14.232366 |
| Ti | 1.904451  | -4.648209 | 13.823552 |
| O  | 2.351811  | -5.100493 | 12.074744 |
| O  | 3.303405  | -3.495368 | 10.233028 |
| Ti | 2.287318  | -5.414736 | 10.233504 |
| O  | 0.777361  | -6.595679 | 10.185340 |
| O  | 0.558380  | -3.893261 | 10.091124 |
| O  | 0.234667  | -3.339610 | 13.955402 |
| O  | 0.486357  | -5.987958 | 14.250068 |
| O  | -1.264430 | -5.615473 | 12.159609 |
| Ti | -1.120368 | -4.705780 | 13.842928 |
| O  | -2.956814 | -4.032130 | 14.924174 |
| Ti | -0.715546 | -5.423897 | 10.347080 |
| O  | -2.542579 | -4.597157 | 9.914318  |
| Ti | -3.317788 | -3.013372 | 10.807487 |
| Ti | -3.458507 | -2.719149 | 13.672401 |
| O  | -2.677571 | -1.377884 | 10.396154 |
| Ti | -1.485308 | 0.217398  | 10.656588 |
| O  | -2.740664 | 0.521293  | 12.088075 |
| O  | -3.465512 | -1.002941 | 14.399451 |
| Ti | -2.255452 | 0.358560  | 13.842639 |
| O  | -2.013932 | -3.181092 | 12.511796 |
| O  | -1.217449 | 2.078977  | 9.969537  |
| O  | 0.019916  | -0.897479 | 10.085984 |
| Ti | 1.606001  | -2.166403 | 10.388144 |
| O  | -4.637877 | -2.968173 | 12.232328 |
| O  | 1.378485  | -1.939953 | 12.172731 |
| O  | -0.530554 | -0.469842 | 14.330790 |
| Ti | 1.192457  | -1.425206 | 13.987112 |
| O  | -1.691859 | 2.111075  | 14.250855 |
| O  | 7.623840  | -5.718103 | 10.106979 |
| Ti | 9.272526  | -0.581212 | 13.505541 |
| Ti | 9.404523  | -0.880513 | 10.631435 |
| O  | 8.640590  | -2.220620 | 13.923359 |
| Ti | 7.446511  | -3.814972 | 13.701910 |
| O  | 8.667938  | -4.135274 | 12.248553 |
| O  | 9.417358  | -2.612584 | 9.933874  |
| Ti | 8.191647  | -3.956255 | 10.493259 |
| O  | 7.964162  | -0.414178 | 11.795824 |
| O  | 7.155750  | -5.665052 | 14.426726 |
| O  | 5.942130  | -2.686709 | 14.232218 |
| Ti | 4.347751  | -1.418523 | 13.899065 |
| O  | 10.586086 | -0.624902 | 12.070374 |
| O  | 4.591523  | -1.707646 | 12.123682 |

|    |           |           |           |
|----|-----------|-----------|-----------|
| O  | 6.504494  | -3.090439 | 9.965343  |
| Ti | 4.754345  | -2.176900 | 10.301349 |
| Ti | 6.671147  | 1.844821  | 13.949469 |
| O  | 8.505248  | 1.008336  | 14.374017 |
| O  | 5.709114  | -0.258486 | 10.359609 |
| O  | 5.446291  | 2.396489  | 10.104992 |
| O  | 7.223868  | 2.040488  | 12.142417 |
| Ti | 7.067224  | 1.102148  | 10.475681 |
| O  | 8.886138  | 0.414033  | 9.370996  |
| O  | 5.408282  | 0.300323  | 14.206991 |
| Ti | 0.495175  | 2.565193  | 10.869600 |
| O  | 0.439909  | 3.523097  | 12.453045 |
| Ti | 0.182365  | 2.098271  | 13.797993 |
| O  | 0.041143  | 0.969882  | 12.098174 |
| O  | 1.911095  | 2.630833  | 14.710110 |
| O  | 2.232300  | 2.032530  | 10.270811 |
| O  | 3.044433  | -0.722099 | 10.058212 |
| Ti | 4.039672  | 1.039298  | 10.523762 |
| O  | 3.625565  | 1.471721  | 12.276545 |
| O  | 2.644431  | -0.114194 | 14.055421 |
| Ti | 3.641953  | 1.823269  | 14.131884 |
| O  | 5.159024  | 2.993735  | 14.162183 |
| Ti | 6.854936  | -6.884005 | 19.443162 |
| O  | 6.910749  | -7.842287 | 17.860189 |
| Ti | 7.168021  | -6.418019 | 16.514620 |
| O  | 7.309247  | -5.289146 | 18.214419 |
| O  | 5.439582  | -6.949845 | 15.602749 |
| O  | 5.117790  | -6.352264 | 20.042196 |
| O  | 4.305638  | -3.597586 | 20.254347 |
| Ti | 3.310505  | -5.359286 | 19.788802 |
| O  | 3.724416  | -5.791149 | 18.036081 |
| O  | 4.706231  | -4.205203 | 16.256779 |
| Ti | 3.708199  | -6.142774 | 16.180525 |
| O  | 2.191325  | -7.313358 | 16.150595 |
| O  | 1.941302  | -4.620092 | 16.105687 |
| O  | 1.640636  | -4.061965 | 19.952774 |
| O  | 1.903793  | -6.716281 | 20.207553 |
| O  | 0.126001  | -6.360473 | 18.170216 |
| Ti | 0.282970  | -5.421792 | 19.836796 |
| O  | -1.536004 | -4.733344 | 20.941276 |
| Ti | 0.678998  | -6.164361 | 16.363217 |
| O  | -1.155143 | -5.327801 | 15.938697 |
| Ti | -1.922094 | -3.737712 | 16.806873 |
| Ti | -2.054071 | -3.438603 | 19.680839 |
| O  | -1.289751 | -2.098468 | 16.389332 |
| Ti | -0.095775 | -0.503865 | 16.610814 |
| O  | -1.317966 | -0.183427 | 18.063827 |
| O  | -2.066429 | -1.706519 | 20.379173 |
| Ti | -0.841413 | -0.362730 | 19.819030 |
| O  | -0.613978 | -3.905519 | 18.516470 |
| O  | 0.194954  | 1.346204  | 15.885854 |
| O  | 1.408103  | -1.632705 | 16.080073 |

|    |           |           |           |
|----|-----------|-----------|-----------|
| Ti | 3.002158  | -2.901494 | 16.413226 |
| O  | -3.235778 | -3.693405 | 18.242003 |
| O  | 2.758166  | -2.611697 | 18.188601 |
| O  | 0.846082  | -1.228178 | 20.346898 |
| Ti | 2.595662  | -2.142735 | 20.010853 |
| O  | -0.273096 | 1.399226  | 20.204964 |
| O  | 9.042234  | -6.430162 | 16.061628 |
| Ti | 10.667916 | -1.305781 | 19.505414 |
| Ti | 10.808724 | -1.600118 | 16.640250 |
| O  | 10.028177 | -2.941570 | 19.916482 |
| Ti | 8.835854  | -4.536403 | 19.656383 |
| O  | 10.090608 | -4.840656 | 18.224345 |
| O  | 10.816185 | -3.316332 | 15.913707 |
| Ti | 9.605593  | -4.677633 | 16.469765 |
| O  | 9.363876  | -1.138944 | 17.800491 |
| O  | 8.567868  | -6.398123 | 20.343396 |
| O  | 7.330426  | -3.421975 | 20.226832 |
| Ti | 5.744109  | -2.153338 | 19.924359 |
| O  | 11.987926 | -1.350239 | 18.080441 |
| O  | 5.971080  | -2.379991 | 18.139707 |
| O  | 7.880862  | -3.848861 | 15.981777 |
| Ti | 6.157352  | -2.894376 | 16.325259 |
| Ti | 8.065704  | 1.103996  | 19.965805 |
| O  | 9.892793  | 0.277417  | 20.398241 |
| O  | 7.115319  | -0.979361 | 16.357289 |
| O  | 6.863965  | 1.668232  | 16.062709 |
| O  | 8.614822  | 1.295687  | 18.152983 |
| Ti | 8.470691  | 0.385978  | 16.470030 |
| O  | 10.307019 | -0.287159 | 15.388565 |
| O  | 6.791288  | -0.426592 | 20.220931 |
| Ti | 1.898014  | 1.853168  | 16.784532 |
| O  | 1.824275  | 2.832894  | 18.364853 |
| Ti | 1.584070  | 1.417734  | 19.708941 |
| O  | 1.448969  | 0.276138  | 18.046275 |
| O  | 3.314735  | 1.938500  | 20.624513 |
| O  | 3.645092  | 1.333112  | 16.207717 |
| O  | 4.433865  | -1.440372 | 16.079924 |
| Ti | 5.446040  | 0.328409  | 16.488974 |
| O  | 4.997842  | 0.781265  | 18.237665 |
| O  | 4.046512  | -0.824345 | 20.079195 |
| Ti | 5.062992  | 1.094996  | 20.079031 |
| O  | 6.572955  | 2.275986  | 20.127200 |
| Ti | 8.291969  | -7.760508 | 25.305403 |
| O  | 8.341540  | -8.661148 | 23.692591 |
| Ti | 8.599915  | -7.184195 | 22.405100 |
| O  | 8.713284  | -6.118356 | 24.135257 |
| O  | 6.851964  | -7.685341 | 21.506168 |
| O  | 6.586235  | -7.216041 | 25.976080 |
| O  | 5.713697  | -4.506035 | 26.315233 |
| Ti | 4.781327  | -6.256141 | 25.734210 |
| O  | 5.184746  | -6.542836 | 23.964927 |
| O  | 6.092518  | -4.931139 | 22.236594 |

|    |           |           |           |
|----|-----------|-----------|-----------|
| Ti | 5.133366  | -6.879871 | 22.098464 |
| O  | 3.630713  | -8.059954 | 22.075116 |
| O  | 3.350560  | -5.365331 | 22.093050 |
| O  | 3.083742  | -4.983969 | 25.926122 |
| O  | 3.371265  | -7.638141 | 26.039413 |
| O  | 1.522836  | -7.225531 | 24.081534 |
| Ti | 1.714142  | -6.331131 | 25.750293 |
| O  | -0.062733 | -5.675393 | 26.868103 |
| Ti | 2.104814  | -6.928390 | 22.294167 |
| O  | 0.272001  | -6.057407 | 21.913029 |
| Ti | -0.483098 | -4.481400 | 22.825219 |
| Ti | -0.566040 | -4.279616 | 25.698195 |
| O  | 0.100577  | -2.808885 | 22.447631 |
| Ti | 1.304559  | -1.222399 | 22.600448 |
| O  | 0.250047  | -0.913039 | 24.183232 |
| O  | -0.586264 | -2.525510 | 26.362802 |
| Ti | 0.710576  | -1.206882 | 25.930856 |
| O  | 0.853218  | -4.724447 | 24.494157 |
| O  | 1.585242  | 0.624737  | 21.814262 |
| O  | 2.803017  | -2.367554 | 22.096189 |
| Ti | 4.385507  | -3.641294 | 22.451805 |
| O  | -1.775184 | -4.483981 | 24.274815 |
| O  | 4.098365  | -3.322219 | 24.227041 |
| O  | 2.297981  | -2.166144 | 26.467196 |
| Ti | 4.013126  | -3.085159 | 26.093479 |
| O  | 1.392211  | 0.569792  | 26.286064 |
| O  | 10.466701 | -7.165247 | 21.929384 |
| Ti | 12.024709 | -2.108520 | 25.439707 |
| Ti | 12.224361 | -2.334996 | 22.582832 |
| O  | 11.369847 | -3.732933 | 25.769505 |
| Ti | 10.251619 | -5.401696 | 25.590821 |
| O  | 11.482516 | -5.630221 | 24.112012 |
| O  | 12.242364 | -4.041136 | 21.841841 |
| Ti | 11.025316 | -5.416440 | 22.365253 |
| O  | 10.751728 | -1.914530 | 23.729901 |
| O  | 10.054782 | -7.338410 | 26.166943 |
| O  | 8.678884  | -4.481988 | 26.314963 |
| Ti | 7.217909  | -3.158626 | 25.971269 |
| O  | 13.377811 | -2.097621 | 24.058596 |
| O  | 7.385060  | -3.212714 | 24.166163 |
| O  | 9.281121  | -4.594873 | 21.933815 |
| Ti | 7.561680  | -3.644754 | 22.322026 |
| Ti | 9.356890  | 0.222565  | 25.948636 |
| O  | 11.246281 | -0.560600 | 26.338949 |
| O  | 8.471576  | -1.727115 | 22.374498 |
| O  | 8.219680  | 0.908314  | 22.094371 |
| O  | 9.940873  | 0.507302  | 24.163739 |
| Ti | 9.839560  | -0.375223 | 22.467143 |
| O  | 11.714778 | -1.002729 | 21.370038 |
| O  | 8.166785  | -1.361824 | 26.195899 |
| Ti | 3.291470  | 1.186478  | 22.644202 |
| O  | 3.246618  | 2.206046  | 24.228096 |

|    |           |           |           |
|----|-----------|-----------|-----------|
| Ti | 3.072310  | 0.776905  | 25.509183 |
| O  | 2.919753  | -0.391107 | 23.926828 |
| O  | 4.509918  | 0.753814  | 26.755008 |
| O  | 5.069391  | 0.675283  | 22.177083 |
| O  | 5.822072  | -2.183254 | 22.110042 |
| Ti | 6.794062  | -0.406247 | 22.538400 |
| O  | 6.236963  | -0.058546 | 24.297745 |
| O  | 5.486428  | -1.825800 | 26.256398 |
| Ti | 6.369245  | 0.074970  | 26.158913 |
| O  | 7.838323  | 1.331602  | 26.146817 |
| Ti | 9.650121  | -8.068229 | 30.974292 |
| O  | 9.950142  | -9.360881 | 29.614462 |
| Ti | 10.034120 | -8.176006 | 28.132408 |
| O  | 9.585029  | -6.737404 | 29.460743 |
| O  | 8.289596  | -8.702622 | 27.282274 |
| O  | 8.229392  | -8.150440 | 32.110705 |
| O  | 7.268798  | -5.608341 | 32.547919 |
| Ti | 6.482102  | -7.336651 | 31.765357 |
| O  | 6.659173  | -7.679517 | 29.936711 |
| O  | 7.397203  | -5.884559 | 28.276920 |
| Ti | 6.624673  | -7.853499 | 28.032310 |
| O  | 5.146548  | -9.034253 | 27.843845 |
| O  | 4.794854  | -6.331634 | 28.076496 |
| O  | 4.876250  | -5.886459 | 31.497011 |
| O  | 4.967290  | -8.334649 | 32.297411 |
| O  | 3.171880  | -8.346031 | 29.859694 |
| Ti | 3.570855  | -7.354604 | 31.396340 |
| O  | 2.018016  | -7.035119 | 32.495685 |
| Ti | 3.611231  | -7.912158 | 28.068148 |
| O  | 1.734746  | -7.046985 | 27.800434 |
| Ti | 0.962340  | -5.551509 | 28.814935 |
| Ti | 1.290903  | -5.543937 | 31.658204 |
| O  | 1.073300  | -3.728460 | 28.443600 |
| Ti | 2.532941  | -2.519458 | 28.741827 |
| O  | 2.218507  | -2.401189 | 30.606670 |
| O  | 1.450942  | -4.003756 | 32.697906 |
| Ti | 2.767507  | -2.639247 | 32.355004 |
| O  | 2.529555  | -5.616703 | 30.188479 |
| O  | 2.918873  | -0.655698 | 28.467754 |
| O  | 4.070435  | -3.550637 | 28.207643 |
| Ti | 5.799774  | -4.585887 | 28.537157 |
| O  | -0.113190 | -5.741444 | 30.397741 |
| O  | 5.917496  | -3.790465 | 30.250129 |
| O  | 4.314154  | -3.516755 | 32.949911 |
| Ti | 5.807035  | -4.183509 | 32.038706 |
| O  | 3.341727  | -0.853382 | 32.751610 |
| O  | 11.964723 | -7.938307 | 27.955091 |
| Ti | 13.241642 | -3.120343 | 31.521705 |
| Ti | 13.510981 | -3.323005 | 28.725060 |
| O  | 13.192174 | -4.686390 | 32.518799 |
| Ti | 11.835799 | -5.995749 | 32.110136 |
| O  | 12.434812 | -6.163733 | 30.311589 |

|    |           |           |           |
|----|-----------|-----------|-----------|
| O  | 13.790495 | -5.000019 | 28.000761 |
| Ti | 12.352174 | -6.196894 | 28.459623 |
| O  | 12.044746 | -3.332973 | 29.984578 |
| O  | 11.170306 | -7.765930 | 32.041261 |
| O  | 10.347562 | -5.225847 | 32.890497 |
| Ti | 8.809117  | -4.356211 | 32.178410 |
| O  | 14.634588 | -2.936854 | 30.216228 |
| O  | 8.890773  | -4.461205 | 30.376821 |
| O  | 10.856275 | -5.288642 | 27.690347 |
| Ti | 9.030940  | -4.727348 | 28.463127 |
| Ti | 10.885504 | -1.093285 | 31.839836 |
| O  | 12.637638 | -1.632267 | 32.440390 |
| O  | 9.858472  | -2.743279 | 28.391196 |
| O  | 9.540774  | -0.026731 | 28.056896 |
| O  | 11.349391 | -0.600017 | 30.069301 |
| Ti | 11.071623 | -1.319397 | 28.342604 |
| O  | 12.904673 | -2.018560 | 27.517810 |
| O  | 9.846798  | -2.626236 | 32.215315 |
| Ti | 4.624518  | -0.019613 | 28.937355 |
| O  | 4.527729  | 1.131830  | 30.449462 |
| Ti | 4.817248  | -0.269070 | 31.737677 |
| O  | 4.977795  | -1.446844 | 30.284755 |
| O  | 6.432979  | -0.223076 | 32.692096 |
| O  | 6.485743  | -0.233002 | 28.269312 |
| O  | 7.313665  | -3.173329 | 28.162240 |
| Ti | 8.094354  | -1.357797 | 28.572589 |
| O  | 8.139424  | -1.162624 | 30.418959 |
| O  | 7.303197  | -2.990241 | 32.799977 |
| Ti | 8.002308  | -1.198608 | 32.288942 |
| O  | 9.561288  | -0.076324 | 32.693162 |

anatase-like 3-D (1,0,0)-mer

|    |           |           |           |
|----|-----------|-----------|-----------|
| Ti | -1.349698 | 4.434757  | 2.039150  |
| O  | -1.553785 | 4.343507  | 0.206028  |
| O  | -3.390535 | 4.807056  | -1.891553 |
| Ti | -1.513532 | 4.700245  | -1.675295 |
| O  | -0.266745 | 6.132170  | -1.951921 |
| O  | 0.029519  | 5.758522  | 2.244344  |
| O  | -0.415490 | 3.001709  | 2.802412  |
| Ti | 0.423847  | 1.494015  | 2.080774  |
| O  | 0.397634  | 1.550300  | 0.219163  |
| O  | -0.565868 | 3.089209  | -2.242997 |
| Ti | 0.324864  | 1.432436  | -1.666424 |
| O  | 1.129553  | -0.584867 | -1.719961 |
| O  | 1.192265  | -0.430706 | 2.589870  |
| Ti | 1.614087  | 5.460289  | 1.306431  |
| O  | 2.029118  | 6.853531  | 0.032058  |
| Ti | 1.547622  | 5.820697  | -1.470581 |
| O  | 1.229033  | 4.358165  | -0.178079 |
| O  | 3.073864  | 4.698949  | -2.144220 |
| O  | 3.031508  | 4.697091  | 2.279048  |
| O  | 2.377077  | 1.872393  | 2.472628  |

|    |           |           |           |
|----|-----------|-----------|-----------|
| Ti | 3.880640  | 3.041092  | 1.959465  |
| O  | 3.980784  | 2.949552  | 0.077303  |
| O  | 2.302539  | 1.784625  | -2.122185 |
| Ti | 3.884743  | 2.971475  | -1.765164 |
| O  | 5.846421  | 3.348404  | -2.234994 |
| O  | 4.719255  | 0.868087  | -1.856037 |
| O  | 4.723620  | 0.873178  | 1.951545  |
| O  | 5.800539  | 3.194997  | 2.342319  |
| O  | 7.113335  | 1.785418  | -0.196687 |
| Ti | 6.433275  | 1.610048  | 1.567202  |
| O  | 7.500777  | 0.169783  | 2.233460  |
| Ti | 6.503250  | 1.456141  | -1.939912 |
| O  | 7.334156  | -0.322350 | -2.571098 |
| Ti | 7.049570  | -1.758573 | -1.352847 |
| Ti | 7.075975  | -1.462013 | 1.431728  |
| O  | 6.401134  | -3.446102 | -1.835018 |
| Ti | 4.568728  | -3.669000 | -1.409429 |
| O  | 4.405211  | -3.578025 | 0.448025  |
| O  | 6.319891  | -2.811684 | 2.462609  |
| Ti | 4.442909  | -3.238523 | 2.305291  |
| O  | 5.852971  | -1.066938 | -0.022104 |
| O  | 3.496575  | -5.099832 | -1.977448 |
| O  | 3.802771  | -2.117426 | -2.188888 |
| Ti | 3.046297  | -0.331711 | -1.713347 |
| O  | 8.295375  | -2.005046 | 0.059952  |
| O  | 2.993838  | -0.485659 | 0.180672  |
| O  | 3.719183  | -1.663678 | 2.921483  |
| Ti | 3.034713  | -0.163468 | 1.986654  |
| Ti | -7.081856 | 1.355149  | 1.373703  |
| Ti | -7.422667 | 1.543980  | -1.397212 |
| O  | -6.277256 | 2.734739  | 2.318262  |
| Ti | -4.400954 | 3.097587  | 2.055971  |
| O  | -4.404819 | 3.313039  | 0.225102  |
| O  | -6.510675 | 3.124689  | -1.901335 |
| Ti | -4.624592 | 3.374162  | -1.676992 |
| O  | -6.061575 | 0.843308  | -0.153758 |
| O  | -3.133577 | 4.355326  | 2.686699  |
| O  | -3.782958 | 1.468895  | 2.766031  |
| Ti | -2.988414 | 0.062362  | 1.857262  |
| O  | -8.455245 | 1.902483  | 0.148151  |
| O  | -2.748690 | 0.470808  | 0.067202  |
| O  | -3.889109 | 1.653227  | -2.222514 |
| Ti | -3.158572 | -0.104644 | -1.672070 |
| Ti | -6.368711 | -1.695352 | 1.576302  |
| O  | -7.322756 | -0.246953 | 2.333188  |
| O  | -4.806763 | -1.260327 | -1.951277 |
| O  | -5.865953 | -3.754014 | -1.915579 |
| O  | -7.222370 | -2.138989 | -0.006475 |
| Ti | -6.606628 | -2.018601 | -1.799740 |
| O  | -7.746760 | -0.276373 | -2.148799 |
| O  | -4.568354 | -1.086281 | 1.395741  |
| Ti | -1.327733 | -5.600123 | -1.427489 |



|    |           |           |           |
|----|-----------|-----------|-----------|
| O  | -1.939633 | -6.670323 | -0.004448 |
| Ti | -1.480962 | -5.401300 | 1.363876  |
| O  | -1.015998 | -4.205318 | -0.122509 |
| O  | -2.823225 | -4.719444 | 2.421166  |
| O  | -2.757268 | -5.025098 | -2.572164 |
| O  | -2.394894 | -2.146138 | -1.819550 |
| Ti | -3.958451 | -3.489466 | -1.838595 |
| O  | -3.852753 | -3.564823 | 0.039758  |
| O  | -2.368662 | -1.935539 | 2.456966  |
| Ti | -3.822421 | -3.159072 | 1.878710  |
| O  | -5.650817 | -3.194255 | 2.482646  |
| O  | -1.165490 | 0.345375  | 2.544033  |
| O  | -1.242503 | 0.213864  | -2.144654 |
| Ti | 1.683223  | -4.894813 | -1.477473 |
| O  | 1.798069  | -4.554824 | 0.364163  |
| O  | 3.215728  | -4.529566 | 2.947338  |
| Ti | 1.464307  | -4.552607 | 2.221590  |
| O  | 0.077967  | -5.861325 | 2.284763  |
| O  | 0.404447  | -6.234534 | -1.843102 |
| O  | 0.764615  | -3.372362 | -2.170351 |
| Ti | -0.440694 | -1.871513 | -1.641608 |
| O  | -0.353091 | -1.670553 | 0.279753  |
| O  | 0.510329  | -3.090043 | 2.830021  |
| Ti | -0.399351 | -1.586480 | 2.105068  |
| Ti | -2.562262 | 6.400575  | -4.636824 |
| O  | -2.677232 | 6.062384  | -6.478666 |
| O  | -4.095059 | 6.036508  | -9.062147 |
| Ti | -2.343571 | 6.060120  | -8.335365 |
| O  | -0.957116 | 7.367996  | -8.399751 |
| O  | -1.283217 | 7.741430  | -4.270884 |
| O  | -1.645862 | 4.878956  | -3.944938 |
| Ti | -0.439695 | 3.376408  | -4.473009 |
| O  | -0.515753 | 3.176412  | -6.394403 |
| O  | -1.390475 | 4.596641  | -8.944974 |
| Ti | -0.480720 | 3.089369  | -8.219587 |
| O  | 0.285347  | 1.160763  | -8.658592 |
| O  | 0.362311  | 1.291272  | -3.970323 |
| Ti | 0.448689  | 7.106580  | -4.687313 |
| O  | 1.060434  | 8.177367  | -6.110380 |
| Ti | 0.601959  | 6.908421  | -7.478792 |
| O  | 0.136830  | 5.712474  | -5.992735 |
| O  | 1.943721  | 6.226093  | -8.536053 |
| O  | 1.878569  | 6.531580  | -3.542859 |
| O  | 1.514808  | 3.651569  | -4.295729 |
| Ti | 3.078125  | 4.995204  | -4.276362 |
| O  | 2.972390  | 5.070211  | -6.154858 |
| O  | 1.488324  | 3.441544  | -8.571596 |
| Ti | 2.940832  | 4.664755  | -7.993784 |
| O  | 4.770872  | 4.700117  | -8.598102 |
| O  | 3.688025  | 2.592375  | -7.510187 |
| O  | 3.926613  | 2.766013  | -4.163708 |
| O  | 4.985728  | 5.259999  | -4.199682 |

|    |           |           |           |
|----|-----------|-----------|-----------|
| O  | 6.342363  | 3.644866  | -6.108577 |
| Ti | 5.726181  | 3.524576  | -4.315316 |
| O  | 6.866666  | 1.782472  | -3.966211 |
| Ti | 5.488340  | 3.201403  | -7.691217 |
| O  | 6.442375  | 1.753127  | -8.448272 |
| Ti | 6.202173  | 0.151093  | -7.488875 |
| Ti | 6.543737  | -0.037678 | -4.717910 |
| O  | 5.398092  | -1.228799 | -8.433252 |
| Ti | 3.521588  | -1.590999 | -8.171749 |
| O  | 3.525441  | -1.806762 | -6.339555 |
| O  | 5.631701  | -1.618999 | -4.213901 |
| Ti | 3.745765  | -1.867918 | -4.438211 |
| O  | 5.181733  | 0.662362  | -5.962287 |
| O  | 2.254311  | -2.848473 | -8.801413 |
| O  | 2.903778  | 0.037509  | -8.881564 |
| Ti | 2.107996  | 1.445952  | -7.972110 |
| O  | 7.575777  | -0.396028 | -6.262044 |
| O  | 1.868144  | 1.034346  | -6.182223 |
| O  | 3.009722  | -0.147363 | -3.892365 |
| Ti | 2.278440  | 1.610207  | -4.442942 |
| Ti | -7.928905 | 3.264836  | -4.761688 |
| Ti | -7.955269 | 2.968422  | -7.546388 |
| O  | -7.280593 | 4.952335  | -4.278692 |
| Ti | -5.445734 | 5.175702  | -4.704739 |
| O  | -5.284821 | 5.084629  | -6.562772 |
| O  | -7.199144 | 4.317641  | -8.577246 |
| Ti | -5.322163 | 4.744804  | -8.419765 |
| O  | -6.732499 | 2.572883  | -6.092512 |
| O  | -4.375687 | 6.605981  | -4.136853 |
| O  | -4.681841 | 3.623535  | -3.926492 |
| Ti | -3.925878 | 1.837435  | -4.401546 |
| O  | -9.174612 | 3.511777  | -6.174388 |
| O  | -3.873964 | 1.990415  | -6.295600 |
| O  | -4.598692 | 3.170361  | -9.035585 |
| Ti | -3.914616 | 1.669529  | -8.101695 |
| Ti | -7.383315 | 0.049997  | -4.175055 |
| O  | -8.214112 | 1.828471  | -3.543950 |
| O  | -5.603902 | 0.632853  | -8.067333 |
| O  | -6.680910 | -1.688907 | -8.457593 |
| O  | -7.993118 | -0.279088 | -5.918382 |
| Ti | -7.313466 | -0.103850 | -7.682479 |
| O  | -8.380957 | 1.336641  | -8.348085 |
| O  | -5.599245 | 0.637735  | -4.258492 |
| Ti | -2.493550 | -3.953609 | -7.421254 |
| O  | -2.908197 | -5.346954 | -6.146826 |
| Ti | -2.426747 | -4.314034 | -4.644279 |
| O  | -2.108767 | -2.851223 | -5.936599 |
| O  | -3.953867 | -3.193220 | -3.970757 |
| O  | -3.911055 | -3.191070 | -8.393898 |
| O  | -3.257299 | -0.366737 | -8.587691 |
| Ti | -4.760903 | -1.535329 | -8.074716 |
| O  | -4.861466 | -1.443796 | -6.192398 |

|    |           |           |           |
|----|-----------|-----------|-----------|
| O  | -3.182791 | -0.279298 | -3.992709 |
| Ti | -4.764982 | -1.465927 | -4.350161 |
| O  | -6.726698 | -1.842429 | -3.880054 |
| O  | -2.009614 | 2.089667  | -4.394662 |
| O  | -2.072384 | 1.936464  | -8.705163 |
| Ti | 0.470182  | -2.927616 | -8.154954 |
| O  | 0.674438  | -2.835424 | -6.319693 |
| O  | 2.511761  | -3.301065 | -4.223732 |
| Ti | 0.634740  | -3.193909 | -4.439847 |
| O  | -0.612027 | -4.625631 | -4.163885 |
| O  | -0.908810 | -4.251717 | -8.358466 |
| O  | -0.464028 | -1.495877 | -8.917787 |
| Ti | -1.303970 | 0.012177  | -8.196007 |
| O  | -1.277660 | -0.045086 | -6.335264 |
| O  | -0.313914 | -1.583584 | -3.871356 |
| Ti | -1.205204 | 0.074030  | -4.448799 |

anatase-like 3-D (1,0,1)-mer

|    |           |           |           |
|----|-----------|-----------|-----------|
| Ti | -1.367863 | 4.403897  | 2.140568  |
| O  | -1.609954 | 4.215393  | 0.319477  |
| O  | -3.410428 | 4.741101  | -1.863088 |
| Ti | -1.555982 | 4.589426  | -1.557867 |
| O  | -0.310800 | 6.015305  | -1.795927 |
| O  | 0.016685  | 5.738536  | 2.221384  |
| O  | -0.375990 | 3.055824  | 2.979339  |
| Ti | 0.450548  | 1.528704  | 2.281692  |
| O  | 0.460999  | 1.546401  | 0.416854  |
| O  | -0.634494 | 2.945526  | -2.069610 |
| Ti | 0.302054  | 1.311782  | -1.457051 |
| O  | 1.072801  | -0.700450 | -1.561640 |
| O  | 1.215250  | -0.347172 | 2.906004  |
| Ti | 1.609430  | 5.404240  | 1.304834  |
| O  | 2.023785  | 6.761825  | -0.008208 |
| Ti | 1.529233  | 5.687014  | -1.478655 |
| O  | 1.265243  | 4.242820  | -0.147588 |
| O  | 3.150631  | 4.648147  | -2.113085 |
| O  | 3.034596  | 4.694703  | 2.302394  |
| O  | 2.436097  | 1.881940  | 2.619169  |
| Ti | 3.899129  | 3.038110  | 2.013016  |
| O  | 4.041920  | 2.924971  | 0.123970  |
| O  | 2.303754  | 1.658689  | -1.942261 |
| Ti | 3.910682  | 2.882195  | -1.712278 |
| O  | 5.859325  | 3.194453  | -2.285593 |
| O  | 4.705432  | 0.732084  | -1.762513 |
| O  | 4.719423  | 0.855974  | 1.937050  |
| O  | 5.812120  | 3.189045  | 2.403626  |
| O  | 7.107861  | 1.740833  | -0.164367 |
| Ti | 6.423497  | 1.603775  | 1.605718  |
| O  | 7.566009  | 0.273724  | 2.361614  |
| Ti | 6.487777  | 1.325330  | -1.889129 |
| O  | 7.475835  | -0.369566 | -2.484961 |
| Ti | 7.349568  | -1.735545 | -1.188315 |

|    |           |           |           |
|----|-----------|-----------|-----------|
| Ti | 7.283571  | -1.401273 | 1.595418  |
| O  | 6.755735  | -3.401017 | -1.747518 |
| Ti | 4.951627  | -3.691875 | -1.212592 |
| O  | 4.933579  | -3.753375 | 0.639366  |
| O  | 6.551740  | -2.713494 | 2.673645  |
| Ti | 4.683219  | -3.214064 | 2.437726  |
| O  | 6.071124  | -1.104644 | 0.100497  |
| O  | 4.010966  | -5.071944 | -1.994467 |
| O  | 3.932729  | -2.175118 | -1.867672 |
| Ti | 3.001318  | -0.433855 | -1.488853 |
| O  | 8.570775  | -1.895540 | 0.261787  |
| O  | 2.913800  | -0.607049 | 0.391089  |
| O  | 3.906730  | -1.635574 | 3.026313  |
| Ti | 3.035993  | -0.188268 | 2.182030  |
| Ti | -7.099861 | 1.288365  | 1.352784  |
| Ti | -7.498911 | 1.490079  | -1.424832 |
| O  | -6.335986 | 2.681616  | 2.317041  |
| Ti | -4.456862 | 3.090151  | 2.123721  |
| O  | -4.521784 | 3.406278  | 0.298303  |
| O  | -6.610964 | 3.125490  | -1.846030 |
| Ti | -4.735345 | 3.368951  | -1.599183 |
| O  | -6.093573 | 0.806150  | -0.194509 |
| O  | -3.156724 | 4.310434  | 2.778998  |
| O  | -3.862486 | 1.458646  | 2.857552  |
| Ti | -2.971833 | 0.092985  | 1.965018  |
| O  | -8.512396 | 1.788890  | 0.151653  |
| O  | -2.798454 | 0.620702  | 0.200741  |
| O  | -4.057574 | 1.624419  | -2.126221 |
| Ti | -3.299890 | -0.104762 | -1.486119 |
| Ti | -6.279209 | -1.742306 | 1.577933  |
| O  | -7.254016 | -0.305509 | 2.336207  |
| O  | -4.942225 | -1.250970 | -1.938442 |
| O  | -5.963831 | -3.767264 | -1.941234 |
| O  | -7.215820 | -2.175318 | 0.027432  |
| Ti | -6.710432 | -2.033592 | -1.802204 |
| O  | -7.857241 | -0.311365 | -2.195118 |
| O  | -4.484350 | -1.112186 | 1.369076  |
| Ti | -0.897285 | -5.237831 | -1.808679 |
| O  | -1.492440 | -6.394747 | -0.388846 |
| Ti | -1.294756 | -5.194966 | 1.043643  |
| O  | -0.987423 | -3.793579 | -0.228433 |
| O  | -2.639665 | -4.713175 | 2.252634  |
| O  | -2.783857 | -4.937245 | -2.515590 |
| O  | -2.582217 | -2.082255 | -1.632789 |
| Ti | -4.052335 | -3.527674 | -1.769984 |
| O  | -3.977987 | -3.580478 | 0.099514  |
| O  | -2.354286 | -1.899720 | 2.615954  |
| Ti | -3.734786 | -3.177157 | 1.940845  |
| O  | -5.557394 | -3.184993 | 2.576690  |
| O  | -1.184650 | 0.436144  | 2.742500  |
| O  | -1.335361 | 0.190134  | -1.944162 |
| Ti | 2.115960  | -4.658659 | -1.816572 |

|    |           |           |           |
|----|-----------|-----------|-----------|
| O  | 2.112412  | -4.121890 | 0.047035  |
| O  | 3.317934  | -4.439754 | 2.812615  |
| Ti | 1.659196  | -4.330435 | 1.858426  |
| O  | 0.322111  | -5.651857 | 1.896963  |
| O  | 0.899159  | -6.047094 | -1.969201 |
| O  | 0.439905  | -3.449381 | -2.116299 |
| Ti | -0.607195 | -1.891046 | -1.368827 |
| O  | -0.445411 | -1.385950 | 0.508664  |
| O  | 0.680955  | -2.984957 | 2.726293  |
| Ti | -0.385578 | -1.487625 | 2.319378  |
| Ti | -2.539134 | 6.407331  | -4.321063 |
| O  | -2.770682 | 6.201950  | -6.155774 |
| O  | -4.095854 | 6.529380  | -8.583387 |
| Ti | -2.134982 | 6.297625  | -7.939886 |
| O  | -1.011796 | 7.921491  | -8.256372 |
| O  | -1.124766 | 7.694418  | -4.190135 |
| O  | -1.502359 | 4.858978  | -3.849467 |
| Ti | -0.481565 | 3.205784  | -4.264163 |
| O  | -0.480493 | 3.157533  | -6.160286 |
| O  | -1.245722 | 4.713954  | -8.537480 |
| Ti | -0.427731 | 2.986230  | -8.002775 |
| O  | 0.362719  | 0.968714  | -7.992593 |
| O  | 0.328685  | 1.142763  | -3.805476 |
| Ti | 0.491547  | 7.038595  | -4.869113 |
| O  | 1.324769  | 8.299405  | -6.073035 |
| Ti | 0.834386  | 7.414343  | -7.663527 |
| O  | -0.033028 | 6.085208  | -6.477635 |
| O  | 2.251568  | 6.229593  | -8.279836 |
| O  | 1.757816  | 6.288252  | -3.645572 |
| O  | 1.466022  | 3.516112  | -4.084521 |
| Ti | 3.064157  | 4.763923  | -4.232898 |
| O  | 2.899078  | 4.799511  | -6.104858 |
| O  | 1.548457  | 3.313403  | -8.412829 |
| Ti | 3.114265  | 4.489151  | -7.925090 |
| O  | 5.079423  | 4.865771  | -8.316763 |
| O  | 3.946410  | 2.445015  | -7.871129 |
| O  | 3.914328  | 2.579634  | -4.031766 |
| O  | 5.007123  | 5.004511  | -4.349904 |
| O  | 6.395476  | 3.221332  | -6.232108 |
| Ti | 5.727978  | 3.281286  | -4.411705 |
| O  | 6.849812  | 1.582460  | -3.967961 |
| Ti | 5.760788  | 2.988539  | -7.962293 |
| O  | 6.482365  | 1.199048  | -8.665133 |
| Ti | 6.245849  | -0.274016 | -7.453449 |
| Ti | 6.543075  | -0.238041 | -4.661715 |
| O  | 5.568751  | -1.902788 | -8.095555 |
| Ti | 3.737277  | -2.260374 | -7.754189 |
| O  | 3.665859  | -2.490460 | -5.927785 |
| O  | 5.564410  | -1.687559 | -3.995293 |
| Ti | 3.674623  | -2.108029 | -4.064599 |
| O  | 5.203065  | 0.339805  | -6.006962 |
| O  | 2.572766  | -3.557432 | -8.496835 |

|    |           |           |           |
|----|-----------|-----------|-----------|
| O  | 2.988781  | -0.590571 | -8.351630 |
| Ti | 2.287560  | 1.215159  | -7.955849 |
| O  | 7.620818  | -0.656634 | -6.177054 |
| O  | 2.299757  | 1.224812  | -6.050987 |
| O  | 2.837243  | -0.411727 | -3.718191 |
| Ti | 2.242908  | 1.441853  | -4.243664 |
| Ti | -8.004431 | 3.287738  | -4.776423 |
| Ti | -8.301902 | 3.250663  | -7.568098 |
| O  | -7.327854 | 4.914771  | -4.134071 |
| Ti | -5.495568 | 5.272988  | -4.475378 |
| O  | -5.424451 | 5.502552  | -6.302093 |
| O  | -7.322885 | 4.699709  | -8.234579 |
| Ti | -5.432822 | 5.120753  | -8.165221 |
| O  | -6.962139 | 2.671873  | -6.223153 |
| O  | -4.331420 | 6.570012  | -3.732457 |
| O  | -4.747393 | 3.602630  | -3.878612 |
| Ti | -4.048150 | 1.796702  | -4.274090 |
| O  | -9.379383 | 3.669217  | -6.052832 |
| O  | -4.059290 | 1.786266  | -6.179123 |
| O  | -4.596340 | 3.423748  | -8.511571 |
| Ti | -4.002915 | 1.570131  | -7.986218 |
| Ti | -7.520428 | 0.025092  | -4.267680 |
| O  | -8.241816 | 1.812781  | -3.563818 |
| O  | -5.674065 | 0.432165  | -8.198038 |
| O  | -6.767171 | -1.992508 | -7.880394 |
| O  | -8.155201 | -0.209420 | -5.997733 |
| Ti | -7.487907 | -0.269154 | -7.818343 |
| O  | -8.609369 | 1.429782  | -8.261851 |
| O  | -5.706091 | 0.566681  | -4.358904 |
| Ti | -2.250490 | -4.026328 | -7.360659 |
| O  | -3.082613 | -5.286837 | -6.156202 |
| Ti | -2.592833 | -4.401190 | -4.566371 |
| O  | -1.727029 | -3.071443 | -5.752590 |
| O  | -4.011323 | -3.217919 | -3.949780 |
| O  | -3.516605 | -3.275944 | -8.584824 |
| O  | -3.225838 | -0.504486 | -8.145470 |
| Ti | -4.824160 | -1.752068 | -7.997226 |
| O  | -4.659272 | -1.788368 | -6.125226 |
| O  | -3.308696 | -0.301965 | -3.817522 |
| Ti | -4.873851 | -1.477601 | -4.304985 |
| O  | -6.839473 | -1.853741 | -3.913253 |
| O  | -2.122517 | 2.042847  | -4.237308 |
| O  | -2.088675 | 1.869206  | -8.424545 |
| Ti | 0.780157  | -3.395024 | -7.908115 |
| O  | 1.011353  | -3.187473 | -6.073144 |
| O  | 2.337813  | -3.517185 | -3.645957 |
| Ti | 0.376996  | -3.284598 | -4.289173 |
| O  | -0.746381 | -4.908239 | -3.973551 |
| O  | -0.633555 | -4.681088 | -8.038620 |
| O  | -0.259019 | -1.845917 | -8.380930 |
| Ti | -1.279194 | -0.193711 | -7.965822 |
| O  | -1.280342 | -0.145573 | -6.069807 |

|    |           |           |            |
|----|-----------|-----------|------------|
| O  | -0.513635 | -1.702040 | -3.692041  |
| Ti | -1.332321 | 0.025168  | -4.227312  |
| Ti | -3.873603 | 7.671691  | -10.412600 |
| O  | -3.870855 | 7.134695  | -12.276455 |
| O  | -5.076953 | 7.453220  | -15.042712 |
| Ti | -3.417986 | 7.343466  | -14.086818 |
| O  | -2.080745 | 8.664214  | -14.126224 |
| O  | -2.657704 | 9.059561  | -10.260606 |
| O  | -2.196776 | 6.461320  | -10.112803 |
| Ti | -1.152541 | 4.902190  | -10.861034 |
| O  | -1.316968 | 4.398435  | -12.738340 |
| O  | -2.440755 | 5.997569  | -14.956195 |
| Ti | -1.374298 | 4.499869  | -14.549271 |
| O  | -0.575356 | 2.575860  | -14.972241 |
| O  | -0.424766 | 2.821972  | -10.285853 |
| Ti | -0.861189 | 8.250681  | -10.420972 |
| O  | -0.265753 | 9.407094  | -11.841477 |
| Ti | -0.463821 | 8.207517  | -13.273266 |
| O  | -0.771412 | 6.805939  | -12.001345 |
| O  | 0.880513  | 7.725620  | -14.482778 |
| O  | 1.025837  | 7.950018  | -9.713792  |
| O  | 0.822626  | 5.094418  | -10.597116 |
| Ti | 2.289834  | 6.539582  | -10.459893 |
| O  | 2.218337  | 6.592360  | -12.329342 |
| O  | 0.594242  | 4.911794  | -14.845975 |
| Ti | 1.974057  | 6.189315  | -14.170790 |
| O  | 3.797722  | 6.196750  | -14.806973 |
| O  | 2.724306  | 4.124535  | -13.598125 |
| O  | 3.182337  | 4.262854  | -10.291859 |
| O  | 4.204652  | 6.779663  | -10.288643 |
| O  | 5.456055  | 5.187455  | -12.257195 |
| Ti | 4.950845  | 5.045327  | -10.427707 |
| O  | 6.097468  | 3.323602  | -10.034898 |
| Ti | 4.519004  | 4.754288  | -13.807655 |
| O  | 5.493621  | 3.317913  | -14.566580 |
| Ti | 5.340918  | 1.723840  | -13.582773 |
| Ti | 5.739404  | 1.522163  | -10.805219 |
| O  | 4.577137  | 0.330394  | -14.547332 |
| Ti | 2.697659  | -0.077330 | -14.353325 |
| O  | 2.762828  | -0.393739 | -12.528962 |
| O  | 4.852158  | -0.113417 | -10.384157 |
| Ti | 2.976704  | -0.356672 | -10.631040 |
| O  | 4.333967  | 2.205626  | -12.035608 |
| O  | 1.397677  | -1.297063 | -15.009061 |
| O  | 2.103909  | 1.554187  | -15.087693 |
| Ti | 1.211702  | 2.919525  | -14.194451 |
| O  | 6.753110  | 1.223652  | -12.382119 |
| O  | 1.037923  | 2.390514  | -12.430761 |
| O  | 2.298459  | 1.387715  | -10.103749 |
| Ti | 1.539717  | 3.116648  | -10.743945 |
| Ti | -9.108201 | 4.748625  | -11.040632 |
| Ti | -9.042720 | 4.414445  | -13.824512 |

|    |            |           |            |
|----|------------|-----------|------------|
| O  | -8.513881  | 6.413543  | -10.481222 |
| Ti | -6.709998  | 6.705054  | -11.016815 |
| O  | -6.692456  | 6.765649  | -12.868834 |
| O  | -8.310632  | 5.726234  | -14.902832 |
| Ti | -6.442323  | 6.227408  | -14.666244 |
| O  | -7.830110  | 4.117377  | -12.329684 |
| O  | -5.769537  | 8.084797  | -10.234437 |
| O  | -5.691195  | 5.187899  | -10.362286 |
| Ti | -4.760839  | 3.446106  | -10.740842 |
| O  | -10.329535 | 4.909086  | -12.490658 |
| O  | -4.673602  | 3.618437  | -12.620982 |
| O  | -5.666074  | 4.648800  | -15.255678 |
| Ti | -4.795863  | 3.200506  | -14.412087 |
| Ti | -8.247359  | 1.687148  | -10.340623 |
| O  | -9.235170  | 3.381961  | -9.744215  |
| O  | -6.479611  | 2.156601  | -14.167725 |
| O  | -7.571733  | -0.176356 | -14.634011 |
| O  | -8.867302  | 1.271717  | -12.065555 |
| Ti | -8.183504  | 1.409064  | -13.835716 |
| O  | -9.326138  | 2.739400  | -14.590743 |
| O  | -6.464980  | 2.280113  | -10.467174 |
| Ti | -3.367727  | -2.391721 | -13.534479 |
| O  | -3.782614  | -3.748849 | -12.221765 |
| Ti | -3.288035  | -2.674290 | -10.751149 |
| O  | -3.025040  | -1.229703 | -12.081950 |
| O  | -4.910461  | -1.636369 | -10.116942 |
| O  | -4.794033  | -1.682008 | -14.532453 |
| O  | -4.196367  | 1.130278  | -14.849225 |
| Ti | -5.659570  | -0.025705 | -14.242937 |
| O  | -5.802242  | 0.087185  | -12.354023 |
| O  | -4.063766  | 1.353124  | -10.287616 |
| Ti | -5.670612  | 0.129586  | -10.517763 |
| O  | -7.619187  | -0.182171 | -9.944451  |
| O  | -2.832418  | 3.712637  | -10.668242 |
| O  | -2.975189  | 3.359489  | -15.136132 |
| Ti | -0.391438  | -1.390751 | -14.370063 |
| O  | -0.149203  | -1.200945 | -12.549228 |
| O  | 1.651422   | -1.728725 | -10.367341 |
| Ti | -0.202710  | -1.576598 | -10.672265 |
| O  | -1.447939  | -3.002517 | -10.434717 |
| O  | -1.775580  | -2.724851 | -14.449881 |
| O  | -1.383486  | -0.043378 | -15.209878 |
| Ti | -2.210618  | 1.483583  | -14.511916 |
| O  | -2.221081  | 1.465682  | -12.646944 |
| O  | -1.125037  | 0.066838  | -10.159980 |
| Ti | -2.061867  | 1.700695  | -10.773112 |

anatase-like 3-D (1,0,2)-mer

|    |           |          |           |
|----|-----------|----------|-----------|
| Ti | -1.341876 | 4.467772 | 2.162908  |
| O  | -1.672674 | 4.295796 | 0.331811  |
| O  | -3.150029 | 4.945919 | -2.219845 |
| Ti | -1.330580 | 4.645744 | -1.492229 |



|    |           |           |           |
|----|-----------|-----------|-----------|
| O  | -0.208731 | 6.162120  | -1.582951 |
| O  | 0.035318  | 5.795169  | 2.262037  |
| O  | -0.371829 | 3.097380  | 2.978375  |
| Ti | 0.487453  | 1.544069  | 2.358033  |
| O  | 0.585749  | 1.580832  | 0.503110  |
| O  | -0.412673 | 3.005838  | -1.932740 |
| Ti | 0.433764  | 1.255731  | -1.360591 |
| O  | 1.237023  | -0.701616 | -1.506344 |
| O  | 1.218603  | -0.347496 | 2.975101  |
| Ti | 1.665903  | 5.441285  | 1.409284  |
| O  | 2.180983  | 6.799351  | 0.135394  |
| Ti | 1.649699  | 5.779829  | -1.366011 |
| O  | 1.309176  | 4.316475  | -0.065282 |
| O  | 3.220337  | 4.705897  | -2.025564 |
| O  | 3.031145  | 4.678696  | 2.440141  |
| O  | 2.470628  | 1.858352  | 2.756247  |
| Ti | 3.904198  | 3.025621  | 2.121115  |
| O  | 4.071467  | 2.991806  | 0.227081  |
| O  | 2.439899  | 1.621405  | -1.836371 |
| Ti | 3.965784  | 2.928831  | -1.619321 |
| O  | 5.894778  | 3.324838  | -2.208554 |
| O  | 4.825497  | 0.817335  | -1.638162 |
| O  | 4.709341  | 0.858679  | 1.912199  |
| O  | 5.801074  | 3.152264  | 2.562323  |
| O  | 7.168519  | 1.920512  | -0.090811 |
| Ti | 6.419355  | 1.636462  | 1.628793  |
| O  | 7.509575  | 0.170572  | 2.105154  |
| Ti | 6.599369  | 1.491551  | -1.820747 |
| O  | 7.579068  | -0.134450 | -2.467141 |
| Ti | 6.937076  | -1.770936 | -1.581757 |
| Ti | 7.069347  | -1.428757 | 1.226473  |
| O  | 6.546573  | -3.620594 | -1.863236 |
| Ti | 4.880997  | -3.998324 | -1.124310 |
| O  | 5.000928  | -4.112339 | 0.713149  |
| O  | 6.489500  | -2.700121 | 2.439872  |
| Ti | 4.647611  | -3.311185 | 2.408828  |
| O  | 5.719312  | -1.156594 | -0.173933 |
| O  | 3.953535  | -5.286316 | -2.064089 |
| O  | 3.848475  | -2.399120 | -1.726860 |
| Ti | 3.215843  | -0.493528 | -1.342659 |
| O  | 8.235167  | -1.930159 | -0.172674 |
| O  | 2.908486  | -0.697718 | 0.514109  |
| O  | 3.929235  | -1.705274 | 3.058953  |
| Ti | 3.060478  | -0.224147 | 2.282038  |
| Ti | -6.953785 | 1.349475  | 1.219005  |
| Ti | -7.368948 | 1.550853  | -1.544339 |
| O  | -6.259459 | 2.818190  | 2.131941  |
| Ti | -4.396084 | 3.249483  | 1.971653  |
| O  | -4.430203 | 3.789148  | 0.166036  |
| O  | -6.469536 | 3.183747  | -1.906891 |
| Ti | -4.603768 | 3.586771  | -1.707844 |
| O  | -5.912256 | 0.898744  | -0.305549 |

|    |           |           |           |
|----|-----------|-----------|-----------|
| O  | -3.136854 | 4.420738  | 2.778342  |
| O  | -3.850424 | 1.586134  | 2.703565  |
| Ti | -2.921172 | 0.181410  | 1.912100  |
| O  | -8.386245 | 1.805321  | 0.037240  |
| O  | -2.683712 | 0.816917  | 0.203948  |
| O  | -3.849903 | 1.862779  | -2.074477 |
| Ti | -3.278630 | 0.014211  | -1.437807 |
| Ti | -6.157707 | -1.691527 | 1.462616  |
| O  | -7.098566 | -0.234686 | 2.220765  |
| O  | -4.891916 | -1.115963 | -1.946603 |
| O  | -5.780422 | -3.698609 | -2.077487 |
| O  | -7.130305 | -2.170640 | -0.052582 |
| Ti | -6.591336 | -1.995680 | -1.868013 |
| O  | -7.746683 | -0.274852 | -2.267295 |
| O  | -4.369277 | -1.059109 | 1.194466  |
| Ti | -0.824377 | -5.189044 | -1.971822 |
| O  | -1.522631 | -6.331544 | -0.548889 |
| Ti | -1.286657 | -5.175052 | 0.888480  |
| O  | -0.900397 | -3.752817 | -0.338850 |
| O  | -2.578871 | -4.690589 | 2.170229  |
| O  | -2.705291 | -4.900853 | -2.690982 |
| O  | -2.508225 | -1.960810 | -1.655157 |
| Ti | -3.873826 | -3.473201 | -1.878179 |
| O  | -3.849108 | -3.546317 | 0.004206  |
| O  | -2.330916 | -1.838409 | 2.563062  |
| Ti | -3.636588 | -3.146250 | 1.848657  |
| O  | -5.458346 | -3.114858 | 2.487766  |
| O  | -1.160215 | 0.462938  | 2.771726  |
| O  | -1.260651 | 0.249757  | -1.862202 |
| Ti | 2.129793  | -4.638627 | -1.949686 |
| O  | 2.174979  | -4.123588 | -0.055770 |
| O  | 3.230001  | -4.473520 | 2.776036  |
| Ti | 1.628974  | -4.355245 | 1.726847  |
| O  | 0.319258  | -5.692184 | 1.734978  |
| O  | 0.924602  | -6.047381 | -2.044684 |
| O  | 0.472553  | -3.412874 | -2.274971 |
| Ti | -0.497475 | -1.852943 | -1.420877 |
| O  | -0.403269 | -1.327071 | 0.476739  |
| O  | 0.665039  | -3.006329 | 2.614762  |
| Ti | -0.354341 | -1.463455 | 2.279167  |
| Ti | -2.771459 | 6.149461  | -4.000674 |
| O  | -2.993147 | 5.717482  | -5.844821 |
| O  | -3.982687 | 6.400156  | -8.563503 |
| Ti | -2.261532 | 6.104254  | -7.576787 |
| O  | -1.260424 | 7.708752  | -7.965043 |
| O  | -1.479366 | 7.540079  | -4.136173 |
| O  | -1.043900 | 4.972923  | -3.772882 |
| Ti | -0.309694 | 3.175580  | -4.121699 |
| O  | -0.262013 | 3.061377  | -6.006279 |
| O  | -1.487636 | 4.515716  | -8.358013 |
| Ti | -0.461966 | 2.881902  | -7.822869 |
| O  | 0.326497  | 0.868206  | -7.829706 |

|    |           |           |           |
|----|-----------|-----------|-----------|
| O  | 0.449390  | 1.131536  | -3.673511 |
| Ti | 0.153457  | 6.724406  | -4.718346 |
| O  | 1.001675  | 8.041833  | -5.902250 |
| Ti | 0.566909  | 7.260502  | -7.546824 |
| O  | -0.215147 | 5.792566  | -6.431742 |
| O  | 2.136041  | 6.192594  | -8.196039 |
| O  | 1.671226  | 6.237865  | -3.537119 |
| O  | 1.665391  | 3.417343  | -4.005564 |
| Ti | 3.056922  | 4.855310  | -4.144440 |
| O  | 2.903489  | 4.837305  | -6.026731 |
| O  | 1.548104  | 3.191692  | -8.214928 |
| Ti | 3.069493  | 4.475648  | -7.827815 |
| O  | 5.004927  | 4.834264  | -8.321780 |
| O  | 3.909008  | 2.397863  | -7.702505 |
| O  | 4.009902  | 2.579169  | -3.985895 |
| O  | 4.995904  | 5.115153  | -4.269004 |
| O  | 6.369164  | 3.308759  | -6.175094 |
| Ti | 5.741261  | 3.402326  | -4.334002 |
| O  | 6.905139  | 1.747301  | -3.942017 |
| Ti | 5.713807  | 2.989054  | -7.870919 |
| O  | 6.529275  | 1.218749  | -8.477075 |
| Ti | 6.334630  | -0.270164 | -7.289299 |
| Ti | 6.655019  | -0.123650 | -4.502755 |
| O  | 5.744182  | -1.904248 | -7.942005 |
| Ti | 3.964881  | -2.383515 | -7.418600 |
| O  | 4.240444  | -2.786359 | -5.632233 |
| O  | 5.837895  | -1.648126 | -3.553952 |
| Ti | 3.896567  | -2.202985 | -3.876998 |
| O  | 5.243910  | 0.225847  | -5.799194 |
| O  | 2.945176  | -3.561505 | -8.419261 |
| O  | 3.097473  | -0.706294 | -7.997371 |
| Ti | 2.270916  | 1.123793  | -7.699911 |
| O  | 7.734647  | -0.549266 | -6.000307 |
| O  | 2.271163  | 0.838444  | -5.850860 |
| O  | 3.155476  | -0.455758 | -3.564578 |
| Ti | 2.400894  | 1.352517  | -4.090974 |
| Ti | -8.104562 | 3.220208  | -4.910531 |
| Ti | -8.387241 | 3.110524  | -7.701794 |
| O  | -7.475968 | 4.852360  | -4.267528 |
| Ti | -5.666481 | 5.340753  | -4.608161 |
| O  | -5.704844 | 5.766137  | -6.412126 |
| O  | -7.427691 | 4.607067  | -8.310185 |
| Ti | -5.568821 | 5.151548  | -8.191404 |
| O  | -7.034704 | 2.596725  | -6.323969 |
| O  | -4.643952 | 6.586979  | -3.668086 |
| O  | -4.799657 | 3.719937  | -3.923544 |
| Ti | -3.975168 | 1.921689  | -4.249708 |
| O  | -9.494642 | 3.506092  | -6.194585 |
| O  | -4.038178 | 2.116160  | -6.112344 |
| O  | -4.800001 | 3.408370  | -8.456286 |
| Ti | -4.145013 | 1.574241  | -7.866292 |
| Ti | -7.427726 | 0.038583  | -4.336802 |

|    |           |           |            |
|----|-----------|-----------|------------|
| O  | -8.220946 | 1.809881  | -3.616544  |
| O  | -5.777232 | 0.425746  | -8.175652  |
| O  | -6.726771 | -2.097458 | -7.983621  |
| O  | -8.113508 | -0.269598 | -6.042441  |
| Ti | -7.509592 | -0.381904 | -7.879679  |
| O  | -8.692361 | 1.277349  | -8.381658  |
| O  | -5.629775 | 0.660429  | -4.382883  |
| Ti | -1.813836 | -3.766834 | -7.555599  |
| O  | -2.819875 | -5.004320 | -6.368138  |
| Ti | -2.389540 | -4.278941 | -4.721579  |
| O  | -1.347822 | -2.938871 | -5.738279  |
| O  | -3.717814 | -3.006771 | -4.020682  |
| O  | -3.416194 | -3.279802 | -8.643470  |
| O  | -3.363507 | -0.442304 | -8.039768  |
| Ti | -4.781546 | -1.895544 | -8.042037  |
| O  | -4.649900 | -1.716852 | -6.152542  |
| O  | -3.285972 | -0.131500 | -3.734978  |
| Ti | -4.763957 | -1.380742 | -4.346014  |
| O  | -6.719026 | -1.819525 | -3.975993  |
| O  | -2.036383 | 2.184335  | -4.088373  |
| O  | -2.182508 | 1.861037  | -8.254220  |
| Ti | 1.056890  | -3.134262 | -8.063743  |
| O  | 1.341225  | -2.747805 | -6.220128  |
| O  | 2.401434  | -3.495836 | -3.759173  |
| Ti | 0.488676  | -3.120897 | -4.505288  |
| O  | -0.579576 | -4.835955 | -4.094288  |
| O  | -0.171905 | -4.601709 | -8.029766  |
| O  | -0.716718 | -1.989622 | -8.142476  |
| Ti | -1.387672 | -0.200143 | -7.814843  |
| O  | -1.475552 | 0.022364  | -5.933996  |
| O  | -0.363413 | -1.569433 | -3.690726  |
| Ti | -1.278160 | 0.116146  | -4.102871  |
| Ti | -3.697123 | 7.654967  | -10.280372 |
| O  | -3.980215 | 7.268073  | -12.123966 |
| O  | -5.039848 | 8.014573  | -14.585612 |
| Ti | -3.127053 | 7.639994  | -13.838732 |
| O  | -2.058266 | 9.353776  | -14.249451 |
| O  | -2.467987 | 9.121580  | -10.313123 |
| O  | -1.925756 | 6.508392  | -10.198047 |
| Ti | -1.250667 | 4.719405  | -10.530520 |
| O  | -1.161696 | 4.498023  | -12.411779 |
| O  | -2.275086 | 6.088583  | -14.653630 |
| Ti | -1.361148 | 4.401879  | -14.242712 |
| O  | -0.603063 | 2.334130  | -14.256651 |
| O  | -0.456501 | 2.658126  | -10.091507 |
| Ti | -0.825380 | 8.285057  | -10.784568 |
| O  | 0.180962  | 9.521815  | -11.973333 |
| Ti | -0.249214 | 8.795705  | -13.620110 |
| O  | -1.291787 | 7.457543  | -12.602307 |
| O  | 1.078138  | 7.523486  | -14.322821 |
| O  | 0.781102  | 7.798728  | -9.702785  |
| O  | 0.724698  | 4.961894  | -10.304892 |

|    |            |           |            |
|----|------------|-----------|------------|
| Ti | 2.144474   | 6.414260  | -10.302742 |
| O  | 2.012876   | 6.231682  | -12.192567 |
| O  | 0.646785   | 4.649260  | -14.611491 |
| Ti | 2.123655   | 5.897827  | -13.999051 |
| O  | 4.080004   | 6.336877  | -14.369634 |
| O  | 2.990720   | 3.856772  | -13.962857 |
| O  | 3.138947   | 4.094040  | -10.168031 |
| O  | 4.089943   | 6.616818  | -10.362345 |
| O  | 5.474364   | 4.787151  | -12.303043 |
| Ti | 4.871514   | 4.900910  | -10.465363 |
| O  | 6.054444   | 3.241839  | -9.962653  |
| Ti | 4.788386   | 4.477475  | -14.008466 |
| O  | 5.580353   | 2.706982  | -14.728566 |
| Ti | 5.464366   | 1.295830  | -13.433413 |
| Ti | 5.749135   | 1.408231  | -10.642407 |
| O  | 4.835490   | -0.333928 | -14.072970 |
| Ti | 3.024970   | -0.822451 | -13.735382 |
| O  | 3.067912   | -1.247840 | -11.930962 |
| O  | 4.791193   | -0.089275 | -10.034420 |
| Ti | 2.931565   | -0.631221 | -10.152467 |
| O  | 4.395928   | 1.921787  | -12.019105 |
| O  | 2.005212   | -2.068976 | -14.677615 |
| O  | 2.160680   | 0.798448  | -14.422392 |
| Ti | 1.335926   | 2.596070  | -14.095633 |
| O  | 6.855870   | 1.012889  | -12.150021 |
| O  | 1.400107   | 2.403539  | -12.232639 |
| O  | 2.162798   | 1.112026  | -9.888492  |
| Ti | 1.506161   | 2.945655  | -10.478647 |
| Ti | -8.974806  | 4.787925  | -11.054987 |
| Ti | -9.294432  | 4.642499  | -13.841606 |
| O  | -8.382554  | 6.423078  | -10.401370 |
| Ti | -6.604529  | 6.902928  | -10.925374 |
| O  | -6.881501  | 7.304513  | -12.712046 |
| O  | -8.476453  | 6.166920  | -14.790701 |
| Ti | -6.535058  | 6.722044  | -14.467542 |
| O  | -7.883883  | 4.292779  | -12.544957 |
| O  | -5.585680  | 8.082473  | -9.925342  |
| O  | -5.735032  | 5.226851  | -10.346900 |
| Ti | -4.909605  | 3.396402  | -10.644398 |
| O  | -10.374295 | 5.068858  | -12.344327 |
| O  | -4.911656  | 3.680388  | -12.493754 |
| O  | -5.794918  | 4.974689  | -14.780179 |
| Ti | -5.040483  | 3.166295  | -14.253709 |
| Ti | -8.351581  | 1.531440  | -10.473107 |
| O  | -9.167987  | 3.300660  | -9.867570  |
| O  | -6.649791  | 1.940176  | -14.358869 |
| O  | -7.635908  | -0.595737 | -14.075736 |
| O  | -9.007528  | 1.211078  | -12.169432 |
| Ti | -8.380977  | 1.117503  | -14.010503 |
| O  | -9.545781  | 2.771810  | -14.402537 |
| O  | -6.547035  | 2.121228  | -10.641543 |
| Ti | -2.792719  | -2.204964 | -13.626617 |

|    |           |           |            |
|----|-----------|-----------|------------|
| O  | -3.639601 | -3.521631 | -12.440374 |
| Ti | -3.202112 | -2.740603 | -10.797541 |
| O  | -2.423032 | -1.271323 | -11.914775 |
| O  | -4.771829 | -1.672753 | -10.148149 |
| O  | -4.310292 | -1.718881 | -14.808160 |
| O  | -4.305167 | 1.101132  | -14.338170 |
| Ti | -5.697093 | -0.336486 | -14.200380 |
| O  | -5.542718 | -0.320224 | -12.318124 |
| O  | -4.186294 | 1.327372  | -10.130250 |
| Ti | -5.709612 | 0.043139  | -10.516999 |
| O  | -7.642665 | -0.315421 | -10.022885 |
| O  | -2.965089 | 3.650951  | -10.515972 |
| O  | -3.088411 | 3.387013  | -14.671736 |
| Ti | 0.132579  | -1.630129 | -14.346990 |
| O  | 0.357200  | -1.193182 | -12.503249 |
| O  | 1.342547  | -1.877573 | -9.779744  |
| Ti | -0.374148 | -1.582043 | -10.773061 |
| O  | -1.372955 | -3.186991 | -10.385904 |
| O  | -1.159418 | -3.019882 | -14.208389 |
| O  | -1.596964 | -0.453533 | -14.573463 |
| Ti | -2.330587 | 1.342715  | -14.223994 |
| O  | -2.376192 | 1.459455  | -12.339196 |
| O  | -1.150648 | 0.003248  | -9.987297  |
| Ti | -2.176819 | 1.639346  | -10.522629 |
| Ti | -4.767975 | 9.157527  | -16.395302 |
| O  | -4.813048 | 8.642387  | -18.288970 |
| O  | -5.868092 | 8.993021  | -21.120911 |
| Ti | -4.267212 | 8.873610  | -20.072317 |
| O  | -2.956896 | 10.210237 | -20.079741 |
| O  | -3.562210 | 10.565542 | -16.299368 |
| O  | -3.109187 | 7.931303  | -16.069333 |
| Ti | -2.142601 | 6.370618  | -16.923846 |
| O  | -2.236510 | 5.844598  | -18.821003 |
| O  | -3.304419 | 7.524413  | -20.959848 |
| Ti | -2.286244 | 5.980072  | -20.623677 |
| O  | -1.480393 | 4.054278  | -21.115306 |
| O  | -1.378624 | 4.268596  | -16.483009 |
| Ti | -1.813689 | 9.706226  | -16.372429 |
| O  | -1.115114 | 10.848905 | -17.795331 |
| Ti | -1.351599 | 9.692782  | -19.233178 |
| O  | -1.738630 | 8.270465  | -18.005986 |
| O  | -0.060747 | 9.207520  | -20.515296 |
| O  | 0.066524  | 9.417551  | -15.652350 |
| O  | -0.131155 | 6.478295  | -16.690278 |
| Ti | 1.235574  | 7.990534  | -16.466095 |
| O  | 1.209203  | 8.064796  | -18.348537 |
| O  | -0.309248 | 6.354925  | -20.906869 |
| Ti | 0.993982  | 7.662950  | -20.192689 |
| O  | 2.818291  | 7.630068  | -20.833280 |
| O  | 1.727769  | 5.576443  | -19.534940 |
| O  | 2.252503  | 5.633209  | -16.399194 |
| O  | 3.140743  | 8.215488  | -16.267577 |

|    |            |           |            |
|----|------------|-----------|------------|
| O  | 4.490656   | 6.687273  | -18.293111 |
| Ti | 3.951595   | 6.512822  | -16.477584 |
| O  | 5.107134   | 4.791668  | -16.077979 |
| Ti | 3.516706   | 6.207383  | -19.807054 |
| O  | 4.456764   | 4.750934  | -20.565925 |
| Ti | 4.314355   | 3.166675  | -19.564539 |
| Ti | 4.730747   | 2.965585  | -16.801049 |
| O  | 3.619785   | 1.698275  | -20.477368 |
| Ti | 1.756047   | 1.268175  | -20.316728 |
| O  | 1.790854   | 0.728085  | -18.512353 |
| O  | 3.831323   | 1.332856  | -16.439196 |
| Ti | 1.965411   | 0.931432  | -16.638097 |
| O  | 3.272295   | 3.617478  | -18.039853 |
| O  | 0.496709   | 0.098191  | -21.124938 |
| O  | 1.211623   | 2.932251  | -21.048662 |
| Ti | 0.280514   | 4.335711  | -20.256399 |
| O  | 5.746735   | 2.711955  | -18.382737 |
| O  | 0.042474   | 3.698235  | -18.548989 |
| O  | 1.210845   | 2.655087  | -16.271440 |
| Ti | 0.638876   | 4.503231  | -16.908403 |
| Ti | -9.574882  | 6.289837  | -16.762146 |
| Ti | -9.706063  | 5.947928  | -19.570722 |
| O  | -9.184345  | 8.140404  | -16.480506 |
| Ti | -7.519616  | 8.518153  | -17.221091 |
| O  | -7.639012  | 8.631593  | -19.057905 |
| O  | -9.127153  | 7.218607  | -20.784417 |
| Ti | -7.285352  | 7.831501  | -20.754155 |
| O  | -8.356651  | 5.675827  | -18.169707 |
| O  | -6.591411  | 9.806181  | -16.281804 |
| O  | -6.487382  | 6.918870  | -16.617441 |
| Ti | -5.856525  | 5.012678  | -17.002458 |
| O  | -10.872441 | 6.449698  | -18.171669 |
| O  | -5.547478  | 5.215272  | -18.859169 |
| O  | -6.567751  | 6.224238  | -21.403170 |
| Ti | -5.700495  | 4.741986  | -20.627002 |
| Ti | -9.239610  | 3.027724  | -16.523793 |
| O  | -10.218300 | 4.654300  | -15.877470 |
| O  | -7.349340  | 3.659250  | -20.256499 |
| O  | -8.441092  | 1.366178  | -20.907951 |
| O  | -9.808610  | 2.598650  | -18.253924 |
| Ti | -9.059299  | 2.881817  | -19.973554 |
| O  | -10.148351 | 4.348899  | -20.448857 |
| O  | -7.465539  | 3.701762  | -16.706755 |
| Ti | -4.305861  | -0.923109 | -19.753810 |
| O  | -4.820506  | -2.280513 | -18.479640 |
| Ti | -4.288736  | -1.260480 | -16.978537 |
| O  | -3.948981  | 0.202574  | -18.279937 |
| O  | -5.859528  | -0.186181 | -16.319135 |
| O  | -5.671668  | -0.161600 | -20.785079 |
| O  | -5.111755  | 2.659141  | -21.101497 |
| Ti | -6.544724  | 1.491447  | -20.466199 |
| O  | -6.712718  | 1.525749  | -18.572207 |

|    |           |           |            |
|----|-----------|-----------|------------|
| O  | -5.080249 | 2.897283  | -16.508281 |
| Ti | -6.606048 | 1.590421  | -16.725770 |
| O  | -8.535118 | 1.194601  | -16.135918 |
| O  | -3.877169 | 5.220068  | -16.837852 |
| O  | -3.858803 | 4.864884  | -21.320370 |
| Ti | -1.298684 | 0.051555  | -20.508888 |
| O  | -0.967488 | 0.226381  | -18.678406 |
| O  | 0.510659  | -0.427377 | -16.127191 |
| Ti | -1.308419 | -0.125574 | -16.854619 |
| O  | -2.429813 | -1.642094 | -16.763624 |
| O  | -2.674767 | -1.276533 | -20.606782 |
| O  | -2.268744 | 1.420195  | -21.325871 |
| Ti | -3.128564 | 2.973996  | -20.702809 |
| O  | -3.227165 | 2.936643  | -18.847838 |
| O  | -2.226891 | 1.513546  | -16.412272 |
| Ti | -3.074367 | 3.262844  | -16.984512 |

anatase-like 3-D (1,0,3)-mer

|    |           |           |           |
|----|-----------|-----------|-----------|
| Ti | -1.378960 | 4.450293  | 2.346041  |
| O  | -1.636610 | 4.152271  | 0.540048  |
| O  | -2.814448 | 4.701103  | -1.967490 |
| Ti | -0.972431 | 4.426483  | -1.224944 |
| O  | -0.233535 | 6.196511  | -1.653061 |
| O  | -0.056674 | 5.861764  | 2.327872  |
| O  | -0.284207 | 3.160202  | 3.121705  |
| Ti | 0.571705  | 1.625967  | 2.416701  |
| O  | 0.783871  | 1.624974  | 0.577373  |
| O  | -0.158009 | 2.842771  | -1.889500 |
| Ti | 0.594802  | 1.052458  | -1.258556 |
| O  | 1.435902  | -0.843808 | -1.419795 |
| O  | 1.238580  | -0.276332 | 3.060345  |
| Ti | 1.523730  | 5.506724  | 1.396860  |
| O  | 2.127519  | 6.865371  | 0.152650  |
| Ti | 1.641373  | 5.957672  | -1.425691 |
| O  | 1.034580  | 4.454327  | -0.131465 |
| O  | 3.104573  | 4.674377  | -1.923714 |
| O  | 2.894880  | 4.717211  | 2.378532  |
| O  | 2.538107  | 1.899627  | 2.904312  |
| Ti | 3.883413  | 3.099252  | 2.180893  |
| O  | 4.056159  | 3.085835  | 0.294684  |
| O  | 2.587340  | 1.489481  | -1.735253 |
| Ti | 3.972308  | 2.929013  | -1.551701 |
| O  | 5.927658  | 3.374909  | -2.055556 |
| O  | 4.955939  | 0.830455  | -1.483068 |
| O  | 4.703263  | 0.933168  | 1.909032  |
| O  | 5.755119  | 3.239380  | 2.680466  |
| O  | 7.246084  | 2.029093  | 0.068050  |
| Ti | 6.412957  | 1.740433  | 1.739500  |
| O  | 7.405768  | 0.227783  | 2.238982  |
| Ti | 6.693452  | 1.563893  | -1.662433 |
| O  | 7.593190  | -0.136622 | -2.269491 |
| Ti | 6.894350  | -1.802894 | -1.454625 |



|    |           |           |           |
|----|-----------|-----------|-----------|
| Ti | 6.872026  | -1.350975 | 1.358808  |
| O  | 6.616512  | -3.692369 | -1.614535 |
| Ti | 4.953840  | -4.132327 | -0.893709 |
| O  | 5.011821  | -4.160196 | 0.951898  |
| O  | 6.368876  | -2.612772 | 2.599018  |
| Ti | 4.543714  | -3.302199 | 2.597319  |
| O  | 5.536198  | -1.176228 | -0.115742 |
| O  | 4.054468  | -5.455879 | -1.808567 |
| O  | 3.900325  | -2.592296 | -1.593205 |
| Ti | 3.443742  | -0.598272 | -1.183207 |
| O  | 8.103488  | -1.854587 | 0.034490  |
| O  | 2.958377  | -0.777754 | 0.662570  |
| O  | 3.883915  | -1.658823 | 3.245789  |
| Ti | 3.090947  | -0.190502 | 2.386400  |
| Ti | -7.110725 | 1.533722  | 1.251172  |
| Ti | -7.314468 | 1.488367  | -1.599461 |
| O  | -6.330156 | 2.968875  | 2.142040  |
| Ti | -4.433224 | 3.270353  | 2.006888  |
| O  | -4.399959 | 3.791726  | 0.229500  |
| O  | -6.280885 | 3.017504  | -1.833408 |
| Ti | -4.388686 | 3.392919  | -1.637043 |
| O  | -5.993012 | 0.736191  | -0.129036 |
| O  | -3.178250 | 4.360383  | 2.942082  |
| O  | -3.932027 | 1.517407  | 2.522691  |
| Ti | -2.761026 | 0.323806  | 1.710702  |
| O  | -8.410773 | 1.893841  | -0.083079 |
| O  | -2.340918 | 1.017912  | 0.087169  |
| O  | -3.835102 | 1.592016  | -1.991447 |
| Ti | -3.123554 | -0.207060 | -1.329260 |
| Ti | -6.014072 | -1.185343 | 1.035628  |
| O  | -7.126392 | -0.053335 | 2.180833  |
| O  | -4.768244 | -1.326689 | -2.042977 |
| O  | -5.750814 | -3.850287 | -2.149672 |
| O  | -7.088912 | -2.058951 | -0.196294 |
| Ti | -6.511670 | -2.150458 | -2.016585 |
| O  | -7.584234 | -0.329373 | -2.348917 |
| O  | -4.028887 | -0.932647 | 0.536018  |
| Ti | -0.718535 | -5.308362 | -1.876344 |
| O  | -1.490700 | -6.367709 | -0.425844 |
| Ti | -1.311842 | -5.156346 | 0.973341  |
| O  | -0.792548 | -3.790782 | -0.257702 |
| O  | -2.610117 | -4.516775 | 2.170986  |
| O  | -2.614680 | -5.066398 | -2.621379 |
| O  | -2.329913 | -2.150846 | -1.654738 |
| Ti | -3.815540 | -3.584709 | -1.914219 |
| O  | -3.869537 | -3.717982 | -0.059382 |
| O  | -2.302198 | -1.664470 | 2.385561  |
| Ti | -3.612423 | -2.959510 | 1.679791  |
| O  | -5.330347 | -2.483436 | 2.275428  |
| O  | -1.103515 | 0.577876  | 2.747027  |
| O  | -1.103374 | 0.070458  | -1.829482 |
| Ti | 2.237757  | -4.757154 | -1.816803 |

|    |           |           |           |
|----|-----------|-----------|-----------|
| O  | 2.197150  | -4.189843 | 0.072149  |
| O  | 3.125439  | -4.444179 | 2.945399  |
| Ti | 1.559212  | -4.352808 | 1.827563  |
| O  | 0.256547  | -5.683372 | 1.898135  |
| O  | 1.023121  | -6.170761 | -1.869873 |
| O  | 0.560103  | -3.566377 | -2.242408 |
| Ti | -0.325500 | -1.975787 | -1.399765 |
| O  | -0.245159 | -1.271423 | 0.466874  |
| O  | 0.619125  | -2.955430 | 2.680883  |
| Ti | -0.287614 | -1.373119 | 2.271815  |
| Ti | -2.485767 | 6.015565  | -3.567224 |
| O  | -2.993764 | 5.312162  | -5.402466 |
| O  | -3.723109 | 6.221528  | -8.207900 |
| Ti | -2.192596 | 5.715986  | -7.110129 |
| O  | -1.502323 | 7.515491  | -7.910866 |
| O  | -1.363594 | 7.495141  | -4.026173 |
| O  | -0.718487 | 4.903068  | -3.715303 |
| Ti | -0.107870 | 3.064803  | -4.074088 |
| O  | -0.121119 | 3.044908  | -5.964454 |
| O  | -1.379532 | 4.408459  | -8.256560 |
| Ti | -0.359923 | 2.712207  | -7.769017 |
| O  | 0.355263  | 0.733013  | -7.675396 |
| O  | 0.639117  | 1.015903  | -3.614160 |
| Ti | 0.258592  | 6.740245  | -4.675376 |
| O  | 0.910931  | 8.063775  | -5.979100 |
| Ti | 0.426576  | 7.291387  | -7.618843 |
| O  | -0.257779 | 5.780365  | -6.330571 |
| O  | 1.904375  | 6.040532  | -8.154941 |
| O  | 1.835312  | 6.384545  | -3.497170 |
| O  | 1.873853  | 3.318581  | -3.991385 |
| Ti | 3.119650  | 4.850835  | -4.074188 |
| O  | 2.889434  | 5.004106  | -5.933611 |
| O  | 1.636630  | 3.056283  | -8.181269 |
| Ti | 3.027533  | 4.446963  | -7.701703 |
| O  | 4.980934  | 4.825380  | -8.126582 |
| O  | 3.906160  | 2.367976  | -7.527244 |
| O  | 4.143786  | 2.510549  | -3.852844 |
| O  | 5.033728  | 5.088822  | -4.136905 |
| O  | 6.442553  | 3.309548  | -6.014920 |
| Ti | 5.832390  | 3.374671  | -4.174677 |
| O  | 7.069667  | 1.791172  | -3.746368 |
| Ti | 5.693499  | 3.009326  | -7.671336 |
| O  | 6.320266  | 1.129022  | -8.273095 |
| Ti | 6.089791  | -0.312398 | -7.010143 |
| Ti | 6.686251  | -0.103172 | -4.281478 |
| O  | 5.388536  | -1.888012 | -7.562988 |
| Ti | 3.581699  | -2.611053 | -7.144272 |
| O  | 4.286916  | -3.020469 | -5.433698 |
| O  | 5.937011  | -1.733120 | -3.382368 |
| Ti | 4.005652  | -2.379514 | -3.719918 |
| O  | 5.177662  | 0.296784  | -5.416451 |
| O  | 2.852745  | -3.722312 | -8.464611 |

|    |           |           |           |
|----|-----------|-----------|-----------|
| O  | 2.896579  | -0.899377 | -7.879557 |
| Ti | 2.293454  | 1.009595  | -7.654056 |
| O  | 7.619785  | -0.572120 | -5.830492 |
| O  | 2.433231  | 0.744574  | -5.789095 |
| O  | 3.299660  | -0.611831 | -3.406092 |
| Ti | 2.596878  | 1.188709  | -4.019434 |
| Ti | -7.789589 | 3.111045  | -5.036343 |
| Ti | -8.232341 | 3.063374  | -7.809069 |
| O  | -6.950861 | 4.599718  | -4.392472 |
| Ti | -5.136807 | 5.299342  | -4.609729 |
| O  | -5.498107 | 5.876227  | -6.344705 |
| O  | -7.379267 | 4.710497  | -8.206347 |
| Ti | -5.536276 | 5.126749  | -8.086915 |
| O  | -6.869407 | 2.370430  | -6.524834 |
| O  | -4.333408 | 6.528291  | -3.403605 |
| O  | -4.487669 | 3.601655  | -3.753475 |
| Ti | -3.755707 | 1.777628  | -4.166582 |
| O  | -9.246264 | 3.456590  | -6.243714 |
| O  | -3.873041 | 2.056091  | -6.017459 |
| O  | -4.861148 | 3.286847  | -8.282548 |
| Ti | -4.095468 | 1.483343  | -7.762450 |
| Ti | -7.263569 | -0.025556 | -4.414125 |
| O  | -8.018577 | 1.760478  | -3.677778 |
| O  | -5.707879 | 0.339859  | -8.172888 |
| O  | -6.730950 | -2.130003 | -7.950145 |
| O  | -8.056343 | -0.288291 | -6.078778 |
| Ti | -7.462820 | -0.380752 | -7.924152 |
| O  | -8.669481 | 1.229735  | -8.527161 |
| O  | -5.441501 | 0.532515  | -4.465683 |
| Ti | -1.846725 | -3.942756 | -7.449095 |
| O  | -2.774672 | -5.200105 | -6.244115 |
| Ti | -2.266434 | -4.494706 | -4.608795 |
| O  | -1.179960 | -3.186504 | -5.634839 |
| O  | -3.560826 | -3.138424 | -4.016089 |
| O  | -3.422726 | -3.465349 | -8.568845 |
| O  | -3.351569 | -0.535134 | -7.911292 |
| Ti | -4.794078 | -1.977794 | -7.988062 |
| O  | -4.520347 | -1.977516 | -6.124064 |
| O  | -3.107724 | -0.274256 | -3.661610 |
| Ti | -4.594723 | -1.478273 | -4.342985 |
| O  | -6.605818 | -1.904186 | -4.074601 |
| O  | -1.831903 | 2.061521  | -3.986736 |
| O  | -2.117993 | 1.761533  | -8.147634 |
| Ti | 0.950942  | -3.306282 | -8.167062 |
| O  | 1.555778  | -2.945420 | -6.244020 |
| O  | 2.507771  | -3.702059 | -3.658033 |
| Ti | 0.627946  | -3.308077 | -4.491820 |
| O  | -0.441894 | -5.032395 | -4.000260 |
| O  | -0.238874 | -4.786987 | -8.043471 |
| O  | -0.785556 | -2.175510 | -7.891910 |
| Ti | -1.376538 | -0.345976 | -7.731553 |
| O  | -1.397562 | -0.085946 | -5.842522 |

|    |           |           |            |
|----|-----------|-----------|------------|
| O  | -0.102749 | -1.689015 | -3.694362  |
| Ti | -1.083756 | -0.019518 | -4.034140  |
| Ti | -3.022516 | 7.662435  | -9.594926  |
| O  | -3.672205 | 7.192359  | -11.732975 |
| O  | -4.605418 | 8.073108  | -14.678047 |
| Ti | -3.011726 | 7.667241  | -13.468818 |
| O  | -2.189553 | 9.358080  | -14.032038 |
| O  | -1.934492 | 9.155991  | -10.163150 |
| O  | -1.450192 | 6.512301  | -10.274677 |
| Ti | -1.033219 | 4.626725  | -10.382517 |
| O  | -1.398004 | 4.530058  | -12.255299 |
| O  | -2.435678 | 6.182999  | -14.593874 |
| Ti | -1.539156 | 4.474019  | -14.054873 |
| O  | -0.752688 | 2.486071  | -14.195440 |
| O  | -0.238426 | 2.554739  | -9.981897  |
| Ti | -0.453245 | 8.313223  | -10.977774 |
| O  | 0.265661  | 9.688054  | -12.188557 |
| Ti | -0.330017 | 8.998631  | -13.817481 |
| O  | -1.007082 | 7.430347  | -12.720556 |
| O  | 1.179665  | 7.786196  | -14.409726 |
| O  | 0.924955  | 7.865666  | -9.598543  |
| O  | 0.930716  | 4.789891  | -10.466086 |
| Ti | 2.230606  | 6.318806  | -10.231814 |
| O  | 1.968651  | 6.597121  | -12.096805 |
| O  | 0.510254  | 4.805095  | -14.406428 |
| Ti | 2.012516  | 6.065101  | -13.874913 |
| O  | 3.984548  | 6.413675  | -14.361381 |
| O  | 2.828235  | 4.024065  | -13.753530 |
| O  | 3.187862  | 4.145689  | -9.976326  |
| O  | 4.157671  | 6.567109  | -10.253585 |
| O  | 5.423933  | 4.782256  | -12.196296 |
| Ti | 4.958713  | 4.841550  | -10.322029 |
| O  | 6.100548  | 3.224833  | -9.727102  |
| Ti | 4.651962  | 4.603721  | -13.895909 |
| O  | 5.131269  | 2.704033  | -14.449434 |
| Ti | 4.713023  | 1.463607  | -13.013616 |
| Ti | 5.504401  | 1.351927  | -10.306317 |
| O  | 3.890508  | -0.052702 | -13.485799 |
| Ti | 2.099796  | -1.018864 | -13.434267 |
| O  | 2.762518  | -1.661115 | -11.757136 |
| O  | 4.669970  | -0.289214 | -9.893827  |
| Ti | 2.853478  | -0.946347 | -10.034637 |
| O  | 3.915559  | 2.136935  | -11.310166 |
| O  | 1.409457  | -2.131459 | -14.784781 |
| O  | 1.717123  | 0.770195  | -14.353574 |
| Ti | 1.156225  | 2.703119  | -14.044833 |
| O  | 6.302073  | 1.099862  | -11.974810 |
| O  | 1.388868  | 2.300797  | -12.240571 |
| O  | 2.127370  | 0.850848  | -9.805671  |
| Ti | 1.791912  | 2.736821  | -10.488692 |
| Ti | -8.230950 | 4.560476  | -11.447217 |
| Ti | -9.022167 | 4.672480  | -14.154291 |

|    |           |           |            |
|----|-----------|-----------|------------|
| O  | -7.407717 | 6.077147  | -10.974235 |
| Ti | -5.617741 | 7.044012  | -11.025489 |
| O  | -6.281220 | 7.686080  | -12.702627 |
| O  | -8.188168 | 6.314049  | -14.567220 |
| Ti | -6.371599 | 6.972045  | -14.425193 |
| O  | -7.432211 | 3.888157  | -13.150699 |
| O  | -4.927803 | 8.156823  | -9.674874  |
| O  | -5.234533 | 5.254789  | -10.106308 |
| Ti | -4.675667 | 3.321321  | -10.414655 |
| O  | -9.819300 | 4.924122  | -12.485603 |
| O  | -4.906569 | 3.722482  | -12.219105 |
| O  | -5.645628 | 5.174669  | -14.653761 |
| Ti | -5.311928 | 3.287714  | -13.970939 |
| Ti | -8.171093 | 1.419584  | -10.564762 |
| O  | -8.648946 | 3.319932  | -10.011266 |
| O  | -6.707717 | 1.877646  | -14.483120 |
| O  | -7.677158 | -0.544401 | -14.207514 |
| O  | -8.942766 | 1.241627  | -12.263504 |
| Ti | -8.478519 | 1.181035  | -14.138911 |
| O  | -9.618283 | 2.799478  | -14.732715 |
| O  | -6.347026 | 1.999843  | -10.705966 |
| Ti | -3.065315 | -2.287540 | -13.481818 |
| O  | -3.783206 | -3.662917 | -12.271019 |
| Ti | -3.187572 | -2.973696 | -10.642151 |
| O  | -2.511518 | -1.404751 | -11.738954 |
| O  | -4.698347 | -1.762148 | -10.050031 |
| O  | -4.443023 | -1.840552 | -14.862359 |
| O  | -4.450447 | 1.234524  | -13.992873 |
| Ti | -5.750127 | -0.294875 | -14.228044 |
| O  | -5.488182 | -0.574114 | -12.363336 |
| O  | -4.029870 | 1.219056  | -10.052741 |
| Ti | -5.531636 | -0.041614 | -10.585115 |
| O  | -7.503828 | -0.389819 | -10.098859 |
| O  | -2.766477 | 3.538235  | -10.264008 |
| O  | -3.281424 | 3.469934  | -14.477402 |
| Ti | -0.495741 | -1.636839 | -14.864182 |
| O  | 0.153873  | -1.165650 | -12.726653 |
| O  | 1.086755  | -2.046763 | -9.781540  |
| Ti | -0.506517 | -1.641359 | -10.991359 |
| O  | -1.327585 | -3.332788 | -10.429508 |
| O  | -1.583480 | -3.130360 | -14.296102 |
| O  | -2.068956 | -0.486925 | -14.185406 |
| Ti | -2.486102 | 1.398222  | -14.077064 |
| O  | -2.120783 | 1.495953  | -12.204180 |
| O  | -1.083850 | -0.158370 | -9.865130  |
| Ti | -1.980740 | 1.550541  | -10.404385 |
| Ti | -4.469506 | 9.331740  | -16.292572 |
| O  | -5.073472 | 8.971179  | -18.215917 |
| O  | -6.025065 | 9.727005  | -20.801638 |
| Ti | -4.145483 | 9.333005  | -19.967636 |
| O  | -3.075159 | 11.057034 | -20.458919 |
| O  | -3.278693 | 10.812721 | -16.416084 |

|    |            |           |            |
|----|------------|-----------|------------|
| O  | -2.732505  | 8.200348  | -16.567750 |
| Ti | -2.143346  | 6.371194  | -16.727678 |
| O  | -2.117315  | 6.110400  | -18.616587 |
| O  | -3.415158  | 7.713652  | -20.764954 |
| Ti | -2.435151  | 6.043675  | -20.425542 |
| O  | -1.686867  | 3.962689  | -20.472163 |
| O  | -1.401878  | 4.263075  | -16.312013 |
| Ti | -1.671310  | 9.967317  | -17.010086 |
| O  | -0.742520  | 11.224607 | -18.215219 |
| Ti | -1.250557  | 10.519262 | -19.850300 |
| O  | -2.337264  | 9.211246  | -18.824421 |
| O  | 0.043475   | 9.162691  | -20.443055 |
| O  | -0.094414  | 9.489934  | -15.891239 |
| O  | -0.168165  | 6.559498  | -16.547805 |
| Ti | 1.275733   | 8.001822  | -16.471435 |
| O  | 1.001708   | 7.999137  | -18.335847 |
| O  | -0.410924  | 6.298036  | -20.797941 |
| Ti | 1.076644   | 7.502001  | -20.116902 |
| O  | 3.087366   | 7.927905  | -20.385319 |
| O  | 1.923122   | 5.490868  | -19.994050 |
| O  | 2.188710   | 5.684239  | -16.287062 |
| O  | 3.212077   | 8.154194  | -16.509971 |
| O  | 4.537389   | 6.311998  | -18.381041 |
| Ti | 3.943690   | 6.405017  | -16.535687 |
| O  | 5.150225   | 4.794374  | -15.933224 |
| Ti | 3.744982   | 6.049678  | -20.045623 |
| O  | 4.500352   | 4.263316  | -20.783323 |
| Ti | 4.271803   | 2.912436  | -19.424109 |
| Ti | 4.714579   | 2.961142  | -16.651558 |
| O  | 3.433060   | 1.422762  | -20.068470 |
| Ti | 1.619106   | 0.725483  | -19.849908 |
| O  | 1.980527   | 0.148534  | -18.114924 |
| O  | 3.861408   | 1.313456  | -16.253151 |
| Ti | 2.018203   | 0.898757  | -16.372935 |
| O  | 3.351107   | 3.652241  | -17.935963 |
| O  | 0.815426   | -0.503558 | -21.055539 |
| O  | 0.969820   | 2.422795  | -20.706169 |
| Ti | 0.237551   | 4.246149  | -20.292684 |
| O  | 5.728452   | 2.567398  | -18.217006 |
| O  | 0.352741   | 3.967722  | -18.441699 |
| O  | 1.342711   | 2.738395  | -16.176862 |
| Ti | 0.575675   | 4.541408  | -16.697015 |
| Ti | -9.608194  | 6.337562  | -17.449033 |
| Ti | -10.204470 | 6.128994  | -20.177628 |
| O  | -8.906555  | 7.913406  | -16.896400 |
| Ti | -7.100172  | 8.636412  | -17.315451 |
| O  | -7.804798  | 9.045648  | -19.025855 |
| O  | -9.454896  | 7.757997  | -21.077193 |
| Ti | -7.523226  | 8.404587  | -20.739639 |
| O  | -8.696673  | 5.728355  | -19.042572 |
| O  | -6.371136  | 9.748158  | -15.995498 |
| O  | -6.414660  | 6.925002  | -16.580465 |

|    |            |           |            |
|----|------------|-----------|------------|
| Ti | -5.813647  | 5.015235  | -16.804970 |
| O  | -11.138536 | 6.598056  | -18.628732 |
| O  | -5.953380  | 5.278469  | -18.670002 |
| O  | -6.817937  | 6.636908  | -21.052956 |
| Ti | -6.115677  | 4.835730  | -20.439957 |
| Ti | -9.212695  | 3.015383  | -16.788562 |
| O  | -9.839836  | 4.895479  | -16.186772 |
| O  | -7.662686  | 3.514324  | -20.607076 |
| O  | -8.552882  | 0.936416  | -20.322901 |
| O  | -9.961716  | 2.715006  | -18.445228 |
| Ti | -9.351371  | 2.650492  | -20.285258 |
| O  | -10.588414 | 4.234715  | -20.713018 |
| O  | -7.425545  | 3.656285  | -16.931855 |
| Ti | -3.776783  | -0.715038 | -19.784548 |
| O  | -4.428680  | -2.038552 | -18.480797 |
| Ti | -3.944624  | -1.266101 | -16.841003 |
| O  | -3.260441  | 0.245194  | -18.129288 |
| O  | -5.423146  | -0.015429 | -16.304973 |
| O  | -5.353570  | -0.359213 | -20.962673 |
| O  | -5.393046  | 2.705758  | -20.469061 |
| Ti | -6.638658  | 1.173790  | -20.385379 |
| O  | -6.408931  | 1.020066  | -18.525999 |
| O  | -5.156729  | 2.968356  | -16.277224 |
| Ti | -6.546893  | 1.577351  | -16.757972 |
| O  | -8.500612  | 1.198488  | -16.333823 |
| O  | -3.874702  | 5.291821  | -16.783658 |
| O  | -4.157426  | 5.008794  | -20.845138 |
| Ti | -1.032523  | 0.009772  | -20.892242 |
| O  | -0.523976  | 0.712913  | -19.056819 |
| O  | 0.204458   | -0.195415 | -16.251415 |
| Ti | -1.325847  | 0.309916  | -17.349246 |
| O  | -2.015454  | -1.490236 | -16.549039 |
| O  | -2.154398  | -1.469901 | -20.433706 |
| O  | -2.798017  | 1.121736  | -20.744249 |
| Ti | -3.409575  | 2.959511  | -20.385069 |
| O  | -3.396242  | 2.979482  | -18.494446 |
| O  | -2.140279  | 1.616748  | -16.202831 |
| Ti | -3.160400  | 3.313324  | -16.690345 |
| Ti | -5.755181  | 10.782115 | -22.642500 |
| O  | -5.714817  | 10.215510 | -24.531228 |
| O  | -6.643974  | 10.470029 | -27.403853 |
| Ti | -5.077325  | 10.377857 | -26.287146 |
| O  | -3.774132  | 11.708386 | -26.357528 |
| O  | -4.539705  | 12.196757 | -22.589373 |
| O  | -4.077857  | 9.591596  | -22.217059 |
| Ti | -3.192847  | 8.000131  | -23.059680 |
| O  | -3.272524  | 7.296407  | -24.926318 |
| O  | -4.138324  | 8.980423  | -27.140475 |
| Ti | -3.231920  | 7.397687  | -26.731288 |
| O  | -2.416102  | 5.447018  | -27.206528 |
| O  | -2.414520  | 5.954019  | -22.630145 |
| Ti | -2.798362  | 11.332388 | -22.582947 |

|    |            |           |            |
|----|------------|-----------|------------|
| O  | -2.026764  | 12.392313 | -24.033361 |
| Ti | -2.205834  | 11.181193 | -25.432571 |
| O  | -2.724964  | 9.815652  | -24.201708 |
| O  | -0.908018  | 10.541755 | -26.630742 |
| O  | -0.902314  | 11.090974 | -21.838105 |
| O  | -1.188458  | 8.174838  | -22.804280 |
| Ti | 0.296618   | 9.608755  | -22.545085 |
| O  | 0.350678   | 9.741364  | -24.400058 |
| O  | -1.217156  | 7.689154  | -26.845228 |
| Ti | 0.093448   | 8.983806  | -26.139463 |
| O  | 1.810812   | 8.507624  | -26.735075 |
| O  | 0.509765   | 6.956718  | -24.995057 |
| O  | 1.249711   | 7.350675  | -22.416915 |
| O  | 2.233120   | 9.874415  | -22.310512 |
| O  | 3.570372   | 8.082753  | -24.263730 |
| Ti | 2.993543   | 8.174318  | -22.443233 |
| O  | 4.066048   | 6.353487  | -22.111150 |
| Ti | 2.494727   | 7.209416  | -25.495463 |
| O  | 3.606653   | 6.077637  | -26.640799 |
| Ti | 3.591404   | 4.490616  | -25.711446 |
| Ti | 3.795853   | 4.535773  | -22.860670 |
| O  | 2.811077   | 3.055476  | -26.602029 |
| Ti | 0.914074   | 2.754522  | -26.466925 |
| O  | 0.880888   | 2.232092  | -24.689317 |
| O  | 2.762590   | 3.006566  | -22.626427 |
| Ti | 0.870561   | 2.631430  | -22.822599 |
| O  | 2.474094   | 5.287968  | -24.331001 |
| O  | -0.340646  | 1.664708  | -27.401891 |
| O  | 0.412924   | 4.507179  | -26.982291 |
| Ti | -0.758559  | 5.700442  | -26.170414 |
| O  | 4.891707   | 4.130376  | -24.376644 |
| O  | -1.178370  | 5.006594  | -24.546984 |
| O  | 0.316316   | 4.432216  | -22.468257 |
| Ti | -0.395283  | 6.231033  | -23.130493 |
| Ti | -10.413033 | 7.828691  | -23.004560 |
| Ti | -10.391603 | 7.377470  | -25.818010 |
| O  | -10.134566 | 9.718062  | -22.843782 |
| Ti | -8.471664  | 10.157574 | -23.565115 |
| O  | -8.530254  | 10.186026 | -25.410514 |
| O  | -9.887924  | 8.638993  | -27.058358 |
| Ti | -8.062598  | 9.328311  | -27.056061 |
| O  | -9.055860  | 7.201591  | -24.343880 |
| O  | -7.571949  | 11.481238 | -22.649728 |
| O  | -7.418597  | 8.616762  | -22.866601 |
| Ti | -6.962260  | 6.623021  | -23.275905 |
| O  | -11.622553 | 7.881552  | -24.493365 |
| O  | -6.477765  | 6.801721  | -25.121836 |
| O  | -7.402858  | 7.685026  | -27.704077 |
| Ti | -6.610430  | 6.215438  | -26.845877 |
| Ti | -10.212438 | 4.461923  | -22.796769 |
| O  | -11.112411 | 6.162598  | -22.189948 |
| O  | -8.223202  | 5.092594  | -26.369397 |



|    |            |           |            |
|----|------------|-----------|------------|
| O  | -9.276563  | 2.786305  | -27.140222 |
| O  | -10.765325 | 3.997525  | -24.527382 |
| Ti | -9.933045  | 4.285956  | -26.199221 |
| O  | -10.925962 | 5.798736  | -26.698293 |
| O  | -8.474554  | 5.194926  | -22.976040 |
| Ti | -5.043233  | 0.519469  | -25.856580 |
| O  | -5.646434  | -0.839521 | -24.612573 |
| Ti | -5.160077  | 0.068583  | -23.034161 |
| O  | -4.553431  | 1.571559  | -24.328415 |
| O  | -6.624173  | 1.350482  | -22.536185 |
| O  | -6.414545  | 1.308465  | -26.837862 |
| O  | -6.057876  | 4.125597  | -27.363662 |
| Ti | -7.403102  | 2.925961  | -26.640309 |
| O  | -7.576167  | 2.939289  | -24.754403 |
| O  | -6.106024  | 4.534916  | -22.724204 |
| Ti | -7.491553  | 3.096002  | -22.907944 |
| O  | -9.447095  | 2.650712  | -22.404392 |
| O  | -4.954354  | 6.868663  | -23.039192 |
| O  | -4.757995  | 6.301265  | -27.519944 |
| Ti | -2.140341  | 1.575302  | -26.805171 |
| O  | -1.882277  | 1.873806  | -24.999841 |
| O  | -0.703479  | 1.323462  | -22.492174 |
| Ti | -2.545751  | 1.598821  | -23.234722 |
| O  | -3.285169  | -0.171331 | -22.807238 |
| O  | -3.462508  | 0.163769  | -26.787733 |
| O  | -3.235401  | 2.865042  | -27.582097 |
| Ti | -4.091592  | 4.398582  | -26.876342 |
| O  | -4.303100  | 4.400059  | -25.037056 |
| O  | -3.360846  | 3.181957  | -22.569622 |
| Ti | -4.113810  | 4.970654  | -23.201054 |

anatase-like 3-D (1,0,4)-mer

|    |           |           |           |
|----|-----------|-----------|-----------|
| Ti | -1.363398 | 4.410937  | 2.429374  |
| O  | -1.649990 | 4.275552  | 0.611147  |
| O  | -2.890238 | 4.827403  | -1.847423 |
| Ti | -1.018224 | 4.547290  | -1.168895 |
| O  | -0.179929 | 6.271586  | -1.562627 |
| O  | 0.005395  | 5.785157  | 2.461720  |
| O  | -0.298571 | 3.075019  | 3.174490  |
| Ti | 0.583657  | 1.541149  | 2.512387  |
| O  | 0.738786  | 1.579011  | 0.667765  |
| O  | -0.307499 | 2.884966  | -1.785941 |
| Ti | 0.433926  | 1.124199  | -1.171965 |
| O  | 1.278240  | -0.811745 | -1.380584 |
| O  | 1.288883  | -0.368346 | 3.092020  |
| Ti | 1.561313  | 5.434815  | 1.498095  |
| O  | 2.194210  | 6.806547  | 0.279030  |
| Ti | 1.679164  | 5.941790  | -1.313513 |
| O  | 1.019298  | 4.448362  | -0.065020 |
| O  | 3.140360  | 4.666551  | -1.821104 |
| O  | 2.927663  | 4.624544  | 2.470363  |
| O  | 2.550491  | 1.831514  | 2.967285  |

|    |           |           |           |
|----|-----------|-----------|-----------|
| Ti | 3.936351  | 3.014076  | 2.272626  |
| O  | 4.041326  | 2.993196  | 0.389573  |
| O  | 2.457896  | 1.551136  | -1.648958 |
| Ti | 3.945571  | 2.896070  | -1.454547 |
| O  | 5.915057  | 3.262891  | -1.925464 |
| O  | 4.850557  | 0.739026  | -1.413672 |
| O  | 4.771761  | 0.865295  | 2.098283  |
| O  | 5.816652  | 3.186071  | 2.749081  |
| O  | 7.219151  | 1.845640  | 0.205678  |
| Ti | 6.489581  | 1.622365  | 1.931943  |
| O  | 7.590573  | 0.262325  | 2.668476  |
| Ti | 6.599109  | 1.414424  | -1.519408 |
| O  | 7.637709  | -0.272006 | -2.077646 |
| Ti | 7.359793  | -1.746145 | -0.908571 |
| Ti | 7.282839  | -1.411560 | 1.877457  |
| O  | 6.860187  | -3.466213 | -1.421121 |
| Ti | 5.073311  | -3.864380 | -0.899600 |
| O  | 5.095461  | -3.955067 | 0.953206  |
| O  | 6.564547  | -2.722187 | 2.962339  |
| Ti | 4.708511  | -3.281662 | 2.680187  |
| O  | 6.071080  | -1.136033 | 0.390077  |
| O  | 4.174337  | -5.204175 | -1.778906 |
| O  | 4.086825  | -2.314593 | -1.550622 |
| Ti | 3.204355  | -0.527035 | -1.224333 |
| O  | 8.574901  | -1.898074 | 0.554692  |
| O  | 3.025000  | -0.744596 | 0.656224  |
| O  | 3.973985  | -1.676137 | 3.300951  |
| Ti | 3.133090  | -0.245458 | 2.421706  |
| Ti | -7.075025 | 1.430344  | 1.364813  |
| Ti | -7.322187 | 1.429998  | -1.484716 |
| O  | -6.304669 | 2.866603  | 2.267025  |
| Ti | -4.412758 | 3.174036  | 2.132826  |
| O  | -4.381225 | 3.725636  | 0.362864  |
| O  | -6.285080 | 2.967454  | -1.691454 |
| Ti | -4.401077 | 3.407855  | -1.520498 |
| O  | -5.976567 | 0.646012  | -0.022646 |
| O  | -3.149098 | 4.265566  | 3.053177  |
| O  | -3.908197 | 1.427109  | 2.679509  |
| Ti | -2.749971 | 0.227966  | 1.858842  |
| O  | -8.391933 | 1.817343  | 0.056325  |
| O  | -2.350852 | 0.968588  | 0.249706  |
| O  | -3.840010 | 1.606245  | -1.861452 |
| Ti | -3.210548 | -0.203895 | -1.187651 |
| Ti | -6.000865 | -1.303354 | 1.170702  |
| O  | -7.087987 | -0.154526 | 2.309581  |
| O  | -4.835932 | -1.341094 | -1.906659 |
| O  | -5.757957 | -3.916633 | -2.037768 |
| O  | -7.101310 | -2.171596 | -0.043652 |
| Ti | -6.536182 | -2.226158 | -1.866765 |
| O  | -7.660323 | -0.420057 | -2.168460 |
| O  | -4.025494 | -1.002958 | 0.677994  |
| Ti | -0.700471 | -5.325770 | -1.873633 |

|    |           |           |           |
|----|-----------|-----------|-----------|
| O  | -1.397390 | -6.426979 | -0.420735 |
| Ti | -1.221913 | -5.230744 | 1.000984  |
| O  | -0.821527 | -3.833302 | -0.230575 |
| O  | -2.534559 | -4.633874 | 2.200636  |
| O  | -2.574032 | -5.045702 | -2.622656 |
| O  | -2.423773 | -2.159884 | -1.580515 |
| Ti | -3.820081 | -3.660283 | -1.868309 |
| O  | -3.857187 | -3.797032 | -0.001404 |
| O  | -2.277415 | -1.778457 | 2.480446  |
| Ti | -3.571831 | -3.080236 | 1.739893  |
| O  | -5.291788 | -2.626140 | 2.364825  |
| O  | -1.071610 | 0.461331  | 2.877038  |
| O  | -1.208007 | 0.063817  | -1.729699 |
| Ti | 2.268908  | -4.719392 | -1.751190 |
| O  | 2.236847  | -4.147486 | 0.118698  |
| O  | 3.282623  | -4.451554 | 2.961423  |
| Ti | 1.679208  | -4.362838 | 1.898537  |
| O  | 0.376057  | -5.703866 | 1.906065  |
| O  | 1.089342  | -6.145798 | -1.864976 |
| O  | 0.571184  | -3.548872 | -2.160107 |
| Ti | -0.437847 | -2.006962 | -1.339057 |
| O  | -0.262335 | -1.373811 | 0.549737  |
| O  | 0.698331  | -3.018288 | 2.777044  |
| Ti | -0.266555 | -1.468725 | 2.351512  |
| Ti | -2.560209 | 6.044134  | -3.503725 |
| O  | -3.002158 | 5.253253  | -5.353416 |
| O  | -3.679849 | 6.153340  | -8.164199 |
| Ti | -2.146137 | 5.662438  | -7.049482 |
| O  | -1.475524 | 7.464910  | -7.845068 |
| O  | -1.410737 | 7.492147  | -3.958954 |
| O  | -0.800796 | 4.926809  | -3.572024 |
| Ti | -0.235745 | 3.076293  | -3.991181 |
| O  | -0.157405 | 3.110983  | -5.874957 |
| O  | -1.311348 | 4.389915  | -8.198409 |
| Ti | -0.298284 | 2.675984  | -7.672798 |
| O  | 0.404838  | 0.713123  | -7.591199 |
| O  | 0.505188  | 1.054064  | -3.498135 |
| Ti | 0.244564  | 6.736059  | -4.559457 |
| O  | 0.913139  | 8.039269  | -5.878140 |
| Ti | 0.460374  | 7.260440  | -7.528118 |
| O  | -0.250646 | 5.765109  | -6.209842 |
| O  | 1.936638  | 6.026895  | -8.059831 |
| O  | 1.834440  | 6.355276  | -3.414090 |
| O  | 1.763699  | 3.367763  | -3.855720 |
| Ti | 3.111854  | 4.809036  | -3.977533 |
| O  | 2.937980  | 4.941323  | -5.843291 |
| O  | 1.693303  | 3.025764  | -8.091521 |
| Ti | 3.078037  | 4.427093  | -7.624302 |
| O  | 5.039095  | 4.811167  | -8.013037 |
| O  | 3.979067  | 2.330457  | -7.479272 |
| O  | 4.082209  | 2.483388  | -3.741373 |
| O  | 5.043923  | 5.005582  | -4.013787 |

|    |           |           |           |
|----|-----------|-----------|-----------|
| O  | 6.462319  | 3.255103  | -5.878681 |
| Ti | 5.818113  | 3.285494  | -4.053405 |
| O  | 7.007056  | 1.655570  | -3.578970 |
| Ti | 5.755815  | 2.970884  | -7.567763 |
| O  | 6.548867  | 1.158438  | -8.206402 |
| Ti | 6.397911  | -0.317152 | -6.979413 |
| Ti | 6.736190  | -0.221268 | -4.199628 |
| O  | 5.833565  | -1.958621 | -7.633904 |
| Ti | 4.045254  | -2.512571 | -7.224128 |
| O  | 4.281584  | -2.990778 | -5.462611 |
| O  | 5.849787  | -1.718212 | -3.496973 |
| Ti | 3.976940  | -2.278052 | -3.734141 |
| O  | 5.343392  | 0.254480  | -5.522060 |
| O  | 3.070948  | -3.518506 | -8.455969 |
| O  | 3.136736  | -0.846660 | -7.689070 |
| Ti | 2.367180  | 0.977844  | -7.590093 |
| O  | 7.817070  | -0.604098 | -5.719003 |
| O  | 2.336465  | 0.895922  | -5.698598 |
| O  | 3.131996  | -0.558149 | -3.437807 |
| Ti | 2.453834  | 1.272325  | -3.930186 |
| Ti | -7.797390 | 2.806595  | -5.095163 |
| Ti | -8.423391 | 3.013962  | -7.862658 |
| O  | -6.773047 | 4.214203  | -4.617958 |
| Ti | -5.089085 | 5.249138  | -4.663219 |
| O  | -5.536233 | 5.905069  | -6.345055 |
| O  | -7.310044 | 4.493262  | -8.121727 |
| Ti | -5.479226 | 5.046362  | -8.042752 |
| O  | -7.154247 | 1.872383  | -6.705454 |
| O  | -4.408686 | 6.553888  | -3.454440 |
| O  | -4.459331 | 3.632883  | -3.607721 |
| Ti | -3.882049 | 1.754801  | -4.054146 |
| O  | -9.268348 | 3.385434  | -6.209257 |
| O  | -4.119473 | 1.965196  | -5.909543 |
| O  | -4.727421 | 3.268512  | -8.186535 |
| Ti | -4.035148 | 1.420723  | -7.681356 |
| Ti | -7.358497 | -0.183661 | -4.215571 |
| O  | -8.053234 | 1.698440  | -3.542884 |
| O  | -5.671161 | 0.382254  | -8.212163 |
| O  | -6.802337 | -1.917080 | -7.727825 |
| O  | -8.189596 | -0.325469 | -5.853148 |
| Ti | -7.527510 | -0.121118 | -7.720052 |
| O  | -8.911197 | 1.203879  | -8.595437 |
| O  | -5.579333 | 0.520704  | -4.241291 |
| Ti | -1.757095 | -3.874287 | -7.580134 |
| O  | -2.673532 | -5.155226 | -6.321936 |
| Ti | -2.262880 | -4.434849 | -4.683231 |
| O  | -1.217674 | -3.113016 | -5.616438 |
| O  | -3.664958 | -3.201074 | -3.982816 |
| O  | -3.601740 | -3.431394 | -8.355839 |
| O  | -3.285003 | -0.572240 | -7.885658 |
| Ti | -4.894047 | -1.894288 | -7.875019 |
| O  | -4.546189 | -1.690805 | -6.007392 |

|    |           |           |            |
|----|-----------|-----------|------------|
| O  | -3.188985 | -0.272938 | -3.525859  |
| Ti | -4.644786 | -1.510032 | -4.202540  |
| O  | -6.653725 | -2.023384 | -3.931158  |
| O  | -1.947754 | 2.082164  | -3.947838  |
| O  | -2.082245 | 1.773957  | -8.021056  |
| Ti | 1.139250  | -3.334241 | -7.925907  |
| O  | 1.551454  | -3.064069 | -6.071848  |
| O  | 2.533382  | -3.611851 | -3.530080  |
| Ti | 0.594981  | -3.305619 | -4.394410  |
| O  | -0.451222 | -5.021387 | -3.981816  |
| O  | -0.069762 | -4.775080 | -7.970514  |
| O  | -0.581748 | -2.114844 | -7.757296  |
| Ti | -1.330658 | -0.363297 | -7.616694  |
| O  | -1.463922 | 0.006524  | -5.748050  |
| O  | -0.236688 | -1.706929 | -3.608590  |
| Ti | -1.188004 | -0.024738 | -3.937330  |
| Ti | -2.973815 | 7.590481  | -9.535285  |
| O  | -3.639048 | 6.971057  | -11.591675 |
| O  | -4.487295 | 7.963139  | -14.442779 |
| Ti | -2.954391 | 7.417972  | -13.310992 |
| O  | -2.289727 | 9.237158  | -14.173758 |
| O  | -1.921364 | 9.122516  | -10.121013 |
| O  | -1.348321 | 6.506660  | -10.234927 |
| Ti | -0.991313 | 4.598919  | -10.325912 |
| O  | -1.232807 | 4.538568  | -12.214456 |
| O  | -2.295245 | 6.077129  | -14.523065 |
| Ti | -1.421829 | 4.308424  | -14.007341 |
| O  | -0.706988 | 2.327816  | -14.047592 |
| O  | -0.197524 | 2.527987  | -9.888492  |
| Ti | -0.411562 | 8.338575  | -10.931017 |
| O  | 0.187697  | 9.716073  | -12.234656 |
| Ti | -0.368259 | 9.004571  | -13.872742 |
| O  | -1.016365 | 7.468247  | -12.667784 |
| O  | 1.090967  | 7.710403  | -14.372937 |
| O  | 0.931475  | 7.866870  | -9.516597  |
| O  | 0.988709  | 4.736379  | -10.377485 |
| Ti | 2.219813  | 6.293634  | -10.161506 |
| O  | 1.946879  | 6.638111  | -12.015999 |
| O  | 0.618296  | 4.662925  | -14.366723 |
| Ti | 2.008374  | 6.035957  | -13.786849 |
| O  | 4.000794  | 6.374211  | -14.194214 |
| O  | 2.835654  | 3.958608  | -13.615962 |
| O  | 3.227825  | 4.102736  | -9.881741  |
| O  | 4.144548  | 6.545118  | -10.144615 |
| O  | 5.468151  | 4.764399  | -12.056532 |
| Ti | 4.985168  | 4.830042  | -10.184212 |
| O  | 6.116277  | 3.195710  | -9.632957  |
| Ti | 4.645763  | 4.564122  | -13.718167 |
| O  | 5.056633  | 2.619668  | -14.282844 |
| Ti | 4.676813  | 1.352595  | -12.849148 |
| Ti | 5.559777  | 1.286864  | -10.167296 |
| O  | 3.804972  | -0.126820 | -13.312866 |

|    |           |           |            |
|----|-----------|-----------|------------|
| Ti | 2.009363  | -1.162524 | -13.239746 |
| O  | 2.873291  | -1.770737 | -11.617106 |
| O  | 4.721551  | -0.332421 | -9.716806  |
| Ti | 2.902677  | -1.068838 | -9.909009  |
| O  | 3.932725  | 2.056450  | -11.139898 |
| O  | 1.318674  | -2.285136 | -14.598766 |
| O  | 1.637078  | 0.577077  | -14.214590 |
| Ti | 1.205768  | 2.558911  | -13.942161 |
| O  | 6.296906  | 0.995163  | -11.857508 |
| O  | 1.438067  | 2.208945  | -12.127277 |
| O  | 2.139674  | 0.736581  | -9.702201  |
| Ti | 1.844311  | 2.657334  | -10.377148 |
| Ti | -8.232738 | 4.510133  | -11.456689 |
| Ti | -8.908728 | 4.646503  | -14.195959 |
| O  | -7.430304 | 6.018992  | -10.909103 |
| Ti | -5.636171 | 6.987668  | -10.935704 |
| O  | -6.228852 | 7.676449  | -12.585006 |
| O  | -8.132509 | 6.358473  | -14.472436 |
| Ti | -6.310515 | 6.906541  | -14.319708 |
| O  | -7.379708 | 3.820121  | -13.118547 |
| O  | -4.875625 | 8.107411  | -9.625889  |
| O  | -5.300609 | 5.164266  | -10.060372 |
| Ti | -4.662078 | 3.263137  | -10.369413 |
| O  | -9.775272 | 4.879968  | -12.549797 |
| O  | -4.755912 | 3.610765  | -12.183475 |
| O  | -5.648263 | 5.061603  | -14.501249 |
| Ti | -5.234862 | 3.157311  | -13.924343 |
| Ti | -8.224917 | 1.401492  | -10.577835 |
| O  | -8.756812 | 3.318730  | -10.005906 |
| O  | -6.659125 | 1.805976  | -14.471773 |
| O  | -7.720365 | -0.587405 | -14.161222 |
| O  | -8.939497 | 1.247507  | -12.299632 |
| Ti | -8.449477 | 1.165274  | -14.178676 |
| O  | -9.551137 | 2.797343  | -14.822680 |
| O  | -6.397865 | 2.041722  | -10.649551 |
| Ti | -3.113105 | -2.464430 | -13.319796 |
| O  | -3.863487 | -3.786123 | -12.049887 |
| Ti | -3.351386 | -3.018203 | -10.430423 |
| O  | -2.462267 | -1.636839 | -11.570044 |
| O  | -4.827728 | -1.791909 | -9.972352  |
| O  | -4.493599 | -1.987438 | -14.685385 |
| O  | -4.410990 | 1.098130  | -13.944882 |
| Ti | -5.782944 | -0.389338 | -14.130963 |
| O  | -5.529106 | -0.558886 | -12.255068 |
| O  | -4.006484 | 1.205677  | -10.005909 |
| Ti | -5.582690 | -0.008638 | -10.470140 |
| O  | -7.534876 | -0.328166 | -9.987967  |
| O  | -2.727567 | 3.538107  | -10.204203 |
| O  | -3.188107 | 3.355229  | -14.356482 |
| Ti | -0.578816 | -1.829281 | -14.739233 |
| O  | 0.161813  | -1.418548 | -12.437001 |
| O  | 1.142681  | -2.119272 | -9.635816  |

|    |           |           |            |
|----|-----------|-----------|------------|
| Ti | -0.541225 | -1.773965 | -10.688067 |
| O  | -1.515531 | -3.382702 | -9.831714  |
| O  | -1.661409 | -3.330751 | -14.138585 |
| O  | -2.077523 | -0.675561 | -13.972027 |
| Ti | -2.451423 | 1.236922  | -13.959631 |
| O  | -2.077877 | 1.399288  | -12.093621 |
| O  | -1.105351 | -0.172370 | -9.761072  |
| Ti | -1.955007 | 1.558508  | -10.303235 |
| Ti | -3.820389 | 9.360395  | -15.836897 |
| O  | -4.558879 | 8.952572  | -18.134739 |
| O  | -5.545531 | 9.657393  | -20.935243 |
| Ti | -3.859064 | 9.307207  | -19.885698 |
| O  | -2.883056 | 10.914823 | -20.743212 |
| O  | -2.736795 | 10.862861 | -16.435883 |
| O  | -2.319888 | 8.207182  | -16.603388 |
| Ti | -1.946446 | 6.294138  | -16.614944 |
| O  | -2.318678 | 6.132382  | -18.480874 |
| O  | -3.298643 | 7.703948  | -20.811744 |
| Ti | -2.444584 | 5.973502  | -20.271190 |
| O  | -1.671175 | 3.993770  | -20.370446 |
| O  | -1.210046 | 4.175732  | -16.218550 |
| Ti | -1.285243 | 9.995583  | -17.254629 |
| O  | -0.534464 | 11.317323 | -18.523480 |
| Ti | -1.047223 | 10.549368 | -20.143980 |
| O  | -1.937571 | 9.168964  | -19.004938 |
| O  | 0.427854  | 9.322236  | -20.602549 |
| O  | 0.096450  | 9.519315  | -15.890907 |
| O  | 0.012824  | 6.433111  | -16.629498 |
| Ti | 1.384852  | 7.920514  | -16.444137 |
| O  | 1.130249  | 8.089373  | -18.319948 |
| O  | -0.393372 | 6.326309  | -20.568965 |
| Ti | 1.184046  | 7.539609  | -20.104982 |
| O  | 3.135832  | 7.859529  | -20.587478 |
| O  | 1.998325  | 5.489760  | -19.925628 |
| O  | 2.260696  | 5.724725  | -16.103472 |
| O  | 3.322432  | 8.117998  | -16.414954 |
| O  | 4.540753  | 6.282503  | -18.276512 |
| Ti | 4.051009  | 6.365206  | -16.397528 |
| O  | 5.152600  | 4.733278  | -15.752847 |
| Ti | 3.825745  | 6.130008  | -19.998452 |
| O  | 4.356461  | 4.212382  | -20.569552 |
| Ti | 3.834305  | 3.020963  | -19.119633 |
| Ti | 4.510342  | 2.884234  | -16.380022 |
| O  | 3.032880  | 1.512487  | -19.666630 |
| Ti | 1.238580  | 0.544002  | -19.639196 |
| O  | 1.831337  | -0.145015 | -17.989755 |
| O  | 3.735160  | 1.171846  | -16.103764 |
| Ti | 1.913028  | 0.624785  | -16.254874 |
| O  | 2.981609  | 3.710657  | -17.457444 |
| O  | 0.477950  | -0.576152 | -20.948922 |
| O  | 0.902815  | 2.367373  | -20.514781 |
| Ti | 0.263432  | 4.268184  | -20.205447 |

|    |            |           |            |
|----|------------|-----------|------------|
| O  | 5.377193   | 2.651559  | -18.026298 |
| O  | 0.357594   | 3.919960  | -18.391444 |
| O  | 1.251120   | 2.469754  | -16.073030 |
| Ti | 0.836547   | 4.373429  | -16.650680 |
| Ti | -9.075005  | 6.177493  | -17.725541 |
| Ti | -9.957865  | 6.241226  | -20.407566 |
| O  | -8.203767  | 7.656688  | -17.260821 |
| Ti | -6.408938  | 8.694115  | -17.332231 |
| O  | -7.269499  | 9.299863  | -18.955929 |
| O  | -9.116031  | 7.858733  | -20.858930 |
| Ti | -7.297931  | 8.592401  | -20.662148 |
| O  | -8.331917  | 5.471127  | -19.434035 |
| O  | -5.718819  | 9.816857  | -15.973609 |
| O  | -6.034275  | 6.953849  | -16.360437 |
| Ti | -5.603991  | 4.971982  | -16.631768 |
| O  | -10.695319 | 6.535207  | -18.718073 |
| O  | -5.838376  | 5.320414  | -18.446581 |
| O  | -6.535289  | 6.790785  | -20.869806 |
| Ti | -6.242013  | 4.869094  | -20.196472 |
| Ti | -9.044398  | 2.966307  | -16.857350 |
| O  | -9.456672  | 4.910794  | -16.293404 |
| O  | -7.626288  | 3.425640  | -20.693318 |
| O  | -8.543929  | 0.984160  | -20.431534 |
| O  | -9.866547  | 2.765344  | -18.519301 |
| Ti | -9.384170  | 2.699443  | -20.391680 |
| O  | -10.516251 | 4.333921  | -20.942834 |
| O  | -7.234348  | 3.572227  | -16.958165 |
| Ti | -3.985945  | -0.807698 | -19.644799 |
| O  | -4.585982  | -2.184756 | -18.341313 |
| Ti | -4.029595  | -1.472957 | -16.702850 |
| O  | -3.381343  | 0.062947  | -17.908174 |
| O  | -5.488381  | -0.178727 | -16.202308 |
| O  | -5.329228  | -0.336237 | -21.058621 |
| O  | -5.386500  | 2.792637  | -20.197708 |
| Ti | -6.619096  | 1.235909  | -20.414228 |
| O  | -6.346108  | 0.892790  | -18.559469 |
| O  | -5.016574  | 2.868148  | -16.208289 |
| Ti | -6.406670  | 1.495142  | -16.788535 |
| O  | -8.399276  | 1.156443  | -16.381531 |
| O  | -3.691081  | 5.203431  | -16.527623 |
| O  | -4.200718  | 5.001848  | -20.685873 |
| Ti | -1.423449  | -0.059016 | -21.040191 |
| O  | -0.759227  | 0.561224  | -18.983751 |
| O  | 0.089221   | -0.431245 | -16.132686 |
| Ti | -1.443421  | 0.113750  | -17.264643 |
| O  | -2.107798  | -1.706085 | -16.402641 |
| O  | -2.476052  | -1.591672 | -20.454693 |
| O  | -3.049610  | 1.023847  | -20.340842 |
| Ti | -3.406001  | 2.932114  | -20.249291 |
| O  | -3.165195  | 2.992565  | -18.360484 |
| O  | -2.103565  | 1.453767  | -16.051860 |
| Ti | -2.976312  | 3.222533  | -16.567596 |



|    |            |           |            |
|----|------------|-----------|------------|
| Ti | -5.537219  | 10.870654 | -22.645318 |
| O  | -5.957068  | 10.588071 | -24.500038 |
| O  | -6.931953  | 11.142489 | -27.044548 |
| Ti | -4.996593  | 10.834938 | -26.176603 |
| O  | -3.948077  | 12.550231 | -26.591075 |
| O  | -4.326507  | 12.310523 | -22.606459 |
| O  | -3.817888  | 9.647475  | -22.812780 |
| Ti | -3.068230  | 7.895777  | -22.956025 |
| O  | -2.939464  | 7.526961  | -24.824929 |
| O  | -4.163915  | 9.237861  | -26.963994 |
| Ti | -3.213195  | 7.555011  | -26.635411 |
| O  | -2.453521  | 5.448162  | -26.625902 |
| O  | -2.318061  | 5.759311  | -22.552122 |
| Ti | -2.640778  | 11.406087 | -22.994190 |
| O  | -1.722541  | 12.684290 | -24.253498 |
| Ti | -2.136372  | 11.963664 | -25.891292 |
| O  | -3.184434  | 10.644493 | -24.954806 |
| O  | -0.736020  | 10.728476 | -26.591215 |
| O  | -0.795670  | 10.964384 | -22.218159 |
| O  | -1.114385  | 8.105105  | -22.687237 |
| Ti | 0.495126   | 9.427465  | -22.699767 |
| O  | 0.147969   | 9.219512  | -24.566673 |
| O  | -1.212013  | 7.802106  | -27.047980 |
| Ti | 0.244606   | 9.037928  | -26.371572 |
| O  | 2.253602   | 9.550878  | -26.643034 |
| O  | 1.178940   | 7.007188  | -26.332331 |
| O  | 1.272352   | 7.148110  | -22.363836 |
| O  | 2.403451   | 9.448984  | -22.846308 |
| O  | 3.790819   | 7.857355  | -24.721973 |
| Ti | 3.128005   | 7.652404  | -22.856296 |
| O  | 4.510909   | 6.327016  | -21.981463 |
| Ti | 2.958319   | 7.711000  | -26.358460 |
| O  | 3.655749   | 5.831140  | -27.033567 |
| Ti | 3.399510   | 4.720621  | -25.481955 |
| Ti | 4.024099   | 4.517208  | -22.714837 |
| O  | 2.378008   | 3.311298  | -25.960406 |
| Ti | 0.692052   | 2.280363  | -25.913640 |
| O  | 1.137197   | 1.626554  | -24.230473 |
| O  | 2.912654   | 3.036544  | -22.455878 |
| Ti | 1.081422   | 2.485733  | -22.532433 |
| O  | 2.755477   | 5.658044  | -23.873494 |
| O  | 0.009597   | 0.976857  | -27.122401 |
| O  | 0.063625   | 3.898474  | -26.965961 |
| Ti | -0.519147  | 5.774452  | -26.519468 |
| O  | 4.870144   | 4.144828  | -24.367072 |
| O  | -0.284345  | 5.563696  | -24.664014 |
| O  | 0.330517   | 4.263976  | -22.387903 |
| Ti | -0.364574  | 6.111323  | -22.892653 |
| Ti | -10.783649 | 7.852609  | -23.596028 |
| Ti | -11.132942 | 7.751157  | -26.374868 |
| O  | -10.208759 | 9.489737  | -22.944165 |
| Ti | -8.422350  | 10.055091 | -23.360334 |

|    |            |           |            |
|----|------------|-----------|------------|
| O  | -8.684909  | 10.526451 | -25.121787 |
| O  | -10.252442 | 9.248396  | -27.089470 |
| Ti | -8.380082  | 9.810625  | -26.846082 |
| O  | -9.735526  | 7.277582  | -25.058337 |
| O  | -7.465637  | 11.080025 | -22.131966 |
| O  | -7.518582  | 8.388974  | -22.878740 |
| Ti | -6.765263  | 6.555323  | -22.984291 |
| O  | -12.206777 | 8.139400  | -24.852755 |
| O  | -6.744030  | 6.637238  | -24.875107 |
| O  | -7.533966  | 8.090179  | -27.138134 |
| Ti | -6.855966  | 6.259809  | -26.644553 |
| Ti | -10.153403 | 4.560649  | -23.007619 |
| O  | -10.941922 | 6.374953  | -22.369215 |
| O  | -8.482085  | 5.045821  | -26.834030 |
| O  | -9.443763  | 2.524173  | -26.561240 |
| O  | -10.860316 | 4.276057  | -24.695899 |
| Ti | -10.218224 | 4.244487  | -26.521913 |
| O  | -11.406683 | 5.874524  | -26.994168 |
| O  | -8.376518  | 5.201937  | -23.094281 |
| Ti | -4.643107  | 0.796386  | -26.015186 |
| O  | -5.311249  | -0.507338 | -24.696982 |
| Ti | -4.857641  | 0.271482  | -23.047009 |
| O  | -4.147145  | 1.766930  | -24.364796 |
| O  | -6.334486  | 1.504418  | -22.515249 |
| O  | -6.231863  | 1.176927  | -27.161823 |
| O  | -6.164546  | 4.164053  | -26.717591 |
| Ti | -7.512049  | 2.721730  | -26.597847 |
| O  | -7.336805  | 2.588292  | -24.732077 |
| O  | -6.092247  | 4.505909  | -22.483133 |
| Ti | -7.475915  | 3.104094  | -22.951555 |
| O  | -9.436847  | 2.720314  | -22.562730 |
| O  | -4.803570  | 6.818085  | -22.984300 |
| O  | -4.907071  | 6.477523  | -27.073641 |
| Ti | -1.838679  | 1.487600  | -27.071353 |
| O  | -1.395561  | 2.277224  | -25.222275 |
| O  | -0.718125  | 1.378567  | -22.410290 |
| Ti | -2.251238  | 1.869269  | -23.525937 |
| O  | -2.921576  | 0.066546  | -22.730632 |
| O  | -2.988165  | 0.039803  | -26.616339 |
| O  | -3.597892  | 2.605188  | -27.002219 |
| Ti | -4.166122  | 4.454237  | -26.582564 |
| O  | -4.245996  | 4.420561  | -24.699011 |
| O  | -3.086049  | 3.142084  | -22.376956 |
| Ti | -4.100504  | 4.854724  | -22.901342 |
| Ti | -6.666505  | 12.251404 | -28.822050 |
| O  | -6.634979  | 11.680035 | -30.692302 |
| O  | -7.679241  | 11.982730 | -33.535074 |
| Ti | -6.076337  | 11.894626 | -32.472644 |
| O  | -4.772675  | 13.235140 | -32.479412 |
| O  | -5.486391  | 13.677349 | -28.708385 |
| O  | -4.968429  | 11.080010 | -28.412373 |
| Ti | -3.962658  | 9.537546  | -29.233927 |

|    |            |           |            |
|----|------------|-----------|------------|
| O  | -4.137708  | 8.903596  | -31.122599 |
| O  | -5.095995  | 10.549275 | -33.349702 |
| Ti | -4.132551  | 8.998785  | -32.924416 |
| O  | -3.327233  | 7.068739  | -33.450644 |
| O  | -3.193577  | 7.466786  | -28.842874 |
| Ti | -3.697769  | 12.856051 | -28.698988 |
| O  | -2.999294  | 13.956561 | -30.152270 |
| Ti | -3.175106  | 12.760877 | -31.573892 |
| O  | -3.577214  | 11.363379 | -30.342933 |
| O  | -1.862707  | 12.163452 | -32.773593 |
| O  | -1.823790  | 12.575860 | -27.950277 |
| O  | -1.976152  | 9.689874  | -28.992762 |
| Ti | -0.579583  | 11.189566 | -28.705457 |
| O  | -0.540693  | 11.325700 | -30.572223 |
| O  | -2.121640  | 9.307627  | -33.052837 |
| Ti | -0.826893  | 10.608846 | -32.313533 |
| O  | 0.892423   | 10.152039 | -32.938873 |
| O  | -0.373794  | 8.530802  | -31.249817 |
| O  | 0.436389   | 8.868692  | -28.667022 |
| O  | 1.358687   | 11.444729 | -28.535589 |
| O  | 2.702004   | 9.698822  | -30.530040 |
| Ti | 2.136369   | 9.753851  | -28.707207 |
| O  | 3.260864   | 7.947843  | -28.405595 |
| Ti | 1.601779   | 8.829713  | -31.744359 |
| O  | 2.690123   | 7.682872  | -32.884383 |
| Ti | 2.677643   | 6.097544  | -31.941645 |
| Ti | 2.926259   | 6.099121  | -29.091441 |
| O  | 1.908819   | 4.661737  | -32.842972 |
| Ti | 0.016675   | 4.355524  | -32.707199 |
| O  | -0.013899  | 3.802039  | -30.936243 |
| O  | 1.888490   | 4.561694  | -28.882726 |
| Ti | 0.004293   | 4.123308  | -29.053706 |
| O  | 1.580028   | 6.880638  | -30.553377 |
| O  | -1.247837  | 3.264929  | -33.627037 |
| O  | -0.489167  | 6.102486  | -33.249953 |
| Ti | -1.649549  | 7.300554  | -32.431063 |
| O  | 3.995954   | 5.711076  | -30.631409 |
| O  | -2.051211  | 6.560839  | -30.822366 |
| O  | -0.559596  | 5.923458  | -28.712858 |
| Ti | -1.190890  | 7.733657  | -29.385228 |
| Ti | -11.753088 | 9.278366  | -29.658112 |
| Ti | -11.679557 | 8.943701  | -32.444787 |
| O  | -11.254718 | 11.002559 | -29.150817 |
| Ti | -9.470462  | 11.400849 | -29.676318 |
| O  | -9.494752  | 11.493180 | -31.528813 |
| O  | -10.962430 | 10.252895 | -33.532052 |
| Ti | -9.106322  | 10.814480 | -33.254352 |
| O  | -10.466142 | 8.667979  | -30.958763 |
| O  | -8.570965  | 12.738972 | -28.794686 |
| O  | -8.483163  | 9.849070  | -29.028550 |
| Ti | -7.605743  | 8.058144  | -29.351392 |
| O  | -12.969532 | 9.431165  | -31.120746 |

|    |            |          |            |
|----|------------|----------|------------|
| O  | -7.423349  | 8.274569 | -31.231503 |
| O  | -8.372801  | 9.208217 | -33.874505 |
| Ti | -7.531939  | 7.776367 | -32.997185 |
| Ti | -11.000239 | 6.115767 | -29.054925 |
| O  | -12.039228 | 7.799576 | -28.496574 |
| O  | -9.170576  | 6.665732 | -32.672439 |
| O  | -10.215129 | 4.345575 | -33.325387 |
| O  | -11.618413 | 5.683130 | -30.780451 |
| Ti | -10.888426 | 5.908640 | -32.506039 |
| O  | -11.989408 | 7.270783 | -33.237724 |
| O  | -9.250863  | 6.790818 | -29.161253 |
| Ti | -5.958071  | 2.098384 | -32.073162 |
| O  | -6.590923  | 0.726627 | -30.854409 |
| Ti | -6.076104  | 1.591583 | -29.261881 |
| O  | -5.417120  | 3.085461 | -30.509972 |
| O  | -7.539242  | 2.864573 | -28.754080 |
| O  | -7.323959  | 2.908211 | -33.046070 |
| O  | -6.949492  | 5.699985 | -33.542932 |
| Ti | -8.335363  | 4.517172 | -32.848250 |
| O  | -8.441374  | 4.536519 | -30.964931 |
| O  | -6.858847  | 5.979956 | -28.925485 |
| Ti | -8.346118  | 4.634467 | -29.120878 |
| O  | -10.315320 | 4.267137 | -28.649252 |
| O  | -5.679170  | 8.342714 | -29.192923 |
| O  | -5.687278  | 7.899193 | -33.666693 |
| Ti | -3.033371  | 3.122509 | -33.003831 |
| O  | -2.746953  | 3.261738 | -31.184852 |
| O  | -1.507916  | 2.705912 | -28.726259 |
| Ti | -3.379191  | 2.987033 | -29.406047 |
| O  | -4.216608  | 1.262309 | -29.013784 |
| O  | -4.400887  | 1.747015 | -33.034784 |
| O  | -4.099755  | 4.456548 | -33.749462 |
| Ti | -4.982949  | 5.989129 | -33.086664 |
| O  | -5.139335  | 5.951856 | -31.242091 |
| O  | -4.093642  | 4.647199 | -28.786874 |
| Ti | -4.835475  | 6.407496 | -29.402194 |

anatase-like 3-D (1,1,0)-mer

|    |           |          |           |
|----|-----------|----------|-----------|
| Ti | -6.726869 | 3.586965 | -2.291642 |
| O  | -7.135573 | 3.392476 | -0.454676 |
| O  | -9.058321 | 3.017656 | 1.797223  |
| Ti | -7.402033 | 3.819437 | 1.353242  |
| O  | -7.081830 | 5.605463 | 1.764290  |
| O  | -6.230039 | 5.413470 | -2.190338 |
| O  | -5.136274 | 2.882003 | -2.914432 |
| Ti | -3.511576 | 2.151638 | -2.220610 |
| O  | -3.622397 | 2.253743 | -0.420234 |
| O  | -5.779474 | 3.121587 | 2.097565  |
| Ti | -3.863345 | 2.701853 | 1.487140  |
| O  | -2.057346 | 1.363938 | 2.046880  |
| O  | -1.806353 | 0.938766 | -2.519443 |
| Ti | -4.731142 | 5.827883 | -1.137654 |

|    |            |           |           |
|----|------------|-----------|-----------|
| O  | -5.152919  | 7.083321  | 0.218417  |
| Ti | -5.158768  | 5.885967  | 1.705508  |
| O  | -4.491199  | 4.530289  | 0.358458  |
| O  | -3.477237  | 6.550227  | 2.523212  |
| O  | -3.269350  | 6.030259  | -2.229252 |
| O  | -2.059844  | 3.547091  | -2.573003 |
| Ti | -1.475011  | 5.348108  | -1.899905 |
| O  | -1.632045  | 5.709829  | -0.067392 |
| O  | -2.345868  | 3.982298  | 1.802460  |
| Ti | -1.658358  | 5.981604  | 1.809719  |
| O  | -0.222075  | 7.258689  | 1.839295  |
| O  | 0.227368   | 4.562528  | 1.977424  |
| O  | 0.323267   | 4.074182  | -1.470573 |
| O  | -0.039986  | 6.421592  | -2.569966 |
| O  | 1.823872   | 6.332605  | -0.046710 |
| Ti | 1.455932   | 5.588072  | -1.716171 |
| Ti | 1.332886   | 6.167803  | 1.789662  |
| Ti | -0.656911  | 2.738386  | 1.624710  |
| O  | -0.517304  | 1.993362  | -0.098540 |
| Ti | -0.465974  | 2.273058  | -1.947397 |
| Ti | -9.912683  | -1.956741 | -1.605031 |
| Ti | -10.155089 | -1.683820 | 1.172357  |
| O  | -9.962079  | -0.427720 | -2.658609 |
| Ti | -8.581561  | 0.912573  | -2.461882 |
| O  | -8.828036  | 1.225202  | -0.611947 |
| O  | -10.552835 | 0.074163  | 1.641037  |
| Ti | -9.104854  | 1.234948  | 1.236368  |
| O  | -8.725491  | -1.603272 | -0.111130 |
| O  | -8.186044  | 2.650393  | -3.088152 |
| O  | -7.121495  | -0.049649 | -3.043077 |
| Ti | -5.706726  | -0.867198 | -2.082969 |
| O  | -11.276301 | -2.189833 | -0.279674 |
| O  | -5.895984  | -0.489101 | -0.298718 |
| O  | -7.635138  | 0.415837  | 2.097960  |
| Ti | -5.969727  | -0.568251 | 1.611829  |
| Ti | -7.678116  | -4.158030 | -1.635808 |
| O  | -9.331503  | -3.545083 | -2.384576 |
| O  | -6.716729  | -2.500086 | 1.703300  |
| O  | -6.310514  | -5.151206 | 2.186676  |
| O  | -8.217050  | -4.636934 | 0.120736  |
| Ti | -7.889882  | -3.969677 | 1.841216  |
| O  | -9.574858  | -2.919543 | 2.475203  |
| O  | -6.585432  | -2.656730 | -1.974206 |
| O  | -3.248865  | -5.119750 | -2.564468 |
| O  | -3.250087  | -4.746156 | 2.155716  |
| O  | -4.201688  | -1.905868 | 2.025942  |
| Ti | -4.867180  | -3.776363 | 1.713953  |
| O  | -4.709275  | -3.982505 | -0.129696 |
| O  | -4.087333  | -2.269974 | -2.510662 |
| Ti | -4.726732  | -4.069334 | -2.010658 |
| O  | -6.305851  | -5.210291 | -2.327696 |
| O  | -4.269307  | 0.321588  | -2.730430 |

|    |           |           |           |
|----|-----------|-----------|-----------|
| O  | -4.544209 | 0.760034  | 1.592366  |
| O  | -1.238294 | -1.420804 | 2.192454  |
| Ti | -2.809453 | -0.457605 | 1.554641  |
| O  | -2.657383 | -0.890594 | -0.294585 |
| O  | -1.176567 | -1.696918 | -3.002796 |
| Ti | -2.636913 | -0.878535 | -2.166643 |
| O  | 1.031929  | 1.746226  | -2.925030 |
| Ti | 2.512340  | 0.873152  | -2.156760 |
| O  | 2.470778  | 0.958007  | -0.312695 |
| O  | 1.049633  | 1.941558  | 2.205822  |
| Ti | 2.590898  | 0.898225  | 1.617986  |
| O  | 4.363903  | -0.407020 | 2.091234  |
| O  | 4.166794  | -0.376220 | -2.607801 |
| O  | 3.203842  | 5.475475  | 2.272864  |
| O  | 2.993824  | 5.053477  | -2.632869 |
| O  | 3.982443  | 2.219362  | -2.566037 |
| Ti | 4.514472  | 4.056850  | -2.041908 |
| O  | 4.316426  | 4.152181  | -0.198974 |
| O  | 4.043714  | 2.283570  | 1.692296  |
| Ti | 4.614711  | 4.263556  | 1.667631  |
| O  | 6.119277  | 5.465612  | 1.760665  |
| O  | 6.570148  | 2.796063  | 1.919600  |
| O  | 6.363647  | 2.648078  | -1.610531 |
| O  | 6.099918  | 5.072655  | -2.539781 |
| O  | 8.055284  | 4.904877  | -0.084744 |
| Ti | 7.506137  | 4.154333  | -1.692459 |
| O  | 9.137312  | 3.445458  | -2.388242 |
| Ti | 7.661765  | 4.399279  | 1.706890  |
| O  | 9.571915  | 3.681715  | 2.167603  |
| Ti | 10.231276 | 1.959527  | 1.378997  |
| Ti | 9.782474  | 1.999888  | -1.388802 |
| O  | 10.285205 | 0.131834  | 1.833458  |
| Ti | 8.827238  | -1.107094 | 1.656135  |
| O  | 8.491488  | -1.087052 | -0.235662 |
| O  | 9.815332  | 0.393076  | -2.325733 |
| Ti | 8.417294  | -0.897814 | -2.071433 |
| O  | 8.677353  | 1.883843  | 0.165706  |
| O  | 8.575215  | -2.969348 | 1.874581  |
| O  | 7.266038  | -0.104965 | 2.243431  |
| Ti | 5.729395  | 0.987213  | 1.613218  |
| O  | 11.264793 | 2.236509  | -0.182503 |
| O  | 5.641685  | 0.392628  | -0.166192 |
| O  | 7.013949  | 0.068939  | -2.848696 |
| Ti | 5.574739  | 0.864096  | -1.963192 |
| Ti | 0.339487  | -2.258876 | -2.051792 |
| O  | 0.261942  | -2.020719 | -0.225691 |
| Ti | 0.401349  | -2.306184 | 1.650480  |
| Ti | -1.587631 | -5.615140 | -1.826806 |
| O  | -0.426482 | -4.215519 | 1.589437  |
| O  | -0.005059 | -6.895428 | 2.103787  |
| O  | -1.947861 | -6.253379 | -0.094230 |
| Ti | -1.591416 | -5.702214 | 1.675596  |

|    |           |           |           |
|----|-----------|-----------|-----------|
| O  | -0.516250 | -4.067186 | -1.816649 |
| Ti | 4.869945  | -6.485080 | 1.483488  |
| O  | 5.056253  | -7.538677 | -0.050439 |
| Ti | 4.693938  | -6.088109 | -1.298757 |
| O  | 4.559592  | -4.982458 | 0.289182  |
| O  | 3.117830  | -6.131491 | -2.273206 |
| O  | 2.978461  | -6.503653 | 2.052658  |
| O  | 2.171349  | -3.641397 | 2.042455  |
| Ti | 1.369772  | -5.470835 | 1.660982  |
| O  | 1.351970  | -5.516153 | -0.190615 |
| O  | 1.998511  | -3.549683 | -2.584392 |
| Ti | 1.359091  | -5.359298 | -2.059954 |
| O  | -0.097078 | -6.488173 | -2.642235 |
| O  | 1.731402  | -0.963551 | -2.540300 |
| O  | 1.855066  | -0.985986 | 1.726638  |
| Ti | 6.940648  | -3.952263 | 1.721270  |
| O  | 6.884140  | -3.723842 | -0.162674 |
| O  | 8.066572  | -2.662999 | -2.682648 |
| Ti | 6.641530  | -3.705334 | -2.018107 |
| O  | 6.194472  | -5.561824 | -2.263948 |
| O  | 6.630108  | -5.881813 | 2.228712  |
| O  | 5.265343  | -3.153898 | 2.290022  |
| Ti | 3.620637  | -2.253268 | 1.654182  |
| O  | 3.521718  | -2.258431 | -0.246809 |
| O  | 5.042342  | -2.989652 | -2.673752 |
| Ti | 3.434039  | -2.185937 | -2.098193 |
| Ti | -5.485313 | 3.192736  | 4.300450  |
| O  | -5.429957 | 2.964239  | 6.184629  |
| O  | -6.611577 | 1.903962  | 8.705014  |
| Ti | -5.186320 | 2.944811  | 8.039432  |
| O  | -4.739059 | 4.801131  | 8.286021  |
| O  | -5.175274 | 5.121929  | 3.792006  |
| O  | -3.811104 | 2.393325  | 3.731101  |
| Ti | -2.166714 | 1.491899  | 4.367023  |
| O  | -2.068203 | 1.497168  | 6.268249  |
| O  | -3.587685 | 2.228513  | 8.695802  |
| Ti | -1.980087 | 1.425912  | 8.119305  |
| O  | -0.277766 | 0.200434  | 8.561517  |
| O  | -0.401635 | 0.224495  | 4.294583  |
| Ti | -3.414952 | 5.725924  | 4.538140  |
| O  | -3.601581 | 6.778872  | 6.072609  |
| Ti | -3.239778 | 5.327782  | 7.320246  |
| O  | -3.105570 | 4.222561  | 5.732105  |
| O  | -1.663225 | 5.371361  | 8.294950  |
| O  | -1.523914 | 5.743947  | 3.968703  |
| O  | -0.718045 | 2.880310  | 3.978738  |
| Ti | 0.084010  | 4.709683  | 4.360430  |
| O  | 0.101489  | 4.754974  | 6.212034  |
| O  | -0.544877 | 2.788614  | 8.605500  |
| Ti | 0.094939  | 4.598226  | 8.081293  |
| O  | 1.550961  | 5.727496  | 8.663644  |
| O  | 1.970221  | 3.306311  | 7.838569  |

|    |           |           |          |
|----|-----------|-----------|----------|
| O  | 1.880117  | 3.454495  | 4.431794 |
| O  | 1.458846  | 6.134462  | 3.917477 |
| O  | 3.401703  | 5.492422  | 6.115554 |
| Ti | 3.045101  | 4.941139  | 4.345756 |
| Ti | 3.041540  | 4.853648  | 7.848453 |
| Ti | 1.115053  | 1.498300  | 8.072811 |
| O  | 1.191336  | 1.260277  | 6.247103 |
| Ti | 1.052324  | 1.545324  | 4.370592 |
| Ti | -8.777525 | -2.719357 | 4.642599 |
| Ti | -8.329238 | -2.760226 | 7.410362 |
| O  | -8.830633 | -0.891679 | 4.188028 |
| Ti | -7.372700 | 0.347363  | 4.365930 |
| O  | -7.037553 | 0.326920  | 6.256201 |
| O  | -8.360846 | -1.153832 | 8.347589 |
| Ti | -6.962769 | 0.136963  | 8.093209 |
| O  | -7.223126 | -2.644406 | 5.855656 |
| O  | -7.120395 | 2.209511  | 4.147456 |
| O  | -5.812294 | -0.656008 | 3.777986 |
| Ti | -4.275985 | -1.748038 | 4.408596 |
| O  | -9.810733 | -2.996123 | 6.203977 |
| O  | -4.188267 | -1.153196 | 6.186538 |
| O  | -5.559574 | -0.830636 | 8.870696 |
| Ti | -4.121148 | -1.625207 | 7.983821 |
| Ti | -6.208186 | -5.159892 | 4.314333 |
| O  | -8.118059 | -4.441937 | 3.854221 |
| O  | -4.909988 | -3.409577 | 7.630901 |
| O  | -4.645871 | -5.833266 | 8.561547 |
| O  | -6.601195 | -5.665831 | 6.107336 |
| Ti | -6.052418 | -4.915317 | 7.713062 |
| O  | -7.683080 | -4.207402 | 8.409050 |
| O  | -5.123494 | -3.557558 | 4.101872 |
| O  | -1.749748 | -6.236483 | 3.748515 |
| O  | -1.539194 | -5.814188 | 8.653718 |
| O  | -2.528426 | -2.980660 | 8.587282 |
| Ti | -3.060219 | -4.818236 | 8.063161 |
| O  | -2.862930 | -4.913941 | 6.220284 |
| O  | -2.590147 | -3.044635 | 4.329168 |
| Ti | -3.161174 | -5.024799 | 4.353606 |
| O  | -4.665738 | -6.226654 | 4.260055 |
| O  | -2.910434 | -0.354363 | 3.929878 |
| O  | -2.712848 | -0.386506 | 8.629114 |
| O  | 0.420797  | -2.503462 | 8.946034 |
| Ti | -1.058332 | -1.634467 | 8.177734 |
| O  | -1.017244 | -1.719464 | 6.333900 |
| O  | 0.404112  | -2.702343 | 3.815344 |
| Ti | -1.137461 | -1.659493 | 4.402987 |
| O  | 2.691862  | 0.659896  | 3.828642 |
| Ti | 4.263242  | -0.303393 | 4.466578 |
| O  | 4.110234  | 0.129598  | 6.315917 |
| O  | 2.631107  | 0.935800  | 9.024062 |
| Ti | 4.090442  | 0.117612  | 8.187838 |
| O  | 5.723138  | -1.082895 | 8.751596 |



|    |           |           |          |
|----|-----------|-----------|----------|
| O  | 5.997607  | -1.521533 | 4.429036 |
| O  | 4.702753  | 4.359276  | 8.586275 |
| O  | 4.703933  | 3.985347  | 3.865476 |
| O  | 5.654939  | 1.145022  | 3.995152 |
| Ti | 6.320462  | 3.015441  | 4.307470 |
| O  | 6.163108  | 3.221844  | 6.151010 |
| O  | 5.540690  | 1.508954  | 8.532174 |
| Ti | 6.180091  | 3.308512  | 8.031882 |
| O  | 7.759093  | 4.450044  | 8.348996 |
| O  | 8.038758  | 1.896470  | 7.995421 |
| O  | 8.170328  | 1.739717  | 4.318368 |
| O  | 7.764083  | 4.390757  | 3.834715 |
| O  | 9.670850  | 3.876950  | 5.900467 |
| Ti | 9.343292  | 3.208934  | 4.180288 |
| O  | 11.028637 | 2.160486  | 3.546196 |
| Ti | 9.131158  | 3.397956  | 7.658209 |
| O  | 10.784519 | 2.785645  | 8.407014 |
| Ti | 11.366840 | 1.198294  | 7.627440 |
| Ti | 11.609687 | 0.925005  | 4.850126 |
| O  | 11.416555 | -0.331257 | 8.681148 |
| Ti | 10.036105 | -1.672451 | 8.483396 |
| O  | 10.282555 | -1.983066 | 6.632762 |
| O  | 12.007904 | -0.832702 | 4.381049 |
| Ti | 10.559417 | -1.993791 | 4.787168 |
| O  | 10.179932 | 0.844650  | 6.133459 |
| O  | 9.639806  | -3.410181 | 9.108692 |
| O  | 8.575157  | -0.709900 | 9.065080 |
| Ti | 7.160323  | 0.107079  | 8.102792 |
| O  | 12.730517 | 1.431943  | 6.302279 |
| O  | 7.349599  | -0.271150 | 6.322045 |
| O  | 9.089707  | -1.174959 | 3.923917 |
| Ti | 7.422956  | -0.192236 | 4.409564 |
| Ti | 2.110521  | -3.499081 | 4.396619 |
| O  | 1.970690  | -2.753418 | 6.119693 |
| Ti | 1.920476  | -3.034004 | 7.968101 |
| Ti | 0.121894  | -6.929162 | 4.231664 |
| O  | 1.131003  | -4.835387 | 7.490750 |
| O  | 1.494681  | -7.182205 | 8.591285 |
| O  | -0.369375 | -7.094508 | 6.068083 |
| Ti | -0.001149 | -6.349251 | 7.736734 |
| O  | 1.226551  | -5.323487 | 4.043903 |
| Ti | 6.187138  | -6.587672 | 7.158337 |
| O  | 6.609425  | -7.843014 | 5.802468 |
| Ti | 6.617246  | -6.645842 | 4.315074 |
| O  | 5.945937  | -5.290532 | 5.662061 |
| O  | 4.932315  | -7.309853 | 3.497950 |
| O  | 4.724712  | -6.790101 | 8.249219 |
| O  | 3.513831  | -4.308058 | 8.594202 |
| Ti | 2.929809  | -6.108968 | 7.920817 |
| O  | 3.084497  | -6.471042 | 6.088357 |
| O  | 3.799030  | -4.743280 | 4.218785 |
| Ti | 3.112256  | -6.742515 | 4.211337 |

|    |           |           |          |
|----|-----------|-----------|----------|
| O  | 1.676532  | -8.019459 | 4.181148 |
| O  | 3.510939  | -2.125296 | 3.974068 |
| O  | 3.260227  | -1.700430 | 8.540858 |
| Ti | 8.182343  | -4.346145 | 8.311560 |
| O  | 8.589468  | -4.150861 | 6.476321 |
| O  | 10.513700 | -3.775715 | 4.224479 |
| Ti | 8.856967  | -4.580070 | 4.666164 |
| O  | 8.536257  | -6.363223 | 4.257039 |
| O  | 7.685942  | -6.172768 | 8.210848 |
| O  | 6.590705  | -3.642446 | 8.935124 |
| Ti | 4.965508  | -2.912479 | 8.241656 |
| O  | 5.075847  | -3.014875 | 6.441332 |
| O  | 7.233686  | -3.880985 | 3.923674 |
| Ti | 5.317303  | -3.459440 | 4.533875 |

anatase-like 3-D (1,1,1)-mer

|    |           |           |           |
|----|-----------|-----------|-----------|
| Ti | -6.712333 | 3.609230  | -2.376253 |
| O  | -7.136513 | 3.303727  | -0.541468 |
| O  | -9.096464 | 3.272938  | 1.762103  |
| Ti | -7.433005 | 3.950007  | 1.197563  |
| O  | -7.148876 | 5.758769  | 1.407678  |
| O  | -6.253574 | 5.421823  | -2.297449 |
| O  | -5.155294 | 2.873391  | -3.043941 |
| Ti | -3.539269 | 2.106513  | -2.371621 |
| O  | -3.690163 | 2.133223  | -0.571712 |
| O  | -5.734448 | 3.496523  | 2.042891  |
| Ti | -3.962763 | 2.660934  | 1.317458  |
| O  | -2.137311 | 1.339768  | 1.816521  |
| O  | -1.812395 | 0.914722  | -2.656201 |
| Ti | -4.689805 | 5.827780  | -1.297046 |
| O  | -5.068636 | 7.069250  | 0.043005  |
| Ti | -5.191938 | 5.840886  | 1.550079  |
| O  | -4.497078 | 4.486840  | 0.127099  |
| O  | -3.554730 | 6.649991  | 2.389275  |
| O  | -3.293143 | 6.016122  | -2.496062 |
| O  | -2.108963 | 3.529499  | -2.661942 |
| Ti | -1.540564 | 5.367451  | -2.022992 |
| O  | -1.739206 | 5.769310  | -0.210459 |
| O  | -2.417525 | 3.976984  | 1.549826  |
| Ti | -1.771503 | 5.981611  | 1.691094  |
| O  | -0.350596 | 7.271968  | 1.793929  |
| O  | 0.129238  | 4.601455  | 1.861841  |
| O  | 0.247483  | 4.102923  | -1.564792 |
| O  | -0.097567 | 6.468155  | -2.657458 |
| O  | 1.723541  | 6.385158  | -0.114778 |
| Ti | 1.372725  | 5.631074  | -1.786109 |
| Ti | 1.226342  | 6.202485  | 1.720272  |
| Ti | -0.736657 | 2.764570  | 1.451452  |
| O  | -0.530023 | 1.937936  | -0.237551 |
| Ti | -0.501894 | 2.281788  | -2.067175 |
| Ti | -9.644234 | -1.777005 | -1.200790 |
| Ti | -9.800393 | -1.393517 | 1.627206  |

|    |            |           |           |
|----|------------|-----------|-----------|
| O  | -9.883541  | -0.436762 | -2.470085 |
| Ti | -8.624374  | 1.017477  | -2.549946 |
| O  | -9.135737  | 1.513943  | -0.774645 |
| O  | -10.534005 | 0.392143  | 1.758986  |
| Ti | -9.240217  | 1.530540  | 1.076827  |
| O  | -8.361673  | -1.270728 | 0.229180  |
| O  | -8.182501  | 2.720168  | -3.221123 |
| O  | -7.181498  | -0.000402 | -3.139728 |
| Ti | -5.707494  | -0.862616 | -2.322138 |
| O  | -10.923881 | -1.946879 | 0.160203  |
| O  | -5.842574  | -0.397973 | -0.560676 |
| O  | -7.663270  | 0.689655  | 1.812536  |
| Ti | -6.211978  | -0.658142 | 1.292058  |
| Ti | -7.609681  | -4.192326 | -1.626302 |
| O  | -9.273347  | -3.398808 | -2.065592 |
| O  | -6.775870  | -2.661328 | 1.540311  |
| O  | -6.330717  | -5.274394 | 2.208749  |
| O  | -8.147828  | -4.838252 | 0.073736  |
| Ti | -7.929409  | -4.161509 | 1.807405  |
| O  | -9.562955  | -3.189473 | 2.425119  |
| O  | -6.558257  | -2.649890 | -1.959576 |
| O  | -3.219938  | -5.139136 | -2.656925 |
| O  | -3.305268  | -4.869296 | 2.041792  |
| O  | -4.338493  | -1.943171 | 1.799991  |
| Ti | -4.925649  | -3.869088 | 1.597393  |
| O  | -4.734609  | -4.077042 | -0.248236 |
| O  | -4.122679  | -2.302534 | -2.730042 |
| Ti | -4.702682  | -4.083045 | -2.139287 |
| O  | -6.292397  | -5.191557 | -2.497955 |
| O  | -4.256259  | 0.291081  | -3.014660 |
| O  | -4.720109  | 0.733318  | 1.461092  |
| O  | -1.358790  | -1.430132 | 1.947133  |
| Ti | -2.986076  | -0.449020 | 1.330048  |
| O  | -2.743662  | -0.946886 | -0.502662 |
| O  | -1.204478  | -1.748767 | -3.195873 |
| Ti | -2.651269  | -0.902199 | -2.367941 |
| O  | 0.993794   | 1.796551  | -3.087504 |
| Ti | 2.461928   | 0.905691  | -2.336928 |
| O  | 2.439537   | 0.995541  | -0.494087 |
| O  | 1.065182   | 2.077084  | 2.011365  |
| Ti | 2.583520   | 0.977467  | 1.434890  |
| O  | 4.325056   | -0.329842 | 1.882835  |
| O  | 4.122341   | -0.314695 | -2.810188 |
| O  | 3.115683   | 5.564683  | 2.212011  |
| O  | 2.907139   | 5.105793  | -2.717529 |
| O  | 3.942530   | 2.266512  | -2.695208 |
| Ti | 4.423878   | 4.098244  | -2.137857 |
| O  | 4.225158   | 4.236719  | -0.296868 |
| O  | 4.046499   | 2.347272  | 1.530821  |
| Ti | 4.538266   | 4.359514  | 1.573499  |
| O  | 6.055961   | 5.537686  | 1.676951  |
| O  | 6.552738   | 2.877046  | 1.783513  |

|    |           |           |           |
|----|-----------|-----------|-----------|
| O  | 6.275856  | 2.684315  | -1.640228 |
| O  | 6.021043  | 5.089028  | -2.651832 |
| O  | 7.989257  | 4.987649  | -0.186560 |
| Ti | 7.414022  | 4.187034  | -1.763290 |
| O  | 9.041632  | 3.463511  | -2.445697 |
| Ti | 7.624872  | 4.485767  | 1.610600  |
| O  | 9.530148  | 3.775861  | 2.091793  |
| Ti | 10.162370 | 2.023325  | 1.342598  |
| Ti | 9.691134  | 2.031268  | -1.428435 |
| O  | 10.276087 | 0.172970  | 1.737937  |
| Ti | 8.861952  | -1.101611 | 1.550732  |
| O  | 8.622730  | -1.178015 | -0.344845 |
| O  | 9.765838  | 0.437189  | -2.386313 |
| Ti | 8.401381  | -0.899426 | -2.172122 |
| O  | 8.591945  | 1.902792  | 0.129022  |
| O  | 8.614437  | -2.995852 | 1.861292  |
| O  | 7.303558  | -0.073850 | 2.051640  |
| Ti | 5.755848  | 1.048016  | 1.438017  |
| O  | 11.173012 | 2.311464  | -0.236192 |
| O  | 5.615036  | 0.349389  | -0.313408 |
| O  | 6.995847  | 0.105679  | -2.918299 |
| Ti | 5.526676  | 0.891744  | -2.079888 |
| Ti | 0.318593  | -2.249171 | -2.216818 |
| O  | 0.231333  | -1.946893 | -0.400714 |
| Ti | 0.358035  | -2.240984 | 1.474466  |
| Ti | -1.564772 | -5.621735 | -1.896636 |
| O  | -0.387867 | -4.190653 | 1.514062  |
| O  | 0.029903  | -6.867592 | 2.055780  |
| O  | -1.904717 | -6.247621 | -0.155362 |
| Ti | -1.541859 | -5.670334 | 1.608625  |
| O  | -0.503934 | -4.064876 | -1.884323 |
| Ti | 4.956653  | -6.385390 | 1.337393  |
| O  | 5.048587  | -7.473256 | -0.205757 |
| Ti | 4.604304  | -6.045923 | -1.430194 |
| O  | 4.325267  | -4.951116 | 0.104865  |
| O  | 3.065988  | -6.160233 | -2.481566 |
| O  | 3.058862  | -6.552958 | 1.988727  |
| O  | 2.159313  | -3.602188 | 1.850368  |
| Ti | 1.457123  | -5.478771 | 1.539842  |
| O  | 1.337345  | -5.558790 | -0.304924 |
| O  | 1.960448  | -3.541291 | -2.745243 |
| Ti | 1.355243  | -5.356055 | -2.183166 |
| O  | -0.106466 | -6.492455 | -2.753737 |
| O  | 1.685468  | -0.932383 | -2.744401 |
| O  | 1.823361  | -0.917242 | 1.536621  |
| Ti | 6.956515  | -3.828822 | 1.454414  |
| O  | 6.733008  | -3.359954 | -0.389056 |
| O  | 8.018047  | -2.618155 | -2.886616 |
| Ti | 6.537544  | -3.596005 | -2.220194 |
| O  | 6.119645  | -5.454205 | -2.357762 |
| O  | 6.718507  | -5.698037 | 1.580863  |
| O  | 5.288559  | -2.978013 | 2.007116  |

|    |            |           |           |
|----|------------|-----------|-----------|
| Ti | 3.572125   | -2.184173 | 1.404199  |
| O  | 3.474626   | -2.212534 | -0.492059 |
| O  | 4.965647   | -2.940128 | -3.006049 |
| Ti | 3.398501   | -2.142484 | -2.343508 |
| Ti | -5.367051  | 3.392186  | 4.236014  |
| O  | -6.022569  | 3.191643  | 6.076903  |
| O  | -7.544315  | 2.272663  | 8.323957  |
| Ti | -5.951083  | 3.246725  | 7.889918  |
| O  | -5.407204  | 5.110094  | 8.047576  |
| O  | -5.314701  | 5.378018  | 3.658532  |
| O  | -3.781164  | 2.531750  | 3.521177  |
| Ti | -2.209763  | 1.462610  | 4.122987  |
| O  | -2.344754  | 1.650070  | 5.955000  |
| O  | -4.136706  | 2.628469  | 8.277296  |
| Ti | -2.407903  | 1.788484  | 7.858677  |
| O  | -0.564565  | 0.536241  | 8.297265  |
| O  | -0.431901  | 0.261482  | 4.021646  |
| Ti | -3.571528  | 5.937988  | 4.435849  |
| O  | -3.641658  | 6.864579  | 6.065829  |
| Ti | -3.723110  | 5.343720  | 7.280912  |
| O  | -3.738182  | 4.299343  | 5.585716  |
| O  | -2.275823  | 5.463533  | 8.539290  |
| O  | -1.760405  | 5.615330  | 3.836983  |
| O  | -0.794114  | 2.908305  | 3.741983  |
| Ti | -0.030206  | 4.728209  | 4.278616  |
| O  | -0.473417  | 5.023283  | 6.073439  |
| O  | -0.984450  | 3.157148  | 8.038456  |
| Ti | -0.287479  | 5.103249  | 7.939761  |
| O  | 1.156862   | 6.416713  | 7.890950  |
| O  | 1.606026   | 3.785152  | 8.137693  |
| O  | 1.748681   | 3.563152  | 4.406834  |
| O  | 1.324591   | 6.159687  | 3.847163  |
| O  | 3.291909   | 5.591903  | 6.042068  |
| Ti | 2.973345   | 5.014792  | 4.291213  |
| Ti | 2.734488   | 5.386055  | 7.869512  |
| Ti | 0.795453   | 1.925387  | 7.845931  |
| O  | 0.943181   | 1.739637  | 6.041031  |
| Ti | 0.985242   | 1.612525  | 4.115528  |
| Ti | -8.842962  | -2.774905 | 4.518560  |
| Ti | -8.709950  | -2.462652 | 7.314182  |
| O  | -8.987707  | -1.021970 | 3.594849  |
| Ti | -7.481329  | 0.393618  | 3.970449  |
| O  | -8.017966  | 0.592647  | 5.799188  |
| O  | -9.109806  | -0.796805 | 8.028259  |
| Ti | -7.799082  | 0.547409  | 7.623443  |
| O  | -7.491469  | -2.329409 | 5.833097  |
| O  | -6.797356  | 2.117344  | 3.911671  |
| O  | -6.066651  | -0.832113 | 3.487780  |
| Ti | -4.391337  | -1.772055 | 4.122044  |
| O  | -10.013626 | -2.988657 | 5.991259  |
| O  | -4.596485  | -1.377817 | 5.911499  |
| O  | -6.200390  | -0.352548 | 8.209711  |

|    |           |           |          |
|----|-----------|-----------|----------|
| Ti | -4.576672 | -1.424345 | 7.805202 |
| Ti | -6.217568 | -5.234411 | 4.350098 |
| O  | -8.095425 | -4.507110 | 3.922999 |
| O  | -5.260492 | -3.357385 | 7.836370 |
| O  | -4.811979 | -6.000132 | 8.306178 |
| O  | -6.819421 | -5.439768 | 6.193715 |
| Ti | -6.417460 | -4.853856 | 7.899411 |
| O  | -8.043524 | -3.734312 | 8.558609 |
| O  | -5.156415 | -3.644439 | 3.945514 |
| O  | -1.701867 | -6.152927 | 3.723359 |
| O  | -1.691837 | -5.551940 | 8.302855 |
| O  | -2.773622 | -2.714712 | 8.307170 |
| Ti | -3.365148 | -4.606126 | 7.904026 |
| O  | -3.137657 | -4.673368 | 6.091945 |
| O  | -2.636365 | -3.048752 | 4.042787 |
| Ti | -3.207420 | -5.023331 | 4.218631 |
| O  | -4.701739 | -6.301250 | 4.339511 |
| O  | -3.042162 | -0.356340 | 3.713117 |
| O  | -3.134352 | -0.097694 | 7.859987 |
| O  | 0.272462  | -2.253443 | 8.376715 |
| Ti | -1.365171 | -1.290392 | 7.845609 |
| O  | -1.205337 | -1.527790 | 6.017452 |
| O  | 0.444784  | -2.539114 | 3.646705 |
| Ti | -1.231303 | -1.638522 | 4.111989 |
| O  | 2.635422  | 0.732036  | 3.665478 |
| Ti | 4.272733  | -0.230964 | 4.196571 |
| O  | 4.112857  | 0.005573  | 6.024637 |
| O  | 2.463464  | 1.017859  | 8.395894 |
| Ti | 4.138798  | 0.116595  | 7.930101 |
| O  | 5.949889  | -1.165512 | 8.328926 |
| O  | 6.042383  | -1.423296 | 4.182358 |
| O  | 4.610323  | 4.632200  | 8.319596 |
| O  | 4.600498  | 4.031159  | 3.739633 |
| O  | 5.680646  | 1.193651  | 3.735199 |
| Ti | 6.273049  | 3.084729  | 4.138641 |
| O  | 6.045227  | 3.152146  | 5.950542 |
| O  | 5.543499  | 1.527346  | 7.999518 |
| Ti | 6.115183  | 3.501946  | 7.823916 |
| O  | 7.609957  | 4.779797  | 7.702942 |
| O  | 8.063927  | 2.123128  | 8.097339 |
| O  | 8.168222  | 1.836472  | 4.206278 |
| O  | 7.720189  | 4.479091  | 3.736332 |
| O  | 9.727483  | 3.918002  | 5.849107 |
| Ti | 9.325851  | 3.332765  | 4.143270 |
| O  | 10.950978 | 2.212760  | 3.484062 |
| Ti | 9.125586  | 3.712793  | 7.692792 |
| O  | 11.003247 | 2.985324  | 8.120061 |
| Ti | 11.751485 | 1.253369  | 7.524407 |
| Ti | 11.617659 | 0.940962  | 4.728717 |
| O  | 11.896131 | -0.499232 | 8.448649 |
| Ti | 10.389598 | -1.913008 | 8.071668 |
| O  | 10.923395 | -2.113973 | 6.242345 |

|    |           |           |           |
|----|-----------|-----------|-----------|
| O  | 12.017238 | -0.725217 | 4.014918  |
| Ti | 10.705326 | -2.068960 | 4.417947  |
| O  | 10.399716 | 0.807485  | 6.210272  |
| O  | 9.704361  | -3.636793 | 8.132003  |
| O  | 8.973915  | -0.688315 | 8.553855  |
| Ti | 7.298178  | 0.250794  | 7.919861  |
| O  | 12.921566 | 1.467206  | 6.051268  |
| O  | 7.503470  | -0.142103 | 6.130155  |
| O  | 9.108007  | -1.167578 | 3.831354  |
| Ti | 7.484123  | -0.096417 | 4.236333  |
| Ti | 2.112995  | -3.446828 | 4.196432  |
| O  | 1.965336  | -3.261386 | 6.001212  |
| Ti | 1.922561  | -3.134148 | 7.926860  |
| Ti | 0.173114  | -6.907466 | 4.173410  |
| O  | 1.159570  | -5.085089 | 7.635782  |
| O  | 1.583796  | -7.681262 | 8.195719  |
| O  | -0.383782 | -7.113688 | 6.000776  |
| Ti | -0.063834 | -6.535783 | 7.751707  |
| O  | 1.303315  | -5.306370 | 3.905171  |
| Ti | 6.480500  | -7.459714 | 7.609224  |
| O  | 6.549359  | -8.388838 | 5.978091  |
| Ti | 6.630837  | -6.869547 | 4.764148  |
| O  | 6.646933  | -5.822566 | 6.457217  |
| O  | 5.184322  | -6.985292 | 3.504424  |
| O  | 4.668814  | -7.136440 | 8.206574  |
| O  | 3.701833  | -4.430227 | 8.300766  |
| Ti | 2.938362  | -6.249991 | 7.764228  |
| O  | 3.382564  | -6.544825 | 5.969402  |
| O  | 3.893895  | -4.678468 | 4.003803  |
| Ti | 3.194100  | -6.624332 | 4.103073  |
| O  | 1.751740  | -7.937902 | 4.151709  |
| O  | 3.473246  | -2.058129 | 3.745040  |
| O  | 3.340058  | -1.783495 | 8.020451  |
| Ti | 8.276608  | -4.914038 | 7.808637  |
| O  | 8.935342  | -4.720594 | 5.968803  |
| O  | 10.449529 | -3.795169 | 3.719423  |
| Ti | 8.859463  | -4.771687 | 4.156041  |
| O  | 8.312801  | -6.634188 | 3.995975  |
| O  | 8.223627  | -6.899815 | 8.386081  |
| O  | 6.689160  | -4.054330 | 8.521207  |
| Ti | 5.117807  | -2.984735 | 7.919365  |
| O  | 5.254146  | -3.172953 | 6.087286  |
| O  | 7.049858  | -4.144993 | 3.765746  |
| Ti | 5.317451  | -3.310772 | 4.183630  |
| Ti | -4.046575 | 2.310286  | 10.588046 |
| O  | -3.826078 | 1.839312  | 12.431151 |
| O  | -5.110042 | 1.093873  | 14.928667 |
| Ti | -3.629269 | 2.076239  | 14.262074 |
| O  | -3.209568 | 3.934098  | 14.400428 |
| O  | -3.809386 | 4.179313  | 10.464043 |
| O  | -2.379882 | 1.457197  | 10.035790 |
| Ti | -0.663977 | 0.662317  | 10.637923 |

|    |           |           |           |
|----|-----------|-----------|-----------|
| O  | -0.566696 | 0.691301  | 12.534457 |
| O  | -2.057492 | 1.419104  | 15.048011 |
| Ti | -0.490567 | 0.620308  | 14.385722 |
| O  | 1.222575  | -0.588231 | 14.786452 |
| O  | 1.084905  | -0.604347 | 10.505987 |
| Ti | -2.047577 | 4.866128  | 10.706537 |
| O  | -2.137522 | 5.953801  | 12.250291 |
| Ti | -1.695966 | 4.525664  | 13.473728 |
| O  | -1.416796 | 3.431094  | 11.938725 |
| O  | -0.156547 | 4.639263  | 14.525730 |
| O  | -0.149818 | 5.032530  | 10.054255 |
| O  | 0.748561  | 2.080747  | 10.192248 |
| Ti | 1.451222  | 3.957222  | 10.502778 |
| O  | 1.571349  | 4.036749  | 12.347855 |
| O  | 0.947606  | 2.019731  | 14.787984 |
| Ti | 1.553454  | 3.834523  | 14.225630 |
| O  | 3.015045  | 4.971232  | 14.796521 |
| O  | 3.412243  | 2.543206  | 13.928226 |
| O  | 3.295850  | 2.669462  | 10.528664 |
| O  | 2.878393  | 5.346445  | 9.987204  |
| O  | 4.812982  | 4.725793  | 12.198477 |
| Ti | 4.449810  | 4.149194  | 10.434039 |
| Ti | 4.473406  | 4.100139  | 13.939863 |
| Ti | 2.589189  | 0.727664  | 14.259382 |
| O  | 2.676354  | 0.426509  | 12.443839 |
| Ti | 2.549536  | 0.719891  | 10.568148 |
| Ti | -7.253469 | -3.542618 | 10.699016 |
| Ti | -6.782576 | -3.551106 | 13.469715 |
| O  | -7.365981 | -1.692397 | 10.303686 |
| Ti | -5.953234 | -0.415355 | 10.489495 |
| O  | -5.714517 | -0.338107 | 12.386208 |
| O  | -6.857069 | -1.956350 | 14.426834 |
| Ti | -5.493326 | -0.619007 | 14.212120 |
| O  | -5.682937 | -3.422665 | 11.912825 |
| O  | -5.704834 | 1.479254  | 10.174352 |
| O  | -4.395249 | -1.444488 | 9.990439  |
| Ti | -2.849173 | -2.568671 | 10.603855 |
| O  | -8.264409 | -3.830707 | 12.277770 |
| O  | -2.707858 | -1.869176 | 12.356454 |
| O  | -4.088357 | -1.625393 | 14.959020 |
| Ti | -2.619147 | -2.412473 | 14.121027 |
| Ti | -4.717042 | -6.006759 | 10.431969 |
| O  | -6.621735 | -5.296279 | 9.950993  |
| O  | -3.368075 | -4.205209 | 13.681868 |
| O  | -3.113041 | -6.609484 | 14.694931 |
| O  | -5.080820 | -6.509014 | 12.229701 |
| Ti | -4.506018 | -5.707522 | 13.805286 |
| O  | -6.133263 | -4.985731 | 14.487572 |
| O  | -3.643449 | -4.397761 | 10.259042 |
| O  | -0.207502 | -7.085923 | 9.830826  |
| O  | 0.001509  | -6.626410 | 14.759928 |
| O  | -1.035068 | -3.787727 | 14.737492 |



|    |           |           |           |
|----|-----------|-----------|-----------|
| Ti | -1.515575 | -5.619395 | 14.180392 |
| O  | -1.317111 | -5.758525 | 12.339488 |
| O  | -1.139518 | -3.868449 | 10.511733 |
| Ti | -1.631274 | -5.880629 | 10.469098 |
| O  | -3.147845 | -7.058519 | 10.365218 |
| O  | -1.417255 | -1.191778 | 10.159108 |
| O  | -1.214635 | -1.205929 | 14.852499 |
| O  | 1.915193  | -3.324705 | 15.129528 |
| Ti | 0.445543  | -2.427090 | 14.379111 |
| O  | 0.468061  | -2.517336 | 12.536393 |
| O  | 1.842208  | -3.598781 | 10.031077 |
| Ti | 0.323807  | -2.499032 | 10.607359 |
| O  | 4.266026  | -0.091621 | 10.095134 |
| Ti | 5.892769  | -1.072718 | 10.712385 |
| O  | 5.650985  | -0.574883 | 12.545224 |
| O  | 4.110735  | 0.227192  | 15.238636 |
| Ti | 5.559158  | -0.619540 | 14.410594 |
| O  | 7.164635  | -1.809826 | 15.056731 |
| O  | 7.626910  | -2.255082 | 10.581508 |
| O  | 6.128647  | 3.618065  | 14.699996 |
| O  | 6.213442  | 3.348074  | 10.000715 |
| O  | 7.244964  | 0.421705  | 10.242235 |
| Ti | 7.833261  | 2.347295  | 10.445123 |
| O  | 7.641953  | 2.555087  | 12.290829 |
| O  | 7.028694  | 0.781130  | 14.772616 |
| Ti | 7.610950  | 2.561561  | 14.181710 |
| O  | 9.200676  | 3.670945  | 14.539829 |
| O  | 9.466780  | 1.129202  | 14.003511 |
| O  | 9.683347  | 1.139134  | 10.502352 |
| O  | 9.238725  | 3.752438  | 9.834310  |
| O  | 11.056035 | 3.315957  | 11.969239 |
| Ti | 10.837197 | 2.639310  | 10.235858 |
| O  | 12.471532 | 1.668222  | 9.617621  |
| Ti | 10.518374 | 2.671137  | 13.669694 |
| O  | 12.182403 | 1.877395  | 14.109599 |
| Ti | 12.555156 | 0.257438  | 13.244830 |
| Ti | 12.710041 | -0.126182 | 10.417234 |
| O  | 12.793719 | -1.083658 | 14.513659 |
| Ti | 11.533541 | -2.536784 | 14.593240 |
| O  | 12.042645 | -3.033287 | 12.817487 |
| O  | 13.442251 | -1.912356 | 10.284456 |
| Ti | 12.147589 | -3.049777 | 10.966287 |
| O  | 11.272608 | -0.248320 | 11.815166 |
| O  | 11.092037 | -4.239490 | 15.264054 |
| O  | 10.090101 | -1.519489 | 15.182528 |
| Ti | 8.615424  | -0.658439 | 14.364488 |
| O  | 13.834828 | 0.427072  | 11.883307 |
| O  | 8.750458  | -1.121518 | 12.603066 |
| O  | 10.570647 | -2.209212 | 10.230578 |
| Ti | 9.118002  | -0.863562 | 10.749705 |
| Ti | 3.643615  | -4.286004 | 10.591101 |
| O  | 3.437911  | -3.458457 | 12.280556 |

|    |           |           |           |
|----|-----------|-----------|-----------|
| Ti | 3.409552  | -3.802836 | 14.109475 |
| Ti | 1.681710  | -7.724295 | 10.322702 |
| O  | 2.661268  | -5.624205 | 13.606980 |
| O  | 3.006053  | -7.988992 | 14.700836 |
| O  | 1.185001  | -7.907280 | 12.157790 |
| Ti | 1.535916  | -7.152400 | 13.828691 |
| O  | 2.778598  | -6.123110 | 10.181552 |
| Ti | 7.599596  | -7.348321 | 13.341292 |
| O  | 7.978826  | -8.590248 | 12.001736 |
| Ti | 8.101502  | -7.362915 | 10.494101 |
| O  | 7.405229  | -6.008402 | 11.916123 |
| O  | 6.463567  | -8.171496 | 9.655326  |
| O  | 6.201922  | -7.536793 | 14.538830 |
| O  | 5.016838  | -5.050926 | 14.704588 |
| Ti | 4.449175  | -6.888933 | 14.065969 |
| O  | 4.647279  | -7.291376 | 12.253518 |
| O  | 5.324820  | -5.498780 | 10.493615 |
| Ti | 4.679455  | -7.503494 | 10.352219 |
| O  | 3.258729  | -8.793678 | 10.248712 |
| O  | 5.045229  | -2.861416 | 10.225623 |
| O  | 4.720545  | -2.437083 | 14.698918 |
| Ti | 9.621876  | -5.129048 | 14.420237 |
| O  | 10.045147 | -4.823658 | 12.584874 |
| O  | 12.004328 | -4.792377 | 10.280931 |
| Ti | 10.341636 | -5.471518 | 10.845815 |
| O  | 10.057852 | -7.278887 | 10.635918 |
| O  | 9.162876  | -6.941704 | 14.341936 |
| O  | 8.063901  | -4.393896 | 15.086570 |
| Ti | 6.447471  | -3.628004 | 14.414232 |
| O  | 6.597867  | -3.654798 | 12.614290 |
| O  | 8.642949  | -5.017273 | 10.001104 |
| Ti | 6.870015  | -4.182353 | 10.725329 |

anatase-like 3-D (1,1,2)-mer

|    |           |          |           |
|----|-----------|----------|-----------|
| Ti | -6.779650 | 3.594863 | -1.931171 |
| O  | -7.249036 | 3.124317 | -0.164652 |
| O  | -9.466257 | 3.176997 | 1.759183  |
| Ti | -7.580930 | 3.624104 | 1.702887  |
| O  | -7.298723 | 5.464143 | 1.745854  |
| O  | -6.416428 | 5.420972 | -2.046025 |
| O  | -5.252498 | 2.901145 | -2.782524 |
| Ti | -3.584387 | 2.111388 | -2.416234 |
| O  | -3.577049 | 1.951378 | -0.608688 |
| O  | -5.548598 | 3.483057 | 2.075557  |
| Ti | -3.953764 | 2.585195 | 1.230422  |
| O  | -2.160252 | 1.273391 | 1.694775  |
| O  | -1.846441 | 0.929873 | -2.832240 |
| Ti | -4.780937 | 5.818053 | -1.162405 |
| O  | -5.252162 | 6.942460 | 0.242734  |
| Ti | -5.352204 | 5.640990 | 1.699781  |
| O  | -4.528562 | 4.378337 | 0.068703  |
| O  | -3.672386 | 6.461744 | 2.468261  |

|    |            |           |           |
|----|------------|-----------|-----------|
| O  | -3.391020  | 6.064507  | -2.392272 |
| O  | -2.162537  | 3.543066  | -2.691902 |
| Ti | -1.644084  | 5.371166  | -2.002846 |
| O  | -1.794794  | 5.751206  | -0.177219 |
| O  | -2.429719  | 3.900820  | 1.524996  |
| Ti | -1.862724  | 5.921840  | 1.730081  |
| O  | -0.430019  | 7.213071  | 1.832116  |
| O  | 0.087950   | 4.543444  | 1.823406  |
| O  | 0.172117   | 4.068425  | -1.549054 |
| O  | -0.169544  | 6.425994  | -2.654993 |
| O  | 1.663323   | 6.360330  | -0.125060 |
| Ti | 1.300827   | 5.584875  | -1.783488 |
| Ti | 1.151211   | 6.153246  | 1.709985  |
| Ti | -0.750331  | 2.716152  | 1.335685  |
| O  | -0.549547  | 1.840571  | -0.341796 |
| Ti | -0.542223  | 2.262030  | -2.152870 |
| Ti | -9.667854  | -1.794208 | -1.386064 |
| Ti | -9.886131  | -1.412600 | 1.444404  |
| O  | -9.889016  | -0.464133 | -2.644861 |
| Ti | -8.695278  | 1.072315  | -2.633599 |
| O  | -9.539380  | 1.533878  | -0.968106 |
| O  | -10.695670 | 0.311316  | 1.612363  |
| Ti | -9.516024  | 1.559514  | 0.873792  |
| O  | -8.414009  | -1.253619 | 0.066400  |
| O  | -8.166625  | 2.810650  | -3.012170 |
| O  | -7.248972  | 0.065025  | -3.279664 |
| Ti | -5.770639  | -0.797643 | -2.479267 |
| O  | -10.958802 | -2.000223 | -0.043548 |
| O  | -5.955069  | -0.315861 | -0.726142 |
| O  | -7.840073  | 0.744035  | 1.567808  |
| Ti | -6.357435  | -0.643041 | 1.116253  |
| Ti | -7.640244  | -4.164371 | -1.794149 |
| O  | -9.305333  | -3.416626 | -2.262863 |
| O  | -6.898892  | -2.648051 | 1.430612  |
| O  | -6.431482  | -5.284314 | 2.039959  |
| O  | -8.203482  | -4.825155 | -0.100912 |
| Ti | -8.027745  | -4.174537 | 1.645470  |
| O  | -9.676720  | -3.203254 | 2.260036  |
| O  | -6.607008  | -2.600409 | -2.070271 |
| O  | -3.260703  | -5.071917 | -2.820392 |
| O  | -3.424099  | -4.909217 | 1.868736  |
| O  | -4.506403  | -1.938311 | 1.613396  |
| Ti | -5.028988  | -3.889097 | 1.428419  |
| O  | -4.836047  | -4.061430 | -0.418246 |
| O  | -4.205432  | -2.257283 | -2.941265 |
| Ti | -4.757379  | -4.026450 | -2.317619 |
| O  | -6.333335  | -5.137077 | -2.712094 |
| O  | -4.300204  | 0.332875  | -3.178927 |
| O  | -4.830551  | 0.698604  | 1.320468  |
| O  | -1.507018  | -1.527586 | 1.684563  |
| Ti | -3.095681  | -0.459446 | 1.109220  |
| O  | -2.844109  | -1.007549 | -0.714853 |

|    |           |           |           |
|----|-----------|-----------|-----------|
| O  | -1.250177 | -1.726914 | -3.411881 |
| Ti | -2.702760 | -0.880128 | -2.571660 |
| O  | 0.971529  | 1.833238  | -3.182006 |
| Ti | 2.451483  | 0.908450  | -2.493399 |
| O  | 2.459920  | 0.984369  | -0.649992 |
| O  | 1.053021  | 2.071449  | 1.884675  |
| Ti | 2.562662  | 0.981417  | 1.284057  |
| O  | 4.288649  | -0.341008 | 1.734878  |
| O  | 4.119616  | -0.328145 | -2.980958 |
| O  | 3.058057  | 5.487321  | 2.170687  |
| O  | 2.846549  | 5.058465  | -2.717563 |
| O  | 3.965442  | 2.238210  | -2.816086 |
| Ti | 4.391154  | 4.060285  | -2.207285 |
| O  | 4.236406  | 4.223817  | -0.363443 |
| O  | 4.055929  | 2.317544  | 1.410874  |
| Ti | 4.504747  | 4.333360  | 1.516668  |
| O  | 6.037721  | 5.502298  | 1.642643  |
| O  | 6.554189  | 2.840504  | 1.699529  |
| O  | 6.239022  | 2.603355  | -1.648497 |
| O  | 6.015932  | 4.995939  | -2.737701 |
| O  | 7.979299  | 4.922606  | -0.253859 |
| Ti | 7.384647  | 4.092857  | -1.809994 |
| O  | 8.993049  | 3.319992  | -2.483904 |
| Ti | 7.606970  | 4.456562  | 1.554079  |
| O  | 9.495370  | 3.688030  | 2.019461  |
| Ti | 10.111079 | 1.905580  | 1.325505  |
| Ti | 9.635092  | 1.894616  | -1.443852 |
| O  | 10.206672 | 0.043603  | 1.702094  |
| Ti | 8.837470  | -1.275480 | 1.528472  |
| O  | 8.719167  | -1.495243 | -0.355114 |
| O  | 9.776190  | 0.274416  | -2.362313 |
| Ti | 8.430120  | -1.072602 | -2.168327 |
| O  | 8.528613  | 1.736058  | 0.095847  |
| O  | 8.442487  | -3.228100 | 2.005080  |
| O  | 7.276712  | -0.213148 | 1.898087  |
| Ti | 5.773045  | 1.018455  | 1.312511  |
| O  | 11.108832 | 2.209869  | -0.260543 |
| O  | 5.583837  | 0.234793  | -0.409347 |
| O  | 7.030871  | -0.024994 | -2.878687 |
| Ti | 5.523550  | 0.815336  | -2.156563 |
| Ti | 0.277892  | -2.207474 | -2.439395 |
| O  | 0.190763  | -1.859366 | -0.632073 |
| Ti | 0.255555  | -2.234995 | 1.230840  |
| Ti | -1.611459 | -5.573204 | -2.063347 |
| O  | -0.490314 | -4.193861 | 1.293409  |
| O  | -0.075620 | -6.861764 | 1.883398  |
| O  | -1.978900 | -6.236619 | -0.343588 |
| Ti | -1.641653 | -5.671030 | 1.433647  |
| O  | -0.532437 | -4.023374 | -2.053441 |
| Ti | 4.836407  | -6.502387 | 1.155187  |
| O  | 4.888359  | -7.572111 | -0.409396 |
| Ti | 4.534847  | -6.103848 | -1.613268 |

|    |           |           |           |
|----|-----------|-----------|-----------|
| O  | 4.305183  | -5.016122 | -0.068579 |
| O  | 3.010753  | -6.145560 | -2.682457 |
| O  | 2.945418  | -6.583736 | 1.807201  |
| O  | 2.058240  | -3.592509 | 1.632829  |
| Ti | 1.355872  | -5.479490 | 1.371286  |
| O  | 1.292258  | -5.546966 | -0.486170 |
| O  | 1.922413  | -3.519814 | -2.941655 |
| Ti | 1.305134  | -5.325118 | -2.357917 |
| O  | -0.161787 | -6.452468 | -2.930588 |
| O  | 1.680386  | -0.916516 | -2.963951 |
| O  | 1.732777  | -0.900259 | 1.346116  |
| Ti | 6.752727  | -3.956889 | 1.274709  |
| O  | 6.757485  | -3.407017 | -0.534270 |
| O  | 8.033827  | -2.730703 | -3.010603 |
| Ti | 6.515435  | -3.673188 | -2.376092 |
| O  | 6.082889  | -5.522311 | -2.507600 |
| O  | 6.626219  | -5.832610 | 1.344582  |
| O  | 5.146849  | -3.026878 | 1.808485  |
| Ti | 3.451315  | -2.146230 | 1.226854  |
| O  | 3.409801  | -2.223943 | -0.671229 |
| O  | 4.957748  | -2.970783 | -3.131775 |
| Ti | 3.372581  | -2.144005 | -2.521409 |
| Ti | -5.427241 | 3.232754  | 4.316191  |
| O  | -5.964678 | 2.488605  | 6.035837  |
| O  | -7.733936 | 2.147623  | 8.247890  |
| Ti | -5.943067 | 2.909213  | 7.901232  |
| O  | -5.709204 | 4.815085  | 7.852381  |
| O  | -5.440001 | 5.245599  | 3.853090  |
| O  | -3.952863 | 2.264535  | 3.502239  |
| Ti | -2.258541 | 1.380644  | 3.970112  |
| O  | -2.219158 | 1.443706  | 5.805253  |
| O  | -3.867957 | 2.925332  | 7.966266  |
| Ti | -2.380990 | 1.735802  | 7.689691  |
| O  | -0.550449 | 0.475252  | 8.087100  |
| O  | -0.481579 | 0.157240  | 3.808436  |
| Ti | -3.645564 | 5.773260  | 4.521089  |
| O  | -3.723884 | 6.597161  | 6.181495  |
| Ti | -3.874525 | 5.008695  | 7.359708  |
| O  | -3.783909 | 4.069461  | 5.523104  |
| O  | -2.360377 | 5.468556  | 8.556752  |
| O  | -1.818712 | 5.520028  | 3.857042  |
| O  | -0.840758 | 2.831346  | 3.645228  |
| Ti | -0.080569 | 4.648248  | 4.251879  |
| O  | -0.452902 | 4.938562  | 6.051767  |
| O  | -0.958998 | 3.122316  | 7.868410  |
| Ti | -0.397485 | 5.121560  | 7.939823  |
| O  | 1.074105  | 6.398437  | 7.933409  |
| O  | 1.584991  | 3.788253  | 8.085204  |
| O  | 1.697192  | 3.473131  | 4.345963  |
| O  | 1.285883  | 6.089714  | 3.822757  |
| O  | 3.230865  | 5.522029  | 6.004697  |
| Ti | 2.921159  | 4.924481  | 4.249692  |

|    |            |           |          |
|----|------------|-----------|----------|
| Ti | 2.682594   | 5.378614  | 7.844859 |
| Ti | 0.777251   | 1.950801  | 7.666659 |
| O  | 0.973129   | 1.551461  | 5.895027 |
| Ti | 0.914394   | 1.522084  | 3.979848 |
| Ti | -8.927491  | -2.764153 | 4.312891 |
| Ti | -8.798530  | -2.471323 | 7.103334 |
| O  | -9.012887  | -1.009193 | 3.392814 |
| Ti | -7.668488  | 0.572183  | 3.689191 |
| O  | -8.290032  | 0.792035  | 5.454286 |
| O  | -9.203302  | -0.770220 | 7.730099 |
| Ti | -7.945409  | 0.595665  | 7.264124 |
| O  | -7.573933  | -2.332669 | 5.633592 |
| O  | -7.229095  | 2.487482  | 3.528304 |
| O  | -6.179246  | -0.594082 | 3.349734 |
| Ti | -4.568637  | -1.743560 | 3.882371 |
| O  | -10.104817 | -2.980675 | 5.776892 |
| O  | -4.710479  | -1.355205 | 5.684939 |
| O  | -6.310607  | -0.331160 | 7.834312 |
| Ti | -4.652902  | -1.456788 | 7.554622 |
| Ti | -6.332973  | -5.229922 | 4.203299 |
| O  | -8.209618  | -4.530909 | 3.753546 |
| O  | -5.380965  | -3.371274 | 7.679224 |
| O  | -4.981093  | -6.013018 | 8.263761 |
| O  | -6.912310  | -5.455968 | 6.052241 |
| Ti | -6.553827  | -4.863960 | 7.770768 |
| O  | -8.212408  | -3.793753 | 8.345742 |
| O  | -5.310105  | -3.622731 | 3.774840 |
| O  | -1.798931  | -6.161563 | 3.560309 |
| O  | -1.853566  | -5.674190 | 8.144993 |
| O  | -2.888442  | -2.748820 | 8.058708 |
| Ti | -3.509319  | -4.671358 | 7.757004 |
| O  | -3.314807  | -4.747605 | 5.940650 |
| O  | -2.807657  | -3.094857 | 3.831456 |
| Ti | -3.316521  | -5.048622 | 4.053223 |
| O  | -4.826801  | -6.310628 | 4.160496 |
| O  | -3.124316  | -0.423345 | 3.485637 |
| O  | -3.204797  | -0.122996 | 7.680145 |
| O  | 0.188157   | -2.260805 | 8.134566 |
| Ti | -1.449072  | -1.318027 | 7.581255 |
| O  | -1.341421  | -1.670803 | 5.777002 |
| O  | 0.311067   | -2.576198 | 3.387564 |
| Ti | -1.378819  | -1.701706 | 3.864393 |
| O  | 2.597409   | 0.703205  | 3.492258 |
| Ti | 4.235075   | -0.230415 | 4.026648 |
| O  | 4.131875   | 0.117695  | 5.843260 |
| O  | 2.531979   | 1.221944  | 8.253289 |
| Ti | 4.146077   | 0.234897  | 7.742026 |
| O  | 5.880730   | -1.067449 | 8.156708 |
| O  | 5.983330   | -1.471787 | 3.963075 |
| O  | 4.607904   | 4.693827  | 8.297000 |
| O  | 4.572531   | 3.968667  | 3.678586 |
| O  | 5.688293   | 1.165756  | 3.590945 |

|    |           |           |          |
|----|-----------|-----------|----------|
| Ti | 6.265148  | 3.053770  | 4.068391 |
| O  | 6.114435  | 3.201236  | 5.877854 |
| O  | 5.594522  | 1.605779  | 7.863735 |
| Ti | 6.125225  | 3.585534  | 7.764509 |
| O  | 7.713712  | 4.726690  | 7.681574 |
| O  | 8.172197  | 2.071962  | 8.015622 |
| O  | 8.149118  | 1.770649  | 4.088473 |
| O  | 7.733687  | 4.437906  | 3.676009 |
| O  | 9.783542  | 3.867125  | 5.782203 |
| Ti | 9.322079  | 3.263839  | 4.083137 |
| O  | 10.936162 | 2.135198  | 3.410100 |
| Ti | 9.249211  | 3.645457  | 7.639464 |
| O  | 11.129997 | 2.949128  | 8.193400 |
| Ti | 11.791114 | 1.187358  | 7.554252 |
| Ti | 11.566628 | 0.925784  | 4.760443 |
| O  | 11.763673 | -0.578281 | 8.179680 |
| Ti | 10.465420 | -2.027303 | 8.070687 |
| O  | 10.934999 | -2.488588 | 6.301303 |
| O  | 11.890936 | -0.799259 | 4.145893 |
| Ti | 10.647310 | -2.203803 | 4.486657 |
| O  | 10.343998 | 0.925856  | 6.193412 |
| O  | 9.844013  | -3.943125 | 8.448482 |
| O  | 8.883795  | -0.964935 | 8.296354 |
| Ti | 7.339726  | 0.262385  | 7.745160 |
| O  | 12.921615 | 1.407917  | 6.029385 |
| O  | 7.468923  | -0.190528 | 5.959964 |
| O  | 9.062321  | -1.292494 | 3.759967 |
| Ti | 7.450338  | -0.161511 | 4.084497 |
| Ti | 1.967826  | -3.428418 | 3.992907 |
| O  | 1.805124  | -3.203558 | 5.796119 |
| Ti | 1.903486  | -3.063821 | 7.701283 |
| Ti | 0.081945  | -6.888673 | 4.022057 |
| O  | 1.136944  | -5.048864 | 7.517331 |
| O  | 1.526643  | -7.640245 | 8.108739 |
| O  | -0.418103 | -7.050468 | 5.874018 |
| Ti | -0.094826 | -6.479139 | 7.634523 |
| O  | 1.187520  | -5.296880 | 3.708439 |
| Ti | 6.587478  | -7.138444 | 7.387428 |
| O  | 6.628176  | -8.046651 | 5.738249 |
| Ti | 6.593267  | -6.512524 | 4.530576 |
| O  | 6.416844  | -5.482008 | 6.221213 |
| O  | 5.097077  | -6.953409 | 3.310606 |
| O  | 4.701197  | -7.129552 | 8.026016 |
| O  | 3.684376  | -4.376899 | 8.063238 |
| Ti | 2.940802  | -6.236262 | 7.619751 |
| O  | 3.273889  | -6.555585 | 5.809901 |
| O  | 3.705701  | -4.676590 | 3.831011 |
| Ti | 3.125996  | -6.645149 | 3.934474 |
| O  | 1.651251  | -7.932952 | 3.986319 |
| O  | 3.341252  | -2.027480 | 3.567019 |
| O  | 3.270564  | -1.664864 | 7.804997 |
| Ti | 8.288237  | -4.595947 | 7.341245 |

|    |           |           |           |
|----|-----------|-----------|-----------|
| O  | 8.714621  | -3.851302 | 5.620353  |
| O  | 10.572094 | -3.790872 | 3.496030  |
| Ti | 8.765230  | -4.452594 | 3.792489  |
| O  | 8.430555  | -6.305968 | 3.961532  |
| O  | 8.367949  | -6.467586 | 7.720904  |
| O  | 6.815304  | -3.693129 | 8.211595  |
| Ti | 5.042885  | -2.885961 | 7.705581  |
| O  | 5.005514  | -3.027910 | 5.869891  |
| O  | 6.698281  | -4.389771 | 3.571009  |
| Ti | 5.121031  | -3.296433 | 3.996067  |
| Ti | -3.925795 | 2.314867  | 10.724414 |
| O  | -4.351977 | 1.567648  | 12.445055 |
| O  | -6.208918 | 1.509889  | 14.569387 |
| Ti | -4.402088 | 2.171695  | 14.272327 |
| O  | -4.067548 | 4.024497  | 14.101176 |
| O  | -4.005880 | 4.186963  | 10.346514 |
| O  | -2.453050 | 1.411189  | 9.853448  |
| Ti | -0.680804 | 0.603618  | 10.358679 |
| O  | -0.643339 | 0.745106  | 12.194544 |
| O  | -2.335678 | 2.108383  | 14.494084 |
| Ti | -0.759179 | 1.014243  | 14.068301 |
| O  | 1.020261  | -0.255954 | 14.497030 |
| O  | 1.092054  | -0.618085 | 10.259599 |
| Ti | -2.224963 | 4.857743  | 10.676683 |
| O  | -2.263200 | 5.765298  | 12.326475 |
| Ti | -2.229698 | 4.230344  | 13.533146 |
| O  | -2.053885 | 3.200180  | 11.842738 |
| O  | -0.733892 | 4.670718  | 14.753766 |
| O  | -0.339278 | 4.846490  | 10.037616 |
| O  | 0.677387  | 2.094431  | 10.000466 |
| Ti | 1.421582  | 3.953217  | 10.444520 |
| O  | 1.089730  | 4.271765  | 12.254540 |
| O  | 0.656236  | 2.393856  | 14.233554 |
| Ti | 1.236957  | 4.362556  | 14.130306 |
| O  | 2.711811  | 5.650395  | 14.078021 |
| O  | 3.174462  | 3.013849  | 14.355852 |
| O  | 3.225414  | 2.765291  | 10.546848 |
| O  | 2.835983  | 5.357352  | 9.955448  |
| O  | 4.780541  | 4.766618  | 12.190807 |
| Ti | 4.457631  | 4.195340  | 10.430425 |
| Ti | 4.280148  | 4.605800  | 14.042873 |
| Ti | 2.393517  | 1.145180  | 14.071492 |
| O  | 2.555155  | 0.919676  | 12.268427 |
| Ti | 2.457854  | 0.781376  | 10.362518 |
| Ti | -7.427989 | -3.469063 | 10.510691 |
| Ti | -7.203512 | -3.208160 | 13.304711 |
| O  | -7.398443 | -1.704455 | 9.885633  |
| Ti | -6.100022 | -0.253122 | 9.996179  |
| O  | -6.574432 | 0.207454  | 11.764124 |
| O  | -7.526523 | -1.482775 | 13.918790 |
| Ti | -6.283918 | -0.076975 | 13.578506 |
| O  | -5.980744 | -3.209906 | 11.872101 |



|    |           |           |           |
|----|-----------|-----------|-----------|
| O  | -5.477353 | 1.659955  | 9.613953  |
| O  | -4.519606 | -1.318408 | 9.768795  |
| Ti | -2.976722 | -2.545852 | 10.319485 |
| O  | -8.558494 | -3.689853 | 12.035958 |
| O  | -3.106146 | -2.092247 | 12.104608 |
| O  | -4.699698 | -0.989506 | 14.305222 |
| Ti | -3.088945 | -2.121534 | 13.980047 |
| Ti | -4.886932 | -5.928113 | 10.424863 |
| O  | -6.767275 | -5.231140 | 9.870620  |
| O  | -3.786915 | -4.054130 | 13.976432 |
| O  | -3.371045 | -6.721505 | 14.387744 |
| O  | -5.420488 | -6.150746 | 12.282110 |
| Ti | -4.959099 | -5.547100 | 13.981271 |
| O  | -6.573050 | -4.418951 | 14.656096 |
| O  | -3.810387 | -4.354480 | 10.048779 |
| O  | -0.245193 | -6.976824 | 9.767995  |
| O  | -0.209654 | -6.252283 | 14.384948 |
| O  | -1.327255 | -3.448978 | 14.473330 |
| Ti | -1.902588 | -5.337332 | 13.996302 |
| O  | -1.752237 | -5.484092 | 12.186787 |
| O  | -1.232429 | -3.888847 | 10.200349 |
| Ti | -1.762317 | -5.868642 | 10.300124 |
| O  | -3.350971 | -7.009144 | 10.382304 |
| O  | -1.518186 | -1.215403 | 9.907312  |
| O  | -1.622497 | -0.810448 | 14.101485 |
| O  | 1.764283  | -2.984700 | 14.571595 |
| Ti | 0.124743  | -2.052445 | 14.037874 |
| O  | 0.229927  | -2.400994 | 12.221276 |
| O  | 1.830009  | -3.504823 | 9.810102  |
| Ti | 0.216081  | -2.517548 | 10.322668 |
| O  | 4.173789  | -0.021496 | 9.929447  |
| Ti | 5.811524  | -0.963257 | 10.483761 |
| O  | 5.702217  | -0.609863 | 12.287846 |
| O  | 4.051428  | 0.295278  | 14.677487 |
| Ti | 5.740685  | -0.581529 | 14.200432 |
| O  | 7.485817  | -1.858938 | 14.579229 |
| O  | 7.566714  | -2.157915 | 10.382964 |
| O  | 6.161240  | 3.877924  | 14.504185 |
| O  | 6.216167  | 3.391666  | 9.919418  |
| O  | 7.250949  | 0.466491  | 10.005026 |
| Ti | 7.871980  | 2.388515  | 10.307814 |
| O  | 7.677074  | 2.465007  | 12.123962 |
| O  | 7.168704  | 0.811821  | 14.234920 |
| Ti | 7.678959  | 2.765009  | 14.011861 |
| O  | 9.190309  | 4.026599  | 13.903346 |
| O  | 9.671307  | 1.338231  | 14.290239 |
| O  | 9.743398  | 1.088019  | 10.385022 |
| O  | 9.343625  | 3.730214  | 9.800528  |
| O  | 11.274311 | 3.172378  | 12.012645 |
| Ti | 10.916001 | 2.581408  | 10.293928 |
| O  | 12.572402 | 1.509019  | 9.720510  |
| Ti | 10.695613 | 2.945177  | 13.862112 |

|    |           |           |           |
|----|-----------|-----------|-----------|
| O  | 12.573553 | 2.249627  | 14.312827 |
| Ti | 13.291104 | 0.483365  | 13.752898 |
| Ti | 13.158944 | 0.187049  | 10.962054 |
| O  | 13.376484 | -1.270505 | 14.673520 |
| Ti | 12.032268 | -2.853585 | 14.376911 |
| O  | 12.657877 | -3.068122 | 12.612445 |
| O  | 13.563763 | -1.512757 | 10.330796 |
| Ti | 12.308244 | -2.879044 | 10.802789 |
| O  | 11.936796 | 0.048935  | 12.433946 |
| O  | 11.596267 | -4.767851 | 14.530848 |
| O  | 10.540745 | -1.690698 | 14.717258 |
| Ti | 8.930303  | -0.541502 | 14.184372 |
| O  | 14.466332 | 0.698570  | 12.286163 |
| O  | 9.070973  | -0.925403 | 12.380726 |
| O  | 10.673633 | -1.952114 | 10.233498 |
| Ti | 9.015867  | -0.826340 | 10.510873 |
| Ti | 3.584642  | -4.232639 | 10.396674 |
| O  | 3.390320  | -3.833800 | 12.168727 |
| Ti | 3.446814  | -3.804354 | 14.084350 |
| Ti | 1.680220  | -7.662208 | 10.219755 |
| O  | 2.662911  | -5.754951 | 13.717409 |
| O  | 3.077255  | -8.372530 | 14.240520 |
| O  | 1.131611  | -7.806680 | 12.059613 |
| Ti | 1.441794  | -7.208039 | 13.814261 |
| O  | 2.777964  | -6.071475 | 9.979256  |
| Ti | 8.006805  | -8.051511 | 13.540069 |
| O  | 8.085397  | -8.876576 | 11.881329 |
| Ti | 8.237078  | -7.288818 | 10.701864 |
| O  | 8.148568  | -6.348346 | 12.538998 |
| O  | 6.722153  | -7.748696 | 9.506650  |
| O  | 6.179765  | -7.799575 | 14.204093 |
| O  | 5.201977  | -5.113449 | 14.418845 |
| Ti | 4.441122  | -6.929200 | 13.811520 |
| O  | 4.814279  | -7.220102 | 12.011497 |
| O  | 5.320642  | -5.403689 | 10.195510 |
| Ti | 4.758571  | -7.402769 | 10.124322 |
| O  | 3.288513  | -8.681842 | 10.131438 |
| O  | 4.913321  | -2.756918 | 9.978405  |
| O  | 4.841820  | -2.440453 | 14.256154 |
| Ti | 9.793094  | -5.510046 | 13.741761 |
| O  | 10.325530 | -4.763729 | 12.023577 |
| O  | 12.101004 | -4.434083 | 9.822792  |
| Ti | 10.306366 | -5.190980 | 10.157194 |
| O  | 10.071322 | -7.095934 | 10.208139 |
| O  | 9.804819  | -7.521823 | 14.206309 |
| O  | 8.314696  | -4.550814 | 14.567662 |
| Ti | 6.620994  | -3.664388 | 14.095996 |
| O  | 6.585191  | -3.724279 | 12.260952 |
| O  | 8.230223  | -5.204933 | 10.101953 |
| Ti | 6.742334  | -4.016273 | 10.376384 |
| Ti | -2.389381 | 1.674948  | 16.790669 |
| O  | -2.395568 | 1.125584  | 18.599296 |

|    |           |           |           |
|----|-----------|-----------|-----------|
| O  | -3.670399 | 0.447497  | 21.076186 |
| Ti | -2.152529 | 1.390369  | 20.441466 |
| O  | -1.718745 | 3.239354  | 20.573000 |
| O  | -2.263402 | 3.550792  | 16.720686 |
| O  | -0.784558 | 0.743633  | 16.256310 |
| Ti | 0.911057  | -0.138087 | 16.837420 |
| O  | 0.953314  | -0.059468 | 18.735253 |
| O  | -0.594389 | 0.688060  | 21.196348 |
| Ti | 0.990070  | -0.140647 | 20.585580 |
| O  | 2.682949  | -1.367388 | 21.027724 |
| O  | 2.630203  | -1.383901 | 16.717280 |
| Ti | -0.473396 | 4.221225  | 16.909866 |
| O  | -0.523643 | 5.289311  | 18.474592 |
| Ti | -0.171145 | 3.820914  | 19.678487 |
| O  | 0.056407  | 2.732934  | 18.133465 |
| O  | 1.352635  | 3.862515  | 20.748049 |
| O  | 1.417208  | 4.300718  | 16.257214 |
| O  | 2.303744  | 1.308920  | 16.431219 |
| Ti | 3.006875  | 3.195720  | 16.693532 |
| O  | 3.071139  | 3.263979  | 18.549605 |
| O  | 2.440045  | 1.236740  | 21.005573 |
| Ti | 3.057711  | 3.041848  | 20.421717 |
| O  | 4.524498  | 4.169666  | 20.994682 |
| O  | 4.895107  | 1.740210  | 20.118701 |
| O  | 4.851845  | 1.909695  | 16.771724 |
| O  | 4.438119  | 4.578167  | 16.180541 |
| O  | 6.340775  | 3.953094  | 18.407669 |
| Ti | 6.003481  | 3.387178  | 16.631254 |
| Ti | 5.973743  | 3.290449  | 20.127756 |
| Ti | 4.084696  | -0.075826 | 20.504105 |
| O  | 4.170780  | -0.424162 | 18.696660 |
| Ti | 4.107636  | -0.049761 | 16.833157 |
| Ti | -5.746635 | -4.187814 | 16.738745 |
| Ti | -5.268394 | -4.177685 | 19.507565 |
| O  | -5.843886 | -2.325965 | 16.362362 |
| Ti | -4.474601 | -1.005774 | 16.536806 |
| O  | -4.356957 | -0.786878 | 18.419954 |
| O  | -5.411230 | -2.557887 | 20.426879 |
| Ti | -4.065927 | -1.210039 | 20.233337 |
| O  | -4.163201 | -4.017603 | 17.967165 |
| O  | -4.079505 | 0.946577  | 16.060056 |
| O  | -2.914845 | -2.069102 | 16.166084 |
| Ti | -1.412845 | -3.301775 | 16.753078 |
| O  | -6.743545 | -4.492606 | 18.325158 |
| O  | -1.222964 | -2.516122 | 18.474530 |
| O  | -2.667043 | -2.258535 | 20.943936 |
| Ti | -1.159814 | -3.097811 | 20.220991 |
| Ti | -3.243971 | -6.741327 | 16.509603 |
| O  | -5.131987 | -5.970911 | 16.045851 |
| O  | -1.874157 | -4.886659 | 19.710598 |
| O  | -1.649433 | -7.278759 | 20.802425 |
| O  | -3.614892 | -7.206797 | 18.317718 |

|    |           |           |           |
|----|-----------|-----------|-----------|
| Ti | -3.019196 | -6.376968 | 19.873197 |
| O  | -4.627474 | -5.602780 | 20.545923 |
| O  | -2.190908 | -5.124709 | 16.364354 |
| O  | 1.306400  | -7.769871 | 15.893174 |
| O  | 1.522703  | -7.337413 | 20.778298 |
| O  | 0.397103  | -4.521128 | 20.880516 |
| Ti | -0.025516 | -6.343409 | 20.270698 |
| O  | 0.126204  | -6.507638 | 18.426526 |
| O  | 0.305697  | -4.600867 | 16.653048 |
| Ti | -0.142216 | -6.616893 | 16.546495 |
| O  | -1.674602 | -7.786740 | 16.420281 |
| O  | 0.072330  | -1.942847 | 16.330042 |
| O  | 0.243847  | -1.957020 | 21.045870 |
| O  | 3.391793  | -4.119553 | 21.242799 |
| Ti | 1.912188  | -3.191915 | 20.557139 |
| O  | 1.901411  | -3.268680 | 18.713646 |
| O  | 3.308381  | -4.356701 | 16.179567 |
| Ti | 1.798896  | -3.265499 | 16.779256 |
| O  | 5.870958  | -0.755160 | 16.381090 |
| Ti | 7.458314  | -1.825596 | 16.958946 |
| O  | 7.206620  | -1.273437 | 18.781701 |
| O  | 5.612976  | -0.555502 | 21.477475 |
| Ti | 7.065741  | -1.402563 | 20.638253 |
| O  | 8.662846  | -2.617507 | 21.242203 |
| O  | 9.194512  | -2.979301 | 16.743889 |
| O  | 7.622357  | 2.788274  | 20.884354 |
| O  | 7.785681  | 2.625829  | 16.196266 |
| O  | 8.866952  | -0.346444 | 16.452544 |
| Ti | 9.389855  | 1.602389  | 16.636254 |
| O  | 9.195176  | 1.774268  | 18.483005 |
| O  | 8.570290  | -0.027926 | 21.008276 |
| Ti | 9.118184  | 1.741073  | 20.381937 |
| O  | 10.692362 | 2.854007  | 20.778692 |
| O  | 10.970104 | 0.316571  | 20.134391 |
| O  | 11.260519 | 0.363753  | 16.635465 |
| O  | 10.791491 | 2.997627  | 16.024437 |
| O  | 12.561484 | 2.543273  | 18.166612 |
| Ti | 12.389248 | 1.891180  | 16.420660 |
| O  | 14.038562 | 0.918042  | 15.805053 |
| Ti | 12.000369 | 1.882958  | 19.860055 |
| O  | 13.667780 | 1.140228  | 20.328688 |
| Ti | 14.030475 | -0.482198 | 19.452080 |
| Ti | 14.248063 | -0.872249 | 16.621883 |
| O  | 14.251725 | -1.812395 | 20.710902 |
| Ti | 13.065448 | -3.353332 | 20.699673 |
| O  | 13.907325 | -3.820755 | 19.033997 |
| O  | 15.059958 | -2.595877 | 16.459051 |
| Ti | 13.877900 | -3.845350 | 17.191639 |
| O  | 12.777033 | -1.028145 | 18.001721 |
| O  | 12.534145 | -5.092118 | 21.078187 |
| O  | 11.615224 | -2.350029 | 21.342389 |
| Ti | 10.135958 | -1.488211 | 20.543972 |

|    |           |           |           |
|----|-----------|-----------|-----------|
| O  | 15.320542 | -0.279788 | 18.108709 |
| O  | 10.319210 | -1.972553 | 18.792996 |
| O  | 12.206341 | -3.021650 | 16.494297 |
| Ti | 10.722946 | -1.639458 | 16.951198 |
| Ti | 5.113716  | -4.997837 | 16.728507 |
| O  | 4.910120  | -4.115839 | 18.403274 |
| Ti | 4.904928  | -4.544185 | 20.213562 |
| Ti | 3.213834  | -8.435636 | 16.354344 |
| O  | 4.198649  | -6.352184 | 19.602566 |
| O  | 4.539901  | -8.704709 | 20.719707 |
| O  | 2.702655  | -8.644727 | 18.189370 |
| Ti | 3.068702  | -7.866667 | 19.845754 |
| O  | 4.276699  | -6.825346 | 16.240989 |
| Ti | 9.152749  | -8.098483 | 19.216922 |
| O  | 9.612809  | -9.225381 | 17.811153 |
| Ti | 9.714903  | -7.919032 | 16.355318 |
| O  | 8.897181  | -6.659455 | 17.983661 |
| O  | 8.035876  | -8.743555 | 15.588239 |
| O  | 7.766033  | -8.337480 | 20.452390 |
| O  | 6.526700  | -5.823366 | 20.753687 |
| Ti | 6.014994  | -7.652296 | 20.065442 |
| O  | 6.164626  | -8.037697 | 18.240190 |
| O  | 6.791856  | -6.182724 | 16.537272 |
| Ti | 6.227549  | -8.202615 | 16.332408 |
| O  | 4.795276  | -9.493911 | 16.232476 |
| O  | 6.521737  | -3.555159 | 16.369341 |
| O  | 6.209784  | -3.212883 | 20.892678 |
| Ti | 11.149584 | -5.871775 | 19.992499 |
| O  | 11.626667 | -5.402074 | 18.226715 |
| O  | 13.831763 | -5.454433 | 16.291290 |
| Ti | 11.948613 | -5.907705 | 16.359261 |
| O  | 11.662485 | -7.746793 | 16.322381 |
| O  | 10.785599 | -7.698495 | 20.102479 |
| O  | 9.617263  | -5.183544 | 20.840663 |
| Ti | 7.948744  | -4.392841 | 20.473683 |
| O  | 7.939115  | -4.233977 | 18.666549 |
| O  | 9.922547  | -5.757217 | 15.983017 |
| Ti | 8.319765  | -4.867786 | 16.826426 |

anatase-like 3-D (1,1,3)-mer

|    |           |          |           |
|----|-----------|----------|-----------|
| Ti | -6.953624 | 3.461274 | -1.969161 |
| O  | -7.596112 | 2.983164 | -0.234324 |
| O  | -9.646344 | 3.215586 | 1.599105  |
| Ti | -7.774081 | 3.652304 | 1.664064  |
| O  | -7.452976 | 5.479667 | 1.583189  |
| O  | -6.611104 | 5.281140 | -2.144009 |
| O  | -5.325972 | 2.727874 | -2.557955 |
| Ti | -3.627454 | 1.936412 | -2.361637 |
| O  | -3.503796 | 1.521807 | -0.555819 |
| O  | -5.710714 | 3.480739 | 1.918406  |
| Ti | -4.060849 | 2.588066 | 1.164493  |
| O  | -2.241603 | 1.336575 | 1.606681  |

|    |            |           |           |
|----|------------|-----------|-----------|
| O  | -1.858506  | 0.825703  | -2.883949 |
| Ti | -4.928487  | 5.668475  | -1.341334 |
| O  | -5.380885  | 6.833652  | 0.034508  |
| Ti | -5.498719  | 5.600875  | 1.544351  |
| O  | -4.658480  | 4.242642  | -0.092892 |
| O  | -3.837571  | 6.464494  | 2.290608  |
| O  | -3.568300  | 5.876652  | -2.612015 |
| O  | -2.290599  | 3.407389  | -2.634547 |
| Ti | -1.809051  | 5.302373  | -2.096816 |
| O  | -2.027748  | 5.877074  | -0.329348 |
| O  | -2.525161  | 3.912840  | 1.293310  |
| Ti | -1.993114  | 5.941539  | 1.576464  |
| O  | -0.573996  | 7.243893  | 1.704819  |
| O  | -0.051178  | 4.598638  | 1.681583  |
| O  | -0.033699  | 4.034424  | -1.501871 |
| O  | -0.332572  | 6.310268  | -2.797439 |
| O  | 1.506516   | 6.378380  | -0.250578 |
| Ti | 1.127065   | 5.517809  | -1.861637 |
| Ti | 1.021551   | 6.199331  | 1.598001  |
| Ti | -0.812268  | 2.739593  | 1.209530  |
| O  | -0.527805  | 1.705646  | -0.385335 |
| Ti | -0.595720  | 2.169436  | -2.177673 |
| Ti | -9.731778  | -1.800174 | -1.730121 |
| Ti | -9.957424  | -1.287381 | 1.075174  |
| O  | -9.995252  | -0.499325 | -3.031097 |
| Ti | -8.836946  | 1.035786  | -2.943458 |
| O  | -9.745873  | 1.613378  | -1.372786 |
| O  | -10.750911 | 0.434185  | 1.143245  |
| Ti | -9.537432  | 1.716725  | 0.480341  |
| O  | -8.483163  | -1.184329 | -0.316974 |
| O  | -8.184125  | 2.765660  | -3.249015 |
| O  | -7.320037  | 0.049728  | -3.470984 |
| Ti | -5.822133  | -0.812668 | -2.708329 |
| O  | -11.021988 | -1.972358 | -0.396956 |
| O  | -5.925808  | -0.338196 | -0.943645 |
| O  | -7.963486  | 0.767686  | 1.293644  |
| Ti | -6.464707  | -0.595681 | 0.878555  |
| Ti | -7.697098  | -4.173270 | -2.085867 |
| O  | -9.349920  | -3.430128 | -2.593998 |
| O  | -6.985880  | -2.588744 | 1.137438  |
| O  | -6.497739  | -5.204670 | 1.743896  |
| O  | -8.278419  | -4.822880 | -0.403872 |
| Ti | -8.110106  | -4.127591 | 1.327148  |
| O  | -9.731154  | -3.098982 | 1.900982  |
| O  | -6.659186  | -2.610610 | -2.314592 |
| O  | -3.259186  | -5.068460 | -2.995985 |
| O  | -3.474750  | -4.833522 | 1.640685  |
| O  | -4.588598  | -1.843084 | 1.389596  |
| Ti | -5.076351  | -3.793927 | 1.188827  |
| O  | -4.873851  | -4.025268 | -0.657427 |
| O  | -4.281937  | -2.289043 | -3.242203 |
| Ti | -4.796640  | -4.039909 | -2.547491 |

|    |           |           |           |
|----|-----------|-----------|-----------|
| O  | -6.359322 | -5.152125 | -2.963848 |
| O  | -4.302208 | 0.292663  | -3.370321 |
| O  | -5.011687 | 0.765103  | 1.227487  |
| O  | -1.609394 | -1.409214 | 1.465120  |
| Ti | -3.210957 | -0.341574 | 0.817335  |
| O  | -2.901812 | -1.186065 | -0.934703 |
| O  | -1.281440 | -1.822749 | -3.623847 |
| Ti | -2.744280 | -1.001900 | -2.761735 |
| O  | 0.907988  | 1.865705  | -3.255337 |
| Ti | 2.394257  | 0.903566  | -2.615086 |
| O  | 2.407129  | 0.957243  | -0.778097 |
| O  | 1.018284  | 2.196425  | 1.790481  |
| Ti | 2.455995  | 1.029818  | 1.169565  |
| O  | 4.190893  | -0.292415 | 1.595432  |
| O  | 4.071567  | -0.328910 | -3.108420 |
| O  | 2.926391  | 5.553622  | 2.077489  |
| O  | 2.653386  | 4.983749  | -2.809993 |
| O  | 3.893189  | 2.238432  | -2.942635 |
| Ti | 4.247160  | 4.060860  | -2.283053 |
| O  | 4.052259  | 4.259846  | -0.451142 |
| O  | 3.955900  | 2.345372  | 1.271706  |
| Ti | 4.358559  | 4.376301  | 1.429814  |
| O  | 5.870494  | 5.566915  | 1.548523  |
| O  | 6.412220  | 2.904052  | 1.601672  |
| O  | 6.083716  | 2.634776  | -1.661250 |
| O  | 5.860291  | 5.011551  | -2.805447 |
| O  | 7.828659  | 4.996198  | -0.327552 |
| Ti | 7.229303  | 4.126011  | -1.855377 |
| O  | 8.827500  | 3.340175  | -2.522504 |
| Ti | 7.442216  | 4.521524  | 1.478684  |
| O  | 9.322961  | 3.736378  | 1.934495  |
| Ti | 9.935892  | 1.893385  | 1.305867  |
| Ti | 9.460882  | 1.915291  | -1.468161 |
| O  | 10.046848 | 0.019395  | 1.573646  |
| Ti | 8.672458  | -1.304378 | 1.385970  |
| O  | 8.638401  | -1.535410 | -0.512291 |
| O  | 9.667144  | 0.320885  | -2.423573 |
| Ti | 8.352881  | -1.061567 | -2.299136 |
| O  | 8.334899  | 1.743002  | 0.055844  |
| O  | 8.197909  | -3.329744 | 1.695934  |
| O  | 7.156282  | -0.168300 | 1.757805  |
| Ti | 5.686114  | 1.070556  | 1.156245  |
| O  | 10.926222 | 2.231321  | -0.284308 |
| O  | 5.492528  | 0.197887  | -0.536799 |
| O  | 6.961305  | 0.017548  | -2.995251 |
| Ti | 5.450532  | 0.830113  | -2.260695 |
| Ti | 0.243838  | -2.210875 | -2.609843 |
| O  | 0.149747  | -1.806486 | -0.818059 |
| Ti | 0.122051  | -2.175397 | 1.050399  |
| Ti | -1.632051 | -5.565034 | -2.205953 |
| O  | -0.542486 | -4.159718 | 1.110684  |
| O  | -0.132817 | -6.826995 | 1.734866  |

|    |           |           |           |
|----|-----------|-----------|-----------|
| O  | -2.018035 | -6.251652 | -0.504831 |
| Ti | -1.703090 | -5.630881 | 1.264235  |
| O  | -0.525984 | -4.030627 | -2.119099 |
| Ti | 4.904580  | -6.622356 | 1.183703  |
| O  | 4.886351  | -7.579311 | -0.447509 |
| Ti | 4.614073  | -6.059213 | -1.621792 |
| O  | 4.597946  | -4.966456 | -0.021023 |
| O  | 3.074721  | -6.037910 | -2.640377 |
| O  | 2.981638  | -6.462838 | 1.687162  |
| O  | 1.979354  | -3.554511 | 1.473941  |
| Ti | 1.308868  | -5.455003 | 1.254159  |
| O  | 1.309048  | -5.588888 | -0.592958 |
| O  | 1.881225  | -3.520595 | -3.110238 |
| Ti | 1.285196  | -5.306052 | -2.458998 |
| O  | -0.156990 | -6.426514 | -3.074442 |
| O  | 1.642994  | -0.915297 | -3.127933 |
| O  | 1.625499  | -0.860960 | 1.197026  |
| Ti | 6.460342  | -4.002829 | 0.962044  |
| O  | 6.660777  | -3.317594 | -0.798931 |
| O  | 7.992250  | -2.683771 | -3.248496 |
| Ti | 6.485448  | -3.640406 | -2.628035 |
| O  | 6.106995  | -5.519731 | -2.625962 |
| O  | 6.670188  | -5.895058 | 1.346881  |
| O  | 5.038413  | -2.960973 | 1.709685  |
| Ti | 3.337817  | -2.077746 | 1.075969  |
| O  | 3.356238  | -2.278073 | -0.822416 |
| O  | 4.895088  | -2.989128 | -3.347121 |
| Ti | 3.334989  | -2.145903 | -2.672786 |
| Ti | -5.581518 | 3.226813  | 4.239223  |
| O  | -6.158806 | 2.405349  | 5.978033  |
| O  | -7.761177 | 2.392799  | 8.127804  |
| Ti | -5.940117 | 3.061816  | 7.923712  |
| O  | -5.756562 | 4.957423  | 7.746261  |
| O  | -5.620785 | 5.240661  | 3.690057  |
| O  | -4.072077 | 2.339806  | 3.394024  |
| Ti | -2.363057 | 1.404171  | 3.825263  |
| O  | -2.259899 | 1.507043  | 5.649523  |
| O  | -3.890031 | 3.063590  | 7.645855  |
| Ti | -2.447417 | 1.799462  | 7.544229  |
| O  | -0.611780 | 0.513876  | 7.912918  |
| O  | -0.575735 | 0.194264  | 3.639293  |
| Ti | -3.815292 | 5.803464  | 4.321537  |
| O  | -3.834988 | 6.682513  | 5.950715  |
| Ti | -3.935857 | 5.131918  | 7.185213  |
| O  | -4.000748 | 4.124956  | 5.363676  |
| O  | -2.414451 | 5.628340  | 8.353608  |
| O  | -1.991679 | 5.485938  | 3.678130  |
| O  | -0.944856 | 2.871597  | 3.498444  |
| Ti | -0.220559 | 4.690156  | 4.132150  |
| O  | -0.612184 | 5.044508  | 5.912827  |
| O  | -1.015470 | 3.195142  | 7.731389  |
| Ti | -0.406533 | 5.196634  | 7.791335  |



|    |            |           |          |
|----|------------|-----------|----------|
| O  | 1.072625   | 6.446337  | 7.783602 |
| O  | 1.517808   | 3.848862  | 7.953251 |
| O  | 1.547147   | 3.526741  | 4.268270 |
| O  | 1.143165   | 6.129477  | 3.711081 |
| O  | 3.171079   | 5.563553  | 5.889131 |
| Ti | 2.786378   | 4.968069  | 4.155979 |
| Ti | 2.681294   | 5.393200  | 7.750662 |
| Ti | 0.697534   | 2.019187  | 7.536576 |
| O  | 0.907906   | 1.569352  | 5.772252 |
| Ti | 0.804317   | 1.556431  | 3.867165 |
| Ti | -9.036364  | -2.711093 | 3.960428 |
| Ti | -8.691181  | -2.266319 | 6.711497 |
| O  | -9.232023  | -0.924401 | 3.064791 |
| Ti | -7.886365  | 0.587995  | 3.407825 |
| O  | -8.464795  | 0.967686  | 5.135252 |
| O  | -8.852918  | -0.559696 | 7.305809 |
| Ti | -7.705251  | 1.008064  | 6.859809 |
| O  | -7.565882  | -2.304146 | 5.137437 |
| O  | -7.376708  | 2.551099  | 3.406743 |
| O  | -6.357887  | -0.540978 | 3.133925 |
| Ti | -4.721129  | -1.648424 | 3.672472 |
| O  | -10.117226 | -2.796364 | 5.484622 |
| O  | -4.814938  | -1.263757 | 5.480224 |
| O  | -6.228248  | -0.079049 | 7.625034 |
| Ti | -4.719734  | -1.397765 | 7.357039 |
| Ti | -6.464417  | -5.145885 | 3.894814 |
| O  | -8.357374  | -4.518691 | 3.405879 |
| O  | -5.496990  | -3.288802 | 7.405638 |
| O  | -5.068560  | -5.915467 | 8.016322 |
| O  | -7.037105  | -5.399420 | 5.738290 |
| Ti | -6.622560  | -4.835231 | 7.448015 |
| O  | -8.259431  | -3.612470 | 8.007273 |
| O  | -5.410090  | -3.551346 | 3.504061 |
| O  | -1.890053  | -6.111887 | 3.375604 |
| O  | -1.920411  | -5.655393 | 7.934709 |
| O  | -2.981633  | -2.680744 | 7.828683 |
| Ti | -3.572709  | -4.627809 | 7.546087 |
| O  | -3.379947  | -4.698373 | 5.712459 |
| O  | -2.944307  | -3.026552 | 3.614193 |
| Ti | -3.434257  | -4.983816 | 3.838521 |
| O  | -4.949283  | -6.229765 | 3.893029 |
| O  | -3.248869  | -0.361222 | 3.281658 |
| O  | -3.259975  | -0.057511 | 7.492334 |
| O  | 0.068584   | -2.273997 | 7.914222 |
| Ti | -1.534140  | -1.264297 | 7.363872 |
| O  | -1.435044  | -1.605172 | 5.557559 |
| O  | 0.161126   | -2.581113 | 3.184452 |
| Ti | -1.520641  | -1.654213 | 3.643880 |
| O  | 2.459889   | 0.688435  | 3.353094 |
| Ti | 4.122813   | -0.214943 | 3.872315 |
| O  | 4.033440   | 0.108353  | 5.688245 |
| O  | 2.477561   | 1.335586  | 8.105448 |

|    |           |           |          |
|----|-----------|-----------|----------|
| Ti | 4.043002  | 0.286990  | 7.583418 |
| O  | 5.796393  | -1.041101 | 7.956105 |
| O  | 5.860886  | -1.452713 | 3.891614 |
| O  | 4.584653  | 4.731737  | 8.230085 |
| O  | 4.394886  | 3.956438  | 3.557712 |
| O  | 5.581383  | 1.178695  | 3.453665 |
| Ti | 6.098139  | 3.067127  | 4.002236 |
| O  | 5.904165  | 3.229701  | 5.791033 |
| O  | 5.515422  | 1.606235  | 7.690694 |
| Ti | 6.140002  | 3.593077  | 7.689717 |
| O  | 7.765428  | 4.578408  | 7.497065 |
| O  | 8.049839  | 2.061087  | 8.037361 |
| O  | 8.000568  | 1.836347  | 4.028211 |
| O  | 7.518011  | 4.514663  | 3.600765 |
| O  | 9.745967  | 3.979261  | 5.604209 |
| Ti | 9.122171  | 3.392541  | 3.979126 |
| O  | 10.692702 | 2.122952  | 3.364145 |
| Ti | 9.356554  | 3.466260  | 7.496438 |
| O  | 11.262162 | 3.148233  | 8.328906 |
| Ti | 11.820126 | 1.306135  | 7.694263 |
| Ti | 11.119866 | 1.096462  | 4.936870 |
| O  | 11.643322 | -0.530780 | 8.014009 |
| Ti | 10.411546 | -2.009158 | 7.940013 |
| O  | 10.932970 | -2.697600 | 6.242974 |
| O  | 11.021650 | -0.650761 | 4.507057 |
| Ti | 10.197461 | -2.457624 | 4.548489 |
| O  | 10.103474 | 1.570232  | 6.550649 |
| O  | 9.591550  | -3.956538 | 8.050482 |
| O  | 8.837792  | -0.891269 | 8.081479 |
| Ti | 7.248026  | 0.295093  | 7.584196 |
| O  | 12.695042 | 1.415332  | 6.019407 |
| O  | 7.557105  | -0.129522 | 5.799015 |
| O  | 8.783350  | -1.450837 | 3.506717 |
| Ti | 7.328441  | -0.139588 | 3.937224 |
| Ti | 1.837301  | -3.391513 | 3.803363 |
| O  | 1.700275  | -3.136171 | 5.605138 |
| Ti | 1.793316  | -3.068499 | 7.504080 |
| Ti | -0.035937 | -6.861853 | 3.878642 |
| O  | 1.092177  | -5.070146 | 7.308055 |
| O  | 1.444648  | -7.636218 | 7.968136 |
| O  | -0.501061 | -7.072929 | 5.718207 |
| Ti | -0.177346 | -6.473611 | 7.488035 |
| O  | 1.097566  | -5.284890 | 3.582350 |
| Ti | 6.632233  | -7.125852 | 7.449456 |
| O  | 6.693340  | -8.032439 | 5.798100 |
| Ti | 6.518398  | -6.591068 | 4.472764 |
| O  | 6.429662  | -5.484989 | 6.142705 |
| O  | 5.031103  | -7.117613 | 3.261728 |
| O  | 4.706870  | -7.038373 | 7.929958 |
| O  | 3.585363  | -4.370192 | 7.883777 |
| Ti | 2.877912  | -6.264910 | 7.483449 |
| O  | 3.278898  | -6.652005 | 5.692391 |

|    |           |           |           |
|----|-----------|-----------|-----------|
| O  | 3.575227  | -4.673410 | 3.744568  |
| Ti | 3.026095  | -6.634602 | 3.831770  |
| O  | 1.562535  | -7.903060 | 3.814650  |
| O  | 3.241319  | -2.018755 | 3.413899  |
| O  | 3.149765  | -1.635888 | 7.618760  |
| Ti | 8.003766  | -4.398204 | 6.957095  |
| O  | 8.489619  | -3.627768 | 5.239140  |
| O  | 10.365811 | -3.927149 | 3.346471  |
| Ti | 8.538185  | -4.532716 | 3.372969  |
| O  | 8.329330  | -6.363374 | 3.853062  |
| O  | 8.371266  | -6.235065 | 7.791349  |
| O  | 6.704045  | -3.609698 | 8.112885  |
| Ti | 4.881377  | -2.823986 | 7.570034  |
| O  | 4.993680  | -3.080636 | 5.752714  |
| O  | 6.475373  | -4.530236 | 3.479877  |
| Ti | 5.009079  | -3.292553 | 3.863337  |
| Ti | -3.869813 | 2.417508  | 10.743065 |
| O  | -4.248211 | 1.657517  | 12.463256 |
| O  | -5.857583 | 1.746013  | 14.495253 |
| Ti | -4.027945 | 2.451536  | 14.629176 |
| O  | -3.920843 | 4.299177  | 14.084592 |
| O  | -4.099499 | 4.262852  | 10.133243 |
| O  | -2.535926 | 1.466351  | 9.681878  |
| Ti | -0.766451 | 0.631974  | 10.161390 |
| O  | -0.662770 | 0.589743  | 11.982430 |
| O  | -2.141620 | 2.317086  | 13.886160 |
| Ti | -0.797957 | 0.957765  | 13.853298 |
| O  | 1.046180  | -0.303659 | 14.266547 |
| O  | 1.005600  | -0.593899 | 10.006429 |
| Ti | -2.346519 | 5.013936  | 10.406070 |
| O  | -2.318771 | 5.929576  | 12.043173 |
| Ti | -2.196729 | 4.412916  | 13.281948 |
| O  | -2.099245 | 3.348626  | 11.539286 |
| O  | -0.803578 | 4.830733  | 14.637487 |
| O  | -0.407928 | 4.935275  | 9.866882  |
| O  | 0.583750  | 2.147523  | 9.869679  |
| Ti | 1.312232  | 4.014399  | 10.360436 |
| O  | 0.966001  | 4.326236  | 12.170213 |
| O  | 0.635697  | 2.364717  | 14.014662 |
| Ti | 1.203202  | 4.356362  | 14.055086 |
| O  | 2.662642  | 5.609998  | 14.083276 |
| O  | 3.139565  | 3.038732  | 14.250219 |
| O  | 3.101020  | 2.801230  | 10.460754 |
| O  | 2.761595  | 5.383361  | 9.869037  |
| O  | 4.704744  | 4.784012  | 12.114562 |
| Ti | 4.375872  | 4.199679  | 10.339200 |
| Ti | 4.305654  | 4.584701  | 13.976027 |
| Ti | 2.358682  | 1.184723  | 13.871124 |
| O  | 2.535100  | 0.858016  | 12.085424 |
| Ti | 2.349456  | 0.815745  | 10.191267 |
| Ti | -7.555764 | -3.468182 | 10.074213 |
| Ti | -6.813083 | -3.196554 | 12.803321 |

|    |           |           |           |
|----|-----------|-----------|-----------|
| O  | -7.307300 | -1.666634 | 9.666221  |
| Ti | -6.156385 | -0.097554 | 9.761428  |
| O  | -6.612659 | 0.552855  | 11.462066 |
| O  | -6.639663 | -1.451241 | 13.168528 |
| Ti | -5.762766 | 0.414065  | 13.155863 |
| O  | -5.835660 | -3.784337 | 11.193867 |
| O  | -5.400409 | 1.843276  | 9.508466  |
| O  | -4.587922 | -1.209014 | 9.595036  |
| Ti | -3.092613 | -2.482383 | 10.121152 |
| O  | -8.421337 | -3.483969 | 11.736043 |
| O  | -3.299064 | -2.175455 | 11.928535 |
| O  | -4.478596 | -0.829495 | 14.108962 |
| Ti | -3.069540 | -2.243035 | 13.799141 |
| Ti | -5.160804 | -5.703158 | 10.258391 |
| O  | -7.050027 | -5.330401 | 9.436788  |
| O  | -3.868734 | -4.152537 | 13.723658 |
| O  | -3.439247 | -6.762270 | 14.354350 |
| O  | -5.560654 | -6.291644 | 12.113479 |
| Ti | -5.010074 | -5.721476 | 13.768654 |
| O  | -6.585751 | -4.392328 | 14.313983 |
| O  | -3.830643 | -4.295766 | 9.720138  |
| O  | -0.364439 | -6.948152 | 9.605982  |
| O  | -0.293925 | -6.418233 | 14.248856 |
| O  | -1.326872 | -3.514227 | 14.201039 |
| Ti | -1.981074 | -5.436285 | 13.830705 |
| O  | -1.756283 | -5.589561 | 12.022928 |
| O  | -1.340189 | -3.843687 | 10.045791 |
| Ti | -1.954295 | -5.808575 | 10.122922 |
| O  | -3.579148 | -6.821066 | 10.237181 |
| O  | -1.619131 | -1.180615 | 9.714764  |
| O  | -1.608769 | -0.908963 | 13.877837 |
| O  | 1.769682  | -3.010613 | 14.359367 |
| Ti | 0.125848  | -2.099112 | 13.780682 |
| O  | 0.247849  | -2.451403 | 11.981534 |
| O  | 1.718110  | -3.514206 | 9.593643  |
| Ti | 0.106643  | -2.491288 | 10.087719 |
| O  | 4.046150  | -0.031367 | 9.726038  |
| Ti | 5.689260  | -0.943875 | 10.304838 |
| O  | 5.567893  | -0.590398 | 12.103974 |
| O  | 4.097713  | 0.471914  | 14.491541 |
| Ti | 5.709139  | -0.551114 | 13.997656 |
| O  | 7.435138  | -1.862089 | 14.370600 |
| O  | 7.424565  | -2.133420 | 10.207694 |
| O  | 6.181008  | 3.906455  | 14.480012 |
| O  | 6.109043  | 3.374915  | 9.836407  |
| O  | 7.141789  | 0.471450  | 9.884499  |
| Ti | 7.796441  | 2.392990  | 10.255064 |
| O  | 7.569947  | 2.547116  | 12.062678 |
| O  | 7.156297  | 0.801195  | 14.040318 |
| Ti | 7.769954  | 2.766099  | 13.962335 |
| O  | 9.394737  | 3.778464  | 13.847188 |
| O  | 9.646743  | 1.253573  | 14.365322 |

|    |           |           |           |
|----|-----------|-----------|-----------|
| O  | 9.683880  | 1.110199  | 10.363790 |
| O  | 9.254287  | 3.719373  | 9.731057  |
| O  | 11.376091 | 3.250007  | 11.971621 |
| Ti | 10.825482 | 2.679219  | 10.316862 |
| O  | 12.400548 | 1.349319  | 9.773006  |
| Ti | 10.976509 | 2.661050  | 13.826572 |
| O  | 12.866221 | 2.289247  | 14.647921 |
| Ti | 13.372087 | 0.427639  | 14.010430 |
| Ti | 12.628897 | 0.154986  | 11.281475 |
| O  | 13.124714 | -1.374109 | 14.418440 |
| Ti | 11.973648 | -2.942969 | 14.324339 |
| O  | 12.429347 | -3.593709 | 12.623726 |
| O  | 12.457344 | -1.590568 | 10.915966 |
| Ti | 11.580063 | -3.455465 | 10.929559 |
| O  | 11.651622 | 0.742115  | 12.891242 |
| O  | 11.217953 | -4.884042 | 14.577115 |
| O  | 10.404393 | -1.832785 | 14.491024 |
| Ti | 8.908342  | -0.559964 | 13.964802 |
| O  | 14.237286 | 0.443759  | 12.348278 |
| O  | 9.115157  | -0.867169 | 12.157532 |
| O  | 10.295280 | -2.212336 | 9.976876  |
| Ti | 8.885355  | -0.799673 | 10.286892 |
| Ti | 3.456989  | -4.227046 | 10.214156 |
| O  | 3.280289  | -3.900041 | 11.999808 |
| Ti | 3.466298  | -3.857857 | 13.894012 |
| Ti | 1.510861  | -7.627052 | 10.109549 |
| O  | 2.714546  | -5.843085 | 13.624766 |
| O  | 3.053786  | -8.425501 | 14.216142 |
| O  | 1.111395  | -7.825826 | 11.970803 |
| Ti | 1.439112  | -7.241582 | 13.746301 |
| O  | 2.676703  | -6.081156 | 9.835076  |
| Ti | 8.162960  | -8.054493 | 13.678937 |
| O  | 8.135474  | -8.970554 | 12.042094 |
| Ti | 8.013964  | -7.454229 | 10.803239 |
| O  | 7.916259  | -6.389687 | 12.546085 |
| O  | 6.620453  | -7.871774 | 9.448178  |
| O  | 6.223939  | -7.976952 | 14.218037 |
| O  | 5.232011  | -5.189956 | 14.215415 |
| Ti | 4.503419  | -7.056742 | 13.724706 |
| O  | 4.848857  | -7.368208 | 11.914846 |
| O  | 5.179818  | -5.406738 | 10.070440 |
| Ti | 4.613101  | -7.398506 | 10.029944 |
| O  | 3.154106  | -8.652034 | 10.001669 |
| O  | 4.769684  | -2.738987 | 9.818539  |
| O  | 4.810599  | -2.448604 | 14.078809 |
| Ti | 9.687598  | -5.458779 | 13.343102 |
| O  | 10.065765 | -4.699756 | 11.622481 |
| O  | 11.675185 | -4.787277 | 9.590381  |
| Ti | 9.845587  | -5.491835 | 9.456991  |
| O  | 9.738337  | -7.340676 | 10.000700 |
| O  | 9.916205  | -7.304256 | 13.952442 |
| O  | 8.352194  | -4.508247 | 14.403172 |

|    |           |           |           |
|----|-----------|-----------|-----------|
| Ti | 6.582633  | -3.674683 | 13.923490 |
| O  | 6.478237  | -3.631750 | 12.102556 |
| O  | 7.958953  | -5.358018 | 10.199277 |
| Ti | 6.614212  | -4.000008 | 10.231810 |
| Ti | -2.186706 | 1.357072  | 17.128353 |
| O  | -2.671942 | 0.585332  | 18.845849 |
| O  | -4.547661 | 0.884925  | 20.739066 |
| Ti | -2.719749 | 1.491996  | 20.712857 |
| O  | -2.512456 | 3.321041  | 20.232483 |
| O  | -2.554559 | 3.193719  | 16.294347 |
| O  | -0.887503 | 0.568462  | 15.972300 |
| Ti | 0.934778  | -0.218307 | 16.514832 |
| O  | 0.821658  | 0.036515  | 18.332374 |
| O  | -0.657922 | 1.488811  | 20.604173 |
| Ti | 0.806394  | 0.248439  | 20.221643 |
| O  | 2.574123  | -1.024910 | 20.671425 |
| O  | 2.666582  | -1.406478 | 16.466569 |
| Ti | -0.815528 | 4.085289  | 16.635955 |
| O  | -0.876449 | 4.991843  | 18.288166 |
| Ti | -0.701625 | 3.550028  | 19.612399 |
| O  | -0.612800 | 2.444286  | 17.942112 |
| O  | 0.785238  | 4.076333  | 20.823035 |
| O  | 1.109914  | 3.997497  | 16.155472 |
| O  | 2.230601  | 1.327880  | 16.201805 |
| Ti | 2.938130  | 3.222795  | 16.601984 |
| O  | 2.536723  | 3.608580  | 18.393144 |
| O  | 2.240395  | 1.630264  | 20.340648 |
| Ti | 2.788285  | 3.591299  | 20.253621 |
| O  | 4.252856  | 4.860036  | 20.271056 |
| O  | 4.718412  | 2.241900  | 20.503402 |
| O  | 4.723897  | 2.027967  | 16.777720 |
| O  | 4.371337  | 4.594193  | 16.117653 |
| O  | 6.316762  | 4.030571  | 18.367513 |
| Ti | 5.993693  | 3.431411  | 16.597803 |
| Ti | 5.850978  | 3.819108  | 20.207360 |
| Ti | 3.977744  | 0.348806  | 20.282072 |
| O  | 4.114897  | 0.093270  | 18.480264 |
| Ti | 4.022846  | 0.026384  | 16.581346 |
| Ti | -6.003493 | -4.347942 | 16.390416 |
| Ti | -5.300771 | -4.138882 | 19.147624 |
| O  | -5.825845 | -2.511381 | 16.070174 |
| Ti | -4.594607 | -1.032407 | 16.145843 |
| O  | -5.116713 | -0.344844 | 17.842880 |
| O  | -5.201372 | -2.391765 | 19.577821 |
| Ti | -4.378723 | -0.583983 | 19.536565 |
| O  | -4.286194 | -4.613155 | 17.533222 |
| O  | -3.775013 | 0.915354  | 16.035644 |
| O  | -3.019935 | -2.148750 | 16.005263 |
| Ti | -1.432041 | -3.337554 | 16.501838 |
| O  | -6.877334 | -4.455383 | 18.066018 |
| O  | -1.742735 | -2.916969 | 18.287459 |
| O  | -2.964659 | -1.590367 | 20.578989 |

|    |           |           |           |
|----|-----------|-----------|-----------|
| Ti | -1.512028 | -2.904438 | 20.149207 |
| Ti | -3.539834 | -6.509542 | 16.588265 |
| O  | -5.446398 | -6.190053 | 15.756627 |
| O  | -2.183970 | -4.880596 | 20.057742 |
| O  | -1.701379 | -7.559324 | 20.484395 |
| O  | -3.929246 | -7.022526 | 18.480430 |
| Ti | -3.305238 | -6.436677 | 20.105925 |
| O  | -4.875068 | -5.165599 | 20.718737 |
| O  | -2.232209 | -5.104712 | 16.048362 |
| O  | 1.231500  | -7.773231 | 15.855482 |
| O  | 1.422262  | -6.999971 | 20.528091 |
| O  | 0.234714  | -4.222897 | 20.632794 |
| Ti | -0.281423 | -6.111387 | 20.083857 |
| O  | -0.087766 | -6.273302 | 18.294787 |
| O  | 0.301064  | -4.648729 | 16.394673 |
| Ti | -0.324605 | -6.635471 | 16.396268 |
| O  | -1.949519 | -7.622219 | 16.588519 |
| O  | 0.019481  | -2.001280 | 16.129538 |
| O  | -0.044939 | -1.591098 | 20.194035 |
| O  | 3.356212  | -3.731257 | 20.732398 |
| Ti | 1.691967  | -2.828948 | 20.213459 |
| O  | 1.782055  | -3.152224 | 18.397553 |
| O  | 3.339024  | -4.377006 | 15.980032 |
| Ti | 1.772978  | -3.329315 | 16.502179 |
| O  | 5.747844  | -0.767408 | 16.171180 |
| Ti | 7.350155  | -1.777928 | 16.721588 |
| O  | 7.250159  | -1.437977 | 18.527922 |
| O  | 5.654559  | -0.461273 | 20.900944 |
| Ti | 7.336251  | -1.388521 | 20.441703 |
| O  | 9.064486  | -2.681630 | 20.803827 |
| O  | 9.076155  | -2.984610 | 16.593516 |
| O  | 7.705762  | 3.069844  | 20.710127 |
| O  | 7.736673  | 2.614040  | 16.151045 |
| O  | 8.797574  | -0.361429 | 16.257019 |
| Ti | 9.388800  | 1.585906  | 16.539535 |
| O  | 9.195504  | 1.655785  | 18.372993 |
| O  | 8.759437  | -0.015893 | 20.471433 |
| Ti | 9.249516  | 1.941389  | 20.247038 |
| O  | 10.764432 | 3.187927  | 20.192076 |
| O  | 11.225416 | 0.509359  | 20.581409 |
| O  | 11.313060 | 0.247161  | 16.679682 |
| O  | 10.884722 | 2.873735  | 16.068688 |
| O  | 12.852569 | 2.357363  | 18.346837 |
| Ti | 12.438334 | 1.793537  | 16.637054 |
| O  | 14.075487 | 0.571558  | 16.076536 |
| Ti | 12.279445 | 2.104334  | 20.190565 |
| O  | 14.172521 | 1.477476  | 20.679234 |
| Ti | 14.852302 | -0.329302 | 20.124600 |
| Ti | 14.508207 | -0.774300 | 17.373384 |
| O  | 15.048861 | -2.116241 | 21.019703 |
| Ti | 13.703163 | -3.628156 | 20.677599 |
| O  | 14.281536 | -4.008110 | 18.950002 |

|    |           |           |           |
|----|-----------|-----------|-----------|
| O  | 14.671377 | -2.480901 | 16.779050 |
| Ti | 13.523270 | -4.047840 | 17.225150 |
| O  | 13.382682 | -0.737338 | 18.947347 |
| O  | 13.193904 | -5.591220 | 20.679049 |
| O  | 12.173914 | -2.500345 | 20.951734 |
| Ti | 10.536363 | -1.393507 | 20.413352 |
| O  | 15.933670 | -0.242981 | 18.600507 |
| O  | 10.630746 | -1.778488 | 18.605557 |
| O  | 12.045703 | -2.961178 | 16.460878 |
| Ti | 10.535655 | -1.644038 | 16.728902 |
| Ti | 5.118652  | -5.061277 | 16.548815 |
| O  | 4.908073  | -4.611874 | 18.313251 |
| Ti | 5.011826  | -4.599302 | 20.218321 |
| Ti | 3.134673  | -8.435027 | 16.334616 |
| O  | 4.269588  | -6.569596 | 19.816839 |
| O  | 4.674261  | -9.172457 | 20.373729 |
| O  | 2.645274  | -8.606371 | 18.195920 |
| Ti | 3.029992  | -8.011193 | 19.929169 |
| O  | 4.298146  | -6.890849 | 16.131987 |
| Ti | 9.633109  | -8.844111 | 19.762985 |
| O  | 9.652770  | -9.723136 | 18.134104 |
| Ti | 9.753242  | -8.172766 | 16.899021 |
| O  | 9.818361  | -7.165733 | 18.721016 |
| O  | 8.231088  | -8.669047 | 15.731614 |
| O  | 7.809316  | -8.527360 | 20.406543 |
| O  | 6.760650  | -5.914261 | 20.587097 |
| Ti | 6.037789  | -7.732835 | 19.953050 |
| O  | 6.428321  | -8.086814 | 18.172201 |
| O  | 6.831588  | -6.237173 | 16.353346 |
| Ti | 6.222805  | -8.238671 | 16.293513 |
| O  | 4.743464  | -9.488141 | 16.300918 |
| O  | 6.427774  | -3.556039 | 16.172158 |
| O  | 6.390577  | -3.237020 | 20.446099 |
| Ti | 11.398947 | -6.267468 | 19.846053 |
| O  | 11.976386 | -5.446382 | 18.107294 |
| O  | 13.578849 | -5.432911 | 15.957663 |
| Ti | 11.757860 | -6.102378 | 16.162119 |
| O  | 11.574014 | -7.997825 | 16.338626 |
| O  | 11.438623 | -8.281396 | 20.394667 |
| O  | 9.888527  | -5.381509 | 20.691177 |
| Ti | 8.179117  | -4.446663 | 20.259908 |
| O  | 8.075438  | -4.550095 | 18.435644 |
| O  | 9.707525  | -6.104042 | 16.439016 |
| Ti | 8.263678  | -4.841396 | 16.540859 |
| Ti | -0.642910 | 0.960393  | 23.125221 |
| O  | -0.843229 | 0.274067  | 24.885883 |
| O  | -2.174832 | -0.357104 | 27.335433 |
| Ti | -0.668651 | 0.598420  | 26.714274 |
| O  | -0.288635 | 2.477812  | 26.711014 |
| O  | -0.853826 | 2.852008  | 22.738397 |
| O  | 0.776918  | -0.082377 | 22.375696 |
| Ti | 2.477251  | -0.966105 | 23.009328 |



|    |           |           |           |
|----|-----------|-----------|-----------|
| O  | 2.459156  | -0.764758 | 24.908026 |
| O  | 0.921796  | -0.053013 | 27.433750 |
| Ti | 2.480810  | -0.895884 | 26.758117 |
| O  | 4.173149  | -2.127602 | 27.213134 |
| O  | 4.190103  | -2.182236 | 22.888360 |
| Ti | 0.910852  | 3.580816  | 22.901528 |
| O  | 0.929977  | 4.537484  | 24.533115 |
| Ti | 1.200749  | 3.017550  | 25.707015 |
| O  | 1.218103  | 1.924310  | 24.107483 |
| O  | 2.741972  | 2.996120  | 26.727169 |
| O  | 2.833914  | 3.419278  | 22.398354 |
| O  | 3.835698  | 0.511062  | 22.611213 |
| Ti | 4.506805  | 2.411535  | 22.830307 |
| O  | 4.505200  | 2.545559  | 24.680125 |
| O  | 3.934513  | 0.477975  | 27.196229 |
| Ti | 4.530491  | 2.263243  | 26.543432 |
| O  | 5.972178  | 3.384702  | 27.160205 |
| O  | 6.342376  | 0.988499  | 26.205713 |
| O  | 6.357941  | 1.117668  | 22.975184 |
| O  | 5.948129  | 3.784310  | 22.350904 |
| O  | 7.832980  | 3.209153  | 24.591544 |
| Ti | 7.518827  | 2.588388  | 22.821521 |
| Ti | 7.447583  | 2.522139  | 26.289193 |
| Ti | 5.572425  | -0.831313 | 26.695613 |
| O  | 5.665169  | -1.234852 | 24.903637 |
| Ti | 5.693381  | -0.867378 | 23.034901 |
| Ti | -4.117562 | -4.935985 | 22.778121 |
| Ti | -3.642129 | -4.957649 | 25.551901 |
| O  | -4.229085 | -3.061773 | 22.511206 |
| Ti | -2.855392 | -1.737293 | 22.699931 |
| O  | -2.821405 | -1.505874 | 24.598153 |
| O  | -3.849265 | -3.363418 | 26.507478 |
| Ti | -2.535478 | -1.980540 | 26.384416 |
| O  | -2.515743 | -4.785430 | 24.027868 |
| O  | -2.380486 | 0.287862  | 22.390237 |
| O  | -1.340533 | -2.875527 | 22.328368 |
| Ti | 0.128732  | -4.114832 | 22.930228 |
| O  | -5.107468 | -5.273909 | 24.368663 |
| O  | 0.323193  | -3.239899 | 24.624263 |
| O  | -1.144530 | -3.060926 | 27.081640 |
| Ti | 0.365597  | -3.872824 | 26.344825 |
| Ti | -1.625291 | -7.566379 | 22.606590 |
| O  | -3.505411 | -6.780041 | 22.150937 |
| O  | -0.266091 | -5.676984 | 25.745239 |
| O  | -0.042532 | -8.053589 | 26.891726 |
| O  | -2.010696 | -8.040248 | 24.413260 |
| Ti | -1.411921 | -7.169086 | 25.940509 |
| O  | -3.009648 | -6.382822 | 26.606748 |
| O  | -0.595649 | -5.949083 | 22.483725 |
| O  | 2.891140  | -8.596748 | 22.007611 |
| O  | 3.165315  | -8.025201 | 26.894689 |
| O  | 1.923036  | -5.281040 | 27.028159 |

|    |           |           |           |
|----|-----------|-----------|-----------|
| Ti | 1.570617  | -7.103627 | 26.368480 |
| O  | 1.765270  | -7.303426 | 24.536602 |
| O  | 1.860126  | -5.388877 | 22.814542 |
| Ti | 1.457933  | -7.419972 | 22.655714 |
| O  | -0.053038 | -8.611237 | 22.536820 |
| O  | 1.624373  | -2.751390 | 22.490349 |
| O  | 1.744630  | -2.713544 | 27.193988 |
| O  | 4.908362  | -4.908901 | 27.339622 |
| Ti | 3.422215  | -3.946393 | 26.700061 |
| O  | 3.408799  | -4.000134 | 24.863440 |
| O  | 4.797854  | -5.239614 | 22.295055 |
| Ti | 3.359485  | -4.073105 | 22.915592 |
| O  | 7.424918  | -1.633536 | 22.620424 |
| Ti | 9.026581  | -2.700897 | 23.268008 |
| O  | 8.717299  | -1.856557 | 25.020131 |
| O  | 7.097219  | -1.219923 | 27.709316 |
| Ti | 8.559982  | -2.040520 | 26.847056 |
| O  | 10.118231 | -3.334854 | 27.455800 |
| O  | 10.827864 | -3.807256 | 22.857892 |
| O  | 9.074692  | 2.027044  | 27.082375 |
| O  | 9.290467  | 1.791516  | 22.444816 |
| O  | 10.403812 | -1.199081 | 22.695800 |
| Ti | 10.891909 | 0.752115  | 22.896615 |
| O  | 10.688649 | 0.983291  | 24.742980 |
| O  | 10.096971 | -0.752975 | 27.327882 |
| Ti | 10.611756 | 0.997926  | 26.632589 |
| O  | 12.174173 | 2.110788  | 27.049074 |
| O  | 12.474360 | -0.430680 | 26.400684 |
| O  | 12.801179 | -0.452695 | 22.947973 |
| O  | 12.312945 | 2.163200  | 22.341455 |
| O  | 14.093235 | 1.781595  | 24.489490 |
| Ti | 13.925123 | 1.086782  | 22.758370 |
| O  | 15.546148 | 0.056367  | 22.182480 |
| Ti | 13.511815 | 1.132170  | 26.171307 |
| O  | 15.165253 | 0.389942  | 26.680347 |
| Ti | 15.547616 | -1.239952 | 25.815240 |
| Ti | 15.772213 | -1.753659 | 23.010175 |
| O  | 15.812180 | -2.540998 | 27.116466 |
| Ti | 14.653975 | -4.076131 | 27.029011 |
| O  | 15.562345 | -4.654820 | 25.458375 |
| O  | 16.568019 | -3.474518 | 22.943086 |
| Ti | 15.354534 | -4.757458 | 23.605300 |
| O  | 14.298601 | -1.856289 | 24.403324 |
| O  | 14.001008 | -5.806051 | 27.334034 |
| O  | 13.136400 | -3.090839 | 27.556110 |
| Ti | 11.638046 | -2.229135 | 26.794040 |
| O  | 16.837127 | -1.067504 | 24.481868 |
| O  | 11.741257 | -2.703258 | 25.029109 |
| O  | 13.781410 | -3.806383 | 22.791988 |
| Ti | 12.280342 | -2.445523 | 23.207025 |
| Ti | 6.628244  | -5.781991 | 22.876422 |
| O  | 6.343898  | -4.745826 | 24.470444 |

|    |           |            |           |
|----|-----------|------------|-----------|
| Ti | 6.412305  | -5.211760  | 26.261291 |
| Ti | 4.795908  | -9.242383  | 22.486755 |
| O  | 5.851686  | -7.076668  | 25.583578 |
| O  | 6.150336  | -9.351005  | 26.882471 |
| O  | 4.311012  | -9.421746  | 24.335362 |
| Ti | 4.691002  | -8.559426  | 25.945383 |
| O  | 5.868132  | -7.641469  | 22.403288 |
| Ti | 10.747384 | -8.709815  | 25.426314 |
| O  | 11.199825 | -9.874828  | 24.050548 |
| Ti | 11.316424 | -8.642465  | 22.540477 |
| O  | 10.475849 | -7.284509  | 24.177322 |
| O  | 9.655637  | -9.505487  | 21.794097 |
| O  | 9.386519  | -8.918311  | 26.696438 |
| O  | 8.107191  | -6.449613  | 26.719001 |
| Ti | 7.627055  | -8.344527  | 26.180972 |
| O  | 7.845287  | -8.920380  | 24.413839 |
| O  | 8.342507  | -6.955138  | 22.792133 |
| Ti | 7.810548  | -8.983871  | 22.508181 |
| O  | 6.391953  | -10.286468 | 22.379592 |
| O  | 8.057890  | -4.379252  | 22.478478 |
| O  | 7.674717  | -3.868389  | 26.969244 |
| Ti | 12.771509 | -6.501612  | 26.054471 |
| O  | 13.413373 | -6.022397  | 24.319095 |
| O  | 15.463512 | -6.256069  | 22.485522 |
| Ti | 13.591622 | -6.693347  | 22.420764 |
| O  | 13.270754 | -8.520632  | 22.501293 |
| O  | 12.429802 | -8.321709  | 26.228755 |
| O  | 11.142860 | -5.769439  | 26.642323 |
| Ti | 9.443895  | -4.978502  | 26.446652 |
| O  | 9.320323  | -4.563932  | 24.640864 |
| O  | 11.528066 | -6.521743  | 22.166683 |
| Ti | 9.877482  | -5.630367  | 22.920389 |

anatase-like 3-D (1,1,4)-mer

|    |           |          |           |
|----|-----------|----------|-----------|
| Ti | -7.020669 | 3.453832 | -2.232879 |
| O  | -7.656533 | 2.996077 | -0.497057 |
| O  | -9.714749 | 3.207227 | 1.330222  |
| Ti | -7.847939 | 3.660390 | 1.418114  |
| O  | -7.579481 | 5.496535 | 1.348520  |
| O  | -6.745192 | 5.286445 | -2.424482 |
| O  | -5.375878 | 2.752394 | -2.846116 |
| Ti | -3.724933 | 1.901724 | -2.614029 |
| O  | -3.581558 | 1.554719 | -0.802075 |
| O  | -5.777085 | 3.552188 | 1.660709  |
| Ti | -4.121723 | 2.668101 | 0.908312  |
| O  | -2.283421 | 1.467317 | 1.337356  |
| O  | -1.935987 | 0.815806 | -3.141582 |
| Ti | -5.098191 | 5.721596 | -1.587238 |
| O  | -5.568227 | 6.878393 | -0.216864 |
| Ti | -5.626925 | 5.658684 | 1.309739  |
| O  | -4.768018 | 4.293249 | -0.376851 |
| O  | -3.963744 | 6.523660 | 2.028111  |

|    |            |           |           |
|----|------------|-----------|-----------|
| O  | -3.724933  | 5.895387  | -2.870311 |
| O  | -2.329081  | 3.378548  | -2.757702 |
| Ti | -2.038566  | 5.276941  | -2.248228 |
| O  | -2.245192  | 6.085760  | -0.564369 |
| O  | -2.605492  | 4.004988  | 0.982989  |
| Ti | -2.087556  | 6.030828  | 1.330449  |
| O  | -0.666948  | 7.365197  | 1.434523  |
| O  | -0.173124  | 4.733635  | 1.504847  |
| O  | -0.309131  | 3.915105  | -1.171858 |
| O  | -0.438453  | 5.985798  | -2.969375 |
| O  | 1.404513   | 6.369200  | -0.454082 |
| Ti | 0.938493   | 5.268456  | -1.868241 |
| Ti | 0.915428   | 6.327516  | 1.414791  |
| Ti | -0.851958  | 2.868031  | 0.800366  |
| O  | -0.564828  | 1.439560  | -0.582144 |
| Ti | -0.699279  | 2.078300  | -2.290913 |
| Ti | -9.754476  | -1.831244 | -1.956440 |
| Ti | -9.995112  | -1.298915 | 0.838987  |
| O  | -10.018923 | -0.549975 | -3.277312 |
| Ti | -8.869364  | 0.992363  | -3.197736 |
| O  | -9.773506  | 1.576322  | -1.632186 |
| O  | -10.783089 | 0.424187  | 0.893249  |
| Ti | -9.567564  | 1.702996  | 0.224002  |
| O  | -8.520912  | -1.187900 | -0.543439 |
| O  | -8.220382  | 2.719428  | -3.522776 |
| O  | -7.350624  | 0.002193  | -3.714772 |
| Ti | -5.875928  | -0.853359 | -2.908852 |
| O  | -11.053093 | -1.998577 | -0.633166 |
| O  | -5.983677  | -0.314041 | -1.166059 |
| O  | -7.978960  | 0.812867  | 1.060887  |
| Ti | -6.487287  | -0.560572 | 0.672651  |
| Ti | -7.720315  | -4.211378 | -2.276761 |
| O  | -9.370505  | -3.474780 | -2.801096 |
| O  | -7.012219  | -2.557169 | 0.929203  |
| O  | -6.500078  | -5.157844 | 1.568230  |
| O  | -8.290061  | -4.842025 | -0.590324 |
| Ti | -8.117470  | -4.109590 | 1.128263  |
| O  | -9.756553  | -3.090116 | 1.687218  |
| O  | -6.693054  | -2.643479 | -2.500423 |
| O  | -3.271510  | -5.124993 | -3.158839 |
| O  | -3.486147  | -4.783848 | 1.468801  |
| O  | -4.622067  | -1.782518 | 1.189544  |
| Ti | -5.084575  | -3.735396 | 1.014689  |
| O  | -4.872194  | -4.015777 | -0.833319 |
| O  | -4.312806  | -2.330167 | -3.421529 |
| Ti | -4.805698  | -4.080999 | -2.712979 |
| O  | -6.364149  | -5.188106 | -3.133531 |
| O  | -4.363560  | 0.249928  | -3.600554 |
| O  | -5.055650  | 0.826015  | 0.995172  |
| O  | -1.675941  | -1.354921 | 1.280957  |
| Ti | -3.243118  | -0.258263 | 0.621777  |
| O  | -2.948621  | -1.147596 | -1.129568 |

|    |           |           |           |
|----|-----------|-----------|-----------|
| O  | -1.329943 | -1.849754 | -3.810544 |
| Ti | -2.797528 | -1.027774 | -2.954478 |
| O  | 0.825493  | 1.953292  | -3.358110 |
| Ti | 2.320376  | 0.908326  | -2.823769 |
| O  | 2.395083  | 0.999657  | -0.997745 |
| O  | 0.938952  | 2.355858  | 1.520570  |
| Ti | 2.364790  | 1.156348  | 0.954911  |
| O  | 4.107592  | -0.165703 | 1.378045  |
| O  | 3.998896  | -0.344655 | -3.307479 |
| O  | 2.836801  | 5.688307  | 1.862071  |
| O  | 2.398208  | 4.701014  | -2.880909 |
| O  | 3.852302  | 2.191204  | -3.202407 |
| Ti | 4.142322  | 3.999688  | -2.475214 |
| O  | 3.995819  | 4.356103  | -0.656012 |
| O  | 3.864926  | 2.465600  | 1.035285  |
| Ti | 4.271907  | 4.511547  | 1.225058  |
| O  | 5.786080  | 5.712238  | 1.335293  |
| O  | 6.314641  | 3.041544  | 1.411147  |
| O  | 5.915354  | 2.634034  | -1.727155 |
| O  | 5.732039  | 4.940036  | -3.056511 |
| O  | 7.718717  | 5.043340  | -0.545588 |
| Ti | 7.084550  | 4.112338  | -2.019894 |
| O  | 8.644012  | 3.308337  | -2.723163 |
| Ti | 7.343215  | 4.650532  | 1.291819  |
| O  | 9.227295  | 3.846773  | 1.752146  |
| Ti | 9.811285  | 2.001386  | 1.140772  |
| Ti | 9.313438  | 1.920617  | -1.634069 |
| O  | 10.027497 | 0.123234  | 1.384996  |
| Ti | 8.623926  | -1.146984 | 1.192885  |
| O  | 8.655675  | -1.533095 | -0.687679 |
| O  | 9.548588  | 0.326294  | -2.577528 |
| Ti | 8.261167  | -1.087395 | -2.463831 |
| O  | 8.189655  | 1.773459  | -0.097963 |
| O  | 7.979775  | -3.139389 | 1.471946  |
| O  | 7.110295  | 0.006580  | 1.525430  |
| Ti | 5.603218  | 1.205990  | 0.914338  |
| O  | 10.765482 | 2.336807  | -0.477926 |
| O  | 5.425701  | 0.171682  | -0.717696 |
| O  | 6.883575  | 0.021438  | -3.170094 |
| Ti | 5.370703  | 0.810220  | -2.429501 |
| Ti | 0.195422  | -2.245770 | -2.806799 |
| O  | 0.119643  | -1.869994 | -1.015231 |
| Ti | 0.052398  | -2.107929 | 0.876763  |
| Ti | -1.645971 | -5.615261 | -2.364265 |
| O  | -0.573939 | -4.114585 | 0.932699  |
| O  | -0.135730 | -6.767978 | 1.584491  |
| O  | -2.026234 | -6.261359 | -0.654118 |
| Ti | -1.721546 | -5.593399 | 1.107835  |
| O  | -0.551990 | -4.071337 | -2.320228 |
| Ti | 5.003349  | -6.377109 | 1.163429  |
| O  | 5.078285  | -7.382778 | -0.444379 |
| Ti | 4.686412  | -5.982235 | -1.725655 |

|    |           |           |           |
|----|-----------|-----------|-----------|
| O  | 4.704182  | -4.782176 | -0.199899 |
| O  | 3.127696  | -6.009599 | -2.689950 |
| O  | 3.049850  | -6.242066 | 1.514074  |
| O  | 1.929703  | -3.452980 | 1.280126  |
| Ti | 1.284778  | -5.368528 | 1.109143  |
| O  | 1.305141  | -5.592222 | -0.737629 |
| O  | 1.845231  | -3.543982 | -3.295303 |
| Ti | 1.276678  | -5.325982 | -2.593811 |
| O  | -0.136665 | -6.475905 | -3.204483 |
| O  | 1.567035  | -0.908795 | -3.311710 |
| O  | 1.533073  | -0.752001 | 0.972067  |
| Ti | 6.315602  | -3.595076 | 0.552785  |
| O  | 6.499598  | -2.885055 | -1.196935 |
| O  | 7.954727  | -2.653007 | -3.558374 |
| Ti | 6.395635  | -3.522267 | -2.974242 |
| O  | 6.153676  | -5.404057 | -2.758396 |
| O  | 6.735113  | -5.435612 | 1.367831  |
| O  | 4.973234  | -2.779505 | 1.578905  |
| Ti | 3.226209  | -1.936436 | 0.884600  |
| O  | 3.325284  | -2.266549 | -1.012745 |
| O  | 4.776983  | -2.992736 | -3.691444 |
| Ti | 3.268627  | -2.145493 | -2.864460 |
| Ti | -5.644845 | 3.304177  | 4.010100  |
| O  | -6.187568 | 2.491855  | 5.755920  |
| O  | -7.772770 | 2.502632  | 7.898386  |
| Ti | -5.938220 | 3.161792  | 7.748796  |
| O  | -5.769171 | 5.056636  | 7.544938  |
| O  | -5.732826 | 5.315272  | 3.453932  |
| O  | -4.144201 | 2.431357  | 3.130510  |
| Ti | -2.419093 | 1.525905  | 3.553568  |
| O  | -2.326464 | 1.616420  | 5.385871  |
| O  | -3.917274 | 3.160046  | 7.364339  |
| Ti | -2.484730 | 1.874289  | 7.288323  |
| O  | -0.650310 | 0.591990  | 7.699753  |
| O  | -0.642781 | 0.302744  | 3.407755  |
| Ti | -3.927003 | 5.909101  | 4.068372  |
| O  | -3.937294 | 6.786999  | 5.697262  |
| Ti | -3.968880 | 5.230939  | 6.929097  |
| O  | -4.056853 | 4.225668  | 5.096743  |
| O  | -2.469264 | 5.714166  | 8.119312  |
| O  | -2.089109 | 5.654058  | 3.439690  |
| O  | -1.027989 | 2.997662  | 3.202496  |
| Ti | -0.335033 | 4.801264  | 3.884442  |
| O  | -0.715871 | 5.137118  | 5.675067  |
| O  | -1.060317 | 3.273284  | 7.502175  |
| Ti | -0.451238 | 5.268457  | 7.551202  |
| O  | 1.016445  | 6.526007  | 7.556807  |
| O  | 1.470028  | 3.928329  | 7.714815  |
| O  | 1.456107  | 3.660465  | 4.036140  |
| O  | 1.047304  | 6.264639  | 3.502047  |
| O  | 3.100222  | 5.677195  | 5.673661  |
| Ti | 2.689813  | 5.101317  | 3.944435  |

|    |            |           |          |
|----|------------|-----------|----------|
| Ti | 2.628703   | 5.472309  | 7.541715 |
| Ti | 0.653480   | 2.096266  | 7.307522 |
| O  | 0.816739   | 1.702554  | 5.522521 |
| Ti | 0.696364   | 1.710673  | 3.614794 |
| Ti | -9.052626  | -2.669385 | 3.734001 |
| Ti | -8.661326  | -2.201364 | 6.476937 |
| O  | -9.260285  | -0.891920 | 2.821250 |
| Ti | -7.933543  | 0.629390  | 3.189546 |
| O  | -8.481481  | 1.025317  | 4.913304 |
| O  | -8.802696  | -0.491697 | 7.043308 |
| Ti | -7.681007  | 1.120664  | 6.632685 |
| O  | -7.555857  | -2.277315 | 4.879041 |
| O  | -7.429003  | 2.601387  | 3.167242 |
| O  | -6.393027  | -0.483586 | 2.925700 |
| Ti | -4.756513  | -1.570276 | 3.496114 |
| O  | -10.111191 | -2.728101 | 5.267586 |
| O  | -4.865466  | -1.192893 | 5.298267 |
| O  | -6.233456  | 0.029626  | 7.456134 |
| Ti | -4.750116  | -1.315110 | 7.187788 |
| Ti | -6.491756  | -5.071327 | 3.726226 |
| O  | -8.389614  | -4.494062 | 3.199939 |
| O  | -5.518958  | -3.209894 | 7.209327 |
| O  | -5.088360  | -5.834609 | 7.839670 |
| O  | -7.066764  | -5.324836 | 5.564330 |
| Ti | -6.637826  | -4.758449 | 7.273114 |
| O  | -8.266393  | -3.516744 | 7.815278 |
| O  | -5.427165  | -3.485141 | 3.307618 |
| O  | -1.914978  | -6.049219 | 3.214823 |
| O  | -1.935116  | -5.576181 | 7.774074 |
| O  | -3.019458  | -2.598044 | 7.656328 |
| Ti | -3.587513  | -4.548519 | 7.379691 |
| O  | -3.370467  | -4.629004 | 5.543555 |
| O  | -2.981064  | -2.936740 | 3.446471 |
| Ti | -3.459595  | -4.898234 | 3.673869 |
| O  | -4.969123  | -6.148029 | 3.745211 |
| O  | -3.304829  | -0.267028 | 3.054184 |
| O  | -3.288438  | 0.019474  | 7.266785 |
| O  | 0.013727   | -2.233305 | 7.744332 |
| Ti | -1.563213  | -1.192603 | 7.192955 |
| O  | -1.463433  | -1.502028 | 5.374590 |
| O  | 0.094118   | -2.501544 | 2.997776 |
| Ti | -1.572414  | -1.543558 | 3.474671 |
| O  | 2.344399   | 0.811209  | 3.106856 |
| Ti | 4.006037   | -0.080162 | 3.664155 |
| O  | 3.914628   | 0.246902  | 5.478578 |
| O  | 2.406946   | 1.391756  | 7.898275 |
| Ti | 3.976633   | 0.342269  | 7.381497 |
| O  | 5.730364   | -0.971936 | 7.771642 |
| O  | 5.746953   | -1.319919 | 3.666756 |
| O  | 4.522196   | 4.824928  | 8.042898 |
| O  | 4.296480   | 4.079992  | 3.335472 |
| O  | 5.462972   | 1.309406  | 3.217772 |

|    |           |           |          |
|----|-----------|-----------|----------|
| Ti | 5.993539  | 3.188882  | 3.808830 |
| O  | 5.802462  | 3.364784  | 5.595425 |
| O  | 5.433419  | 1.682389  | 7.476675 |
| Ti | 6.065240  | 3.665913  | 7.508132 |
| O  | 7.687247  | 4.673908  | 7.326644 |
| O  | 7.920949  | 2.158028  | 7.877782 |
| O  | 7.870796  | 1.960776  | 3.841428 |
| O  | 7.429387  | 4.638610  | 3.405618 |
| O  | 9.647288  | 4.059890  | 5.438069 |
| Ti | 9.020941  | 3.503796  | 3.809514 |
| O  | 10.514165 | 2.149570  | 3.206931 |
| Ti | 9.256907  | 3.541898  | 7.336400 |
| O  | 11.161152 | 3.192917  | 8.145109 |
| Ti | 11.674520 | 1.329234  | 7.508638 |
| Ti | 10.882148 | 1.063307  | 4.775379 |
| O  | 11.538983 | -0.515101 | 7.806957 |
| Ti | 10.294677 | -1.977115 | 7.683675 |
| O  | 10.732163 | -2.719441 | 5.993992 |
| O  | 10.710519 | -0.673685 | 4.390191 |
| Ti | 9.882159  | -2.546298 | 4.319895 |
| O  | 9.927079  | 1.616549  | 6.415716 |
| O  | 9.486013  | -3.920366 | 7.914370 |
| O  | 8.723164  | -0.858726 | 7.854626 |
| Ti | 7.173475  | 0.376166  | 7.375975 |
| O  | 12.495546 | 1.397868  | 5.808624 |
| O  | 7.429447  | 0.002533  | 5.573011 |
| O  | 8.611392  | -1.371926 | 3.276713 |
| Ti | 7.201561  | -0.009198 | 3.706288 |
| Ti | 1.769786  | -3.287081 | 3.642291 |
| O  | 1.604132  | -3.070669 | 5.442814 |
| Ti | 1.748820  | -3.016376 | 7.342677 |
| Ti | -0.068996 | -6.779827 | 3.733130 |
| O  | 1.080527  | -5.025376 | 7.153930 |
| O  | 1.415072  | -7.586425 | 7.830899 |
| O  | -0.507381 | -7.019842 | 5.564459 |
| Ti | -0.197102 | -6.414266 | 7.346773 |
| O  | 1.043649  | -5.197898 | 3.416059 |
| Ti | 6.593569  | -7.147656 | 7.426481 |
| O  | 6.629210  | -8.072671 | 5.783338 |
| Ti | 6.404228  | -6.630419 | 4.467866 |
| O  | 6.319535  | -5.528205 | 6.159295 |
| O  | 4.999450  | -7.087599 | 3.108850 |
| O  | 4.634767  | -7.092510 | 7.849062 |
| O  | 3.546982  | -4.330325 | 7.724135 |
| Ti | 2.868709  | -6.239457 | 7.346318 |
| O  | 3.285212  | -6.552591 | 5.527696 |
| O  | 3.489544  | -4.555197 | 3.534011 |
| Ti | 2.992912  | -6.523786 | 3.674528 |
| O  | 1.560898  | -7.800704 | 3.633402 |
| O  | 3.125570  | -1.887461 | 3.215788 |
| O  | 3.083976  | -1.570914 | 7.476446 |
| Ti | 7.930811  | -4.403309 | 6.780784 |



|    |           |           |           |
|----|-----------|-----------|-----------|
| O  | 8.280405  | -3.703451 | 5.030189  |
| O  | 9.986622  | -3.985377 | 3.077633  |
| Ti | 8.159181  | -4.648516 | 2.985736  |
| O  | 8.102410  | -6.476264 | 3.635594  |
| O  | 8.350847  | -6.230301 | 7.683096  |
| O  | 6.634665  | -3.571535 | 7.932368  |
| Ti | 4.829422  | -2.772140 | 7.420547  |
| O  | 4.809268  | -2.854511 | 5.590374  |
| O  | 6.237937  | -4.567344 | 3.701647  |
| Ti | 4.925235  | -3.162108 | 3.723256  |
| Ti | -3.884616 | 2.466757  | 10.558852 |
| O  | -4.259933 | 1.695571  | 12.266234 |
| O  | -5.876602 | 1.851434  | 14.302279 |
| Ti | -4.053720 | 2.553160  | 14.475701 |
| O  | -3.967545 | 4.385174  | 13.851137 |
| O  | -4.147517 | 4.305234  | 9.915012  |
| O  | -2.592379 | 1.538625  | 9.431703  |
| Ti | -0.820601 | 0.730907  | 9.967937  |
| O  | -0.773961 | 0.668126  | 11.791733 |
| O  | -2.186617 | 2.408307  | 13.689894 |
| Ti | -0.887000 | 1.002185  | 13.678338 |
| O  | 0.959008  | -0.260779 | 14.076525 |
| O  | 0.946744  | -0.504112 | 9.821538  |
| Ti | -2.405171 | 5.081138  | 10.165028 |
| O  | -2.380042 | 5.999437  | 11.797002 |
| Ti | -2.248049 | 4.487791  | 13.048989 |
| O  | -2.127539 | 3.415724  | 11.309818 |
| O  | -0.864589 | 4.922966  | 14.405720 |
| O  | -0.461643 | 5.016108  | 9.628927  |
| O  | 0.523797  | 2.236346  | 9.658994  |
| Ti | 1.244302  | 4.098339  | 10.160944 |
| O  | 0.910514  | 4.395126  | 11.971049 |
| O  | 0.540790  | 2.432250  | 13.845454 |
| Ti | 1.153402  | 4.418218  | 13.861732 |
| O  | 2.614049  | 5.679312  | 13.887508 |
| O  | 3.054136  | 3.094581  | 14.076701 |
| O  | 3.034558  | 2.886940  | 10.252510 |
| O  | 2.690489  | 5.466026  | 9.665615  |
| O  | 4.633407  | 4.832201  | 11.947948 |
| Ti | 4.304900  | 4.292320  | 10.162054 |
| Ti | 4.237232  | 4.629707  | 13.821876 |
| Ti | 2.247054  | 1.252958  | 13.691212 |
| O  | 2.420540  | 0.963648  | 11.893865 |
| Ti | 2.300503  | 0.906004  | 9.996881  |
| Ti | -7.585021 | -3.370914 | 9.895782  |
| Ti | -6.851424 | -3.115688 | 12.636335 |
| O  | -7.349373 | -1.568871 | 9.488905  |
| Ti | -6.190977 | -0.008231 | 9.591366  |
| O  | -6.636603 | 0.632165  | 11.292078 |
| O  | -6.680815 | -1.370504 | 12.986565 |
| Ti | -5.773535 | 0.490706  | 12.989298 |
| O  | -5.871401 | -3.691407 | 11.017226 |

|    |           |           |           |
|----|-----------|-----------|-----------|
| O  | -5.433476 | 1.930201  | 9.313817  |
| O  | -4.621610 | -1.125362 | 9.418746  |
| Ti | -3.131581 | -2.395950 | 9.967689  |
| O  | -8.457085 | -3.398003 | 11.554948 |
| O  | -3.351984 | -2.114342 | 11.774696 |
| O  | -4.538924 | -0.767636 | 13.979790 |
| Ti | -3.155044 | -2.196870 | 13.658127 |
| Ti | -5.200453 | -5.610332 | 10.098305 |
| O  | -7.080118 | -5.237145 | 9.257267  |
| O  | -3.918877 | -4.106903 | 13.573701 |
| O  | -3.505805 | -6.724660 | 14.173099 |
| O  | -5.624306 | -6.199833 | 11.946540 |
| Ti | -5.067511 | -5.663982 | 13.615521 |
| O  | -6.623506 | -4.303674 | 14.149784 |
| O  | -3.866951 | -4.209243 | 9.544573  |
| O  | -0.413118 | -6.887104 | 9.453810  |
| O  | -0.360572 | -6.443774 | 14.118774 |
| O  | -1.413377 | -3.484376 | 14.046631 |
| Ti | -2.017725 | -5.420463 | 13.677638 |
| O  | -1.767641 | -5.534932 | 11.864289 |
| O  | -1.386902 | -3.756624 | 9.889956  |
| Ti | -1.991974 | -5.717250 | 9.967800  |
| O  | -3.621712 | -6.727348 | 10.080397 |
| O  | -1.666464 | -1.093950 | 9.529545  |
| O  | -1.686465 | -0.864289 | 13.703948 |
| O  | 1.645265  | -3.059213 | 14.161769 |
| Ti | 0.034376  | -2.061521 | 13.618300 |
| O  | 0.196252  | -2.378606 | 11.811927 |
| O  | 1.676952  | -3.433405 | 9.436216  |
| Ti | 0.064672  | -2.396669 | 9.923345  |
| O  | 4.005630  | 0.071055  | 9.541687  |
| Ti | 5.631105  | -0.885662 | 10.101873 |
| O  | 5.463297  | -0.590318 | 11.905907 |
| O  | 3.988668  | 0.522545  | 14.280749 |
| Ti | 5.594094  | -0.506062 | 13.794345 |
| O  | 7.332908  | -1.815898 | 14.169597 |
| O  | 7.358038  | -2.095006 | 10.009503 |
| O  | 6.103920  | 3.967804  | 14.340872 |
| O  | 6.028277  | 3.455072  | 9.661660  |
| O  | 7.076538  | 0.528215  | 9.690131  |
| Ti | 7.699027  | 2.452991  | 10.099375 |
| O  | 7.487259  | 2.592549  | 11.907080 |
| O  | 7.035392  | 0.853396  | 13.839708 |
| Ti | 7.686308  | 2.821219  | 13.817101 |
| O  | 9.315716  | 3.834589  | 13.691296 |
| O  | 9.531688  | 1.314874  | 14.221643 |
| O  | 9.595978  | 1.162789  | 10.168353 |
| O  | 9.164939  | 3.779521  | 9.574284  |
| O  | 11.283827 | 3.255457  | 11.812866 |
| Ti | 10.732850 | 2.731107  | 10.141544 |
| O  | 12.287995 | 1.388220  | 9.586998  |
| Ti | 10.881194 | 2.697140  | 13.686862 |

|    |           |           |           |
|----|-----------|-----------|-----------|
| O  | 12.779736 | 2.328326  | 14.513215 |
| Ti | 13.282585 | 0.458777  | 13.875984 |
| Ti | 12.534882 | 0.231195  | 11.128943 |
| O  | 13.113292 | -1.378955 | 14.201446 |
| Ti | 11.889023 | -2.860578 | 14.070908 |
| O  | 12.364088 | -3.560772 | 12.373042 |
| O  | 12.379088 | -1.509425 | 10.742606 |
| Ti | 11.503784 | -3.380486 | 10.707833 |
| O  | 11.557928 | 0.776558  | 12.762555 |
| O  | 11.083676 | -4.794893 | 14.249490 |
| O  | 10.323255 | -1.715852 | 14.236455 |
| Ti | 8.782451  | -0.477577 | 13.756285 |
| O  | 14.137630 | 0.530159  | 12.202405 |
| O  | 8.990808  | -0.798875 | 11.948935 |
| O  | 10.248142 | -2.126927 | 9.738211  |
| Ti | 8.820469  | -0.751276 | 10.072427 |
| Ti | 3.400606  | -4.185941 | 10.047839 |
| O  | 3.238569  | -3.928464 | 11.842939 |
| Ti | 3.366247  | -3.867116 | 13.739838 |
| Ti | 1.444232  | -7.576795 | 9.991595  |
| O  | 2.657691  | -5.860662 | 13.506645 |
| O  | 2.987391  | -8.427855 | 14.131078 |
| O  | 1.043104  | -7.804233 | 11.849205 |
| Ti | 1.376793  | -7.255537 | 13.641395 |
| O  | 2.622710  | -6.039973 | 9.702218  |
| Ti | 8.166624  | -7.989660 | 13.712075 |
| O  | 8.197958  | -8.911885 | 12.079205 |
| Ti | 7.979262  | -7.462103 | 10.750490 |
| O  | 7.898570  | -6.368360 | 12.486111 |
| O  | 6.583010  | -7.893878 | 9.403109  |
| O  | 6.202747  | -7.928081 | 14.153410 |
| O  | 5.156445  | -5.180453 | 14.075105 |
| Ti | 4.444514  | -7.074882 | 13.641351 |
| O  | 4.823035  | -7.386214 | 11.830163 |
| O  | 5.120040  | -5.379996 | 9.904593  |
| Ti | 4.548327  | -7.362436 | 9.954724  |
| O  | 3.078817  | -8.610682 | 9.926126  |
| O  | 4.713048  | -2.695025 | 9.662099  |
| O  | 4.699665  | -2.424581 | 13.886799 |
| Ti | 9.510265  | -5.258151 | 13.117558 |
| O  | 9.886273  | -4.521885 | 11.397173 |
| O  | 11.572554 | -4.786910 | 9.439663  |
| Ti | 9.732306  | -5.461607 | 9.309748  |
| O  | 9.684375  | -7.305300 | 9.943030  |
| O  | 9.929990  | -7.093985 | 14.004626 |
| O  | 8.236096  | -4.422400 | 14.303678 |
| Ti | 6.441818  | -3.624653 | 13.766301 |
| O  | 6.463107  | -3.631771 | 11.941249 |
| O  | 7.825115  | -5.404440 | 10.079119 |
| Ti | 6.561032  | -3.961363 | 10.056656 |
| Ti | -2.239778 | 1.456304  | 16.989334 |
| O  | -2.614980 | 0.719353  | 18.709554 |

|    |           |           |           |
|----|-----------|-----------|-----------|
| O  | -4.301101 | 0.985306  | 20.667302 |
| Ti | -2.460874 | 1.660205  | 20.796970 |
| O  | -2.413382 | 3.503343  | 20.162220 |
| O  | -2.660229 | 3.291711  | 16.101584 |
| O  | -0.966381 | 0.619916  | 15.803049 |
| Ti | 0.827767  | -0.178109 | 16.340635 |
| O  | 0.805743  | -0.171050 | 18.165668 |
| O  | -0.553700 | 1.603047  | 20.027569 |
| Ti | 0.708917  | 0.158442  | 20.050180 |
| O  | 2.557198  | -1.108077 | 20.444520 |
| O  | 2.570219  | -1.377365 | 16.219641 |
| Ti | -0.897203 | 4.188299  | 16.393348 |
| O  | -0.927997 | 5.110398  | 18.026418 |
| Ti | -0.708265 | 3.660335  | 19.354752 |
| O  | -0.627856 | 2.566719  | 17.619348 |
| O  | 0.687327  | 4.091908  | 20.703034 |
| O  | 1.066602  | 4.126761  | 15.952069 |
| O  | 2.113050  | 1.378235  | 16.031645 |
| Ti | 2.824770  | 3.273099  | 16.464758 |
| O  | 2.445752  | 3.584363  | 18.275807 |
| O  | 2.150715  | 1.577030  | 20.201980 |
| Ti | 2.721747  | 3.559273  | 20.150926 |
| O  | 4.191524  | 4.807619  | 20.179303 |
| O  | 4.647421  | 2.236769  | 20.404399 |
| O  | 4.611486  | 2.058565  | 16.600034 |
| O  | 4.282278  | 4.625873  | 15.975245 |
| O  | 6.227217  | 4.001450  | 18.257030 |
| Ti | 5.893186  | 3.452889  | 16.465015 |
| Ti | 5.825861  | 3.773600  | 20.114654 |
| Ti | 3.869949  | 0.382462  | 20.058843 |
| O  | 4.031143  | 0.126218  | 18.263531 |
| Ti | 3.903397  | 0.065160  | 16.366696 |
| Ti | -6.012644 | -4.261423 | 16.231324 |
| Ti | -5.264239 | -4.033445 | 18.978192 |
| O  | -5.842684 | -2.423865 | 15.906331 |
| Ti | -4.618131 | -0.942273 | 16.037011 |
| O  | -5.093125 | -0.241061 | 17.734468 |
| O  | -5.107320 | -2.292870 | 19.364200 |
| Ti | -4.232317 | -0.421493 | 19.399520 |
| O  | -4.287780 | -4.579692 | 17.344670 |
| O  | -3.812807 | 0.992007  | 15.857008 |
| O  | -3.052738 | -2.086997 | 15.871375 |
| Ti | -1.512187 | -3.325734 | 16.351079 |
| O  | -6.867494 | -4.332251 | 17.905453 |
| O  | -1.720711 | -3.004044 | 18.158316 |
| O  | -2.976794 | -1.675068 | 20.369290 |
| Ti | -1.549877 | -3.051615 | 20.034845 |
| Ti | -3.611388 | -6.500282 | 16.420451 |
| O  | -5.509563 | -6.131336 | 15.594506 |
| O  | -2.325831 | -4.965460 | 19.938855 |
| O  | -1.895096 | -7.582384 | 20.532439 |
| O  | -4.013840 | -7.058784 | 18.294554 |

|    |           |           |           |
|----|-----------|-----------|-----------|
| Ti | -3.462759 | -6.533708 | 19.965655 |
| O  | -5.018085 | -5.190285 | 20.519355 |
| O  | -2.261779 | -5.117910 | 15.885499 |
| O  | 1.165898  | -7.770507 | 15.765581 |
| O  | 1.241598  | -7.258280 | 20.444574 |
| O  | 0.193947  | -4.331281 | 20.416495 |
| Ti | -0.428971 | -6.255854 | 20.007258 |
| O  | -0.217586 | -6.395107 | 18.199601 |
| O  | 0.235011  | -4.656282 | 16.267030 |
| Ti | -0.416417 | -6.624206 | 16.289500 |
| O  | -2.045533 | -7.637688 | 16.415543 |
| O  | -0.063001 | -1.986941 | 15.937251 |
| O  | -0.087191 | -1.708136 | 20.097661 |
| O  | 3.265657  | -3.873763 | 20.565152 |
| Ti | 1.639776  | -2.917828 | 20.004850 |
| O  | 1.807274  | -3.212154 | 18.200560 |
| O  | 3.281428  | -4.324405 | 15.825831 |
| Ti | 1.675740  | -3.296397 | 16.312279 |
| O  | 5.624638  | -0.742258 | 15.944846 |
| Ti | 7.234670  | -1.740698 | 16.488666 |
| O  | 7.072716  | -1.424175 | 18.294956 |
| O  | 5.593076  | -0.370947 | 20.670039 |
| Ti | 7.205696  | -1.408274 | 20.183546 |
| O  | 8.936961  | -2.710714 | 20.577439 |
| O  | 8.955721  | -2.938127 | 16.403398 |
| O  | 7.682680  | 3.083527  | 20.653080 |
| O  | 7.630512  | 2.641611  | 15.987797 |
| O  | 8.683237  | -0.318512 | 16.060538 |
| Ti | 9.287328  | 1.617668  | 16.429425 |
| O  | 9.035880  | 1.731583  | 18.242621 |
| O  | 8.657427  | -0.048185 | 20.216744 |
| Ti | 9.260789  | 1.912650  | 20.138897 |
| O  | 10.890528 | 2.923147  | 20.026228 |
| O  | 11.136263 | 0.405266  | 20.562839 |
| O  | 11.188264 | 0.303782  | 16.534067 |
| O  | 10.775811 | 2.921487  | 15.934249 |
| O  | 12.894045 | 2.396308  | 18.161003 |
| Ti | 12.337203 | 1.860777  | 16.491919 |
| O  | 13.892467 | 0.499856  | 15.957937 |
| Ti | 12.469495 | 1.806814  | 20.009000 |
| O  | 14.349000 | 1.434265  | 20.850205 |
| Ti | 14.853994 | -0.432200 | 20.212182 |
| Ti | 14.119987 | -0.688011 | 17.471633 |
| O  | 14.618373 | -2.233590 | 20.621046 |
| Ti | 13.461409 | -3.795691 | 20.518277 |
| O  | 13.906312 | -4.434082 | 18.817116 |
| O  | 13.949211 | -2.433106 | 17.121984 |
| Ti | 13.042426 | -4.294452 | 17.119686 |
| O  | 13.139976 | -0.112604 | 19.091096 |
| O  | 12.706400 | -5.734427 | 20.797178 |
| O  | 11.890910 | -2.680593 | 20.690474 |
| Ti | 10.402236 | -1.408810 | 20.139863 |

|    |           |           |           |
|----|-----------|-----------|-----------|
| O  | 15.725744 | -0.405882 | 18.553181 |
| O  | 10.622561 | -1.689427 | 18.332793 |
| O  | 11.807963 | -3.036564 | 16.128017 |
| Ti | 10.424677 | -1.606347 | 16.449333 |
| Ti | 5.022365  | -5.055433 | 16.416081 |
| O  | 4.849481  | -4.767328 | 18.213601 |
| Ti | 4.970597  | -4.709686 | 20.110604 |
| Ti | 3.032531  | -8.432116 | 16.284463 |
| O  | 4.235167  | -6.689807 | 19.855323 |
| O  | 4.579157  | -9.269830 | 20.440516 |
| O  | 2.636849  | -8.634903 | 18.158507 |
| Ti | 2.964744  | -8.095357 | 19.944627 |
| O  | 4.215269  | -6.896821 | 16.029849 |
| Ti | 9.672392  | -8.885141 | 19.938149 |
| O  | 9.645110  | -9.802638 | 18.306136 |
| Ti | 9.516327  | -8.288761 | 17.056703 |
| O  | 9.396281  | -7.218325 | 18.797176 |
| O  | 8.133397  | -8.723862 | 15.699664 |
| O  | 7.729662  | -8.822329 | 20.476951 |
| O  | 6.746721  | -6.040609 | 20.448085 |
| Ti | 6.025283  | -7.901804 | 19.945323 |
| O  | 6.358109  | -8.196087 | 18.134805 |
| O  | 6.729956  | -6.234265 | 16.260747 |
| Ti | 6.115728  | -8.220383 | 16.243729 |
| O  | 4.655750  | -9.481843 | 16.218154 |
| O  | 6.310341  | -3.541386 | 16.030286 |
| O  | 6.324934  | -3.300221 | 20.285866 |
| Ti | 11.159251 | -6.274302 | 19.550800 |
| O  | 11.532318 | -5.502229 | 17.843491 |
| O  | 13.146343 | -5.654202 | 15.805433 |
| Ti | 11.324066 | -6.356316 | 15.630820 |
| O  | 11.236141 | -8.188165 | 16.254692 |
| O  | 11.417398 | -8.114601 | 20.185548 |
| O  | 9.863834  | -5.344520 | 20.674673 |
| Ti | 8.092629  | -4.536522 | 20.138861 |
| O  | 8.043208  | -4.470852 | 18.315113 |
| O  | 9.457973  | -6.208598 | 16.416777 |
| Ti | 8.156192  | -4.804527 | 16.428875 |
| Ti | -0.659487 | 0.601367  | 23.325912 |
| O  | -1.008598 | -0.099532 | 25.076289 |
| O  | -2.714559 | 0.183322  | 27.028816 |
| Ti | -0.887073 | 0.846019  | 27.121139 |
| O  | -0.830729 | 2.673401  | 26.470076 |
| O  | -1.080368 | 2.428661  | 22.423410 |
| O  | 0.635871  | -0.231064 | 22.174223 |
| Ti | 2.440948  | -1.031093 | 22.685993 |
| O  | 2.459936  | -0.948787 | 24.516276 |
| O  | 1.034046  | 0.765956  | 26.404686 |
| Ti | 2.344144  | -0.642117 | 26.383330 |
| O  | 4.143401  | -1.917484 | 26.890941 |
| O  | 4.186254  | -2.231912 | 22.630678 |
| Ti | 0.677105  | 3.347335  | 22.679661 |

|    |           |           |           |
|----|-----------|-----------|-----------|
| O  | 0.642151  | 4.270770  | 24.323097 |
| Ti | 0.866088  | 2.828458  | 25.638438 |
| O  | 0.951446  | 1.726625  | 23.946479 |
| O  | 2.270759  | 3.284949  | 26.995580 |
| O  | 2.635777  | 3.291008  | 22.256906 |
| O  | 3.722996  | 0.527287  | 22.382223 |
| Ti | 4.401122  | 2.436755  | 22.760132 |
| O  | 3.983262  | 2.749275  | 24.578831 |
| O  | 3.779892  | 0.751055  | 26.572460 |
| Ti | 4.275662  | 2.719781  | 26.432160 |
| O  | 5.708237  | 3.997059  | 26.473134 |
| O  | 6.225552  | 1.393912  | 26.690771 |
| O  | 6.188925  | 1.222641  | 22.953041 |
| O  | 5.854778  | 3.783865  | 22.275753 |
| O  | 7.776543  | 3.216745  | 24.542543 |
| Ti | 7.466504  | 2.611421  | 22.760319 |
| Ti | 7.337826  | 2.976002  | 26.374184 |
| Ti | 5.498978  | -0.516787 | 26.464292 |
| O  | 5.665326  | -0.733307 | 24.663735 |
| Ti | 5.521664  | -0.786466 | 22.763629 |
| Ti | -4.404003 | -5.131116 | 22.598128 |
| Ti | -3.611140 | -4.865534 | 25.331028 |
| O  | -4.267117 | -3.286922 | 22.299835 |
| Ti | -3.022830 | -1.824583 | 22.423603 |
| O  | -3.461393 | -1.082005 | 24.113011 |
| O  | -3.438707 | -3.128580 | 25.716355 |
| Ti | -2.610666 | -1.255775 | 25.786587 |
| O  | -2.656546 | -5.419446 | 23.691052 |
| O  | -2.214348 | 0.118481  | 22.192244 |
| O  | -1.452141 | -2.944091 | 22.252590 |
| Ti | 0.097069  | -4.179686 | 22.730967 |
| O  | -5.224957 | -5.198962 | 24.298393 |
| O  | -0.159537 | -3.806429 | 24.533978 |
| O  | -1.340600 | -2.430365 | 26.830149 |
| Ti | 0.067797  | -3.794800 | 26.400843 |
| Ti | -1.986927 | -7.344995 | 22.769837 |
| O  | -3.891275 | -6.995240 | 21.961810 |
| O  | -0.601937 | -5.764525 | 26.264867 |
| O  | -0.160251 | -8.442916 | 26.698768 |
| O  | -2.378420 | -7.863929 | 24.667468 |
| Ti | -1.751523 | -7.307700 | 26.295693 |
| O  | -3.244026 | -5.952868 | 26.898820 |
| O  | -0.650897 | -5.961082 | 22.228799 |
| O  | 2.748344  | -8.627453 | 22.063591 |
| O  | 2.973574  | -7.884619 | 26.768869 |
| O  | 1.805370  | -5.113691 | 26.890763 |
| Ti | 1.275972  | -6.992808 | 26.297732 |
| O  | 1.466805  | -7.166841 | 24.510822 |
| O  | 1.837212  | -5.485375 | 22.628987 |
| Ti | 1.204952  | -7.468888 | 22.598210 |
| O  | -0.417166 | -8.476834 | 22.779624 |
| O  | 1.540070  | -2.831303 | 22.335225 |

|    |           |            |           |
|----|-----------|------------|-----------|
| O  | 1.522372  | -2.484049  | 26.439548 |
| O  | 4.924518  | -4.615687  | 27.000603 |
| Ti | 3.262354  | -3.725010  | 26.443458 |
| O  | 3.354398  | -4.051729  | 24.628771 |
| O  | 4.864951  | -5.193054  | 22.209665 |
| Ti | 3.293893  | -4.145041  | 22.725577 |
| O  | 7.257205  | -1.568752  | 22.362711 |
| Ti | 8.833117  | -2.611008  | 22.913647 |
| O  | 8.732021  | -2.303246  | 24.732279 |
| O  | 7.174890  | -1.302243  | 27.109287 |
| Ti | 8.840307  | -2.260885  | 26.632205 |
| O  | 10.573056 | -3.539209  | 27.052545 |
| O  | 10.559327 | -3.822622  | 22.840855 |
| O  | 9.183582  | 2.245669   | 26.892499 |
| O  | 9.204832  | 1.773654   | 22.333020 |
| O  | 10.289567 | -1.205363  | 22.451469 |
| Ti | 10.856564 | 0.745674   | 22.727257 |
| O  | 10.638583 | 0.824186   | 24.563375 |
| O  | 10.249150 | -0.867582  | 26.660629 |
| Ti | 10.727073 | 1.093848   | 26.432861 |
| O  | 12.236142 | 2.344641   | 26.361362 |
| O  | 12.696007 | -0.318022  | 26.799830 |
| O  | 12.788850 | -0.592419  | 22.898137 |
| O  | 12.357352 | 2.031972   | 22.268012 |
| O  | 14.335185 | 1.522081   | 24.543554 |
| Ti | 13.907327 | 0.956216   | 22.834678 |
| O  | 15.538163 | -0.282370  | 22.290704 |
| Ti | 13.759027 | 1.268920   | 26.381532 |
| O  | 15.657293 | 0.691832   | 26.907337 |
| Ti | 16.324267 | -1.130521  | 26.373160 |
| Ti | 15.939466 | -1.596780  | 23.629079 |
| O  | 16.531981 | -2.907224  | 27.287061 |
| Ti | 15.204866 | -4.427757  | 26.919273 |
| O  | 15.756335 | -4.821482  | 25.195637 |
| O  | 16.087869 | -3.306061  | 23.060455 |
| Ti | 14.962592 | -4.911577  | 23.474152 |
| O  | 14.831280 | -1.526536  | 25.224662 |
| O  | 14.702181 | -6.399645  | 26.940985 |
| O  | 13.663209 | -3.316629  | 27.182317 |
| Ti | 12.024361 | -2.232456  | 26.612734 |
| O  | 17.385420 | -1.067166  | 24.840864 |
| O  | 12.134994 | -2.610229  | 24.810493 |
| O  | 13.508990 | -3.827569  | 22.654807 |
| Ti | 12.020487 | -2.487108  | 22.921385 |
| Ti | 6.617274  | -5.899833  | 22.799937 |
| O  | 6.454006  | -5.507173  | 24.585046 |
| Ti | 6.572342  | -5.515087  | 26.493012 |
| Ti | 4.642085  | -9.275871  | 22.564190 |
| O  | 5.814192  | -7.464939  | 26.070203 |
| O  | 6.223690  | -10.069140 | 26.601740 |
| O  | 4.169312  | -9.481800  | 24.431763 |
| Ti | 4.580266  | -8.905901  | 26.160406 |



|    |           |            |           |
|----|-----------|------------|-----------|
| O  | 5.800420  | -7.731504  | 22.391868 |
| Ti | 11.199925 | -9.707450  | 26.033002 |
| O  | 11.212389 | -10.583981 | 24.403472 |
| Ti | 11.243824 | -9.027524  | 23.172056 |
| O  | 11.330239 | -8.023666  | 25.006971 |
| O  | 9.741931  | -9.512652  | 21.985765 |
| O  | 9.361205  | -9.458590  | 26.662342 |
| O  | 8.298081  | -6.801218  | 26.903567 |
| Ti | 7.606092  | -8.605541  | 26.220515 |
| O  | 7.987478  | -8.941121  | 24.430223 |
| O  | 8.332356  | -7.076689  | 22.604153 |
| Ti | 7.722566  | -9.071671  | 22.554401 |
| O  | 6.254374  | -10.329105 | 22.549888 |
| O  | 7.921309  | -4.395909  | 22.406711 |
| O  | 7.912290  | -4.107640  | 26.700083 |
| Ti | 12.918187 | -7.103710  | 26.098000 |
| O  | 13.464323 | -6.288716  | 24.354761 |
| O  | 15.051707 | -6.295420  | 22.210573 |
| Ti | 13.218554 | -6.955793  | 22.368378 |
| O  | 13.047810 | -8.850974  | 22.563717 |
| O  | 13.006261 | -9.114680  | 26.649592 |
| O  | 11.414791 | -6.234468  | 26.976362 |
| Ti | 9.689301  | -5.329266  | 26.552565 |
| O  | 9.597054  | -5.421311  | 24.720443 |
| O  | 11.193255 | -6.957789  | 22.738816 |
| Ti | 9.756068  | -5.677442  | 22.817750 |
| Ti | 0.955308  | -0.209554  | 29.556290 |
| O  | 0.770596  | -0.917466  | 31.305361 |
| O  | -0.684592 | -1.149371  | 33.666893 |
| Ti | 0.874883  | -0.281232  | 33.081168 |
| O  | 1.115055  | 1.600090   | 32.864535 |
| O  | 0.535273  | 1.631344   | 28.740142 |
| O  | 2.296025  | -1.024365  | 28.527494 |
| Ti | 4.042274  | -1.869387  | 29.222021 |
| O  | 3.943805  | -1.536502  | 31.119378 |
| O  | 2.493653  | -0.809514  | 33.798988 |
| Ti | 4.001373  | -1.656339  | 32.970759 |
| O  | 5.702754  | -2.893295  | 33.419172 |
| O  | 5.735434  | -3.053386  | 29.135691 |
| Ti | 2.267052  | 2.575123   | 28.943373 |
| O  | 2.192513  | 3.578567   | 30.551582 |
| Ti | 2.584610  | 2.178822   | 31.832521 |
| O  | 2.566035  | 0.977758   | 30.308125 |
| O  | 4.142264  | 2.207366   | 32.798801 |
| O  | 4.220176  | 2.437450   | 28.592982 |
| O  | 5.338761  | -0.352449  | 28.826298 |
| Ti | 5.984563  | 1.563144   | 28.996155 |
| O  | 5.960531  | 1.786422   | 30.845614 |
| O  | 5.424513  | -0.258968  | 33.402054 |
| Ti | 5.992205  | 1.523065   | 32.700955 |
| O  | 7.405025  | 2.674015   | 33.311199 |
| O  | 7.822998  | 0.268914   | 32.429874 |

|    |           |           |           |
|----|-----------|-----------|-----------|
| O  | 7.843007  | 0.311061  | 29.174491 |
| O  | 7.404114  | 2.963762  | 28.522812 |
| O  | 9.294811  | 2.458556  | 30.761427 |
| Ti | 8.990137  | 1.789804  | 28.999422 |
| Ti | 8.914824  | 1.813338  | 32.471325 |
| Ti | 7.074766  | -1.556716 | 32.914571 |
| O  | 7.150125  | -1.931493 | 31.122940 |
| Ti | 7.215889  | -1.697195 | 29.230107 |
| Ti | -2.538492 | -5.804800 | 28.963912 |
| Ti | -2.038356 | -5.722847 | 31.738718 |
| O  | -2.756542 | -3.926940 | 28.721174 |
| Ti | -1.353667 | -2.655238 | 28.913894 |
| O  | -1.389758 | -2.267674 | 30.793684 |
| O  | -2.275553 | -4.129147 | 32.682213 |
| Ti | -0.989182 | -2.713624 | 32.569416 |
| O  | -0.914501 | -5.576050 | 30.202106 |
| O  | -0.708399 | -0.663190 | 28.634833 |
| O  | 0.159265  | -3.809303 | 28.581568 |
| Ti | 1.662823  | -5.011894 | 29.195849 |
| O  | -3.490941 | -6.140048 | 30.584042 |
| O  | 1.842382  | -3.972164 | 30.825364 |
| O  | 0.386609  | -3.824306 | 33.277303 |
| Ti | 1.899460  | -4.612434 | 32.535860 |
| Ti | -0.073661 | -8.456859 | 28.812478 |
| O  | -1.957197 | -7.651126 | 28.353402 |
| O  | 1.357271  | -6.435746 | 31.828951 |
| O  | 1.539587  | -8.740141 | 33.162929 |
| O  | -0.447503 | -8.847899 | 30.650399 |
| Ti | 0.188420  | -7.915107 | 32.123475 |
| O  | -1.370968 | -7.108038 | 32.827429 |
| O  | 0.953878  | -6.847471 | 28.693727 |
| O  | 4.434240  | -9.493242 | 28.242293 |
| O  | 4.875061  | -8.499878 | 32.982177 |
| O  | 3.418458  | -5.993367 | 33.308521 |
| Ti | 3.128992  | -7.800928 | 32.579039 |
| O  | 3.271012  | -8.162009 | 30.760017 |
| O  | 3.402093  | -6.270564 | 29.070795 |
| Ti | 2.997372  | -8.317875 | 28.878510 |
| O  | 1.483582  | -9.518633 | 28.766930 |
| O  | 3.160226  | -3.640035 | 28.729827 |
| O  | 3.271178  | -3.457977 | 33.414380 |
| O  | 6.448442  | -5.752264 | 33.460987 |
| Ti | 4.950518  | -4.710442 | 32.930390 |
| O  | 4.873285  | -4.803448 | 31.104609 |
| O  | 6.329142  | -6.160997 | 28.586987 |
| Ti | 4.902232  | -4.962135 | 29.152566 |
| O  | 8.944971  | -2.449213 | 28.826639 |
| Ti | 10.512248 | -3.544268 | 29.486858 |
| O  | 10.220732 | -2.654108 | 31.238383 |
| O  | 8.600896  | -1.953502 | 33.918444 |
| Ti | 10.069769 | -2.772913 | 33.063274 |
| O  | 11.636050 | -4.052091 | 33.708764 |

|    |           |            |           |
|----|-----------|------------|-----------|
| O  | 12.325603 | -4.627598  | 29.111898 |
| O  | 10.541103 | 1.324735   | 33.266562 |
| O  | 10.754653 | 0.980363   | 28.638023 |
| O  | 11.890589 | -2.019733  | 28.919375 |
| Ti | 12.353352 | -0.066782  | 29.093286 |
| O  | 12.141316 | 0.214919   | 30.941239 |
| O  | 11.584385 | -1.470634  | 33.530762 |
| Ti | 12.074949 | 0.280722   | 32.820907 |
| O  | 13.633337 | 1.387731   | 33.241260 |
| O  | 13.962758 | -1.157192  | 32.606461 |
| O  | 14.281081 | -1.244310  | 29.179870 |
| O  | 13.768278 | 1.355818   | 28.539396 |
| O  | 15.559301 | 1.041618   | 30.697657 |
| Ti | 15.386148 | 0.307936   | 28.979486 |
| O  | 17.025816 | -0.708678  | 28.421488 |
| Ti | 14.989487 | 0.411152   | 32.384321 |
| O  | 16.639676 | -0.325188  | 32.910156 |
| Ti | 17.025258 | -1.967704  | 32.065662 |
| Ti | 17.265050 | -2.500804  | 29.270286 |
| O  | 17.290690 | -3.249728  | 33.386191 |
| Ti | 16.141229 | -4.791529  | 33.306176 |
| O  | 17.044145 | -5.375728  | 31.740659 |
| O  | 18.054707 | -4.223405  | 29.216573 |
| Ti | 16.839304 | -5.502739  | 29.884415 |
| O  | 15.791582 | -2.611474  | 30.653268 |
| O  | 15.491930 | -6.518909  | 33.630601 |
| O  | 14.622071 | -3.801844  | 33.824198 |
| Ti | 13.147832 | -2.947293  | 33.017137 |
| O  | 18.323169 | -1.799427  | 30.742022 |
| O  | 13.256278 | -3.489969  | 31.275133 |
| O  | 15.250863 | -4.611086  | 29.047600 |
| Ti | 13.756346 | -3.240983  | 29.435934 |
| Ti | 8.122298  | -6.671209  | 29.303591 |
| O  | 7.837587  | -5.238683  | 30.683898 |
| Ti | 7.972390  | -5.876814  | 32.392273 |
| Ti | 6.356879  | -10.132422 | 28.688351 |
| O  | 7.581348  | -7.713960  | 31.272798 |
| O  | 7.713216  | -9.784175  | 33.072266 |
| O  | 5.868669  | -10.169735 | 30.557415 |
| Ti | 6.335363  | -9.068285  | 31.971306 |
| O  | 7.445638  | -8.538218  | 28.596966 |
| Ti | 12.376496 | -9.524926  | 31.690970 |
| O  | 12.844383 | -10.681059 | 30.319594 |
| Ti | 12.900721 | -9.460762  | 28.793305 |
| O  | 12.041821 | -8.096807  | 30.481594 |
| O  | 11.237446 | -10.323505 | 28.074343 |
| O  | 11.000552 | -9.699673  | 32.970467 |
| O  | 9.602135  | -7.179498  | 32.859316 |
| Ti | 9.314303  | -9.077914  | 32.350666 |
| O  | 9.515316  | -9.887425  | 30.666768 |
| O  | 9.877742  | -7.807839  | 29.120375 |
| Ti | 9.359915  | -9.833963  | 28.771875 |

|    |           |            |           |
|----|-----------|------------|-----------|
| O  | 7.939574  | -11.169367 | 28.668989 |
| O  | 9.555057  | -5.270672  | 28.769010 |
| O  | 9.209016  | -4.617284  | 33.247908 |
| Ti | 14.294963 | -7.254652  | 32.339724 |
| O  | 14.928903 | -6.796860  | 30.603456 |
| O  | 16.987700 | -7.006725  | 28.777568 |
| Ti | 15.121648 | -7.461180  | 28.688322 |
| O  | 14.853264 | -9.297047  | 28.753955 |
| O  | 14.022861 | -9.088164  | 32.528691 |
| O  | 12.648277 | -6.556711  | 32.952832 |
| Ti | 10.998656 | -5.702831  | 32.721368 |
| O  | 10.854289 | -5.357614  | 30.909135 |
| O  | 13.050132 | -7.352865  | 28.445957 |
| Ti | 11.393032 | -6.470790  | 29.198541 |

anatase-like 3-D (2,1,0)-mer

|    |           |          |           |
|----|-----------|----------|-----------|
| Ti | -4.110557 | 6.517976 | -2.307878 |
| O  | -4.537539 | 6.369653 | -0.476892 |
| O  | -6.475049 | 6.634846 | 1.745223  |
| Ti | -4.680676 | 6.919352 | 1.312932  |
| O  | -3.907649 | 8.548667 | 1.791268  |
| O  | -3.163966 | 8.162503 | -2.116269 |
| O  | -2.734688 | 5.479878 | -2.985906 |
| Ti | -1.402586 | 4.341391 | -2.233160 |
| O  | -1.487824 | 4.472245 | -0.426224 |
| O  | -3.409930 | 5.740310 | 2.116981  |
| Ti | -1.638489 | 4.874962 | 1.493384  |
| O  | -0.229246 | 3.154215 | 2.108659  |
| O  | -0.042078 | 2.776574 | -2.650134 |
| Ti | -1.601997 | 8.172145 | -1.084703 |
| O  | -1.654134 | 9.496486 | 0.272914  |
| Ti | -1.986312 | 8.340413 | 1.753091  |
| O  | -1.734343 | 6.854188 | 0.423170  |
| O  | -0.204918 | 8.492499 | 2.593380  |
| O  | -0.131306 | 8.008886 | -2.168438 |
| O  | 0.392909  | 5.307202 | -2.538209 |
| Ti | 1.423714  | 6.867745 | -1.864777 |
| O  | 1.359998  | 7.225502 | -0.026260 |
| O  | 0.181985  | 5.721825 | 1.834329  |
| Ti | 1.386880  | 7.450319 | 1.856104  |
| O  | 3.118344  | 8.302987 | 1.899074  |
| O  | 2.838590  | 5.591141 | 2.012072  |
| O  | 2.826318  | 5.140218 | -1.445241 |
| O  | 3.111179  | 7.509902 | -2.515669 |
| O  | 4.872227  | 6.906629 | 0.002357  |
| Ti | 4.319628  | 6.294361 | -1.667290 |
| Ti | 4.331389  | 6.846561 | 1.834850  |
| Ti | 1.495025  | 4.079231 | 1.660199  |
| O  | 1.429816  | 3.361341 | -0.082124 |
| Ti | 1.584920  | 3.627383 | -1.926336 |
| O  | -5.765515 | 6.033504 | -3.077867 |
| O  | 2.898023  | 2.660311 | -2.847058 |

|    |           |           |           |
|----|-----------|-----------|-----------|
| Ti | 4.029083  | 1.367053  | -2.094261 |
| O  | 4.066592  | 1.488692  | -0.251798 |
| O  | 2.924342  | 2.830294  | 2.222425  |
| Ti | 4.128147  | 1.397025  | 1.675560  |
| O  | 5.499025  | -0.323897 | 2.207527  |
| O  | 5.314698  | -0.254233 | -2.616496 |
| O  | 5.926855  | 5.631486  | 2.300137  |
| O  | 5.643544  | 5.322250  | -2.576453 |
| O  | 5.847079  | 2.243353  | -2.490789 |
| Ti | 6.774959  | 3.889129  | -2.023902 |
| O  | 6.650604  | 4.070741  | -0.172963 |
| O  | 5.916605  | 2.326287  | 1.766829  |
| Ti | 6.958445  | 4.089020  | 1.686884  |
| O  | 8.737277  | 4.899193  | 1.758495  |
| O  | 8.464269  | 2.200081  | 1.941251  |
| O  | 8.201572  | 1.944295  | -1.426320 |
| O  | 8.594855  | 4.290574  | -2.573473 |
| O  | 10.449049 | 3.712078  | -0.091662 |
| Ti | 9.682629  | 3.064634  | -1.645119 |
| O  | 10.998015 | 1.807359  | -2.260594 |
| Ti | 9.921619  | 3.469897  | 1.728583  |
| O  | 11.517808 | 2.172117  | 2.091402  |
| Ti | 11.637119 | 0.273086  | 1.475203  |
| Ti | 11.194189 | 0.233757  | -1.289263 |
| O  | 11.311185 | -1.578886 | 2.231574  |
| Ti | 9.462656  | -2.348539 | 1.794353  |
| O  | 9.364671  | -2.400462 | -0.090911 |
| O  | 10.865729 | -1.327419 | -2.218364 |
| Ti | 9.151423  | -2.203780 | -1.940650 |
| O  | 10.103662 | 0.344912  | 0.318308  |
| O  | 8.459533  | -0.802544 | 2.391656  |
| Ti | 7.221148  | 0.621092  | 1.726785  |
| O  | 12.698473 | 0.154668  | -0.060970 |
| O  | 6.882004  | -0.026985 | -0.018847 |
| O  | 8.104463  | -0.809813 | -2.608451 |
| Ti | 6.967052  | 0.453792  | -1.807187 |
| Ti | -6.669054 | 4.467824  | -2.487558 |
| O  | -6.886666 | 4.680702  | -0.611533 |
| O  | -8.820841 | 4.602930  | 1.791438  |
| Ti | -7.039184 | 4.913698  | 1.241619  |
| O  | -5.507974 | 3.105087  | -2.889386 |
| Ti | -4.278190 | 1.839943  | -2.143060 |
| O  | -4.487645 | 2.043648  | -0.339400 |
| O  | -5.866677 | 3.649235  | 2.012135  |
| Ti | -4.519268 | 2.238766  | 1.604431  |
| O  | -3.062884 | 0.530149  | 1.983737  |
| O  | -2.890613 | 0.195480  | -2.310628 |
| O  | -2.605439 | 2.763920  | -2.639160 |
| O  | -2.793128 | 3.174796  | 1.546180  |
| Ti | -1.379090 | 1.565852  | 1.596083  |
| O  | -1.126063 | 1.262400  | -0.246060 |
| Ti | -1.207965 | 1.213960  | -2.116224 |

|    |            |           |           |
|----|------------|-----------|-----------|
| Ti | -10.973694 | -0.088117 | -0.982781 |
| Ti | -10.991134 | 0.326532  | 1.851165  |
| O  | -10.763042 | 1.328048  | -2.169140 |
| Ti | -9.083641  | 2.258993  | -2.327805 |
| O  | -9.059149  | 2.714856  | -0.489373 |
| O  | -11.066151 | 2.255697  | 1.914266  |
| Ti | -9.411364  | 2.901480  | 1.335566  |
| O  | -9.593779  | -0.081973 | 0.451171  |
| O  | -8.378154  | 3.836856  | -3.069029 |
| O  | -8.106574  | 0.848183  | -3.025553 |
| Ti | -7.058623  | -0.469022 | -2.148017 |
| O  | -12.229925 | 0.166000  | 0.390559  |
| O  | -7.055111  | -0.066284 | -0.372740 |
| O  | -8.339785  | 1.528440  | 2.133200  |
| Ti | -7.516279  | -0.236115 | 1.486562  |
| Ti | -9.862817  | -3.068812 | -1.503981 |
| O  | -11.170267 | -1.727394 | -1.858064 |
| O  | -8.597853  | -1.980020 | 1.694508  |
| O  | -8.944539  | -4.618566 | 2.248797  |
| O  | -10.589818 | -3.562946 | 0.178991  |
| Ti | -10.156608 | -3.049801 | 1.927609  |
| O  | -11.294925 | -1.513709 | 2.577848  |
| O  | -8.403709  | -1.913648 | -1.868845 |
| O  | -5.910916  | -5.286126 | -2.535614 |
| O  | -5.900118  | -5.054531 | 2.171961  |
| O  | -6.084475  | -2.018547 | 2.013012  |
| Ti | -7.177084  | -3.675271 | 1.722161  |
| O  | -7.062941  | -3.860895 | -0.130608 |
| O  | -5.930833  | -2.296294 | -2.538513 |
| Ti | -7.022497  | -3.841522 | -2.018762 |
| O  | -8.881135  | -4.402618 | -2.376592 |
| O  | -5.349314  | 0.243648  | -2.823553 |
| O  | -5.690253  | 0.617543  | 1.673522  |
| O  | -3.050628  | -2.362284 | 2.195619  |
| Ti | -4.345885  | -1.006988 | 1.573966  |
| O  | -4.226756  | -1.420844 | -0.272973 |
| O  | -2.967264  | -2.562475 | -2.951201 |
| Ti | -4.136785  | -1.355094 | -2.144543 |
| O  | -0.049058  | -0.015559 | -2.905748 |
| Ti | 1.139450   | -1.210251 | -2.078712 |
| O  | 1.011555   | -1.165924 | -0.240159 |
| O  | -0.140502  | 0.160314  | 2.199247  |
| Ti | 1.174610   | -1.192494 | 1.679699  |
| O  | 2.638578   | -2.921251 | 2.057981  |
| O  | 2.546999   | -2.807011 | -2.447194 |
| O  | 2.820915   | -0.204666 | -2.375462 |
| O  | 2.912303   | -0.224824 | 1.687702  |
| O  | 8.611357   | -4.058015 | 1.899327  |
| Ti | 6.840166   | -4.673932 | 1.733150  |
| O  | 6.586624   | -4.394257 | -0.168212 |
| O  | 8.325046   | -3.784308 | -2.511255 |
| Ti | 6.566503   | -4.379208 | -2.011820 |

|    |           |           |           |
|----|-----------|-----------|-----------|
| O  | 6.084932  | -6.398149 | 1.897528  |
| O  | 5.544647  | -3.313976 | 2.276891  |
| Ti | 4.288993  | -1.878412 | 1.715221  |
| O  | 4.348145  | -1.955916 | -0.173766 |
| O  | 5.434521  | -3.092625 | -2.725465 |
| Ti | 4.208070  | -1.833163 | -2.031285 |
| Ti | -1.683957 | -3.579065 | -2.017581 |
| O  | -1.672323 | -3.325504 | -0.194779 |
| Ti | -1.722219 | -3.673099 | 1.685200  |
| Ti | -4.462403 | -6.256996 | -1.807766 |
| O  | -3.015875 | -5.283881 | 1.617019  |
| O  | -3.342121 | -7.984341 | 2.125587  |
| O  | -5.008888 | -6.803903 | -0.089233 |
| Ti | -4.538470 | -6.401402 | 1.695852  |
| O  | -3.011254 | -5.063739 | -1.785147 |
| Ti | 1.530874  | -8.800436 | 1.507966  |
| O  | 1.477289  | -9.868646 | -0.023942 |
| Ti | 1.472010  | -8.378421 | -1.271590 |
| O  | 1.561375  | -7.259333 | 0.309353  |
| O  | -0.076271 | -8.075532 | -2.253270 |
| O  | -0.327686 | -8.392476 | 2.071247  |
| O  | -0.368625 | -5.451707 | 2.060382  |
| Ti | -1.623248 | -6.992132 | 1.682370  |
| O  | -1.667626 | -7.032039 | -0.169072 |
| O  | -0.443427 | -5.305858 | -2.520090 |
| Ti | -1.557360 | -6.855882 | -2.035028 |
| O  | -3.276550 | -7.500888 | -2.642856 |
| O  | 0.018407  | -2.806380 | -2.637865 |
| O  | 0.054813  | -2.856737 | 1.836733  |
| Ti | 4.256438  | -6.939134 | 1.791931  |
| O  | 4.220500  | -6.697344 | -0.091666 |
| O  | 5.698016  | -6.002480 | -2.544879 |
| Ti | 4.029135  | -6.625285 | -1.952959 |
| O  | 3.073332  | -8.281143 | -2.208362 |
| O  | 3.374393  | -8.702845 | 2.269043  |
| O  | 2.808503  | -5.769612 | 2.344229  |
| Ti | 1.418080  | -4.527625 | 1.672861  |
| O  | 1.396491  | -4.454670 | -0.226907 |
| O  | 2.668807  | -5.556666 | -2.684638 |
| Ti | 1.334913  | -4.376067 | -2.079448 |
| Ti | -3.128025 | 5.733460  | 4.287884  |
| O  | -3.094123 | 5.488886  | 6.171507  |
| O  | -4.570061 | 4.793327  | 8.626749  |
| Ti | -2.901661 | 5.415041  | 8.031950  |
| O  | -1.944381 | 7.069800  | 8.289146  |
| O  | -2.243393 | 7.495957  | 3.811271  |
| O  | -1.684815 | 4.558031  | 3.737362  |
| Ti | -0.293812 | 3.316644  | 4.407918  |
| O  | -0.270628 | 3.242217  | 6.307539  |
| O  | -1.541679 | 4.345915  | 8.764014  |
| Ti | -0.209185 | 3.163661  | 8.160167  |
| O  | 1.108820  | 1.592727  | 8.718133  |

|    |           |           |          |
|----|-----------|-----------|----------|
| O  | 1.069934  | 1.645685  | 4.245854 |
| Ti | -0.399589 | 7.591770  | 4.572544 |
| O  | -0.345165 | 8.659289  | 6.105051 |
| Ti | -0.342913 | 7.166691  | 7.351018 |
| O  | -0.434909 | 6.049736  | 5.768360 |
| O  | 1.203023  | 6.859430  | 8.332382 |
| O  | 1.459115  | 7.183308  | 4.010750 |
| O  | 1.493726  | 4.241080  | 4.021762 |
| Ti | 2.751512  | 5.779573  | 4.400001 |
| O  | 2.796169  | 5.819372  | 6.250952 |
| O  | 1.569573  | 4.091973  | 8.601253 |
| Ti | 2.685771  | 5.641651  | 8.116100 |
| O  | 4.404440  | 6.287796  | 8.724696 |
| O  | 4.139026  | 3.850097  | 7.869436 |
| O  | 4.142750  | 4.070864  | 4.465043 |
| O  | 4.469953  | 6.771692  | 3.955133 |
| O  | 6.137469  | 5.588853  | 6.170743 |
| Ti | 5.666580  | 5.187776  | 4.385424 |
| Ti | 5.590066  | 5.043860  | 7.889307 |
| Ti | 2.810501  | 2.366338  | 8.099883 |
| O  | 2.799985  | 2.115533  | 6.276534 |
| Ti | 2.846497  | 2.461511  | 4.397037 |
| O  | -4.957892 | 5.192748  | 4.183598 |
| O  | 4.172849  | 1.149449  | 3.883691 |
| Ti | 5.469854  | -0.204403 | 4.505410 |
| O  | 5.354293  | 0.208676  | 6.353248 |
| O  | 4.093329  | 1.348376  | 9.033226 |
| Ti | 5.263670  | 0.141966  | 8.224919 |
| O  | 6.477502  | -1.454660 | 8.904001 |
| O  | 6.816361  | -1.826370 | 4.411224 |
| O  | 7.040806  | 4.073764  | 8.613731 |
| O  | 7.026426  | 3.840640  | 3.910711 |
| O  | 7.210850  | 0.805225  | 4.069652 |
| Ti | 8.303836  | 2.460256  | 4.358326 |
| O  | 8.194731  | 2.643369  | 6.211391 |
| O  | 7.058177  | 1.084417  | 8.617850 |
| Ti | 8.151893  | 2.628237  | 8.098930 |
| O  | 10.008356 | 3.192977  | 8.458610 |
| O  | 9.538268  | 0.700031  | 7.955383 |
| O  | 9.728558  | 0.767376  | 4.381672 |
| O  | 10.069659 | 3.406145  | 3.834287 |
| O  | 11.718453 | 2.347910  | 5.903630 |
| Ti | 11.284059 | 1.839021  | 4.155559 |
| O  | 12.432182 | 0.306444  | 3.506373 |
| Ti | 10.992585 | 1.859109  | 7.589167 |
| O  | 12.301813 | 0.520811  | 7.948915 |
| Ti | 12.108420 | -1.119345 | 7.073808 |
| Ti | 12.134641 | -1.531719 | 4.238813 |
| O  | 11.901761 | -2.534947 | 8.261670 |
| Ti | 10.220904 | -3.461859 | 8.417556 |
| O  | 10.196518 | -3.915668 | 6.578428 |
| O  | 12.201563 | -3.459852 | 4.171748 |



|    |            |           |          |
|----|------------|-----------|----------|
| Ti | 10.547183  | -4.100500 | 4.751319 |
| O  | 10.734131  | -1.126998 | 5.632727 |
| O  | 9.245607   | -2.049251 | 9.111400 |
| Ti | 8.186995   | -0.741908 | 8.233336 |
| O  | 13.368640  | -1.375350 | 5.701752 |
| O  | 8.189058   | -1.141614 | 6.456670 |
| O  | 9.465871   | -2.738614 | 3.952116 |
| Ti | 8.644208   | -0.975734 | 4.597222 |
| Ti | -5.711744  | 3.468621  | 4.348266 |
| O  | -5.461602  | 3.187081  | 6.248682 |
| O  | -7.194141  | 2.567035  | 8.590655 |
| Ti | -5.440090  | 3.170791  | 8.093017 |
| O  | -4.419894  | 2.105841  | 3.802881 |
| Ti | -3.165989  | 0.667461  | 4.363575 |
| O  | -3.222953  | 0.745577  | 6.252754 |
| O  | -4.304046  | 1.884017  | 8.805794 |
| Ti | -3.081301  | 0.622751  | 8.109665 |
| O  | -1.694802  | -1.006329 | 8.456964 |
| O  | -1.789322  | -0.985846 | 4.392093 |
| O  | -1.513790  | 1.709009  | 4.023621 |
| O  | -1.420628  | 1.595771  | 8.530697 |
| Ti | -0.013478  | -0.001578 | 8.160467 |
| O  | 0.111716   | -0.047075 | 6.321574 |
| Ti | -0.050091  | -0.018372 | 4.402613 |
| Ti | -10.506041 | -1.486226 | 4.614949 |
| Ti | -10.063746 | -1.449030 | 7.381948 |
| O  | -10.182417 | 0.367155  | 3.858431 |
| Ti | -8.332587  | 1.141427  | 4.289911 |
| O  | -8.236750  | 1.183708  | 6.174820 |
| O  | -9.733316  | 0.110196  | 8.314085 |
| Ti | -8.021429  | 0.987796  | 8.024505 |
| O  | -8.974238  | -1.557848 | 5.774248 |
| O  | -7.484515  | 2.850682  | 4.185370 |
| O  | -7.340592  | -0.412320 | 3.690318 |
| Ti | -6.098538  | -1.832598 | 4.357970 |
| O  | -11.567093 | -1.371493 | 6.151806 |
| O  | -5.763246  | -1.174861 | 6.100042 |
| O  | -6.978387  | -0.409571 | 8.699414 |
| Ti | -5.842384  | -1.665018 | 7.887645 |
| Ti | -8.794729  | -4.682163 | 4.355044 |
| O  | -10.389433 | -3.381552 | 3.993016 |
| O  | -7.073856  | -3.157065 | 7.501468 |
| O  | -7.464050  | -5.501040 | 8.658250 |
| O  | -9.322633  | -4.920809 | 6.175810 |
| Ti | -8.553339  | -4.276088 | 7.730409 |
| O  | -9.867062  | -3.021688 | 8.354287 |
| O  | -7.339262  | -3.412794 | 4.138852 |
| O  | -4.798421  | -6.843949 | 3.781384 |
| O  | -4.512830  | -6.533428 | 8.655752 |
| O  | -4.721778  | -3.452706 | 8.572100 |
| Ti | -5.645513  | -5.100618 | 8.105520 |
| O  | -5.523607  | -5.283885 | 6.254612 |

|    |           |            |          |
|----|-----------|------------|----------|
| O  | -4.794565 | -3.535924  | 4.318813 |
| Ti | -5.832582 | -5.302366  | 4.395024 |
| O  | -7.611666 | -6.111951  | 4.325607 |
| O  | -4.376564 | -0.886950  | 3.873382 |
| O  | -4.188920 | -0.954930  | 8.693702 |
| O  | -1.773852 | -3.872396  | 8.925365 |
| Ti | -2.903383 | -2.577032  | 8.173761 |
| O  | -2.945090 | -2.697775  | 6.331646 |
| O  | -1.799688 | -4.040158  | 3.859714 |
| Ti | -3.006581 | -2.606541  | 4.403613 |
| O  | 1.264087  | -1.371461  | 3.882925 |
| Ti | 2.502759  | -2.776500  | 4.485889 |
| O  | 2.251716  | -2.472863  | 6.328232 |
| O  | 1.173934  | -1.198295  | 8.986835 |
| Ti | 2.335850  | -2.426142  | 8.199210 |
| O  | 3.733714  | -3.975557  | 8.720657 |
| O  | 3.919683  | -4.384099  | 4.536315 |
| O  | 4.187418  | -1.740543  | 4.095456 |
| O  | 4.018933  | -1.408923  | 8.390619 |
| O  | 9.511077  | -5.041163  | 9.154624 |
| Ti | 7.801065  | -5.669310  | 8.571193 |
| O  | 8.015351  | -5.873185  | 6.694439 |
| O  | 9.954688  | -5.802849  | 4.298621 |
| Ti | 8.170712  | -6.113645  | 4.841986 |
| O  | 6.898005  | -7.235903  | 9.158165 |
| O  | 6.640423  | -4.308868  | 8.977854 |
| Ti | 5.406189  | -3.051193  | 8.223268 |
| O  | 5.616912  | -3.257723  | 6.418976 |
| O  | 6.995672  | -4.853885  | 4.065764 |
| Ti | 5.645624  | -3.446367  | 4.475201 |
| Ti | -0.370506 | -5.289881  | 4.421990 |
| O  | -0.306275 | -4.568925  | 6.163530 |
| Ti | -0.458618 | -4.839110  | 8.007058 |
| Ti | -3.202884 | -8.059799  | 4.246624 |
| O  | -1.696123 | -6.354159  | 7.523781 |
| O  | -1.980608 | -8.721649  | 8.598830 |
| O  | -3.742624 | -8.122956  | 6.078941 |
| Ti | -3.189693 | -7.507560  | 7.748872 |
| O  | -1.711786 | -6.803125  | 4.070126 |
| Ti | 2.737147  | -9.381845  | 7.165145 |
| O  | 2.790907  | -10.704063 | 5.806229 |
| Ti | 3.119926  | -9.546818  | 4.325737 |
| O  | 2.864848  | -8.063350  | 5.658348 |
| O  | 1.337142  | -9.700988  | 3.486312 |
| O  | 1.263174  | -9.221049  | 8.246542 |
| O  | 0.735057  | -6.519922  | 8.618573 |
| Ti | -0.293698 | -8.081695  | 7.945085 |
| O  | -0.230879 | -8.443151  | 6.107418 |
| O  | 0.942381  | -6.930707  | 4.250567 |
| Ti | -0.255870 | -8.662317  | 4.225158 |
| O  | -1.988503 | -9.513800  | 4.179955 |
| O  | 1.353785  | -4.367211  | 3.972508 |

|    |          |           |          |
|----|----------|-----------|----------|
| O  | 1.169057 | -3.988547 | 8.732181 |
| Ti | 5.245102 | -7.724470 | 8.386234 |
| O  | 5.671370 | -7.572461 | 6.555443 |
| O  | 7.609715 | -7.835324 | 4.340280 |
| Ti | 5.813101 | -8.124106 | 4.764168 |
| O  | 5.041339 | -9.753232 | 4.286981 |
| O  | 4.299650 | -9.370124 | 8.196969 |
| O  | 3.865846 | -6.688971 | 9.061016 |
| Ti | 2.528894 | -5.552863 | 8.313528 |
| O  | 2.612245 | -5.680167 | 6.506731 |
| O  | 4.536329 | -6.948676 | 3.963913 |
| Ti | 2.765102 | -6.085149 | 4.587926 |

anatase-like 3-D (2,1,1)-mer

|    |           |          |           |
|----|-----------|----------|-----------|
| Ti | -4.268196 | 6.462828 | -2.096794 |
| O  | -4.704044 | 6.166444 | -0.292004 |
| O  | -6.844888 | 6.672134 | 1.577053  |
| Ti | -4.935054 | 6.765887 | 1.542573  |
| O  | -4.147605 | 8.433910 | 1.722065  |
| O  | -3.365188 | 8.117351 | -2.135056 |
| O  | -2.906811 | 5.470442 | -2.932947 |
| Ti | -1.472420 | 4.355218 | -2.441254 |
| O  | -1.444912 | 4.279709 | -0.623454 |
| O  | -3.038554 | 6.045837 | 1.911253  |
| Ti | -1.570789 | 4.834696 | 1.233368  |
| O  | -0.241026 | 3.133861 | 1.914959  |
| O  | -0.094557 | 2.811064 | -2.856164 |
| Ti | -1.701627 | 8.154999 | -1.241562 |
| O  | -1.900764 | 9.385764 | 0.168264  |
| Ti | -2.193176 | 8.135053 | 1.604724  |
| O  | -1.676471 | 6.747769 | 0.064660  |
| O  | -0.365214 | 8.438263 | 2.408929  |
| O  | -0.224572 | 8.093891 | -2.376043 |
| O  | 0.303901  | 5.367604 | -2.689220 |
| Ti | 1.296783  | 6.964340 | -1.999072 |
| O  | 1.291340  | 7.390134 | -0.160669 |
| O  | 0.204684  | 5.711086 | 1.638105  |
| Ti | 1.307942  | 7.487450 | 1.722656  |
| O  | 3.040593  | 8.343047 | 1.854149  |
| O  | 2.792292  | 5.637888 | 1.904080  |
| O  | 2.672456  | 5.231551 | -1.472856 |
| O  | 3.015547  | 7.552713 | -2.638621 |
| O  | 4.782153  | 6.969392 | -0.065482 |
| Ti | 4.192368  | 6.351363 | -1.727288 |
| Ti | 4.268144  | 6.896346 | 1.774558  |
| Ti | 1.503121  | 4.086733 | 1.478517  |
| O  | 1.396878  | 3.303461 | -0.240392 |
| Ti | 1.497060  | 3.693001 | -2.072437 |
| O  | -5.872304 | 6.065660 | -3.053567 |
| O  | 2.852085  | 2.817998 | -3.020586 |
| Ti | 3.970341  | 1.518477 | -2.249901 |
| O  | 3.996507  | 1.599833 | -0.398822 |

|    |            |           |           |
|----|------------|-----------|-----------|
| O  | 2.955415   | 2.923270  | 2.120942  |
| Ti | 4.061487   | 1.413114  | 1.517445  |
| O  | 5.409630   | -0.271441 | 1.995437  |
| O  | 5.230009   | -0.098911 | -2.818096 |
| O  | 5.894257   | 5.725820  | 2.265511  |
| O  | 5.548689   | 5.403514  | -2.609362 |
| O  | 5.786431   | 2.405549  | -2.637109 |
| Ti | 6.752231   | 4.017190  | -2.067711 |
| O  | 6.624203   | 4.151740  | -0.219427 |
| O  | 5.850673   | 2.393436  | 1.642331  |
| Ti | 6.920208   | 4.158267  | 1.653763  |
| O  | 8.731565   | 4.856420  | 1.760438  |
| O  | 8.434720   | 2.192882  | 1.863118  |
| O  | 8.156683   | 2.100869  | -1.607093 |
| O  | 8.575011   | 4.500228  | -2.569319 |
| O  | 10.446029  | 3.794648  | -0.112862 |
| Ti | 9.661905   | 3.225576  | -1.703585 |
| O  | 11.000149  | 2.047689  | -2.394074 |
| Ti | 9.936972   | 3.415250  | 1.681752  |
| O  | 11.565636  | 2.147495  | 2.153652  |
| Ti | 11.614854  | 0.297955  | 1.372349  |
| Ti | 11.161580  | 0.467127  | -1.397147 |
| O  | 11.188260  | -1.526940 | 1.725177  |
| Ti | 9.440881   | -2.256230 | 1.532616  |
| O  | 9.034748   | -2.175679 | -0.335298 |
| O  | 10.761461  | -1.080827 | -2.338141 |
| Ti | 9.044654   | -1.960652 | -2.175106 |
| O  | 10.087496  | 0.677577  | 0.178718  |
| O  | 8.307550   | -0.788435 | 2.115052  |
| Ti | 7.125013   | 0.701156  | 1.491045  |
| O  | 12.666157  | 0.289880  | -0.203668 |
| O  | 6.790395   | 0.127442  | -0.276090 |
| O  | 8.037778   | -0.578587 | -2.942865 |
| Ti | 6.908623   | 0.625589  | -2.060626 |
| Ti | -6.828284  | 4.475915  | -2.737259 |
| O  | -7.233120  | 4.712505  | -0.895963 |
| O  | -9.030639  | 4.614853  | 1.627912  |
| Ti | -7.297524  | 4.986256  | 0.941311  |
| O  | -5.635028  | 3.128645  | -3.119841 |
| Ti | -4.357858  | 1.883526  | -2.410257 |
| O  | -4.550880  | 2.126300  | -0.596719 |
| O  | -5.994524  | 3.756838  | 1.626628  |
| Ti | -4.606417  | 2.319582  | 1.326581  |
| O  | -3.200677  | 0.610257  | 1.790810  |
| O  | -2.985713  | 0.226694  | -2.537850 |
| O  | -2.677890  | 2.777498  | -2.937708 |
| O  | -2.857110  | 3.231085  | 1.361409  |
| Ti | -1.456292  | 1.581178  | 1.387370  |
| O  | -1.257807  | 1.248395  | -0.461577 |
| Ti | -1.293537  | 1.258919  | -2.337971 |
| Ti | -11.074568 | -0.100171 | -1.127980 |
| Ti | -10.977823 | 0.378091  | 1.726701  |

|    |            |           |           |
|----|------------|-----------|-----------|
| O  | -10.890564 | 1.293584  | -2.362656 |
| Ti | -9.231974  | 2.242158  | -2.562347 |
| O  | -9.267880  | 2.776285  | -0.726668 |
| O  | -11.283973 | 2.304973  | 1.677213  |
| Ti | -9.659620  | 2.972480  | 1.077516  |
| O  | -9.650354  | -0.129395 | 0.224319  |
| O  | -8.518025  | 3.787989  | -3.357112 |
| O  | -8.223402  | 0.827840  | -3.207876 |
| Ti | -7.147673  | -0.445307 | -2.306535 |
| O  | -12.269089 | 0.161310  | 0.271363  |
| O  | -7.100981  | 0.015529  | -0.542503 |
| O  | -8.692378  | 1.469267  | 1.870702  |
| Ti | -7.604841  | -0.218507 | 1.295519  |
| Ti | -9.984466  | -3.027340 | -1.552859 |
| O  | -11.303589 | -1.753626 | -2.008009 |
| O  | -8.728171  | -1.910773 | 1.658678  |
| O  | -9.137406  | -4.519350 | 2.293295  |
| O  | -10.701119 | -3.477284 | 0.153866  |
| Ti | -10.315892 | -2.951811 | 1.913759  |
| O  | -11.418455 | -1.408376 | 2.532044  |
| O  | -8.502441  | -1.889325 | -1.970259 |
| O  | -6.017933  | -5.203308 | -2.589606 |
| O  | -6.112963  | -5.077655 | 2.077621  |
| O  | -6.204823  | -1.967565 | 1.819958  |
| Ti | -7.357680  | -3.629069 | 1.666785  |
| O  | -7.247798  | -3.810886 | -0.191407 |
| O  | -6.044815  | -2.268810 | -2.657231 |
| Ti | -7.172735  | -3.780096 | -2.081267 |
| O  | -9.025547  | -4.378860 | -2.426813 |
| O  | -5.453122  | 0.272667  | -3.033541 |
| O  | -5.807295  | 0.718521  | 1.518242  |
| O  | -3.199837  | -2.345882 | 1.983737  |
| Ti | -4.462919  | -0.939088 | 1.394545  |
| O  | -4.338541  | -1.320872 | -0.457377 |
| O  | -3.106895  | -2.555526 | -3.144011 |
| Ti | -4.237158  | -1.307325 | -2.334830 |
| O  | -0.124454  | 0.070048  | -3.164113 |
| Ti | 1.072479   | -1.073073 | -2.276305 |
| O  | 0.923304   | -1.037152 | -0.440803 |
| O  | -0.241201  | 0.151714  | 1.989593  |
| Ti | 1.114558   | -1.203401 | 1.471237  |
| O  | 2.555363   | -2.905849 | 1.822237  |
| O  | 2.467389   | -2.630318 | -2.711077 |
| O  | 2.745647   | -0.042665 | -2.523914 |
| O  | 2.838735   | -0.197501 | 1.528076  |
| O  | 8.745827   | -4.023881 | 1.746563  |
| Ti | 6.949945   | -4.571024 | 1.515781  |
| O  | 6.714984   | -4.311003 | -0.377573 |
| O  | 8.299559   | -3.574436 | -2.800353 |
| Ti | 6.584466   | -4.213922 | -2.230549 |
| O  | 6.250243   | -6.350102 | 1.699777  |
| O  | 5.616214   | -3.246827 | 2.047867  |

|    |           |           |           |
|----|-----------|-----------|-----------|
| Ti | 4.229024  | -1.894284 | 1.524280  |
| O  | 4.258837  | -1.873229 | -0.372683 |
| O  | 5.400114  | -2.929548 | -2.868837 |
| Ti | 4.134384  | -1.683654 | -2.222241 |
| Ti | -1.773431 | -3.452605 | -2.164886 |
| O  | -1.784941 | -3.120135 | -0.352900 |
| Ti | -1.791864 | -3.635439 | 1.490694  |
| Ti | -4.563538 | -6.136082 | -1.848654 |
| O  | -3.096642 | -5.240534 | 1.578180  |
| O  | -3.485411 | -7.937480 | 2.122179  |
| O  | -5.099090 | -6.721260 | -0.137985 |
| Ti | -4.628703 | -6.322105 | 1.654379  |
| O  | -3.082582 | -4.963612 | -1.744536 |
| Ti | 1.604079  | -8.385470 | 1.757010  |
| O  | 1.401249  | -9.382855 | 0.147013  |
| Ti | 1.358915  | -7.928710 | -1.060372 |
| O  | 1.337826  | -6.715530 | 0.518045  |
| O  | -0.116170 | -7.783044 | -2.189145 |
| O  | -0.464518 | -8.474044 | 2.054571  |
| O  | -0.517542 | -5.442172 | 1.865517  |
| Ti | -1.715530 | -7.063765 | 1.569711  |
| O  | -1.876837 | -7.062397 | -0.261260 |
| O  | -0.589230 | -5.154354 | -2.709478 |
| Ti | -1.697210 | -6.688085 | -2.124493 |
| O  | -3.396419 | -7.331729 | -2.785140 |
| O  | -0.100889 | -2.651570 | -2.835901 |
| O  | 0.031984  | -2.908531 | 1.575612  |
| Ti | 4.411400  | -6.694414 | 1.538843  |
| O  | 4.210349  | -6.109321 | -0.282525 |
| O  | 5.674472  | -5.807977 | -2.781414 |
| Ti | 3.968228  | -6.263507 | -2.118977 |
| O  | 2.947204  | -7.886716 | -2.038912 |
| O  | 3.505092  | -8.364967 | 1.799529  |
| O  | 3.048119  | -5.439493 | 2.118262  |
| Ti | 1.358381  | -4.615027 | 1.368444  |
| O  | 1.285299  | -4.335720 | -0.549690 |
| O  | 2.611836  | -5.317547 | -3.024832 |
| Ti | 1.238394  | -4.205078 | -2.374314 |
| Ti | -3.046609 | 5.882126  | 4.063738  |
| O  | -3.615889 | 5.700139  | 5.850718  |
| O  | -5.191885 | 5.442872  | 8.267919  |
| Ti | -3.450364 | 5.868095  | 7.702593  |
| O  | -2.452053 | 7.494053  | 7.917082  |
| O  | -2.339700 | 7.725516  | 3.787680  |
| O  | -1.745771 | 4.586481  | 3.595295  |
| Ti | -0.343726 | 3.311601  | 4.207903  |
| O  | -0.318829 | 3.546876  | 6.067835  |
| O  | -2.129745 | 4.641385  | 8.303391  |
| Ti | -0.478870 | 3.559117  | 7.948034  |
| O  | 0.975228  | 1.927318  | 8.437578  |
| O  | 1.036481  | 1.660484  | 4.131077  |
| Ti | -0.460971 | 7.815545  | 4.460356  |

|    |           |           |          |
|----|-----------|-----------|----------|
| O  | -0.337177 | 8.862713  | 6.034424 |
| Ti | -0.703304 | 7.415038  | 7.253353 |
| O  | -0.830507 | 6.307948  | 5.683278 |
| O  | 0.711063  | 7.050955  | 8.478409 |
| O  | 1.315694  | 7.237092  | 3.907997 |
| O  | 1.410846  | 4.303279  | 3.802758 |
| Ti | 2.644569  | 5.828805  | 4.320061 |
| O  | 2.346541  | 6.033928  | 6.168652 |
| O  | 1.204874  | 4.564992  | 8.471175 |
| Ti | 2.598765  | 6.167579  | 8.011854 |
| O  | 4.333357  | 7.020026  | 7.959275 |
| O  | 3.997983  | 4.384565  | 8.191398 |
| O  | 4.055507  | 4.194740  | 4.465961 |
| O  | 4.362197  | 6.815877  | 3.911397 |
| O  | 6.130897  | 5.691318  | 6.104311 |
| Ti | 5.622675  | 5.258572  | 4.346446 |
| Ti | 5.571920  | 5.573942  | 7.927273 |
| Ti | 2.693438  | 2.829339  | 8.013152 |
| O  | 2.714019  | 2.738449  | 6.186925 |
| Ti | 2.765259  | 2.564127  | 4.260257 |
| O  | -4.964422 | 5.536598  | 3.392200 |
| O  | 4.008387  | 1.175579  | 3.767527 |
| Ti | 5.346437  | -0.166769 | 4.282320 |
| O  | 5.307491  | 0.122634  | 6.107736 |
| O  | 3.992893  | 1.421183  | 8.464050 |
| Ti | 5.367475  | 0.083208  | 8.014243 |
| O  | 6.777439  | -1.656696 | 8.450824 |
| O  | 6.716716  | -1.804803 | 4.261180 |
| O  | 7.128008  | 4.288354  | 8.379714 |
| O  | 6.930609  | 3.863731  | 3.826806 |
| O  | 7.092397  | 0.830047  | 3.823241 |
| Ti | 8.238541  | 2.449192  | 4.202027 |
| O  | 8.064751  | 2.540998  | 6.025359 |
| O  | 7.139371  | 1.051723  | 8.094227 |
| Ti | 8.255957  | 2.765580  | 7.895303 |
| O  | 10.077463 | 3.537573  | 7.764584 |
| O  | 9.734676  | 0.894418  | 8.177795 |
| O  | 9.685577  | 0.705374  | 4.280126 |
| O  | 10.049977 | 3.346875  | 3.802066 |
| O  | 11.855894 | 2.152757  | 5.892714 |
| Ti | 11.247019 | 1.774232  | 4.187022 |
| O  | 12.349055 | 0.124579  | 3.534150 |
| Ti | 11.229280 | 2.089104  | 7.737277 |
| O  | 12.801559 | 0.798124  | 8.145350 |
| Ti | 12.892734 | -1.098640 | 7.543629 |
| Ti | 12.528278 | -1.327485 | 4.754794 |
| O  | 12.515394 | -2.866825 | 8.409244 |
| Ti | 10.635861 | -3.725558 | 8.166577 |
| O  | 10.760743 | -3.992523 | 6.296658 |
| O  | 12.345037 | -3.065759 | 4.108164 |
| Ti | 10.656999 | -3.929536 | 4.451031 |
| O  | 11.414115 | -1.048887 | 6.304070 |

|    |            |           |          |
|----|------------|-----------|----------|
| O  | 9.641529   | -2.155551 | 8.646560 |
| Ti | 8.448872   | -0.658887 | 7.978304 |
| O  | 13.996089  | -1.264790 | 6.019918 |
| O  | 8.506941   | -1.004709 | 6.175660 |
| O  | 9.571155   | -2.502125 | 3.802633 |
| Ti | 8.458873   | -0.915996 | 4.274354 |
| Ti | -5.760790  | 3.778928  | 3.895401 |
| O  | -5.799830  | 3.825853  | 5.816552 |
| O  | -7.658004  | 3.182346  | 8.142617 |
| Ti | -5.909525  | 3.776419  | 7.675656 |
| O  | -4.462003  | 2.398343  | 3.544525 |
| Ti | -3.327632  | 0.825198  | 4.164004 |
| O  | -3.581562  | 1.071939  | 5.969867 |
| O  | -4.727147  | 2.439918  | 8.351894 |
| Ti | -3.373019  | 1.049963  | 7.898346 |
| O  | -1.894472  | -0.663697 | 8.341729 |
| O  | -1.959260  | -0.848199 | 4.171505 |
| O  | -1.586779  | 1.753425  | 3.778487 |
| O  | -1.632013  | 1.897122  | 7.808249 |
| Ti | -0.172267  | 0.308067  | 7.925066 |
| O  | -0.053687  | 0.081117  | 6.092525 |
| Ti | -0.174808  | 0.023185  | 4.174735 |
| Ti | -10.639135 | -1.322856 | 4.621633 |
| Ti | -10.273597 | -1.093640 | 7.410260 |
| O  | -10.261493 | 0.445316  | 3.756267 |
| Ti | -8.380136  | 1.303051  | 3.998423 |
| O  | -8.505963  | 1.570347  | 5.868175 |
| O  | -10.088902 | 0.644380  | 8.056839 |
| Ti | -8.400907  | 1.507978  | 7.713928 |
| O  | -9.160044  | -1.373724 | 5.860705 |
| O  | -7.469083  | 2.951313  | 3.746154 |
| O  | -7.386650  | -0.267507 | 3.518552 |
| Ti | -6.195424  | -1.765294 | 4.185994 |
| O  | -11.741862 | -1.155255 | 6.145640 |
| O  | -6.253435  | -1.418641 | 5.988557 |
| O  | -7.316482  | 0.079489  | 8.362682 |
| Ti | -6.205832  | -1.507352 | 7.889941 |
| Ti | -8.976930  | -4.511688 | 4.427198 |
| O  | -10.548306 | -3.219465 | 4.019631 |
| O  | -7.432715  | -3.128543 | 7.884477 |
| O  | -7.797267  | -5.769786 | 8.362742 |
| O  | -9.603304  | -4.575432 | 6.271965 |
| Ti | -8.994057  | -4.196872 | 7.977512 |
| O  | -10.095523 | -2.546576 | 8.630531 |
| O  | -7.481868  | -3.317629 | 3.986443 |
| O  | -4.874571  | -6.711136 | 3.785098 |
| O  | -4.677368  | -6.287272 | 8.337137 |
| O  | -4.839610  | -3.253553 | 8.340688 |
| Ti | -5.985576  | -4.872968 | 7.962494 |
| O  | -5.813401  | -4.965186 | 6.139082 |
| O  | -4.886483  | -3.475978 | 4.070524 |
| Ti | -6.003752  | -5.189220 | 4.268993 |



|    |           |            |          |
|----|-----------|------------|----------|
| O  | -7.825537 | -5.960339  | 4.398991 |
| O  | -4.524116 | -0.766872  | 3.713339 |
| O  | -4.463386 | -0.618213  | 7.903874 |
| O  | -1.755390 | -3.598975  | 8.395991 |
| Ti | -3.094212 | -2.256780  | 7.881681 |
| O  | -3.054864 | -2.546515  | 6.056411 |
| O  | -1.739125 | -3.844485  | 3.699470 |
| Ti | -3.114541 | -2.507717  | 4.149758 |
| O  | 1.137842  | -1.353282  | 3.688171 |
| Ti | 2.425449  | -2.731166  | 4.238728 |
| O  | 2.305042  | -2.504565  | 6.071363 |
| O  | 1.115627  | -1.069475  | 8.475837 |
| Ti | 2.427136  | -2.447330  | 7.988992 |
| O  | 3.839598  | -4.178127  | 8.383667 |
| O  | 3.885059  | -4.319966  | 4.357708 |
| O  | 4.147774  | -1.759939  | 3.822873 |
| O  | 4.211732  | -1.576008  | 7.992839 |
| O  | 9.725736  | -5.374081  | 8.419091 |
| Ti | 8.016389  | -6.199155  | 8.266317 |
| O  | 8.056578  | -6.246632  | 6.345893 |
| O  | 9.915200  | -5.604002  | 4.021427 |
| Ti | 8.166382  | -6.197942  | 4.486860 |
| O  | 7.218786  | -7.956692  | 8.766048 |
| O  | 6.716116  | -4.820570  | 8.618907 |
| Ti | 5.579969  | -3.248534  | 8.000742 |
| O  | 5.835679  | -3.495664  | 6.194834 |
| O  | 6.982231  | -4.862130  | 3.811626 |
| Ti | 5.626690  | -3.473423  | 4.267301 |
| Ti | -0.440523 | -5.253489  | 4.149756 |
| O  | -0.461628 | -5.161999  | 5.976099 |
| Ti | -0.512794 | -4.987739  | 7.902625 |
| Ti | -3.319408 | -7.997714  | 4.237121 |
| O  | -1.803294 | -6.617979  | 7.697794 |
| O  | -2.108613 | -9.239140  | 8.252612 |
| O  | -3.878376 | -8.115912  | 6.059934 |
| Ti | -3.369755 | -7.682550  | 7.817674 |
| O  | -1.744281 | -6.809276  | 3.972456 |
| Ti | 2.715383  | -10.237710 | 7.704450 |
| O  | 2.593384  | -11.285052 | 6.130540 |
| Ti | 2.959948  | -9.837218  | 4.911281 |
| O  | 3.086838  | -8.730270  | 6.481400 |
| O  | 1.542552  | -9.474328  | 3.689314 |
| O  | 0.938107  | -9.659571  | 8.255025 |
| O  | 0.841583  | -6.726729  | 8.361185 |
| Ti | -0.391246 | -8.251934  | 7.843249 |
| O  | -0.093475 | -8.453444  | 5.994446 |
| O  | 1.048754  | -6.989236  | 3.688545 |
| Ti | -0.346533 | -8.592784  | 4.151682 |
| O  | -2.081105 | -9.444559  | 4.205954 |
| O  | 1.277766  | -4.351617  | 3.726276 |
| O  | 1.216244  | -4.084515  | 8.032288 |
| Ti | 5.300953  | -8.303825  | 8.097295 |

|    |           |            |           |
|----|-----------|------------|-----------|
| O  | 5.870241  | -8.118827  | 6.310412  |
| O  | 7.450210  | -7.865104  | 3.895348  |
| Ti | 5.707308  | -8.288373  | 4.458778  |
| O  | 4.708234  | -9.914326  | 4.245907  |
| O  | 4.595312  | -10.147048 | 8.375903  |
| O  | 3.996010  | -7.012335  | 8.570756  |
| Ti | 2.596585  | -5.736037  | 7.955970  |
| O  | 2.570541  | -5.972368  | 6.095830  |
| O  | 4.384488  | -7.062330  | 3.860617  |
| Ti | 2.732674  | -5.981684  | 4.216250  |
| Ti | -2.156304 | 4.273644   | 10.626299 |
| O  | -1.955046 | 3.687354   | 12.447580 |
| O  | -3.419674 | 3.384526   | 14.946961 |
| Ti | -1.714324 | 3.840592   | 14.284155 |
| O  | -0.693432 | 5.464343   | 14.206184 |
| O  | -1.250919 | 5.944325   | 10.367056 |
| O  | -0.792676 | 3.019260   | 10.045822 |
| Ti | 0.895285  | 2.192468   | 10.795911 |
| O  | 0.968591  | 1.914184   | 12.713742 |
| O  | -0.357601 | 2.894390   | 15.189737 |
| Ti | 1.015288  | 1.782021   | 14.538407 |
| O  | 2.354633  | 0.228543   | 14.999185 |
| O  | 2.221364  | 0.485429   | 10.588339 |
| Ti | 0.650439  | 5.966742   | 10.412129 |
| O  | 0.852365  | 6.963056   | 12.022285 |
| Ti | 0.894797  | 5.506593   | 13.227622 |
| O  | 0.915984  | 4.295722   | 11.647601 |
| O  | 2.370325  | 5.360599   | 14.355733 |
| O  | 2.716920  | 6.049655   | 10.109948 |
| O  | 2.770096  | 3.018671   | 10.297766 |
| Ti | 3.968614  | 4.639459   | 10.594126 |
| O  | 4.129385  | 4.638532   | 12.425401 |
| O  | 2.842883  | 2.731474   | 14.873765 |
| Ti | 3.950763  | 4.265075   | 14.288671 |
| O  | 5.649804  | 4.910146   | 14.948753 |
| O  | 5.336611  | 2.541181   | 13.909533 |
| O  | 5.349987  | 2.816991   | 10.586119 |
| O  | 5.737978  | 5.514062   | 10.042495 |
| O  | 7.352326  | 4.298493   | 12.301974 |
| Ti | 6.881831  | 3.899307   | 10.510175 |
| Ti | 6.817120  | 3.714459   | 14.012814 |
| Ti | 4.027224  | 1.030153   | 14.328658 |
| O  | 4.038814  | 0.698978   | 12.516757 |
| Ti | 4.045459  | 1.211795   | 10.672487 |
| O  | -3.994875 | 3.927013   | 10.467148 |
| O  | 5.452235  | -0.078789  | 10.180420 |
| Ti | 6.716414  | -1.484711  | 10.769596 |
| O  | 6.591435  | -1.102489  | 12.621321 |
| O  | 5.359800  | 0.132608   | 15.307796 |
| Ti | 6.489957  | -1.116333  | 14.498782 |
| O  | 7.706903  | -2.695304  | 15.197704 |
| O  | 8.061462  | -3.141615  | 10.647288 |

|    |           |           |           |
|----|-----------|-----------|-----------|
| O  | 8.271188  | 2.781759  | 14.754723 |
| O  | 8.365291  | 2.654099  | 10.086507 |
| O  | 8.457987  | -0.456152 | 10.344530 |
| Ti | 9.609986  | 1.205733  | 10.497496 |
| O  | 9.499284  | 1.388873  | 12.355452 |
| O  | 8.297256  | -0.154166 | 14.820792 |
| Ti | 9.424390  | 1.357848  | 14.245426 |
| O  | 11.276853 | 1.958106  | 14.591572 |
| O  | 10.754647 | -0.531540 | 14.133004 |
| O  | 10.981907 | -0.510661 | 10.506349 |
| O  | 11.389249 | 2.096904  | 9.870798  |
| O  | 12.953252 | 1.057501  | 12.010401 |
| Ti | 12.568722 | 0.530360  | 10.251043 |
| O  | 13.671670 | -1.012891 | 9.633223  |
| Ti | 12.236184 | 0.607619  | 13.717332 |
| O  | 13.556754 | -0.664317 | 14.172887 |
| Ti | 13.329964 | -2.318725 | 13.293589 |
| Ti | 13.232346 | -2.798171 | 10.439509 |
| O  | 13.147077 | -3.711539 | 14.529408 |
| Ti | 11.489416 | -4.660941 | 14.728247 |
| O  | 11.526459 | -5.196631 | 12.892928 |
| O  | 13.540247 | -4.725496 | 10.488424 |
| Ti | 11.915931 | -5.393389 | 11.088640 |
| O  | 11.905386 | -2.291414 | 11.942008 |
| O  | 10.479050 | -3.247831 | 15.373463 |
| Ti | 9.401260  | -1.976931 | 14.470891 |
| O  | 14.524035 | -2.578380 | 11.894148 |
| O  | 9.355716  | -2.440263 | 12.707529 |
| O  | 10.947499 | -3.891259 | 10.295469 |
| Ti | 9.859309  | -2.204252 | 10.869594 |
| Ti | -4.694984 | 2.148238  | 10.649731 |
| O  | -4.459690 | 1.887899  | 12.543373 |
| O  | -6.045088 | 1.150970  | 14.966505 |
| Ti | -4.329868 | 1.790818  | 14.396021 |
| O  | -3.361802 | 0.823733  | 10.117217 |
| Ti | -1.974720 | -0.529729 | 10.640168 |
| O  | -2.005709 | -0.551029 | 12.537036 |
| O  | -3.145472 | 0.505635  | 15.034278 |
| Ti | -1.880870 | -0.740086 | 14.386472 |
| O  | -0.491620 | -2.381118 | 14.687685 |
| O  | -0.584476 | -2.226500 | 10.635036 |
| O  | -0.301798 | 0.483348  | 10.342748 |
| O  | -0.213732 | 0.207160  | 14.874249 |
| Ti | 1.181324  | -1.349915 | 14.439910 |
| O  | 1.329893  | -1.385263 | 12.604349 |
| Ti | 1.139159  | -1.219539 | 10.692222 |
| Ti | -9.360409 | -2.720115 | 10.791693 |
| Ti | -8.905921 | -2.890772 | 13.561096 |
| O  | -8.933054 | -0.895343 | 10.439722 |
| Ti | -7.185287 | -0.166247 | 10.632682 |
| O  | -6.786756 | -0.248375 | 12.500313 |
| O  | -8.505742 | -1.342723 | 14.502274 |

|    |            |           |           |
|----|------------|-----------|-----------|
| Ti | -6.788849  | -0.462513 | 14.339691 |
| O  | -7.832573  | -3.100615 | 11.984783 |
| O  | -6.490786  | 1.601883  | 10.418519 |
| O  | -6.053214  | -1.634406 | 10.049203 |
| Ti | -4.871227  | -3.124384 | 10.673275 |
| O  | -10.410946 | -2.712058 | 12.367940 |
| O  | -4.536055  | -2.550379 | 12.440154 |
| O  | -5.782702  | -1.845304 | 15.107949 |
| Ti | -4.654383  | -3.049369 | 14.224400 |
| Ti | -7.683658  | -5.838021 | 10.482832 |
| O  | -9.312188  | -4.569913 | 10.010953 |
| O  | -5.902278  | -4.524390 | 13.770019 |
| O  | -6.319235  | -6.923367 | 14.734207 |
| O  | -8.191646  | -6.218785 | 12.277360 |
| Ti | -7.406719  | -5.649372 | 13.867808 |
| O  | -8.745191  | -4.471475 | 14.557687 |
| O  | -6.181349  | -4.615885 | 10.301200 |
| O  | -3.640664  | -8.149376 | 9.898808  |
| O  | -3.290986  | -7.826048 | 14.772697 |
| O  | -3.532270  | -4.829165 | 14.800648 |
| Ti | -4.496652  | -6.441355 | 14.231629 |
| O  | -4.370223  | -6.576026 | 12.383322 |
| O  | -3.597298  | -4.817082 | 10.521585 |
| Ti | -4.666862  | -6.581603 | 10.510235 |
| O  | -6.478146  | -7.279360 | 10.403398 |
| O  | -3.155845  | -2.152276 | 10.168421 |
| O  | -2.975729  | -2.325113 | 14.982441 |
| O  | -0.598736  | -5.242715 | 15.183357 |
| Ti | -1.716182  | -3.941951 | 14.413182 |
| O  | -1.742214  | -4.023072 | 12.562295 |
| O  | -0.702625  | -5.347116 | 10.042025 |
| Ti | -1.808128  | -3.836789 | 10.645825 |
| O  | 2.495207   | -2.574179 | 10.173776 |
| Ti | 3.709337   | -4.003758 | 10.777403 |
| O  | 3.510801   | -3.671340 | 12.626185 |
| O  | 2.377890   | -2.492928 | 15.328598 |
| Ti | 3.546589   | -3.682088 | 14.502367 |
| O  | 4.931321   | -5.200657 | 15.102095 |
| O  | 5.109413   | -5.652043 | 10.803829 |
| O  | 5.454371   | -3.033897 | 10.372584 |
| O  | 5.239236   | -2.650361 | 14.702751 |
| O  | 10.774973  | -6.208037 | 15.520909 |
| Ti | 9.084749   | -6.894244 | 14.902243 |
| O  | 9.486431   | -7.132638 | 13.060322 |
| O  | 11.286869  | -7.035832 | 10.539253 |
| Ti | 9.552148   | -7.407006 | 11.222244 |
| O  | 8.130169   | -8.485295 | 15.220400 |
| O  | 7.890312   | -5.549017 | 15.286646 |
| Ti | 6.611553   | -4.307023 | 14.575680 |
| O  | 6.804594   | -4.550653 | 12.761981 |
| O  | 8.248412   | -6.179337 | 10.536573 |
| Ti | 6.860462   | -4.742317 | 10.838446 |

|    |           |            |           |
|----|-----------|------------|-----------|
| Ti | 0.750219  | -6.508940  | 10.686016 |
| O  | 0.857391  | -5.723484  | 12.404239 |
| Ti | 0.756934  | -6.116328  | 14.235125 |
| Ti | -2.014137 | -9.318926  | 10.389849 |
| O  | -0.415024 | -7.656775  | 13.632412 |
| O  | -0.758675 | -9.975462  | 14.803895 |
| O  | -2.527534 | -9.393582  | 12.230066 |
| Ti | -1.935372 | -8.775242  | 13.890804 |
| O  | -0.538258 | -8.060927  | 10.260637 |
| Ti | 3.960802  | -10.577117 | 13.404688 |
| O  | 4.160690  | -11.808163 | 11.994875 |
| Ti | 4.448696  | -10.556520 | 10.558016 |
| O  | 3.931864  | -9.171606  | 12.095481 |
| O  | 2.620255  | -10.861025 | 9.754718  |
| O  | 2.484766  | -10.512500 | 14.540303 |
| O  | 1.950156  | -7.789704  | 14.853820 |
| Ti | 0.959894  | -9.387714  | 14.163274 |
| O  | 0.964558  | -9.816604  | 12.325181 |
| O  | 2.047751  | -8.133631  | 10.526320 |
| Ti | 0.946456  | -9.910023  | 10.441762 |
| O  | -0.786374 | -10.765354 | 10.310134 |
| O  | 2.493453  | -5.555607  | 10.248892 |
| O  | 2.348538  | -5.234450  | 15.018807 |
| Ti | 6.526804  | -8.882198  | 14.262056 |
| O  | 6.960922  | -8.588270  | 12.456678 |
| O  | 9.099600  | -9.092384  | 10.585984 |
| Ti | 7.189990  | -9.184899  | 10.619939 |
| O  | 6.403816  | -10.853464 | 10.440137 |
| O  | 5.622418  | -10.536212 | 14.300736 |
| O  | 5.163004  | -7.891799  | 15.096273 |
| Ti | 3.726902  | -6.778528  | 14.604274 |
| O  | 3.699275  | -6.704879  | 12.786554 |
| O  | 5.295382  | -8.464729  | 10.251492 |
| Ti | 3.824570  | -7.257365  | 10.928358 |

anatase-like 3-D (2,1,2)-mer

|    |           |          |           |
|----|-----------|----------|-----------|
| Ti | -4.328024 | 6.428354 | -1.927390 |
| O  | -4.835881 | 6.037589 | -0.134857 |
| O  | -6.786973 | 6.752438 | 1.725197  |
| Ti | -4.881507 | 6.732031 | 1.737087  |
| O  | -4.132614 | 8.428283 | 1.787170  |
| O  | -3.495652 | 8.114458 | -1.947179 |
| O  | -2.950404 | 5.491985 | -2.812049 |
| Ti | -1.509568 | 4.341750 | -2.445558 |
| O  | -1.438009 | 4.225547 | -0.641220 |
| O  | -2.956376 | 6.037738 | 2.022078  |
| Ti | -1.544350 | 4.831305 | 1.227489  |
| O  | -0.154318 | 3.092002 | 1.723406  |
| O  | -0.118495 | 2.832035 | -2.954391 |
| Ti | -1.774932 | 8.165258 | -1.158055 |
| O  | -1.891459 | 9.377652 | 0.258733  |
| Ti | -2.197601 | 8.108874 | 1.704404  |

|    |           |           |           |
|----|-----------|-----------|-----------|
| O  | -1.719207 | 6.725510  | 0.099815  |
| O  | -0.384931 | 8.447485  | 2.504033  |
| O  | -0.341688 | 8.089048  | -2.356567 |
| O  | 0.280675  | 5.364702  | -2.661739 |
| Ti | 1.183688  | 6.985111  | -1.943258 |
| O  | 1.214854  | 7.544527  | -0.136966 |
| O  | 0.279246  | 5.676794  | 1.482529  |
| Ti | 1.269047  | 7.501872  | 1.747741  |
| O  | 3.002010  | 8.342819  | 1.915967  |
| O  | 2.822687  | 5.634250  | 1.857167  |
| O  | 2.514102  | 5.243470  | -1.223651 |
| O  | 2.909300  | 7.472548  | -2.626049 |
| O  | 4.748134  | 7.016661  | -0.070131 |
| Ti | 4.059941  | 6.302022  | -1.651824 |
| Ti | 4.256495  | 6.915136  | 1.777471  |
| Ti | 1.587724  | 4.079511  | 1.274346  |
| O  | 1.401412  | 3.061670  | -0.353030 |
| Ti | 1.467230  | 3.678823  | -2.102870 |
| O  | -5.836192 | 6.090581  | -3.043033 |
| O  | 2.857395  | 2.930381  | -3.100165 |
| Ti | 3.937827  | 1.537032  | -2.414554 |
| O  | 4.019598  | 1.563677  | -0.567478 |
| O  | 3.064654  | 2.945204  | 1.941374  |
| Ti | 4.090837  | 1.361916  | 1.347588  |
| O  | 5.456960  | -0.331944 | 1.820670  |
| O  | 5.210327  | -0.080105 | -2.983373 |
| O  | 5.896825  | 5.745775  | 2.249693  |
| O  | 5.375073  | 5.360881  | -2.595688 |
| O  | 5.762981  | 2.422205  | -2.777959 |
| Ti | 6.669430  | 4.032871  | -2.111816 |
| O  | 6.561798  | 4.179352  | -0.263786 |
| O  | 5.873334  | 2.364534  | 1.509153  |
| Ti | 6.894676  | 4.168535  | 1.608601  |
| O  | 8.703714  | 4.874254  | 1.720520  |
| O  | 8.431322  | 2.206679  | 1.799178  |
| O  | 8.079636  | 2.147103  | -1.646082 |
| O  | 8.484559  | 4.555971  | -2.607369 |
| O  | 10.400746 | 3.837365  | -0.164871 |
| Ti | 9.577801  | 3.283394  | -1.741979 |
| O  | 10.909523 | 2.113602  | -2.453081 |
| Ti | 9.919762  | 3.438467  | 1.637956  |
| O  | 11.554215 | 2.175793  | 2.098428  |
| Ti | 11.575020 | 0.323255  | 1.304992  |
| Ti | 11.087803 | 0.528456  | -1.461264 |
| O  | 11.199733 | -1.529563 | 1.595016  |
| Ti | 9.459091  | -2.274106 | 1.373692  |
| O  | 9.031462  | -2.180632 | -0.485673 |
| O  | 10.725188 | -1.009578 | -2.436817 |
| Ti | 9.018752  | -1.920276 | -2.319465 |
| O  | 10.022136 | 0.704406  | 0.128472  |
| O  | 8.321326  | -0.791181 | 1.951877  |
| Ti | 7.149158  | 0.703687  | 1.333065  |

|    |            |           |           |
|----|------------|-----------|-----------|
| O  | 12.604181  | 0.358825  | -0.289654 |
| O  | 6.787323   | 0.094450  | -0.428885 |
| O  | 8.028016   | -0.523504 | -3.090770 |
| Ti | 6.873939   | 0.648329  | -2.194234 |
| Ti | -6.894066  | 4.544121  | -2.795491 |
| O  | -7.379926  | 5.022726  | -1.025880 |
| O  | -8.781830  | 4.684865  | 1.640955  |
| Ti | -7.140960  | 5.164299  | 0.806800  |
| O  | -5.705707  | 3.169386  | -3.123807 |
| Ti | -4.396756  | 1.887142  | -2.540897 |
| O  | -4.571639  | 2.103551  | -0.722551 |
| O  | -5.947456  | 3.779963  | 1.487091  |
| Ti | -4.575819  | 2.302869  | 1.199188  |
| O  | -3.167792  | 0.581929  | 1.591715  |
| O  | -3.024715  | 0.243011  | -2.804071 |
| O  | -2.711351  | 2.801998  | -3.047985 |
| O  | -2.830136  | 3.196356  | 1.258069  |
| Ti | -1.404558  | 1.565092  | 1.166359  |
| O  | -1.311782  | 1.160498  | -0.677976 |
| Ti | -1.325526  | 1.250484  | -2.548209 |
| Ti | -11.053770 | -0.026694 | -1.026935 |
| Ti | -10.824342 | 0.517974  | 1.815726  |
| O  | -10.855814 | 1.432059  | -2.195952 |
| Ti | -9.148441  | 2.249734  | -2.403251 |
| O  | -8.815855  | 2.666743  | -0.577036 |
| O  | -11.042674 | 2.450490  | 1.634352  |
| Ti | -9.306856  | 2.968306  | 1.219214  |
| O  | -9.576463  | -0.135054 | 0.221632  |
| O  | -8.578876  | 3.793546  | -3.325421 |
| O  | -8.245722  | 0.830383  | -3.189394 |
| Ti | -7.148667  | -0.482660 | -2.385741 |
| O  | -12.184492 | 0.275922  | 0.402775  |
| O  | -6.997724  | -0.163875 | -0.599007 |
| O  | -8.640027  | 1.287859  | 2.015493  |
| Ti | -7.546281  | -0.275891 | 1.248762  |
| Ti | -10.017595 | -2.986765 | -1.525187 |
| O  | -11.310976 | -1.666543 | -1.933904 |
| O  | -8.661278  | -1.977718 | 1.585583  |
| O  | -9.187378  | -4.526534 | 2.294045  |
| O  | -10.732455 | -3.419218 | 0.195122  |
| Ti | -10.291028 | -2.884933 | 1.945833  |
| O  | -11.298174 | -1.299811 | 2.605997  |
| O  | -8.519039  | -1.911303 | -2.074521 |
| O  | -6.075382  | -5.213161 | -2.718041 |
| O  | -6.177847  | -5.212100 | 1.976551  |
| O  | -6.119273  | -2.099083 | 1.671853  |
| Ti | -7.366279  | -3.714777 | 1.581907  |
| O  | -7.248345  | -3.877506 | -0.278367 |
| O  | -6.053771  | -2.303110 | -2.778678 |
| Ti | -7.222772  | -3.787540 | -2.166055 |
| O  | -9.107432  | -4.374690 | -2.404503 |
| O  | -5.493829  | 0.274538  | -3.170036 |

|    |           |           |           |
|----|-----------|-----------|-----------|
| O  | -5.755634 | 0.679245  | 1.415806  |
| O  | -3.168498 | -2.404216 | 1.779609  |
| Ti | -4.432399 | -0.989005 | 1.188917  |
| O  | -4.253074 | -1.334409 | -0.662150 |
| O  | -3.104052 | -2.544860 | -3.362076 |
| Ti | -4.249768 | -1.314083 | -2.539258 |
| O  | -0.134543 | 0.084818  | -3.383777 |
| Ti | 1.062086  | -1.065640 | -2.501502 |
| O  | 0.939224  | -1.073452 | -0.665266 |
| O  | -0.196759 | 0.110423  | 1.757515  |
| Ti | 1.154304  | -1.251246 | 1.244721  |
| O  | 2.589749  | -2.957804 | 1.625971  |
| O  | 2.467806  | -2.616556 | -2.918509 |
| O  | 2.731788  | -0.019255 | -2.735320 |
| O  | 2.880779  | -0.255294 | 1.336705  |
| O  | 8.772496  | -4.053235 | 1.591188  |
| Ti | 6.992455  | -4.647223 | 1.372186  |
| O  | 6.756074  | -4.371064 | -0.527215 |
| O  | 8.292403  | -3.535331 | -2.959758 |
| Ti | 6.594636  | -4.216359 | -2.373512 |
| O  | 6.269657  | -6.411217 | 1.543998  |
| O  | 5.644805  | -3.343471 | 1.903112  |
| Ti | 4.280566  | -1.956853 | 1.353591  |
| O  | 4.268379  | -1.902169 | -0.550472 |
| O  | 5.408636  | -2.927550 | -3.005008 |
| Ti | 4.128999  | -1.676100 | -2.393461 |
| Ti | -1.774536 | -3.452701 | -2.385710 |
| O  | -1.753641 | -3.173619 | -0.563233 |
| Ti | -1.770822 | -3.691945 | 1.277917  |
| Ti | -4.591627 | -6.126046 | -2.008683 |
| O  | -3.104732 | -5.281364 | 1.423838  |
| O  | -3.486953 | -7.980851 | 1.967592  |
| O  | -5.092529 | -6.726821 | -0.295260 |
| Ti | -4.635479 | -6.368161 | 1.513421  |
| O  | -3.102720 | -4.951237 | -1.954820 |
| Ti | 1.587085  | -8.425637 | 1.585107  |
| O  | 1.377270  | -9.396701 | -0.044490 |
| Ti | 1.344779  | -7.929002 | -1.236597 |
| O  | 1.330045  | -6.735358 | 0.350785  |
| O  | -0.126365 | -7.762938 | -2.362386 |
| O  | -0.480918 | -8.521790 | 1.887277  |
| O  | -0.507290 | -5.492154 | 1.676001  |
| Ti | -1.728447 | -7.105669 | 1.403617  |
| O  | -1.892994 | -7.063062 | -0.434604 |
| O  | -0.591772 | -5.157655 | -2.904626 |
| Ti | -1.720654 | -6.675878 | -2.293260 |
| O  | -3.422844 | -7.329668 | -2.943091 |
| O  | -0.099954 | -2.654243 | -3.063350 |
| O  | 0.055021  | -2.950551 | 1.358459  |
| Ti | 4.419199  | -6.733806 | 1.346443  |
| O  | 4.230030  | -6.124999 | -0.466638 |
| O  | 5.681802  | -5.801834 | -2.956501 |



|    |           |           |           |
|----|-----------|-----------|-----------|
| Ti | 3.968620  | -6.255626 | -2.306299 |
| O  | 2.936564  | -7.872282 | -2.216568 |
| O  | 3.484054  | -8.400734 | 1.609941  |
| O  | 3.046774  | -5.475922 | 1.923217  |
| Ti | 1.364847  | -4.643904 | 1.161397  |
| O  | 1.304059  | -4.360021 | -0.761634 |
| O  | 2.627716  | -5.305139 | -3.230318 |
| Ti | 1.241693  | -4.202607 | -2.582525 |
| Ti | -2.936586 | 5.738537  | 4.245018  |
| O  | -3.598708 | 5.164626  | 5.981828  |
| O  | -5.476747 | 5.634977  | 8.169753  |
| Ti | -3.602887 | 5.649541  | 7.799415  |
| O  | -2.754317 | 7.364789  | 7.836594  |
| O  | -2.400963 | 7.679413  | 3.866120  |
| O  | -1.646607 | 4.515518  | 3.467447  |
| Ti | -0.258380 | 3.203824  | 3.966472  |
| O  | -0.287492 | 3.271825  | 5.829404  |
| O  | -1.647069 | 4.985146  | 8.099735  |
| Ti | -0.385532 | 3.500684  | 7.692646  |
| O  | 1.002302  | 1.837758  | 8.190382  |
| O  | 1.127631  | 1.559580  | 3.901703  |
| Ti | -0.530782 | 7.728716  | 4.530022  |
| O  | -0.393381 | 8.550741  | 6.198906  |
| Ti | -0.939900 | 7.040859  | 7.339031  |
| O  | -1.100453 | 6.111181  | 5.556073  |
| O  | 0.613767  | 7.015120  | 8.556421  |
| O  | 1.185617  | 7.064804  | 3.878664  |
| O  | 1.481369  | 4.230631  | 3.657308  |
| Ti | 2.652334  | 5.786114  | 4.273515  |
| O  | 2.345228  | 6.139918  | 6.087426  |
| O  | 1.328369  | 4.485549  | 7.945313  |
| Ti | 2.469152  | 6.217802  | 7.966351  |
| O  | 4.229155  | 7.072192  | 7.977814  |
| O  | 3.976609  | 4.428728  | 8.165958  |
| O  | 4.069174  | 4.179321  | 4.412698  |
| O  | 4.358598  | 6.818004  | 3.898486  |
| O  | 6.090605  | 5.723739  | 6.096154  |
| Ti | 5.628720  | 5.267751  | 4.333814  |
| Ti | 5.490089  | 5.654368  | 7.924673  |
| Ti | 2.703070  | 2.869553  | 7.774079  |
| O  | 2.858750  | 2.560176  | 5.982853  |
| Ti | 2.830790  | 2.520566  | 4.053099  |
| O  | -4.848072 | 5.487116  | 3.460534  |
| O  | 4.023147  | 1.088670  | 3.548011  |
| Ti | 5.354254  | -0.236998 | 4.116828  |
| O  | 5.238865  | 0.057479  | 5.944541  |
| O  | 4.067623  | 1.569535  | 8.385990  |
| Ti | 5.285881  | 0.127940  | 7.851535  |
| O  | 6.682824  | -1.581180 | 8.264410  |
| O  | 6.734174  | -1.873109 | 4.095464  |
| O  | 7.100217  | 4.432984  | 8.379588  |
| O  | 6.898941  | 3.847827  | 3.769982  |

|    |            |           |          |
|----|------------|-----------|----------|
| O  | 7.070965   | 0.822894  | 3.689819 |
| Ti | 8.216672   | 2.432004  | 4.140219 |
| O  | 8.071372   | 2.597547  | 5.961961 |
| O  | 7.023667   | 1.181610  | 7.966504 |
| Ti | 8.202686   | 2.892564  | 7.844442 |
| O  | 10.079511  | 3.541070  | 7.721482 |
| O  | 9.683339   | 0.939801  | 8.138457 |
| O  | 9.674086   | 0.714954  | 4.158995 |
| O  | 10.037575  | 3.356779  | 3.758206 |
| O  | 11.851293  | 2.145070  | 5.858895 |
| Ti | 11.234520  | 1.790299  | 4.136171 |
| O  | 12.313462  | 0.126829  | 3.430525 |
| Ti | 11.225947  | 2.073422  | 7.707739 |
| O  | 12.807773  | 0.770994  | 8.244681 |
| Ti | 12.840542  | -1.082013 | 7.506358 |
| Ti | 12.462184  | -1.264548 | 4.733091 |
| O  | 12.400314  | -2.937329 | 7.835733 |
| Ti | 10.608582  | -3.519291 | 7.949434 |
| O  | 10.057311  | -3.917914 | 6.182990 |
| O  | 12.229300  | -3.073164 | 4.258369 |
| Ti | 10.526877  | -3.922815 | 4.387078 |
| O  | 11.355328  | -0.849674 | 6.229047 |
| O  | 9.507630   | -2.019101 | 8.406201 |
| Ti | 8.316708   | -0.500229 | 7.785258 |
| O  | 13.946066  | -1.149551 | 5.950740 |
| O  | 8.383435   | -0.819087 | 5.984716 |
| O  | 9.552712   | -2.489191 | 3.604302 |
| Ti | 8.440754   | -0.910228 | 4.085548 |
| Ti | -5.852855  | 3.724194  | 3.693196 |
| O  | -6.249035  | 4.308337  | 5.484015 |
| O  | -7.779812  | 3.610453  | 8.116514 |
| Ti | -6.166383  | 4.123022  | 7.295569 |
| O  | -4.493418  | 2.367987  | 3.415858 |
| Ti | -3.286989  | 0.782383  | 3.883903 |
| O  | -3.583642  | 1.093666  | 5.702128 |
| O  | -4.915492  | 2.645736  | 7.822254 |
| Ti | -3.509041  | 1.176227  | 7.581592 |
| O  | -2.057877  | -0.547489 | 8.134473 |
| O  | -1.912562  | -0.900220 | 3.948486 |
| O  | -1.537507  | 1.678850  | 3.519102 |
| O  | -1.725821  | 1.988584  | 7.744186 |
| Ti | -0.278938  | 0.317689  | 7.689069 |
| O  | -0.161793  | 0.052438  | 5.874068 |
| Ti | -0.123204  | -0.041230 | 3.933617 |
| Ti | -10.538610 | -1.201757 | 4.673396 |
| Ti | -9.780186  | -0.728071 | 7.429705 |
| O  | -10.268369 | 0.626787  | 3.857858 |
| Ti | -8.263164  | 1.039963  | 4.244283 |
| O  | -7.728352  | 1.555903  | 6.037555 |
| O  | -9.888624  | 1.094056  | 7.961335 |
| Ti | -8.083696  | 1.751364  | 7.854026 |
| O  | -8.877894  | -0.859973 | 5.613552 |

|    |            |           |          |
|----|------------|-----------|----------|
| O  | -7.465877  | 2.709999  | 3.672252 |
| O  | -7.336426  | -0.468858 | 3.424301 |
| Ti | -6.067398  | -1.907351 | 3.974143 |
| O  | -11.382465 | -1.082943 | 6.316892 |
| O  | -5.983455  | -1.620566 | 5.792813 |
| O  | -7.671328  | -0.309435 | 8.113514 |
| Ti | -6.219353  | -1.595084 | 7.654045 |
| Ti | -8.956399  | -4.552474 | 4.394166 |
| O  | -10.395568 | -3.086364 | 4.089018 |
| O  | -7.470887  | -3.205406 | 7.603214 |
| O  | -7.973430  | -5.716643 | 8.395988 |
| O  | -9.685180  | -4.563490 | 6.221109 |
| Ti | -9.112676  | -4.130208 | 7.921147 |
| O  | -9.890933  | -2.338552 | 8.560202 |
| O  | -7.405343  | -3.423814 | 3.905899 |
| O  | -4.885273  | -6.800921 | 3.641355 |
| O  | -4.912526  | -6.420910 | 8.249920 |
| O  | -4.885335  | -3.297330 | 8.140279 |
| Ti | -6.134245  | -4.911274 | 7.844894 |
| O  | -5.778512  | -5.116882 | 6.045177 |
| O  | -4.775313  | -3.627890 | 3.893176 |
| Ti | -5.980409  | -5.263464 | 4.176645 |
| O  | -7.840733  | -6.012245 | 4.393904 |
| O  | -4.451286  | -0.840197 | 3.491893 |
| O  | -4.585764  | -0.510427 | 7.793691 |
| O  | -1.849404  | -3.541810 | 8.184922 |
| Ti | -3.191029  | -2.185168 | 7.677944 |
| O  | -3.038632  | -2.482958 | 5.868215 |
| O  | -1.666059  | -3.881613 | 3.493176 |
| Ti | -3.036851  | -2.568196 | 3.946932 |
| O  | 1.170863   | -1.425550 | 3.463504 |
| Ti | 2.459168   | -2.793501 | 4.041760 |
| O  | 2.293617   | -2.499762 | 5.868995 |
| O  | 1.011143   | -1.064442 | 8.266703 |
| Ti | 2.376369   | -2.413296 | 7.784421 |
| O  | 3.794026   | -4.153086 | 8.168775 |
| O  | 3.916759   | -4.379900 | 4.191070 |
| O  | 4.191461   | -1.843798 | 3.639550 |
| O  | 4.156619   | -1.561553 | 7.830782 |
| O  | 10.051469  | -5.290284 | 8.690720 |
| Ti | 8.223411   | -6.140384 | 8.237698 |
| O  | 8.414773   | -6.369696 | 6.365004 |
| O  | 9.992337   | -5.658382 | 3.892359 |
| Ti | 8.268705   | -6.246991 | 4.471792 |
| O  | 7.141025   | -7.831115 | 8.712759 |
| O  | 6.936729   | -4.747009 | 8.421611 |
| Ti | 5.569951   | -3.258470 | 7.840174 |
| O  | 5.858214   | -3.589111 | 6.047507 |
| O  | 7.076135   | -4.945428 | 3.734794 |
| Ti | 5.678363   | -3.564860 | 4.122258 |
| Ti | -0.412870  | -5.328102 | 3.960085 |
| O  | -0.541458  | -5.196265 | 5.792050 |

|    |           |            |           |
|----|-----------|------------|-----------|
| Ti | -0.599904 | -4.956909  | 7.702344  |
| Ti | -3.318289 | -8.043155  | 4.103216  |
| O  | -1.891960 | -6.595759  | 7.633246  |
| O  | -2.214709 | -9.219592  | 8.189610  |
| O  | -3.863302 | -8.123832  | 5.941221  |
| Ti | -3.450586 | -7.663454  | 7.723219  |
| O  | -1.739879 | -6.866403  | 3.795976  |
| Ti | 2.754486  | -10.096336 | 7.567923  |
| O  | 2.630374  | -11.235753 | 6.032880  |
| Ti | 2.915252  | -9.820530  | 4.772483  |
| O  | 2.789142  | -8.614684  | 6.213348  |
| O  | 1.504023  | -9.552106  | 3.498159  |
| O  | 0.888237  | -9.688644  | 8.153726  |
| O  | 0.763006  | -6.712624  | 8.161985  |
| Ti | -0.459391 | -8.273950  | 7.709849  |
| O  | -0.232049 | -8.476595  | 5.857029  |
| O  | 1.047098  | -7.055853  | 3.510106  |
| Ti | -0.355322 | -8.662935  | 3.988299  |
| O  | -2.099392 | -9.507683  | 4.050000  |
| O  | 1.291507  | -4.400453  | 3.537252  |
| O  | 1.137200  | -4.044762  | 7.820912  |
| Ti | 5.354043  | -8.155099  | 7.941305  |
| O  | 5.796011  | -7.675403  | 6.162003  |
| O  | 7.515868  | -7.896574  | 3.889814  |
| Ti | 5.716907  | -8.204896  | 4.377093  |
| O  | 4.729033  | -9.825675  | 4.233390  |
| O  | 4.650282  | -9.906566  | 7.881413  |
| O  | 3.959677  | -6.895254  | 8.354895  |
| Ti | 2.496738  | -5.682349  | 7.721556  |
| O  | 2.478950  | -5.921976  | 5.876206  |
| O  | 4.401373  | -7.066759  | 3.613047  |
| Ti | 2.738314  | -6.022456  | 4.004147  |
| Ti | -1.971850 | 4.522268   | 10.305341 |
| O  | -2.414357 | 4.042117   | 12.084477 |
| O  | -4.133698 | 4.263417   | 14.357119 |
| Ti | -2.335049 | 4.572104   | 13.869318 |
| O  | -1.347419 | 6.193188   | 14.012905 |
| O  | -1.268003 | 6.273648   | 10.365375 |
| O  | -0.578659 | 3.261114   | 9.891436  |
| Ti | 0.883842  | 2.047424   | 10.524280 |
| O  | 0.901663  | 2.287186   | 12.369592 |
| O  | -1.019134 | 3.434331   | 14.633445 |
| Ti | 0.642535  | 2.388513   | 14.241823 |
| O  | 2.089091  | 0.765851   | 14.709011 |
| O  | 2.243572  | 0.410212   | 10.424340 |
| Ti | 0.627658  | 6.463197   | 10.679096 |
| O  | 0.752521  | 7.602051   | 12.214592 |
| Ti | 0.466378  | 6.186575   | 13.474383 |
| O  | 0.592238  | 4.981033   | 12.033097 |
| O  | 1.876893  | 5.917218   | 14.749607 |
| O  | 2.493295  | 6.054705   | 10.092458 |
| O  | 2.614701  | 3.078049   | 10.083914 |

|    |           |           |           |
|----|-----------|-----------|-----------|
| Ti | 3.840300  | 4.639441  | 10.536283 |
| O  | 3.612565  | 4.842690  | 12.388983 |
| O  | 2.333994  | 3.421141  | 14.735421 |
| Ti | 3.735411  | 5.027461  | 14.257874 |
| O  | 5.479607  | 5.872677  | 14.196701 |
| O  | 5.120688  | 3.231306  | 14.450390 |
| O  | 5.272586  | 2.961282  | 10.613184 |
| O  | 5.595787  | 5.585421  | 10.056629 |
| O  | 7.243669  | 4.489268  | 12.305329 |
| Ti | 6.832564  | 4.029121  | 10.523301 |
| Ti | 6.698774  | 4.408593  | 14.143431 |
| Ti | 3.793332  | 1.693370  | 14.285644 |
| O  | 3.921577  | 1.561699  | 12.453716 |
| Ti | 3.980570  | 1.322053  | 10.543291 |
| O  | -3.759424 | 4.198129  | 9.533537  |
| O  | 5.230255  | -0.092587 | 10.061139 |
| Ti | 6.571300  | -1.449678 | 10.568206 |
| O  | 6.419337  | -1.152278 | 12.378074 |
| O  | 5.046933  | 0.247420  | 14.752857 |
| Ti | 6.417057  | -1.066668 | 14.299337 |
| O  | 7.831699  | -2.794510 | 14.754241 |
| O  | 7.966773  | -3.124087 | 10.452772 |
| O  | 8.265897  | 3.166921  | 14.605281 |
| O  | 8.293209  | 2.786810  | 9.996480  |
| O  | 8.265869  | -0.337376 | 10.106160 |
| Ti | 9.514666  | 1.276867  | 10.401644 |
| O  | 9.157824  | 1.482085  | 12.201314 |
| O  | 8.155617  | -0.006932 | 14.353154 |
| Ti | 9.360440  | 1.629025  | 14.069649 |
| O  | 11.220560 | 2.378380  | 13.852218 |
| O  | 10.785672 | -0.210223 | 14.340661 |
| O  | 10.852218 | -0.427518 | 10.643294 |
| O  | 11.353667 | 2.082749  | 9.850601  |
| O  | 13.065236 | 0.929828  | 12.025385 |
| Ti | 12.493043 | 0.496370  | 10.325582 |
| O  | 13.272110 | -1.294378 | 9.686487  |
| Ti | 12.336461 | 0.918724  | 13.852505 |
| O  | 13.775950 | -0.546489 | 14.157980 |
| Ti | 13.920356 | -2.431073 | 13.573588 |
| Ti | 13.161726 | -2.905097 | 10.817092 |
| O  | 13.650846 | -4.259538 | 14.389553 |
| Ti | 11.645659 | -4.672612 | 14.002392 |
| O  | 11.111670 | -5.189074 | 12.208797 |
| O  | 13.271249 | -4.726921 | 10.285151 |
| Ti | 11.466025 | -5.384371 | 10.392464 |
| O  | 12.259632 | -2.773814 | 12.633565 |
| O  | 10.718139 | -3.164414 | 14.822814 |
| Ti | 9.447742  | -1.727300 | 14.272292 |
| O  | 14.764063 | -2.549269 | 11.929871 |
| O  | 9.365169  | -2.014600 | 12.453738 |
| O  | 11.053430 | -3.323659 | 10.132963 |
| Ti | 9.600058  | -2.039257 | 10.592296 |

|    |            |           |           |
|----|------------|-----------|-----------|
| Ti | -4.841163  | 2.507419  | 10.008592 |
| O  | -5.032835  | 2.737105  | 11.881275 |
| O  | -6.610076  | 2.025305  | 14.354069 |
| Ti | -4.886484  | 2.614108  | 13.774473 |
| O  | -3.555733  | 1.113033  | 9.824713  |
| Ti | -2.189485  | -0.376288 | 10.405812 |
| O  | -2.477543  | -0.045501 | 12.198567 |
| O  | -3.694290  | 1.311832  | 14.511132 |
| Ti | -2.297770  | -0.069742 | 14.123751 |
| O  | -0.810576  | -1.790371 | 14.606343 |
| O  | -0.776038  | -2.072984 | 10.415618 |
| O  | -0.413624  | 0.518588  | 10.077213 |
| O  | -0.536250  | 0.745826  | 14.055723 |
| Ti | 0.921471   | -0.840456 | 14.204310 |
| O  | 1.086510   | -1.132892 | 12.377059 |
| Ti | 1.004155   | -1.221320 | 10.461579 |
| Ti | -9.459046  | -2.551269 | 10.740133 |
| Ti | -9.080492  | -2.369018 | 13.513373 |
| O  | -9.017893  | -0.696056 | 10.410853 |
| Ti | -7.226258  | -0.113982 | 10.296915 |
| O  | -6.674493  | 0.284766  | 12.063286 |
| O  | -8.846652  | -0.560145 | 13.987862 |
| Ti | -7.144903  | 0.289686  | 13.859074 |
| O  | -7.973986  | -2.784453 | 12.017378 |
| O  | -6.669255  | 1.657160  | 9.555647  |
| O  | -6.126259  | -1.614888 | 9.840150  |
| Ti | -4.936117  | -3.134501 | 10.461116 |
| O  | -10.564583 | -2.483024 | 12.295709 |
| O  | -5.002607  | -2.815198 | 12.261645 |
| O  | -6.170784  | -1.144279 | 14.641924 |
| Ti | -5.059969  | -2.724253 | 14.160768 |
| Ti | -7.845720  | -5.707394 | 10.538832 |
| O  | -9.427225  | -4.404296 | 10.002117 |
| O  | -6.291953  | -4.347388 | 14.087287 |
| O  | -6.657112  | -6.991113 | 14.487954 |
| O  | -8.471089  | -5.779292 | 12.387257 |
| Ti | -7.854010  | -5.424551 | 14.110099 |
| O  | -8.932507  | -3.760349 | 14.815827 |
| O  | -6.302934  | -4.574033 | 10.107970 |
| O  | -3.719536  | -8.067217 | 9.866769  |
| O  | -3.517754  | -7.482403 | 14.476079 |
| O  | -3.690585  | -4.457420 | 14.556315 |
| Ti | -4.835979  | -6.066686 | 14.106161 |
| O  | -4.691049  | -6.232281 | 12.284250 |
| O  | -3.643074  | -4.816234 | 10.279806 |
| Ti | -4.822281  | -6.527149 | 10.401906 |
| O  | -6.699202  | -7.175090 | 10.524695 |
| O  | -3.302061  | -2.053606 | 9.981705  |
| O  | -3.353127  | -1.761560 | 14.150672 |
| O  | -0.642507  | -4.723474 | 14.698221 |
| Ti | -1.977887  | -3.397956 | 14.129155 |
| O  | -1.858165  | -3.692495 | 12.301551 |

|    |           |            |           |
|----|-----------|------------|-----------|
| O  | -0.686363 | -5.203496  | 9.859773  |
| Ti | -1.905376 | -3.762636  | 10.394550 |
| O  | 2.369238  | -2.570247  | 9.979386  |
| Ti | 3.659302  | -3.952189  | 10.556899 |
| O  | 3.542199  | -3.687714  | 12.371960 |
| O  | 2.209275  | -2.209150  | 14.782403 |
| Ti | 3.503300  | -3.593603  | 14.312464 |
| O  | 4.917469  | -5.313570  | 14.727355 |
| O  | 5.106479  | -5.622868  | 10.501933 |
| O  | 5.438549  | -3.086848  | 10.111633 |
| O  | 5.292624  | -2.734427  | 14.297911 |
| O  | 10.846207 | -6.342309  | 14.572849 |
| Ti | 9.234381  | -7.356919  | 14.552510 |
| O  | 9.630464  | -7.941529  | 12.761902 |
| O  | 11.162136 | -7.243473  | 10.129729 |
| Ti | 9.548512  | -7.756099  | 10.950258 |
| O  | 8.231264  | -9.119890  | 14.786146 |
| O  | 7.873629  | -6.001967  | 14.830528 |
| Ti | 6.666912  | -4.416961  | 14.362465 |
| O  | 6.963417  | -4.727957  | 12.544107 |
| O  | 8.297349  | -6.278987  | 10.424025 |
| Ti | 6.889774  | -4.810634  | 10.664657 |
| Ti | 0.677339  | -6.503894  | 10.472150 |
| O  | 0.521663  | -6.194596  | 12.263604 |
| Ti | 0.549729  | -6.155928  | 14.193224 |
| Ti | -2.109058 | -9.288594  | 10.321567 |
| O  | -0.688351 | -7.814262  | 13.833260 |
| O  | -0.977686 | -10.452863 | 14.347487 |
| O  | -2.709799 | -9.358659  | 12.150010 |
| Ti | -2.247825 | -8.902468  | 13.912284 |
| O  | -0.595871 | -8.062946  | 10.080423 |
| Ti | 3.913257  | -11.362047 | 13.716320 |
| O  | 3.776033  | -12.184162 | 12.047701 |
| Ti | 4.321955  | -10.674496 | 10.907216 |
| O  | 4.482382  | -9.744511  | 12.690073 |
| O  | 2.768127  | -10.648467 | 9.690405  |
| O  | 2.196261  | -10.699093 | 14.367376 |
| O  | 1.898953  | -7.865458  | 14.589515 |
| Ti | 0.728762  | -9.421218  | 13.972791 |
| O  | 1.035560  | -9.774498  | 12.158868 |
| O  | 2.056462  | -8.119207  | 10.301113 |
| Ti | 0.911622  | -9.852009  | 10.279819 |
| O  | -0.848069 | -10.706426 | 10.268061 |
| O  | 2.378513  | -5.471860  | 10.055649 |
| O  | 2.252742  | -5.194411  | 14.344596 |
| Ti | 6.318958  | -9.372099  | 14.001631 |
| O  | 6.980609  | -8.798339  | 12.264562 |
| O  | 8.858920  | -9.268132  | 10.076520 |
| Ti | 6.984993  | -9.282674  | 10.446879 |
| O  | 6.136545  | -10.997914 | 10.409301 |
| O  | 5.783682  | -11.312948 | 14.379897 |
| O  | 5.027384  | -8.150085  | 14.778789 |

|    |           |           |           |
|----|-----------|-----------|-----------|
| Ti | 3.638530  | -6.839219 | 14.280087 |
| O  | 3.667609  | -6.906291 | 12.416966 |
| O  | 5.029117  | -8.618184 | 10.146776 |
| Ti | 3.765986  | -7.135364 | 10.553767 |
| Ti | -1.037443 | 3.101425  | 16.900260 |
| O  | -0.848715 | 2.492273  | 18.713531 |
| O  | -2.300669 | 2.168452  | 21.203517 |
| Ti | -0.587521 | 2.622454  | 20.553197 |
| O  | 0.444744  | 4.238992  | 20.464425 |
| O  | -0.102880 | 4.768343  | 16.637769 |
| O  | 0.334383  | 1.842985  | 16.323242 |
| Ti | 2.015487  | 1.009791  | 17.085066 |
| O  | 2.076199  | 0.725819  | 19.007837 |
| O  | 0.752937  | 1.670870  | 21.476732 |
| Ti | 2.138897  | 0.568079  | 20.828760 |
| O  | 3.480446  | -0.980257 | 21.309362 |
| O  | 3.325284  | -0.683654 | 16.887529 |
| Ti | 1.794244  | 4.792736  | 16.663374 |
| O  | 2.004162  | 5.763593  | 18.292721 |
| Ti | 2.036060  | 4.295266  | 19.484630 |
| O  | 2.050730  | 3.102114  | 17.896862 |
| O  | 3.507578  | 4.128964  | 20.610407 |
| O  | 3.861437  | 4.887166  | 16.359434 |
| O  | 3.887269  | 1.857688  | 16.570127 |
| Ti | 5.108923  | 3.470790  | 16.843229 |
| O  | 5.273000  | 3.428230  | 18.680257 |
| O  | 3.971921  | 1.523298  | 21.151076 |
| Ti | 5.101365  | 3.041342  | 20.540086 |
| O  | 6.803487  | 3.696198  | 21.189088 |
| O  | 6.483559  | 1.317179  | 20.201798 |
| O  | 6.485092  | 1.647163  | 16.822335 |
| O  | 6.867229  | 4.346403  | 16.279117 |
| O  | 8.473187  | 3.093065  | 18.540810 |
| Ti | 8.015508  | 2.733967  | 16.733059 |
| Ti | 7.972230  | 2.489824  | 20.257565 |
| Ti | 5.155001  | -0.181323 | 20.632120 |
| O  | 5.134227  | -0.459538 | 18.809511 |
| Ti | 5.151146  | 0.057412  | 16.968050 |
| O  | -2.888257 | 2.778046  | 16.702211 |
| O  | 6.548686  | -1.230448 | 16.466721 |
| Ti | 7.812731  | -2.645779 | 17.057225 |
| O  | 7.633846  | -2.300234 | 18.908278 |
| O  | 6.484523  | -1.089422 | 21.608135 |
| Ti | 7.630082  | -2.320192 | 20.785415 |
| O  | 8.874466  | -3.908619 | 21.416063 |
| O  | 9.136479  | -4.313471 | 16.831126 |
| O  | 9.455799  | 1.579826  | 20.964550 |
| O  | 9.558055  | 1.577895  | 16.269789 |
| O  | 9.499683  | -1.535556 | 16.574637 |
| Ti | 10.746352 | 0.080177  | 16.664656 |
| O  | 10.627852 | 0.243744  | 18.524808 |
| O  | 9.433923  | -1.330987 | 21.024930 |



|    |           |           |           |
|----|-----------|-----------|-----------|
| Ti | 10.602413 | 0.153791  | 20.412880 |
| O  | 12.486927 | 0.741980  | 20.651267 |
| O  | 11.899082 | -1.721768 | 20.320607 |
| O  | 12.042052 | -1.655851 | 16.661450 |
| O  | 12.567253 | 0.893084  | 15.952732 |
| O  | 14.112385 | -0.213465 | 18.051809 |
| Ti | 13.671332 | -0.748122 | 16.301332 |
| O  | 14.679880 | -2.332078 | 15.641062 |
| Ti | 13.397458 | -0.645689 | 19.772334 |
| O  | 14.690904 | -1.965734 | 20.181572 |
| Ti | 14.434826 | -3.604976 | 19.274708 |
| Ti | 14.206686 | -4.150067 | 16.431609 |
| O  | 14.237755 | -5.063845 | 20.444045 |
| Ti | 12.530761 | -5.881809 | 20.652174 |
| O  | 12.199780 | -6.299761 | 18.825477 |
| O  | 14.426783 | -6.082061 | 16.614015 |
| Ti | 12.691491 | -6.600108 | 17.029666 |
| O  | 12.957780 | -3.498846 | 18.025109 |
| O  | 11.627068 | -4.462892 | 21.437428 |
| Ti | 10.529333 | -3.151847 | 20.632372 |
| O  | 15.566289 | -3.909026 | 17.845058 |
| O  | 10.379817 | -3.471462 | 18.845955 |
| O  | 12.022406 | -4.922180 | 16.231041 |
| Ti | 10.927389 | -3.358752 | 16.997804 |
| Ti | -3.610534 | 1.014143  | 16.873995 |
| O  | -3.374094 | 0.737976  | 18.773450 |
| O  | -4.910313 | -0.098569 | 21.206333 |
| Ti | -3.212778 | 0.582813  | 20.619778 |
| O  | -2.263756 | -0.290556 | 16.343000 |
| Ti | -0.900256 | -1.677777 | 16.892519 |
| O  | -0.887838 | -1.732511 | 18.796309 |
| O  | -2.027131 | -0.706374 | 21.250914 |
| Ti | -0.748584 | -1.958652 | 20.639300 |
| O  | 0.649051  | -3.615853 | 20.980926 |
| O  | 0.499611  | -3.379231 | 16.909222 |
| O  | 0.790501  | -0.676344 | 16.620145 |
| O  | 0.912699  | -1.018053 | 21.164495 |
| Ti | 2.318524  | -2.568650 | 20.747345 |
| O  | 2.441250  | -2.560375 | 18.911137 |
| Ti | 2.226025  | -2.382952 | 17.001128 |
| Ti | -8.193355 | -3.956841 | 16.940759 |
| Ti | -7.705745 | -4.162625 | 19.706826 |
| O  | -7.817675 | -2.103996 | 16.650994 |
| Ti | -6.077210 | -1.359034 | 16.872416 |
| O  | -5.649711 | -1.452340 | 18.731928 |
| O  | -7.342908 | -2.624564 | 20.682833 |
| Ti | -5.636660 | -1.713239 | 20.565670 |
| O  | -6.640162 | -4.338394 | 18.117025 |
| O  | -5.390478 | 0.420202  | 16.655077 |
| O  | -4.940097 | -2.842537 | 16.294441 |
| Ti | -3.769007 | -4.338234 | 16.913189 |
| O  | -9.222187 | -3.992341 | 18.535577 |

|    |           |            |           |
|----|-----------|------------|-----------|
| O  | -3.406491 | -3.727588  | 18.675112 |
| O  | -4.646657 | -3.110811  | 21.336981 |
| Ti | -3.493164 | -4.282830  | 20.440013 |
| Ti | -6.539295 | -7.072808  | 16.608180 |
| O  | -8.173386 | -5.809410  | 16.147910 |
| O  | -4.698398 | -5.781470  | 19.890777 |
| O  | -5.103006 | -8.189776  | 20.854095 |
| O  | -7.019882 | -7.472326  | 18.410979 |
| Ti | -6.196399 | -6.917769  | 19.987715 |
| O  | -7.528128 | -5.747704  | 20.698471 |
| O  | -5.050800 | -5.841088  | 16.447056 |
| O  | -2.515437 | -9.380254  | 15.996529 |
| O  | -1.991398 | -8.993480  | 20.840371 |
| O  | -2.382465 | -6.056506  | 21.024328 |
| Ti | -3.288102 | -7.667220  | 20.357820 |
| O  | -3.181351 | -7.814376  | 18.509787 |
| O  | -2.493027 | -5.999047  | 16.737214 |
| Ti | -3.513950 | -7.803260  | 16.637299 |
| O  | -5.322974 | -8.508602  | 16.525122 |
| O  | -2.076292 | -3.302603  | 16.425324 |
| O  | -1.829375 | -3.554537  | 21.229527 |
| O  | 0.522880  | -6.565998  | 21.345103 |
| Ti | -0.557103 | -5.171784  | 20.660484 |
| O  | -0.637392 | -5.198434  | 18.813534 |
| O  | 0.315911  | -6.580049  | 16.305229 |
| Ti | -0.710544 | -4.996586  | 16.898412 |
| O  | 3.577144  | -3.744718  | 16.488691 |
| Ti | 4.784611  | -5.199735  | 17.079879 |
| O  | 4.692710  | -4.794481  | 18.924163 |
| O  | 3.515080  | -3.719100  | 21.629664 |
| Ti | 4.706094  | -4.884788  | 20.794268 |
| O  | 6.091898  | -6.436097  | 21.294466 |
| O  | 6.210643  | -6.830625  | 16.988218 |
| O  | 6.548156  | -4.216426  | 16.654526 |
| O  | 6.405231  | -3.877571  | 21.050465 |
| O  | 11.960530 | -7.426349  | 21.572612 |
| Ti | 10.275632 | -8.176220  | 21.042256 |
| O  | 10.760734 | -8.653198  | 19.271269 |
| O  | 12.166087 | -8.316109  | 16.605941 |
| Ti | 10.524644 | -8.795160  | 17.438571 |
| O  | 9.218772  | -9.723264  | 21.289595 |
| O  | 9.086760  | -6.802302  | 21.371745 |
| Ti | 7.777296  | -5.521486  | 20.787403 |
| O  | 7.952193  | -5.738566  | 18.969052 |
| O  | 9.329584  | -7.412714  | 16.758516 |
| Ti | 7.956159  | -5.937048  | 17.047263 |
| Ti | 1.792308  | -7.714333  | 16.974020 |
| O  | 1.979826  | -6.692028  | 18.599252 |
| Ti | 1.913820  | -7.312782  | 20.347991 |
| Ti | -0.875306 | -10.550120 | 16.468308 |
| O  | 0.869373  | -8.877408  | 19.460485 |
| O  | 0.472972  | -11.104035 | 20.871950 |

|    |           |            |           |
|----|-----------|------------|-----------|
| O  | -1.366921 | -10.651600 | 18.315943 |
| Ti | -0.676982 | -9.934632  | 19.895738 |
| O  | 0.558183  | -9.268954  | 16.388964 |
| Ti | 5.158131  | -11.799174 | 19.404371 |
| O  | 5.275696  | -13.011497 | 17.987612 |
| Ti | 5.580733  | -11.742664 | 16.541646 |
| O  | 5.100881  | -10.359672 | 18.146232 |
| O  | 3.767838  | -12.080671 | 15.742403 |
| O  | 3.724185  | -11.723056 | 20.602100 |
| O  | 3.099766  | -8.998805  | 20.906806 |
| Ti | 2.199098  | -10.619677 | 20.188331 |
| O  | 2.166759  | -11.181570 | 18.382747 |
| O  | 3.100661  | -9.311088  | 16.764735 |
| Ti | 2.112621  | -11.136463 | 16.498253 |
| O  | 0.379634  | -11.977392 | 16.329638 |
| O  | 3.534469  | -6.727259  | 16.523085 |
| O  | 3.499143  | -6.466483  | 21.200509 |
| Ti | 7.709991  | -10.061434 | 20.174955 |
| O  | 8.216163  | -9.671835  | 18.381963 |
| O  | 10.169655 | -10.383984 | 16.522126 |
| Ti | 8.263617  | -10.364169 | 16.510349 |
| O  | 7.515896  | -12.060636 | 16.458973 |
| O  | 6.878224  | -11.747865 | 20.194626 |
| O  | 6.331679  | -9.125504  | 21.058845 |
| Ti | 4.890497  | -7.975943  | 20.691753 |
| O  | 4.818683  | -7.860029  | 18.887443 |
| O  | 6.338188  | -9.671081  | 16.224358 |
| Ti | 4.925079  | -8.465828  | 17.018693 |

anatase-like 3-D (2,1,3)-mer

|    |           |          |           |
|----|-----------|----------|-----------|
| Ti | -4.417316 | 6.479467 | -1.903312 |
| O  | -4.956196 | 6.085346 | -0.105009 |
| O  | -6.790450 | 6.869396 | 1.805741  |
| Ti | -4.910786 | 6.798729 | 1.786981  |
| O  | -4.152403 | 8.488544 | 1.813262  |
| O  | -3.626918 | 8.182468 | -1.916020 |
| O  | -2.998727 | 5.540390 | -2.726034 |
| Ti | -1.633141 | 4.293669 | -2.420002 |
| O  | -1.540609 | 4.100337 | -0.621675 |
| O  | -2.986247 | 6.083544 | 2.024108  |
| Ti | -1.594648 | 4.859743 | 1.214936  |
| O  | -0.176927 | 3.155126 | 1.602243  |
| O  | -0.231670 | 2.840279 | -3.049917 |
| Ti | -1.893854 | 8.194331 | -1.158599 |
| O  | -1.945982 | 9.394998 | 0.255665  |
| Ti | -2.228567 | 8.127918 | 1.720975  |
| O  | -1.801690 | 6.730655 | 0.060144  |
| O  | -0.416090 | 8.454020 | 2.486373  |
| O  | -0.487981 | 8.103229 | -2.410923 |
| O  | 0.207456  | 5.306894 | -2.495345 |
| Ti | 0.979007  | 6.998290 | -1.895400 |
| O  | 1.103608  | 7.681996 | -0.151680 |

|    |           |           |           |
|----|-----------|-----------|-----------|
| O  | 0.232927  | 5.699207  | 1.381419  |
| Ti | 1.249574  | 7.495754  | 1.733188  |
| O  | 2.987936  | 8.370931  | 1.850758  |
| O  | 2.756724  | 5.683674  | 1.850369  |
| O  | 2.347226  | 5.059731  | -0.842886 |
| O  | 2.733387  | 7.176666  | -2.595815 |
| O  | 4.670818  | 6.942287  | -0.101050 |
| Ti | 3.870887  | 6.073543  | -1.536838 |
| Ti | 4.219837  | 6.937167  | 1.766336  |
| Ti | 1.581181  | 4.118082  | 1.041204  |
| O  | 1.272398  | 2.774575  | -0.429423 |
| Ti | 1.342974  | 3.555911  | -2.083706 |
| O  | -5.849771 | 6.152377  | -3.094658 |
| O  | 2.805244  | 2.996135  | -3.095882 |
| Ti | 3.928246  | 1.559398  | -2.537179 |
| O  | 4.079143  | 1.577986  | -0.699315 |
| O  | 3.048317  | 2.998956  | 1.778020  |
| Ti | 4.082014  | 1.404026  | 1.223168  |
| O  | 5.462851  | -0.302551 | 1.670313  |
| O  | 5.200968  | -0.069483 | -3.111171 |
| O  | 5.874572  | 5.769320  | 2.205421  |
| O  | 5.177002  | 5.190791  | -2.538416 |
| O  | 5.766113  | 2.405017  | -2.919310 |
| Ti | 6.634077  | 3.998506  | -2.157951 |
| O  | 6.587910  | 4.198591  | -0.309749 |
| O  | 5.877150  | 2.388057  | 1.409448  |
| Ti | 6.886511  | 4.201133  | 1.567042  |
| O  | 8.692039  | 4.927865  | 1.698197  |
| O  | 8.428030  | 2.251776  | 1.726802  |
| O  | 8.026700  | 2.162111  | -1.671594 |
| O  | 8.429667  | 4.556831  | -2.680643 |
| O  | 10.364136 | 3.883459  | -0.221273 |
| Ti | 9.527301  | 3.303688  | -1.782549 |
| O  | 10.861554 | 2.153595  | -2.509908 |
| Ti | 9.905563  | 3.495776  | 1.591505  |
| O  | 11.536985 | 2.225828  | 2.035633  |
| Ti | 11.560192 | 0.371618  | 1.246412  |
| Ti | 11.067736 | 0.565632  | -1.524588 |
| O  | 11.208441 | -1.483878 | 1.531753  |
| Ti | 9.473964  | -2.247572 | 1.276601  |
| O  | 9.090691  | -2.182116 | -0.596230 |
| O  | 10.738554 | -0.964129 | -2.523931 |
| Ti | 9.038534  | -1.897909 | -2.424735 |
| O  | 9.995870  | 0.726677  | 0.061812  |
| O  | 8.331979  | -0.765021 | 1.839213  |
| Ti | 7.164937  | 0.737814  | 1.208516  |
| O  | 12.585320 | 0.421270  | -0.353493 |
| O  | 6.805565  | 0.062113  | -0.540322 |
| O  | 8.049292  | -0.493639 | -3.194647 |
| Ti | 6.861770  | 0.638620  | -2.296822 |
| Ti | -6.989359 | 4.656509  | -2.787868 |
| O  | -7.500314 | 5.361363  | -1.103554 |

|    |            |           |           |
|----|------------|-----------|-----------|
| O  | -8.782751  | 4.950580  | 1.582487  |
| Ti | -7.161720  | 5.370439  | 0.718197  |
| O  | -5.808833  | 3.257753  | -3.086883 |
| Ti | -4.513696  | 1.902759  | -2.643588 |
| O  | -4.655984  | 2.102933  | -0.818669 |
| O  | -6.007722  | 3.874492  | 1.360221  |
| Ti | -4.662887  | 2.355580  | 1.093272  |
| O  | -3.217908  | 0.630217  | 1.453630  |
| O  | -3.130183  | 0.265532  | -3.017258 |
| O  | -2.817804  | 2.822057  | -3.131217 |
| O  | -2.923088  | 3.231240  | 1.244644  |
| Ti | -1.445330  | 1.640051  | 1.009704  |
| O  | -1.447177  | 1.117501  | -0.822559 |
| Ti | -1.434813  | 1.222480  | -2.681035 |
| Ti | -11.077351 | 0.084278  | -0.966609 |
| Ti | -10.767941 | 0.638385  | 1.863012  |
| O  | -10.874934 | 1.634411  | -2.000827 |
| Ti | -9.127208  | 2.371667  | -2.058059 |
| O  | -8.609514  | 2.720449  | -0.290878 |
| O  | -10.821942 | 2.573411  | 1.856036  |
| Ti | -9.034454  | 3.099390  | 1.587469  |
| O  | -9.564409  | -0.143925 | 0.150311  |
| O  | -8.677097  | 3.867558  | -3.138664 |
| O  | -8.288105  | 0.964602  | -2.968341 |
| Ti | -7.199520  | -0.461565 | -2.434230 |
| O  | -12.158975 | 0.449105  | 0.493313  |
| O  | -6.839929  | -0.382089 | -0.640255 |
| O  | -8.640454  | 1.099571  | 1.995423  |
| Ti | -7.525314  | -0.347718 | 1.161636  |
| Ti | -10.099390 | -2.880053 | -1.540089 |
| O  | -11.376780 | -1.536392 | -1.923213 |
| O  | -8.687760  | -1.987273 | 1.569222  |
| O  | -9.250388  | -4.497652 | 2.269048  |
| O  | -10.808413 | -3.330573 | 0.183647  |
| Ti | -10.344141 | -2.838801 | 1.941733  |
| O  | -11.257703 | -1.202812 | 2.625728  |
| O  | -8.588979  | -1.861999 | -2.196648 |
| O  | -6.128581  | -5.154312 | -2.778850 |
| O  | -6.238861  | -5.231538 | 1.890411  |
| O  | -6.136079  | -2.113098 | 1.603429  |
| Ti | -7.424234  | -3.722956 | 1.525654  |
| O  | -7.303100  | -3.843107 | -0.342545 |
| O  | -6.115855  | -2.294370 | -2.904286 |
| Ti | -7.306758  | -3.740467 | -2.226892 |
| O  | -9.210187  | -4.303220 | -2.400881 |
| O  | -5.585580  | 0.297517  | -3.294500 |
| O  | -5.793204  | 0.711674  | 1.347420  |
| O  | -3.209228  | -2.411092 | 1.620324  |
| Ti | -4.467533  | -0.965637 | 1.047145  |
| O  | -4.222720  | -1.312844 | -0.805729 |
| O  | -3.149067  | -2.532777 | -3.493291 |
| Ti | -4.321104  | -1.315515 | -2.676110 |

|    |           |           |           |
|----|-----------|-----------|-----------|
| O  | -0.182755 | 0.117684  | -3.517352 |
| Ti | 1.041251  | -1.021705 | -2.658463 |
| O  | 0.944657  | -1.033158 | -0.824850 |
| O  | -0.240627 | 0.150746  | 1.570239  |
| Ti | 1.139954  | -1.200126 | 1.088411  |
| O  | 2.585418  | -2.923575 | 1.469823  |
| O  | 2.441039  | -2.577386 | -3.088068 |
| O  | 2.718513  | 0.023843  | -2.901348 |
| O  | 2.882113  | -0.222374 | 1.192865  |
| O  | 8.775862  | -4.024210 | 1.468587  |
| Ti | 6.997248  | -4.619718 | 1.238707  |
| O  | 6.752906  | -4.335128 | -0.665030 |
| O  | 8.289585  | -3.495494 | -3.081037 |
| Ti | 6.584933  | -4.184561 | -2.508713 |
| O  | 6.272014  | -6.385057 | 1.393780  |
| O  | 5.650799  | -3.308712 | 1.757945  |
| Ti | 4.282062  | -1.923555 | 1.196444  |
| O  | 4.241167  | -1.887842 | -0.707520 |
| O  | 5.395473  | -2.902977 | -3.154182 |
| Ti | 4.105328  | -1.658939 | -2.548099 |
| Ti | -1.798416 | -3.401775 | -2.511001 |
| O  | -1.737519 | -3.109041 | -0.694520 |
| Ti | -1.775648 | -3.666862 | 1.134629  |
| Ti | -4.627250 | -6.052732 | -2.098316 |
| O  | -3.109386 | -5.265448 | 1.312182  |
| O  | -3.512942 | -7.959546 | 1.850834  |
| O  | -5.117501 | -6.680798 | -0.390234 |
| Ti | -4.653922 | -6.334309 | 1.420865  |
| O  | -3.116736 | -4.901914 | -2.024172 |
| Ti | 1.581798  | -8.400747 | 1.453995  |
| O  | 1.361930  | -9.367013 | -0.181957 |
| Ti | 1.322789  | -7.894645 | -1.369428 |
| O  | 1.321640  | -6.708064 | 0.220946  |
| O  | -0.154912 | -7.709273 | -2.483444 |
| O  | -0.489279 | -8.507784 | 1.760065  |
| O  | -0.519169 | -5.473798 | 1.518345  |
| Ti | -1.748553 | -7.095750 | 1.276063  |
| O  | -1.922043 | -7.067432 | -0.558563 |
| O  | -0.627484 | -5.112897 | -3.035639 |
| Ti | -1.758463 | -6.624696 | -2.409004 |
| O  | -3.467915 | -7.249608 | -3.063197 |
| O  | -0.122957 | -2.614821 | -3.209345 |
| O  | 0.054523  | -2.916065 | 1.214334  |
| Ti | 4.422420  | -6.718245 | 1.196090  |
| O  | 4.232462  | -6.117413 | -0.618635 |
| O  | 5.665348  | -5.765509 | -3.098497 |
| Ti | 3.948230  | -6.225964 | -2.455562 |
| O  | 2.907026  | -7.837264 | -2.365463 |
| O  | 3.481747  | -8.381249 | 1.468653  |
| O  | 3.047042  | -5.452580 | 1.753171  |
| Ti | 1.356256  | -4.612657 | 1.007762  |
| O  | 1.290874  | -4.328213 | -0.914483 |

|    |           |           |           |
|----|-----------|-----------|-----------|
| O  | 2.607462  | -5.269581 | -3.374306 |
| Ti | 1.214335  | -4.166959 | -2.733123 |
| Ti | -2.952387 | 5.738245  | 4.281574  |
| O  | -3.643400 | 5.150874  | 6.000766  |
| O  | -5.395712 | 5.603996  | 8.158213  |
| Ti | -3.497508 | 5.634408  | 7.860052  |
| O  | -2.752682 | 7.406808  | 7.796234  |
| O  | -2.438630 | 7.692435  | 3.868733  |
| O  | -1.694015 | 4.523852  | 3.427862  |
| Ti | -0.265413 | 3.212764  | 3.838448  |
| O  | -0.278382 | 3.236064  | 5.693639  |
| O  | -1.507017 | 5.052184  | 7.960284  |
| Ti | -0.399161 | 3.501762  | 7.569600  |
| O  | 1.032576  | 1.804909  | 7.991590  |
| O  | 1.107328  | 1.566792  | 3.707499  |
| Ti | -0.554922 | 7.752081  | 4.512912  |
| O  | -0.393816 | 8.577803  | 6.165912  |
| Ti | -0.946417 | 7.069751  | 7.325894  |
| O  | -1.114154 | 6.132531  | 5.508936  |
| O  | 0.621526  | 7.117228  | 8.543560  |
| O  | 1.175398  | 7.112103  | 3.854998  |
| O  | 1.459434  | 4.252549  | 3.540250  |
| Ti | 2.609123  | 5.782843  | 4.223505  |
| O  | 2.304606  | 6.110025  | 6.041313  |
| O  | 1.339669  | 4.457986  | 7.832886  |
| Ti | 2.412216  | 6.229505  | 7.927274  |
| O  | 4.165632  | 7.073309  | 7.976834  |
| O  | 3.973115  | 4.418654  | 8.079323  |
| O  | 4.047532  | 4.186025  | 4.325680  |
| O  | 4.330507  | 6.832756  | 3.870129  |
| O  | 6.053626  | 5.750785  | 6.049472  |
| Ti | 5.598646  | 5.281106  | 4.285307  |
| Ti | 5.456121  | 5.667057  | 7.875596  |
| Ti | 2.719645  | 2.874976  | 7.601441  |
| O  | 2.847242  | 2.528939  | 5.815205  |
| Ti | 2.794821  | 2.549620  | 3.885341  |
| O  | -4.859221 | 5.479328  | 3.447655  |
| O  | 4.026734  | 1.132405  | 3.393490  |
| Ti | 5.350066  | -0.210498 | 3.948518  |
| O  | 5.242968  | 0.050873  | 5.780142  |
| O  | 4.112061  | 1.583104  | 8.196145  |
| Ti | 5.305561  | 0.106569  | 7.679073  |
| O  | 6.717511  | -1.598060 | 8.106529  |
| O  | 6.732417  | -1.849309 | 3.959912  |
| O  | 7.082321  | 4.459405  | 8.326072  |
| O  | 6.881967  | 3.865307  | 3.719873  |
| O  | 7.078555  | 0.846449  | 3.568784  |
| Ti | 8.208197  | 2.452351  | 4.069366  |
| O  | 8.077421  | 2.620383  | 5.890232  |
| O  | 7.028122  | 1.188031  | 7.837828  |
| Ti | 8.184439  | 2.922529  | 7.778271  |
| O  | 10.060100 | 3.581300  | 7.682633  |

|    |            |           |          |
|----|------------|-----------|----------|
| O  | 9.687939   | 0.973523  | 8.066391 |
| O  | 9.670527   | 0.744095  | 4.070117 |
| O  | 10.029639  | 3.396092  | 3.705785 |
| O  | 11.837871  | 2.194878  | 5.802436 |
| Ti | 11.225786  | 1.828911  | 4.081300 |
| O  | 12.321457  | 0.183462  | 3.370477 |
| Ti | 11.220641  | 2.120321  | 7.656944 |
| O  | 12.811867  | 0.837321  | 8.187796 |
| Ti | 12.855549  | -1.022493 | 7.451400 |
| Ti | 12.471682  | -1.209362 | 4.675311 |
| O  | 12.414520  | -2.877785 | 7.799102 |
| Ti | 10.640510  | -3.514234 | 7.890678 |
| O  | 10.114031  | -3.924627 | 6.116323 |
| O  | 12.239678  | -3.015632 | 4.193242 |
| Ti | 10.542729  | -3.885487 | 4.312164 |
| O  | 11.367932  | -0.793999 | 6.169054 |
| O  | 9.513930   | -2.006818 | 8.289958 |
| Ti | 8.334239   | -0.471367 | 7.669967 |
| O  | 13.957915  | -1.095565 | 5.892349 |
| O  | 8.410578   | -0.805034 | 5.866967 |
| O  | 9.558020   | -2.474336 | 3.507939 |
| Ti | 8.438307   | -0.887784 | 3.971874 |
| Ti | -5.963283  | 3.784030  | 3.546562 |
| O  | -6.366766  | 4.327972  | 5.319341 |
| O  | -7.648560  | 3.635407  | 7.974767 |
| Ti | -6.055443  | 4.182155  | 7.130148 |
| O  | -4.695918  | 2.353261  | 3.323429 |
| Ti | -3.341406  | 0.815511  | 3.697102 |
| O  | -3.631958  | 1.114347  | 5.520192 |
| O  | -4.827157  | 2.670222  | 7.631090 |
| Ti | -3.470327  | 1.131521  | 7.388206 |
| O  | -2.048399  | -0.601005 | 7.883761 |
| O  | -1.957675  | -0.874027 | 3.766263 |
| O  | -1.583715  | 1.708837  | 3.361464 |
| O  | -1.699005  | 1.944138  | 7.550138 |
| Ti | -0.252525  | 0.283903  | 7.469801 |
| O  | -0.166962  | 0.013017  | 5.661124 |
| Ti | -0.170051  | -0.017552 | 3.727773 |
| Ti | -10.532509 | -1.172350 | 4.687331 |
| Ti | -9.722078  | -0.671876 | 7.412506 |
| O  | -10.255995 | 0.689572  | 3.959982 |
| Ti | -8.259933  | 1.065747  | 4.182725 |
| O  | -7.590265  | 1.621013  | 5.876985 |
| O  | -9.790307  | 1.179536  | 7.828683 |
| Ti | -7.965832  | 1.779041  | 7.736430 |
| O  | -8.846258  | -0.890867 | 5.593868 |
| O  | -7.761395  | 2.908983  | 3.340801 |
| O  | -7.261472  | -0.403870 | 3.423325 |
| Ti | -6.068559  | -1.910761 | 3.899445 |
| O  | -11.351881 | -1.046696 | 6.343050 |
| O  | -5.935709  | -1.728867 | 5.726963 |
| O  | -7.611315  | -0.277896 | 8.043706 |



|    |            |           |          |
|----|------------|-----------|----------|
| Ti | -6.221919  | -1.589630 | 7.586470 |
| Ti | -8.993903  | -4.504871 | 4.374504 |
| O  | -10.456648 | -3.063069 | 4.072907 |
| O  | -7.458314  | -3.205370 | 7.579253 |
| O  | -8.044944  | -5.701003 | 8.358781 |
| O  | -9.700047  | -4.480273 | 6.217775 |
| Ti | -9.133694  | -4.055468 | 7.926807 |
| O  | -9.835090  | -2.249786 | 8.586058 |
| O  | -7.432725  | -3.404299 | 3.834580 |
| O  | -4.901257  | -6.781641 | 3.543247 |
| O  | -4.970812  | -6.492522 | 8.143370 |
| O  | -4.899049  | -3.357962 | 8.015506 |
| Ti | -6.189149  | -4.967154 | 7.756848 |
| O  | -5.825018  | -5.170364 | 5.960481 |
| O  | -4.789597  | -3.648320 | 3.768198 |
| Ti | -6.013501  | -5.249412 | 4.087353 |
| O  | -7.894250  | -5.972948 | 4.350542 |
| O  | -4.462694  | -0.850253 | 3.354768 |
| O  | -4.557755  | -0.540941 | 7.644374 |
| O  | -1.864331  | -3.620695 | 8.001682 |
| Ti | -3.203817  | -2.254290 | 7.486912 |
| O  | -3.010280  | -2.569542 | 5.691086 |
| O  | -1.650128  | -3.854954 | 3.340065 |
| Ti | -3.054993  | -2.561419 | 3.775745 |
| O  | 1.161178   | -1.386173 | 3.288821 |
| Ti | 2.446439   | -2.763392 | 3.846646 |
| O  | 2.290209   | -2.523496 | 5.681541 |
| O  | 1.045663   | -1.100072 | 8.042620 |
| Ti | 2.410269   | -2.457636 | 7.588449 |
| O  | 3.826274   | -4.191184 | 7.992049 |
| O  | 3.913347   | -4.349502 | 4.026144 |
| O  | 4.191594   | -1.820601 | 3.478419 |
| O  | 4.190071   | -1.603565 | 7.645728 |
| O  | 10.074164  | -5.290098 | 8.631201 |
| Ti | 8.275481   | -6.164904 | 8.122688 |
| O  | 8.453085   | -6.378114 | 6.247294 |
| O  | 10.002240  | -5.615086 | 3.796655 |
| Ti | 8.274552   | -6.218895 | 4.352551 |
| O  | 7.202398   | -7.888569 | 8.568117 |
| O  | 6.969521   | -4.785495 | 8.281953 |
| Ti | 5.609988   | -3.282240 | 7.680084 |
| O  | 5.899813   | -3.623004 | 5.887862 |
| O  | 7.084371   | -4.928651 | 3.588629 |
| Ti | 5.678404   | -3.542325 | 3.969467 |
| Ti | -0.416972  | -5.316099 | 3.795422 |
| O  | -0.523272  | -5.259351 | 5.632940 |
| Ti | -0.580961  | -5.007453 | 7.535690 |
| Ti | -3.334861  | -8.028577 | 3.984173 |
| O  | -1.886611  | -6.643123 | 7.507889 |
| O  | -2.223533  | -9.247648 | 8.088639 |
| O  | -3.866368  | -8.134483 | 5.826611 |
| Ti | -3.463630  | -7.687562 | 7.615650 |

|    |           |            |           |
|----|-----------|------------|-----------|
| O  | -1.746309 | -6.858282  | 3.663918  |
| Ti | 2.769772  | -10.104403 | 7.493228  |
| O  | 2.631181  | -11.216642 | 5.937333  |
| Ti | 2.893847  | -9.778897  | 4.693108  |
| O  | 2.786774  | -8.599839  | 6.164167  |
| O  | 1.513276  | -9.513590  | 3.387341  |
| O  | 0.881883  | -9.747099  | 8.065166  |
| O  | 0.785294  | -6.767904  | 8.005064  |
| Ti | -0.462649 | -8.327051  | 7.585900  |
| O  | -0.228458 | -8.549271  | 5.733755  |
| O  | 1.042701  | -7.038838  | 3.361611  |
| Ti | -0.366451 | -8.646285  | 3.859230  |
| O  | -2.115449 | -9.491033  | 3.917358  |
| O  | 1.285637  | -4.386947  | 3.370357  |
| O  | 1.161278  | -4.094267  | 7.638200  |
| Ti | 5.390442  | -8.179210  | 7.802243  |
| O  | 5.821135  | -7.664314  | 6.032097  |
| O  | 7.520535  | -7.868962  | 3.762363  |
| Ti | 5.715918  | -8.169888  | 4.240401  |
| O  | 4.702785  | -9.779104  | 4.133921  |
| O  | 4.679154  | -9.927835  | 7.766105  |
| O  | 3.993693  | -6.915954  | 8.210264  |
| Ti | 2.515626  | -5.725602  | 7.549210  |
| O  | 2.504790  | -5.958931  | 5.701337  |
| O  | 4.415541  | -7.031989  | 3.457872  |
| Ti | 2.740170  | -5.989838  | 3.830343  |
| Ti | -1.834123 | 4.416935   | 10.559957 |
| O  | -2.571950 | 3.783990   | 12.226665 |
| O  | -4.417311 | 4.445329   | 14.262192 |
| Ti | -2.518059 | 4.421888   | 14.028779 |
| O  | -1.638716 | 6.100254   | 13.931573 |
| O  | -1.404580 | 6.263067   | 10.250106 |
| O  | -0.626649 | 3.157165   | 9.729720  |
| Ti | 0.890695  | 1.951700   | 10.247577 |
| O  | 0.864439  | 1.983295   | 12.097567 |
| O  | -0.565476 | 3.766831   | 14.325255 |
| Ti | 0.729452  | 2.314818   | 13.946196 |
| O  | 2.119643  | 0.665677   | 14.450990 |
| O  | 2.270596  | 0.314447   | 10.179565 |
| Ti | 0.492971  | 6.423624   | 10.607612 |
| O  | 0.658164  | 7.283388   | 12.273884 |
| Ti | 0.205030  | 5.786672   | 13.445110 |
| O  | 0.156668  | 4.753497   | 11.744844 |
| O  | 1.724816  | 5.814413   | 14.708041 |
| O  | 2.332941  | 5.909768   | 10.029710 |
| O  | 2.610030  | 3.019561   | 9.949342  |
| Ti | 3.802730  | 4.606427   | 10.444056 |
| O  | 3.536988  | 4.972768   | 12.255118 |
| O  | 2.434706  | 3.323238   | 14.155296 |
| Ti | 3.610764  | 5.038297   | 14.146044 |
| O  | 5.378036  | 5.888690   | 14.149160 |
| O  | 5.093752  | 3.256735   | 14.379904 |

|    |           |           |           |
|----|-----------|-----------|-----------|
| O  | 5.233055  | 2.958731  | 10.519976 |
| O  | 5.555576  | 5.590019  | 9.997208  |
| O  | 7.190108  | 4.497080  | 12.254501 |
| Ti | 6.790736  | 4.036740  | 10.471475 |
| Ti | 6.629292  | 4.458275  | 14.102122 |
| Ti | 3.810515  | 1.701067  | 14.027958 |
| O  | 4.016311  | 1.422534  | 12.230465 |
| Ti | 3.980262  | 1.273237  | 10.320974 |
| O  | -3.525424 | 4.181975  | 9.485862  |
| O  | 5.224314  | -0.150720 | 9.847010  |
| Ti | 6.581929  | -1.466329 | 10.421970 |
| O  | 6.289650  | -1.153238 | 12.219079 |
| O  | 5.172411  | 0.405565  | 14.636033 |
| Ti | 6.423320  | -1.014670 | 14.123957 |
| O  | 7.801283  | -2.732093 | 14.574701 |
| O  | 7.978775  | -3.134188 | 10.303450 |
| O  | 8.250721  | 3.272511  | 14.575243 |
| O  | 8.244412  | 2.789607  | 9.928347  |
| O  | 8.240737  | -0.291810 | 9.985543  |
| Ti | 9.505777  | 1.315026  | 10.335097 |
| O  | 9.247115  | 1.554989  | 12.141413 |
| O  | 8.145349  | 0.069032  | 14.219011 |
| Ti | 9.359658  | 1.725804  | 14.033649 |
| O  | 11.270650 | 2.334961  | 13.866816 |
| O  | 10.813590 | -0.226647 | 14.296735 |
| O  | 10.844823 | -0.385157 | 10.495888 |
| O  | 11.360358 | 2.132588  | 9.802865  |
| O  | 13.088326 | 0.936141  | 11.996080 |
| Ti | 12.500926 | 0.547817  | 10.276788 |
| O  | 13.340931 | -1.210808 | 9.601350  |
| Ti | 12.399957 | 0.861950  | 13.833728 |
| O  | 13.884084 | -0.549607 | 14.307987 |
| Ti | 13.783307 | -2.425342 | 13.566318 |
| Ti | 13.162015 | -2.753722 | 10.817170 |
| O  | 13.378035 | -4.294800 | 13.952099 |
| Ti | 11.570504 | -4.810506 | 13.990068 |
| O  | 10.873730 | -5.202848 | 12.263680 |
| O  | 13.160968 | -4.649717 | 10.414468 |
| Ti | 11.392485 | -5.325982 | 10.433411 |
| O  | 12.203026 | -2.211195 | 12.448754 |
| O  | 10.551201 | -3.262282 | 14.559743 |
| Ti | 9.445661  | -1.659993 | 14.069483 |
| O  | 14.741273 | -2.577289 | 11.951070 |
| O  | 9.139402  | -1.860914 | 12.270660 |
| O  | 11.013706 | -3.304869 | 10.078235 |
| Ti | 9.592205  | -1.985791 | 10.450405 |
| Ti | -4.748215 | 2.568905  | 9.762492  |
| O  | -5.245929 | 3.075798  | 11.506915 |
| O  | -6.632206 | 2.357764  | 14.145339 |
| Ti | -5.014969 | 2.906771  | 13.354723 |
| O  | -3.535380 | 1.101892  | 9.643098  |
| Ti | -2.189193 | -0.440837 | 10.127316 |

|    |            |           |           |
|----|------------|-----------|-----------|
| O  | -2.480461  | -0.059324 | 11.928493 |
| O  | -3.795698  | 1.469058  | 14.013287 |
| Ti | -2.396755  | -0.028658 | 13.812484 |
| O  | -0.957254  | -1.726405 | 14.384399 |
| O  | -0.784785  | -2.136755 | 10.167852 |
| O  | -0.410971  | 0.428727  | 9.802197  |
| O  | -0.619138  | 0.800255  | 13.983441 |
| Ti | 0.824686   | -0.853269 | 13.964989 |
| O  | 0.958728   | -1.193210 | 12.155882 |
| Ti | 0.999378   | -1.294772 | 10.229240 |
| Ti | -9.273765  | -2.419219 | 10.762291 |
| Ti | -8.653039  | -2.090284 | 13.511654 |
| O  | -8.868169  | -0.550004 | 10.375047 |
| Ti | -7.060781  | -0.033924 | 10.336831 |
| O  | -6.363989  | 0.357962  | 12.063271 |
| O  | -8.650968  | -0.194204 | 13.913777 |
| Ti | -6.881927  | 0.482272  | 13.893667 |
| O  | -7.693900  | -2.634236 | 11.880416 |
| O  | -6.580324  | 1.651170  | 9.407737  |
| O  | -6.042742  | -1.583270 | 9.768280  |
| Ti | -4.938090  | -3.185959 | 10.259089 |
| O  | -10.231839 | -2.265368 | 12.377270 |
| O  | -4.630146  | -2.984871 | 12.057828 |
| O  | -6.504283  | -1.539396 | 14.249436 |
| Ti | -5.084575  | -2.860157 | 13.877698 |
| Ti | -7.892570  | -5.707480 | 10.495247 |
| O  | -9.376239  | -4.295326 | 10.021257 |
| O  | -6.337569  | -4.460521 | 13.832258 |
| O  | -6.853182  | -6.977828 | 14.525588 |
| O  | -8.581360  | -5.781762 | 12.332669 |
| Ti | -7.993427  | -5.392836 | 14.051764 |
| O  | -8.832860  | -3.633678 | 14.726949 |
| O  | -6.306260  | -4.618817 | 10.032478 |
| O  | -3.743122  | -8.118363 | 9.753314  |
| O  | -3.736213  | -7.635747 | 14.400036 |
| O  | -3.733261  | -4.554374 | 14.342763 |
| Ti | -4.998304  | -6.161154 | 13.993445 |
| O  | -4.740099  | -6.401235 | 12.187100 |
| O  | -3.637923  | -4.915204 | 10.109795 |
| Ti | -4.852144  | -6.571851 | 10.294905 |
| O  | -6.763248  | -7.180570 | 10.461713 |
| O  | -3.293548  | -2.113919 | 9.753618  |
| O  | -3.470797  | -1.711797 | 14.025125 |
| O  | -0.716519  | -4.694973 | 14.481686 |
| Ti | -2.070324  | -3.379841 | 13.906318 |
| O  | -1.781664  | -3.693182 | 12.109445 |
| O  | -0.664462  | -5.251314 | 9.692400  |
| Ti | -1.915825  | -3.831334 | 10.204578 |
| O  | 2.361376   | -2.645439 | 9.780900  |
| Ti | 3.682710   | -3.990201 | 10.363499 |
| O  | 3.548833   | -3.654519 | 12.172513 |
| O  | 2.146315   | -2.200778 | 14.547656 |

|    |           |            |           |
|----|-----------|------------|-----------|
| Ti | 3.508041  | -3.551518  | 14.099147 |
| O  | 4.918120  | -5.274612  | 14.526209 |
| O  | 5.126934  | -5.646133  | 10.344974 |
| O  | 5.464568  | -3.120628  | 9.943951  |
| O  | 5.292095  | -2.708983  | 14.161120 |
| O  | 11.088982 | -6.493875  | 14.920900 |
| Ti | 9.258084  | -7.412353  | 14.564280 |
| O  | 9.755614  | -7.919283  | 12.819781 |
| O  | 11.143339 | -7.201973  | 10.181003 |
| Ti | 9.526257  | -7.750414  | 10.971922 |
| O  | 8.036240  | -9.026414  | 14.842579 |
| O  | 8.042840  | -5.947080  | 14.684324 |
| Ti | 6.696160  | -4.404890  | 14.201049 |
| O  | 6.986883  | -4.785950  | 12.399660 |
| O  | 8.305350  | -6.313602  | 10.315240 |
| Ti | 6.904585  | -4.817337  | 10.515789 |
| Ti | 0.696945  | -6.546816  | 10.300482 |
| O  | 0.490769  | -6.268576  | 12.097935 |
| Ti | 0.527071  | -6.118695  | 14.007434 |
| Ti | -2.121550 | -9.304295  | 10.226308 |
| O  | -0.725337 | -7.804722  | 13.808408 |
| O  | -1.047879 | -10.436073 | 14.331258 |
| O  | -2.682262 | -9.343284  | 12.073890 |
| Ti | -2.285891 | -8.882698  | 13.856897 |
| O  | -0.585962 | -8.102703  | 9.948581  |
| Ti | 4.014811  | -11.269213 | 13.719934 |
| O  | 3.850137  | -12.128959 | 12.053794 |
| Ti | 4.303942  | -10.631879 | 10.883115 |
| O  | 4.350477  | -9.599161  | 12.583742 |
| O  | 2.783967  | -10.659140 | 9.620456  |
| O  | 2.174527  | -10.756267 | 14.298524 |
| O  | 1.896864  | -7.865742  | 14.378989 |
| Ti | 0.705062  | -9.452707  | 13.884394 |
| O  | 0.970457  | -9.818413  | 12.073234 |
| O  | 2.072851  | -8.169203  | 10.173065 |
| Ti | 0.897134  | -9.884313  | 10.182186 |
| O  | -0.869986 | -10.734582 | 10.179014 |
| O  | 2.387871  | -5.511764  | 9.877353  |
| O  | 2.236890  | -5.160431  | 14.149108 |
| Ti | 6.342998  | -9.263355  | 13.771444 |
| O  | 7.079143  | -8.630647  | 12.103868 |
| O  | 8.926442  | -9.289037  | 10.066606 |
| Ti | 7.026684  | -9.266388  | 10.301659 |
| O  | 6.147683  | -10.944750 | 10.396818 |
| O  | 5.912395  | -11.109837 | 14.077355 |
| O  | 5.133806  | -8.002876  | 14.598378 |
| Ti | 3.616593  | -6.797892  | 14.080704 |
| O  | 3.642113  | -6.828137  | 12.230664 |
| O  | 5.074555  | -8.611388  | 10.004045 |
| Ti | 3.778066  | -7.161040  | 10.382313 |
| Ti | -0.880845 | 3.334803   | 16.527146 |
| O  | -1.312818 | 2.820488   | 18.297049 |

|    |           |           |           |
|----|-----------|-----------|-----------|
| O  | -3.012026 | 3.024894  | 20.566874 |
| Ti | -1.207391 | 3.326167  | 20.088804 |
| O  | -0.194263 | 4.935373  | 20.195095 |
| O  | -0.170156 | 5.083811  | 16.562438 |
| O  | 0.514341  | 2.070209  | 16.118433 |
| Ti | 1.992089  | 0.878946  | 16.778953 |
| O  | 2.003363  | 1.113636  | 18.626837 |
| O  | 0.092984  | 2.187768  | 20.870506 |
| Ti | 1.767370  | 1.144569  | 20.497716 |
| O  | 3.221851  | -0.458722 | 20.958074 |
| O  | 3.346647  | -0.751984 | 16.689820 |
| Ti | 1.739195  | 5.260417  | 16.835480 |
| O  | 1.878129  | 6.372273  | 18.391725 |
| Ti | 1.614614  | 4.934286  | 19.635478 |
| O  | 1.720792  | 3.755525  | 18.164175 |
| O  | 2.995012  | 4.668316  | 20.941279 |
| O  | 3.626446  | 4.901631  | 16.263330 |
| O  | 3.722306  | 1.921667  | 16.323445 |
| Ti | 4.970309  | 3.480826  | 16.742430 |
| O  | 4.735819  | 3.703195  | 18.594543 |
| O  | 3.464882  | 2.192973  | 20.966880 |
| Ti | 4.874154  | 3.800412  | 20.469035 |
| O  | 6.623151  | 4.645312  | 20.410776 |
| O  | 6.253635  | 2.012493  | 20.664436 |
| O  | 6.394234  | 1.797058  | 16.820685 |
| O  | 6.731294  | 4.401604  | 16.239831 |
| O  | 8.374071  | 3.288414  | 18.501924 |
| Ti | 7.971427  | 2.841587  | 16.712933 |
| Ti | 7.842276  | 3.182881  | 20.344339 |
| Ti | 4.924688  | 0.470119  | 20.532971 |
| O  | 5.030955  | 0.412705  | 18.695485 |
| Ti | 5.088829  | 0.161339  | 16.792685 |
| O  | -2.689700 | 3.044499  | 15.761344 |
| O  | 6.372552  | -1.225278 | 16.327198 |
| Ti | 7.711493  | -2.592185 | 16.841211 |
| O  | 7.519181  | -2.277613 | 18.637174 |
| O  | 6.158717  | -0.990571 | 20.987953 |
| Ti | 7.562611  | -2.284632 | 20.552397 |
| O  | 8.969857  | -3.995615 | 20.972799 |
| O  | 9.065712  | -4.305005 | 16.684533 |
| O  | 9.408213  | 1.935415  | 20.785295 |
| O  | 9.478779  | 1.647005  | 16.185321 |
| O  | 9.407373  | -1.488566 | 16.312942 |
| Ti | 10.696691 | 0.121337  | 16.572073 |
| O  | 10.330234 | 0.323339  | 18.368160 |
| O  | 9.297674  | -1.198643 | 20.560186 |
| Ti | 10.520326 | 0.403370  | 20.241053 |
| O  | 12.400512 | 1.126762  | 19.977818 |
| O  | 11.939730 | -1.441111 | 20.494937 |
| O  | 11.966707 | -1.639881 | 16.750302 |
| O  | 12.552378 | 0.855515  | 15.970498 |
| O  | 14.207788 | -0.365183 | 18.111375 |

|    |           |           |           |
|----|-----------|-----------|-----------|
| Ti | 13.641439 | -0.789732 | 16.402355 |
| O  | 14.344089 | -2.594870 | 15.742925 |
| Ti | 13.501349 | -0.340825 | 19.954611 |
| O  | 14.963231 | -1.782744 | 20.256804 |
| Ti | 15.042788 | -3.673828 | 19.642870 |
| Ti | 14.231828 | -4.171812 | 16.917952 |
| O  | 14.768531 | -5.535427 | 20.370122 |
| Ti | 12.772058 | -5.909627 | 20.147862 |
| O  | 12.103974 | -6.467075 | 18.452934 |
| O  | 14.301639 | -6.022875 | 16.502227 |
| Ti | 12.476461 | -6.621688 | 16.593215 |
| O  | 13.356079 | -3.954511 | 18.736596 |
| O  | 11.769682 | -4.441784 | 20.903872 |
| Ti | 10.576579 | -2.935790 | 20.428390 |
| O  | 15.861549 | -3.797517 | 17.986538 |
| O  | 10.445179 | -3.120693 | 18.601081 |
| O  | 12.121570 | -4.566632 | 16.283460 |
| Ti | 10.730319 | -3.256488 | 16.741140 |
| Ti | -3.766253 | 1.320468  | 16.205677 |
| O  | -3.944253 | 1.534226  | 18.081174 |
| O  | -5.493497 | 0.770644  | 20.531427 |
| Ti | -3.765992 | 1.375002  | 19.975777 |
| O  | -2.461458 | -0.060063 | 16.046547 |
| Ti | -1.102474 | -1.564129 | 16.648079 |
| O  | -1.392512 | -1.222660 | 18.440443 |
| O  | -2.576014 | 0.084176  | 20.739537 |
| Ti | -1.171351 | -1.303348 | 20.358807 |
| O  | 0.315992  | -3.024140 | 20.849879 |
| O  | 0.317667  | -3.242705 | 16.683186 |
| O  | 0.681374  | -0.654916 | 16.336305 |
| O  | 0.593751  | -0.495749 | 20.302606 |
| Ti | 2.060322  | -2.083469 | 20.481843 |
| O  | 2.216997  | -2.318834 | 18.646919 |
| Ti | 2.097318  | -2.388806 | 16.739869 |
| Ti | -8.346996 | -3.822156 | 16.876854 |
| Ti | -7.963292 | -3.635480 | 19.652985 |
| O  | -7.905225 | -1.967051 | 16.528852 |
| Ti | -6.131234 | -1.330171 | 16.437038 |
| O  | -5.604562 | -0.919974 | 18.211558 |
| O  | -7.730607 | -1.829220 | 20.134588 |
| Ti | -6.033811 | -0.958906 | 20.015571 |
| O  | -6.859743 | -4.051545 | 18.159361 |
| O  | -5.564864 | 0.445401  | 15.696558 |
| O  | -5.006184 | -2.838911 | 16.038088 |
| Ti | -3.826760 | -4.374703 | 16.658484 |
| O  | -9.449517 | -3.748440 | 18.435859 |
| O  | -3.903308 | -4.040499 | 18.461293 |
| O  | -5.049764 | -2.370468 | 20.820168 |
| Ti | -3.931028 | -3.957866 | 20.356368 |
| Ti | -6.713336 | -6.965868 | 16.671376 |
| O  | -8.304312 | -5.681910 | 16.140592 |
| O  | -5.162984 | -5.588877 | 20.258081 |

|    |           |            |           |
|----|-----------|------------|-----------|
| O  | -5.522212 | -8.241905  | 20.622268 |
| O  | -7.330680 | -7.040660  | 18.525666 |
| Ti | -6.718140 | -6.674793  | 20.246831 |
| O  | -7.813888 | -5.028727  | 20.957536 |
| O  | -5.180565 | -5.819193  | 16.261921 |
| O  | -2.573945 | -9.305368  | 16.002377 |
| O  | -2.373435 | -8.711610  | 20.608405 |
| O  | -2.571471 | -5.692206  | 20.759670 |
| Ti | -3.700530 | -7.298450  | 20.258978 |
| O  | -3.570111 | -7.466659  | 18.438025 |
| O  | -2.520777 | -6.034119  | 16.490625 |
| Ti | -3.677059 | -7.768624  | 16.550075 |
| O  | -5.552788 | -8.426836  | 16.645480 |
| O  | -2.209887 | -3.247949  | 16.221710 |
| O  | -2.225044 | -2.996335  | 20.368557 |
| O  | 0.480858  | -5.978036  | 20.934756 |
| Ti | -0.845751 | -4.635350  | 20.379925 |
| O  | -0.736054 | -4.897214  | 18.548363 |
| O  | 0.395686  | -6.429126  | 16.132263 |
| Ti | -0.798135 | -4.952820  | 16.649435 |
| O  | 3.461949  | -3.746222  | 16.286205 |
| Ti | 4.760452  | -5.131264  | 16.858705 |
| O  | 4.674377  | -4.857454  | 18.667265 |
| O  | 3.345572  | -3.459628  | 21.039343 |
| Ti | 4.676831  | -4.828232  | 20.600666 |
| O  | 6.090652  | -6.554555  | 20.966472 |
| O  | 6.206912  | -6.790575  | 16.777262 |
| O  | 6.556028  | -4.245029  | 16.444436 |
| O  | 6.464638  | -3.971671  | 20.561913 |
| O  | 12.270506 | -7.752319  | 20.989578 |
| Ti | 10.471813 | -8.627473  | 20.782068 |
| O  | 10.876735 | -9.168213  | 19.008634 |
| O  | 12.158747 | -8.477452  | 16.349567 |
| Ti | 10.567443 | -9.024099  | 17.196983 |
| O  | 9.369618  | -10.322800 | 20.879784 |
| O  | 9.206403  | -7.195269  | 21.005668 |
| Ti | 7.847864  | -5.660917  | 20.630044 |
| O  | 8.136712  | -5.963139  | 18.807369 |
| O  | 9.338222  | -7.513395  | 16.695933 |
| Ti | 7.978283  | -5.977578  | 16.938761 |
| Ti | 1.788016  | -7.720883  | 16.726956 |
| O  | 1.659754  | -7.374286  | 18.513020 |
| Ti | 1.712342  | -7.395913  | 20.442742 |
| Ti | -0.948448 | -10.513091 | 16.452925 |
| O  | 0.460296  | -9.032347  | 20.002672 |
| O  | 0.177103  | -11.679373 | 20.458361 |
| O  | -1.545960 | -10.597247 | 18.278939 |
| Ti | -1.091064 | -10.126354 | 20.043188 |
| O  | 0.534707  | -9.264803  | 16.249058 |
| Ti | 5.064511  | -12.595192 | 19.814928 |
| O  | 4.904676  | -13.422012 | 18.162579 |
| Ti | 5.455843  | -11.914325 | 17.001183 |



|    |           |            |           |
|----|-----------|------------|-----------|
| O  | 5.622231  | -10.975818 | 18.817842 |
| O  | 3.886981  | -11.962429 | 15.785078 |
| O  | 3.333182  | -11.957781 | 20.473286 |
| O  | 3.047542  | -9.098561  | 20.787261 |
| Ti | 1.898648  | -10.629429 | 20.104838 |
| O  | 2.202399  | -10.956469 | 18.286966 |
| O  | 3.169153  | -9.304279  | 16.495529 |
| Ti | 2.095547  | -11.075654 | 16.400897 |
| O  | 0.342039  | -11.919396 | 16.351385 |
| O  | 3.475323  | -6.651345  | 16.337009 |
| O  | 3.399595  | -6.412598  | 20.620456 |
| Ti | 7.460817  | -10.581831 | 20.046765 |
| O  | 8.151181  | -9.995081  | 18.327828 |
| O  | 9.906803  | -10.447708 | 16.172653 |
| Ti | 8.008288  | -10.478153 | 16.468634 |
| O  | 7.262727  | -12.250291 | 16.531775 |
| O  | 6.948521  | -12.535507 | 20.459000 |
| O  | 6.200437  | -9.369886  | 20.900526 |
| Ti | 4.772103  | -8.058452  | 20.489714 |
| O  | 4.785980  | -8.082946  | 18.634344 |
| O  | 6.017096  | -9.896835  | 16.363821 |
| Ti | 4.907129  | -8.348111  | 16.758574 |
| Ti | 0.085787  | 1.873909   | 23.132508 |
| O  | 0.275681  | 1.272245   | 24.947017 |
| O  | -1.158030 | 0.920245   | 27.427464 |
| Ti | 0.560510  | 1.381074   | 26.783923 |
| O  | 1.601113  | 2.992355   | 26.693893 |
| O  | 1.026465  | 3.536601   | 22.860217 |
| O  | 1.460260  | 0.607405   | 22.575041 |
| Ti | 3.150760  | -0.232757  | 23.320645 |
| O  | 3.216581  | -0.517773  | 25.242519 |
| O  | 1.900639  | 0.423976   | 27.702434 |
| Ti | 3.293531  | -0.679308  | 27.061197 |
| O  | 4.631027  | -2.231637  | 27.537386 |
| O  | 4.452405  | -1.929567  | 23.113677 |
| Ti | 2.926391  | 3.555697   | 22.874513 |
| O  | 3.146499  | 4.521795   | 24.510335 |
| Ti | 3.185104  | 3.049360   | 25.698064 |
| O  | 3.186101  | 1.862682   | 24.107652 |
| O  | 4.662738  | 2.864109   | 26.812437 |
| O  | 4.997211  | 3.662478   | 22.568304 |
| O  | 5.026114  | 0.628093   | 22.809766 |
| Ti | 6.256001  | 2.250038   | 23.052369 |
| O  | 6.428909  | 2.221540   | 24.887283 |
| O  | 5.134926  | 0.266771   | 27.363640 |
| Ti | 6.265426  | 1.778965   | 26.737486 |
| O  | 7.974905  | 2.404544   | 27.391848 |
| O  | 7.623828  | 0.056429   | 26.352946 |
| O  | 7.616433  | 0.420088   | 23.016394 |
| O  | 8.020243  | 3.114204   | 22.477790 |
| O  | 9.624222  | 1.835370   | 24.719130 |
| Ti | 9.161199  | 1.488982   | 22.908472 |

|    |           |           |           |
|----|-----------|-----------|-----------|
| Ti | 9.134320  | 1.207912  | 26.425969 |
| Ti | 6.306406  | -1.444377 | 26.839002 |
| O  | 6.245657  | -1.736842 | 25.022539 |
| Ti | 6.282303  | -1.178170 | 23.193674 |
| O  | -1.764543 | 1.540553  | 22.934620 |
| O  | 7.716352  | -2.433425 | 22.707952 |
| Ti | 8.973361  | -3.879871 | 23.279383 |
| O  | 8.734955  | -3.533511 | 25.132828 |
| O  | 7.658229  | -2.313635 | 27.819865 |
| Ti | 8.830602  | -3.531406 | 27.003580 |
| O  | 10.093531 | -5.143521 | 27.624015 |
| O  | 10.300204 | -5.555934 | 22.980638 |
| O  | 10.634942 | 0.308129  | 27.108333 |
| O  | 10.745903 | 0.386471  | 22.438315 |
| O  | 10.644193 | -2.733600 | 22.725921 |
| Ti | 11.931410 | -1.121526 | 22.803439 |
| O  | 11.808384 | -1.001649 | 24.669376 |
| O  | 10.624983 | -2.553000 | 27.233641 |
| Ti | 11.813460 | -1.104870 | 26.555298 |
| O  | 13.716272 | -0.539812 | 26.729345 |
| O  | 13.095943 | -2.981652 | 26.521977 |
| O  | 13.194052 | -2.858627 | 22.763252 |
| O  | 13.757242 | -0.346259 | 22.059936 |
| O  | 15.315976 | -1.510432 | 24.144989 |
| Ti | 14.850963 | -2.005179 | 22.388097 |
| O  | 15.764713 | -3.641112 | 21.705099 |
| Ti | 14.606527 | -1.961880 | 25.868366 |
| O  | 15.885708 | -3.303058 | 26.253192 |
| Ti | 15.587965 | -4.924066 | 25.297906 |
| Ti | 15.278741 | -5.482945 | 22.469126 |
| O  | 15.386180 | -6.475844 | 26.329190 |
| Ti | 13.637472 | -7.211052 | 26.384860 |
| O  | 13.116897 | -7.558491 | 24.618612 |
| O  | 15.329877 | -7.417249 | 22.473106 |
| Ti | 13.541778 | -7.941410 | 22.741335 |
| O  | 14.074554 | -4.697937 | 24.182368 |
| O  | 12.800658 | -5.807670 | 27.304590 |
| Ti | 11.709802 | -4.387581 | 26.766473 |
| O  | 16.669868 | -5.292285 | 23.837497 |
| O  | 11.352790 | -4.474329 | 24.972835 |
| O  | 13.151885 | -5.938793 | 22.335025 |
| Ti | 12.031870 | -4.496744 | 23.169118 |
| Ti | -2.489137 | -0.224816 | 23.089597 |
| O  | -2.244773 | -0.509488 | 24.993412 |
| O  | -3.780755 | -1.350202 | 27.409497 |
| Ti | -2.076331 | -0.660772 | 26.836970 |
| O  | -1.143549 | -1.536613 | 22.570445 |
| Ti | 0.224564  | -2.922260 | 23.131990 |
| O  | 0.266074  | -2.957863 | 25.035888 |
| O  | -0.887501 | -1.942587 | 27.482283 |
| Ti | 0.402299  | -3.187268 | 26.876405 |
| O  | 1.789182  | -4.869661 | 27.229651 |

|    |           |            |           |
|----|-----------|------------|-----------|
| O  | 1.624561  | -4.623063  | 23.135636 |
| O  | 1.921381  | -1.921845  | 22.858715 |
| O  | 2.066701  | -2.268677  | 27.416593 |
| Ti | 3.466016  | -3.824055  | 26.986992 |
| O  | 3.562559  | -3.811979  | 25.153291 |
| Ti | 3.366577  | -3.645002  | 23.240144 |
| Ti | -7.051964 | -5.216757  | 23.081195 |
| Ti | -6.558808 | -5.411542  | 25.852023 |
| O  | -6.700222 | -3.361245  | 22.795971 |
| Ti | -4.965883 | -2.596969  | 23.051371 |
| O  | -4.583079 | -2.662168  | 24.924442 |
| O  | -6.229520 | -3.881846  | 26.851970 |
| Ti | -4.529773 | -2.947216  | 26.752730 |
| O  | -5.487458 | -5.572173  | 24.265523 |
| O  | -4.267376 | -0.820171  | 22.859569 |
| O  | -3.824505 | -4.080060  | 22.489120 |
| Ti | -2.658474 | -5.583584  | 23.119604 |
| O  | -8.076849 | -5.266426  | 24.681284 |
| O  | -2.297867 | -4.906657  | 24.868488 |
| O  | -3.541222 | -4.352385  | 27.522475 |
| Ti | -2.354009 | -5.485102  | 26.624388 |
| Ti | -5.398151 | -8.341795  | 22.736461 |
| O  | -7.029224 | -7.070097  | 22.292568 |
| O  | -3.518463 | -7.008102  | 25.998074 |
| O  | -3.921625 | -9.402226  | 27.009165 |
| O  | -5.856319 | -8.730023  | 24.549252 |
| Ti | -5.019014 | -8.149556  | 26.110062 |
| O  | -6.353373 | -6.999485  | 26.837238 |
| O  | -3.920811 | -7.097638  | 22.601573 |
| O  | -1.366082 | -10.615404 | 22.123264 |
| O  | -0.667808 | -10.036824 | 26.865787 |
| O  | -1.258570 | -7.251305  | 27.247327 |
| Ti | -2.126001 | -8.844711  | 26.486005 |
| O  | -2.080372 | -9.045105  | 24.637887 |
| O  | -1.370195 | -7.233708  | 22.919013 |
| Ti | -2.378891 | -9.047155  | 22.761104 |
| O  | -4.184227 | -9.773724  | 22.629548 |
| O  | -0.956128 | -4.543488  | 22.657918 |
| O  | -0.693447 | -4.776838  | 27.439419 |
| O  | 1.703033  | -7.841549  | 27.424616 |
| Ti | 0.579312  | -6.405543  | 26.865323 |
| O  | 0.430934  | -6.424112  | 25.027457 |
| O  | 1.459011  | -7.844510  | 22.550167 |
| Ti | 0.424636  | -6.249713  | 23.104938 |
| O  | 4.746863  | -4.996142  | 22.757936 |
| Ti | 5.951823  | -6.485354  | 23.318307 |
| O  | 5.953148  | -5.963578  | 25.150991 |
| O  | 4.690058  | -4.964050  | 27.846155 |
| Ti | 5.941883  | -6.068783  | 27.009372 |
| O  | 7.325033  | -7.667542  | 27.459756 |
| O  | 7.430163  | -8.075767  | 23.082357 |
| O  | 7.724089  | -5.475176  | 22.874285 |

|    |           |            |           |
|----|-----------|------------|-----------|
| O  | 7.637254  | -5.111086  | 27.343175 |
| O  | 13.187985 | -8.708876  | 27.462574 |
| Ti | 11.499349 | -9.497774  | 27.117444 |
| O  | 12.007903 | -10.206312 | 25.432366 |
| O  | 13.290896 | -9.793218  | 22.750685 |
| Ti | 11.668895 | -10.214898 | 23.612387 |
| O  | 10.359196 | -10.994099 | 27.424466 |
| O  | 10.317400 | -8.101001  | 27.417121 |
| Ti | 9.021107  | -6.748342  | 26.971454 |
| O  | 9.162366  | -6.949508  | 25.146564 |
| O  | 10.514431 | -8.719838  | 22.968732 |
| Ti | 9.170193  | -7.200517  | 23.234859 |
| Ti | 2.925725  | -8.963641  | 23.287525 |
| O  | 3.235366  | -7.620208  | 24.758753 |
| Ti | 3.164596  | -8.402263  | 26.412541 |
| Ti | 0.288029  | -11.783107 | 22.561966 |
| O  | 2.160042  | -9.905263  | 25.170557 |
| O  | 1.775731  | -12.023320 | 26.923774 |
| O  | -0.162515 | -11.789642 | 24.429428 |
| Ti | 0.637527  | -10.920110 | 25.864978 |
| O  | 1.750820  | -10.529410 | 22.478050 |
| Ti | 6.405802  | -13.038877 | 25.486489 |
| O  | 6.457321  | -14.239465 | 24.072267 |
| Ti | 6.737308  | -12.971661 | 22.606917 |
| O  | 6.310754  | -11.575576 | 24.266942 |
| O  | 4.925857  | -13.297912 | 21.841574 |
| O  | 4.998966  | -12.949330 | 26.737462 |
| O  | 4.300708  | -10.153666 | 26.823124 |
| Ti | 3.531334  | -11.845673 | 26.223647 |
| O  | 3.404765  | -12.528272 | 24.479910 |
| O  | 4.274215  | -10.544565 | 22.947196 |
| Ti | 3.258995  | -12.340810 | 22.595100 |
| O  | 1.521053  | -13.216519 | 22.477442 |
| O  | 4.683649  | -8.000407  | 22.725786 |
| O  | 4.739262  | -7.686960  | 27.379628 |
| Ti | 8.928702  | -11.321774 | 26.231742 |
| O  | 9.466027  | -10.930688 | 24.432396 |
| O  | 11.299894 | -11.714476 | 22.522934 |
| Ti | 9.419920  | -11.643341 | 22.539878 |
| O  | 8.661433  | -13.333355 | 22.512908 |
| O  | 8.138944  | -13.025287 | 26.243441 |
| O  | 7.508629  | -10.383705 | 27.053192 |
| Ti | 6.140764  | -9.139224  | 26.748318 |
| O  | 6.047648  | -8.945267  | 24.950026 |
| O  | 7.496775  | -10.926432 | 22.304678 |
| Ti | 6.102591  | -9.704592  | 23.113446 |

anatase-like 3-D (2,1,4)-mer

|    |           |          |           |
|----|-----------|----------|-----------|
| Ti | -4.449758 | 6.516340 | -1.911315 |
| O  | -4.980134 | 6.105822 | -0.118819 |
| O  | -6.814692 | 6.944540 | 1.772287  |
| Ti | -4.932295 | 6.835884 | 1.764818  |

|    |           |           |           |
|----|-----------|-----------|-----------|
| O  | -4.209253 | 8.551321  | 1.717925  |
| O  | -3.674656 | 8.220334  | -1.976623 |
| O  | -3.015844 | 5.561246  | -2.686954 |
| Ti | -1.672795 | 4.287709  | -2.388066 |
| O  | -1.568300 | 4.007743  | -0.592381 |
| O  | -2.989829 | 6.171243  | 2.014894  |
| Ti | -1.660623 | 4.905906  | 1.213324  |
| O  | -0.252559 | 3.205925  | 1.576275  |
| O  | -0.271475 | 2.851221  | -3.082680 |
| Ti | -1.932237 | 8.201178  | -1.229542 |
| O  | -1.987878 | 9.425313  | 0.155339  |
| Ti | -2.299600 | 8.189032  | 1.651943  |
| O  | -1.852532 | 6.744483  | -0.005429 |
| O  | -0.444012 | 8.565452  | 2.334245  |
| O  | -0.532402 | 8.100950  | -2.497341 |
| O  | 0.156716  | 5.302651  | -2.497210 |
| Ti | 0.934726  | 7.010836  | -1.975037 |
| O  | 1.080541  | 7.728075  | -0.249464 |
| O  | 0.175969  | 5.746642  | 1.322751  |
| Ti | 1.215957  | 7.540950  | 1.630390  |
| O  | 2.963238  | 8.405380  | 1.759720  |
| O  | 2.709662  | 5.718090  | 1.775867  |
| O  | 2.304941  | 5.061270  | -0.887005 |
| O  | 2.695766  | 7.158644  | -2.671670 |
| O  | 4.635110  | 6.945974  | -0.168800 |
| Ti | 3.825668  | 6.065117  | -1.592140 |
| Ti | 4.182278  | 6.962471  | 1.699287  |
| Ti | 1.517477  | 4.145221  | 1.007506  |
| O  | 1.224378  | 2.774678  | -0.446993 |
| Ti | 1.301185  | 3.548335  | -2.105405 |
| O  | -5.874721 | 6.187255  | -3.114529 |
| O  | 2.766383  | 3.013483  | -3.134167 |
| Ti | 3.907110  | 1.582313  | -2.609864 |
| O  | 4.065732  | 1.603848  | -0.774830 |
| O  | 3.018824  | 3.038547  | 1.709190  |
| Ti | 4.037160  | 1.441161  | 1.151402  |
| O  | 5.425348  | -0.266731 | 1.587434  |
| O  | 5.181200  | -0.044247 | -3.191615 |
| O  | 5.836910  | 5.792908  | 2.149305  |
| O  | 5.145209  | 5.187353  | -2.586490 |
| O  | 5.753290  | 2.423070  | -2.990115 |
| Ti | 6.614736  | 4.012455  | -2.211952 |
| O  | 6.584364  | 4.223552  | -0.363405 |
| O  | 5.846648  | 2.412292  | 1.345267  |
| Ti | 6.851658  | 4.225719  | 1.517574  |
| O  | 8.661449  | 4.950141  | 1.663554  |
| O  | 8.396974  | 2.273662  | 1.687431  |
| O  | 7.997151  | 2.178946  | -1.701553 |
| O  | 8.413710  | 4.564094  | -2.736449 |
| O  | 10.338468 | 3.900417  | -0.255087 |
| Ti | 9.499736  | 3.317173  | -1.816356 |
| O  | 10.836272 | 2.167854  | -2.542941 |

|    |            |           |           |
|----|------------|-----------|-----------|
| Ti | 9.871250   | 3.516816  | 1.556735  |
| O  | 11.500431  | 2.239622  | 2.009901  |
| Ti | 11.520820  | 0.384645  | 1.217967  |
| Ti | 11.035851  | 0.581557  | -1.556110 |
| O  | 11.180251  | -1.473367 | 1.484000  |
| Ti | 9.439787   | -2.224234 | 1.214312  |
| O  | 9.058976   | -2.154331 | -0.662301 |
| O  | 10.716813  | -0.940755 | -2.568389 |
| Ti | 9.009498   | -1.868217 | -2.489325 |
| O  | 9.960317   | 0.744079  | 0.028399  |
| O  | 8.307176   | -0.732768 | 1.777070  |
| Ti | 7.134731   | 0.766628  | 1.136741  |
| O  | 12.551200  | 0.439333  | -0.381160 |
| O  | 6.781819   | 0.067993  | -0.609228 |
| O  | 8.034639   | -0.456349 | -3.264858 |
| Ti | 6.835807   | 0.658560  | -2.360314 |
| Ti | -6.992848  | 4.686672  | -2.794308 |
| O  | -7.509484  | 5.390128  | -1.104906 |
| O  | -8.847629  | 5.091946  | 1.656232  |
| Ti | -7.233739  | 5.432088  | 0.731459  |
| O  | -5.812134  | 3.293170  | -3.132135 |
| Ti | -4.563749  | 1.914737  | -2.648660 |
| O  | -4.752353  | 2.113433  | -0.824462 |
| O  | -6.090275  | 3.943311  | 1.394777  |
| Ti | -4.756905  | 2.424764  | 1.092363  |
| O  | -3.310807  | 0.680517  | 1.378384  |
| O  | -3.172002  | 0.317863  | -3.184244 |
| O  | -2.870797  | 2.851812  | -3.117036 |
| O  | -3.025285  | 3.299991  | 1.227138  |
| Ti | -1.545251  | 1.713756  | 0.918125  |
| O  | -1.522094  | 1.114490  | -0.902151 |
| Ti | -1.480713  | 1.232855  | -2.754669 |
| Ti | -10.985898 | 0.134127  | -0.960990 |
| Ti | -10.709797 | 0.719764  | 1.886272  |
| O  | -10.852281 | 1.691407  | -1.992565 |
| Ti | -9.115718  | 2.464387  | -1.925902 |
| O  | -8.674447  | 2.906825  | -0.173657 |
| O  | -10.846611 | 2.646447  | 1.944118  |
| Ti | -9.073392  | 3.238752  | 1.726484  |
| O  | -9.451921  | -0.043858 | 0.166968  |
| O  | -8.676800  | 3.871043  | -3.121166 |
| O  | -8.132816  | 0.992066  | -2.521083 |
| Ti | -7.081191  | -0.523351 | -2.161660 |
| O  | -12.069184 | 0.493934  | 0.491683  |
| O  | -6.423978  | -0.639807 | -0.411524 |
| O  | -8.583065  | 1.228651  | 2.001569  |
| Ti | -7.553317  | -0.331523 | 1.246987  |
| Ti | -10.091595 | -2.880982 | -1.448245 |
| O  | -11.308171 | -1.502666 | -1.883324 |
| O  | -8.724029  | -1.989981 | 1.483971  |
| O  | -9.276884  | -4.473117 | 2.334706  |
| O  | -10.866830 | -3.354938 | 0.234241  |

|    |            |           |           |
|----|------------|-----------|-----------|
| Ti | -10.353590 | -2.834285 | 1.981910  |
| O  | -11.194764 | -1.136214 | 2.622359  |
| O  | -8.529291  | -1.830636 | -1.921426 |
| O  | -6.169748  | -5.185509 | -2.792321 |
| O  | -6.268138  | -5.255491 | 1.910617  |
| O  | -6.175794  | -2.137582 | 1.658402  |
| Ti | -7.442606  | -3.728028 | 1.567992  |
| O  | -7.333749  | -3.952661 | -0.300794 |
| O  | -6.082293  | -2.328326 | -2.812957 |
| Ti | -7.296879  | -3.762399 | -2.175413 |
| O  | -9.219134  | -4.231662 | -2.428249 |
| O  | -5.623181  | 0.265867  | -3.222366 |
| O  | -5.884471  | 0.816494  | 1.436191  |
| O  | -3.296914  | -2.399508 | 1.514853  |
| Ti | -4.580451  | -0.917400 | 0.934076  |
| O  | -3.993674  | -1.286599 | -0.894853 |
| O  | -3.145234  | -2.528998 | -3.623364 |
| Ti | -4.252764  | -1.312907 | -2.720041 |
| O  | -0.215564  | 0.145267  | -3.606261 |
| Ti | 1.011207   | -0.998566 | -2.767082 |
| O  | 0.912478   | -1.015464 | -0.934733 |
| O  | -0.307298  | 0.211949  | 1.451676  |
| Ti | 1.072862   | -1.137973 | 0.984487  |
| O  | 2.539599   | -2.878509 | 1.357551  |
| O  | 2.413947   | -2.545971 | -3.212643 |
| O  | 2.694188   | 0.053302  | -2.987437 |
| O  | 2.839809   | -0.185325 | 1.088245  |
| O  | 8.740075   | -4.001135 | 1.377494  |
| Ti | 6.962259   | -4.590236 | 1.125965  |
| O  | 6.723933   | -4.310025 | -0.778282 |
| O  | 8.263365   | -3.457077 | -3.168706 |
| Ti | 6.551921   | -4.152746 | -2.620782 |
| O  | 6.237719   | -6.359555 | 1.260841  |
| O  | 5.618102   | -3.276665 | 1.644757  |
| Ti | 4.241142   | -1.880394 | 1.088846  |
| O  | 4.214029   | -1.867457 | -0.813360 |
| O  | 5.366129   | -2.872586 | -3.269501 |
| Ti | 4.072850   | -1.632710 | -2.652360 |
| Ti | -1.807784  | -3.412554 | -2.636838 |
| O  | -1.729039  | -3.163435 | -0.812000 |
| Ti | -1.840770  | -3.618231 | 1.035945  |
| Ti | -4.646066  | -6.071668 | -2.137988 |
| O  | -3.134814  | -5.246185 | 1.265154  |
| O  | -3.521270  | -7.946473 | 1.788183  |
| O  | -5.119933  | -6.667613 | -0.416138 |
| Ti | -4.676763  | -6.313291 | 1.404081  |
| O  | -3.143805  | -4.902099 | -2.147427 |
| Ti | 1.568903   | -8.351137 | 1.339814  |
| O  | 1.336672   | -9.328409 | -0.294593 |
| Ti | 1.293840   | -7.860866 | -1.483543 |
| O  | 1.287059   | -6.667925 | 0.100190  |
| O  | -0.185395  | -7.699731 | -2.599614 |

|    |           |           |           |
|----|-----------|-----------|-----------|
| O  | -0.500679 | -8.496822 | 1.657461  |
| O  | -0.556521 | -5.442155 | 1.405489  |
| Ti | -1.769488 | -7.077958 | 1.186300  |
| O  | -1.941783 | -7.044654 | -0.647746 |
| O  | -0.643152 | -5.114704 | -3.157579 |
| Ti | -1.789224 | -6.618338 | -2.503895 |
| O  | -3.502980 | -7.277163 | -3.113180 |
| O  | -0.144538 | -2.599065 | -3.335260 |
| O  | 0.003909  | -2.866774 | 1.120064  |
| Ti | 4.384831  | -6.662125 | 1.039576  |
| O  | 4.199019  | -6.041225 | -0.765812 |
| O  | 5.642741  | -5.733157 | -3.232465 |
| Ti | 3.917781  | -6.181694 | -2.599846 |
| O  | 2.877261  | -7.792476 | -2.483142 |
| O  | 3.473604  | -8.334737 | 1.310334  |
| O  | 3.011389  | -5.401761 | 1.606876  |
| Ti | 1.303709  | -4.559220 | 0.877656  |
| O  | 1.278428  | -4.295959 | -1.045906 |
| O  | 2.578204  | -5.237390 | -3.534114 |
| Ti | 1.190632  | -4.143142 | -2.866559 |
| Ti | -3.001334 | 5.823158  | 4.395148  |
| O  | -3.640826 | 5.313094  | 6.161738  |
| O  | -5.027915 | 5.785059  | 8.350046  |
| Ti | -3.124321 | 5.838947  | 8.277675  |
| O  | -2.485360 | 7.642495  | 7.861045  |
| O  | -2.506061 | 7.807575  | 3.794951  |
| O  | -1.822761 | 4.555445  | 3.443281  |
| Ti | -0.368399 | 3.269576  | 3.791044  |
| O  | -0.259458 | 3.192842  | 5.630082  |
| O  | -1.287008 | 5.203069  | 7.584831  |
| Ti | -0.380002 | 3.513312  | 7.514945  |
| O  | 1.082725  | 1.795527  | 7.892167  |
| O  | 1.038832  | 1.617546  | 3.602687  |
| Ti | -0.599941 | 7.907592  | 4.311283  |
| O  | -0.352125 | 8.764514  | 5.933297  |
| Ti | -0.828515 | 7.248368  | 7.099394  |
| O  | -1.101051 | 6.275475  | 5.320526  |
| O  | 0.675599  | 7.271003  | 8.392137  |
| O  | 1.134676  | 7.168960  | 3.731299  |
| O  | 1.387619  | 4.286362  | 3.463116  |
| Ti | 2.536316  | 5.821512  | 4.134663  |
| O  | 2.237501  | 6.155407  | 5.955181  |
| O  | 1.388652  | 4.450090  | 7.785544  |
| Ti | 2.440435  | 6.236546  | 7.829382  |
| O  | 4.177969  | 7.090900  | 7.892982  |
| O  | 3.985841  | 4.435966  | 7.996760  |
| O  | 3.973192  | 4.224781  | 4.256399  |
| O  | 4.280916  | 6.858629  | 3.802447  |
| O  | 6.034094  | 5.755044  | 5.981675  |
| Ti | 5.534377  | 5.298867  | 4.223174  |
| Ti | 5.464598  | 5.673044  | 7.815373  |
| Ti | 2.753303  | 2.874990  | 7.516580  |



|    |           |           |          |
|----|-----------|-----------|----------|
| O  | 2.864889  | 2.512927  | 5.731890 |
| Ti | 2.720537  | 2.578301  | 3.810240 |
| O  | -4.857434 | 5.569889  | 3.440179 |
| O  | 3.965717  | 1.154998  | 3.317541 |
| Ti | 5.300419  | -0.173471 | 3.856054 |
| O  | 5.227601  | 0.066103  | 5.693699 |
| O  | 4.197885  | 1.627827  | 8.105700 |
| Ti | 5.322187  | 0.088913  | 7.585322 |
| O  | 6.742917  | -1.620137 | 8.005966 |
| O  | 6.686520  | -1.815559 | 3.878133 |
| O  | 7.085440  | 4.486365  | 8.295740 |
| O  | 6.822351  | 3.877697  | 3.666218 |
| O  | 7.046272  | 0.867715  | 3.509084 |
| Ti | 8.156753  | 2.479615  | 4.028296 |
| O  | 8.034281  | 2.643188  | 5.852674 |
| O  | 7.053664  | 1.153403  | 7.778591 |
| Ti | 8.164817  | 2.916816  | 7.743401 |
| O  | 10.040798 | 3.566760  | 7.651046 |
| O  | 9.675580  | 0.970076  | 8.047141 |
| O  | 9.625177  | 0.768935  | 4.048174 |
| O  | 9.989310  | 3.419201  | 3.675636 |
| O  | 11.817536 | 2.193245  | 5.773382 |
| Ti | 11.177576 | 1.853246  | 4.051142 |
| O  | 12.271200 | 0.197290  | 3.350933 |
| Ti | 11.208686 | 2.107763  | 7.626647 |
| O  | 12.792606 | 0.818052  | 8.197442 |
| Ti | 12.816418 | -1.040951 | 7.456237 |
| Ti | 12.433572 | -1.173873 | 4.673368 |
| O  | 12.431325 | -2.915148 | 7.761387 |
| Ti | 10.640577 | -3.521996 | 7.850868 |
| O  | 10.081417 | -3.905400 | 6.078432 |
| O  | 12.207216 | -2.971716 | 4.175240 |
| Ti | 10.507614 | -3.842320 | 4.271397 |
| O  | 11.330350 | -0.782653 | 6.179931 |
| O  | 9.575085  | -1.977138 | 8.281702 |
| Ti | 8.369088  | -0.501328 | 7.607617 |
| O  | 13.919519 | -1.073951 | 5.893973 |
| O  | 8.426893  | -0.846333 | 5.804341 |
| O  | 9.517356  | -2.454926 | 3.440671 |
| Ti | 8.392677  | -0.863420 | 3.908277 |
| Ti | -5.983780 | 3.868003  | 3.591430 |
| O  | -6.226230 | 4.500526  | 5.330988 |
| O  | -7.121050 | 3.692827  | 7.863853 |
| Ti | -5.512371 | 4.440921  | 7.069397 |
| O  | -4.730949 | 2.424569  | 3.341884 |
| Ti | -3.421001 | 0.839943  | 3.620483 |
| O  | -3.682850 | 1.010019  | 5.467961 |
| O  | -4.494082 | 2.771325  | 7.605948 |
| Ti | -3.393420 | 1.098786  | 7.320314 |
| O  | -1.978772 | -0.650572 | 7.736188 |
| O  | -2.008440 | -0.842553 | 3.647352 |
| O  | -1.662979 | 1.744900  | 3.288966 |

|    |            |           |          |
|----|------------|-----------|----------|
| O  | -1.622276  | 1.910845  | 7.453927 |
| Ti | -0.193510  | 0.274815  | 7.326333 |
| O  | -0.156093  | -0.031959 | 5.523902 |
| Ti | -0.234143  | 0.039247  | 3.600418 |
| Ti | -10.485254 | -1.075855 | 4.680530 |
| Ti | -9.606914  | -0.511948 | 7.367393 |
| O  | -10.209667 | 0.790195  | 3.955380 |
| Ti | -8.198317  | 1.105872  | 4.196678 |
| O  | -7.347276  | 1.595532  | 5.822966 |
| O  | -9.501137  | 1.336221  | 7.835669 |
| Ti | -7.656835  | 1.897308  | 7.675468 |
| O  | -8.764031  | -0.778549 | 5.552967 |
| O  | -7.804830  | 3.019871  | 3.440686 |
| O  | -7.351380  | -0.462856 | 3.406629 |
| Ti | -6.071703  | -1.915676 | 3.937050 |
| O  | -11.294467 | -0.778959 | 6.294729 |
| O  | -5.931749  | -1.685038 | 5.760670 |
| O  | -7.481015  | -0.239324 | 8.134510 |
| Ti | -6.144341  | -1.585817 | 7.639028 |
| Ti | -8.997646  | -4.482225 | 4.462525 |
| O  | -10.423972 | -2.990822 | 4.121181 |
| O  | -7.320029  | -3.216607 | 7.634059 |
| O  | -8.032918  | -5.637812 | 8.482783 |
| O  | -9.611926  | -4.480723 | 6.300719 |
| Ti | -9.079095  | -3.885638 | 8.009572 |
| O  | -9.877862  | -2.179857 | 8.258437 |
| O  | -7.438824  | -3.400881 | 3.878201 |
| O  | -4.883209  | -6.771252 | 3.527320 |
| O  | -4.930564  | -6.559872 | 8.103132 |
| O  | -4.819836  | -3.405042 | 8.028619 |
| Ti | -6.148074  | -5.001716 | 7.791196 |
| O  | -5.820501  | -5.219431 | 5.985190 |
| O  | -4.812248  | -3.647218 | 3.772278 |
| Ti | -6.025664  | -5.256781 | 4.109443 |
| O  | -7.900425  | -5.964165 | 4.368058 |
| O  | -4.521799  | -0.841287 | 3.262079 |
| O  | -4.480881  | -0.571246 | 7.687232 |
| O  | -1.801046  | -3.697857 | 7.857518 |
| Ti | -3.142597  | -2.312746 | 7.391837 |
| O  | -3.047349  | -2.577883 | 5.585743 |
| O  | -1.666091  | -3.809054 | 3.237214 |
| Ti | -3.092298  | -2.523669 | 3.658871 |
| O  | 1.128029   | -1.324398 | 3.169285 |
| Ti | 2.399631   | -2.715046 | 3.695212 |
| O  | 2.257983   | -2.577431 | 5.542387 |
| O  | 1.145991   | -1.100184 | 7.863326 |
| Ti | 2.449782   | -2.519339 | 7.431029 |
| O  | 3.867713   | -4.252638 | 7.823955 |
| O  | 3.883844   | -4.310191 | 3.910094 |
| O  | 4.160557   | -1.792832 | 3.368390 |
| O  | 4.228612   | -1.645291 | 7.500218 |
| O  | 10.076083  | -5.308548 | 8.562789 |

|    |           |            |           |
|----|-----------|------------|-----------|
| Ti | 8.286006  | -6.184932  | 7.985233  |
| O  | 8.463955  | -6.393579  | 6.110231  |
| O  | 9.998020  | -5.564519  | 3.712752  |
| Ti | 8.263295  | -6.194885  | 4.219181  |
| O  | 7.194980  | -7.957728  | 8.322632  |
| O  | 7.003374  | -4.794190  | 8.155961  |
| Ti | 5.641854  | -3.306725  | 7.540295  |
| O  | 5.937732  | -3.653078  | 5.753619  |
| O  | 7.058675  | -4.913214  | 3.461022  |
| Ti | 5.651331  | -3.516495  | 3.845630  |
| Ti | -0.444985 | -5.280243  | 3.660760  |
| O  | -0.507158 | -5.320984  | 5.503663  |
| Ti | -0.535902 | -5.096140  | 7.400318  |
| Ti | -3.327478 | -8.031685  | 3.914502  |
| O  | -1.820606 | -6.752668  | 7.388756  |
| O  | -2.156500 | -9.346752  | 7.969961  |
| O  | -3.855471 | -8.195815  | 5.756306  |
| Ti | -3.419913 | -7.759961  | 7.535330  |
| O  | -1.740827 | -6.855373  | 3.586450  |
| Ti | 2.860817  | -10.210125 | 7.415422  |
| O  | 2.666295  | -11.215403 | 5.801516  |
| Ti | 2.930384  | -9.721456  | 4.612871  |
| O  | 2.966865  | -8.622594  | 6.180283  |
| O  | 1.570626  | -9.433792  | 3.296251  |
| O  | 0.975825  | -9.847859  | 7.966583  |
| O  | 0.849457  | -6.870730  | 7.855050  |
| Ti | -0.402136 | -8.440289  | 7.467875  |
| O  | -0.128245 | -8.657896  | 5.621321  |
| O  | 1.026714  | -7.002443  | 3.215226  |
| Ti | -0.352390 | -8.615571  | 3.751651  |
| O  | -2.091091 | -9.480036  | 3.830447  |
| O  | 1.259883  | -4.356378  | 3.245800  |
| O  | 1.212474  | -4.179284  | 7.511078  |
| Ti | 5.362493  | -8.245867  | 7.556061  |
| O  | 5.859599  | -7.685220  | 5.822216  |
| O  | 7.545077  | -7.838137  | 3.562365  |
| Ti | 5.732282  | -8.139332  | 4.015507  |
| O  | 4.708614  | -9.748394  | 3.969055  |
| O  | 4.786392  | -10.058015 | 7.642373  |
| O  | 4.063316  | -6.945713  | 8.084468  |
| Ti | 2.558217  | -5.798580  | 7.392454  |
| O  | 2.518334  | -6.057043  | 5.545579  |
| O  | 4.403198  | -6.989965  | 3.307259  |
| Ti | 2.727929  | -5.941755  | 3.679092  |
| Ti | -1.706131 | 4.252981   | 10.840735 |
| O  | -2.416789 | 3.792504   | 12.542217 |
| O  | -3.897940 | 4.622535   | 14.498299 |
| Ti | -1.989890 | 4.588850   | 14.587889 |
| O  | -1.352780 | 6.351191   | 14.030132 |
| O  | -1.581688 | 6.124196   | 9.982875  |
| O  | -0.637846 | 3.126038   | 9.651637  |
| Ti | 0.916270  | 1.926161   | 10.129716 |

|    |           |           |           |
|----|-----------|-----------|-----------|
| O  | 0.827163  | 1.845291  | 11.960321 |
| O  | -0.158722 | 3.958884  | 13.861801 |
| Ti | 0.669129  | 2.227682  | 13.825993 |
| O  | 2.127190  | 0.554540  | 14.233567 |
| O  | 2.322829  | 0.306958  | 10.019411 |
| Ti | 0.352050  | 6.504730  | 10.315436 |
| O  | 0.561787  | 7.419797  | 11.937735 |
| Ti | 0.314437  | 5.976979  | 13.253431 |
| O  | 0.152318  | 4.870876  | 11.516300 |
| O  | 1.712185  | 5.988888  | 14.666978 |
| O  | 2.250776  | 5.910569  | 9.906738  |
| O  | 2.619586  | 3.018283  | 9.888953  |
| Ti | 3.732046  | 4.660092  | 10.397364 |
| O  | 3.391086  | 5.026064  | 12.202799 |
| O  | 2.448888  | 3.214548  | 14.007985 |
| Ti | 3.494625  | 4.978639  | 14.100208 |
| O  | 5.215891  | 5.867274  | 14.169806 |
| O  | 5.046073  | 3.225264  | 14.298098 |
| O  | 5.182819  | 3.008072  | 10.481662 |
| O  | 5.500482  | 5.618588  | 9.948531  |
| O  | 7.102677  | 4.567823  | 12.210870 |
| Ti | 6.745854  | 4.068916  | 10.422906 |
| Ti | 6.533060  | 4.472981  | 14.051090 |
| Ti | 3.804290  | 1.636876  | 13.879370 |
| O  | 4.135206  | 1.318687  | 12.106899 |
| Ti | 4.008605  | 1.285922  | 10.207077 |
| O  | -3.258988 | 4.141619  | 9.575380  |
| O  | 5.207179  | -0.198778 | 9.737559  |
| Ti | 6.564430  | -1.501444 | 10.301496 |
| O  | 6.455492  | -1.216332 | 12.117662 |
| O  | 5.199996  | 0.353235  | 14.496493 |
| Ti | 6.540897  | -1.005117 | 14.027160 |
| O  | 7.925361  | -2.714284 | 14.546518 |
| O  | 7.988496  | -3.147255 | 10.208700 |
| O  | 8.175098  | 3.355908  | 14.527061 |
| O  | 8.165332  | 2.769813  | 9.887209  |
| O  | 8.253773  | -0.324966 | 9.963272  |
| Ti | 9.462528  | 1.316731  | 10.300487 |
| O  | 9.220468  | 1.666316  | 12.092019 |
| O  | 8.227928  | 0.120530  | 14.083656 |
| Ti | 9.359468  | 1.855174  | 13.977264 |
| O  | 11.260923 | 2.531199  | 13.818254 |
| O  | 10.809090 | -0.036401 | 14.251989 |
| O  | 10.806601 | -0.372349 | 10.592663 |
| O  | 11.321518 | 2.125122  | 9.770105  |
| O  | 13.061890 | 1.003170  | 11.972647 |
| Ti | 12.455514 | 0.547785  | 10.278560 |
| O  | 13.237208 | -1.250450 | 9.631045  |
| Ti | 12.380819 | 1.056537  | 13.817259 |
| O  | 13.779835 | -0.424642 | 14.229651 |
| Ti | 13.724841 | -2.307227 | 13.564783 |
| Ti | 13.085438 | -2.841432 | 10.799257 |

|    |           |           |           |
|----|-----------|-----------|-----------|
| O  | 13.512165 | -4.272651 | 14.169586 |
| Ti | 11.541967 | -4.659123 | 13.954334 |
| O  | 10.837834 | -5.135610 | 12.253190 |
| O  | 13.126271 | -4.719468 | 10.419162 |
| Ti | 11.309375 | -5.362986 | 10.414495 |
| O  | 12.111801 | -2.505041 | 12.516767 |
| O  | 10.917722 | -2.939655 | 14.713527 |
| Ti | 9.538392  | -1.586886 | 14.079650 |
| O  | 14.652093 | -2.489437 | 11.953273 |
| O  | 9.299573  | -2.103476 | 12.312126 |
| O  | 11.017027 | -3.317273 | 10.026005 |
| Ti | 9.576258  | -2.000022 | 10.468963 |
| Ti | -4.593229 | 2.595386  | 9.728716  |
| O  | -4.936696 | 3.250166  | 11.459089 |
| O  | -6.095556 | 2.647964  | 14.059919 |
| Ti | -4.426239 | 3.232194  | 13.284038 |
| O  | -3.448277 | 1.061476  | 9.586409  |
| Ti | -2.116329 | -0.487536 | 9.975729  |
| O  | -2.467159 | -0.182512 | 11.782533 |
| O  | -3.588902 | 1.482169  | 13.904210 |
| Ti | -2.428630 | -0.174114 | 13.665195 |
| O  | -1.016453 | -1.870579 | 14.091756 |
| O  | -0.696494 | -2.170834 | 9.919307  |
| O  | -0.355698 | 0.394254  | 9.657552  |
| O  | -0.634092 | 0.679445  | 13.831346 |
| Ti | 0.774318  | -0.955262 | 13.723110 |
| O  | 1.050428  | -1.289324 | 11.939932 |
| Ti | 1.076724  | -1.320179 | 10.022618 |
| Ti | -8.637297 | -2.456733 | 11.316855 |
| Ti | -8.283030 | -1.706491 | 14.150491 |
| O  | -8.587189 | -0.744145 | 10.543761 |
| Ti | -6.841870 | -0.014591 | 10.328757 |
| O  | -6.241553 | 0.484503  | 12.030880 |
| O  | -8.340396 | 0.210956  | 14.177862 |
| Ti | -6.536280 | 0.823637  | 13.917308 |
| O  | -7.033266 | -2.601448 | 12.371906 |
| O  | -6.391274 | 1.681059  | 9.393190  |
| O  | -5.894408 | -1.667438 | 9.887995  |
| Ti | -4.761360 | -3.280569 | 10.253696 |
| O  | -9.663001 | -2.095145 | 12.834596 |
| O  | -4.020435 | -3.272627 | 12.008791 |
| O  | -6.169475 | -1.253781 | 14.219269 |
| Ti | -5.262054 | -2.936121 | 13.548554 |
| Ti | -7.783634 | -5.761046 | 10.524510 |
| O  | -8.998080 | -3.980993 | 10.186824 |
| O  | -6.302257 | -4.703792 | 13.431269 |
| O  | -6.926574 | -7.064990 | 14.470834 |
| O  | -8.647725 | -5.821721 | 12.292550 |
| Ti | -7.993283 | -5.409737 | 14.004733 |
| O  | -8.619167 | -3.672435 | 14.769169 |
| O  | -6.163264 | -4.661166 | 10.121072 |
| O  | -3.666758 | -8.237870 | 9.634479  |

|    |           |            |           |
|----|-----------|------------|-----------|
| O  | -3.810411 | -7.878643  | 14.295543 |
| O  | -3.859320 | -4.703001  | 14.139901 |
| Ti | -5.035811 | -6.363086  | 13.860456 |
| O  | -4.537799 | -6.706412  | 12.100178 |
| O  | -3.496895 | -5.029012  | 10.006496 |
| Ti | -4.710277 | -6.646681  | 10.234201 |
| O  | -6.669780 | -7.214232  | 10.462520 |
| O  | -3.183860 | -2.191514  | 9.659873  |
| O  | -3.591326 | -1.772311  | 13.889470 |
| O  | -0.967326 | -4.901294  | 14.227348 |
| Ti | -2.266358 | -3.468396  | 13.533922 |
| O  | -1.358404 | -3.806603  | 11.908173 |
| O  | -0.604394 | -5.391188  | 9.533722  |
| Ti | -1.764297 | -3.894415  | 10.078317 |
| O  | 2.411087  | -2.715617  | 9.607780  |
| Ti | 3.716508  | -4.072405  | 10.181679 |
| O  | 3.644958  | -3.742236  | 12.001489 |
| O  | 2.146418  | -2.262615  | 14.334451 |
| Ti | 3.574675  | -3.531623  | 13.907882 |
| O  | 4.978233  | -5.238579  | 14.363740 |
| O  | 5.170179  | -5.712983  | 10.200155 |
| O  | 5.483743  | -3.163453  | 9.800056  |
| O  | 5.355243  | -2.673576  | 14.031868 |
| O  | 11.089082 | -6.520750  | 14.637599 |
| Ti | 9.287461  | -7.397814  | 14.404521 |
| O  | 9.732252  | -8.083393  | 12.697938 |
| O  | 11.041365 | -7.222116  | 10.178335 |
| Ti | 9.402245  | -7.871696  | 10.879615 |
| O  | 7.910855  | -8.933120  | 14.550555 |
| O  | 8.114696  | -5.884056  | 14.494730 |
| Ti | 6.773541  | -4.324430  | 14.081131 |
| O  | 7.011791  | -4.781721  | 12.277819 |
| O  | 8.282752  | -6.366255  | 10.150410 |
| Ti | 6.924750  | -4.848354  | 10.399388 |
| Ti | 0.765882  | -6.669932  | 10.127717 |
| O  | 0.683045  | -6.458137  | 11.938081 |
| Ti | 0.486383  | -6.099166  | 13.810431 |
| Ti | -2.055263 | -9.432110  | 10.103890 |
| O  | -0.697107 | -7.866553  | 13.654434 |
| O  | -0.946916 | -10.477110 | 14.222321 |
| O  | -2.596704 | -9.488046  | 11.951246 |
| Ti | -2.241290 | -8.973088  | 13.733045 |
| O  | -0.509059 | -8.235933  | 9.835058  |
| Ti | 4.212098  | -11.238895 | 13.766580 |
| O  | 4.085041  | -12.146416 | 12.121292 |
| Ti | 4.397190  | -10.739958 | 10.776441 |
| O  | 4.545656  | -9.624914  | 12.446956 |
| O  | 2.874560  | -10.821064 | 9.540099  |
| O  | 2.370137  | -10.665033 | 14.211283 |
| O  | 1.940937  | -7.846776  | 14.224521 |
| Ti | 0.779732  | -9.463901  | 13.753859 |
| O  | 1.088021  | -9.965030  | 11.971137 |

|    |           |            |           |
|----|-----------|------------|-----------|
| O  | 2.162062  | -8.290554  | 10.029723 |
| Ti | 0.971525  | -9.992579  | 10.084692 |
| O  | -0.784327 | -10.856281 | 10.061477 |
| O  | 2.449848  | -5.616328  | 9.736399  |
| O  | 2.223109  | -5.131358  | 13.934307 |
| Ti | 6.319708  | -8.973353  | 13.342750 |
| O  | 7.196100  | -8.456870  | 11.706896 |
| O  | 8.954801  | -9.416701  | 9.831795  |
| Ti | 7.069109  | -9.351470  | 9.941586  |
| O  | 6.237278  | -11.034540 | 10.270622 |
| O  | 6.152736  | -10.862851 | 14.136479 |
| O  | 5.170560  | -7.941089  | 14.477302 |
| Ti | 3.603991  | -6.697535  | 13.934658 |
| O  | 3.847688  | -6.988127  | 12.114970 |
| O  | 5.081264  | -8.751440  | 9.813934  |
| Ti | 3.849971  | -7.251016  | 10.244581 |
| Ti | -0.680583 | 2.918693   | 17.069620 |
| O  | -1.560271 | 2.400856   | 18.703031 |
| O  | -3.318009 | 3.358883   | 20.579526 |
| Ti | -1.432212 | 3.294608   | 20.469377 |
| O  | -0.601231 | 4.978040   | 20.137937 |
| O  | -0.515598 | 4.808079   | 16.273780 |
| O  | 0.463320  | 1.884738   | 15.931930 |
| Ti | 2.029582  | 0.639842   | 16.475747 |
| O  | 1.783189  | 0.933436   | 18.294724 |
| O  | 0.555729  | 2.695607   | 20.596398 |
| Ti | 1.784611  | 1.192696   | 20.165753 |
| O  | 3.184878  | -0.441167  | 20.673855 |
| O  | 3.410150  | -0.925567  | 16.476253 |
| Ti | 1.424559  | 5.185101   | 16.643143 |
| O  | 1.551281  | 6.091147   | 18.289088 |
| Ti | 1.239376  | 4.684192   | 19.633723 |
| O  | 1.092199  | 3.569671   | 17.962579 |
| O  | 2.761631  | 4.766342   | 20.870270 |
| O  | 3.265478  | 4.609289   | 16.198359 |
| O  | 3.693419  | 1.790005   | 16.185778 |
| Ti | 4.854535  | 3.406655   | 16.656294 |
| O  | 4.546636  | 3.907794   | 18.439115 |
| O  | 3.472127  | 2.233162   | 20.380178 |
| Ti | 4.663126  | 3.934963   | 20.325600 |
| O  | 6.419119  | 4.798666   | 20.348687 |
| O  | 6.143950  | 2.178514   | 20.575964 |
| O  | 6.330905  | 1.809425   | 16.755322 |
| O  | 6.581290  | 4.419872   | 16.187921 |
| O  | 8.231039  | 3.429582   | 18.459218 |
| Ti | 7.873571  | 2.915810   | 16.677378 |
| Ti | 7.690062  | 3.374596   | 20.307032 |
| Ti | 4.868903  | 0.612256   | 20.283458 |
| O  | 4.949815  | 0.401605   | 18.472678 |
| Ti | 5.146879  | 0.042326   | 16.600778 |
| O  | -2.268793 | 2.880268   | 15.860737 |
| O  | 6.601133  | -1.155090  | 16.182971 |

|    |           |           |           |
|----|-----------|-----------|-----------|
| Ti | 7.899288  | -2.588638 | 16.878526 |
| O  | 6.989438  | -2.249377 | 18.502878 |
| O  | 6.239988  | -0.665976 | 20.876510 |
| Ti | 7.399432  | -2.163574 | 20.332104 |
| O  | 8.818532  | -3.866969 | 20.750724 |
| O  | 9.224265  | -4.283911 | 16.524077 |
| O  | 9.301644  | 2.181339  | 20.776947 |
| O  | 9.445233  | 1.821198  | 16.115131 |
| O  | 9.490929  | -1.351851 | 16.274740 |
| Ti | 10.670046 | 0.306086  | 16.551035 |
| O  | 10.174610 | 0.651024  | 18.311249 |
| O  | 9.131613  | -1.028124 | 20.404798 |
| Ti | 10.344617 | 0.589575  | 20.177730 |
| O  | 12.304329 | 1.157637  | 19.949757 |
| O  | 11.797319 | -1.395978 | 20.291908 |
| O  | 11.936461 | -1.351849 | 16.982147 |
| O  | 12.562317 | 1.006794  | 15.939566 |
| O  | 14.281493 | -0.235553 | 18.119763 |
| Ti | 13.627168 | -0.649552 | 16.408548 |
| O  | 14.261138 | -2.382455 | 15.645103 |
| Ti | 13.417611 | -0.295682 | 19.888632 |
| O  | 14.631866 | -2.075047 | 20.226730 |
| Ti | 14.270509 | -3.599223 | 19.096452 |
| Ti | 13.919810 | -4.351313 | 16.263335 |
| O  | 14.220817 | -5.312516 | 19.868286 |
| Ti | 12.475553 | -6.042230 | 20.081093 |
| O  | 11.873372 | -6.537501 | 18.378463 |
| O  | 13.974720 | -6.267926 | 16.238235 |
| Ti | 12.166961 | -6.874603 | 16.490145 |
| O  | 12.666784 | -3.455429 | 18.040846 |
| O  | 11.528846 | -4.389785 | 20.525040 |
| Ti | 10.396178 | -2.777435 | 20.158491 |
| O  | 15.298144 | -3.959950 | 17.580361 |
| O  | 9.653187  | -2.784435 | 18.404096 |
| O  | 11.806772 | -4.796982 | 16.185808 |
| Ti | 10.895313 | -3.120497 | 16.863999 |
| Ti | -3.646022 | 1.347016  | 16.004952 |
| O  | -4.095742 | 2.025863  | 17.712397 |
| O  | -5.404840 | 1.161596  | 20.227049 |
| Ti | -3.765034 | 1.814531  | 19.530925 |
| O  | -2.481661 | -0.172285 | 15.916178 |
| Ti | -1.140617 | -1.733568 | 16.329883 |
| O  | -1.378398 | -1.274234 | 18.132751 |
| O  | -2.646003 | 0.309363  | 20.260194 |
| Ti | -1.289762 | -1.210820 | 20.011434 |
| O  | 0.151493  | -2.894535 | 20.610567 |
| O  | 0.277436  | -3.383249 | 16.378619 |
| O  | 0.654924  | -0.818488 | 16.046762 |
| O  | 0.464949  | -0.345302 | 20.209911 |
| Ti | 1.918526  | -1.984961 | 20.228889 |
| O  | 1.989624  | -2.314007 | 18.408680 |
| Ti | 2.058151  | -2.525942 | 16.502318 |



|    |           |           |           |
|----|-----------|-----------|-----------|
| Ti | -8.079477 | -3.755389 | 16.849075 |
| Ti | -7.450479 | -3.226330 | 19.611272 |
| O  | -7.862525 | -1.787421 | 16.246785 |
| Ti | -5.899928 | -1.380525 | 16.446857 |
| O  | -5.202092 | -0.927923 | 18.152183 |
| O  | -7.486325 | -1.343878 | 19.984300 |
| Ti | -5.673767 | -0.698151 | 19.994081 |
| O  | -6.474330 | -3.606362 | 17.908250 |
| O  | -5.452802 | 0.478210  | 15.766805 |
| O  | -5.285038 | -3.109769 | 15.703456 |
| Ti | -3.909658 | -4.467522 | 16.335136 |
| O  | -9.017305 | -3.556029 | 18.453404 |
| O  | -3.656158 | -3.951138 | 18.100795 |
| O  | -5.379651 | -2.740760 | 20.384765 |
| Ti | -3.941709 | -4.059962 | 19.942075 |
| Ti | -6.747415 | -7.113304 | 16.595033 |
| O  | -8.152614 | -5.639077 | 16.177904 |
| O  | -5.170581 | -5.687125 | 19.824594 |
| O  | -5.686878 | -8.185132 | 20.641167 |
| O  | -7.428007 | -7.063992 | 18.439805 |
| Ti | -6.821299 | -6.607777 | 20.133742 |
| O  | -7.608899 | -4.811771 | 20.783737 |
| O  | -5.175425 | -6.020879 | 16.158471 |
| O  | -2.539623 | -9.412785 | 15.883717 |
| O  | -2.530741 | -8.829361 | 20.523503 |
| O  | -2.618345 | -5.734374 | 20.447743 |
| Ti | -3.827567 | -7.376602 | 20.111082 |
| O  | -3.586449 | -7.722779 | 18.319013 |
| O  | -2.596324 | -6.176395 | 16.327710 |
| Ti | -3.725315 | -7.912274 | 16.433391 |
| O  | -5.626397 | -8.587826 | 16.592324 |
| O  | -2.293291 | -3.342468 | 15.864016 |
| O  | -2.353100 | -2.911109 | 20.203391 |
| O  | 0.428540  | -5.858261 | 20.673302 |
| Ti | -0.929589 | -4.557093 | 20.108815 |
| O  | -0.818237 | -4.841512 | 18.292812 |
| O  | 0.432429  | -6.409850 | 15.914179 |
| Ti | -0.910117 | -5.052005 | 16.383493 |
| O  | 3.487418  | -3.793835 | 16.075903 |
| Ti | 4.858875  | -5.101876 | 16.687882 |
| O  | 4.582750  | -4.766650 | 18.470988 |
| O  | 3.224127  | -3.342232 | 20.803023 |
| Ti | 4.558575  | -4.737948 | 20.388314 |
| O  | 5.990038  | -6.452140 | 20.753064 |
| O  | 6.267544  | -6.735427 | 16.579114 |
| O  | 6.649692  | -4.185773 | 16.319076 |
| O  | 6.331862  | -3.886976 | 20.490918 |
| O  | 12.027411 | -7.737422 | 21.018446 |
| Ti | 10.229344 | -8.650823 | 20.682755 |
| O  | 10.573274 | -9.303110 | 18.951133 |
| O  | 11.729002 | -8.699397 | 16.345985 |
| Ti | 10.062545 | -9.286603 | 17.126371 |

|    |           |            |           |
|----|-----------|------------|-----------|
| O  | 8.900229  | -10.198480 | 20.834164 |
| O  | 9.083415  | -7.118353  | 20.825173 |
| Ti | 7.750858  | -5.571231  | 20.434790 |
| O  | 8.099166  | -5.876625  | 18.627759 |
| O  | 9.226323  | -7.536177  | 16.505102 |
| Ti | 8.062139  | -5.883080  | 16.744712 |
| Ti | 1.828896  | -7.693124  | 16.530972 |
| O  | 1.497915  | -7.376673  | 18.303536 |
| Ti | 1.626294  | -7.343273  | 20.203280 |
| Ti | -0.898351 | -10.530379 | 16.359097 |
| O  | 0.451817  | -9.065643  | 19.929139 |
| O  | 0.134834  | -11.676856 | 20.461467 |
| O  | -1.467422 | -10.626112 | 18.199163 |
| Ti | -1.110912 | -10.127207 | 19.987339 |
| O  | 0.588052  | -9.282113  | 16.111696 |
| Ti | 5.284089  | -12.560353 | 20.093083 |
| O  | 5.075277  | -13.475280 | 18.470800 |
| Ti | 5.322944  | -12.032098 | 17.155185 |
| O  | 5.484298  | -10.926671 | 18.892966 |
| O  | 3.924486  | -12.043478 | 15.742803 |
| O  | 3.384527  | -11.968334 | 20.501940 |
| O  | 3.016929  | -9.076275  | 20.520875 |
| Ti | 1.902785  | -10.717928 | 20.012194 |
| O  | 2.242991  | -11.082304 | 18.206467 |
| O  | 3.185042  | -9.270753  | 16.401388 |
| Ti | 2.140422  | -11.035222 | 16.308930 |
| O  | 0.419340  | -11.924380 | 16.239143 |
| O  | 3.505987  | -6.610885  | 16.176867 |
| O  | 3.312234  | -6.364732  | 20.391009 |
| Ti | 7.343293  | -10.310492 | 19.570181 |
| O  | 8.053741  | -9.849124  | 17.868602 |
| O  | 9.535559  | -10.677926 | 15.912796 |
| Ti | 7.627498  | -10.642597 | 15.822111 |
| O  | 6.990261  | -12.406015 | 16.378553 |
| O  | 7.217334  | -12.181181 | 20.427673 |
| O  | 6.273492  | -9.182992  | 20.757255 |
| Ti | 4.718366  | -7.984191  | 20.279683 |
| O  | 4.805030  | -7.902187  | 18.449289 |
| O  | 5.796039  | -10.013535 | 16.547525 |
| Ti | 4.964583  | -8.284446  | 16.583702 |
| Ti | 0.275044  | 2.191101   | 22.855607 |
| O  | -0.224906 | 1.631488   | 24.588848 |
| O  | -1.909562 | 1.782133   | 26.849148 |
| Ti | -0.096947 | 2.084142   | 26.395911 |
| O  | 0.926601  | 3.693307   | 26.442615 |
| O  | 0.848885  | 4.004389   | 22.766017 |
| O  | 1.571425  | 0.888818   | 22.325989 |
| Ti | 3.075717  | -0.259658  | 23.017826 |
| O  | 3.116649  | 0.000947   | 24.864511 |
| O  | 1.232006  | 0.933842   | 27.102825 |
| Ti | 2.906125  | -0.116210  | 26.730861 |
| O  | 4.374486  | -1.701476  | 27.164154 |

|    |           |           |           |
|----|-----------|-----------|-----------|
| O  | 4.421877  | -1.878414 | 22.898816 |
| Ti | 2.774217  | 4.156056  | 22.994620 |
| O  | 2.969770  | 5.159937  | 24.609058 |
| Ti | 2.704266  | 3.665632  | 25.797549 |
| O  | 2.663953  | 2.567943  | 24.228916 |
| O  | 4.063534  | 3.376656  | 27.114077 |
| O  | 4.658419  | 3.790300  | 22.443921 |
| O  | 4.784622  | 0.812957  | 22.555492 |
| Ti | 6.036193  | 2.382676  | 22.943080 |
| O  | 5.760576  | 2.599618  | 24.789365 |
| O  | 4.607358  | 0.944488  | 27.195409 |
| Ti | 5.985820  | 2.557528  | 26.659170 |
| O  | 7.724371  | 3.422685  | 26.579900 |
| O  | 7.374627  | 0.797730  | 26.824351 |
| O  | 7.454280  | 0.695709  | 23.021963 |
| O  | 7.790590  | 3.289799  | 22.441054 |
| O  | 9.489042  | 2.138876  | 24.655172 |
| Ti | 9.053970  | 1.703035  | 22.876361 |
| Ti | 8.960976  | 1.974548  | 26.497129 |
| Ti | 6.079431  | -0.777528 | 26.749591 |
| O  | 6.142591  | -0.738076 | 24.906543 |
| Ti | 6.170032  | -0.961643 | 23.009535 |
| O  | -1.557276 | 1.901129  | 22.087890 |
| O  | 7.435646  | -2.360135 | 22.553824 |
| Ti | 8.777129  | -3.745786 | 23.018668 |
| O  | 8.684339  | -3.485806 | 24.825653 |
| O  | 7.300940  | -2.248653 | 27.173233 |
| Ti | 8.726096  | -3.534782 | 26.752685 |
| O  | 10.155564 | -5.217203 | 27.151363 |
| O  | 10.116018 | -5.486791 | 22.725130 |
| O  | 10.516753 | 0.714460  | 26.884210 |
| O  | 10.564469 | 0.503394  | 22.309141 |
| O  | 10.454049 | -2.653242 | 22.383607 |
| Ti | 11.781246 | -1.055530 | 22.621443 |
| O  | 11.449943 | -0.838714 | 24.426971 |
| O  | 10.445705 | -2.411109 | 26.639651 |
| Ti | 11.658446 | -0.800590 | 26.301969 |
| O  | 13.533071 | -0.092758 | 26.042025 |
| O  | 13.072294 | -2.655192 | 26.534026 |
| O  | 12.954012 | -2.840074 | 22.780104 |
| O  | 13.666097 | -0.417917 | 21.930562 |
| O  | 15.246463 | -1.575343 | 24.112181 |
| Ti | 14.713167 | -2.169970 | 22.403577 |
| O  | 15.513846 | -3.874810 | 22.154241 |
| Ti | 14.631390 | -1.573608 | 25.950212 |
| O  | 16.059163 | -3.064589 | 26.291615 |
| Ti | 16.123198 | -4.979018 | 25.732560 |
| Ti | 15.243832 | -5.541786 | 23.045200 |
| O  | 15.849280 | -6.845082 | 26.457878 |
| Ti | 13.838007 | -7.161055 | 26.215630 |
| O  | 12.985610 | -7.652067 | 24.589879 |
| O  | 15.138784 | -7.390206 | 22.576855 |

|    |           |            |           |
|----|-----------|------------|-----------|
| Ti | 13.294214 | -7.951028  | 22.736817 |
| O  | 14.402062 | -5.278706  | 24.860093 |
| O  | 12.990903 | -5.590974  | 27.003589 |
| Ti | 11.705361 | -4.141845  | 26.476581 |
| O  | 16.931914 | -5.274094  | 24.118117 |
| O  | 11.568327 | -4.376394  | 24.652935 |
| O  | 13.117203 | -5.816152  | 22.276906 |
| Ti | 11.779659 | -4.471653  | 22.774618 |
| Ti | -2.649387 | 0.128299   | 22.425148 |
| O  | -2.827939 | 0.338216   | 24.300107 |
| O  | -4.362375 | -0.491289  | 26.697547 |
| Ti | -2.627828 | 0.139139   | 26.191172 |
| O  | -1.368036 | -1.263376  | 22.255133 |
| Ti | -0.007165 | -2.752001  | 22.870291 |
| O  | -0.303655 | -2.404829  | 24.656796 |
| O  | -1.423485 | -1.143053  | 26.949177 |
| Ti | -0.017234 | -2.540699  | 26.564849 |
| O  | 1.473151  | -4.265003  | 27.041836 |
| O  | 1.406675  | -4.413009  | 22.910618 |
| O  | 1.766631  | -1.805372  | 22.586788 |
| O  | 1.750522  | -1.747466  | 26.500172 |
| Ti | 3.235174  | -3.343529  | 26.715788 |
| O  | 3.376417  | -3.480974  | 24.868282 |
| Ti | 3.185035  | -3.539071  | 22.979486 |
| Ti | -7.181328 | -5.017189  | 22.955671 |
| Ti | -6.798309 | -4.882467  | 25.738233 |
| O  | -6.794004 | -3.143834  | 22.648134 |
| Ti | -5.003666 | -2.535203  | 22.559259 |
| O  | -4.445782 | -2.150224  | 24.332024 |
| O  | -6.571492 | -3.084468  | 26.235815 |
| Ti | -4.871492 | -2.213227  | 26.138847 |
| O  | -5.695279 | -5.274805  | 24.232483 |
| O  | -4.439557 | -0.747370  | 21.846778 |
| O  | -3.938320 | -4.080259  | 22.129900 |
| Ti | -2.733981 | -5.557700  | 22.802710 |
| O  | -8.284400 | -4.982345  | 24.519147 |
| O  | -2.792080 | -5.212276  | 24.606140 |
| O  | -3.882116 | -3.601322  | 26.969561 |
| Ti | -2.759046 | -5.193838  | 26.501978 |
| Ti | -5.573582 | -8.167218  | 22.784479 |
| O  | -7.156730 | -6.877253  | 22.215481 |
| O  | -3.991478 | -6.826915  | 26.362526 |
| O  | -4.354776 | -9.477055  | 26.734605 |
| O  | -6.183037 | -8.252380  | 24.637624 |
| Ti | -5.543145 | -7.910965  | 26.359381 |
| O  | -6.636645 | -6.254737  | 27.059776 |
| O  | -4.040470 | -7.029334  | 22.364812 |
| O  | -1.449554 | -10.544395 | 22.114861 |
| O  | -1.187930 | -9.935762  | 26.743962 |
| O  | -1.412701 | -6.925265  | 26.901940 |
| Ti | -2.522156 | -8.537413  | 26.382408 |
| O  | -2.398845 | -8.701387  | 24.558232 |

|    |           |            |           |
|----|-----------|------------|-----------|
| O  | -1.418366 | -7.212300  | 22.631478 |
| Ti | -2.529461 | -8.975402  | 22.667643 |
| O  | -4.405181 | -9.625950  | 22.760024 |
| O  | -1.107560 | -4.438334  | 22.404909 |
| O  | -1.052878 | -4.241487  | 26.532497 |
| O  | 1.667340  | -7.211955  | 27.092534 |
| Ti | 0.334099  | -5.883610  | 26.554427 |
| O  | 0.405901  | -6.124109  | 24.716965 |
| O  | 1.437354  | -7.685507  | 22.304623 |
| Ti | 0.312657  | -6.147283  | 22.825248 |
| O  | 4.489879  | -4.957377  | 22.547887 |
| Ti | 5.827869  | -6.333460  | 23.085567 |
| O  | 5.791647  | -6.029433  | 24.888306 |
| O  | 4.507091  | -4.734388  | 27.241639 |
| Ti | 5.868976  | -6.099771  | 26.813212 |
| O  | 7.296573  | -7.805050  | 27.125544 |
| O  | 7.257688  | -7.969170  | 22.955451 |
| O  | 7.612712  | -5.407369  | 22.674522 |
| O  | 7.641849  | -5.215555  | 26.766268 |
| O  | 13.445406 | -9.075451  | 26.969892 |
| Ti | 11.623444 | -9.921748  | 26.818712 |
| O  | 11.863870 | -10.557191 | 25.079339 |
| O  | 12.760253 | -9.747255  | 22.547022 |
| Ti | 11.152246 | -10.495163 | 23.340754 |
| O  | 10.492468 | -11.625131 | 26.965313 |
| O  | 10.370948 | -8.478944  | 27.066634 |
| Ti | 9.052521  | -6.898833  | 26.794668 |
| O  | 9.311240  | -7.069434  | 24.945760 |
| O  | 10.131984 | -8.826307  | 22.805780 |
| Ti | 9.028135  | -7.155783  | 23.092996 |
| Ti | 2.881532  | -8.933442  | 22.892554 |
| O  | 2.768226  | -8.571447  | 24.677146 |
| Ti | 2.910814  | -8.636267  | 26.598582 |
| Ti | 0.170781  | -11.731228 | 22.594887 |
| O  | 1.660718  | -10.283932 | 26.151452 |
| O  | 1.354000  | -12.917424 | 26.607626 |
| O  | -0.400102 | -11.814899 | 24.428153 |
| Ti | 0.099278  | -11.358375 | 26.186447 |
| O  | 1.649332  | -10.494261 | 22.413050 |
| Ti | 6.237132  | -13.959551 | 26.096696 |
| O  | 5.990614  | -14.819151 | 24.476241 |
| Ti | 6.466169  | -13.304480 | 23.307425 |
| O  | 6.737571  | -12.329451 | 25.086386 |
| O  | 4.960869  | -13.327765 | 22.016635 |
| O  | 4.501739  | -13.225510 | 26.679038 |
| O  | 4.244504  | -10.344358 | 26.945508 |
| Ti | 3.097814  | -11.880083 | 26.273693 |
| O  | 3.397493  | -12.215058 | 24.453809 |
| O  | 4.247016  | -10.508530 | 22.623768 |
| Ti | 3.195287  | -12.295160 | 22.579211 |
| O  | 1.457622  | -13.149052 | 22.516336 |
| O  | 4.552153  | -7.853485  | 22.517365 |

|    |           |            |           |
|----|-----------|------------|-----------|
| O  | 4.592152  | -7.675325  | 26.805957 |
| Ti | 8.637574  | -11.875992 | 26.013813 |
| O  | 9.276409  | -11.366913 | 24.246878 |
| O  | 10.666614 | -11.839345 | 22.060509 |
| Ti | 8.763156  | -11.893773 | 22.134228 |
| O  | 8.124543  | -13.697956 | 22.548689 |
| O  | 8.143681  | -13.858282 | 26.615115 |
| O  | 7.451500  | -10.617381 | 26.968648 |
| Ti | 6.000174  | -9.325548  | 26.618004 |
| O  | 5.894552  | -9.250530  | 24.778910 |
| O  | 6.923374  | -11.259419 | 22.822953 |
| Ti | 6.014770  | -9.570738  | 22.893603 |
| Ti | 1.250389  | 0.605352   | 29.371247 |
| O  | 1.436138  | -0.015905  | 31.176482 |
| O  | -0.006683 | -0.323370  | 33.643205 |
| Ti | 1.717477  | 0.124964   | 33.010324 |
| O  | 2.758961  | 1.735154   | 32.894027 |
| O  | 2.161081  | 2.278041   | 29.100745 |
| O  | 2.622791  | -0.655542  | 28.803410 |
| Ti | 4.330214  | -1.500281  | 29.532063 |
| O  | 4.356758  | -1.761855  | 31.456020 |
| O  | 3.057020  | -0.820357  | 33.944379 |
| Ti | 4.444278  | -1.915448  | 33.276394 |
| O  | 5.779164  | -3.459139  | 33.745991 |
| O  | 5.630065  | -3.193211  | 29.290389 |
| Ti | 4.065771  | 2.293060   | 29.070792 |
| O  | 4.299132  | 3.269998   | 30.705428 |
| Ti | 4.342252  | 1.802210   | 31.893470 |
| O  | 4.347384  | 0.609520   | 30.309807 |
| O  | 5.821752  | 1.641146   | 33.009889 |
| O  | 6.135182  | 2.438650   | 28.753338 |
| O  | 6.190339  | -0.616811  | 29.005257 |
| Ti | 7.403325  | 1.019409   | 29.224836 |
| O  | 7.577044  | 0.985729   | 31.060049 |
| O  | 6.278279  | -0.943771  | 33.569036 |
| Ti | 7.424693  | 0.559014   | 32.914938 |
| O  | 9.138333  | 1.218046   | 33.525363 |
| O  | 8.779482  | -1.156705  | 32.557899 |
| O  | 8.768372  | -0.811732  | 29.145180 |
| O  | 9.154743  | 1.889485   | 28.623279 |
| O  | 10.753662 | 0.609718   | 30.827649 |
| Ti | 10.310548 | 0.256237   | 29.007090 |
| Ti | 10.281284 | 0.013179   | 32.549577 |
| Ti | 7.442613  | -2.645811  | 33.048259 |
| O  | 7.362627  | -2.894401  | 31.223587 |
| Ti | 7.473689  | -2.440487  | 29.375325 |
| O  | -0.602472 | 0.302948   | 29.149810 |
| O  | 8.929953  | -3.658796  | 28.897662 |
| Ti | 10.212522 | -5.141584  | 29.477377 |
| O  | 9.630900  | -4.771030  | 31.307918 |
| O  | 8.780512  | -3.527027  | 34.035601 |
| Ti | 9.888842  | -4.742614  | 33.132634 |

|    |           |           |           |
|----|-----------|-----------|-----------|
| O  | 11.259683 | -6.320957 | 33.634074 |
| O  | 11.520154 | -6.871819 | 28.970859 |
| O  | 11.804891 | -0.869997 | 33.204381 |
| O  | 11.901430 | -0.801047 | 28.500075 |
| O  | 11.809287 | -3.918413 | 28.754118 |
| Ti | 13.076836 | -2.327371 | 28.843772 |
| O  | 12.972082 | -2.100108 | 30.711569 |
| O  | 11.718719 | -3.726476 | 33.223490 |
| Ti | 12.934047 | -2.292154 | 32.586790 |
| O  | 14.855564 | -1.822333 | 32.842422 |
| O  | 14.163177 | -4.222622 | 32.327405 |
| O  | 14.360209 | -4.061716 | 28.926443 |
| O  | 14.911019 | -1.581638 | 28.077235 |
| O  | 16.501933 | -2.698790 | 30.177797 |
| Ti | 15.988151 | -3.220160 | 28.430656 |
| O  | 16.831713 | -4.917783 | 27.791281 |
| Ti | 15.726464 | -3.172170 | 31.860663 |
| O  | 16.942406 | -4.550471 | 32.297394 |
| Ti | 16.621469 | -6.186761 | 31.373729 |
| Ti | 16.347084 | -6.773019 | 28.527889 |
| O  | 16.488771 | -7.744423 | 32.405593 |
| Ti | 14.752031 | -8.516649 | 32.338150 |
| O  | 14.310693 | -8.958973 | 30.585927 |
| O  | 16.484563 | -8.700606 | 28.469706 |
| Ti | 14.710863 | -9.293824 | 28.686273 |
| O  | 15.088794 | -6.010685 | 30.243266 |
| O  | 13.769688 | -7.043616 | 32.932837 |
| Ti | 12.715515 | -5.530910 | 32.570973 |
| O  | 17.706267 | -6.545664 | 29.922608 |
| O  | 12.057821 | -5.418260 | 30.820887 |
| O  | 14.219444 | -7.284583 | 28.409961 |
| Ti | 13.188743 | -5.723370 | 29.162658 |
| Ti | -1.326633 | -1.466657 | 29.284568 |
| O  | -1.088694 | -1.746577 | 31.188983 |
| O  | -2.627164 | -2.600599 | 33.579597 |
| Ti | -0.916002 | -1.903674 | 33.031423 |
| O  | 0.016495  | -2.780820 | 28.765638 |
| Ti | 1.394094  | -4.177704 | 29.321174 |
| O  | 1.419822  | -4.190847 | 31.223585 |
| O  | 0.268995  | -3.184550 | 33.680199 |
| Ti | 1.560789  | -4.425404 | 33.062481 |
| O  | 2.939164  | -6.111366 | 33.398287 |
| O  | 2.794816  | -5.873515 | 29.321602 |
| O  | 3.094992  | -3.180250 | 29.051980 |
| O  | 3.219923  | -3.511768 | 33.622955 |
| Ti | 4.621909  | -5.058729 | 33.178008 |
| O  | 4.719262  | -5.042544 | 31.345835 |
| Ti | 4.564879  | -4.925260 | 29.425465 |
| Ti | -5.885109 | -6.442018 | 29.191709 |
| Ti | -5.399503 | -6.638730 | 31.965561 |
| O  | -5.544943 | -4.583866 | 28.925998 |
| Ti | -3.804706 | -3.831836 | 29.195875 |

|    |           |            |           |
|----|-----------|------------|-----------|
| O  | -3.424387 | -3.901484  | 31.072670 |
| O  | -5.080970 | -5.116536  | 32.978094 |
| Ti | -3.373560 | -4.189153  | 32.899523 |
| O  | -4.323832 | -6.801252  | 30.381065 |
| O  | -3.104490 | -2.055276  | 29.032714 |
| O  | -2.673203 | -5.324188  | 28.633038 |
| Ti | -1.501917 | -6.823865  | 29.274217 |
| O  | -6.914960 | -6.496783  | 30.791098 |
| O  | -1.148285 | -6.122347  | 31.019858 |
| O  | -2.400756 | -5.602549  | 33.675043 |
| Ti | -1.201970 | -6.716984  | 32.769619 |
| Ti | -4.236646 | -9.575390  | 28.852998 |
| O  | -5.865543 | -8.296868  | 28.400625 |
| O  | -2.360861 | -8.237536  | 32.107516 |
| O  | -2.778455 | -10.621113 | 33.146555 |
| O  | -4.703861 | -9.959300  | 30.664790 |
| Ti | -3.864057 | -9.374849  | 32.224973 |
| O  | -5.199948 | -8.225100  | 32.952161 |
| O  | -2.762866 | -8.331832  | 28.723086 |
| O  | -0.201562 | -11.851280 | 28.260789 |
| O  | 0.490682  | -11.245532 | 32.996810 |
| O  | -0.119865 | -8.481234  | 33.400531 |
| Ti | -0.979428 | -10.070857 | 32.621765 |
| O  | -0.948362 | -10.283755 | 30.773409 |
| O  | -0.214072 | -8.469460  | 29.065845 |
| Ti | -1.216699 | -10.283701 | 28.892624 |
| O  | -3.026221 | -11.008443 | 28.746313 |
| O  | 0.208045  | -5.791085  | 28.823529 |
| O  | 0.452054  | -6.013690  | 33.602155 |
| O  | 2.867668  | -9.071045  | 33.544160 |
| Ti | 1.725929  | -7.639945  | 33.020404 |
| O  | 1.564936  | -7.661520  | 31.185424 |
| O  | 2.609936  | -9.098066  | 28.698768 |
| Ti | 1.595955  | -7.498166  | 29.258926 |
| O  | 5.942233  | -6.276882  | 28.960653 |
| Ti | 7.180431  | -7.782588  | 29.505191 |
| O  | 7.157571  | -7.150923  | 31.318666 |
| O  | 5.848177  | -6.200048  | 34.022515 |
| Ti | 7.115703  | -7.281753  | 33.168224 |
| O  | 8.504644  | -8.906252  | 33.525343 |
| O  | 8.668435  | -9.361526  | 29.171769 |
| O  | 8.943697  | -6.741447  | 29.036922 |
| O  | 8.809193  | -6.373154  | 33.602980 |
| O  | 14.313545 | -9.924036  | 33.532975 |
| Ti | 12.630702 | -10.739461 | 33.204132 |
| O  | 13.146142 | -11.442044 | 31.516885 |
| O  | 14.485118 | -11.146676 | 28.758697 |
| Ti | 12.868630 | -11.489947 | 29.679506 |
| O  | 11.509547 | -12.238811 | 33.524790 |
| O  | 11.448660 | -9.346112  | 33.540637 |
| Ti | 10.198943 | -7.968157  | 33.059246 |
| O  | 10.386611 | -8.168619  | 31.234700 |



|    |           |            |           |
|----|-----------|------------|-----------|
| O  | 11.728335 | -9.999038  | 29.014564 |
| Ti | 10.394847 | -8.480486  | 29.317375 |
| Ti | 4.112958  | -10.201219 | 29.401160 |
| O  | 4.401863  | -8.825825  | 30.853550 |
| Ti | 4.331552  | -9.600302  | 32.511447 |
| Ti | 1.452344  | -13.020995 | 28.710498 |
| O  | 3.329739  | -11.116742 | 31.294351 |
| O  | 2.944699  | -13.212282 | 33.081217 |
| O  | 1.001369  | -13.004208 | 30.579299 |
| Ti | 1.810440  | -12.121494 | 32.002141 |
| O  | 2.926298  | -11.777293 | 28.633000 |
| Ti | 7.573314  | -14.246977 | 31.642325 |
| O  | 7.627434  | -15.470846 | 30.257425 |
| Ti | 7.937576  | -14.238981 | 28.757855 |
| O  | 7.488526  | -12.787844 | 30.419946 |
| O  | 6.083577  | -14.615451 | 28.076147 |
| O  | 6.172460  | -14.150971 | 32.909267 |
| O  | 5.485980  | -11.353948 | 32.887297 |
| Ti | 4.703160  | -13.066091 | 32.380451 |
| O  | 4.555908  | -13.790666 | 30.659129 |
| O  | 5.459592  | -11.802646 | 29.095206 |
| Ti | 4.419352  | -13.596291 | 28.779526 |
| O  | 2.672865  | -14.462821 | 28.650349 |
| O  | 5.881057  | -9.264861  | 28.829928 |
| O  | 5.904422  | -8.903151  | 33.488238 |
| Ti | 10.092936 | -12.568718 | 32.312871 |
| O  | 10.626998 | -12.164160 | 30.522229 |
| O  | 12.454781 | -13.000923 | 28.632703 |
| Ti | 10.573802 | -12.892036 | 28.636024 |
| O  | 9.846235  | -14.606816 | 28.685931 |
| O  | 9.317821  | -14.272362 | 32.384821 |
| O  | 8.649761  | -11.607010 | 33.063559 |
| Ti | 7.306663  | -10.329798 | 32.778406 |
| O  | 7.197828  | -10.005123 | 30.984605 |
| O  | 8.630272  | -12.223436 | 28.401075 |
| Ti | 7.294577  | -10.959261 | 29.195141 |

anatase-like 3-D (1,2,0)-mer

|    |           |           |           |
|----|-----------|-----------|-----------|
| O  | 1.109821  | 0.619534  | 2.047939  |
| O  | 1.092370  | 0.465958  | -2.556499 |
| O  | 2.877781  | 4.129652  | 1.890554  |
| O  | 2.886340  | 3.794372  | -1.621024 |
| O  | 4.167374  | 6.142717  | -0.110909 |
| Ti | 3.811877  | 5.430703  | -1.794806 |
| Ti | 3.727988  | 5.862383  | 1.724553  |
| Ti | 2.227355  | 2.226521  | 1.590533  |
| O  | 2.365325  | 1.580341  | -0.168399 |
| Ti | 2.316350  | 1.930063  | -2.006948 |
| O  | -2.240577 | -6.412708 | 2.123934  |
| O  | 0.616723  | -5.747279 | -2.616773 |
| O  | 0.656086  | -5.559839 | 2.168567  |
| O  | -0.609700 | -2.909947 | 2.031236  |

|    |           |           |           |
|----|-----------|-----------|-----------|
| Ti | -1.074767 | -4.842511 | 1.641193  |
| O  | -0.884187 | -4.944529 | -0.210940 |
| O  | -0.687536 | -3.025216 | -2.581628 |
| Ti | -1.029981 | -4.919269 | -2.089080 |
| O  | -2.408316 | -6.208726 | -2.561124 |
| O  | 2.197302  | -2.005669 | 2.209829  |
| Ti | 0.520497  | -1.261814 | 1.565628  |
| O  | 0.601942  | -1.518550 | -0.314085 |
| O  | 2.137260  | -2.074706 | -2.968613 |
| Ti | 0.549872  | -1.447806 | -2.187086 |
| O  | 3.887813  | 1.522016  | -2.945093 |
| Ti | 5.472542  | 0.868941  | -2.176356 |
| O  | 5.463242  | 0.928412  | -0.326992 |
| O  | 4.005320  | 1.654417  | 2.207564  |
| Ti | 5.664907  | 0.835656  | 1.591615  |
| O  | 7.595049  | -0.211365 | 2.063886  |
| O  | 7.286751  | -0.156307 | -2.643762 |
| O  | 5.658258  | 5.504287  | 2.273951  |
| O  | 5.433132  | 5.077630  | -2.688995 |
| O  | 6.779182  | 2.379128  | -2.584062 |
| Ti | 7.036436  | 4.270540  | -2.075626 |
| O  | 6.856742  | 4.327773  | -0.224092 |
| O  | 6.911867  | 2.416479  | 1.646244  |
| Ti | 7.196560  | 4.460997  | 1.631774  |
| O  | 8.524956  | 5.853185  | 1.721672  |
| O  | 9.332950  | 3.273382  | 1.887327  |
| O  | 9.083397  | 3.093170  | -1.591587 |
| O  | 8.502999  | 5.450409  | -2.582623 |
| O  | 10.490432 | 5.569624  | -0.131017 |
| Ti | 10.007972 | 4.731128  | -1.717682 |
| O  | 11.723146 | 4.234400  | -2.404821 |
| Ti | 10.199004 | 5.003496  | 1.662376  |
| O  | 12.191110 | 4.581501  | 2.152360  |
| Ti | 13.062309 | 2.948547  | 1.372243  |
| Ti | 12.571703 | 2.917481  | -1.390570 |
| O  | 13.383418 | 1.140053  | 1.814541  |
| Ti | 12.109898 | -0.281864 | 1.637716  |
| O  | 11.719227 | -0.310723 | -0.241515 |
| O  | 12.822522 | 1.326996  | -2.322584 |
| Ti | 11.591881 | -0.126653 | -2.078310 |
| O  | 11.512320 | 2.663958  | 0.183081  |
| O  | 12.138836 | -2.164554 | 1.857281  |
| O  | 10.430273 | 0.511705  | 2.218746  |
| Ti | 8.748922  | 1.360336  | 1.575777  |
| O  | 14.024918 | 3.363200  | -0.202531 |
| O  | 8.703630  | 0.725810  | -0.196460 |
| O  | 10.078539 | 0.647831  | -2.865657 |
| Ti | 8.537141  | 1.228449  | -1.977949 |
| Ti | 3.723431  | -2.481058 | -2.050106 |
| O  | 3.681065  | -2.265714 | -0.216191 |
| Ti | 3.942454  | -2.637399 | 1.630179  |
| Ti | 2.302592  | -6.062893 | -1.859272 |

|    |            |           |           |
|----|------------|-----------|-----------|
| O  | 3.369516   | -4.633747 | 1.567577  |
| O  | 4.133069   | -7.233251 | 2.086301  |
| O  | 2.088270   | -6.806759 | -0.140400 |
| Ti | 2.408531   | -6.267601 | 1.642363  |
| O  | 3.171758   | -4.388697 | -1.792963 |
| Ti | 8.877919   | -6.122818 | 1.506139  |
| O  | 9.198892   | -7.122838 | -0.040643 |
| Ti | 8.601404   | -5.739085 | -1.272180 |
| O  | 8.313521   | -4.674646 | 0.328060  |
| O  | 7.055388   | -5.973185 | -2.262577 |
| O  | 7.016986   | -6.486154 | 2.063405  |
| O  | 5.871614   | -3.718081 | 2.012698  |
| Ti | 5.311319   | -5.638041 | 1.632755  |
| O  | 5.243800   | -5.656048 | -0.217920 |
| O  | 5.564461   | -3.563135 | -2.612463 |
| Ti | 5.198627   | -5.432473 | -2.086432 |
| O  | 3.897023   | -6.703471 | -2.714263 |
| O  | 4.962756   | -1.053923 | -2.571840 |
| O  | 5.201505   | -1.128445 | 1.731266  |
| Ti | 10.650341  | -3.352273 | 1.734152  |
| O  | 10.496813  | -3.149662 | -0.147446 |
| O  | 11.480928  | -1.923234 | -2.685136 |
| Ti | 10.211460  | -3.139617 | -2.001968 |
| O  | 10.017191  | -5.032670 | -2.255251 |
| O  | 10.545389  | -5.302655 | 2.250457  |
| O  | 8.879401   | -2.779441 | 2.293643  |
| Ti | 7.122048   | -2.148810 | 1.625032  |
| O  | 6.944067   | -2.122594 | -0.274029 |
| O  | 8.535983   | -2.630793 | -2.655695 |
| Ti | 6.818330   | -2.041454 | -2.121049 |
| Ti | -10.308217 | 2.988531  | -2.331780 |
| O  | -10.739814 | 2.785440  | -0.498918 |
| O  | -12.597132 | 2.161272  | 1.746681  |
| Ti | -11.068318 | 3.185549  | 1.303998  |
| O  | -10.961924 | 4.998966  | 1.720667  |
| O  | -10.050453 | 4.866323  | -2.236407 |
| O  | -8.624269  | 2.495890  | -2.908229 |
| Ti | -6.917062  | 1.982173  | -2.201304 |
| O  | -7.073912  | 2.088574  | -0.404026 |
| O  | -9.402119  | 2.669885  | 2.085652  |
| Ti | -7.432832  | 2.511361  | 1.494797  |
| O  | -5.458904  | 1.446098  | 2.067353  |
| O  | -5.058950  | 1.001370  | -2.493352 |
| Ti | -8.623872  | 5.470375  | -1.174627 |
| O  | -9.208424  | 6.683471  | 0.161973  |
| Ti | -9.094108  | 5.515202  | 1.668707  |
| O  | -8.261391  | 4.226236  | 0.344445  |
| O  | -7.531296  | 6.395017  | 2.504203  |
| O  | -7.188547  | 5.841028  | -2.253262 |
| O  | -5.655990  | 3.541697  | -2.575331 |
| Ti | -5.316495  | 5.404710  | -1.908118 |
| O  | -5.553471  | 5.767579  | -0.080148 |

|    |            |           |           |
|----|------------|-----------|-----------|
| O  | -6.112559  | 4.007094  | 1.822060  |
| Ti | -5.644211  | 6.085261  | 1.789269  |
| O  | -4.401995  | 7.553230  | 1.804955  |
| O  | -3.627393  | 4.935656  | 1.995434  |
| O  | -3.373516  | 4.385524  | -1.452925 |
| O  | -4.031655  | 6.642088  | -2.590146 |
| O  | -2.222999  | 6.840183  | -0.044690 |
| Ti | -2.435545  | 6.030156  | -1.711378 |
| Ti | -2.720652  | 6.666143  | 1.794673  |
| Ti | -4.281980  | 3.012129  | 1.635226  |
| O  | -3.989369  | 2.256153  | -0.064995 |
| Ti | -3.900229  | 2.494224  | -1.923990 |
| Ti | -12.721323 | -2.927680 | -1.609758 |
| Ti | -13.009767 | -2.665286 | 1.165532  |
| O  | -12.967571 | -1.426662 | -2.676140 |
| Ti | -11.768970 | 0.079255  | -2.478257 |
| O  | -12.068025 | 0.378718  | -0.630948 |
| O  | -13.651565 | -0.973179 | 1.608152  |
| Ti | -12.380267 | 0.380826  | 1.210976  |
| O  | -11.597317 | -2.409584 | -0.117002 |
| O  | -11.609688 | 1.846052  | -3.126391 |
| O  | -10.188758 | -0.682457 | -3.038632 |
| Ti | -8.681805  | -1.299561 | -2.058612 |
| O  | -14.049069 | -3.326329 | -0.286602 |
| O  | -8.956667  | -0.947644 | -0.282580 |
| O  | -10.836738 | -0.241301 | 2.107960  |
| Ti | -9.067814  | -1.022606 | 1.631706  |
| Ti | -10.218999 | -4.815145 | -1.618058 |
| O  | -11.932893 | -4.426483 | -2.381474 |
| O  | -9.531645  | -3.034721 | 1.717221  |
| O  | -8.749635  | -5.591185 | 2.218201  |
| O  | -10.712513 | -5.361261 | 0.136387  |
| Ti | -10.477813 | -4.657713 | 1.855763  |
| O  | -12.287314 | -3.810624 | 2.482431  |
| O  | -9.327064  | -3.188975 | -1.960874 |
| O  | -5.694299  | -5.188278 | -2.515257 |
| O  | -5.757072  | -4.736246 | 2.192651  |
| O  | -7.135279  | -2.084543 | 2.055220  |
| Ti | -7.504132  | -4.032729 | 1.747802  |
| O  | -7.317339  | -4.245477 | -0.094153 |
| O  | -6.895914  | -2.476733 | -2.468758 |
| Ti | -7.299048  | -4.348683 | -1.973508 |
| O  | -8.719814  | -5.688845 | -2.292609 |
| O  | -7.416838  | 0.070194  | -2.710818 |
| O  | -7.848196  | 0.501482  | 1.602090  |
| O  | -4.293687  | -1.249199 | 2.200934  |
| Ti | -5.960537  | -0.458273 | 1.570696  |
| O  | -5.698601  | -0.889769 | -0.266353 |
| O  | -4.085246  | -1.537623 | -2.981570 |
| Ti | -5.634412  | -0.906366 | -2.139174 |
| O  | -2.339879  | 2.145189  | -2.890019 |
| Ti | -0.733729  | 1.479088  | -2.160474 |

|    |           |           |           |
|----|-----------|-----------|-----------|
| O  | -0.831251 | 1.582383  | -0.325209 |
| O  | -2.475023 | 2.491261  | 2.219272  |
| Ti | -0.825863 | 1.679394  | 1.613219  |
| O  | -0.782533 | 6.280839  | 2.286079  |
| O  | -0.836118 | 5.683667  | -2.598455 |
| O  | 0.537330  | 3.019296  | -2.586834 |
| Ti | 0.848242  | 4.914468  | -2.050915 |
| O  | 0.636930  | 5.043024  | -0.212489 |
| O  | 0.393671  | 3.254698  | 1.672766  |
| Ti | 0.791335  | 5.302101  | 1.665367  |
| O  | 2.078069  | 6.746549  | 1.741184  |
| O  | 2.245827  | 6.129043  | -2.607999 |
| Ti | -2.491713 | -1.912848 | -2.060873 |
| O  | -2.635809 | -1.622625 | -0.250777 |
| Ti | -2.553142 | -1.870787 | 1.643369  |
| Ti | -3.969899 | -5.468936 | -1.788845 |
| O  | -3.037691 | -3.877747 | 1.528158  |
| O  | -4.269066 | -6.139307 | -0.050643 |
| Ti | -3.998250 | -5.504825 | 1.697042  |
| O  | -3.087034 | -3.818509 | -1.824349 |
| O  | -1.271279 | -0.446730 | -2.597622 |
| O  | -1.349461 | -0.296067 | 1.686779  |
| O  | 2.801230  | -0.131967 | 8.613650  |
| O  | 2.879330  | -0.282384 | 4.329531  |
| O  | 4.617217  | 3.240406  | 7.841306  |
| O  | 4.567567  | 3.299472  | 4.487989  |
| O  | 5.798873  | 5.560836  | 6.067337  |
| Ti | 5.528011  | 4.926577  | 4.319304  |
| Ti | 5.499757  | 4.890822  | 7.805278  |
| Ti | 4.021526  | 1.334583  | 8.077244  |
| O  | 4.165705  | 1.044921  | 6.267099  |
| Ti | 4.082972  | 1.292656  | 4.372759  |
| O  | -0.714935 | -6.707144 | 8.624111  |
| O  | 2.312874  | -6.858893 | 3.730336  |
| O  | 2.366946  | -6.262093 | 8.614543  |
| O  | 0.992878  | -3.597991 | 8.602931  |
| Ti | 0.680989  | -5.493148 | 8.067124  |
| O  | 0.893585  | -5.621841 | 6.228478  |
| O  | 1.136186  | -3.833188 | 4.343385  |
| Ti | 0.738696  | -5.880510 | 4.350809  |
| O  | -0.547897 | -7.324930 | 4.274850  |
| O  | 3.870056  | -2.723436 | 8.906029  |
| Ti | 2.263911  | -2.057508 | 8.176533  |
| O  | 2.360997  | -2.161183 | 6.341305  |
| O  | 4.005285  | -3.069176 | 3.797027  |
| Ti | 2.355790  | -2.257842 | 4.402817  |
| O  | 5.823510  | 0.670985  | 3.815184  |
| Ti | 7.490089  | -0.120050 | 4.445662  |
| O  | 7.228162  | 0.311296  | 6.282758  |
| O  | 5.615202  | 0.959328  | 8.998019  |
| Ti | 7.163978  | 0.327988  | 8.155589  |
| O  | 8.946764  | -0.649572 | 8.727290  |

|    |           |           |          |
|----|-----------|-----------|----------|
| O  | 9.378153  | -1.079675 | 4.414237 |
| O  | 7.224203  | 4.610180  | 8.531793 |
| O  | 7.287051  | 4.158338  | 3.823469 |
| O  | 8.664657  | 1.506428  | 3.961138 |
| Ti | 9.034014  | 3.454705  | 4.268620 |
| O  | 8.846792  | 3.667176  | 6.110479 |
| O  | 8.425544  | 1.898440  | 8.485156 |
| Ti | 8.828807  | 3.770301  | 7.989790 |
| O  | 10.249304 | 5.111013  | 8.308735 |
| O  | 10.856851 | 2.611238  | 7.977766 |
| O  | 11.061308 | 2.456938  | 4.299074 |
| O  | 10.279396 | 5.013329  | 3.798149 |
| O  | 12.242157 | 4.783492  | 5.880050 |
| Ti | 12.007324 | 4.079922  | 4.160778 |
| O  | 13.817023 | 3.233372  | 3.534126 |
| Ti | 11.747406 | 4.237600  | 7.634008 |
| O  | 13.463088 | 3.849656  | 8.399217 |
| Ti | 14.251469 | 2.350993  | 7.626893 |
| Ti | 14.540018 | 2.089036  | 4.851738 |
| O  | 14.497745 | 0.849666  | 8.692988 |
| Ti | 13.299560 | -0.655932 | 8.493853 |
| O  | 13.598516 | -0.954391 | 6.647473 |
| O  | 15.182279 | 0.397246  | 4.408836 |
| Ti | 13.910904 | -0.956869 | 4.807506 |
| O  | 13.127561 | 1.833226  | 6.134122 |
| O  | 13.140757 | -2.423661 | 9.142981 |
| O  | 11.718615 | 0.104693  | 9.055042 |
| Ti | 10.211622 | 0.721998  | 8.074404 |
| O  | 15.579041 | 2.750564  | 6.303879 |
| O  | 10.486032 | 0.370330  | 6.298955 |
| O  | 12.367066 | -0.335379 | 3.908932 |
| Ti | 10.597273 | 0.444836  | 4.384603 |
| Ti | 5.811855  | -3.590261 | 4.381437 |
| O  | 5.519623  | -2.834039 | 6.081217 |
| Ti | 5.430455  | -3.072728 | 7.940126 |
| Ti | 4.251050  | -7.244809 | 4.221856 |
| O  | 4.903850  | -4.963862 | 7.468652 |
| O  | 5.562821  | -7.219999 | 8.606411 |
| O  | 3.753682  | -7.419392 | 6.058919 |
| Ti | 3.966615  | -6.608559 | 7.728242 |
| O  | 5.157237  | -5.514084 | 4.021055 |
| Ti | 10.155746 | -6.047809 | 7.190413 |
| O  | 10.741138 | -7.260573 | 5.853966 |
| Ti | 10.626110 | -6.092516 | 4.347138 |
| O  | 9.792269  | -4.804117 | 5.671399 |
| O  | 9.062443  | -6.971577 | 3.512696 |
| O  | 8.719806  | -6.418854 | 8.268198 |
| O  | 7.186429  | -4.119869 | 8.591471 |
| Ti | 6.847337  | -5.982768 | 7.924521 |
| O  | 7.083369  | -6.345720 | 6.095879 |
| O  | 7.642530  | -4.585111 | 4.193908 |
| Ti | 7.174732  | -6.663391 | 4.226890 |

|    |            |           |          |
|----|------------|-----------|----------|
| O  | 5.932718   | -8.131463 | 4.210782 |
| O  | 6.989014   | -2.024513 | 3.948933 |
| O  | 6.589307   | -1.579382 | 8.510036 |
| Ti | 11.839374  | -3.565575 | 8.346725 |
| O  | 12.270345  | -3.363710 | 6.514316 |
| O  | 14.128117  | -2.737758 | 4.269374 |
| Ti | 12.599410  | -3.761967 | 4.711991 |
| O  | 12.493826  | -5.575466 | 4.294781 |
| O  | 11.582124  | -5.443351 | 8.252347 |
| O  | 10.154937  | -3.073841 | 8.923618 |
| Ti | 8.447503   | -2.561049 | 8.217391 |
| O  | 8.603837   | -2.666705 | 6.420177 |
| O  | 10.932171  | -3.247773 | 3.930707 |
| Ti | 8.962882   | -3.090294 | 4.521331 |
| Ti | -9.119220  | 2.774769  | 4.282343 |
| O  | -8.964696  | 2.572304  | 6.164544 |
| O  | -9.949606  | 1.345414  | 8.702275 |
| Ti | -8.679758  | 2.561366  | 8.017249 |
| O  | -8.485401  | 4.454270  | 8.272385 |
| O  | -9.014123  | 4.725412  | 3.765128 |
| O  | -7.348734  | 2.201594  | 3.722333 |
| Ti | -5.591899  | 1.570201  | 4.391421 |
| O  | -5.413976  | 1.544195  | 6.290299 |
| O  | -7.004688  | 2.052344  | 8.673202 |
| Ti | -5.287664  | 1.463969  | 8.137362 |
| O  | -3.432302  | 0.474938  | 8.587800 |
| O  | -3.671115  | 0.549880  | 4.285041 |
| Ti | -7.346972  | 5.546706  | 4.510515 |
| O  | -7.668318  | 6.545209  | 6.057699 |
| Ti | -7.070897  | 5.161023  | 7.288712 |
| O  | -6.783062  | 4.097124  | 5.688135 |
| O  | -5.524724  | 5.395419  | 8.279272 |
| O  | -5.486227  | 5.908794  | 3.953006 |
| O  | -4.341600  | 3.139579  | 4.003590 |
| Ti | -3.781345  | 5.059504  | 4.383661 |
| O  | -3.713481  | 5.077121  | 6.234395 |
| O  | -4.033706  | 2.984595  | 8.628512 |
| Ti | -3.668243  | 4.854014  | 8.102898 |
| O  | -2.366811  | 6.125312  | 8.730615 |
| O  | -1.642357  | 3.810218  | 7.810141 |
| O  | -1.839437  | 4.055354  | 4.448798 |
| O  | -2.602908  | 6.654824  | 3.930139 |
| O  | -0.557988  | 6.228246  | 6.156318 |
| Ti | -0.878181  | 5.689234  | 4.374205 |
| Ti | -0.771945  | 5.484494  | 7.876534 |
| Ti | -2.193158  | 1.902908  | 8.066310 |
| O  | -2.150935  | 1.687752  | 6.232305 |
| Ti | -2.412365  | 2.059138  | 4.385998 |
| Ti | -11.532219 | -3.525660 | 4.644085 |
| Ti | -11.041576 | -3.495249 | 7.406831 |
| O  | -11.853066 | -1.717153 | 4.201853 |
| Ti | -10.579457 | -0.294997 | 4.379003 |

|    |            |           |          |
|----|------------|-----------|----------|
| O  | -10.188795 | -0.267105 | 6.258886 |
| O  | -11.292019 | -1.905057 | 8.339468 |
| Ti | -10.061179 | -0.451460 | 8.094279 |
| O  | -9.982000  | -3.241595 | 5.833330 |
| O  | -10.607744 | 1.587671  | 4.160199 |
| O  | -8.900382  | -1.089351 | 3.797595 |
| Ti | -7.219486  | -1.938630 | 4.440783 |
| O  | -12.494817 | -3.940287 | 6.218695 |
| O  | -7.174021  | -1.303316 | 6.212490 |
| O  | -8.547942  | -1.226636 | 8.882499 |
| Ti | -7.007113  | -1.806889 | 7.994014 |
| Ti | -8.669340  | -5.581775 | 4.353882 |
| O  | -10.661308 | -5.159118 | 3.864009 |
| O  | -7.553668  | -3.671900 | 7.607184 |
| O  | -6.972879  | -6.028706 | 8.599228 |
| O  | -8.960287  | -6.148092 | 6.147764 |
| Ti | -8.477816  | -5.309655 | 7.733459 |
| O  | -10.193141 | -4.813417 | 8.420843 |
| O  | -7.803239  | -3.851603 | 4.129075 |
| O  | -4.128105  | -6.082220 | 3.742322 |
| O  | -3.902748  | -5.655597 | 8.704779 |
| O  | -5.244645  | -2.957415 | 8.600034 |
| Ti | -5.506171  | -4.849225 | 8.091521 |
| O  | -5.326689  | -4.906707 | 6.240647 |
| O  | -5.382281  | -2.994786 | 4.370161 |
| Ti | -5.666897  | -5.039351 | 4.384290 |
| O  | -6.995050  | -6.431383 | 4.294187 |
| O  | -6.065103  | -0.367315 | 3.952578 |
| O  | -5.756501  | -0.427490 | 8.659799 |
| O  | -2.355487  | -2.101044 | 8.960872 |
| Ti | -3.942556  | -1.447515 | 8.192277 |
| O  | -3.933162  | -1.507046 | 6.343004 |
| O  | -2.475336  | -2.232740 | 3.808618 |
| Ti | -4.135169  | -1.414138 | 4.424385 |
| O  | -0.667340  | 1.427230  | 3.806358 |
| Ti | 1.009440   | 0.683399  | 4.450568 |
| O  | 0.927779   | 0.939824  | 6.330277 |
| O  | -0.606965  | 1.496197  | 8.985185 |
| Ti | 0.980071   | 0.869333  | 8.203271 |
| O  | 0.913885   | 5.169136  | 8.633548 |
| O  | 0.874008   | 4.981583  | 3.847601 |
| O  | 2.139475   | 2.331355  | 3.984920 |
| Ti | 2.604631   | 4.263979  | 4.375011 |
| O  | 2.414195   | 4.366047  | 6.227145 |
| O  | 2.217420   | 2.446629  | 8.597890 |
| Ti | 2.559200   | 4.340726  | 8.105236 |
| O  | 3.938405   | 5.630741  | 8.577234 |
| O  | 3.770644   | 5.834270  | 3.892247 |
| Ti | -0.697487  | -2.805053 | 4.425593 |
| O  | -0.835395  | -2.158087 | 6.184616 |
| Ti | -0.786378  | -2.508622 | 8.022921 |
| Ti | -2.198170  | -6.440825 | 4.291794 |



|    |           |           |          |
|----|-----------|-----------|----------|
| O  | -1.355897 | -4.372679 | 7.636295 |
| O  | -2.637384 | -6.721834 | 6.125962 |
| Ti | -2.281283 | -6.009017 | 7.811176 |
| O  | -1.346559 | -4.708060 | 4.125744 |
| O  | 0.420138  | -1.198072 | 3.968051 |
| O  | 0.437797  | -1.044835 | 8.572942 |

anatase-like 3-D (1,2,1)-mer

|    |           |           |           |
|----|-----------|-----------|-----------|
| O  | 1.025804  | 0.658446  | 1.861788  |
| O  | 1.038923  | 0.496059  | -2.718021 |
| O  | 2.791155  | 4.202738  | 1.771004  |
| O  | 2.799050  | 3.826094  | -1.640764 |
| O  | 4.092091  | 6.229106  | -0.206237 |
| Ti | 3.734046  | 5.456888  | -1.865587 |
| Ti | 3.670171  | 5.936990  | 1.631072  |
| Ti | 2.174883  | 2.288781  | 1.425184  |
| O  | 2.293421  | 1.541626  | -0.308624 |
| Ti | 2.254599  | 1.965133  | -2.122713 |
| O  | -2.345026 | -6.428866 | 2.027553  |
| O  | 0.593411  | -5.702579 | -2.723638 |
| O  | 0.624804  | -5.629518 | 1.973669  |
| O  | -0.703515 | -2.896628 | 1.831845  |
| Ti | -1.129598 | -4.856642 | 1.538712  |
| O  | -0.940351 | -4.955048 | -0.318034 |
| O  | -0.737059 | -3.014783 | -2.733756 |
| Ti | -1.065863 | -4.895893 | -2.192671 |
| O  | -2.431103 | -6.203844 | -2.675400 |
| O  | 2.151471  | -2.037047 | 1.948769  |
| Ti | 0.447464  | -1.243330 | 1.390194  |
| O  | 0.535608  | -1.514376 | -0.489935 |
| O  | 2.085561  | -2.068817 | -3.143608 |
| Ti | 0.507703  | -1.420392 | -2.355213 |
| O  | 3.816937  | 1.615034  | -3.096396 |
| Ti | 5.413902  | 0.935504  | -2.364312 |
| O  | 5.438363  | 0.976576  | -0.519828 |
| O  | 4.002035  | 1.726760  | 1.963599  |
| Ti | 5.680280  | 0.869303  | 1.400585  |
| O  | 7.599806  | -0.187540 | 1.831573  |
| O  | 7.229819  | -0.058280 | -2.858209 |
| O  | 5.602772  | 5.559368  | 2.167140  |
| O  | 5.338910  | 5.112356  | -2.785210 |
| O  | 6.725851  | 2.457864  | -2.733677 |
| Ti | 6.960356  | 4.332984  | -2.165080 |
| O  | 6.767589  | 4.395506  | -0.322365 |
| O  | 6.925014  | 2.456101  | 1.484951  |
| Ti | 7.153531  | 4.517130  | 1.537377  |
| O  | 8.502196  | 5.888284  | 1.630669  |
| O  | 9.328795  | 3.328345  | 1.756324  |
| O  | 9.004079  | 3.168639  | -1.668630 |
| O  | 8.421271  | 5.529303  | -2.663946 |
| O  | 10.449316 | 5.656059  | -0.225105 |
| Ti | 9.924515  | 4.809508  | -1.798758 |

|    |           |           |           |
|----|-----------|-----------|-----------|
| O  | 11.639607 | 4.331410  | -2.496039 |
| Ti | 10.197643 | 5.056966  | 1.565449  |
| O  | 12.195794 | 4.687807  | 2.077633  |
| Ti | 13.033912 | 3.044114  | 1.289932  |
| Ti | 12.496945 | 3.018986  | -1.476628 |
| O  | 13.414997 | 1.218541  | 1.634745  |
| Ti | 12.163115 | -0.206569 | 1.445064  |
| O  | 11.816061 | -0.255469 | -0.440911 |
| O  | 12.759845 | 1.464644  | -2.462656 |
| Ti | 11.564371 | -0.030183 | -2.264900 |
| O  | 11.456093 | 2.758074  | 0.115712  |
| O  | 12.248468 | -2.114598 | 1.658162  |
| O  | 10.485710 | 0.570850  | 2.009208  |
| Ti | 8.773173  | 1.405422  | 1.389566  |
| O  | 13.955710 | 3.481760  | -0.309398 |
| O  | 8.703050  | 0.739944  | -0.383876 |
| O  | 10.039898 | 0.771223  | -3.021216 |
| Ti | 8.482502  | 1.303472  | -2.134446 |
| Ti | 3.683256  | -2.421638 | -2.219408 |
| O  | 3.662358  | -2.157022 | -0.396234 |
| Ti | 3.960771  | -2.602438 | 1.433970  |
| Ti | 2.272283  | -6.007605 | -1.957125 |
| O  | 3.440871  | -4.608582 | 1.469375  |
| O  | 4.185045  | -7.210656 | 1.987727  |
| O  | 2.107837  | -6.774996 | -0.244409 |
| Ti | 2.455612  | -6.221046 | 1.534352  |
| O  | 3.154441  | -4.336989 | -1.857826 |
| Ti | 8.989706  | -5.960459 | 1.366621  |
| O  | 9.149448  | -6.964712 | -0.223070 |
| Ti | 8.474838  | -5.582843 | -1.385940 |
| O  | 8.100387  | -4.557475 | 0.212636  |
| O  | 6.983486  | -5.886993 | -2.457706 |
| O  | 7.139278  | -6.508933 | 1.971398  |
| O  | 5.895953  | -3.717329 | 1.806364  |
| Ti | 5.416792  | -5.669504 | 1.473537  |
| O  | 5.227389  | -5.707164 | -0.366185 |
| O  | 5.483981  | -3.504805 | -2.804051 |
| Ti | 5.139257  | -5.374341 | -2.234188 |
| O  | 3.834972  | -6.644714 | -2.863985 |
| O  | 4.897244  | -0.979879 | -2.797164 |
| O  | 5.248267  | -1.111177 | 1.507183  |
| Ti | 10.731968 | -3.203007 | 1.405582  |
| O  | 10.319561 | -2.770187 | -0.425954 |
| O  | 11.417387 | -1.791756 | -2.952003 |
| Ti | 10.095047 | -2.962298 | -2.256375 |
| O  | 9.895187  | -4.858905 | -2.362434 |
| O  | 10.675665 | -5.091969 | 1.554307  |
| O  | 8.973183  | -2.594537 | 2.000693  |
| Ti | 7.153536  | -2.161610 | 1.333840  |
| O  | 6.909238  | -2.091114 | -0.560290 |
| O  | 8.443020  | -2.529184 | -3.035433 |
| Ti | 6.760956  | -1.964283 | -2.397672 |

|    |            |           |           |
|----|------------|-----------|-----------|
| Ti | -10.291448 | 3.020458  | -2.459548 |
| O  | -10.730550 | 2.707274  | -0.624341 |
| O  | -12.694759 | 2.463897  | 1.678726  |
| Ti | -11.144409 | 3.353147  | 1.090435  |
| O  | -11.072473 | 5.185618  | 1.277627  |
| O  | -10.074161 | 4.878197  | -2.422954 |
| O  | -8.639932  | 2.471355  | -3.073466 |
| Ti | -6.938957  | 1.916683  | -2.381588 |
| O  | -7.139782  | 1.955823  | -0.585378 |
| O  | -9.438142  | 3.101148  | 1.991252  |
| Ti | -7.564120  | 2.464501  | 1.288679  |
| O  | -5.596798  | 1.407213  | 1.836006  |
| O  | -5.066665  | 0.943580  | -2.627383 |
| Ti | -8.586645  | 5.474741  | -1.398575 |
| O  | -9.126317  | 6.686707  | -0.086721 |
| Ti | -9.137424  | 5.483838  | 1.446697  |
| O  | -8.289646  | 4.182136  | 0.054404  |
| O  | -7.633887  | 6.513985  | 2.292874  |
| O  | -7.187273  | 5.807617  | -2.556328 |
| O  | -5.689433  | 3.488673  | -2.690352 |
| Ti | -5.364128  | 5.383414  | -2.059677 |
| O  | -5.648216  | 5.773003  | -0.255538 |
| O  | -6.221795  | 3.994210  | 1.539888  |
| Ti | -5.769100  | 6.063993  | 1.634985  |
| O  | -4.532333  | 7.534266  | 1.710728  |
| O  | -3.756320  | 4.936891  | 1.880167  |
| O  | -3.433670  | 4.360736  | -1.567541 |
| O  | -4.067566  | 6.640698  | -2.701991 |
| O  | -2.313147  | 6.821432  | -0.120794 |
| Ti | -2.503021  | 6.018473  | -1.796960 |
| Ti | -2.840080  | 6.656413  | 1.712339  |
| Ti | -4.408302  | 3.008883  | 1.463953  |
| O  | -4.018135  | 2.183596  | -0.197683 |
| Ti | -3.934600  | 2.459254  | -2.043525 |
| Ti | -12.477023 | -2.657150 | -1.203581 |
| Ti | -12.713694 | -2.250315 | 1.639874  |
| O  | -12.904215 | -1.380963 | -2.497174 |
| Ti | -11.846003 | 0.220123  | -2.572078 |
| O  | -12.437065 | 0.666091  | -0.805379 |
| O  | -13.736953 | -0.607218 | 1.706337  |
| Ti | -12.597387 | 0.698543  | 1.041251  |
| O  | -11.280884 | -1.952414 | 0.218801  |
| O  | -11.636062 | 1.947173  | -3.293847 |
| O  | -10.272082 | -0.599744 | -3.130687 |
| Ti | -8.699854  | -1.289866 | -2.321541 |
| O  | -13.718597 | -2.979277 | 0.155066  |
| O  | -8.896161  | -0.848572 | -0.562593 |
| O  | -10.968505 | 0.026755  | 1.829146  |
| Ti | -9.344905  | -1.129445 | 1.277833  |
| Ti | -10.179762 | -4.826007 | -1.608181 |
| O  | -11.922606 | -4.226947 | -2.053143 |
| O  | -9.631184  | -3.196165 | 1.543266  |

|    |            |           |           |
|----|------------|-----------|-----------|
| O  | -8.844684  | -5.718975 | 2.236446  |
| O  | -10.674745 | -5.535650 | 0.084266  |
| Ti | -10.572648 | -4.836745 | 1.821016  |
| O  | -12.291024 | -4.016582 | 2.433163  |
| O  | -9.336075  | -3.164001 | -1.965661 |
| O  | -5.700319  | -5.207982 | -2.622354 |
| O  | -5.902933  | -4.884554 | 2.059005  |
| O  | -7.320295  | -2.143939 | 1.810602  |
| Ti | -7.644284  | -4.128288 | 1.613107  |
| O  | -7.403242  | -4.353268 | -0.228606 |
| O  | -6.948965  | -2.527417 | -2.715451 |
| Ti | -7.311533  | -4.363562 | -2.119136 |
| O  | -8.753175  | -5.660029 | -2.485397 |
| O  | -7.401836  | 0.024202  | -3.029400 |
| O  | -8.073971  | 0.474733  | 1.451937  |
| O  | -4.449267  | -1.227517 | 1.960028  |
| Ti | -6.195163  | -0.482207 | 1.337547  |
| O  | -5.808911  | -0.980325 | -0.476424 |
| O  | -4.118910  | -1.614889 | -3.172155 |
| Ti | -5.666370  | -0.960950 | -2.339702 |
| O  | -2.386799  | 2.155528  | -3.057128 |
| Ti | -0.789039  | 1.491652  | -2.315697 |
| O  | -0.904239  | 1.594142  | -0.481395 |
| O  | -2.538914  | 2.600973  | 2.057433  |
| Ti | -0.906364  | 1.724092  | 1.458406  |
| O  | -0.897830  | 6.338823  | 2.237919  |
| O  | -0.906619  | 5.697117  | -2.698301 |
| O  | 0.484228   | 3.050270  | -2.695058 |
| Ti | 0.774324   | 4.940125  | -2.127270 |
| O  | 0.532724   | 5.099546  | -0.297001 |
| O  | 0.321033   | 3.295860  | 1.532455  |
| Ti | 0.692694   | 5.371843  | 1.586260  |
| O  | 1.994167   | 6.801351  | 1.652723  |
| O  | 2.173248   | 6.143277  | -2.700696 |
| Ti | -2.527994  | -1.912981 | -2.215962 |
| O  | -2.708930  | -1.567808 | -0.418282 |
| Ti | -2.660888  | -1.825530 | 1.474321  |
| Ti | -3.982284  | -5.476623 | -1.875553 |
| O  | -3.123840  | -3.862164 | 1.440761  |
| O  | -4.307382  | -6.149435 | -0.147509 |
| Ti | -4.068876  | -5.486817 | 1.600920  |
| O  | -3.106938  | -3.819498 | -1.879191 |
| O  | -1.321024  | -0.437622 | -2.765067 |
| O  | -1.424667  | -0.265917 | 1.537434  |
| O  | 2.697612   | 0.049877  | 8.284610  |
| O  | 2.853227   | -0.228170 | 4.044212  |
| O  | 4.438280   | 3.571627  | 8.147338  |
| O  | 4.499236   | 3.371800  | 4.298576  |
| O  | 5.789015   | 5.565670  | 6.000813  |
| Ti | 5.495665   | 4.986743  | 4.243236  |
| Ti | 5.315868   | 5.299488  | 7.843317  |
| Ti | 3.816296   | 1.657679  | 7.829562  |

|    |           |           |          |
|----|-----------|-----------|----------|
| O  | 4.012807  | 1.419806  | 6.025676 |
| Ti | 4.036015  | 1.350647  | 4.103320 |
| O  | -0.665531 | -7.059778 | 8.256618 |
| O  | 2.364263  | -6.789753 | 3.627112 |
| O  | 2.320637  | -6.166491 | 8.300066 |
| O  | 0.989449  | -3.525681 | 8.318879 |
| Ti | 0.522390  | -5.470092 | 7.845668 |
| O  | 0.803683  | -5.581487 | 6.030004 |
| O  | 1.131029  | -3.836393 | 4.044094 |
| Ti | 0.714584  | -5.861579 | 4.151518 |
| O  | -0.597611 | -7.317001 | 4.150372 |
| O  | 3.880975  | -2.569172 | 8.371349 |
| Ti | 2.105415  | -1.863214 | 7.851448 |
| O  | 2.287620  | -2.085198 | 6.025959 |
| O  | 4.086401  | -2.881930 | 3.617188 |
| Ti | 2.317381  | -2.230400 | 4.118598 |
| O  | 5.794489  | 0.702593  | 3.622571 |
| Ti | 7.517749  | -0.081254 | 4.153814 |
| O  | 7.335332  | 0.105284  | 5.992008 |
| O  | 5.604275  | 0.976397  | 8.396297 |
| Ti | 7.349847  | 0.256672  | 7.896179 |
| O  | 9.329362  | -0.770238 | 8.300616 |
| O  | 9.447794  | -1.002513 | 4.178823 |
| O  | 7.256040  | 4.848584  | 8.333312 |
| O  | 7.251724  | 4.218062  | 3.700078 |
| O  | 8.704168  | 1.539199  | 3.707685 |
| Ti | 9.023746  | 3.498319  | 4.101618 |
| O  | 8.798108  | 3.530191  | 5.922726 |
| O  | 8.556378  | 1.844295  | 7.958384 |
| Ti | 8.867410  | 3.880864  | 7.790721 |
| O  | 10.172888 | 5.351903  | 7.656026 |
| O  | 10.965889 | 2.785782  | 8.067936 |
| O  | 11.084787 | 2.534529  | 4.182948 |
| O  | 10.277337 | 5.073396  | 3.699107 |
| O  | 12.380538 | 4.800392  | 5.813167 |
| Ti | 12.025392 | 4.175505  | 4.110675 |
| O  | 13.770898 | 3.237914  | 3.447424 |
| Ti | 11.816381 | 4.496812  | 7.654389 |
| O  | 13.771843 | 4.034378  | 8.099644 |
| Ti | 14.695537 | 2.382909  | 7.501490 |
| Ti | 14.572042 | 2.056286  | 4.703132 |
| O  | 15.081896 | 0.650093  | 8.409723 |
| Ti | 13.752561 | -0.942124 | 8.048899 |
| O  | 14.223834 | -1.068498 | 6.196328 |
| O  | 15.190053 | 0.447012  | 4.007946 |
| Ti | 14.047196 | -1.061300 | 4.363914 |
| O  | 13.393306 | 1.787238  | 6.203266 |
| O  | 13.317324 | -2.739044 | 8.136891 |
| O  | 12.222363 | 0.115848  | 8.570344 |
| Ti | 10.455951 | 0.823864  | 7.874414 |
| O  | 15.815413 | 2.738953  | 6.019710 |
| O  | 10.739283 | 0.470346  | 6.089934 |

|    |            |           |          |
|----|------------|-----------|----------|
| O  | 12.404873  | -0.321020 | 3.726556 |
| Ti | 10.661768  | 0.528963  | 4.189269 |
| Ti | 5.862728   | -3.563131 | 4.142445 |
| O  | 5.692485   | -3.380674 | 5.950465 |
| Ti | 5.608966   | -3.259411 | 7.870859 |
| Ti | 4.310537   | -7.228842 | 4.116652 |
| O  | 5.089167   | -5.288075 | 7.588579 |
| O  | 5.835130   | -7.799604 | 8.187482 |
| O  | 3.817457   | -7.493811 | 5.954368 |
| Ti | 4.053375   | -6.890514 | 7.713458 |
| O  | 5.259449   | -5.503939 | 3.867953 |
| Ti | 10.640164  | -6.993936 | 7.676619 |
| O  | 10.808617  | -7.938635 | 6.053787 |
| Ti | 10.672922  | -6.442495 | 4.823511 |
| O  | 10.600125  | -5.368237 | 6.496502 |
| O  | 9.305709   | -6.645906 | 3.497270 |
| O  | 8.795002   | -6.930497 | 8.239039 |
| O  | 7.545088   | -4.311376 | 8.262692 |
| Ti | 6.999358   | -6.209986 | 7.744483 |
| O  | 7.493401   | -6.442951 | 5.946323 |
| O  | 7.795037   | -4.536217 | 3.949273 |
| Ti | 7.266442   | -6.557962 | 4.083916 |
| O  | 6.020755   | -8.048357 | 4.126943 |
| O  | 7.021797   | -2.007670 | 3.692348 |
| O  | 6.841951   | -1.737991 | 7.976483 |
| Ti | 12.120758  | -4.245202 | 7.858266 |
| O  | 12.832705  | -4.107326 | 6.040638 |
| O  | 14.021920  | -2.841945 | 3.736525 |
| Ti | 12.660906  | -4.079579 | 4.234856 |
| O  | 12.284626  | -5.981800 | 4.026833 |
| O  | 12.289489  | -6.214849 | 8.468204 |
| O  | 10.439518  | -3.557114 | 8.533708 |
| Ti | 8.760453   | -2.687848 | 7.889542 |
| O  | 8.972038   | -2.891558 | 6.058573 |
| O  | 10.892682  | -3.510360 | 3.734275 |
| Ti | 9.021376   | -2.979715 | 4.154917 |
| Ti | -9.059570  | 3.091446  | 4.174996 |
| O  | -9.774232  | 2.955185  | 5.991668 |
| O  | -10.960798 | 1.687299  | 8.296372 |
| Ti | -9.600379  | 2.926232  | 7.797277 |
| O  | -9.223083  | 4.827466  | 8.006448 |
| O  | -9.228251  | 5.060568  | 3.564133 |
| O  | -7.378729  | 2.402522  | 3.498358 |
| Ti | -5.700648  | 1.531313  | 4.142594 |
| O  | -5.913351  | 1.734925  | 5.973359 |
| O  | -7.832807  | 2.355070  | 8.297892 |
| Ti | -5.961643  | 1.824291  | 7.877078 |
| O  | -3.961998  | 0.851077  | 8.339741 |
| O  | -3.782663  | 0.580911  | 4.055720 |
| Ti | -7.578236  | 5.839741  | 4.356333 |
| O  | -7.746668  | 6.784132  | 5.979657 |
| Ti | -7.611422  | 5.287783  | 7.209228 |

|    |            |           |          |
|----|------------|-----------|----------|
| O  | -7.539696  | 4.213450  | 5.535998 |
| O  | -6.244580  | 5.490604  | 8.536108 |
| O  | -5.733806  | 5.775075  | 3.793280 |
| O  | -4.485432  | 3.154552  | 3.769681 |
| Ti | -3.938888  | 5.053118  | 4.288308 |
| O  | -4.433372  | 5.286456  | 6.086252 |
| O  | -4.735284  | 3.379326  | 8.082671 |
| Ti | -4.205911  | 5.401455  | 7.948625 |
| O  | -2.960328  | 6.891866  | 7.905358 |
| O  | -2.199393  | 4.347475  | 8.164692 |
| O  | -2.028936  | 4.130880  | 4.444089 |
| O  | -2.774444  | 6.642501  | 3.845026 |
| O  | -0.756968  | 6.336109  | 6.078458 |
| Ti | -0.993610  | 5.733433  | 4.319192 |
| Ti | -1.249008  | 6.072371  | 7.916118 |
| Ti | -2.803158  | 2.406935  | 7.889976 |
| O  | -2.633421  | 2.223785  | 6.081988 |
| Ti | -2.549400  | 2.102641  | 4.161540 |
| Ti | -11.635177 | -3.538938 | 4.532183 |
| Ti | -11.511138 | -3.212238 | 7.330382 |
| O  | -12.021978 | -1.805592 | 3.625192 |
| Ti | -10.691096 | -0.213760 | 3.984887 |
| O  | -11.163374 | -0.085869 | 5.837173 |
| O  | -12.129040 | -1.602681 | 8.024707 |
| Ti | -10.986820 | -0.093679 | 7.669404 |
| O  | -10.332447 | -2.943584 | 5.830019 |
| O  | -10.253305 | 1.582100  | 3.897090 |
| O  | -9.162438  | -1.273273 | 3.461944 |
| Ti | -7.396117  | -1.980781 | 4.158182 |
| O  | -12.754671 | -3.895220 | 6.014101 |
| O  | -7.680478  | -1.625362 | 5.942323 |
| O  | -9.344445  | -0.834450 | 8.306006 |
| Ti | -7.602027  | -1.685392 | 7.842619 |
| Ti | -8.756540  | -5.653636 | 4.378625 |
| O  | -10.711721 | -5.190543 | 3.933622 |
| O  | -8.024576  | -3.690929 | 7.849340 |
| O  | -7.216616  | -6.229937 | 8.333309 |
| O  | -9.320144  | -5.957696 | 6.219908 |
| Ti | -8.965030  | -5.332240 | 7.922050 |
| O  | -10.710288 | -4.394571 | 8.585782 |
| O  | -7.905679  | -3.942550 | 3.965162 |
| O  | -4.195857  | -6.004713 | 3.699359 |
| O  | -4.191008  | -5.374332 | 8.332102 |
| O  | -5.644573  | -2.695591 | 8.324792 |
| Ti | -5.962751  | -4.655032 | 7.930869 |
| O  | -5.737991  | -4.686850 | 6.109798 |
| O  | -5.497068  | -3.000938 | 4.074295 |
| Ti | -5.807669  | -5.037971 | 4.241806 |
| O  | -7.112912  | -6.508764 | 4.376635 |
| O  | -6.269952  | -0.386677 | 3.731643 |
| O  | -6.388173  | -0.154108 | 7.853057 |
| O  | -2.734576  | -1.858628 | 8.409592 |

|    |           |           |           |
|----|-----------|-----------|-----------|
| Ti | -4.457724 | -1.075286 | 7.878283  |
| O  | -4.276629 | -1.262078 | 6.040177  |
| O  | -2.544704 | -2.132548 | 3.635995  |
| Ti | -4.290539 | -1.413482 | 4.135869  |
| O  | -0.821078 | 1.412814  | 3.661231  |
| Ti | 0.954620  | 0.707158  | 4.181138  |
| O  | 0.771725  | 0.928818  | 6.006658  |
| O  | -1.026677 | 1.725959  | 8.415252  |
| Ti | 0.742234  | 1.074115  | 7.913620  |
| O  | 0.696316  | 5.633984  | 8.405848  |
| O  | 0.740097  | 5.010062  | 3.732322  |
| O  | 2.070501  | 2.369221  | 3.713697  |
| Ti | 2.538376  | 4.313688  | 4.186958  |
| O  | 2.256283  | 4.425124  | 6.002510  |
| O  | 1.928544  | 2.680227  | 7.988433  |
| Ti | 2.345455  | 4.705538  | 7.881134  |
| O  | 3.658041  | 6.160864  | 7.881975  |
| O  | 3.726333  | 5.903218  | 3.775752  |
| Ti | -0.756668 | -2.814014 | 4.202782  |
| O  | -0.953253 | -2.575850 | 6.006620  |
| Ti | -0.976161 | -2.506039 | 7.928975  |
| Ti | -2.255635 | -6.455686 | 4.189367  |
| O  | -1.438690 | -4.528191 | 7.733549  |
| O  | -2.728699 | -6.722523 | 6.031726  |
| Ti | -2.435273 | -6.143338 | 7.789164  |
| O  | -1.378402 | -4.727741 | 3.885367  |
| O  | 0.362127  | -1.205981 | 3.747757  |
| O  | 0.206343  | -0.928229 | 7.988079  |
| O  | 4.381556  | -0.719696 | 14.797556 |
| O  | 4.484270  | -0.890735 | 10.495274 |
| O  | 6.168040  | 2.663204  | 13.913086 |
| O  | 6.183729  | 2.705716  | 10.591746 |
| O  | 7.367517  | 4.992557  | 12.180295 |
| Ti | 7.129430  | 4.330305  | 10.431625 |
| Ti | 7.043128  | 4.320050  | 13.908718 |
| Ti | 5.588582  | 0.756212  | 14.248819 |
| O  | 5.768257  | 0.412582  | 12.450576 |
| Ti | 5.720508  | 0.669373  | 10.558042 |
| O  | 0.888288  | -7.299257 | 14.733238 |
| O  | 3.958791  | -7.495231 | 9.794703  |
| O  | 3.968686  | -6.853009 | 14.730024 |
| O  | 2.576360  | -4.207060 | 14.727194 |
| Ti | 2.286911  | -6.096707 | 14.159649 |
| O  | 2.528280  | -6.256527 | 12.329194 |
| O  | 2.738641  | -4.452384 | 10.499964 |
| Ti | 2.368043  | -6.528476 | 10.446098 |
| O  | 1.066561  | -7.957832 | 10.379456 |
| O  | 5.447758  | -3.312407 | 15.089141 |
| Ti | 3.849607  | -2.648061 | 14.347983 |
| O  | 3.963985  | -2.751062 | 12.513676 |
| O  | 5.598320  | -3.757889 | 9.975014  |
| Ti | 3.966093  | -2.880530 | 10.573872 |



|    |           |           |           |
|----|-----------|-----------|-----------|
| O  | 7.508579  | 0.070649  | 10.072021 |
| Ti | 9.254988  | -0.674030 | 10.694472 |
| O  | 8.869061  | -0.175351 | 12.508391 |
| O  | 7.179671  | 0.458105  | 15.204502 |
| Ti | 8.727157  | -0.195049 | 14.371643 |
| O  | 10.463021 | -1.179420 | 15.062015 |
| O  | 11.133411 | -1.630421 | 10.581014 |
| O  | 8.761333  | 4.051937  | 14.655442 |
| O  | 8.963101  | 3.728122  | 9.973629  |
| O  | 10.380373 | 0.987471  | 10.221556 |
| Ti | 10.704282 | 2.971552  | 10.419383 |
| O  | 10.463932 | 3.196234  | 12.261093 |
| O  | 10.010262 | 1.371063  | 14.747812 |
| Ti | 10.372128 | 3.207153  | 14.151360 |
| O  | 11.813596 | 4.504745  | 14.517219 |
| O  | 12.397610 | 2.008787  | 13.999890 |
| O  | 12.691876 | 2.040004  | 10.489534 |
| O  | 11.904970 | 4.562573  | 9.796561  |
| O  | 13.735575 | 4.379494  | 11.949400 |
| Ti | 13.632713 | 3.680484  | 10.211856 |
| O  | 15.352220 | 2.862247  | 9.600174  |
| Ti | 13.239099 | 3.670600  | 13.641749 |
| O  | 14.983690 | 3.075691  | 14.088475 |
| Ti | 15.539339 | 1.500983  | 13.237218 |
| Ti | 15.775503 | 1.096677  | 10.394555 |
| O  | 15.966459 | 0.226481  | 14.531148 |
| Ti | 14.908574 | -1.375139 | 14.606726 |
| O  | 15.498895 | -1.819807 | 12.839628 |
| O  | 16.797473 | -0.547151 | 10.326197 |
| Ti | 15.657939 | -1.852915 | 10.991267 |
| O  | 14.343069 | 0.797939  | 11.814335 |
| O  | 14.698562 | -3.100488 | 15.326899 |
| O  | 13.334195 | -0.555075 | 15.163634 |
| Ti | 11.761225 | 0.133619  | 14.354731 |
| O  | 16.780868 | 1.824541  | 11.879415 |
| O  | 11.957594 | -0.306475 | 12.595701 |
| O  | 14.027759 | -1.183665 | 10.205177 |
| Ti | 12.405079 | -0.026742 | 10.754830 |
| Ti | 7.467915  | -4.164696 | 10.568504 |
| O  | 7.078068  | -3.339193 | 12.229817 |
| Ti | 6.995747  | -3.615535 | 14.075926 |
| Ti | 5.901385  | -7.813478 | 10.320185 |
| O  | 6.495354  | -5.517320 | 13.598102 |
| O  | 7.129483  | -7.796683 | 14.734696 |
| O  | 5.374835  | -7.978895 | 12.153191 |
| Ti | 5.565178  | -7.175020 | 13.829099 |
| O  | 6.816965  | -6.093541 | 10.152311 |
| Ti | 11.649803 | -6.628905 | 13.431574 |
| O  | 12.190143 | -7.840610 | 12.119569 |
| Ti | 12.199477 | -6.638060 | 10.585975 |
| O  | 11.350177 | -5.337361 | 11.978519 |
| O  | 10.695544 | -7.668274 | 9.738909  |

|    |           |           |           |
|----|-----------|-----------|-----------|
| O  | 10.249584 | -6.963198 | 14.587864 |
| O  | 8.750345  | -4.644740 | 14.722341 |
| Ti | 8.426478  | -6.539699 | 14.091951 |
| O  | 8.709128  | -6.930366 | 12.287780 |
| O  | 9.281118  | -5.150133 | 10.492376 |
| Ti | 8.830080  | -7.220060 | 10.397424 |
| O  | 7.593693  | -8.690693 | 10.320703 |
| O  | 8.656303  | -2.563650 | 10.196223 |
| O  | 8.127285  | -2.103277 | 14.659522 |
| Ti | 13.353821 | -4.174091 | 14.492150 |
| O  | 13.792470 | -3.861243 | 12.656394 |
| O  | 15.757074 | -3.617568 | 10.355309 |
| Ti | 14.205711 | -4.505700 | 10.941683 |
| O  | 14.134270 | -6.338887 | 10.754094 |
| O  | 13.136937 | -6.032000 | 14.455726 |
| O  | 11.701719 | -3.625800 | 15.105170 |
| Ti | 9.999954  | -3.075157 | 14.414244 |
| O  | 10.199239 | -3.111224 | 12.617975 |
| O  | 12.497875 | -4.256013 | 10.042382 |
| Ti | 10.623535 | -3.620022 | 10.743986 |
| Ti | -7.671391 | 2.047325  | 10.627195 |
| O  | -7.258816 | 1.614075  | 12.458430 |
| O  | -8.356538 | 0.635721  | 14.984783 |
| Ti | -7.033891 | 1.806641  | 14.288434 |
| O  | -6.833973 | 3.702993  | 14.395252 |
| O  | -7.614934 | 3.936743  | 10.478811 |
| O  | -5.913239 | 1.438317  | 10.031439 |
| Ti | -4.093683 | 1.004804  | 10.698271 |
| O  | -3.849290 | 0.935168  | 12.592437 |
| O  | -5.381989 | 1.373218  | 15.068394 |
| Ti | -3.700799 | 0.807476  | 14.429747 |
| O  | -1.836944 | -0.175948 | 14.829306 |
| O  | -2.187788 | -0.045281 | 10.525130 |
| Ti | -5.928604 | 4.805539  | 10.666796 |
| O  | -6.088186 | 5.809521  | 12.256555 |
| Ti | -5.413806 | 4.427380  | 13.418934 |
| O  | -5.039739 | 3.402124  | 11.820468 |
| O  | -3.922239 | 4.731378  | 14.491026 |
| O  | -4.078311 | 5.353012  | 10.061230 |
| O  | -2.835967 | 2.560844  | 10.226275 |
| Ti | -2.356608 | 4.512796  | 10.558507 |
| O  | -2.166335 | 4.550304  | 12.399598 |
| O  | -2.423441 | 2.348549  | 14.836508 |
| Ti | -2.078102 | 4.217746  | 14.266944 |
| O  | -0.774535 | 5.487932  | 14.896422 |
| O  | -0.092065 | 3.180132  | 13.891483 |
| O  | -0.380849 | 3.452108  | 10.563548 |
| O  | -1.124713 | 6.053857  | 10.044952 |
| O  | 0.952638  | 5.617792  | 12.277417 |
| Ti | 0.605383  | 5.065493  | 10.498426 |
| Ti | 0.788618  | 4.851333  | 13.990480 |
| Ti | -0.622666 | 1.264892  | 14.252143 |

|    |            |           |           |
|----|------------|-----------|-----------|
| O  | -0.602803  | 1.001803  | 12.428766 |
| Ti | -0.900935  | 1.446123  | 10.598446 |
| Ti | -9.973236  | -4.199988 | 10.742941 |
| Ti | -9.436020  | -4.175029 | 13.509382 |
| O  | -10.354003 | -2.374330 | 10.397820 |
| Ti | -9.102239  | -0.948996 | 10.587544 |
| O  | -8.755670  | -0.900145 | 12.473180 |
| O  | -9.699156  | -2.620376 | 14.495252 |
| Ti | -8.503266  | -1.125825 | 14.298082 |
| O  | -8.395093  | -3.913665 | 11.916998 |
| O  | -9.187626  | 0.959199  | 10.374949 |
| O  | -7.425360  | -1.726889 | 10.022647 |
| Ti | -5.713413  | -2.561995 | 10.642748 |
| O  | -10.894836 | -4.637658 | 12.341847 |
| O  | -5.643615  | -1.895361 | 12.415333 |
| O  | -6.979332  | -1.927995 | 15.053772 |
| Ti | -5.422327  | -2.459629 | 14.167074 |
| Ti | -7.136961  | -6.213972 | 10.467138 |
| O  | -9.134937  | -5.843843 | 9.955310  |
| O  | -5.943569  | -4.324786 | 13.699552 |
| O  | -5.360427  | -6.684907 | 14.696736 |
| O  | -7.388319  | -6.812789 | 12.257587 |
| Ti | -6.863817  | -5.965627 | 13.830916 |
| O  | -8.578657  | -5.487737 | 14.528038 |
| O  | -6.268357  | -4.484931 | 10.276090 |
| O  | -2.541988  | -6.715414 | 9.865256  |
| O  | -2.277484  | -6.267948 | 14.817225 |
| O  | -3.665193  | -3.614222 | 14.765593 |
| Ti | -3.899221  | -5.489297 | 14.197442 |
| O  | -3.706726  | -5.551880 | 12.354710 |
| O  | -3.865130  | -3.612468 | 10.547211 |
| Ti | -4.092941  | -5.673605 | 10.494928 |
| O  | -5.441357  | -7.044818 | 10.401565 |
| O  | -4.539981  | -0.969283 | 10.200638 |
| O  | -4.169596  | -1.098913 | 14.889922 |
| O  | -0.757521  | -2.771746 | 15.128090 |
| Ti | -2.353707  | -2.091924 | 14.396481 |
| O  | -2.379209  | -2.133014 | 12.551929 |
| O  | -0.942368  | -2.883436 | 10.068669 |
| Ti | -2.620570  | -2.025689 | 10.631503 |
| O  | 0.908230   | 0.880374  | 10.083669 |
| Ti | 2.612579   | 0.086914  | 10.642366 |
| O  | 2.523902   | 0.357621  | 12.522574 |
| O  | 0.974032   | 0.912110  | 15.176187 |
| Ti | 2.552809   | 0.263605  | 14.387797 |
| O  | 2.467541   | 4.546574  | 14.756411 |
| O  | 2.435594   | 4.473480  | 10.058956 |
| O  | 3.762833   | 1.740248  | 10.200646 |
| Ti | 4.189676   | 3.700155  | 10.494139 |
| O  | 4.001023   | 3.798443  | 12.350943 |
| O  | 3.797561   | 1.858034  | 14.766752 |
| Ti | 4.127054   | 3.739041  | 14.225504 |

|    |           |           |           |
|----|-----------|-----------|-----------|
| O  | 5.491972  | 5.047618  | 14.708392 |
| O  | 5.405248  | 5.272371  | 10.005212 |
| Ti | 0.884825  | -3.445049 | 10.607452 |
| O  | 0.766444  | -2.696755 | 12.340236 |
| Ti | 0.805891  | -3.121398 | 14.154869 |
| Ti | -0.609975 | -7.093646 | 10.401464 |
| O  | 0.262230  | -4.982390 | 13.671532 |
| O  | -1.030917 | -7.386269 | 12.238252 |
| Ti | -0.672636 | -6.613163 | 13.897400 |
| O  | 0.269172  | -5.359302 | 10.261313 |
| O  | 2.033942  | -1.815080 | 10.170633 |
| O  | 2.021735  | -1.653059 | 14.750463 |

anatase-like 3-D (1,2,2)-mer

|    |           |           |           |
|----|-----------|-----------|-----------|
| O  | 0.998354  | 0.643969  | 1.690999  |
| O  | 1.037135  | 0.523560  | -2.903116 |
| O  | 2.747422  | 4.197362  | 1.692015  |
| O  | 2.752076  | 3.816154  | -1.681248 |
| O  | 4.046212  | 6.230799  | -0.281846 |
| Ti | 3.681893  | 5.437603  | -1.926650 |
| Ti | 3.626423  | 5.920016  | 1.562904  |
| Ti | 2.141509  | 2.284721  | 1.279627  |
| O  | 2.301780  | 1.494873  | -0.443703 |
| Ti | 2.253576  | 1.960772  | -2.243503 |
| O  | -2.439534 | -6.421921 | 1.863788  |
| O  | 0.554235  | -5.680617 | -2.919019 |
| O  | 0.526331  | -5.664113 | 1.814365  |
| O  | -0.781695 | -2.898004 | 1.612877  |
| Ti | -1.213797 | -4.859373 | 1.354984  |
| O  | -0.985185 | -4.963437 | -0.503729 |
| O  | -0.748949 | -2.996031 | -2.942447 |
| Ti | -1.108359 | -4.876837 | -2.375622 |
| O  | -2.472453 | -6.184583 | -2.863731 |
| O  | 2.044687  | -2.072047 | 1.736974  |
| Ti | 0.356497  | -1.235512 | 1.184251  |
| O  | 0.501860  | -1.498414 | -0.700311 |
| O  | 2.071861  | -2.033694 | -3.369299 |
| Ti | 0.491677  | -1.397091 | -2.562157 |
| O  | 3.832700  | 1.645113  | -3.218722 |
| Ti | 5.429457  | 0.924138  | -2.530839 |
| O  | 5.471200  | 0.984871  | -0.688456 |
| O  | 3.996765  | 1.797129  | 1.811897  |
| Ti | 5.669095  | 0.941794  | 1.242045  |
| O  | 7.557070  | -0.146136 | 1.691411  |
| O  | 7.246734  | -0.095104 | -3.033458 |
| O  | 5.585604  | 5.520863  | 2.065061  |
| O  | 5.302633  | 5.072996  | -2.832612 |
| O  | 6.782465  | 2.418172  | -2.863810 |
| Ti | 6.940194  | 4.281252  | -2.270295 |
| O  | 6.777406  | 4.412557  | -0.425497 |
| O  | 6.984527  | 2.456027  | 1.335603  |
| Ti | 7.154159  | 4.507294  | 1.437743  |

|    |           |           |           |
|----|-----------|-----------|-----------|
| O  | 8.518892  | 5.876166  | 1.571035  |
| O  | 9.363748  | 3.306373  | 1.647549  |
| O  | 8.977310  | 3.040939  | -1.638668 |
| O  | 8.465130  | 5.383611  | -2.782572 |
| O  | 10.486487 | 5.555131  | -0.307943 |
| Ti | 9.923129  | 4.652422  | -1.839407 |
| O  | 11.609346 | 4.059949  | -2.510219 |
| Ti | 10.207834 | 5.040658  | 1.505531  |
| O  | 12.180541 | 4.525850  | 1.989619  |
| Ti | 12.978830 | 2.809830  | 1.305915  |
| Ti | 12.436865 | 2.750515  | -1.455551 |
| O  | 13.366409 | 0.973539  | 1.634688  |
| Ti | 12.185190 | -0.510251 | 1.487442  |
| O  | 12.019888 | -0.731025 | -0.404036 |
| O  | 12.809225 | 1.179871  | -2.392238 |
| Ti | 11.641085 | -0.323853 | -2.202199 |
| O  | 11.390967 | 2.431659  | 0.112003  |
| O  | 12.085463 | -2.544079 | 1.864178  |
| O  | 10.501933 | 0.350787  | 1.859094  |
| Ti | 8.870760  | 1.384458  | 1.247081  |
| O  | 13.878995 | 3.262205  | -0.304568 |
| O  | 8.699513  | 0.560781  | -0.465917 |
| O  | 10.123533 | 0.560619  | -2.908419 |
| Ti | 8.508752  | 1.183415  | -2.192338 |
| Ti | 3.657105  | -2.410839 | -2.439304 |
| O  | 3.623566  | -2.119468 | -0.619773 |
| Ti | 3.865008  | -2.575296 | 1.213152  |
| Ti | 2.222696  | -5.991552 | -2.138935 |
| O  | 3.349409  | -4.591858 | 1.261580  |
| O  | 4.084894  | -7.195877 | 1.796176  |
| O  | 2.038997  | -6.749148 | -0.427372 |
| Ti | 2.366446  | -6.206278 | 1.365092  |
| O  | 3.116466  | -4.318470 | -2.077147 |
| Ti | 8.889647  | -6.179365 | 1.081879  |
| O  | 9.009160  | -7.189375 | -0.519597 |
| Ti | 8.433818  | -5.751154 | -1.673436 |
| O  | 8.146629  | -4.727738 | -0.080958 |
| O  | 6.917327  | -5.945350 | -2.726713 |
| O  | 7.038959  | -6.545408 | 1.737507  |
| O  | 5.809025  | -3.682805 | 1.586639  |
| Ti | 5.322088  | -5.646183 | 1.299315  |
| O  | 5.186536  | -5.662618 | -0.558048 |
| O  | 5.459070  | -3.511955 | -3.005011 |
| Ti | 5.093156  | -5.379100 | -2.420928 |
| O  | 3.784479  | -6.652591 | -3.033899 |
| O  | 4.905345  | -0.979999 | -2.994778 |
| O  | 5.133445  | -1.040479 | 1.311612  |
| Ti | 10.459865 | -3.426608 | 1.157539  |
| O  | 10.318952 | -2.844727 | -0.635282 |
| O  | 11.463054 | -1.988289 | -3.106771 |
| Ti | 10.070632 | -3.108893 | -2.479681 |
| O  | 9.878971  | -4.995579 | -2.611076 |

|    |            |           |           |
|----|------------|-----------|-----------|
| O  | 10.596820  | -5.303625 | 1.228636  |
| O  | 8.789327   | -2.680326 | 1.767367  |
| Ti | 6.993846   | -2.053281 | 1.169438  |
| O  | 6.856901   | -2.113744 | -0.731811 |
| O  | 8.428530   | -2.600575 | -3.206091 |
| Ti | 6.744635   | -1.993646 | -2.576061 |
| Ti | -10.438461 | 2.808398  | -1.761398 |
| O  | -11.042401 | 2.248414  | -0.014879 |
| O  | -13.112287 | 2.264442  | 1.789632  |
| Ti | -11.332500 | 2.977735  | 1.842292  |
| O  | -11.230046 | 4.824163  | 1.734150  |
| O  | -10.355703 | 4.656087  | -1.984352 |
| O  | -8.735683  | 2.291187  | -2.362754 |
| Ti | -6.934538  | 1.746985  | -2.198856 |
| O  | -6.788465  | 1.356675  | -0.382175 |
| O  | -9.273082  | 3.040306  | 2.069349  |
| Ti | -7.511134  | 2.347202  | 1.323482  |
| O  | -5.543341  | 1.360752  | 1.785669  |
| O  | -5.035677  | 0.879510  | -2.707544 |
| Ti | -8.725725  | 5.271604  | -1.217200 |
| O  | -9.313701  | 6.392294  | 0.150556  |
| Ti | -9.294095  | 5.175778  | 1.673047  |
| O  | -8.311228  | 3.896400  | 0.052758  |
| O  | -7.787629  | 6.241466  | 2.445387  |
| O  | -7.394005  | 5.635776  | -2.473803 |
| O  | -5.808544  | 3.377094  | -2.485450 |
| Ti | -5.556128  | 5.326266  | -1.958298 |
| O  | -5.869100  | 5.846861  | -0.191662 |
| O  | -6.197728  | 3.895072  | 1.470344  |
| Ti | -5.891891  | 5.988231  | 1.721036  |
| O  | -4.662633  | 7.476082  | 1.800216  |
| O  | -3.838756  | 4.911801  | 1.853652  |
| O  | -3.621238  | 4.308465  | -1.421190 |
| O  | -4.237601  | 6.526397  | -2.671568 |
| O  | -2.454714  | 6.815236  | -0.123203 |
| Ti | -2.660260  | 5.936411  | -1.757902 |
| Ti | -2.949792  | 6.631382  | 1.725199  |
| Ti | -4.354665  | 2.964979  | 1.384356  |
| O  | -3.884066  | 2.004474  | -0.208634 |
| Ti | -3.951197  | 2.380065  | -2.032027 |
| Ti | -12.504559 | -2.757991 | -1.480950 |
| Ti | -12.724475 | -2.167466 | 1.341263  |
| O  | -12.929008 | -1.517303 | -2.812669 |
| Ti | -11.978614 | 0.141298  | -2.736984 |
| O  | -12.969495 | 0.635174  | -1.175044 |
| O  | -13.851495 | -0.637914 | 1.334206  |
| Ti | -12.803850 | 0.790240  | 0.671711  |
| O  | -11.295828 | -1.969361 | -0.145541 |
| O  | -11.567136 | 1.953017  | -3.028122 |
| O  | -10.337597 | -0.603550 | -3.275040 |
| Ti | -8.734876  | -1.276062 | -2.526615 |
| O  | -13.714164 | -3.048096 | -0.116005 |

|    |            |           |           |
|----|------------|-----------|-----------|
| O  | -8.866970  | -0.838013 | -0.750436 |
| O  | -11.193201 | -0.118516 | 1.509208  |
| Ti | -9.439216  | -1.149510 | 1.052879  |
| Ti | -10.197969 | -4.840010 | -1.842034 |
| O  | -11.937468 | -4.340462 | -2.346488 |
| O  | -9.724741  | -3.178545 | 1.375435  |
| O  | -8.934365  | -5.705247 | 2.021362  |
| O  | -10.707923 | -5.540251 | -0.144463 |
| Ti | -10.666261 | -4.843711 | 1.592889  |
| O  | -12.359623 | -3.978653 | 2.170017  |
| O  | -9.364156  | -3.160208 | -2.150567 |
| O  | -5.722834  | -5.169173 | -2.820182 |
| O  | -6.007243  | -4.932196 | 1.853375  |
| O  | -7.425214  | -2.128254 | 1.568151  |
| Ti | -7.722525  | -4.132162 | 1.385390  |
| O  | -7.490817  | -4.347061 | -0.455234 |
| O  | -7.026906  | -2.540751 | -3.042170 |
| Ti | -7.360258  | -4.345404 | -2.354570 |
| O  | -8.774713  | -5.657929 | -2.743337 |
| O  | -7.382297  | 0.022900  | -3.203018 |
| O  | -8.227457  | 0.426799  | 1.401318  |
| O  | -4.564196  | -1.269180 | 1.663920  |
| Ti | -6.278796  | -0.437950 | 0.981849  |
| O  | -5.806478  | -1.235413 | -0.755607 |
| O  | -4.109753  | -1.653824 | -3.464725 |
| Ti | -5.662816  | -1.056696 | -2.589328 |
| O  | -2.423223  | 2.233394  | -3.111520 |
| Ti | -0.797570  | 1.512960  | -2.476082 |
| O  | -0.859734  | 1.585663  | -0.642207 |
| O  | -2.475153  | 2.705101  | 1.981219  |
| Ti | -0.935732  | 1.717385  | 1.302924  |
| O  | -0.981635  | 6.300338  | 2.202690  |
| O  | -1.058951  | 5.617268  | -2.663717 |
| O  | 0.483881   | 3.070567  | -2.824788 |
| Ti | 0.697721   | 4.942982  | -2.190349 |
| O  | 0.490944   | 5.136860  | -0.361590 |
| O  | 0.307745   | 3.289706  | 1.392842  |
| Ti | 0.626738   | 5.369593  | 1.534241  |
| O  | 1.948011   | 6.787509  | 1.609997  |
| O  | 2.112910   | 6.118945  | -2.775571 |
| Ti | -2.533136  | -1.889946 | -2.466615 |
| O  | -2.704381  | -1.514536 | -0.673868 |
| Ti | -2.762220  | -1.814502 | 1.211876  |
| Ti | -4.017037  | -5.443129 | -2.058389 |
| O  | -3.205072  | -3.864038 | 1.219269  |
| O  | -4.361161  | -6.139272 | -0.343472 |
| Ti | -4.154730  | -5.483516 | 1.416509  |
| O  | -3.113933  | -3.793641 | -2.069696 |
| O  | -1.323225  | -0.400145 | -2.999200 |
| O  | -1.501073  | -0.256773 | 1.333765  |
| O  | 2.645506   | 0.083352  | 8.095398  |
| O  | 2.810807   | -0.248876 | 3.839719  |

|    |           |           |          |
|----|-----------|-----------|----------|
| O  | 4.395914  | 3.636551  | 8.022493 |
| O  | 4.468135  | 3.356073  | 4.202241 |
| O  | 5.799403  | 5.557227  | 5.886582 |
| Ti | 5.487129  | 4.953344  | 4.139018 |
| Ti | 5.328444  | 5.336080  | 7.744544 |
| Ti | 3.746125  | 1.737367  | 7.659091 |
| O  | 3.932370  | 1.401730  | 5.862283 |
| Ti | 3.987680  | 1.337207  | 3.944980 |
| O  | -0.852565 | -7.074199 | 8.173106 |
| O  | 2.287899  | -6.783092 | 3.468109 |
| O  | 2.217939  | -6.274443 | 8.096417 |
| O  | 0.922302  | -3.539663 | 8.071488 |
| Ti | 0.411441  | -5.503936 | 7.704468 |
| O  | 0.650435  | -5.625035 | 5.880823 |
| O  | 1.036159  | -3.861561 | 3.861143 |
| Ti | 0.616180  | -5.883287 | 3.993850 |
| O  | -0.711160 | -7.329004 | 3.998667 |
| O  | 3.808762  | -2.511117 | 8.138632 |
| Ti | 2.017789  | -1.834063 | 7.639021 |
| O  | 2.172598  | -2.087914 | 5.811983 |
| O  | 3.983082  | -2.864509 | 3.375710 |
| Ti | 2.209986  | -2.246187 | 3.911317 |
| O  | 5.754197  | 0.720466  | 3.451846 |
| Ti | 7.482817  | -0.055601 | 3.971933 |
| O  | 7.322343  | 0.264330  | 5.789014 |
| O  | 5.579195  | 1.138398  | 8.195118 |
| Ti | 7.318269  | 0.393430  | 7.695331 |
| O  | 9.226386  | -0.676197 | 8.114984 |
| O  | 9.381969  | -1.057561 | 3.943665 |
| O  | 7.293447  | 4.902254  | 8.221101 |
| O  | 7.249025  | 4.164595  | 3.593185 |
| O  | 8.751527  | 1.511822  | 3.528492 |
| Ti | 9.029995  | 3.462268  | 4.007656 |
| O  | 8.887035  | 3.579276  | 5.820596 |
| O  | 8.608822  | 1.918124  | 7.798708 |
| Ti | 8.923737  | 3.948933  | 7.710024 |
| O  | 10.351579 | 5.294348  | 7.612533 |
| O  | 11.081158 | 2.728234  | 8.001792 |
| O  | 11.086088 | 2.432528  | 4.055389 |
| O  | 10.320059 | 5.027885  | 3.628472 |
| O  | 12.477695 | 4.714652  | 5.735837 |
| Ti | 12.039030 | 4.076726  | 4.048309 |
| O  | 13.752549 | 3.083192  | 3.388295 |
| Ti | 11.999580 | 4.400811  | 7.604580 |
| O  | 13.947233 | 4.009959  | 8.211048 |
| Ti | 14.780773 | 2.313979  | 7.573100 |
| Ti | 14.479677 | 1.981219  | 4.791666 |
| O  | 15.002698 | 0.559891  | 8.213379 |
| Ti | 13.913611 | -1.041782 | 8.127097 |
| O  | 14.440524 | -1.519414 | 6.387383 |
| O  | 14.934075 | 0.278694  | 4.253006 |
| Ti | 13.962337 | -1.353832 | 4.581485 |



|    |            |           |          |
|----|------------|-----------|----------|
| O  | 13.309936  | 1.918074  | 6.284455 |
| O  | 13.452567  | -3.045993 | 8.422238 |
| O  | 12.203463  | -0.189095 | 8.303361 |
| Ti | 10.514028  | 0.814093  | 7.714032 |
| O  | 15.822647  | 2.631399  | 6.009888 |
| O  | 10.744790  | 0.387948  | 5.924511 |
| O  | 12.355055  | -0.583833 | 3.683238 |
| Ti | 10.667041  | 0.425392  | 4.049594 |
| Ti | 5.723043   | -3.562422 | 3.939761 |
| O  | 5.488856   | -3.372856 | 5.741342 |
| Ti | 5.559644   | -3.191166 | 7.643364 |
| Ti | 4.235335   | -7.223459 | 3.945091 |
| O  | 5.077792   | -5.260761 | 7.453200 |
| O  | 5.823074   | -7.778211 | 8.022017 |
| O  | 3.794451   | -7.456893 | 5.798981 |
| Ti | 4.036802   | -6.850313 | 7.567924 |
| O  | 5.155352   | -5.503154 | 3.641865 |
| Ti | 10.775322  | -6.561521 | 7.341291 |
| O  | 10.894836  | -7.460837 | 5.685671 |
| Ti | 10.644770  | -5.973118 | 4.453512 |
| O  | 10.391380  | -4.922066 | 6.119710 |
| O  | 9.237519   | -6.616363 | 3.220832 |
| O  | 8.906092   | -6.783132 | 7.962193 |
| O  | 7.508293   | -4.253595 | 8.006930 |
| Ti | 7.012729   | -6.197208 | 7.546767 |
| O  | 7.407768   | -6.484736 | 5.736074 |
| O  | 7.595601   | -4.556656 | 3.772318 |
| Ti | 7.229900   | -6.589125 | 3.866862 |
| O  | 5.941029   | -8.053624 | 3.904011 |
| O  | 6.869187   | -1.965908 | 3.517201 |
| O  | 6.730389   | -1.616935 | 7.739659 |
| Ti | 12.045703  | -3.786095 | 7.168460 |
| O  | 12.413092  | -2.932330 | 5.454521 |
| O  | 14.271186  | -2.849350 | 3.463972 |
| Ti | 12.546793  | -3.695642 | 3.621227 |
| O  | 12.459368  | -5.552952 | 3.881666 |
| O  | 12.427853  | -5.614889 | 7.611537 |
| O  | 10.516456  | -3.145354 | 8.166624 |
| Ti | 8.634243   | -2.579089 | 7.666384 |
| O  | 8.654560   | -2.759895 | 5.828099 |
| O  | 10.492518  | -3.880161 | 3.468906 |
| Ti | 8.801057   | -2.981655 | 3.952798 |
| Ti | -9.089058  | 2.836385  | 4.361284 |
| O  | -9.551457  | 2.045095  | 6.074010 |
| O  | -11.209718 | 1.505126  | 8.273982 |
| Ti | -9.522820  | 2.485520  | 7.965818 |
| O  | -9.560743  | 4.413058  | 7.900298 |
| O  | -9.382987  | 4.815479  | 3.839258 |
| O  | -7.482632  | 2.121619  | 3.533711 |
| Ti | -5.669833  | 1.426852  | 4.010073 |
| O  | -5.635997  | 1.490884  | 5.841099 |
| O  | -7.478170  | 2.797000  | 7.879285 |

|    |            |           |          |
|----|------------|-----------|----------|
| Ti | -5.878125  | 1.752377  | 7.729006 |
| O  | -3.888298  | 0.751370  | 8.115466 |
| O  | -3.738033  | 0.482182  | 3.850834 |
| Ti | -7.674708  | 5.598523  | 4.511489 |
| O  | -7.856748  | 6.424226  | 6.163205 |
| Ti | -7.784051  | 4.843586  | 7.367700 |
| O  | -7.589762  | 3.905578  | 5.514807 |
| O  | -6.390969  | 5.478211  | 8.621237 |
| O  | -5.831144  | 5.625708  | 3.846938 |
| O  | -4.491978  | 3.089622  | 3.695820 |
| Ti | -4.000278  | 4.991312  | 4.307839 |
| O  | -4.456339  | 5.237960  | 6.100584 |
| O  | -4.666750  | 3.334684  | 7.907092 |
| Ti | -4.373133  | 5.393320  | 7.992448 |
| O  | -3.109278  | 6.861934  | 8.008610 |
| O  | -2.254318  | 4.354312  | 8.130027 |
| O  | -2.081579  | 4.082617  | 4.426197 |
| O  | -2.843673  | 6.594283  | 3.844685 |
| O  | -0.865351  | 6.318835  | 6.056377 |
| Ti | -1.055128  | 5.685295  | 4.290591 |
| Ti | -1.358278  | 6.074631  | 7.901197 |
| Ti | -2.801189  | 2.420835  | 7.719862 |
| O  | -2.478022  | 2.059685  | 5.951827 |
| Ti | -2.561655  | 2.038720  | 4.045538 |
| Ti | -11.771172 | -3.557885 | 4.259133 |
| Ti | -11.638432 | -3.188879 | 7.048048 |
| O  | -12.137360 | -1.807427 | 3.369865 |
| Ti | -10.960294 | -0.123005 | 3.626538 |
| O  | -11.590727 | 0.099622  | 5.391662 |
| O  | -12.240244 | -1.538980 | 7.651041 |
| Ti | -11.182223 | -0.004147 | 7.193292 |
| O  | -10.460582 | -2.942470 | 5.549282 |
| O  | -10.791342 | 1.862880  | 3.545426 |
| O  | -9.324155  | -1.063677 | 3.320521 |
| Ti | -7.537612  | -1.940640 | 3.829907 |
| O  | -12.883254 | -3.900031 | 5.750211 |
| O  | -7.732364  | -1.612062 | 5.650130 |
| O  | -9.454094  | -0.744799 | 7.764419 |
| Ti | -7.684514  | -1.704152 | 7.515640 |
| Ti | -8.878271  | -5.620781 | 4.173737 |
| O  | -10.838410 | -5.225510 | 3.698591 |
| O  | -8.180335  | -3.684958 | 7.659860 |
| O  | -7.453498  | -6.242634 | 8.265881 |
| O  | -9.435468  | -5.932370 | 6.024882 |
| Ti | -9.153506  | -5.321987 | 7.746538 |
| O  | -10.914673 | -4.426755 | 8.310552 |
| O  | -8.044180  | -3.907153 | 3.732743 |
| O  | -4.292467  | -6.001761 | 3.531731 |
| O  | -4.420205  | -5.538094 | 8.182164 |
| O  | -5.782261  | -2.746164 | 8.064392 |
| Ti | -6.163535  | -4.728854 | 7.756353 |
| O  | -5.925952  | -4.762686 | 5.938339 |

|    |           |           |           |
|----|-----------|-----------|-----------|
| O  | -5.620925 | -3.053454 | 3.815888  |
| Ti | -5.918528 | -5.043653 | 4.049475  |
| O  | -7.248826 | -6.499111 | 4.173658  |
| O  | -6.290782 | -0.446507 | 3.464372  |
| O  | -6.430562 | -0.193119 | 7.692649  |
| O  | -2.809277 | -1.890875 | 8.170899  |
| Ti | -4.530217 | -1.147460 | 7.582862  |
| O  | -4.364443 | -1.453033 | 5.774628  |
| O  | -2.625595 | -2.181115 | 3.358986  |
| Ti | -4.384975 | -1.481733 | 3.848782  |
| O  | -0.839932 | 1.358780  | 3.473824  |
| Ti | 0.926771  | 0.688552  | 4.015830  |
| O  | 0.761189  | 0.920711  | 5.843460  |
| O  | -0.970490 | 1.930375  | 8.308376  |
| Ti | 0.710534  | 1.118446  | 7.744893  |
| O  | 0.615725  | 5.700740  | 8.375353  |
| O  | 0.688456  | 4.991210  | 3.677803  |
| O  | 2.036972  | 2.366801  | 3.580104  |
| Ti | 2.505884  | 4.302187  | 4.107173  |
| O  | 2.228294  | 4.473932  | 5.918306  |
| O  | 1.875521  | 2.741589  | 7.855882  |
| Ti | 2.286137  | 4.801671  | 7.805543  |
| O  | 3.651681  | 6.203445  | 7.787548  |
| O  | 3.717987  | 5.889614  | 3.687139  |
| Ti | -0.849270 | -2.817711 | 3.983532  |
| O  | -1.048339 | -2.592859 | 5.796108  |
| Ti | -1.019031 | -2.503656 | 7.707128  |
| Ti | -2.361148 | -6.445572 | 4.040325  |
| O  | -1.562610 | -4.530610 | 7.614925  |
| O  | -2.828017 | -6.680890 | 5.895432  |
| Ti | -2.576970 | -6.123817 | 7.675334  |
| O  | -1.466434 | -4.735146 | 3.699276  |
| O  | 0.288137  | -1.213983 | 3.554203  |
| O  | 0.129986  | -0.896428 | 7.776919  |
| O  | 4.302432  | -0.520913 | 14.494737 |
| O  | 4.460465  | -0.838191 | 10.271976 |
| O  | 6.056512  | 3.000446  | 14.349837 |
| O  | 6.153315  | 2.796514  | 10.434049 |
| O  | 7.418914  | 4.945986  | 12.153769 |
| Ti | 7.167577  | 4.388709  | 10.373744 |
| Ti | 6.951857  | 4.710815  | 14.008935 |
| Ti | 5.439516  | 1.083057  | 14.065563 |
| O  | 5.638564  | 0.858084  | 12.252936 |
| Ti | 5.609400  | 0.769389  | 10.341990 |
| O  | 0.872960  | -7.624319 | 14.361504 |
| O  | 3.975281  | -7.434945 | 9.673692  |
| O  | 3.902732  | -6.725209 | 14.371032 |
| O  | 2.553332  | -4.101595 | 14.468865 |
| Ti | 2.085209  | -6.036827 | 13.941760 |
| O  | 2.362364  | -6.208430 | 12.130710 |
| O  | 2.714876  | -4.476000 | 10.192955 |
| Ti | 2.304548  | -6.535904 | 10.243217 |

|    |           |           |           |
|----|-----------|-----------|-----------|
| O  | 0.939217  | -7.937686 | 10.261215 |
| O  | 5.430605  | -3.093332 | 14.574997 |
| Ti | 3.663406  | -2.423143 | 14.033080 |
| O  | 3.829057  | -2.655461 | 12.205276 |
| O  | 5.560993  | -3.664684 | 9.740637  |
| Ti | 3.879955  | -2.852800 | 10.303863 |
| O  | 7.399807  | 0.156554  | 9.878191  |
| Ti | 9.120535  | -0.587670 | 10.466121 |
| O  | 8.955702  | -0.282336 | 12.274270 |
| O  | 7.216043  | 0.447074  | 14.690251 |
| Ti | 8.975160  | -0.252865 | 14.200310 |
| O  | 10.881262 | -1.288059 | 14.583923 |
| O  | 11.021395 | -1.541680 | 10.355518 |
| O  | 8.883269  | 4.267432  | 14.517696 |
| O  | 9.010825  | 3.803616  | 9.866849  |
| O  | 10.372374 | 1.011532  | 9.984888  |
| Ti | 10.754156 | 2.994536  | 10.292673 |
| O  | 10.516207 | 3.028471  | 12.110642 |
| O  | 10.211121 | 1.318934  | 14.232705 |
| Ti | 10.509198 | 3.309357  | 13.999545 |
| O  | 11.839461 | 4.764695  | 13.875450 |
| O  | 12.634609 | 2.172693  | 14.316465 |
| O  | 12.770623 | 1.950568  | 10.389272 |
| O  | 12.043874 | 4.508437  | 9.783347  |
| O  | 14.025674 | 4.197683  | 12.024480 |
| Ti | 13.743970 | 3.587619  | 10.302746 |
| O  | 15.504677 | 2.692189  | 9.738852  |
| Ti | 13.469056 | 3.886423  | 13.875735 |
| O  | 15.429617 | 3.492399  | 14.351178 |
| Ti | 16.362641 | 1.824909  | 13.790743 |
| Ti | 16.229579 | 1.455686  | 11.002041 |
| O  | 16.728504 | 0.073450  | 14.678998 |
| Ti | 15.551262 | -1.610179 | 14.422101 |
| O  | 16.181501 | -1.832019 | 12.656809 |
| O  | 16.831290 | -0.193877 | 10.398124 |
| Ti | 15.773461 | -1.728915 | 10.855114 |
| O  | 15.051984 | 1.209042  | 12.500876 |
| O  | 15.382756 | -3.595259 | 14.503007 |
| O  | 13.914477 | -0.670617 | 14.728797 |
| Ti | 12.127866 | 0.206195  | 14.218940 |
| O  | 17.474302 | 2.167792  | 12.299602 |
| O  | 12.322779 | -0.122543 | 12.398668 |
| O  | 14.045283 | -0.988457 | 10.284316 |
| Ti | 12.274721 | -0.030260 | 10.533247 |
| Ti | 7.391651  | -4.155255 | 10.329076 |
| O  | 7.068678  | -3.793745 | 12.096975 |
| Ti | 7.152322  | -3.773212 | 14.003332 |
| Ti | 5.949115  | -7.809461 | 10.147793 |
| O  | 6.672467  | -5.817057 | 13.621809 |
| O  | 7.434785  | -8.328502 | 14.203992 |
| O  | 5.456515  | -8.053984 | 11.992444 |
| Ti | 5.646131  | -7.419705 | 13.757993 |

|    |           |           |           |
|----|-----------|-----------|-----------|
| O  | 6.845149  | -6.089050 | 9.918900  |
| Ti | 12.266498 | -7.331183 | 13.537168 |
| O  | 12.448543 | -8.157480 | 11.885291 |
| Ti | 12.375426 | -6.577290 | 10.680443 |
| O  | 12.181252 | -5.638854 | 12.533186 |
| O  | 10.982070 | -7.212052 | 9.427683  |
| O  | 10.422663 | -7.359055 | 14.201823 |
| O  | 9.082479  | -4.823960 | 14.353025 |
| Ti | 8.591282  | -6.725673 | 13.740726 |
| O  | 9.047234  | -6.972230 | 11.947940 |
| O  | 9.257454  | -5.069110 | 10.141208 |
| Ti | 8.964172  | -7.127967 | 10.056170 |
| O  | 7.700364  | -8.596559 | 10.040048 |
| O  | 8.478756  | -2.486162 | 9.933204  |
| O  | 8.328542  | -2.216900 | 14.198457 |
| Ti | 13.680311 | -4.569478 | 13.686976 |
| O  | 14.142256 | -3.778348 | 11.974293 |
| O  | 15.801507 | -3.238810 | 9.775073  |
| Ti | 14.114408 | -4.218638 | 10.082365 |
| O  | 14.152364 | -6.146701 | 10.147953 |
| O  | 13.975018 | -6.548462 | 14.209283 |
| O  | 12.073329 | -3.856021 | 14.514923 |
| Ti | 10.260678 | -3.161523 | 14.038489 |
| O  | 10.226996 | -3.225720 | 12.207426 |
| O  | 12.069729 | -4.530508 | 10.168794 |
| Ti | 10.468851 | -3.487481 | 10.319355 |
| Ti | -7.454316 | 2.052323  | 10.880686 |
| O  | -7.822094 | 1.198091  | 12.594488 |
| O  | -9.680257 | 1.116039  | 14.584660 |
| Ti | -7.955900 | 1.961581  | 14.427866 |
| O  | -7.868481 | 3.819557  | 14.166771 |
| O  | -7.836765 | 3.880886  | 10.437247 |
| O  | -5.925909 | 1.410608  | 9.881785  |
| Ti | -4.043833 | 0.844279  | 10.382370 |
| O  | -4.064788 | 1.025261  | 12.220583 |
| O  | -5.901454 | 2.146883  | 14.580533 |
| Ti | -4.210666 | 1.247726  | 14.095856 |
| O  | -2.279070 | 0.231122  | 14.531687 |
| O  | -2.140198 | -0.117857 | 10.309266 |
| Ti | -6.184550 | 4.827628  | 10.707452 |
| O  | -6.303410 | 5.726940  | 12.362840 |
| Ti | -6.053349 | 4.239325  | 13.595245 |
| O  | -5.800596 | 3.187845  | 11.929026 |
| O  | -4.646348 | 4.882498  | 14.828322 |
| O  | -4.315164 | 5.048312  | 10.086345 |
| O  | -2.918126 | 2.518778  | 10.041979 |
| Ti | -2.421803 | 4.462513  | 10.502118 |
| O  | -2.817634 | 4.750518  | 12.312730 |
| O  | -3.005085 | 2.822054  | 14.276154 |
| Ti | -2.639071 | 4.854510  | 14.181876 |
| O  | -1.349957 | 6.319107  | 14.144603 |
| O  | -0.564726 | 3.768421  | 14.406950 |

|    |            |           |           |
|----|------------|-----------|-----------|
| O  | -0.487190  | 3.526030  | 10.596064 |
| O  | -1.232049  | 6.043484  | 10.026989 |
| O  | 0.796738   | 5.722056  | 12.249970 |
| Ti | 0.553744   | 5.115537  | 10.481150 |
| Ti | 0.356015   | 5.488610  | 14.103930 |
| Ti | -1.132633  | 1.827725  | 14.109243 |
| O  | -0.899108  | 1.637830  | 12.307583 |
| Ti | -0.969181  | 1.456566  | 10.405492 |
| Ti | -10.189969 | -4.047438 | 10.475654 |
| Ti | -9.888293  | -3.714651 | 13.257015 |
| O  | -10.411833 | -2.293672 | 9.834838  |
| Ti | -9.322672  | -0.691436 | 9.921666  |
| O  | -9.850416  | -0.213364 | 11.660935 |
| O  | -10.342168 | -2.011997 | 13.795371 |
| Ti | -9.371107  | -0.378694 | 13.466720 |
| O  | -8.718637  | -3.652190 | 11.764011 |
| O  | -8.860468  | 1.312238  | 9.626230  |
| O  | -7.613139  | -1.545302 | 9.745603  |
| Ti | -5.923938  | -2.548609 | 10.335197 |
| O  | -11.231736 | -4.364093 | 12.039004 |
| O  | -6.155004  | -2.122061 | 12.124611 |
| O  | -7.764190  | -1.148901 | 14.366035 |
| Ti | -6.077102  | -2.159526 | 13.999502 |
| Ti | -7.409205  | -6.135224 | 10.444565 |
| O  | -9.356706  | -5.743984 | 9.838230  |
| O  | -6.495777  | -4.166691 | 13.993911 |
| O  | -5.729203  | -6.762300 | 14.420151 |
| O  | -7.887318  | -6.449127 | 12.313254 |
| Ti | -7.448261  | -5.811135 | 14.000606 |
| O  | -9.161716  | -4.817017 | 14.660482 |
| O  | -6.490383  | -4.462846 | 10.047332 |
| O  | -2.702634  | -6.636348 | 9.828054  |
| O  | -2.657873  | -5.898617 | 14.455615 |
| O  | -4.161855  | -3.246356 | 14.521203 |
| Ti | -4.439050  | -5.196601 | 14.041442 |
| O  | -4.296637  | -5.313668 | 12.228546 |
| O  | -4.018439  | -3.652662 | 10.250407 |
| Ti | -4.333314  | -5.683511 | 10.339137 |
| O  | -5.761128  | -7.028793 | 10.436621 |
| O  | -4.636154  | -1.058545 | 9.933873  |
| O  | -4.791765  | -0.676679 | 14.104955 |
| O  | -1.163898  | -2.454707 | 14.596859 |
| Ti | -2.892552  | -1.679278 | 14.077399 |
| O  | -2.733473  | -1.999311 | 12.260226 |
| O  | -0.988758  | -2.872601 | 9.853896  |
| Ti | -2.728076  | -2.128007 | 10.353825 |
| O  | 0.781676   | 0.776671  | 9.910189  |
| Ti | 2.572507   | 0.099581  | 10.409668 |
| O  | 2.417748   | 0.353097  | 12.236643 |
| O  | 0.607643   | 1.130316  | 14.672986 |
| Ti | 2.380282   | 0.511394  | 14.137404 |
| O  | 2.303048   | 5.048497  | 14.580830 |

|    |           |           |           |
|----|-----------|-----------|-----------|
| O  | 2.372923  | 4.539987  | 9.952336  |
| O  | 3.668047  | 1.805126  | 9.977278  |
| Ti | 4.179338  | 3.769392  | 10.344530 |
| O  | 3.940085  | 3.890297  | 12.168092 |
| O  | 3.554146  | 2.126750  | 14.187708 |
| Ti | 3.974405  | 4.148576  | 14.055081 |
| O  | 5.302170  | 5.594394  | 14.050081 |
| O  | 5.443322  | 5.339675  | 9.875877  |
| Ti | 0.844191  | -3.471625 | 10.389814 |
| O  | 0.657819  | -3.135776 | 12.186444 |
| Ti | 0.602649  | -3.069714 | 14.103825 |
| Ti | -0.738026 | -7.070568 | 10.304443 |
| O  | 0.122471  | -5.091340 | 13.846149 |
| O  | -1.208614 | -7.292109 | 12.162435 |
| Ti | -0.896327 | -6.688005 | 13.909888 |
| O  | 0.194763  | -5.371010 | 10.026504 |
| O  | 1.944818  | -1.817950 | 9.953187  |
| O  | 1.779677  | -1.486050 | 14.209166 |
| O  | 5.913831  | -1.334559 | 21.048409 |
| O  | 6.091595  | -1.477918 | 16.715127 |
| O  | 7.705519  | 2.059723  | 20.119345 |
| O  | 7.795414  | 2.129406  | 16.830146 |
| O  | 8.951675  | 4.404456  | 18.392707 |
| Ti | 8.745329  | 3.748897  | 16.632653 |
| Ti | 8.607409  | 3.709005  | 20.107692 |
| Ti | 7.123109  | 0.155695  | 20.516001 |
| O  | 7.294851  | -0.219140 | 18.723132 |
| Ti | 7.352480  | 0.079815  | 16.837334 |
| O  | 2.478898  | -7.852939 | 20.824368 |
| O  | 5.573009  | -8.034519 | 15.845945 |
| O  | 5.651552  | -7.349471 | 20.711882 |
| O  | 4.106729  | -4.804963 | 20.873509 |
| Ti | 3.894177  | -6.677222 | 20.238869 |
| O  | 4.100485  | -6.872150 | 18.410095 |
| O  | 4.282375  | -5.024455 | 16.656039 |
| Ti | 3.964473  | -7.104374 | 16.514330 |
| O  | 2.643070  | -8.521880 | 16.438135 |
| O  | 7.014000  | -3.968908 | 21.159315 |
| Ti | 5.388329  | -3.247563 | 20.524731 |
| O  | 5.450071  | -3.320264 | 18.690757 |
| O  | 7.065655  | -4.440054 | 16.067291 |
| Ti | 5.526403  | -3.452260 | 16.745647 |
| O  | 9.154313  | -0.465552 | 16.384938 |
| Ti | 10.869517 | -1.296354 | 17.067222 |
| O  | 10.393009 | -0.498488 | 18.804404 |
| O  | 8.700033  | -0.079926 | 21.514111 |
| Ti | 10.252779 | -0.677442 | 20.638158 |
| O  | 11.972507 | -1.756817 | 21.252227 |
| O  | 12.818608 | -2.161163 | 16.647250 |
| O  | 10.313143 | 3.435503  | 20.869646 |
| O  | 10.597884 | 3.197919  | 16.195834 |
| O  | 12.014989 | 0.394000  | 16.480635 |

|    |           |           |           |
|----|-----------|-----------|-----------|
| Ti | 12.313108 | 2.397794  | 16.663687 |
| O  | 12.081007 | 2.613103  | 18.504447 |
| O  | 11.616517 | 0.806759  | 21.091059 |
| Ti | 11.950420 | 2.611378  | 20.403740 |
| O  | 13.364372 | 3.924743  | 20.792703 |
| O  | 13.954434 | 1.426994  | 20.201646 |
| O  | 14.314930 | 1.444672  | 16.674119 |
| O  | 13.525029 | 3.970941  | 16.027859 |
| O  | 15.298129 | 3.806562  | 18.194288 |
| Ti | 15.256824 | 3.109854  | 16.456886 |
| O  | 16.949495 | 2.244100  | 15.879746 |
| Ti | 14.788194 | 3.106844  | 19.892460 |
| O  | 16.527096 | 2.608059  | 20.396457 |
| Ti | 17.094149 | 1.024714  | 19.530506 |
| Ti | 17.314155 | 0.432115  | 16.708355 |
| O  | 17.520418 | -0.214982 | 20.862359 |
| Ti | 16.570962 | -1.872575 | 20.786374 |
| O  | 17.561090 | -2.368789 | 19.224547 |
| O  | 18.442765 | -1.095582 | 16.716111 |
| Ti | 17.395075 | -2.523582 | 17.377713 |
| O  | 15.884952 | 0.235540  | 18.196174 |
| O  | 16.159281 | -3.686421 | 21.077955 |
| O  | 14.928557 | -1.129974 | 21.322812 |
| Ti | 13.324990 | -0.457656 | 20.575767 |
| O  | 18.303272 | 1.314050  | 18.165287 |
| O  | 13.454953 | -0.894539 | 18.799240 |
| O  | 15.785046 | -1.612557 | 16.540273 |
| Ti | 14.029185 | -0.584359 | 16.996133 |
| Ti | 8.945352  | -4.698745 | 16.664934 |
| O  | 8.474324  | -3.736554 | 18.256625 |
| Ti | 8.541847  | -4.113953 | 20.079385 |
| Ti | 7.540907  | -8.365548 | 16.323319 |
| O  | 8.213714  | -6.042108 | 19.466274 |
| O  | 8.829333  | -8.258576 | 20.720205 |
| O  | 7.045953  | -8.550157 | 18.171713 |
| Ti | 7.252278  | -7.669457 | 19.805236 |
| O  | 8.429841  | -6.645630 | 16.194672 |
| Ti | 13.318602 | -7.004005 | 19.265949 |
| O  | 13.906775 | -8.124954 | 17.898483 |
| Ti | 13.885592 | -6.908968 | 16.375197 |
| O  | 12.902328 | -5.630379 | 17.994784 |
| O  | 12.379532 | -7.974489 | 15.602983 |
| O  | 11.986287 | -7.368118 | 20.522039 |
| O  | 10.399311 | -5.110675 | 20.534121 |
| Ti | 10.148089 | -7.059493 | 20.006586 |
| O  | 10.461077 | -7.580984 | 18.240174 |
| O  | 10.788607 | -5.628655 | 16.578404 |
| Ti | 10.483417 | -7.721570 | 16.327577 |
| O  | 9.254384  | -9.209660 | 16.248807 |
| O  | 10.134564 | -3.095223 | 16.263180 |
| O  | 9.626313  | -2.611676 | 20.756256 |
| Ti | 15.030932 | -4.539461 | 19.810205 |



|    |           |           |           |
|----|-----------|-----------|-----------|
| O  | 15.633894 | -3.981040 | 18.063315 |
| O  | 17.703287 | -3.997066 | 16.257995 |
| Ti | 15.923718 | -4.710635 | 16.205806 |
| O  | 15.821955 | -6.556544 | 16.313746 |
| O  | 14.948446 | -6.387256 | 20.032626 |
| O  | 13.327283 | -4.024056 | 20.410362 |
| Ti | 11.525529 | -3.479044 | 20.247762 |
| O  | 11.379668 | -3.090990 | 18.431087 |
| O  | 13.864933 | -4.772708 | 15.979083 |
| Ti | 12.102405 | -4.081044 | 16.725305 |
| Ti | -5.868559 | 1.694535  | 16.891718 |
| O  | -5.727995 | 1.110380  | 18.684637 |
| O  | -6.870713 | 0.255025  | 21.156370 |
| Ti | -5.478892 | 1.375615  | 20.528947 |
| O  | -5.287501 | 3.262259  | 20.660482 |
| O  | -6.005498 | 3.570619  | 16.820697 |
| O  | -4.198791 | 0.946285  | 16.281352 |
| Ti | -2.403493 | 0.318341  | 16.879278 |
| O  | -2.266563 | 0.379567  | 18.780406 |
| O  | -3.837103 | 0.866926  | 21.255216 |
| Ti | -2.153757 | 0.259531  | 20.624753 |
| O  | -0.314435 | -0.754987 | 21.043328 |
| O  | -0.543488 | -0.694305 | 16.736992 |
| Ti | -4.298626 | 4.446151  | 16.967316 |
| O  | -4.417294 | 5.456323  | 18.569170 |
| Ti | -3.842367 | 4.017610  | 19.722542 |
| O  | -3.556075 | 2.994284  | 18.130114 |
| O  | -2.325877 | 4.211502  | 20.776019 |
| O  | -2.447929 | 4.811610  | 16.311228 |
| O  | -1.219041 | 1.947910  | 16.461869 |
| Ti | -0.731363 | 3.911404  | 16.749368 |
| O  | -0.595950 | 3.927787  | 18.606860 |
| O  | -0.868239 | 1.777383  | 21.053833 |
| Ti | -0.502199 | 3.644450  | 20.469820 |
| O  | 0.806473  | 4.918215  | 21.082654 |
| O  | 1.474637  | 2.583896  | 20.126684 |
| O  | 1.241104  | 2.857306  | 16.787115 |
| O  | 0.505878  | 5.461261  | 16.252707 |
| O  | 2.551853  | 5.014292  | 18.476334 |
| Ti | 2.224233  | 4.471551  | 16.683913 |
| Ti | 2.368266  | 4.257067  | 20.187566 |
| Ti | 0.933549  | 0.676520  | 20.488168 |
| O  | 0.966810  | 0.385556  | 18.668651 |
| Ti | 0.725304  | 0.840600  | 16.835404 |
| Ti | -8.387187 | -4.542799 | 16.741993 |
| Ti | -7.843913 | -4.483748 | 19.503308 |
| O  | -8.775571 | -2.706657 | 16.414140 |
| Ti | -7.594592 | -1.222257 | 16.561691 |
| O  | -7.428900 | -1.001954 | 18.453026 |
| O  | -8.217157 | -2.913729 | 20.440375 |
| Ti | -7.049035 | -1.409798 | 20.251142 |
| O  | -6.798278 | -4.164138 | 17.935358 |

|    |           |           |           |
|----|-----------|-----------|-----------|
| O  | -7.494595 | 0.809571  | 16.185245 |
| O  | -5.911759 | -2.084158 | 16.189798 |
| Ti | -4.281843 | -3.119185 | 16.802961 |
| O  | -9.286338 | -4.995325 | 18.352657 |
| O  | -4.109577 | -2.293781 | 18.515156 |
| O  | -5.532253 | -2.295677 | 20.957987 |
| Ti | -3.917962 | -2.918017 | 20.240815 |
| Ti | -5.617010 | -6.775971 | 16.543132 |
| O  | -7.589490 | -6.259805 | 16.059205 |
| O  | -4.385946 | -4.775372 | 19.685470 |
| O  | -3.873704 | -7.117588 | 20.831497 |
| O  | -5.895352 | -7.290389 | 18.356485 |
| Ti | -5.331242 | -6.386936 | 19.887402 |
| O  | -7.017208 | -5.793870 | 20.557711 |
| O  | -4.772988 | -5.041490 | 16.401262 |
| O  | -0.994623 | -7.255291 | 15.983663 |
| O  | -0.710556 | -6.806823 | 20.880816 |
| O  | -2.192531 | -4.152811 | 20.912392 |
| Ti | -2.348416 | -6.015698 | 20.318807 |
| O  | -2.185992 | -6.147724 | 18.473988 |
| O  | -2.395052 | -4.190525 | 16.713645 |
| Ti | -2.563477 | -6.241881 | 16.610885 |
| O  | -3.927853 | -7.610985 | 16.477379 |
| O  | -2.967472 | -1.588919 | 16.357845 |
| O  | -2.655946 | -1.640554 | 21.081961 |
| O  | 0.757946  | -3.380094 | 21.267130 |
| Ti | -0.838482 | -2.658650 | 20.579396 |
| O  | -0.880884 | -2.719329 | 18.737051 |
| O  | 0.593229  | -3.531925 | 16.237018 |
| Ti | -1.079293 | -2.676453 | 16.806569 |
| O  | 2.545655  | 0.337310  | 16.311882 |
| Ti | 4.233625  | -0.499334 | 16.864740 |
| O  | 4.088632  | -0.236365 | 18.749407 |
| O  | 2.519011  | 0.298975  | 21.418414 |
| Ti | 4.098744  | -0.337664 | 20.611208 |
| O  | 4.036779  | 3.946348  | 20.968595 |
| O  | 4.064505  | 3.929673  | 16.234516 |
| O  | 5.371917  | 1.163283  | 16.436183 |
| Ti | 5.804098  | 3.124556  | 16.694266 |
| O  | 5.575598  | 3.228713  | 18.552774 |
| O  | 5.339234  | 1.261343  | 20.991830 |
| Ti | 5.697315  | 3.142188  | 20.424508 |
| O  | 7.063069  | 4.450769  | 20.912561 |
| O  | 7.029947  | 4.687323  | 16.185356 |
| Ti | 2.448570  | -4.018940 | 16.769461 |
| O  | 2.288626  | -3.228300 | 18.492439 |
| Ti | 2.337188  | -3.695236 | 20.291822 |
| Ti | 0.964519  | -7.654842 | 16.485903 |
| O  | 1.839607  | -5.550645 | 19.728476 |
| O  | 0.545103  | -7.966191 | 18.330410 |
| Ti | 0.910057  | -7.171957 | 19.974774 |
| O  | 1.844461  | -5.931856 | 16.356854 |

|                              |           |           |           |
|------------------------------|-----------|-----------|-----------|
| O                            | 3.592069  | -2.378987 | 16.357633 |
| O                            | 3.553689  | -2.258447 | 20.952156 |
| anatase-like 3-D (1,2,3)-mer |           |           |           |
| O                            | 0.935951  | 0.659982  | 1.536394  |
| O                            | 0.992923  | 0.496548  | -3.056521 |
| O                            | 2.668519  | 4.227848  | 1.597057  |
| O                            | 2.671025  | 3.800767  | -1.771855 |
| O                            | 3.932157  | 6.251167  | -0.389135 |
| Ti                           | 3.585053  | 5.443953  | -2.024751 |
| Ti                           | 3.529502  | 5.956616  | 1.475037  |
| Ti                           | 2.064708  | 2.315826  | 1.146598  |
| O                            | 2.261623  | 1.492016  | -0.570571 |
| Ti                           | 2.207583  | 1.923946  | -2.374496 |
| O                            | -2.527712 | -6.407688 | 1.708223  |
| O                            | 0.526053  | -5.651312 | -3.062359 |
| O                            | 0.458317  | -5.662291 | 1.642939  |
| O                            | -0.839476 | -2.894271 | 1.449713  |
| Ti                           | -1.289923 | -4.857446 | 1.197222  |
| O                            | -1.042417 | -4.947995 | -0.667312 |
| O                            | -0.801961 | -2.991195 | -3.130345 |
| Ti                           | -1.163108 | -4.872849 | -2.533709 |
| O                            | -2.505849 | -6.207851 | -3.007702 |
| O                            | 1.990878  | -2.053926 | 1.566462  |
| Ti                           | 0.299651  | -1.223899 | 1.020820  |
| O                            | 0.443635  | -1.511668 | -0.866853 |
| O                            | 2.022894  | -2.049469 | -3.528563 |
| Ti                           | 0.436573  | -1.409349 | -2.722759 |
| O                            | 3.783623  | 1.655903  | -3.363531 |
| Ti                           | 5.374543  | 0.933899  | -2.663726 |
| O                            | 5.408145  | 1.009418  | -0.829512 |
| O                            | 3.935878  | 1.872927  | 1.681419  |
| Ti                           | 5.619286  | 1.043511  | 1.112907  |
| O                            | 7.526540  | -0.018652 | 1.525532  |
| O                            | 7.190514  | -0.080639 | -3.180069 |
| O                            | 5.488856  | 5.590462  | 1.970013  |
| O                            | 5.181541  | 5.086842  | -2.967908 |
| O                            | 6.713191  | 2.445273  | -3.001551 |
| Ti                           | 6.816006  | 4.304057  | -2.387154 |
| O                            | 6.649914  | 4.499093  | -0.550555 |
| O                            | 6.931567  | 2.536942  | 1.156287  |
| Ti                           | 7.057643  | 4.598678  | 1.315736  |
| O                            | 8.370492  | 6.034959  | 1.438239  |
| O                            | 9.230884  | 3.477453  | 1.507921  |
| O                            | 8.832565  | 3.076983  | -1.671182 |
| O                            | 8.339039  | 5.397193  | -2.921718 |
| O                            | 10.349283 | 5.670570  | -0.439705 |
| Ti                           | 9.767794  | 4.701479  | -1.920169 |
| O                            | 11.422189 | 4.036045  | -2.569682 |
| Ti                           | 10.058394 | 5.217853  | 1.392082  |
| O                            | 12.008919 | 4.604502  | 1.829826  |
| Ti                           | 12.755985 | 2.778294  | 1.285488  |

|    |            |           |           |
|----|------------|-----------|-----------|
| Ti | 12.156317  | 2.696156  | -1.477345 |
| O  | 13.192161  | 0.946782  | 1.478437  |
| Ti | 12.026309  | -0.576734 | 1.293871  |
| O  | 11.950646  | -0.795432 | -0.606919 |
| O  | 12.651838  | 1.192365  | -2.467535 |
| Ti | 11.534411  | -0.354768 | -2.383945 |
| O  | 11.070289  | 2.354515  | 0.089830  |
| O  | 11.877135  | -2.640207 | 1.590125  |
| O  | 10.392895  | 0.370148  | 1.667258  |
| Ti | 8.880206   | 1.535310  | 1.000604  |
| O  | 13.586293  | 3.240615  | -0.355274 |
| O  | 8.614664   | 0.540882  | -0.642129 |
| O  | 10.032963  | 0.587905  | -3.068748 |
| Ti | 8.429808   | 1.217774  | -2.333387 |
| Ti | 3.603513   | -2.386607 | -2.582115 |
| O  | 3.580596   | -2.051337 | -0.771397 |
| Ti | 3.828171   | -2.512407 | 1.061811  |
| Ti | 2.185736   | -5.956577 | -2.268166 |
| O  | 3.306376   | -4.536726 | 1.126189  |
| O  | 4.053051   | -7.128449 | 1.661641  |
| O  | 2.010286   | -6.725073 | -0.567360 |
| Ti | 2.318714   | -6.152075 | 1.224853  |
| O  | 3.094677   | -4.290446 | -2.153319 |
| Ti | 8.974757   | -6.283498 | 1.076040  |
| O  | 8.994339   | -7.210502 | -0.575937 |
| Ti | 8.488013   | -5.717909 | -1.706162 |
| O  | 8.433181   | -4.652509 | -0.082558 |
| O  | 6.935963   | -5.845124 | -2.692977 |
| O  | 7.059397   | -6.378168 | 1.608837  |
| O  | 5.778883   | -3.591719 | 1.430583  |
| Ti | 5.282312   | -5.564151 | 1.192742  |
| O  | 5.184152   | -5.617002 | -0.661568 |
| O  | 5.403859   | -3.489448 | -3.164942 |
| Ti | 5.058993   | -5.329405 | -2.523339 |
| O  | 3.766793   | -6.597387 | -3.163916 |
| O  | 4.862361   | -0.967129 | -3.138032 |
| O  | 5.082725   | -0.958982 | 1.161095  |
| Ti | 10.217825  | -3.507384 | 0.859834  |
| O  | 10.255806  | -2.799684 | -0.910016 |
| O  | 11.386263  | -1.972135 | -3.387445 |
| Ti | 10.024091  | -3.112586 | -2.738765 |
| O  | 9.877930   | -5.017380 | -2.763917 |
| O  | 10.646605  | -5.367006 | 1.196280  |
| O  | 8.730949   | -2.582230 | 1.647285  |
| Ti | 6.941846   | -1.911308 | 1.027064  |
| O  | 6.830006   | -2.131537 | -0.876496 |
| O  | 8.357504   | -2.625985 | -3.407032 |
| Ti | 6.702676   | -1.980094 | -2.717823 |
| Ti | -10.489713 | 2.811277  | -1.968837 |
| O  | -11.096778 | 2.248078  | -0.234801 |
| O  | -13.185804 | 2.253188  | 1.557454  |
| Ti | -11.395631 | 2.940479  | 1.646575  |

|    |            |           |           |
|----|------------|-----------|-----------|
| O  | -11.342897 | 4.793848  | 1.566640  |
| O  | -10.466465 | 4.664666  | -2.170650 |
| O  | -8.773079  | 2.322669  | -2.585817 |
| Ti | -7.025277  | 1.675506  | -2.373026 |
| O  | -6.866147  | 1.346657  | -0.555243 |
| O  | -9.330208  | 3.065263  | 1.904611  |
| Ti | -7.575206  | 2.381010  | 1.153199  |
| O  | -5.601578  | 1.435278  | 1.570397  |
| O  | -5.113735  | 0.826866  | -2.879341 |
| Ti | -8.875063  | 5.298927  | -1.348584 |
| O  | -9.479232  | 6.397719  | 0.018937  |
| Ti | -9.419000  | 5.177005  | 1.545914  |
| O  | -8.413832  | 3.908308  | -0.132835 |
| O  | -7.901401  | 6.240492  | 2.293292  |
| O  | -7.515528  | 5.620617  | -2.607585 |
| O  | -5.821036  | 3.304680  | -2.497601 |
| Ti | -5.753351  | 5.223356  | -1.979011 |
| O  | -6.093913  | 6.026406  | -0.308484 |
| O  | -6.254161  | 3.916510  | 1.238979  |
| Ti | -5.974134  | 5.995113  | 1.589166  |
| O  | -4.738700  | 7.506384  | 1.691125  |
| O  | -3.941801  | 4.952878  | 1.783639  |
| O  | -3.927023  | 4.093574  | -0.895730 |
| O  | -4.247988  | 6.099918  | -2.715613 |
| O  | -2.518488  | 6.717424  | -0.175070 |
| Ti | -2.789319  | 5.565374  | -1.602980 |
| Ti | -3.040452  | 6.671200  | 1.683879  |
| Ti | -4.370398  | 3.017247  | 1.045938  |
| O  | -3.821817  | 1.620560  | -0.302399 |
| Ti | -4.029759  | 2.215770  | -2.028628 |
| Ti | -12.573537 | -2.749834 | -1.759488 |
| Ti | -12.849964 | -2.188232 | 1.046615  |
| O  | -12.996175 | -1.499125 | -3.081393 |
| Ti | -12.037003 | 0.154147  | -2.965083 |
| O  | -13.050885 | 0.664998  | -1.432218 |
| O  | -13.939881 | -0.635161 | 1.047258  |
| Ti | -12.876963 | 0.794716  | 0.421017  |
| O  | -11.403870 | -1.951979 | -0.391271 |
| O  | -11.584847 | 1.956147  | -3.265263 |
| O  | -10.393297 | -0.616586 | -3.466453 |
| Ti | -8.812363  | -1.313829 | -2.700769 |
| O  | -13.815688 | -3.057644 | -0.425115 |
| O  | -8.948684  | -0.819098 | -0.944058 |
| O  | -11.250603 | -0.055565 | 1.265978  |
| Ti | -9.512712  | -1.110491 | 0.869385  |
| Ti | -10.282062 | -4.867338 | -2.078584 |
| O  | -11.999865 | -4.333487 | -2.618965 |
| O  | -9.825906  | -3.145364 | 1.145600  |
| O  | -9.023317  | -5.667206 | 1.783146  |
| O  | -10.800500 | -5.550561 | -0.389399 |
| Ti | -10.753628 | -4.820812 | 1.338566  |
| O  | -12.477827 | -3.978701 | 1.887691  |

|    |           |           |           |
|----|-----------|-----------|-----------|
| O  | -9.435212 | -3.190290 | -2.341722 |
| O  | -5.772769 | -5.207449 | -2.995132 |
| O  | -6.088762 | -4.898459 | 1.672151  |
| O  | -7.519129 | -2.090752 | 1.393811  |
| Ti | -7.799542 | -4.081806 | 1.201086  |
| O  | -7.540323 | -4.339772 | -0.639634 |
| O  | -7.091608 | -2.582544 | -3.215808 |
| Ti | -7.414484 | -4.389346 | -2.525521 |
| O  | -8.831530 | -5.688756 | -2.937300 |
| O  | -7.448219 | -0.026607 | -3.385720 |
| O  | -8.288818 | 0.454148  | 1.218265  |
| O  | -4.636491 | -1.280039 | 1.497923  |
| Ti | -6.331695 | -0.408447 | 0.827600  |
| O  | -5.886097 | -1.257046 | -0.911390 |
| O  | -4.165700 | -1.663168 | -3.626353 |
| Ti | -5.734254 | -1.119181 | -2.741694 |
| O  | -2.512333 | 2.324170  | -3.100556 |
| Ti | -0.846506 | 1.511457  | -2.616853 |
| O  | -0.830399 | 1.599481  | -0.790487 |
| O  | -2.539753 | 2.768196  | 1.792094  |
| Ti | -1.020555 | 1.728892  | 1.154763  |
| O  | -1.054077 | 6.329610  | 2.124807  |
| O  | -1.236566 | 5.213766  | -2.537121 |
| O  | 0.470912  | 3.016176  | -3.020208 |
| Ti | 0.670978  | 4.848203  | -2.254150 |
| O  | 0.506095  | 5.145468  | -0.435242 |
| O  | 0.226075  | 3.305309  | 1.272070  |
| Ti | 0.548548  | 5.394474  | 1.465891  |
| O  | 1.859571  | 6.829410  | 1.549764  |
| O  | 2.001467  | 6.083184  | -2.897039 |
| Ti | -2.581754 | -1.896726 | -2.639424 |
| O  | -2.734691 | -1.568783 | -0.843309 |
| Ti | -2.826490 | -1.798791 | 1.056247  |
| Ti | -4.065889 | -5.464529 | -2.226201 |
| O  | -3.266359 | -3.853864 | 1.050569  |
| O  | -4.419463 | -6.128390 | -0.507080 |
| Ti | -4.239494 | -5.456990 | 1.257947  |
| O  | -3.167644 | -3.808296 | -2.281303 |
| O  | -1.387964 | -0.377160 | -3.153233 |
| O  | -1.557665 | -0.252894 | 1.174475  |
| O  | 2.573098  | 0.099447  | 7.918063  |
| O  | 2.730024  | -0.227625 | 3.675477  |
| O  | 4.343061  | 3.659840  | 7.922795  |
| O  | 4.393513  | 3.381389  | 4.092093  |
| O  | 5.749842  | 5.576038  | 5.789786  |
| Ti | 5.398584  | 4.991014  | 4.046316  |
| Ti | 5.323632  | 5.340777  | 7.661772  |
| Ti | 3.657468  | 1.780774  | 7.519243  |
| O  | 3.853937  | 1.417460  | 5.723156  |
| Ti | 3.897656  | 1.360031  | 3.810534  |
| O  | -0.989702 | -7.054232 | 8.020259  |
| O  | 2.217262  | -6.756390 | 3.309357  |

|    |           |           |          |
|----|-----------|-----------|----------|
| O  | 2.112040  | -6.282200 | 7.938147 |
| O  | 0.833645  | -3.538926 | 7.877547 |
| Ti | 0.292954  | -5.510047 | 7.538891 |
| O  | 0.571095  | -5.641848 | 5.714729 |
| O  | 0.971191  | -3.856958 | 3.684367 |
| Ti | 0.518044  | -5.877089 | 3.832012 |
| O  | -0.811605 | -7.320284 | 3.836662 |
| O  | 3.699063  | -2.537702 | 7.959853 |
| Ti | 1.918179  | -1.814369 | 7.464689 |
| O  | 2.110435  | -2.074442 | 5.639104 |
| O  | 3.929122  | -2.816793 | 3.220007 |
| Ti | 2.134753  | -2.232918 | 3.743930 |
| O  | 5.671096  | 0.755462  | 3.307091 |
| Ti | 7.434346  | 0.034236  | 3.782056 |
| O  | 7.290251  | 0.332136  | 5.607369 |
| O  | 5.500545  | 1.188897  | 8.032285 |
| Ti | 7.236022  | 0.469764  | 7.510444 |
| O  | 9.161769  | -0.617074 | 7.887748 |
| O  | 9.310155  | -0.985324 | 3.857389 |
| O  | 7.293584  | 4.934365  | 8.119838 |
| O  | 7.147687  | 4.210108  | 3.456490 |
| O  | 8.708271  | 1.595961  | 3.318461 |
| Ti | 8.934363  | 3.532794  | 3.879760 |
| O  | 8.809622  | 3.624884  | 5.682212 |
| O  | 8.538608  | 1.969994  | 7.612037 |
| Ti | 8.973467  | 4.009725  | 7.587408 |
| O  | 10.452711 | 5.225796  | 7.399048 |
| O  | 11.018780 | 2.748397  | 7.943727 |
| O  | 11.009368 | 2.553752  | 3.865173 |
| O  | 10.163616 | 5.179451  | 3.509011 |
| O  | 12.470192 | 4.886329  | 5.510047 |
| Ti | 11.887431 | 4.265349  | 3.888949 |
| O  | 13.585276 | 3.151049  | 3.263185 |
| Ti | 12.150685 | 4.307444  | 7.413260 |
| O  | 14.096595 | 4.217010  | 8.232694 |
| Ti | 14.854689 | 2.454300  | 7.595573 |
| Ti | 14.152063 | 2.185013  | 4.838259 |
| O  | 14.882244 | 0.614161  | 7.915422 |
| Ti | 13.847165 | -1.013547 | 7.857679 |
| O  | 14.468232 | -1.606565 | 6.153598 |
| O  | 14.278878 | 0.440122  | 4.395261 |
| Ti | 13.710014 | -1.458614 | 4.461960 |
| O  | 13.103941 | 2.531404  | 6.457951 |
| O  | 13.315189 | -3.047876 | 7.970952 |
| O  | 12.143164 | -0.120035 | 7.993888 |
| Ti | 10.425626 | 0.892007  | 7.495850 |
| O  | 15.693283 | 2.669650  | 5.909303 |
| O  | 10.820392 | 0.589733  | 5.700007 |
| O  | 12.163618 | -0.674805 | 3.420532 |
| Ti | 10.590078 | 0.511701  | 3.837367 |
| Ti | 5.675821  | -3.492580 | 3.778117 |
| O  | 5.467806  | -3.311984 | 5.583728 |

|    |            |           |          |
|----|------------|-----------|----------|
| Ti | 5.466750   | -3.161645 | 7.485380 |
| Ti | 4.159381   | -7.160408 | 3.809744 |
| O  | 5.012081   | -5.232278 | 7.300721 |
| O  | 5.736689   | -7.733820 | 7.896683 |
| O  | 3.736996   | -7.416027 | 5.656670 |
| Ti | 3.947709   | -6.807675 | 7.440040 |
| O  | 5.091851   | -5.442241 | 3.514508 |
| Ti | 10.777073  | -6.555230 | 7.363997 |
| O  | 10.950161  | -7.442293 | 5.704000 |
| Ti | 10.600349  | -6.038878 | 4.374547 |
| O  | 10.374517  | -4.951762 | 6.045763 |
| O  | 9.202970   | -6.761064 | 3.156442 |
| O  | 8.867076   | -6.720596 | 7.856175 |
| O  | 7.427090   | -4.213922 | 7.846578 |
| Ti | 6.951378   | -6.173522 | 7.423840 |
| O  | 7.393265   | -6.474911 | 5.618873 |
| O  | 7.528869   | -4.512963 | 3.658914 |
| Ti | 7.164250   | -6.530172 | 3.757117 |
| O  | 5.885233   | -7.984054 | 3.748380 |
| O  | 6.824045   | -1.896323 | 3.361219 |
| O  | 6.632240   | -1.562094 | 7.559833 |
| Ti | 11.778524  | -3.676438 | 6.883045 |
| O  | 12.174147  | -2.851071 | 5.159929 |
| O  | 14.088795  | -2.894680 | 3.267662 |
| Ti | 12.360676  | -3.743331 | 3.301586 |
| O  | 12.377659  | -5.585336 | 3.763181 |
| O  | 12.384470  | -5.451924 | 7.710647 |
| O  | 10.405136  | -3.065653 | 8.057248 |
| Ti | 8.496707   | -2.508164 | 7.517886 |
| O  | 8.687858   | -2.749330 | 5.696331 |
| O  | 10.316278  | -4.011502 | 3.359695 |
| Ti | 8.746066   | -2.917748 | 3.806065 |
| Ti | -9.178763  | 2.804428  | 4.245627 |
| O  | -9.673071  | 1.929370  | 5.976223 |
| O  | -11.286507 | 1.719481  | 8.107463 |
| Ti | -9.557501  | 2.606428  | 7.945986 |
| O  | -9.621066  | 4.510296  | 7.762030 |
| O  | -9.507509  | 4.792723  | 3.694953 |
| O  | -7.576956  | 2.130853  | 3.374950 |
| Ti | -5.736168  | 1.454076  | 3.782790 |
| O  | -5.697708  | 1.555192  | 5.624012 |
| O  | -7.539420  | 2.867551  | 7.640684 |
| Ti | -5.947656  | 1.788458  | 7.513892 |
| O  | -3.962707  | 0.771805  | 7.916363 |
| O  | -3.819644  | 0.482166  | 3.657013 |
| Ti | -7.798265  | 5.605990  | 4.330762 |
| O  | -7.961679  | 6.465921  | 5.964152 |
| Ti | -7.841025  | 4.914937  | 7.190725 |
| O  | -7.737271  | 3.911932  | 5.361355 |
| O  | -6.427481  | 5.604208  | 8.388893 |
| O  | -5.948028  | 5.614531  | 3.708320 |
| O  | -4.561940  | 3.102350  | 3.463241 |



|    |            |           |          |
|----|------------|-----------|----------|
| Ti | -4.094936  | 4.977784  | 4.138459 |
| O  | -4.545517  | 5.245652  | 5.931922 |
| O  | -4.730518  | 3.372860  | 7.755206 |
| Ti | -4.388443  | 5.434028  | 7.810738 |
| O  | -3.116016  | 6.896767  | 7.831644 |
| O  | -2.304286  | 4.371054  | 7.976460 |
| O  | -2.166624  | 4.089368  | 4.294115 |
| O  | -2.922340  | 6.616777  | 3.767917 |
| O  | -0.879817  | 6.318929  | 5.951745 |
| Ti | -1.134136  | 5.687033  | 4.202366 |
| Ti | -1.382095  | 6.076173  | 7.799660 |
| Ti | -2.877379  | 2.450891  | 7.539211 |
| O  | -2.580753  | 2.073581  | 5.768820 |
| Ti | -2.666681  | 2.057750  | 3.855884 |
| Ti | -11.880127 | -3.533108 | 3.965393 |
| Ti | -11.621980 | -3.023139 | 6.717105 |
| O  | -12.267586 | -1.782598 | 3.067174 |
| Ti | -11.099919 | -0.127298 | 3.394268 |
| O  | -11.740773 | 0.196294  | 5.109986 |
| O  | -11.992777 | -1.341108 | 7.290046 |
| Ti | -11.029652 | 0.348822  | 6.849615 |
| O  | -10.482861 | -2.943023 | 5.154932 |
| O  | -10.855734 | 1.881445  | 3.358274 |
| O  | -9.430765  | -1.022612 | 3.131473 |
| Ti | -7.651041  | -1.900845 | 3.684174 |
| O  | -12.956995 | -3.742767 | 5.484643 |
| O  | -7.851188  | -1.547339 | 5.492462 |
| O  | -9.446682  | -0.541849 | 7.650808 |
| Ti | -7.785556  | -1.662347 | 7.375891 |
| Ti | -9.017084  | -5.576505 | 3.934619 |
| O  | -10.980224 | -5.238812 | 3.414716 |
| O  | -8.352643  | -3.621312 | 7.445751 |
| O  | -7.619707  | -6.173723 | 8.072786 |
| O  | -9.592472  | -5.898208 | 5.772559 |
| Ti | -9.286461  | -5.298061 | 7.492407 |
| O  | -11.058432 | -4.286790 | 8.044947 |
| O  | -8.155527  | -3.868672 | 3.516228 |
| O  | -4.392223  | -5.969069 | 3.367453 |
| O  | -4.559289  | -5.542906 | 7.986901 |
| O  | -5.904564  | -2.706148 | 7.865050 |
| Ti | -6.299203  | -4.703892 | 7.589075 |
| O  | -6.077561  | -4.730837 | 5.753896 |
| O  | -5.740041  | -3.026146 | 3.654254 |
| Ti | -6.040484  | -5.021300 | 3.878672 |
| O  | -7.385743  | -6.464260 | 3.955272 |
| O  | -6.379923  | -0.425315 | 3.255084 |
| O  | -6.506467  | -0.147796 | 7.495537 |
| O  | -2.922403  | -1.934581 | 7.948113 |
| Ti | -4.632658  | -1.124981 | 7.400777 |
| O  | -4.455973  | -1.427349 | 5.590423 |
| O  | -2.712926  | -2.191654 | 3.195096 |
| Ti | -4.477728  | -1.477658 | 3.677560 |

|    |           |           |           |
|----|-----------|-----------|-----------|
| O  | -0.939390 | 1.356014  | 3.301701  |
| Ti | 0.838963  | 0.703084  | 3.845553  |
| O  | 0.683969  | 0.948497  | 5.673082  |
| O  | -1.045801 | 1.967133  | 8.128371  |
| Ti | 0.634457  | 1.146298  | 7.572718  |
| O  | 0.587820  | 5.724270  | 8.302135  |
| O  | 0.606688  | 4.975582  | 3.585283  |
| O  | 1.956314  | 2.387088  | 3.448570  |
| Ti | 2.432677  | 4.314653  | 4.018850  |
| O  | 2.191825  | 4.504938  | 5.830818  |
| O  | 1.802577  | 2.770755  | 7.719043  |
| Ti | 2.264813  | 4.834565  | 7.723842  |
| O  | 3.639470  | 6.221952  | 7.716092  |
| O  | 3.628951  | 5.918475  | 3.602193  |
| Ti | -0.921805 | -2.810743 | 3.793430  |
| O  | -1.092635 | -2.568346 | 5.604477  |
| Ti | -1.105232 | -2.490970 | 7.512418  |
| Ti | -2.467121 | -6.432775 | 3.888061  |
| O  | -1.658364 | -4.516693 | 7.434790  |
| O  | -2.935668 | -6.657279 | 5.733039  |
| Ti | -2.711596 | -6.091240 | 7.528413  |
| O  | -1.534902 | -4.733609 | 3.531188  |
| O  | 0.216964  | -1.204280 | 3.377501  |
| O  | 0.045356  | -0.873702 | 7.592210  |
| O  | 4.261475  | -0.501363 | 14.294252 |
| O  | 4.377604  | -0.834834 | 10.065384 |
| O  | 6.039387  | 3.046710  | 14.216227 |
| O  | 6.101936  | 2.798369  | 10.312838 |
| O  | 7.436500  | 4.945339  | 12.031173 |
| Ti | 7.154461  | 4.376516  | 10.252093 |
| Ti | 7.035178  | 4.719256  | 13.900213 |
| Ti | 5.367726  | 1.157034  | 13.881646 |
| O  | 5.513137  | 0.867985  | 12.070426 |
| Ti | 5.528777  | 0.774790  | 10.167226 |
| O  | 0.700719  | -7.652576 | 14.280794 |
| O  | 3.868092  | -7.411836 | 9.541082  |
| O  | 3.806534  | -6.842760 | 14.199959 |
| O  | 2.523244  | -4.140909 | 14.229263 |
| Ti | 1.979172  | -6.092931 | 13.804730 |
| O  | 2.221030  | -6.262588 | 11.984547 |
| O  | 2.622077  | -4.488563 | 10.018910 |
| Ti | 2.152552  | -6.540797 | 10.091141 |
| O  | 0.771122  | -7.918716 | 10.100895 |
| O  | 5.407005  | -3.108078 | 14.349553 |
| Ti | 3.622335  | -2.422718 | 13.845274 |
| O  | 3.773209  | -2.655724 | 12.013442 |
| O  | 5.490608  | -3.627875 | 9.575262  |
| Ti | 3.778121  | -2.854727 | 10.125054 |
| O  | 7.318917  | 0.173470  | 9.669069  |
| Ti | 9.061312  | -0.531005 | 10.242330 |
| O  | 8.863474  | -0.193001 | 12.038726 |
| O  | 7.177546  | 0.517664  | 14.420280 |

|    |           |           |           |
|----|-----------|-----------|-----------|
| Ti | 8.950196  | -0.190000 | 13.944285 |
| O  | 10.851448 | -1.265985 | 14.328011 |
| O  | 10.929002 | -1.495528 | 10.144747 |
| O  | 8.980202  | 4.279705  | 14.397118 |
| O  | 8.993167  | 3.823744  | 9.744305  |
| O  | 10.332203 | 1.046866  | 9.790027  |
| Ti | 10.760922 | 3.031079  | 10.168281 |
| O  | 10.566402 | 3.082915  | 11.982698 |
| O  | 10.251762 | 1.328335  | 13.985292 |
| Ti | 10.675542 | 3.343519  | 13.889817 |
| O  | 12.165488 | 4.564578  | 13.752004 |
| O  | 12.721299 | 2.083454  | 14.298164 |
| O  | 12.797808 | 1.988718  | 10.254961 |
| O  | 12.044824 | 4.528238  | 9.638593  |
| O  | 14.210392 | 4.299971  | 11.884871 |
| Ti | 13.735732 | 3.691351  | 10.224396 |
| O  | 15.456463 | 2.558492  | 9.671454  |
| Ti | 13.857791 | 3.653413  | 13.745529 |
| O  | 15.781489 | 3.524898  | 14.580863 |
| Ti | 16.508460 | 1.746751  | 13.938646 |
| Ti | 15.825366 | 1.406507  | 11.192260 |
| O  | 16.461313 | -0.064792 | 14.360005 |
| Ti | 15.494436 | -1.753952 | 14.278606 |
| O  | 16.041544 | -2.332451 | 12.576503 |
| O  | 15.868926 | -0.350050 | 10.834747 |
| Ti | 15.202327 | -2.296826 | 10.873857 |
| O  | 14.775308 | 1.859216  | 12.795364 |
| O  | 15.008038 | -3.774319 | 14.537000 |
| O  | 13.796125 | -0.860082 | 14.443201 |
| Ti | 12.143410 | 0.209388  | 13.903929 |
| O  | 17.379006 | 1.869542  | 12.278960 |
| O  | 12.409784 | -0.053711 | 12.091069 |
| O  | 13.788088 | -1.215197 | 9.897782  |
| Ti | 12.219502 | 0.014476  | 10.215939 |
| Ti | 7.313034  | -4.118771 | 10.175509 |
| O  | 7.018359  | -3.836985 | 11.955487 |
| Ti | 7.179717  | -3.762381 | 13.853553 |
| Ti | 5.828379  | -7.767404 | 10.035355 |
| O  | 6.706914  | -5.831348 | 13.581431 |
| O  | 7.415272  | -8.346117 | 14.139008 |
| O  | 5.422157  | -8.005192 | 11.892162 |
| Ti | 5.636826  | -7.400064 | 13.679432 |
| O  | 6.764551  | -6.062247 | 9.783452  |
| Ti | 12.391109 | -7.292118 | 13.622935 |
| O  | 12.491132 | -8.194426 | 11.976309 |
| Ti | 12.187045 | -6.705122 | 10.739129 |
| O  | 11.928657 | -5.667339 | 12.481725 |
| O  | 10.881178 | -7.311120 | 9.363209  |
| O  | 10.469448 | -7.478384 | 14.169194 |
| O  | 9.117433  | -4.851740 | 14.173589 |
| Ti | 8.645630  | -6.788002 | 13.664567 |
| O  | 9.042862  | -7.036094 | 11.847885 |

|    |            |           |           |
|----|------------|-----------|-----------|
| O  | 9.160233   | -5.050466 | 10.011679 |
| Ti | 8.845406   | -7.100219 | 9.961438  |
| O  | 7.585580   | -8.562904 | 9.917773  |
| O  | 8.383987   | -2.443403 | 9.776624  |
| O  | 8.346654   | -2.193869 | 14.020577 |
| Ti | 13.548357  | -4.512644 | 13.288856 |
| O  | 13.844617  | -3.701434 | 11.570598 |
| O  | 15.479385  | -3.616350 | 9.542952  |
| Ti | 13.754922  | -4.533759 | 9.385957  |
| O  | 13.887990  | -6.376792 | 9.937903  |
| O  | 14.024110  | -6.314998 | 13.891770 |
| O  | 12.123982  | -3.764436 | 14.388448 |
| Ti | 10.259277  | -3.179540 | 13.892792 |
| O  | 10.171003  | -3.126974 | 12.060743 |
| O  | 11.875743  | -4.634799 | 10.127496 |
| Ti | 10.378857  | -3.440604 | 10.191346 |
| Ti | -7.426163  | 2.200899  | 10.776808 |
| O  | -7.722615  | 1.389666  | 12.494664 |
| O  | -9.357333  | 1.305387  | 14.522980 |
| Ti | -7.632581  | 2.223537  | 14.679475 |
| O  | -7.766141  | 4.065270  | 14.127177 |
| O  | -7.902619  | 4.003968  | 10.173971 |
| O  | -6.002820  | 1.452827  | 9.676218  |
| Ti | -4.138596  | 0.867329  | 10.172839 |
| O  | -4.050546  | 0.814132  | 12.004757 |
| O  | -5.753759  | 2.324014  | 13.937561 |
| Ti | -4.258141  | 1.127811  | 13.874175 |
| O  | -2.263108  | 0.130268  | 14.289058 |
| O  | -2.226193  | -0.118423 | 10.045072 |
| Ti | -6.269268  | 4.981733  | 10.442087 |
| O  | -6.369148  | 5.883352  | 12.088927 |
| Ti | -6.065392  | 4.394165  | 13.325773 |
| O  | -5.806755  | 3.356139  | 11.583609 |
| O  | -4.759517  | 4.999787  | 14.702166 |
| O  | -4.347932  | 5.166901  | 9.895478  |
| O  | -2.996676  | 2.539372  | 9.891298  |
| Ti | -2.524725  | 4.476171  | 10.400511 |
| O  | -2.922379  | 4.723827  | 12.217286 |
| O  | -3.039168  | 2.737822  | 14.053239 |
| Ti | -2.723884  | 4.787621  | 14.103788 |
| O  | -1.463822  | 6.250222  | 14.147417 |
| O  | -0.643412  | 3.749281  | 14.282308 |
| O  | -0.586253  | 3.519072  | 10.484482 |
| O  | -1.294237  | 6.033807  | 9.925866  |
| O  | 0.699138   | 5.692229  | 12.173263 |
| Ti | 0.484126   | 5.087712  | 10.385854 |
| Ti | 0.292642   | 5.454370  | 14.030153 |
| Ti | -1.192339  | 1.806071  | 13.890218 |
| O  | -0.897822  | 1.524369  | 12.110218 |
| Ti | -1.058961  | 1.450147  | 10.212079 |
| Ti | -10.387540 | -4.057467 | 10.126486 |
| Ti | -9.704464  | -3.717632 | 12.872977 |

|    |            |           |           |
|----|------------|-----------|-----------|
| O  | -10.339683 | -2.245804 | 9.705076  |
| Ti | -9.372522  | -0.556962 | 9.787203  |
| O  | -9.920071  | 0.021423  | 11.489464 |
| O  | -9.747423  | -1.961090 | 13.230930 |
| Ti | -9.080611  | -0.014204 | 13.192026 |
| O  | -8.654764  | -4.171056 | 11.270243 |
| O  | -8.886169  | 1.465731  | 9.528864  |
| O  | -7.674863  | -1.451064 | 9.622345  |
| Ti | -6.022637  | -2.521699 | 10.161603 |
| O  | -11.258644 | -4.179416 | 11.787074 |
| O  | -6.288628  | -2.258945 | 11.974540 |
| O  | -7.666595  | -1.096497 | 14.167711 |
| Ti | -6.098623  | -2.326977 | 13.849715 |
| Ti | -7.737526  | -5.965313 | 10.319750 |
| O  | -9.661308  | -5.836005 | 9.484571  |
| O  | -6.677200  | -4.300903 | 13.810060 |
| O  | -5.924476  | -6.840980 | 14.425441 |
| O  | -8.090449  | -6.612456 | 12.179908 |
| Ti | -7.615190  | -6.003396 | 13.840135 |
| O  | -9.336307  | -4.870536 | 14.393234 |
| O  | -6.600941  | -4.395562 | 9.767382  |
| O  | -2.859498  | -6.592058 | 9.668422  |
| O  | -2.872484  | -6.136599 | 14.320894 |
| O  | -4.211629  | -3.359716 | 14.275484 |
| Ti | -4.639888  | -5.343766 | 13.896927 |
| O  | -4.445718  | -5.395358 | 12.082552 |
| O  | -4.131073  | -3.640502 | 10.079980 |
| Ti | -4.554942  | -5.655710 | 10.175436 |
| O  | -6.044841  | -6.876563 | 10.312845 |
| O  | -4.730488  | -1.046126 | 9.737308  |
| O  | -4.808165  | -0.817097 | 13.920928 |
| O  | -1.198436  | -2.486629 | 14.397563 |
| Ti | -2.940623  | -1.781862 | 13.823357 |
| O  | -2.742407  | -2.119340 | 12.027094 |
| O  | -1.056893  | -2.830485 | 9.645177  |
| Ti | -2.829307  | -2.122230 | 10.121245 |
| O  | 0.713575   | 0.795509  | 9.715695  |
| Ti | 2.497850   | 0.109544  | 10.220167 |
| O  | 2.346883   | 0.342166  | 12.052066 |
| O  | 0.629964   | 1.314552  | 14.490596 |
| Ti | 2.342325   | 0.541545  | 13.940463 |
| O  | 2.252891   | 5.099085  | 14.524591 |
| O  | 2.314359   | 4.530073  | 9.865008  |
| O  | 3.596992   | 1.827819  | 9.836325  |
| Ti | 4.141474   | 3.779956  | 10.260644 |
| O  | 3.898954   | 3.949473  | 12.080809 |
| O  | 3.498388   | 2.175411  | 14.046614 |
| Ti | 3.968068   | 4.227732  | 13.974045 |
| O  | 5.349606   | 5.605910  | 13.963837 |
| O  | 5.419736   | 5.339577  | 9.784419  |
| Ti | 0.752770   | -3.470167 | 10.184109 |
| O  | 0.606781   | -3.180934 | 11.995238 |

|    |           |           |           |
|----|-----------|-----------|-----------|
| Ti | 0.591479  | -3.087954 | 13.898867 |
| Ti | -0.914571 | -7.032110 | 10.165003 |
| O  | 0.018647  | -5.111111 | 13.752740 |
| O  | -1.315933 | -7.258306 | 12.033911 |
| Ti | -1.033769 | -6.689473 | 13.813173 |
| O  | 0.081184  | -5.359676 | 9.848810  |
| O  | 1.859055  | -1.811806 | 9.771283  |
| O  | 1.742944  | -1.478346 | 14.000175 |
| O  | 5.903125  | -1.108731 | 20.687788 |
| O  | 6.075400  | -1.439368 | 16.473053 |
| O  | 7.656060  | 2.420800  | 20.533961 |
| O  | 7.779351  | 2.203643  | 16.630470 |
| O  | 9.055739  | 4.344673  | 18.332352 |
| Ti | 8.832424  | 3.778904  | 16.536902 |
| Ti | 8.586792  | 4.119945  | 20.177333 |
| Ti | 7.041917  | 0.500052  | 20.272043 |
| O  | 7.212577  | 0.255652  | 18.460888 |
| Ti | 7.225918  | 0.178307  | 16.553043 |
| O  | 2.492251  | -8.231798 | 20.462019 |
| O  | 5.533422  | -8.036333 | 15.763188 |
| O  | 5.514860  | -7.287480 | 20.478546 |
| O  | 4.163050  | -4.699616 | 20.617350 |
| Ti | 3.688344  | -6.627460 | 20.046141 |
| O  | 3.928716  | -6.817595 | 18.234127 |
| O  | 4.317962  | -5.083541 | 16.346135 |
| Ti | 3.856132  | -7.147560 | 16.341189 |
| O  | 2.481632  | -8.534825 | 16.348605 |
| O  | 7.059607  | -3.668061 | 20.763432 |
| Ti | 5.280934  | -3.015864 | 20.219970 |
| O  | 5.435824  | -3.261853 | 18.392244 |
| O  | 7.167053  | -4.279347 | 15.937326 |
| Ti | 5.486041  | -3.459255 | 16.492581 |
| O  | 9.043455  | -0.377131 | 16.117455 |
| Ti | 10.753433 | -1.187037 | 16.665249 |
| O  | 10.574609 | -0.886061 | 18.475516 |
| O  | 8.833056  | -0.121346 | 20.870451 |
| Ti | 10.597788 | -0.835195 | 20.388227 |
| O  | 12.500249 | -1.887116 | 20.809562 |
| O  | 12.627208 | -2.164321 | 16.569434 |
| O  | 10.512311 | 3.656866  | 20.698176 |
| O  | 10.680192 | 3.230932  | 16.078175 |
| O  | 12.025078 | 0.393927  | 16.200799 |
| Ti | 12.419830 | 2.391865  | 16.476440 |
| O  | 12.197443 | 2.418222  | 18.311502 |
| O  | 11.859625 | 0.713749  | 20.411209 |
| Ti | 12.160077 | 2.708400  | 20.186812 |
| O  | 13.505435 | 4.151535  | 20.110095 |
| O  | 14.275899 | 1.556451  | 20.549912 |
| O  | 14.472843 | 1.309679  | 16.620075 |
| O  | 13.740010 | 3.862230  | 15.992831 |
| O  | 15.712351 | 3.586406  | 18.293018 |
| Ti | 15.406541 | 2.986595  | 16.573243 |

|    |           |           |           |
|----|-----------|-----------|-----------|
| O  | 17.178244 | 1.975408  | 16.020454 |
| Ti | 15.136906 | 3.264503  | 20.131074 |
| O  | 17.100012 | 2.927729  | 20.651587 |
| Ti | 18.000547 | 1.222646  | 20.101111 |
| Ti | 17.742793 | 0.712440  | 17.349041 |
| O  | 18.388414 | -0.527866 | 20.999755 |
| Ti | 17.221140 | -2.183074 | 20.671610 |
| O  | 17.862353 | -2.506028 | 18.955885 |
| O  | 18.114282 | -0.968993 | 16.775836 |
| Ti | 17.151823 | -2.658955 | 17.216162 |
| O  | 16.604217 | 0.631556  | 18.911443 |
| O  | 16.977914 | -4.192153 | 20.706273 |
| O  | 15.551218 | -1.288769 | 20.933940 |
| Ti | 13.771368 | -0.411443 | 20.381235 |
| O  | 19.077553 | 1.433007  | 18.581672 |
| O  | 13.971573 | -0.764229 | 18.572945 |
| O  | 15.568095 | -1.768864 | 16.414945 |
| Ti | 13.906303 | -0.649358 | 16.689486 |
| Ti | 8.998509  | -4.763446 | 16.526207 |
| O  | 8.701038  | -4.385908 | 18.296406 |
| Ti | 8.786647  | -4.370371 | 20.209566 |
| Ti | 7.503594  | -8.388874 | 16.264887 |
| O  | 8.287707  | -6.401847 | 19.770259 |
| O  | 9.044425  | -8.928994 | 20.295851 |
| O  | 7.000762  | -8.631840 | 18.112598 |
| Ti | 7.255544  | -7.999558 | 19.861658 |
| O  | 8.425861  | -6.683611 | 16.088947 |
| Ti | 13.921508 | -7.916614 | 19.733565 |
| O  | 14.085204 | -8.776457 | 18.100076 |
| Ti | 13.963543 | -7.225372 | 16.873416 |
| O  | 13.859456 | -6.223058 | 18.702408 |
| O  | 12.549514 | -7.915069 | 15.676138 |
| O  | 12.070563 | -7.925088 | 20.355140 |
| O  | 10.682150 | -5.414305 | 20.601827 |
| Ti | 10.216653 | -7.290051 | 19.925867 |
| O  | 10.666638 | -7.558666 | 18.132241 |
| O  | 10.851415 | -5.685582 | 16.309353 |
| Ti | 10.510095 | -7.746254 | 16.253477 |
| O  | 9.237834  | -9.209258 | 16.232287 |
| O  | 10.083049 | -3.084029 | 16.148769 |
| O  | 9.939460  | -2.795124 | 20.409202 |
| Ti | 15.300677 | -5.115088 | 19.819623 |
| O  | 15.795422 | -4.240463 | 18.089004 |
| O  | 17.408669 | -4.029310 | 15.957830 |
| Ti | 15.679988 | -4.916593 | 16.119876 |
| O  | 15.743817 | -6.820851 | 16.302935 |
| O  | 15.630302 | -7.103101 | 20.369315 |
| O  | 13.698230 | -4.442593 | 20.689693 |
| Ti | 11.856884 | -3.766537 | 20.281878 |
| O  | 11.817483 | -3.868477 | 18.440619 |
| O  | 13.661811 | -5.177913 | 16.424946 |
| Ti | 12.068677 | -4.099754 | 16.550785 |

|    |           |           |           |
|----|-----------|-----------|-----------|
| Ti | -5.656547 | 1.365286  | 17.182698 |
| O  | -6.053392 | 0.540026  | 18.905182 |
| O  | -7.968511 | 0.584295  | 20.796740 |
| Ti | -6.240176 | 1.432962  | 20.763118 |
| O  | -6.256771 | 3.274881  | 20.301191 |
| O  | -6.262625 | 3.140814  | 16.354406 |
| O  | -4.284279 | 0.753328  | 16.007871 |
| Ti | -2.375888 | 0.195155  | 16.547623 |
| O  | -2.568231 | 0.437316  | 18.368885 |
| O  | -4.195359 | 1.700815  | 20.705935 |
| Ti | -2.626738 | 0.605220  | 20.259256 |
| O  | -0.705454 | -0.418403 | 20.704979 |
| O  | -0.511860 | -0.751377 | 16.506619 |
| Ti | -4.655218 | 4.244531  | 16.701321 |
| O  | -4.827941 | 5.131404  | 18.361576 |
| Ti | -4.478599 | 3.727391  | 19.690836 |
| O  | -4.252815 | 2.640700  | 18.019627 |
| O  | -3.081365 | 4.450211  | 20.909191 |
| O  | -2.745599 | 4.408588  | 16.208908 |
| O  | -1.306262 | 1.900749  | 16.218944 |
| Ti | -0.830028 | 3.860360  | 16.641689 |
| O  | -1.272826 | 4.161467  | 18.446334 |
| O  | -1.409001 | 2.199129  | 20.406347 |
| Ti | -1.043291 | 4.216268  | 20.308079 |
| O  | 0.235889  | 5.670285  | 20.316693 |
| O  | 1.028456  | 3.127739  | 20.550612 |
| O  | 1.108931  | 2.918847  | 16.765462 |
| O  | 0.384661  | 5.420661  | 16.168786 |
| O  | 2.384323  | 5.101828  | 18.409046 |
| Ti | 2.173376  | 4.494409  | 16.625721 |
| Ti | 1.961121  | 4.845974  | 20.256105 |
| Ti | 0.443152  | 1.178007  | 20.287799 |
| O  | 0.651217  | 0.997220  | 18.482081 |
| Ti | 0.654087  | 0.848525  | 16.580542 |
| Ti | -8.734102 | -4.765966 | 16.468298 |
| Ti | -8.030545 | -4.496596 | 19.225286 |
| O  | -8.760069 | -2.925926 | 16.149437 |
| Ti | -7.725330 | -1.297464 | 16.207750 |
| O  | -8.348698 | -0.704473 | 17.911209 |
| O  | -8.156412 | -2.751881 | 19.669182 |
| Ti | -7.589531 | -0.851949 | 19.602590 |
| O  | -6.982866 | -4.844999 | 17.606345 |
| O  | -7.193301 | 0.738745  | 16.094592 |
| O  | -6.021930 | -2.191931 | 16.071974 |
| Ti | -4.305170 | -3.205218 | 16.570227 |
| O  | -9.572470 | -4.980447 | 18.154918 |
| O  | -4.700749 | -2.905884 | 18.366346 |
| O  | -6.043264 | -1.635047 | 20.644423 |
| Ti | -4.471203 | -2.824443 | 20.229079 |
| Ti | -6.030259 | -6.620511 | 16.650465 |
| O  | -7.976295 | -6.529306 | 15.831493 |
| O  | -4.890807 | -4.866916 | 20.204090 |



|    |           |           |           |
|----|-----------|-----------|-----------|
| O  | -4.042071 | -7.494830 | 20.553241 |
| O  | -6.349421 | -7.200510 | 18.553323 |
| Ti | -5.765654 | -6.580360 | 20.174351 |
| O  | -7.464039 | -5.464467 | 20.799725 |
| O  | -4.898571 | -5.061213 | 16.120794 |
| O  | -1.172783 | -7.246585 | 15.945863 |
| O  | -1.026438 | -6.522995 | 20.607838 |
| O  | -2.591313 | -3.909718 | 20.750224 |
| Ti | -2.813334 | -5.845948 | 20.186424 |
| O  | -2.692117 | -5.936786 | 18.383613 |
| O  | -2.418076 | -4.283141 | 16.453493 |
| Ti | -2.852913 | -6.322479 | 16.478096 |
| O  | -4.332024 | -7.538782 | 16.665077 |
| O  | -3.041394 | -1.695983 | 16.178897 |
| O  | -3.190620 | -1.327833 | 20.205812 |
| O  | 0.447736  | -3.069403 | 20.758466 |
| Ti | -1.316404 | -2.349358 | 20.285338 |
| O  | -1.171587 | -2.648412 | 18.459811 |
| O  | 0.620171  | -3.501420 | 16.033948 |
| Ti | -1.115567 | -2.782931 | 16.556726 |
| O  | 2.421682  | 0.224915  | 16.105635 |
| Ti | 4.202359  | -0.498549 | 16.600802 |
| O  | 4.009807  | -0.238802 | 18.426285 |
| O  | 2.190418  | 0.502790  | 20.845163 |
| Ti | 3.985165  | -0.079896 | 20.321414 |
| O  | 3.903218  | 4.443082  | 20.756314 |
| O  | 4.008977  | 3.969070  | 16.127095 |
| O  | 5.286983  | 1.225827  | 16.187904 |
| Ti | 5.828096  | 3.196890  | 16.526382 |
| O  | 5.549615  | 3.328784  | 18.350362 |
| O  | 5.148651  | 1.544057  | 20.381086 |
| Ti | 5.602437  | 3.564219  | 20.233162 |
| O  | 6.932029  | 5.007732  | 20.228358 |
| O  | 7.110503  | 4.741376  | 16.044970 |
| Ti | 2.463011  | -4.093693 | 16.546615 |
| O  | 2.266134  | -3.730674 | 18.342657 |
| Ti | 2.221867  | -3.672941 | 20.255217 |
| Ti | 0.796968  | -7.653682 | 16.403326 |
| O  | 1.727143  | -5.694338 | 19.972725 |
| O  | 0.370657  | -7.889697 | 18.275023 |
| Ti | 0.722625  | -7.304352 | 20.018302 |
| O  | 1.777561  | -5.972810 | 16.142530 |
| O  | 3.547533  | -2.412379 | 16.147331 |
| O  | 3.389860  | -2.085432 | 20.390326 |
| O  | 7.508580  | -1.934369 | 27.219359 |
| O  | 7.677296  | -2.059738 | 22.891276 |
| O  | 9.289282  | 1.496736  | 26.347775 |
| O  | 9.386633  | 1.541197  | 23.015133 |
| O  | 10.539882 | 3.816193  | 24.572743 |
| Ti | 10.359595 | 3.144414  | 22.807738 |
| Ti | 10.186234 | 3.152899  | 26.291938 |
| Ti | 8.702996  | -0.415456 | 26.705253 |

|    |           |           |           |
|----|-----------|-----------|-----------|
| O  | 8.855411  | -0.742907 | 24.908998 |
| Ti | 8.946328  | -0.514254 | 23.009153 |
| O  | 4.122483  | -8.394938 | 26.961538 |
| O  | 7.175724  | -8.641934 | 21.939118 |
| O  | 7.359742  | -7.526245 | 26.601533 |
| O  | 5.651294  | -5.328073 | 27.083977 |
| Ti | 5.452483  | -7.160327 | 26.317859 |
| O  | 5.616184  | -7.458393 | 24.499040 |
| O  | 5.892926  | -5.617919 | 22.792948 |
| Ti | 5.572508  | -7.707532 | 22.597766 |
| O  | 4.262144  | -9.142359 | 22.513437 |
| O  | 8.634864  | -4.634614 | 27.164125 |
| Ti | 6.968336  | -3.822841 | 26.681568 |
| O  | 6.951883  | -3.911523 | 24.855099 |
| O  | 8.659520  | -5.080995 | 22.273259 |
| Ti | 7.139772  | -4.042188 | 22.910293 |
| O  | 10.756919 | -1.032590 | 22.568060 |
| Ti | 12.452515 | -1.903882 | 23.238087 |
| O  | 12.006158 | -1.054321 | 24.977295 |
| O  | 10.287067 | -0.648757 | 27.691735 |
| Ti | 11.856133 | -1.192244 | 26.807481 |
| O  | 13.569465 | -2.284239 | 27.451830 |
| O  | 14.409595 | -2.765496 | 22.847672 |
| O  | 11.892998 | 2.896016  | 27.061061 |
| O  | 12.209035 | 2.585758  | 22.393195 |
| O  | 13.639883 | -0.221551 | 22.671758 |
| Ti | 13.919927 | 1.770010  | 22.864761 |
| O  | 13.660217 | 2.028692  | 24.705374 |
| O  | 13.212735 | 0.271693  | 27.282205 |
| Ti | 13.534656 | 2.078237  | 26.591286 |
| O  | 14.951294 | 3.377990  | 27.003282 |
| O  | 15.555539 | 0.879434  | 26.407070 |
| O  | 15.945984 | 0.834355  | 22.920528 |
| O  | 15.143193 | 3.355882  | 22.283138 |
| O  | 16.920230 | 3.239878  | 24.455184 |
| Ti | 16.873583 | 2.509793  | 22.727224 |
| O  | 18.597893 | 1.667920  | 22.178864 |
| Ti | 16.401485 | 2.556657  | 26.144319 |
| O  | 18.119499 | 2.022956  | 26.685390 |
| Ti | 18.693800 | 0.439701  | 25.826408 |
| Ti | 18.969550 | -0.122310 | 23.020426 |
| O  | 19.118333 | -0.810761 | 27.148787 |
| Ti | 18.159345 | -2.464242 | 27.031563 |
| O  | 19.171707 | -2.974213 | 25.498004 |
| O  | 20.061240 | -1.674784 | 23.019023 |
| Ti | 18.998024 | -3.105091 | 23.644718 |
| O  | 17.525099 | -0.358522 | 24.458129 |
| O  | 17.708837 | -4.265068 | 27.331280 |
| O  | 16.514752 | -1.693758 | 27.533213 |
| Ti | 14.933854 | -0.997444 | 26.767111 |
| O  | 19.935961 | 0.748654  | 24.492338 |
| O  | 15.071373 | -1.492029 | 25.010757 |

|    |           |           |           |
|----|-----------|-----------|-----------|
| O  | 17.371869 | -2.254495 | 22.799943 |
| Ti | 15.632999 | -1.200792 | 23.196412 |
| Ti | 10.491279 | -5.329675 | 23.017372 |
| O  | 9.944672  | -3.932995 | 24.367016 |
| Ti | 10.152923 | -4.527781 | 26.092429 |
| Ti | 9.162211  | -8.983711 | 22.379790 |
| O  | 10.048667 | -6.406218 | 24.959421 |
| O  | 10.371251 | -8.413109 | 26.779853 |
| O  | 8.640743  | -9.029799 | 24.238963 |
| Ti | 8.912606  | -7.878623 | 25.667304 |
| O  | 10.063159 | -7.265344 | 22.279725 |
| Ti | 14.999386 | -7.609825 | 25.412422 |
| O  | 15.603722 | -8.708551 | 24.045222 |
| Ti | 15.540871 | -7.488012 | 22.518220 |
| O  | 14.535476 | -6.220658 | 24.196621 |
| O  | 14.023872 | -8.551091 | 21.770149 |
| O  | 13.638762 | -7.932748 | 26.670422 |
| O  | 11.943599 | -5.616749 | 26.563045 |
| Ti | 11.875980 | -7.535159 | 26.042893 |
| O  | 12.214020 | -8.337387 | 24.372015 |
| O  | 12.375353 | -6.228077 | 22.824291 |
| Ti | 12.096009 | -8.306814 | 22.474192 |
| O  | 10.860809 | -9.818440 | 22.371912 |
| O  | 11.723245 | -3.747370 | 22.494728 |
| O  | 11.235685 | -3.139453 | 26.944256 |
| Ti | 16.613903 | -5.120982 | 26.035011 |
| O  | 17.219574 | -4.557991 | 24.299956 |
| O  | 19.307679 | -4.563014 | 22.507874 |
| Ti | 17.517743 | -5.252017 | 22.417662 |
| O  | 17.466067 | -7.104337 | 22.497471 |
| O  | 16.590118 | -6.974816 | 26.235592 |
| O  | 14.896334 | -4.633252 | 26.651161 |
| Ti | 13.147983 | -3.986857 | 26.438864 |
| O  | 12.987404 | -3.658710 | 24.620923 |
| O  | 15.452791 | -5.375616 | 22.160250 |
| Ti | 13.696558 | -4.693434 | 22.911845 |
| Ti | -4.096136 | 1.199218  | 23.206380 |
| O  | -4.134524 | 0.489899  | 24.976185 |
| O  | -5.262172 | -0.337875 | 27.454331 |
| Ti | -3.901064 | 0.803988  | 26.804523 |
| O  | -3.755715 | 2.708576  | 26.829936 |
| O  | -4.524931 | 3.058533  | 22.869454 |
| O  | -2.611412 | 0.271379  | 22.418313 |
| Ti | -0.823822 | -0.404863 | 23.038332 |
| O  | -0.709791 | -0.180875 | 24.941516 |
| O  | -2.235248 | 0.315765  | 27.472746 |
| Ti | -0.581817 | -0.332675 | 26.782578 |
| O  | 1.258795  | -1.345527 | 27.202777 |
| O  | 1.035926  | -1.355932 | 22.904283 |
| Ti | -2.853032 | 3.974494  | 22.989696 |
| O  | -2.871010 | 4.901803  | 24.641773 |
| Ti | -2.365912 | 3.408874  | 25.771960 |

|    |           |           |           |
|----|-----------|-----------|-----------|
| O  | -2.313221 | 2.342723  | 24.149192 |
| O  | -0.814115 | 3.535143  | 26.759678 |
| O  | -0.938293 | 4.064831  | 22.456553 |
| O  | 0.339890  | 1.276340  | 22.634514 |
| Ti | 0.837862  | 3.248219  | 22.872173 |
| O  | 0.935634  | 3.302373  | 24.726914 |
| O  | 0.716666  | 1.176911  | 27.230286 |
| Ti | 1.061624  | 3.016778  | 26.588677 |
| O  | 2.353310  | 4.285232  | 27.228813 |
| O  | 3.029458  | 1.978178  | 26.218717 |
| O  | 2.813482  | 2.221938  | 22.938674 |
| O  | 2.066976  | 4.813339  | 22.403760 |
| O  | 4.109921  | 4.411529  | 24.632262 |
| Ti | 3.801234  | 3.837260  | 22.840378 |
| Ti | 3.935299  | 3.644019  | 26.333768 |
| Ti | 2.517310  | 0.074417  | 26.647284 |
| O  | 2.539371  | -0.261741 | 24.836765 |
| Ti | 2.290512  | 0.197172  | 23.003059 |
| Ti | -6.628771 | -5.087529 | 22.771443 |
| Ti | -6.023600 | -5.003065 | 25.535141 |
| O  | -7.066852 | -3.256813 | 22.584525 |
| Ti | -5.903811 | -1.729487 | 22.771106 |
| O  | -5.829664 | -1.511995 | 24.671812 |
| O  | -6.525304 | -3.502503 | 26.526429 |
| Ti | -5.409597 | -1.953436 | 26.448035 |
| O  | -4.936151 | -4.660087 | 23.966518 |
| O  | -5.757059 | 0.332534  | 22.475971 |
| O  | -4.270940 | -2.675401 | 22.397946 |
| Ti | -2.766350 | -3.851452 | 23.070053 |
| O  | -7.452749 | -5.550177 | 24.414859 |
| O  | -2.495079 | -2.846962 | 24.708248 |
| O  | -3.910632 | -2.900854 | 27.133635 |
| Ti | -2.307938 | -3.529537 | 26.396478 |
| Ti | -3.935352 | -7.536557 | 22.669981 |
| O  | -5.884506 | -6.917727 | 22.233816 |
| O  | -2.707608 | -5.387595 | 25.725183 |
| O  | -2.214992 | -7.706451 | 26.985891 |
| O  | -4.225642 | -7.985956 | 24.502624 |
| Ti | -3.640829 | -7.012884 | 25.979699 |
| O  | -5.293572 | -6.343759 | 26.628917 |
| O  | -3.108182 | -5.795914 | 22.555567 |
| O  | 0.632572  | -7.902891 | 22.094666 |
| O  | 0.943262  | -7.398794 | 27.032975 |
| O  | -0.592574 | -4.758143 | 27.065571 |
| Ti | -0.690273 | -6.616305 | 26.451002 |
| O  | -0.525260 | -6.814904 | 24.614482 |
| O  | -0.815071 | -4.850492 | 22.911412 |
| Ti | -0.937282 | -6.912498 | 22.748932 |
| O  | -2.247156 | -8.352295 | 22.624753 |
| O  | -1.409249 | -2.297059 | 22.540610 |
| O  | -1.069004 | -2.231647 | 27.245210 |
| O  | 2.337667  | -3.969490 | 27.427927 |

|    |          |           |           |
|----|----------|-----------|-----------|
| Ti | 0.746936 | -3.246343 | 26.728601 |
| O  | 0.711948 | -3.323158 | 24.894705 |
| O  | 2.182472 | -4.186971 | 22.384382 |
| Ti | 0.497869 | -3.358420 | 22.952354 |
| O  | 4.128481 | -0.259974 | 22.498603 |
| Ti | 5.819951 | -1.088941 | 23.044565 |
| O  | 5.676301 | -0.800089 | 24.932174 |
| O  | 4.097985 | -0.262386 | 27.594340 |
| Ti | 5.683786 | -0.902119 | 26.788050 |
| O  | 5.594877 | 3.339613  | 27.128110 |
| O  | 5.662010 | 3.348557  | 22.422320 |
| O  | 6.959510 | 0.581268  | 22.615574 |
| Ti | 7.410174 | 2.544332  | 22.868078 |
| O  | 7.162357 | 2.636376  | 24.732947 |
| O  | 6.922527 | 0.679281  | 27.195322 |
| Ti | 7.282566 | 2.561140  | 26.598795 |
| O  | 8.626494 | 3.896606  | 27.073080 |
| O  | 8.647714 | 4.094653  | 22.357548 |
| Ti | 4.053979 | -4.628576 | 22.918776 |
| O  | 3.858354 | -3.802581 | 24.635428 |
| Ti | 3.913889 | -4.235990 | 26.438741 |
| Ti | 2.591691 | -8.269797 | 22.589351 |
| O  | 3.451949 | -6.112998 | 25.834796 |
| O  | 2.190895 | -8.565059 | 24.453688 |
| Ti | 2.539172 | -7.756277 | 26.088704 |
| O  | 3.451495 | -6.541281 | 22.467436 |
| O  | 5.184162 | -2.973240 | 22.528872 |
| O  | 5.128171 | -2.808434 | 27.120808 |

anatase-like 3-D (1,2,4)-mer

|    |           |           |           |
|----|-----------|-----------|-----------|
| O  | 0.818964  | 0.710234  | 1.395743  |
| O  | 0.955815  | 0.512991  | -3.177525 |
| O  | 2.531948  | 4.295104  | 1.476097  |
| O  | 2.547609  | 3.869226  | -1.893188 |
| O  | 3.784462  | 6.336772  | -0.506417 |
| Ti | 3.408264  | 5.533787  | -2.132040 |
| Ti | 3.396793  | 6.020143  | 1.365056  |
| Ti | 1.928713  | 2.372340  | 1.028147  |
| O  | 2.190425  | 1.551364  | -0.689751 |
| Ti | 2.122082  | 1.974369  | -2.489638 |
| O  | -2.610228 | -6.355279 | 1.581875  |
| O  | 0.492968  | -5.659573 | -3.169875 |
| O  | 0.408589  | -5.602833 | 1.500994  |
| O  | -0.934219 | -2.846605 | 1.312597  |
| Ti | -1.367795 | -4.815121 | 1.074322  |
| O  | -1.088033 | -4.940368 | -0.786110 |
| O  | -0.840739 | -2.997672 | -3.253555 |
| Ti | -1.210877 | -4.877693 | -2.647100 |
| O  | -2.553643 | -6.209694 | -3.109543 |
| O  | 1.899401  | -1.998145 | 1.407305  |
| Ti | 0.193183  | -1.173920 | 0.880417  |
| O  | 0.381579  | -1.483319 | -1.005669 |

|    |           |           |           |
|----|-----------|-----------|-----------|
| O  | 1.940996  | -2.071757 | -3.692883 |
| Ti | 0.375457  | -1.396493 | -2.857693 |
| O  | 3.714852  | 1.726152  | -3.484735 |
| Ti | 5.251325  | 0.911880  | -2.793700 |
| O  | 5.281685  | 0.990966  | -0.969572 |
| O  | 3.819800  | 1.999517  | 1.560454  |
| Ti | 5.478052  | 1.164779  | 0.979283  |
| O  | 7.390297  | 0.137385  | 1.374968  |
| O  | 7.068012  | -0.066774 | -3.341919 |
| O  | 5.354626  | 5.694647  | 1.872482  |
| O  | 4.979369  | 5.144372  | -3.135437 |
| O  | 6.663341  | 2.437651  | -2.946255 |
| Ti | 6.528262  | 4.307452  | -2.468057 |
| O  | 6.380901  | 4.595517  | -0.657343 |
| O  | 6.791787  | 2.642982  | 0.960040  |
| Ti | 6.918352  | 4.696055  | 1.202721  |
| O  | 8.225353  | 6.146011  | 1.283202  |
| O  | 9.084013  | 3.592108  | 1.443982  |
| O  | 8.737810  | 2.827531  | -1.224808 |
| O  | 8.218417  | 5.075781  | -2.948853 |
| O  | 10.223112 | 5.637126  | -0.541076 |
| Ti | 9.593940  | 4.456427  | -1.829452 |
| O  | 11.178572 | 3.882776  | -2.688780 |
| Ti | 9.911403  | 5.321335  | 1.324241  |
| O  | 11.888131 | 4.723546  | 1.719072  |
| Ti | 12.663352 | 2.932810  | 1.153828  |
| Ti | 12.105212 | 2.653956  | -1.617413 |
| O  | 13.162265 | 1.107220  | 1.336256  |
| Ti | 11.962547 | -0.369605 | 1.125102  |
| O  | 12.006386 | -0.768771 | -0.741628 |
| O  | 12.555702 | 1.132760  | -2.579445 |
| Ti | 11.393217 | -0.406198 | -2.494626 |
| O  | 11.003958 | 2.409044  | -0.032204 |
| O  | 11.644583 | -2.439027 | 1.372388  |
| O  | 10.292501 | 0.534485  | 1.450388  |
| Ti | 8.752080  | 1.656639  | 0.716726  |
| O  | 13.483526 | 3.348378  | -0.519091 |
| O  | 8.471563  | 0.231763  | -0.736858 |
| O  | 9.915013  | 0.635025  | -3.117936 |
| Ti | 8.299990  | 1.112496  | -2.318399 |
| Ti | 3.507400  | -2.406052 | -2.740461 |
| O  | 3.489221  | -2.011116 | -0.946502 |
| Ti | 3.736576  | -2.442543 | 0.900615  |
| Ti | 2.146195  | -5.967039 | -2.379918 |
| O  | 3.262418  | -4.476867 | 0.967975  |
| O  | 4.038716  | -7.046024 | 1.519662  |
| O  | 1.973225  | -6.721275 | -0.679875 |
| Ti | 2.275063  | -6.093383 | 1.102247  |
| O  | 3.066285  | -4.304035 | -2.252900 |
| Ti | 9.077104  | -5.983691 | 1.077074  |
| O  | 9.198885  | -6.955247 | -0.555680 |
| Ti | 8.555875  | -5.612642 | -1.796363 |

|    |            |           |           |
|----|------------|-----------|-----------|
| O  | 8.558795   | -4.411469 | -0.269826 |
| O  | 6.974425   | -5.786932 | -2.696242 |
| O  | 7.125143   | -6.119473 | 1.430115  |
| O  | 5.712441   | -3.475029 | 1.230329  |
| Ti | 5.256193   | -5.466562 | 1.055456  |
| O  | 5.180167   | -5.627982 | -0.794394 |
| O  | 5.321159   | -3.507640 | -3.352560 |
| Ti | 5.030338   | -5.327104 | -2.645778 |
| O  | 3.748920   | -6.593934 | -3.282515 |
| O  | 4.755489   | -0.975493 | -3.315090 |
| O  | 4.965259   | -0.862537 | 0.968989  |
| Ti | 10.035019  | -3.058561 | 0.439637  |
| O  | 10.072655  | -2.331062 | -1.334562 |
| O  | 11.290859  | -1.895720 | -3.730519 |
| Ti | 9.883808   | -2.979069 | -3.116440 |
| O  | 9.887531   | -4.869525 | -2.917525 |
| O  | 10.679408  | -4.835954 | 1.255044  |
| O  | 8.641243   | -2.404584 | 1.513594  |
| Ti | 6.822423   | -1.750443 | 0.822781  |
| O  | 6.751491   | -2.154743 | -1.079725 |
| O  | 8.198044   | -2.607727 | -3.763042 |
| Ti | 6.591151   | -1.982056 | -2.912112 |
| Ti | -10.535170 | 2.878793  | -2.290173 |
| O  | -11.131769 | 2.347648  | -0.548832 |
| O  | -13.298384 | 2.449429  | 1.194533  |
| Ti | -11.506891 | 3.149113  | 1.257977  |
| O  | -11.381825 | 4.989982  | 1.125252  |
| O  | -10.476244 | 4.732281  | -2.523142 |
| O  | -8.795788  | 2.378475  | -2.833433 |
| Ti | -7.033922  | 1.749864  | -2.615914 |
| O  | -6.886533  | 1.435152  | -0.789087 |
| O  | -9.419709  | 3.157802  | 1.533542  |
| Ti | -7.595985  | 2.520964  | 0.847283  |
| O  | -5.628056  | 1.509399  | 1.347408  |
| O  | -5.110107  | 0.894612  | -3.043706 |
| Ti | -8.899225  | 5.395281  | -1.706722 |
| O  | -9.489866  | 6.531121  | -0.367458 |
| Ti | -9.448563  | 5.314036  | 1.166417  |
| O  | -8.418038  | 4.051583  | -0.433270 |
| O  | -7.937454  | 6.373796  | 1.975666  |
| O  | -7.502678  | 5.691384  | -2.921874 |
| O  | -5.828208  | 3.380237  | -2.713272 |
| Ti | -5.768349  | 5.312319  | -2.202925 |
| O  | -6.116948  | 6.173850  | -0.564976 |
| O  | -6.246344  | 4.033361  | 0.906542  |
| Ti | -6.009117  | 6.091088  | 1.332527  |
| O  | -4.788467  | 7.601633  | 1.516683  |
| O  | -3.990798  | 5.049993  | 1.609823  |
| O  | -3.954177  | 4.191960  | -1.106682 |
| O  | -4.273325  | 6.225470  | -2.915655 |
| O  | -2.562525  | 6.811823  | -0.331996 |
| Ti | -2.843053  | 5.681821  | -1.778707 |

|    |            |           |           |
|----|------------|-----------|-----------|
| Ti | -3.091222  | 6.758221  | 1.526751  |
| Ti | -4.389563  | 3.094351  | 0.880106  |
| O  | -3.738166  | 1.749344  | -0.466964 |
| Ti | -4.039847  | 2.301033  | -2.206765 |
| Ti | -12.527409 | -2.603120 | -1.902071 |
| Ti | -12.715176 | -1.998649 | 0.945659  |
| O  | -13.022040 | -1.406061 | -3.275289 |
| Ti | -12.092537 | 0.239322  | -3.107211 |
| O  | -13.117367 | 0.752809  | -1.590709 |
| O  | -13.953718 | -0.557684 | 0.949953  |
| Ti | -12.942241 | 0.882608  | 0.259861  |
| O  | -11.329402 | -1.735185 | -0.591752 |
| O  | -11.673087 | 2.029847  | -3.545571 |
| O  | -10.380543 | -0.480605 | -3.395869 |
| Ti | -8.774255  | -1.258062 | -2.751910 |
| O  | -13.708228 | -2.899663 | -0.544736 |
| O  | -8.658109  | -0.859051 | -0.972407 |
| O  | -11.332332 | 0.038641  | 1.158923  |
| Ti | -9.560542  | -0.989262 | 0.771836  |
| Ti | -10.319619 | -4.798330 | -2.269092 |
| O  | -12.018396 | -4.208420 | -2.783594 |
| O  | -9.924288  | -3.052991 | 0.953258  |
| O  | -9.078644  | -5.524473 | 1.671849  |
| O  | -10.832734 | -5.507553 | -0.591734 |
| Ti | -10.794132 | -4.783203 | 1.133418  |
| O  | -12.532427 | -3.860285 | 1.698949  |
| O  | -9.467224  | -3.117645 | -2.505446 |
| O  | -5.813346  | -5.187889 | -3.109130 |
| O  | -6.151079  | -4.796521 | 1.544605  |
| O  | -7.563428  | -1.955830 | 1.288359  |
| Ti | -7.870269  | -3.945716 | 1.086104  |
| O  | -7.576821  | -4.257698 | -0.764162 |
| O  | -7.076723  | -2.531715 | -3.330718 |
| Ti | -7.439869  | -4.328489 | -2.635619 |
| O  | -8.854778  | -5.616739 | -3.099727 |
| O  | -7.449463  | 0.018847  | -3.559022 |
| O  | -8.360132  | 0.635499  | 1.057930  |
| O  | -4.731187  | -1.155005 | 1.374879  |
| Ti | -6.431720  | -0.311079 | 0.629685  |
| O  | -5.814840  | -1.167877 | -1.062724 |
| O  | -4.177047  | -1.635003 | -3.791956 |
| Ti | -5.725200  | -1.057612 | -2.892071 |
| O  | -2.535117  | 2.357954  | -3.296079 |
| Ti | -0.902011  | 1.513007  | -2.767182 |
| O  | -0.885783  | 1.616759  | -0.943784 |
| O  | -2.578222  | 2.901989  | 1.692672  |
| Ti | -1.154468  | 1.763836  | 0.997438  |
| O  | -1.134330  | 6.430913  | 2.026032  |
| O  | -1.328526  | 5.304362  | -2.774924 |
| O  | 0.391414   | 3.046546  | -3.150005 |
| Ti | 0.526709   | 4.888294  | -2.385396 |
| O  | 0.326499   | 5.180592  | -0.568883 |



|    |           |           |           |
|----|-----------|-----------|-----------|
| O  | 0.107941  | 3.351509  | 1.125339  |
| Ti | 0.428683  | 5.434555  | 1.336345  |
| O  | 1.723346  | 6.885393  | 1.414637  |
| O  | 1.839524  | 6.168573  | -2.999367 |
| Ti | -2.621222 | -1.901651 | -2.773767 |
| O  | -2.770206 | -1.540352 | -0.985280 |
| Ti | -2.948594 | -1.750554 | 0.917264  |
| Ti | -4.120822 | -5.456826 | -2.330981 |
| O  | -3.345925 | -3.797018 | 0.915704  |
| O  | -4.484249 | -6.099189 | -0.611536 |
| Ti | -4.333246 | -5.396260 | 1.152485  |
| O  | -3.208447 | -3.802738 | -2.410499 |
| O  | -1.430014 | -0.372810 | -3.307717 |
| O  | -1.669645 | -0.205582 | 1.037576  |
| O  | 2.521298  | 0.086926  | 7.792769  |
| O  | 2.619644  | -0.168484 | 3.521699  |
| O  | 4.249319  | 3.661399  | 7.818374  |
| O  | 4.262141  | 3.445602  | 3.987496  |
| O  | 5.618249  | 5.622881  | 5.690676  |
| Ti | 5.258926  | 5.061043  | 3.944320  |
| Ti | 5.217630  | 5.348192  | 7.567613  |
| Ti | 3.581919  | 1.780511  | 7.404221  |
| O  | 3.742403  | 1.445205  | 5.593741  |
| Ti | 3.775320  | 1.422122  | 3.689146  |
| O  | -0.954733 | -7.102955 | 7.855413  |
| O  | 2.184755  | -6.695333 | 3.167882  |
| O  | 2.158785  | -6.326227 | 7.773057  |
| O  | 0.840005  | -3.571220 | 7.707341  |
| Ti | 0.332816  | -5.561262 | 7.385316  |
| O  | 0.601892  | -5.649840 | 5.556898  |
| O  | 0.877334  | -3.804911 | 3.532617  |
| Ti | 0.446541  | -5.831765 | 3.680336  |
| O  | -0.891040 | -7.250686 | 3.679562  |
| O  | 3.683520  | -2.583140 | 7.778825  |
| Ti | 1.910169  | -1.822367 | 7.313202  |
| O  | 2.044332  | -2.030037 | 5.476770  |
| O  | 3.843126  | -2.751615 | 3.047936  |
| Ti | 2.041291  | -2.185718 | 3.582432  |
| O  | 5.535226  | 0.822598  | 3.143281  |
| Ti | 7.328775  | 0.142775  | 3.601705  |
| O  | 7.172212  | 0.437314  | 5.429430  |
| O  | 5.434488  | 1.184064  | 7.870307  |
| Ti | 7.173653  | 0.459846  | 7.331480  |
| O  | 9.120440  | -0.598335 | 7.709442  |
| O  | 9.209939  | -0.880628 | 3.665246  |
| O  | 7.176399  | 4.959725  | 8.030671  |
| O  | 7.004905  | 4.298753  | 3.318568  |
| O  | 8.589388  | 1.700576  | 3.117620  |
| Ti | 8.800741  | 3.613036  | 3.755371  |
| O  | 8.629681  | 3.705386  | 5.555027  |
| O  | 8.454418  | 1.988683  | 7.453616  |
| Ti | 8.855160  | 4.027356  | 7.466318  |

|    |           |           |          |
|----|-----------|-----------|----------|
| O  | 10.315438 | 5.271907  | 7.277804 |
| O  | 10.891601 | 2.807416  | 7.816453 |
| O  | 10.871633 | 2.673282  | 3.763378 |
| O  | 10.034162 | 5.293981  | 3.414416 |
| O  | 12.351754 | 4.992409  | 5.401612 |
| Ti | 11.766572 | 4.373737  | 3.786405 |
| O  | 13.431706 | 3.215866  | 3.151836 |
| Ti | 12.024507 | 4.379434  | 7.293991 |
| O  | 13.975447 | 4.298484  | 8.091580 |
| Ti | 14.724422 | 2.526187  | 7.437054 |
| Ti | 13.949223 | 2.162863  | 4.707082 |
| O  | 14.809114 | 0.681424  | 7.732362 |
| Ti | 13.779476 | -0.946099 | 7.611077 |
| O  | 14.308556 | -1.604549 | 5.910819 |
| O  | 13.992803 | 0.419650  | 4.314389 |
| Ti | 13.429699 | -1.557958 | 4.241624 |
| O  | 12.946453 | 2.594283  | 6.351363 |
| O  | 13.268304 | -2.990505 | 7.842964 |
| O  | 12.063059 | -0.076492 | 7.788139 |
| Ti | 10.352567 | 0.943923  | 7.316290 |
| O  | 15.517255 | 2.697904  | 5.728153 |
| O  | 10.674243 | 0.680426  | 5.504274 |
| O  | 12.013501 | -0.566113 | 3.206675 |
| Ti | 10.455091 | 0.637266  | 3.631191 |
| Ti | 5.604613  | -3.388283 | 3.602583 |
| O  | 5.359751  | -3.284802 | 5.412347 |
| Ti | 5.471463  | -3.190070 | 7.307819 |
| Ti | 4.127879  | -7.083835 | 3.656348 |
| O  | 5.079175  | -5.270105 | 7.134338 |
| O  | 5.806174  | -7.762869 | 7.736377 |
| O  | 3.772738  | -7.423906 | 5.495820 |
| Ti | 4.009007  | -6.835287 | 7.290946 |
| O  | 5.048471  | -5.360829 | 3.358449 |
| Ti | 10.854412 | -6.582096 | 7.331308 |
| O  | 10.994774 | -7.483618 | 5.677489 |
| Ti | 10.546877 | -6.082494 | 4.370870 |
| O  | 10.350508 | -5.009394 | 6.077329 |
| O  | 9.209270  | -6.712471 | 3.009155 |
| O  | 8.913095  | -6.810985 | 7.760176 |
| O  | 7.447216  | -4.237159 | 7.680035 |
| Ti | 7.033547  | -6.212704 | 7.270077 |
| O  | 7.466967  | -6.428455 | 5.439978 |
| O  | 7.442527  | -4.409165 | 3.432858 |
| Ti | 7.138268  | -6.421800 | 3.589865 |
| O  | 5.890973  | -7.874392 | 3.542008 |
| O  | 6.712402  | -1.784469 | 3.162601 |
| O  | 6.591398  | -1.564907 | 7.447139 |
| Ti | 11.789062 | -3.676444 | 6.705786 |
| O  | 12.023376 | -2.935029 | 4.955905 |
| O  | 13.732372 | -2.971290 | 2.997413 |
| Ti | 12.018847 | -3.890586 | 2.884576 |
| O  | 12.203136 | -5.715768 | 3.509950 |

|    |            |           |          |
|----|------------|-----------|----------|
| O  | 12.466094  | -5.432321 | 7.597475 |
| O  | 10.391672  | -3.045045 | 7.869818 |
| Ti | 8.487816   | -2.503722 | 7.374124 |
| O  | 8.430709   | -2.595642 | 5.538073 |
| O  | 10.128908  | -4.048281 | 3.632900 |
| Ti | 8.657729   | -2.802267 | 3.670241 |
| Ti | -9.212303  | 2.897281  | 3.734587 |
| O  | -9.465619  | 1.308968  | 4.857102 |
| O  | -10.547807 | 2.081554  | 7.501140 |
| Ti | -9.196885  | 2.974691  | 8.463552 |
| O  | -9.457809  | 4.829035  | 7.869327 |
| O  | -9.600562  | 4.955682  | 3.279193 |
| O  | -7.444057  | 2.553720  | 3.002898 |
| Ti | -5.790676  | 1.575747  | 3.591702 |
| O  | -5.824011  | 1.716562  | 5.447637 |
| O  | -7.533423  | 2.982972  | 7.402714 |
| Ti | -5.963034  | 1.793318  | 7.343238 |
| O  | -3.984488  | 0.800100  | 7.806035 |
| O  | -3.892613  | 0.613377  | 3.521639 |
| Ti | -7.915346  | 5.705371  | 4.003075 |
| O  | -7.943626  | 6.579868  | 5.646637 |
| Ti | -7.890564  | 5.047665  | 6.879851 |
| O  | -8.171115  | 4.003844  | 5.142970 |
| O  | -6.500044  | 5.591523  | 8.216242 |
| O  | -6.062863  | 5.618168  | 3.470024 |
| O  | -4.593905  | 3.215393  | 3.294195 |
| Ti | -4.195070  | 5.085125  | 3.991856 |
| O  | -4.714727  | 5.302814  | 5.783071 |
| O  | -4.744332  | 3.370894  | 7.654004 |
| Ti | -4.436882  | 5.422046  | 7.654253 |
| O  | -3.179383  | 6.891354  | 7.705037 |
| O  | -2.351027  | 4.387099  | 7.875834 |
| O  | -2.275039  | 4.201394  | 4.236126 |
| O  | -3.024358  | 6.708068  | 3.637410 |
| O  | -0.953373  | 6.399134  | 5.853073 |
| Ti | -1.232292  | 5.788166  | 4.098315 |
| Ti | -1.428877  | 6.097041  | 7.699570 |
| Ti | -2.872873  | 2.451101  | 7.456176 |
| O  | -2.603991  | 2.146694  | 5.667624 |
| Ti | -2.722097  | 2.174650  | 3.750625 |
| Ti | -11.902864 | -3.503837 | 3.693834 |
| Ti | -11.196507 | -3.137579 | 6.418575 |
| O  | -12.048472 | -1.690811 | 2.962837 |
| Ti | -11.093319 | 0.181750  | 3.377905 |
| O  | -11.886175 | 0.265286  | 5.040973 |
| O  | -11.133191 | -1.400262 | 6.715797 |
| Ti | -10.450989 | 0.533048  | 6.365813 |
| O  | -10.178850 | -3.458197 | 4.732185 |
| O  | -11.095827 | 2.158356  | 2.996192 |
| O  | -9.470642  | -0.878896 | 2.971078 |
| Ti | -7.754347  | -1.745659 | 3.605952 |
| O  | -12.769596 | -3.577935 | 5.330829 |

|    |            |           |           |
|----|------------|-----------|-----------|
| O  | -7.974783  | -1.552231 | 5.455522  |
| O  | -9.271717  | -0.346917 | 7.787858  |
| Ti | -7.780849  | -1.652590 | 7.340078  |
| Ti | -9.234629  | -5.313921 | 3.887466  |
| O  | -11.157676 | -5.323026 | 3.128974  |
| O  | -8.333894  | -3.635910 | 7.324084  |
| O  | -7.514452  | -6.186153 | 7.931911  |
| O  | -9.684505  | -5.925801 | 5.741114  |
| Ti | -9.203824  | -5.373804 | 7.414303  |
| O  | -10.950054 | -4.264769 | 7.970233  |
| O  | -8.155413  | -3.709845 | 3.288956  |
| O  | -4.478634  | -5.867930 | 3.247555  |
| O  | -4.507802  | -5.534406 | 7.874631  |
| O  | -5.888357  | -2.673533 | 7.764463  |
| Ti | -6.239087  | -4.676063 | 7.447217  |
| O  | -5.943013  | -4.626863 | 5.638441  |
| O  | -5.810496  | -2.870603 | 3.586987  |
| Ti | -6.158492  | -4.879508 | 3.754969  |
| O  | -7.557792  | -6.198362 | 3.959985  |
| O  | -6.486641  | -0.269132 | 3.182626  |
| O  | -6.499972  | -0.128734 | 7.360115  |
| O  | -2.918265  | -1.946913 | 7.812847  |
| Ti | -4.613530  | -1.103782 | 7.278575  |
| O  | -4.462522  | -1.248146 | 5.458480  |
| O  | -2.807056  | -2.104751 | 3.052711  |
| Ti | -4.566271  | -1.352389 | 3.537266  |
| O  | -1.033711  | 1.415643  | 3.158881  |
| Ti | 0.724923   | 0.745927  | 3.731659  |
| O  | 0.564936   | 0.956756  | 5.562357  |
| O  | -1.090753  | 1.948316  | 8.103907  |
| Ti | 0.562157   | 1.122098  | 7.473600  |
| O  | 0.512186   | 5.734552  | 8.227855  |
| O  | 0.475055   | 5.019730  | 3.458437  |
| O  | 1.831448   | 2.437845  | 3.331458  |
| Ti | 2.297131   | 4.363429  | 3.912278  |
| O  | 2.044769   | 4.543574  | 5.723406  |
| O  | 1.726122   | 2.761730  | 7.587438  |
| Ti | 2.172554   | 4.818930  | 7.624336  |
| O  | 3.530603   | 6.220638  | 7.625219  |
| O  | 3.482998   | 5.973687  | 3.494625  |
| Ti | -1.026151  | -2.754913 | 3.640684  |
| O  | -1.168468  | -2.539290 | 5.459701  |
| Ti | -1.105355  | -2.535477 | 7.360701  |
| Ti | -2.568437  | -6.374567 | 3.754783  |
| O  | -1.622311  | -4.562571 | 7.277957  |
| O  | -2.966480  | -6.691908 | 5.601188  |
| Ti | -2.683056  | -6.133275 | 7.387121  |
| O  | -1.613997  | -4.681308 | 3.402097  |
| O  | 0.124420   | -1.155820 | 3.229919  |
| O  | 0.021554   | -0.903433 | 7.479613  |
| O  | 4.202772   | -0.607684 | 14.084066 |
| O  | 4.349483   | -0.861840 | 9.894919  |

|    |           |           |           |
|----|-----------|-----------|-----------|
| O  | 5.877971  | 2.999253  | 14.078540 |
| O  | 6.005428  | 2.795712  | 10.215497 |
| O  | 7.274821  | 4.955815  | 11.944997 |
| Ti | 7.045441  | 4.385687  | 10.154709 |
| Ti | 6.869342  | 4.684276  | 13.806768 |
| Ti | 5.270563  | 1.085626  | 13.697610 |
| O  | 5.457683  | 0.792908  | 11.891318 |
| Ti | 5.494702  | 0.759875  | 9.988970  |
| O  | 0.712307  | -7.808851 | 14.137549 |
| O  | 3.926167  | -7.458013 | 9.373576  |
| O  | 3.831602  | -7.034385 | 14.057320 |
| O  | 2.534622  | -4.285773 | 14.016132 |
| Ti | 2.007797  | -6.267429 | 13.646559 |
| O  | 2.291627  | -6.392096 | 11.820830 |
| O  | 2.642184  | -4.541236 | 9.835737  |
| Ti | 2.197755  | -6.594205 | 9.929963  |
| O  | 0.820001  | -7.983810 | 9.922522  |
| O  | 5.354960  | -3.263660 | 14.144371 |
| Ti | 3.584999  | -2.527895 | 13.648721 |
| O  | 3.742633  | -2.714617 | 11.816410 |
| O  | 5.499393  | -3.664340 | 9.397802  |
| Ti | 3.787989  | -2.886569 | 9.929234  |
| O  | 7.298185  | 0.208376  | 9.493439  |
| Ti | 9.035573  | -0.532968 | 10.048987 |
| O  | 8.806256  | -0.264322 | 11.849740 |
| O  | 7.111998  | 0.524618  | 14.233143 |
| Ti | 8.860785  | -0.197539 | 13.750899 |
| O  | 10.787474 | -1.255949 | 14.112099 |
| O  | 10.916138 | -1.488758 | 9.954036  |
| O  | 8.829335  | 4.284775  | 14.278125 |
| O  | 8.873261  | 3.836964  | 9.628840  |
| O  | 10.276258 | 1.065642  | 9.629500  |
| Ti | 10.656099 | 3.054032  | 10.036924 |
| O  | 10.436300 | 3.116787  | 11.846746 |
| O  | 10.140388 | 1.341617  | 13.795390 |
| Ti | 10.549194 | 3.373088  | 13.758776 |
| O  | 12.033335 | 4.602806  | 13.629973 |
| O  | 12.605316 | 2.130933  | 14.132908 |
| O  | 12.707982 | 2.046477  | 10.093271 |
| O  | 11.918387 | 4.584146  | 9.516583  |
| O  | 14.087902 | 4.355443  | 11.755378 |
| Ti | 13.621406 | 3.764361  | 10.083668 |
| O  | 15.346813 | 2.654908  | 9.510567  |
| Ti | 13.744076 | 3.707420  | 13.624985 |
| O  | 15.693069 | 3.603618  | 14.464879 |
| Ti | 16.442741 | 1.866456  | 13.785565 |
| Ti | 15.745278 | 1.525710  | 11.041378 |
| O  | 16.493795 | 0.028332  | 14.113815 |
| Ti | 15.471643 | -1.601524 | 14.020730 |
| O  | 16.039273 | -2.245504 | 12.329687 |
| O  | 15.828996 | -0.222615 | 10.656404 |
| Ti | 15.185904 | -2.182194 | 10.649226 |

|    |           |           |           |
|----|-----------|-----------|-----------|
| O  | 14.695884 | 1.936862  | 12.661610 |
| O  | 14.944390 | -3.621907 | 14.238288 |
| O  | 13.742131 | -0.763098 | 14.184224 |
| Ti | 12.037656 | 0.264642  | 13.702538 |
| O  | 17.291063 | 2.049423  | 12.111310 |
| O  | 12.335168 | -0.009260 | 11.892023 |
| O  | 13.781263 | -1.111396 | 9.665133  |
| Ti | 12.180505 | 0.054507  | 10.017433 |
| Ti | 7.327012  | -4.156592 | 9.991286  |
| O  | 7.010773  | -3.908347 | 11.772323 |
| Ti | 7.151351  | -3.853636 | 13.664820 |
| Ti | 5.878110  | -7.817031 | 9.890277  |
| O  | 6.751957  | -5.935279 | 13.415297 |
| O  | 7.477334  | -8.419812 | 14.026271 |
| O  | 5.476791  | -8.094430 | 11.745445 |
| Ti | 5.686536  | -7.508262 | 13.542927 |
| O  | 6.807241  | -6.108500 | 9.644255  |
| Ti | 12.530367 | -7.212612 | 13.645607 |
| O  | 12.699765 | -8.118754 | 12.008435 |
| Ti | 12.278467 | -6.715818 | 10.675708 |
| O  | 12.037476 | -5.647680 | 12.411009 |
| O  | 10.969848 | -7.342618 | 9.307467  |
| O  | 10.580720 | -7.445433 | 14.083611 |
| O  | 9.124116  | -4.892229 | 14.002609 |
| Ti | 8.710518  | -6.863265 | 13.553786 |
| O  | 9.148466  | -7.108455 | 11.740463 |
| O  | 9.183761  | -5.071650 | 9.835982  |
| Ti | 8.892945  | -7.122064 | 9.862183  |
| O  | 7.640300  | -8.597966 | 9.811871  |
| O  | 8.377310  | -2.462528 | 9.616315  |
| O  | 8.273784  | -2.238660 | 13.820700 |
| Ti | 13.457427 | -4.313148 | 13.064784 |
| O  | 13.744932 | -3.536032 | 11.343142 |
| O  | 15.457760 | -3.567645 | 9.381504  |
| Ti | 13.729927 | -4.485114 | 9.233964  |
| O  | 13.943398 | -6.320604 | 9.863661  |
| O  | 14.143113 | -6.069171 | 13.949649 |
| O  | 12.057687 | -3.714359 | 14.244399 |
| Ti | 10.170116 | -3.162823 | 13.712658 |
| O  | 10.183523 | -3.168793 | 11.879859 |
| O  | 11.845280 | -4.696682 | 10.011575 |
| Ti | 10.395173 | -3.438409 | 10.000570 |
| Ti | -7.273094 | 2.002880  | 10.826527 |
| O  | -7.545830 | 1.199563  | 12.527872 |
| O  | -9.299097 | 1.294823  | 14.460730 |
| Ti | -7.549152 | 2.180888  | 14.556421 |
| O  | -7.752451 | 4.004788  | 13.895047 |
| O  | -8.003293 | 3.812751  | 10.032536 |
| O  | -6.002143 | 1.407525  | 9.522604  |
| Ti | -4.104779 | 0.845676  | 10.097054 |
| O  | -4.135916 | 0.857596  | 11.936975 |
| O  | -5.595523 | 2.423262  | 13.857547 |

|    |            |           |           |
|----|------------|-----------|-----------|
| Ti | -4.195789  | 1.107789  | 13.851230 |
| O  | -2.182513  | 0.082258  | 14.225368 |
| O  | -2.225633  | -0.104168 | 9.952102  |
| Ti | -6.359865  | 4.952578  | 10.215178 |
| O  | -6.496173  | 5.860717  | 11.835146 |
| Ti | -6.071034  | 4.420907  | 13.136463 |
| O  | -5.846044  | 3.346312  | 11.404029 |
| O  | -4.793519  | 5.060415  | 14.488712 |
| O  | -4.434374  | 5.144724  | 9.739242  |
| O  | -2.988667  | 2.531912  | 9.869360  |
| Ti | -2.600621  | 4.490826  | 10.295970 |
| O  | -3.107063  | 4.824449  | 12.073539 |
| O  | -2.913665  | 2.658059  | 13.978763 |
| Ti | -2.659134  | 4.712760  | 13.910691 |
| O  | -1.389419  | 6.158513  | 14.123521 |
| O  | -0.611328  | 3.674407  | 13.494341 |
| O  | -0.662310  | 3.521860  | 10.484207 |
| O  | -1.357653  | 6.026970  | 9.839986  |
| O  | 0.760794   | 5.790110  | 12.056891 |
| Ti | 0.427415   | 5.104529  | 10.328148 |
| Ti | 0.299467   | 5.295106  | 13.865375 |
| Ti | -1.025534  | 1.765683  | 13.823509 |
| O  | -0.753311  | 1.119498  | 12.100234 |
| Ti | -1.028610  | 1.460801  | 10.245714 |
| Ti | -10.356050 | -4.104575 | 10.027867 |
| Ti | -9.701770  | -3.763314 | 12.773210 |
| O  | -10.393273 | -2.258278 | 9.708134  |
| Ti | -9.355113  | -0.643626 | 9.802067  |
| O  | -9.916584  | -0.009807 | 11.517130 |
| O  | -9.805422  | -2.025463 | 13.203879 |
| Ti | -9.089157  | -0.101646 | 13.194857 |
| O  | -8.623076  | -4.179568 | 11.170591 |
| O  | -8.888401  | 1.428917  | 9.742579  |
| O  | -7.661076  | -1.549633 | 9.598019  |
| Ti | -5.954291  | -2.552930 | 10.065173 |
| O  | -11.233547 | -4.276148 | 11.684264 |
| O  | -6.168966  | -2.234318 | 11.877188 |
| O  | -7.666642  | -1.220444 | 14.076032 |
| Ti | -6.055461  | -2.359798 | 13.750154 |
| Ti | -7.672739  | -5.978217 | 10.213779 |
| O  | -9.587075  | -5.889381 | 9.386675  |
| O  | -6.627162  | -4.334856 | 13.684135 |
| O  | -5.897237  | -6.889728 | 14.248658 |
| O  | -8.056960  | -6.635079 | 12.052658 |
| Ti | -7.579207  | -6.029929 | 13.716287 |
| O  | -9.312052  | -4.913540 | 14.280423 |
| O  | -6.556883  | -4.410895 | 9.648856  |
| O  | -2.814298  | -6.646378 | 9.519718  |
| O  | -2.845308  | -6.261470 | 14.163271 |
| O  | -4.151821  | -3.401889 | 14.125660 |
| Ti | -4.587476  | -5.401422 | 13.752621 |
| O  | -4.353237  | -5.392494 | 11.940385 |

|    |           |           |           |
|----|-----------|-----------|-----------|
| O  | -4.076699 | -3.654993 | 9.951002  |
| Ti | -4.491129 | -5.680307 | 10.041785 |
| O  | -5.984117 | -6.893075 | 10.205857 |
| O  | -4.709116 | -1.044062 | 9.612618  |
| O  | -4.745748 | -0.826970 | 13.893247 |
| O  | -1.218433 | -2.656961 | 14.200754 |
| Ti | -2.901685 | -1.801315 | 13.686485 |
| O  | -2.743395 | -2.035280 | 11.881218 |
| O  | -1.050272 | -2.881836 | 9.491731  |
| Ti | -2.789677 | -2.118667 | 9.971247  |
| O  | 0.719332  | 0.848116  | 9.611137  |
| Ti | 2.465004  | 0.064619  | 10.112287 |
| O  | 2.218100  | 0.233399  | 11.941657 |
| O  | 0.750518  | 1.482486  | 14.710563 |
| Ti | 2.220008  | 0.420735  | 13.837117 |
| O  | 2.113635  | 4.914145  | 14.626389 |
| O  | 2.209479  | 4.472565  | 9.755932  |
| O  | 3.544080  | 1.797420  | 9.724351  |
| Ti | 4.043717  | 3.752515  | 10.181083 |
| O  | 3.730998  | 3.940389  | 11.994788 |
| O  | 3.384395  | 2.051356  | 13.837162 |
| Ti | 3.813673  | 4.099851  | 13.905563 |
| O  | 5.141547  | 5.516452  | 13.947733 |
| O  | 5.295252  | 5.327750  | 9.699700  |
| Ti | 0.772541  | -3.534979 | 9.990965  |
| O  | 0.581631  | -3.299283 | 11.803977 |
| Ti | 0.587826  | -3.256879 | 13.695483 |
| Ti | -0.873201 | -7.114720 | 10.005162 |
| O  | 0.046459  | -5.285190 | 13.545503 |
| O  | -1.288845 | -7.405841 | 11.861941 |
| Ti | -1.018823 | -6.850508 | 13.651226 |
| O  | 0.120075  | -5.434552 | 9.686382  |
| O  | 1.849362  | -1.852130 | 9.611167  |
| O  | 1.680491  | -1.606944 | 13.829479 |
| O  | 5.703310  | -1.081269 | 20.433370 |
| O  | 6.098904  | -1.579060 | 16.204826 |
| O  | 7.415700  | 2.477142  | 20.373983 |
| O  | 7.649625  | 2.160357  | 16.472838 |
| O  | 8.912944  | 4.336043  | 18.180082 |
| Ti | 8.694268  | 3.741970  | 16.402740 |
| Ti | 8.426124  | 4.152335  | 20.037569 |
| Ti | 6.724252  | 0.576616  | 20.017953 |
| O  | 7.211039  | 0.303401  | 18.251176 |
| Ti | 7.161172  | 0.096777  | 16.373215 |
| O  | 2.367326  | -8.316539 | 20.411338 |
| O  | 5.574218  | -8.169838 | 15.642520 |
| O  | 5.457041  | -7.481053 | 20.342395 |
| O  | 4.127274  | -4.765351 | 20.351783 |
| Ti | 3.636538  | -6.738185 | 19.921176 |
| O  | 3.878149  | -6.992303 | 18.107933 |
| O  | 4.342717  | -5.258059 | 16.156737 |
| Ti | 3.860852  | -7.318521 | 16.212526 |



|    |           |           |           |
|----|-----------|-----------|-----------|
| O  | 2.475615  | -8.705208 | 16.237273 |
| O  | 6.961408  | -3.682327 | 20.487095 |
| Ti | 5.168205  | -2.975700 | 19.974557 |
| O  | 5.374974  | -3.405795 | 18.168887 |
| O  | 7.161017  | -4.404558 | 15.734203 |
| Ti | 5.484142  | -3.590242 | 16.293671 |
| O  | 8.971411  | -0.447940 | 15.888724 |
| Ti | 10.706249 | -1.198516 | 16.440087 |
| O  | 10.448502 | -0.907292 | 18.233418 |
| O  | 8.606162  | -0.027444 | 20.581254 |
| Ti | 10.373261 | -0.742477 | 20.133239 |
| O  | 12.316365 | -1.801832 | 20.539185 |
| O  | 12.576105 | -2.163852 | 16.303329 |
| O  | 10.377271 | 3.728110  | 20.538080 |
| O  | 10.545630 | 3.204528  | 15.924072 |
| O  | 11.932494 | 0.413951  | 15.996358 |
| Ti | 12.322234 | 2.410727  | 16.330252 |
| O  | 12.125142 | 2.509433  | 18.152179 |
| O  | 11.668658 | 0.791323  | 20.163216 |
| Ti | 12.040693 | 2.802633  | 20.044787 |
| O  | 13.455760 | 4.198543  | 19.994167 |
| O  | 14.146812 | 1.614403  | 20.351739 |
| O  | 14.358760 | 1.344608  | 16.445161 |
| O  | 13.642867 | 3.890356  | 15.844014 |
| O  | 15.650698 | 3.617229  | 18.161772 |
| Ti | 15.319620 | 3.012193  | 16.448710 |
| O  | 17.041010 | 1.939188  | 15.899946 |
| Ti | 15.090646 | 3.300694  | 20.012432 |
| O  | 17.039925 | 2.842354  | 20.543059 |
| Ti | 17.862033 | 1.105650  | 20.005827 |
| Ti | 17.567645 | 0.627208  | 17.237936 |
| O  | 18.150853 | -0.645615 | 20.886448 |
| Ti | 17.006182 | -2.225633 | 20.518313 |
| O  | 17.570769 | -2.725349 | 18.784140 |
| O  | 17.928256 | -1.069548 | 16.684698 |
| Ti | 16.938418 | -2.792322 | 16.996636 |
| O  | 16.423576 | 0.604125  | 18.784813 |
| O  | 16.490120 | -4.251181 | 20.504209 |
| O  | 15.324019 | -1.285586 | 20.642921 |
| Ti | 13.592734 | -0.311405 | 20.084611 |
| O  | 18.933021 | 1.283858  | 18.463238 |
| O  | 13.805948 | -0.759059 | 18.301531 |
| O  | 15.511276 | -1.673344 | 16.110787 |
| Ti | 13.836917 | -0.626521 | 16.425574 |
| Ti | 8.999980  | -4.822614 | 16.340916 |
| O  | 8.674112  | -4.495552 | 18.113240 |
| Ti | 8.713894  | -4.384740 | 20.014209 |
| Ti | 7.530532  | -8.465749 | 16.171665 |
| O  | 8.315164  | -6.462617 | 19.749777 |
| O  | 9.068436  | -8.959665 | 20.329610 |
| O  | 7.091462  | -8.673957 | 18.037982 |
| Ti | 7.281598  | -8.057783 | 19.819377 |

|    |           |           |           |
|----|-----------|-----------|-----------|
| O  | 8.461787  | -6.764726 | 15.946165 |
| Ti | 14.036490 | -7.849061 | 19.916205 |
| O  | 14.220042 | -8.783919 | 18.308978 |
| Ti | 13.904448 | -7.363952 | 16.963627 |
| O  | 13.585172 | -6.277480 | 18.696963 |
| O  | 12.601470 | -8.015572 | 15.622486 |
| O  | 12.113450 | -8.018437 | 20.400688 |
| O  | 10.683513 | -5.434735 | 20.375787 |
| Ti | 10.276443 | -7.377974 | 19.863043 |
| O  | 10.695245 | -7.687766 | 18.060879 |
| O  | 10.842523 | -5.732206 | 16.201766 |
| Ti | 10.531967 | -7.791925 | 16.169205 |
| O  | 9.282294  | -9.269857 | 16.118905 |
| O  | 10.040243 | -3.123350 | 15.982908 |
| O  | 9.848090  | -2.787098 | 20.190386 |
| Ti | 14.935425 | -4.873617 | 19.323687 |
| O  | 15.362959 | -4.102037 | 17.651944 |
| O  | 17.149813 | -4.247223 | 15.796729 |
| Ti | 15.402269 | -5.114289 | 15.600428 |
| O  | 15.590718 | -6.967252 | 16.216840 |
| O  | 15.696709 | -6.695637 | 20.098587 |
| O  | 13.646008 | -4.333552 | 20.641160 |
| Ti | 11.758964 | -3.707452 | 20.116878 |
| O  | 11.880515 | -3.805227 | 18.281743 |
| O  | 13.492521 | -5.354684 | 16.334016 |
| Ti | 12.038272 | -4.097641 | 16.388121 |
| Ti | -5.592858 | 1.395435  | 17.074404 |
| O  | -5.876687 | 0.622195  | 18.765283 |
| O  | -7.491005 | 0.717966  | 20.791301 |
| Ti | -5.715324 | 1.593139  | 20.901273 |
| O  | -5.898683 | 3.418780  | 20.259906 |
| O  | -6.382971 | 3.120976  | 16.212727 |
| O  | -4.082085 | 0.678068  | 16.071461 |
| Ti | -2.226534 | 0.063744  | 16.402202 |
| O  | -1.259489 | 0.518607  | 18.133457 |
| O  | -3.922688 | 1.758789  | 19.834953 |
| Ti | -2.437835 | 0.590851  | 19.851690 |
| O  | -0.482268 | -0.314079 | 20.421280 |
| O  | -0.393255 | -0.949733 | 16.220532 |
| Ti | -4.783400 | 4.296460  | 16.414226 |
| O  | -4.929352 | 5.205501  | 18.030758 |
| Ti | -4.271793 | 3.864754  | 19.358181 |
| O  | -4.131068 | 2.729891  | 17.570140 |
| O  | -3.240102 | 4.517177  | 20.994069 |
| O  | -2.783899 | 4.396921  | 15.954583 |
| O  | -1.258460 | 1.884582  | 16.084884 |
| Ti | -1.222966 | 3.692102  | 16.951434 |
| O  | -2.006516 | 4.347057  | 18.575120 |
| O  | -1.307432 | 2.314754  | 19.912217 |
| Ti | -1.209834 | 4.282754  | 20.382586 |
| O  | 0.072054  | 5.680426  | 20.167272 |
| O  | 0.858251  | 3.173253  | 20.536064 |

|    |           |           |           |
|----|-----------|-----------|-----------|
| O  | 0.724265  | 2.626181  | 17.553371 |
| O  | 0.133031  | 4.793444  | 16.088257 |
| O  | 2.211331  | 4.907576  | 18.313990 |
| Ti | 1.937491  | 4.039931  | 16.666743 |
| Ti | 1.828160  | 4.844570  | 20.204061 |
| Ti | 0.502563  | 1.338596  | 19.579716 |
| O  | 1.728464  | 0.357126  | 18.405280 |
| Ti | 0.690660  | 0.622527  | 16.698292 |
| Ti | -8.696624 | -4.758121 | 16.335913 |
| Ti | -7.982143 | -4.328788 | 19.044997 |
| O  | -8.728540 | -2.910984 | 16.037346 |
| Ti | -7.646039 | -1.324133 | 16.149453 |
| O  | -8.234940 | -0.560774 | 17.788372 |
| O  | -8.057404 | -2.578970 | 19.460642 |
| Ti | -7.380143 | -0.634568 | 19.470816 |
| O  | -6.949070 | -4.852428 | 17.445887 |
| O  | -6.982163 | 0.647695  | 15.852698 |
| O  | -5.957550 | -2.254912 | 15.947598 |
| Ti | -4.250244 | -3.303400 | 16.381268 |
| O  | -9.545725 | -4.869944 | 18.012023 |
| O  | -4.601684 | -2.932673 | 18.153191 |
| O  | -5.931416 | -1.732903 | 20.332738 |
| Ti | -4.329286 | -2.884213 | 20.003082 |
| Ti | -6.028288 | -6.687623 | 16.496627 |
| O  | -7.955988 | -6.552783 | 15.695725 |
| O  | -4.934143 | -4.876821 | 19.964100 |
| O  | -4.171510 | -7.413381 | 20.568386 |
| O  | -6.356610 | -7.273860 | 18.365236 |
| Ti | -5.865857 | -6.593720 | 19.997543 |
| O  | -7.621361 | -5.490010 | 20.551052 |
| O  | -4.860893 | -5.155077 | 15.959998 |
| O  | -1.170232 | -7.414461 | 15.790676 |
| O  | -1.150695 | -6.675257 | 20.453960 |
| O  | -2.462940 | -3.869357 | 20.395524 |
| Ti | -2.915914 | -5.879433 | 20.028140 |
| O  | -2.742616 | -6.052493 | 18.218643 |
| O  | -2.387649 | -4.427456 | 16.265880 |
| Ti | -2.847420 | -6.474909 | 16.326500 |
| O  | -4.347066 | -7.659057 | 16.475377 |
| O  | -2.952842 | -1.768201 | 16.127024 |
| O  | -3.051197 | -1.278132 | 19.660521 |
| O  | 0.521370  | -2.965591 | 20.558665 |
| Ti | -1.197176 | -2.265637 | 19.978451 |
| O  | -0.982831 | -2.720594 | 18.205021 |
| O  | 0.628791  | -3.769324 | 15.790814 |
| Ti | -1.056605 | -2.980835 | 16.323197 |
| O  | 2.391229  | 0.023876  | 15.924475 |
| Ti | 4.204417  | -0.657765 | 16.365839 |
| O  | 4.321890  | -0.339313 | 18.165766 |
| O  | 2.048621  | 1.014641  | 20.805918 |
| Ti | 3.561839  | -0.015690 | 19.912057 |
| O  | 3.757615  | 4.577295  | 20.693982 |

|    |           |           |           |
|----|-----------|-----------|-----------|
| O  | 3.711426  | 3.528377  | 16.041339 |
| O  | 5.219513  | 1.113410  | 15.973643 |
| Ti | 5.690152  | 3.080495  | 16.405659 |
| O  | 5.354477  | 3.385507  | 18.195631 |
| O  | 4.851482  | 1.593544  | 20.118109 |
| Ti | 5.402621  | 3.602119  | 20.096926 |
| O  | 6.765384  | 5.037855  | 20.060116 |
| O  | 6.926526  | 4.667988  | 15.928261 |
| Ti | 2.499243  | -4.276510 | 16.318002 |
| O  | 2.223988  | -3.920241 | 18.102089 |
| Ti | 2.211906  | -3.763816 | 19.997619 |
| Ti | 0.792100  | -7.812758 | 16.280032 |
| O  | 1.662388  | -5.784102 | 19.849761 |
| O  | 0.353995  | -7.982880 | 18.154880 |
| Ti | 0.632411  | -7.375658 | 19.920493 |
| O  | 1.813362  | -6.158948 | 15.953771 |
| O  | 3.536633  | -2.567958 | 15.945318 |
| O  | 3.236296  | -2.071358 | 20.044165 |
| O  | 7.442387  | -1.713424 | 26.820971 |
| O  | 7.519615  | -1.990603 | 22.617548 |
| O  | 9.167301  | 1.821350  | 26.671177 |
| O  | 9.220270  | 1.652396  | 22.785293 |
| O  | 10.494611 | 3.811544  | 24.480767 |
| Ti | 10.264365 | 3.234957  | 22.698510 |
| Ti | 10.064397 | 3.540602  | 26.334731 |
| Ti | 8.599686  | -0.113503 | 26.425673 |
| O  | 8.697825  | -0.304863 | 24.603638 |
| Ti | 8.651695  | -0.367955 | 22.693675 |
| O  | 4.121670  | -8.857231 | 26.607694 |
| O  | 7.161636  | -8.683239 | 21.919034 |
| O  | 7.129802  | -7.904423 | 26.665637 |
| O  | 5.743844  | -5.314881 | 26.761722 |
| Ti | 5.314145  | -7.250169 | 26.193989 |
| O  | 5.575817  | -7.442104 | 24.381406 |
| O  | 5.918413  | -5.692839 | 22.485466 |
| Ti | 5.496223  | -7.767748 | 22.489185 |
| O  | 4.137799  | -9.180188 | 22.503312 |
| O  | 8.609902  | -4.309170 | 26.941595 |
| Ti | 6.857961  | -3.621534 | 26.367502 |
| O  | 6.997162  | -3.851673 | 24.535931 |
| O  | 8.713512  | -4.867130 | 22.105902 |
| Ti | 7.033204  | -4.015929 | 22.634607 |
| O  | 10.471123 | -0.963985 | 22.287384 |
| Ti | 12.190902 | -1.737209 | 22.869932 |
| O  | 11.977298 | -1.578024 | 24.686642 |
| O  | 10.355309 | -0.767901 | 27.071791 |
| Ti | 12.148402 | -1.478142 | 26.604130 |
| O  | 14.058962 | -2.532964 | 27.033345 |
| O  | 14.057022 | -2.725965 | 22.712337 |
| O  | 11.973401 | 3.075702  | 26.854880 |
| O  | 12.106614 | 2.683388  | 22.206581 |
| O  | 13.427244 | -0.141732 | 22.336916 |

|    |           |           |           |
|----|-----------|-----------|-----------|
| Ti | 13.847642 | 1.833849  | 22.643252 |
| O  | 13.490802 | 1.863794  | 24.444122 |
| O  | 13.291088 | 0.114717  | 26.604603 |
| Ti | 13.595425 | 2.075518  | 26.327091 |
| O  | 14.914040 | 3.554450  | 26.176483 |
| O  | 15.702833 | 0.966151  | 26.590355 |
| O  | 15.829763 | 0.783896  | 22.727574 |
| O  | 15.150827 | 3.348362  | 22.153460 |
| O  | 17.127260 | 3.091951  | 24.340735 |
| Ti | 16.869765 | 2.411093  | 22.649718 |
| O  | 18.542921 | 1.486924  | 22.074790 |
| Ti | 16.542913 | 2.691373  | 26.152974 |
| O  | 18.487081 | 2.083216  | 26.476290 |
| Ti | 19.222161 | 0.342819  | 25.835319 |
| Ti | 18.947279 | -0.230996 | 23.051262 |
| O  | 19.586924 | -1.276564 | 26.909650 |
| Ti | 18.638362 | -3.162366 | 26.599944 |
| O  | 19.632022 | -3.273381 | 25.044861 |
| O  | 19.332251 | -2.021815 | 22.762549 |
| Ti | 18.343989 | -3.522930 | 23.599127 |
| O  | 17.801072 | -0.216299 | 24.645022 |
| O  | 18.685377 | -5.071259 | 27.174687 |
| O  | 17.041900 | -1.970560 | 27.039592 |
| Ti | 15.324734 | -1.045008 | 26.547208 |
| O  | 20.297125 | 0.457139  | 24.315105 |
| O  | 15.127167 | -1.227429 | 24.717072 |
| O  | 16.837065 | -2.512893 | 22.617967 |
| Ti | 15.347961 | -1.211983 | 22.862607 |
| Ti | 10.536824 | -5.350100 | 22.726656 |
| O  | 10.257925 | -5.015963 | 24.506454 |
| Ti | 10.344781 | -5.016052 | 26.422329 |
| Ti | 9.116484  | -9.008533 | 22.457662 |
| O  | 9.887427  | -7.048404 | 25.953628 |
| O  | 10.656529 | -9.544483 | 26.538045 |
| O  | 8.619093  | -9.280778 | 24.304212 |
| Ti | 8.863221  | -8.650468 | 26.057455 |
| O  | 10.019695 | -7.290529 | 22.301170 |
| Ti | 15.525479 | -8.587132 | 26.163416 |
| O  | 15.538799 | -9.461299 | 24.517175 |
| Ti | 15.508745 | -7.933624 | 23.284619 |
| O  | 15.773217 | -6.879282 | 25.002896 |
| O  | 14.147898 | -8.474359 | 21.920864 |
| O  | 13.680509 | -8.432579 | 26.704982 |
| O  | 12.218584 | -6.039644 | 26.879342 |
| Ti | 11.816944 | -7.912501 | 26.178310 |
| O  | 12.337788 | -8.165874 | 24.388017 |
| O  | 12.414817 | -6.254779 | 22.551058 |
| Ti | 12.101214 | -8.301459 | 22.508662 |
| O  | 10.870423 | -9.792883 | 22.454658 |
| O  | 11.600715 | -3.673941 | 22.372434 |
| O  | 11.499791 | -3.451725 | 26.642689 |
| Ti | 16.836363 | -5.767492 | 26.368027 |

|    |           |           |           |
|----|-----------|-----------|-----------|
| O  | 17.215669 | -4.201988 | 25.213079 |
| O  | 18.307821 | -5.085781 | 22.519203 |
| Ti | 16.831536 | -5.902236 | 21.669272 |
| O  | 17.073004 | -7.749288 | 22.292360 |
| O  | 17.199055 | -7.851349 | 26.863940 |
| O  | 15.098720 | -5.334029 | 27.111453 |
| Ti | 13.415050 | -4.395205 | 26.585036 |
| O  | 13.465673 | -4.530872 | 24.724944 |
| O  | 15.193315 | -5.852853 | 22.757539 |
| Ti | 13.616883 | -4.657197 | 22.835111 |
| Ti | -3.643033 | 0.667579  | 23.471654 |
| O  | -4.435769 | -0.081832 | 25.109883 |
| O  | -6.406444 | -0.007966 | 26.943008 |
| Ti | -4.687548 | 0.857924  | 26.914825 |
| O  | -4.729515 | 2.704187  | 26.482229 |
| O  | -4.515717 | 2.441311  | 22.538587 |
| O  | -2.534330 | 0.346656  | 21.869570 |
| Ti | -0.727063 | -0.298747 | 22.651450 |
| O  | -1.691482 | -0.128853 | 24.355668 |
| O  | -2.631160 | 1.189402  | 26.923045 |
| Ti | -1.137317 | 0.061374  | 26.257644 |
| O  | 0.760704  | -0.937064 | 26.769364 |
| O  | 1.060841  | -1.246766 | 22.757149 |
| Ti | -3.137473 | 3.749927  | 22.920603 |
| O  | -3.406501 | 4.629272  | 24.582888 |
| Ti | -2.971043 | 3.257775  | 25.909827 |
| O  | -2.565079 | 2.214091  | 24.272811 |
| O  | -1.554375 | 3.953060  | 27.103884 |
| O  | -1.212596 | 3.925474  | 22.399655 |
| O  | 0.232612  | 1.395439  | 22.758347 |
| Ti | 0.709056  | 3.337038  | 22.860551 |
| O  | 0.217848  | 3.846390  | 24.608130 |
| O  | 0.117766  | 1.617148  | 26.283777 |
| Ti | 0.476922  | 3.653417  | 26.443852 |
| O  | 1.752274  | 5.120597  | 26.525434 |
| O  | 2.515041  | 2.577518  | 26.666933 |
| O  | 2.675588  | 2.455971  | 23.091936 |
| O  | 1.902028  | 4.919824  | 22.318225 |
| O  | 3.922112  | 4.680125  | 24.601407 |
| Ti | 3.696293  | 4.043661  | 22.838170 |
| Ti | 3.470583  | 4.306314  | 26.428492 |
| Ti | 1.993928  | 0.606616  | 26.436647 |
| O  | 2.326048  | 0.273700  | 24.668976 |
| Ti | 2.246213  | 0.413198  | 22.778035 |
| Ti | -7.016007 | -5.346434 | 22.590011 |
| Ti | -6.398551 | -5.074541 | 25.345913 |
| O  | -6.909196 | -3.514336 | 22.301569 |
| Ti | -5.936294 | -1.827220 | 22.384067 |
| O  | -6.708419 | -1.271247 | 24.029371 |
| O  | -6.565271 | -3.332288 | 25.797871 |
| Ti | -6.002353 | -1.435942 | 25.745766 |
| O  | -5.293478 | -5.450827 | 23.778712 |

|    |           |           |           |
|----|-----------|-----------|-----------|
| O  | -5.192890 | 0.079823  | 22.272048 |
| O  | -4.191325 | -2.670892 | 22.163730 |
| Ti | -2.568203 | -3.781564 | 22.721061 |
| O  | -7.915999 | -5.557632 | 24.245573 |
| O  | -3.061542 | -3.517281 | 24.488072 |
| O  | -4.445617 | -2.242859 | 26.761624 |
| Ti | -2.850609 | -3.407967 | 26.362752 |
| Ti | -4.306996 | -7.197102 | 22.788747 |
| O  | -6.242639 | -7.120962 | 21.971206 |
| O  | -3.267995 | -5.454843 | 26.286883 |
| O  | -2.395104 | -8.078023 | 26.635773 |
| O  | -4.675736 | -7.834668 | 24.657217 |
| Ti | -4.126036 | -7.165128 | 26.267767 |
| O  | -5.860406 | -6.081341 | 26.900961 |
| O  | -3.205039 | -5.611561 | 22.246489 |
| O  | 0.485437  | -7.899870 | 22.061690 |
| O  | 0.620035  | -7.101080 | 26.727466 |
| O  | -0.988781 | -4.469134 | 26.896312 |
| Ti | -1.168778 | -6.392404 | 26.303684 |
| O  | -0.977051 | -6.463978 | 24.502399 |
| O  | -0.715737 | -4.823720 | 22.574309 |
| Ti | -1.129071 | -6.879514 | 22.603000 |
| O  | -2.600718 | -8.095294 | 22.800178 |
| O  | -1.385255 | -2.206200 | 22.253331 |
| O  | -1.599818 | -1.889906 | 26.232953 |
| O  | 2.058554  | -3.606883 | 26.865419 |
| Ti | 0.272550  | -2.913502 | 26.419661 |
| O  | 0.430865  | -3.168027 | 24.587384 |
| O  | 2.217115  | -4.157967 | 22.142762 |
| Ti | 0.572036  | -3.293241 | 22.696874 |
| O  | 3.860442  | -0.377731 | 22.064966 |
| Ti | 5.614238  | -1.068088 | 22.705640 |
| O  | 5.437620  | -0.839334 | 24.537589 |
| O  | 3.770843  | 0.010240  | 27.009130 |
| Ti | 5.514337  | -0.695184 | 26.439485 |
| O  | 5.401582  | 3.836627  | 26.912741 |
| O  | 5.467377  | 3.424406  | 22.271699 |
| O  | 6.703490  | 0.666735  | 22.333284 |
| Ti | 7.267751  | 2.623047  | 22.675225 |
| O  | 6.983600  | 2.747756  | 24.500962 |
| O  | 6.681560  | 0.917037  | 26.519177 |
| Ti | 7.096668  | 2.936188  | 26.383873 |
| O  | 8.398457  | 4.403757  | 26.396517 |
| O  | 8.533441  | 4.175810  | 22.180587 |
| Ti | 4.059219  | -4.744012 | 22.665166 |
| O  | 3.821210  | -4.383232 | 24.456965 |
| Ti | 3.803439  | -4.300551 | 26.363943 |
| Ti | 2.449806  | -8.318876 | 22.532811 |
| O  | 3.344115  | -6.329874 | 26.088591 |
| O  | 2.002200  | -8.549890 | 24.403318 |
| Ti | 2.350474  | -7.944049 | 26.139434 |
| O  | 3.410599  | -6.630248 | 22.258603 |

|    |           |           |           |
|----|-----------|-----------|-----------|
| O  | 5.063594  | -3.025897 | 22.268237 |
| O  | 4.950944  | -2.706259 | 26.502960 |
| O  | 9.010035  | -2.466161 | 33.404783 |
| O  | 9.222809  | -2.656512 | 29.069636 |
| O  | 10.830768 | 0.969665  | 32.561183 |
| O  | 10.909501 | 0.948501  | 29.176195 |
| O  | 12.041079 | 3.262287  | 30.709330 |
| Ti | 11.862943 | 2.565921  | 28.954258 |
| Ti | 11.727444 | 2.626752  | 32.444000 |
| Ti | 10.203235 | -0.930499 | 32.893944 |
| O  | 10.277498 | -1.253177 | 31.094883 |
| Ti | 10.524985 | -1.120999 | 29.195456 |
| O  | 5.715168  | -8.994714 | 33.117097 |
| O  | 8.743828  | -9.281507 | 28.133850 |
| O  | 8.895466  | -8.131769 | 32.915115 |
| O  | 7.182349  | -5.882522 | 33.246257 |
| Ti | 7.045407  | -7.730732 | 32.504897 |
| O  | 7.249586  | -8.044496 | 30.692043 |
| O  | 7.441852  | -6.216849 | 28.980354 |
| Ti | 7.157436  | -8.305070 | 28.791930 |
| O  | 5.855059  | -9.746060 | 28.708674 |
| O  | 10.138109 | -5.161927 | 33.423066 |
| Ti | 8.493616  | -4.358220 | 32.871834 |
| O  | 8.487004  | -4.483500 | 31.045310 |
| O  | 10.202258 | -5.689460 | 28.504512 |
| Ti | 8.689354  | -4.626952 | 29.105453 |
| O  | 12.316169 | -1.673892 | 28.783514 |
| Ti | 14.084745 | -2.475798 | 29.498128 |
| O  | 13.308147 | -1.685457 | 31.195749 |
| O  | 11.760124 | -1.208751 | 33.916852 |
| Ti | 13.316592 | -1.752567 | 33.013039 |
| O  | 15.121697 | -2.746579 | 33.599672 |
| O  | 16.039603 | -3.496410 | 29.002261 |
| O  | 13.462112 | 2.416944  | 33.157335 |
| O  | 13.715441 | 2.038906  | 28.529814 |
| O  | 15.125644 | -0.772062 | 28.716214 |
| Ti | 15.451309 | 1.214352  | 28.917508 |
| O  | 15.207316 | 1.560872  | 30.750430 |
| O  | 14.679417 | -0.221020 | 33.308860 |
| Ti | 15.079185 | 1.566282  | 32.637530 |
| O  | 16.558371 | 2.812611  | 32.997177 |
| O  | 17.082457 | 0.299370  | 32.361755 |
| O  | 17.434065 | 0.213129  | 28.915902 |
| O  | 16.695732 | 2.772644  | 28.254747 |
| O  | 18.479444 | 2.598878  | 30.329917 |
| Ti | 18.421170 | 1.826355  | 28.599198 |
| O  | 20.062848 | 0.941023  | 28.005937 |
| Ti | 17.941846 | 1.979944  | 32.034307 |
| O  | 19.634161 | 1.380035  | 32.574677 |
| Ti | 20.113672 | -0.235437 | 31.705448 |
| Ti | 20.344791 | -0.838382 | 28.822352 |
| O  | 20.597249 | -1.437703 | 33.078090 |



|    |           |            |           |
|----|-----------|------------|-----------|
| Ti | 19.718330 | -3.104852  | 32.842677 |
| O  | 20.799539 | -3.597088  | 31.363165 |
| O  | 21.670267 | -2.240136  | 28.794985 |
| Ti | 20.721087 | -3.667000  | 29.514601 |
| O  | 18.897083 | -1.071007  | 30.397114 |
| O  | 19.397044 | -4.795499  | 33.593326 |
| O  | 17.961347 | -2.434538  | 32.886079 |
| Ti | 16.321983 | -1.512873  | 32.582533 |
| O  | 21.299081 | 0.038521   | 30.341535 |
| O  | 15.935855 | -1.825429  | 30.806881 |
| O  | 18.993122 | -2.916354  | 28.831333 |
| Ti | 17.187038 | -1.869035  | 29.184295 |
| Ti | 12.022050 | -5.904017  | 29.297270 |
| O  | 11.468622 | -4.530440  | 30.655766 |
| Ti | 11.685260 | -5.104187  | 32.385108 |
| Ti | 10.704317 | -9.572395  | 28.652448 |
| O  | 11.544326 | -6.993411  | 31.274699 |
| O  | 11.859648 | -9.008273  | 33.105869 |
| O  | 10.170740 | -9.623237  | 30.508202 |
| Ti | 10.440491 | -8.481909  | 31.949516 |
| O  | 11.592686 | -7.864227  | 28.562578 |
| Ti | 16.479862 | -8.235350  | 31.880649 |
| O  | 17.066649 | -9.388561  | 30.556233 |
| Ti | 17.043014 | -8.202845  | 28.993361 |
| O  | 16.003354 | -6.900299  | 30.609648 |
| O  | 15.529388 | -9.266466  | 28.189378 |
| O  | 15.084414 | -8.538598  | 33.104123 |
| O  | 13.462017 | -6.186593  | 32.858138 |
| Ti | 13.369209 | -8.119303  | 32.385139 |
| O  | 13.696703 | -8.973316  | 30.738268 |
| O  | 13.864507 | -6.862275  | 29.228562 |
| Ti | 13.618920 | -8.924168  | 28.839748 |
| O  | 12.395993 | -10.428414 | 28.660095 |
| O  | 13.286718 | -4.329003  | 28.831592 |
| O  | 12.782040 | -3.726402  | 33.263664 |
| Ti | 18.117595 | -5.733920  | 32.524088 |
| O  | 18.623202 | -5.332198  | 30.744213 |
| O  | 20.886621 | -5.365469  | 28.836855 |
| Ti | 19.066548 | -6.032912  | 28.967861 |
| O  | 18.964951 | -7.886886  | 29.062651 |
| O  | 18.024714 | -7.582163  | 32.772496 |
| O  | 16.405892 | -5.206973  | 33.136002 |
| Ti | 14.684369 | -4.546494  | 32.772463 |
| O  | 14.627597 | -4.250621  | 30.943069 |
| O  | 16.994950 | -6.081799  | 28.583766 |
| Ti | 15.225234 | -5.361178  | 29.298277 |
| Ti | -2.520969 | 0.664158   | 29.297708 |
| O  | -2.552214 | -0.084331  | 31.064396 |
| O  | -3.703684 | -0.896835  | 33.557852 |
| Ti | -2.342487 | 0.242332   | 32.888942 |
| O  | -2.221275 | 2.148302   | 32.954776 |
| O  | -3.002764 | 2.539251   | 29.053062 |

|    |           |           |           |
|----|-----------|-----------|-----------|
| O  | -1.052147 | -0.248683 | 28.452224 |
| Ti | 0.660269  | -0.983119 | 29.180392 |
| O  | 0.875711  | -0.648895 | 31.072764 |
| O  | -0.684414 | -0.225040 | 33.594355 |
| Ti | 0.987705  | -0.819811 | 32.907012 |
| O  | 2.821288  | -1.851183 | 33.346147 |
| O  | 2.551860  | -1.898358 | 29.012553 |
| Ti | -1.338407 | 3.450587  | 29.157305 |
| O  | -1.312432 | 4.374033  | 30.809030 |
| Ti | -0.818337 | 2.866728  | 31.926892 |
| O  | -0.786823 | 1.800155  | 30.305171 |
| O  | 0.724010  | 3.012570  | 32.929278 |
| O  | 0.560272  | 3.404007  | 28.572473 |
| O  | 1.840319  | 0.694293  | 28.728848 |
| Ti | 2.359962  | 2.646929  | 29.015676 |
| O  | 2.441769  | 2.753850  | 30.869633 |
| O  | 2.274135  | 0.676181  | 33.394350 |
| Ti | 2.603782  | 2.514617  | 32.732837 |
| O  | 3.892186  | 3.799254  | 33.345121 |
| O  | 4.579906  | 1.480377  | 32.378794 |
| O  | 4.322938  | 1.646509  | 29.111788 |
| O  | 3.572455  | 4.227135  | 28.561205 |
| O  | 5.650480  | 3.884556  | 30.760267 |
| Ti | 5.322260  | 3.259434  | 28.989132 |
| Ti | 5.485984  | 3.148630  | 32.474406 |
| Ti | 4.078220  | -0.418081 | 32.796040 |
| O  | 4.081446  | -0.763715 | 30.988509 |
| Ti | 3.830078  | -0.382917 | 29.134512 |
| Ti | -5.058479 | -5.675603 | 28.860298 |
| Ti | -4.537678 | -5.472890 | 31.639995 |
| O  | -5.480771 | -3.845241 | 28.666907 |
| Ti | -4.306219 | -2.316522 | 28.870899 |
| O  | -4.326317 | -2.053283 | 30.766985 |
| O  | -5.071937 | -3.987959 | 32.634914 |
| Ti | -3.889867 | -2.486052 | 32.532400 |
| O  | -3.410270 | -5.170821 | 30.085181 |
| O  | -4.180086 | -0.250485 | 28.601421 |
| O  | -2.664482 | -3.260907 | 28.528254 |
| Ti | -1.173354 | -4.420084 | 29.315397 |
| O  | -5.906065 | -6.123327 | 30.509192 |
| O  | -0.879166 | -3.012421 | 30.767623 |
| O  | -2.381096 | -3.491670 | 33.120354 |
| Ti | -0.728213 | -3.902731 | 32.350196 |
| Ti | -2.305872 | -8.096712 | 28.730606 |
| O  | -4.259999 | -7.485207 | 28.328781 |
| O  | -1.165736 | -5.621138 | 31.257074 |
| O  | -0.633686 | -7.887932 | 32.963467 |
| O  | -2.642583 | -8.432170 | 30.582693 |
| Ti | -2.012059 | -7.246689 | 31.866025 |
| O  | -3.615184 | -6.697519 | 32.715132 |
| O  | -1.483915 | -6.362399 | 28.597402 |
| O  | 2.229796  | -8.528272 | 28.207282 |

|    |           |           |           |
|----|-----------|-----------|-----------|
| O  | 2.584342  | -7.957893 | 33.211407 |
| O  | 0.901033  | -5.241904 | 32.968449 |
| Ti | 1.059320  | -7.111057 | 32.506255 |
| O  | 1.252064  | -7.357824 | 30.695130 |
| O  | 0.780286  | -5.403228 | 29.062834 |
| Ti | 0.689405  | -7.462628 | 28.847127 |
| O  | -0.615100 | -8.910481 | 28.787693 |
| O  | 0.171103  | -2.892740 | 28.624095 |
| O  | 0.504804  | -2.739794 | 33.369893 |
| O  | 3.843131  | -4.558688 | 33.526140 |
| Ti | 2.322039  | -3.721977 | 32.818506 |
| O  | 2.305007  | -3.783196 | 30.989910 |
| O  | 3.734365  | -4.815171 | 28.494156 |
| Ti | 2.090096  | -3.915425 | 29.046194 |
| O  | 5.628599  | -0.947431 | 28.622761 |
| Ti | 7.363999  | -1.679575 | 29.191017 |
| O  | 7.174172  | -1.366567 | 31.075877 |
| O  | 5.636883  | -0.789163 | 33.755318 |
| Ti | 7.209024  | -1.444792 | 32.928682 |
| O  | 7.138603  | 2.852630  | 33.278434 |
| O  | 7.157516  | 2.710923  | 28.573575 |
| O  | 8.474118  | -0.013659 | 28.761190 |
| Ti | 8.925865  | 1.935406  | 29.025803 |
| O  | 8.684908  | 2.078102  | 30.891997 |
| O  | 8.421591  | 0.161320  | 33.348047 |
| Ti | 8.817689  | 2.039352  | 32.752111 |
| O  | 10.161922 | 3.380051  | 33.210603 |
| O  | 10.129707 | 3.500081  | 28.515933 |
| Ti | 5.611564  | -5.228689 | 29.056019 |
| O  | 5.376421  | -4.387513 | 30.764809 |
| Ti | 5.455248  | -4.807910 | 32.566568 |
| Ti | 4.179134  | -8.880785 | 28.739941 |
| O  | 5.032437  | -6.705610 | 31.968727 |
| O  | 3.781647  | -9.188443 | 30.608671 |
| Ti | 4.161132  | -8.361021 | 32.223345 |
| O  | 5.030550  | -7.153409 | 28.622753 |
| O  | 6.741176  | -3.577834 | 28.678797 |
| O  | 6.630254  | -3.358412 | 33.252816 |

anatase-like 3-D (2,2,0)-mer

|    |          |          |           |
|----|----------|----------|-----------|
| O  | 2.140335 | 2.144863 | 2.139738  |
| O  | 2.104329 | 2.045978 | -2.613839 |
| O  | 4.255300 | 5.446783 | 1.939126  |
| O  | 4.219313 | 5.099780 | -1.513507 |
| O  | 5.738867 | 7.334269 | -0.069794 |
| Ti | 5.297432 | 6.622168 | -1.734773 |
| Ti | 5.278129 | 7.086745 | 1.765890  |
| Ti | 3.424996 | 3.618195 | 1.643779  |
| O  | 3.461801 | 2.932242 | -0.111025 |
| Ti | 3.466991 | 3.313961 | -1.942402 |
| O  | 5.005757 | 2.722227 | -2.850024 |
| Ti | 6.480999 | 1.837112 | -2.101213 |

|    |           |           |           |
|----|-----------|-----------|-----------|
| O  | 6.520628  | 1.921010  | -0.252432 |
| O  | 5.143959  | 2.849387  | 2.239702  |
| Ti | 6.685299  | 1.796371  | 1.665822  |
| O  | 8.507919  | 0.587880  | 2.189376  |
| O  | 8.204444  | 0.669426  | -2.623437 |
| O  | 7.146399  | 6.486664  | 2.312132  |
| O  | 6.863058  | 6.067348  | -2.641106 |
| O  | 7.968967  | 3.202905  | -2.492794 |
| Ti | 8.348271  | 5.059314  | -2.043614 |
| O  | 8.180394  | 5.178912  | -0.186873 |
| O  | 8.093775  | 3.255024  | 1.728576  |
| Ti | 8.536683  | 5.256554  | 1.659768  |
| O  | 9.980929  | 6.573452  | 1.704977  |
| O  | 10.537773 | 3.922606  | 1.917126  |
| O  | 10.310001 | 3.621938  | -1.420008 |
| O  | 9.976522  | 5.973096  | -2.596076 |
| O  | 11.963942 | 5.970266  | -0.137024 |
| Ti | 11.380772 | 5.127814  | -1.677147 |
| O  | 13.010928 | 4.334327  | -2.316234 |
| Ti | 11.540353 | 5.573168  | 1.684568  |
| O  | 13.459049 | 4.841953  | 2.051383  |
| Ti | 14.125740 | 3.064382  | 1.425074  |
| Ti | 13.690510 | 2.904485  | -1.342649 |
| O  | 14.418532 | 1.196094  | 2.176047  |
| Ti | 12.886583 | -0.085468 | 1.752513  |
| O  | 12.740189 | -0.143622 | -0.129284 |
| O  | 13.842332 | 1.324768  | -2.291140 |
| Ti | 12.464489 | -0.007275 | -1.981162 |
| O  | 12.635178 | 2.665937  | 0.279031  |
| O  | 11.472651 | 1.089128  | 2.365705  |
| Ti | 9.839186  | 2.029243  | 1.698161  |
| O  | 15.154938 | 3.281706  | -0.123773 |
| O  | 9.695129  | 1.306369  | -0.046803 |
| O  | 11.044811 | 1.001030  | -2.657650 |
| Ti | 9.576597  | 1.832652  | -1.823567 |
| O  | 0.155018  | -1.181119 | 2.013497  |
| O  | 0.174082  | -1.288789 | -2.419824 |
| Ti | 1.447165  | 0.307293  | 1.627678  |
| O  | 1.605083  | 0.175046  | -0.246031 |
| Ti | 1.479772  | 0.185193  | -2.114497 |
| O  | -3.884223 | -7.874924 | 2.141154  |
| O  | -0.942699 | -7.461640 | -2.594979 |
| O  | -0.915998 | -7.349896 | 2.177342  |
| O  | -1.893267 | -4.559436 | 2.054029  |
| Ti | -2.554072 | -6.423701 | 1.671197  |
| O  | -2.380688 | -6.539517 | -0.183813 |
| O  | -1.938845 | -4.627843 | -2.524421 |
| Ti | -2.497320 | -6.460753 | -2.059168 |
| O  | -4.015224 | -7.583780 | -2.550663 |
| O  | 1.026483  | -3.930115 | 2.228936  |
| Ti | -0.589351 | -3.023120 | 1.608490  |
| O  | -0.502254 | -3.261178 | -0.271003 |

|    |           |           |           |
|----|-----------|-----------|-----------|
| O  | 0.968212  | -3.962585 | -2.929681 |
| Ti | -0.532934 | -3.158762 | -2.144453 |
| O  | 2.977239  | -0.637378 | -2.882913 |
| Ti | 4.478756  | -1.449983 | -2.100445 |
| O  | 4.410378  | -1.497484 | -0.254664 |
| O  | 3.020375  | -0.698120 | 2.202937  |
| Ti | 4.683813  | -1.604283 | 1.648424  |
| O  | 6.602712  | -2.806617 | 1.992735  |
| O  | 6.312260  | -2.556129 | -2.519262 |
| O  | 5.807234  | -0.019149 | -2.401504 |
| O  | 6.016508  | -0.113833 | 1.698185  |
| O  | 12.641739 | -1.980197 | 1.870846  |
| Ti | 11.143767 | -3.105718 | 1.717674  |
| O  | 10.760906 | -2.880199 | -0.171188 |
| O  | 12.174068 | -1.763101 | -2.555922 |
| Ti | 10.690315 | -2.853358 | -2.014736 |
| O  | 11.017635 | -4.988826 | 1.882888  |
| O  | 9.478620  | -2.240390 | 2.267264  |
| Ti | 7.819883  | -1.282652 | 1.708327  |
| O  | 7.826474  | -1.274627 | -0.192456 |
| O  | 9.194110  | -1.997766 | -2.702607 |
| Ti | 7.623072  | -1.166166 | -2.041612 |
| Ti | 2.508954  | -4.546812 | -2.019834 |
| O  | 2.486222  | -4.331968 | -0.189327 |
| Ti | 2.673489  | -4.799926 | 1.658953  |
| Ti | 0.688440  | -7.957074 | -1.832535 |
| O  | 1.885946  | -6.707398 | 1.600536  |
| O  | 2.366446  | -9.386477 | 2.123925  |
| O  | 0.394137  | -8.707206 | -0.125737 |
| Ti | 0.753258  | -8.232527 | 1.672058  |
| O  | 1.742815  | -6.385374 | -1.738588 |
| Ti | 7.231633  | -8.515634 | 1.625994  |
| O  | 7.479739  | -9.469662 | 0.050478  |
| Ti | 6.977067  | -8.032795 | -1.145845 |
| O  | 6.709558  | -6.953409 | 0.501925  |
| O  | 5.466053  | -8.227524 | -2.181339 |
| O  | 5.341945  | -8.895849 | 2.099915  |
| O  | 4.463816  | -6.104696 | 2.046087  |
| Ti | 3.701623  | -7.941724 | 1.654817  |
| O  | 3.624450  | -7.953649 | -0.194505 |
| O  | 4.212204  | -5.811670 | -2.586111 |
| Ti | 3.615863  | -7.615192 | -2.051980 |
| O  | 2.205276  | -8.745141 | -2.712917 |
| O  | 3.895191  | -3.303091 | -2.663734 |
| O  | 4.160543  | -3.533214 | 1.783475  |
| Ti | 9.425581  | -6.029868 | 1.823722  |
| O  | 9.204421  | -5.777400 | -0.049678 |
| O  | 10.375893 | -4.667871 | -2.544718 |
| Ti | 8.956163  | -5.711292 | -1.913705 |
| O  | 8.498604  | -7.567884 | -2.108275 |
| O  | 9.015764  | -7.963090 | 2.325174  |
| O  | 7.696836  | -5.340708 | 2.374675  |

|    |            |           |           |
|----|------------|-----------|-----------|
| Ti | 5.956754   | -4.767608 | 1.593625  |
| O  | 5.746356   | -4.551697 | -0.306720 |
| O  | 7.339355   | -5.100499 | -2.642665 |
| Ti | 5.645300   | -4.411177 | -2.136480 |
| Ti | -8.978352  | 5.655319  | -2.371748 |
| O  | -9.397790  | 5.451686  | -0.540380 |
| O  | -11.351604 | 5.121911  | 1.660346  |
| Ti | -9.723244  | 5.935316  | 1.241314  |
| O  | -9.460048  | 7.719148  | 1.733436  |
| O  | -8.558700  | 7.511448  | -2.208911 |
| O  | -7.344290  | 5.053589  | -2.991608 |
| Ti | -5.732691  | 4.376865  | -2.213781 |
| O  | -5.877156  | 4.532130  | -0.412512 |
| O  | -8.209531  | 5.153955  | 2.090198  |
| Ti | -6.222442  | 4.897219  | 1.499270  |
| O  | -4.374794  | 3.715199  | 2.159266  |
| O  | -3.967259  | 3.281202  | -2.607616 |
| Ti | -7.100222  | 7.985188  | -1.134996 |
| O  | -7.563038  | 9.252555  | 0.205812  |
| Ti | -7.565781  | 8.081618  | 1.708420  |
| O  | -6.881855  | 6.708544  | 0.402334  |
| O  | -5.909243  | 8.742860  | 2.548295  |
| O  | -5.618288  | 8.232631  | -2.177887 |
| O  | -4.300996  | 5.822679  | -2.557716 |
| Ti | -3.782164  | 7.614040  | -1.878574 |
| O  | -3.983370  | 7.971158  | -0.043410 |
| O  | -4.751393  | 6.270765  | 1.886133  |
| Ti | -4.043903  | 8.276672  | 1.821749  |
| O  | -2.657190  | 9.612661  | 1.845625  |
| O  | -2.140066  | 6.942989  | 2.011979  |
| O  | -1.939863  | 6.404416  | -1.420036 |
| O  | -2.373559  | 8.721376  | -2.550418 |
| O  | -0.546111  | 8.738329  | -0.012927 |
| Ti | -0.847320  | 7.946317  | -1.676571 |
| Ti | -1.064296  | 8.572958  | 1.817480  |
| Ti | -3.003048  | 5.101912  | 1.677565  |
| O  | -2.814710  | 4.350822  | -0.043177 |
| Ti | -2.664295  | 4.587578  | -1.900260 |
| O  | -10.397405 | 4.671365  | -3.139801 |
| O  | -1.139604  | 4.040607  | -2.837703 |
| Ti | 0.372047   | 3.177380  | -2.118356 |
| O  | 0.306848   | 3.328751  | -0.282636 |
| O  | -1.261036  | 4.354726  | 2.236697  |
| Ti | 0.309139   | 3.376310  | 1.655901  |
| O  | 0.822195   | 7.966373  | 2.315453  |
| O  | 0.707186   | 7.421564  | -2.555562 |
| O  | 1.811549   | 4.605794  | -2.525450 |
| Ti | 2.281138   | 6.445506  | -2.006426 |
| O  | 2.089224   | 6.610007  | -0.165525 |
| O  | 1.702061   | 4.827000  | 1.732142  |
| Ti | 2.289824   | 6.821645  | 1.706161  |
| O  | 3.725410   | 8.128049  | 1.784718  |

|    |            |           |           |
|----|------------|-----------|-----------|
| O  | 3.821787   | 7.469970  | -2.574614 |
| Ti | -10.789848 | 2.919582  | -2.513183 |
| O  | -11.082777 | 3.088037  | -0.640827 |
| O  | -12.946979 | 2.454711  | 1.754138  |
| Ti | -11.347677 | 3.295963  | 1.203945  |
| O  | -9.270941  | 1.966577  | -2.891818 |
| Ti | -7.727163  | 1.122281  | -2.120587 |
| O  | -8.029959  | 1.273577  | -0.324515 |
| O  | -9.881295  | 2.435704  | 2.023505  |
| Ti | -8.163249  | 1.507143  | 1.615495  |
| O  | -6.245585  | 0.340418  | 2.015322  |
| O  | -5.910170  | -0.031251 | -2.290698 |
| O  | -6.409366  | 2.510724  | -2.607596 |
| O  | -6.817479  | 2.927553  | 1.510773  |
| Ti | -4.975857  | 1.861128  | 1.612813  |
| O  | -4.593133  | 1.559075  | -0.213145 |
| Ti | -4.610451  | 1.441645  | -2.084110 |
| Ti | -13.551961 | -2.698569 | -0.947427 |
| Ti | -13.696187 | -2.283267 | 1.886322  |
| O  | -13.765531 | -1.288750 | -2.145045 |
| Ti | -12.429860 | 0.089186  | -2.310524 |
| O  | -12.542638 | 0.551958  | -0.475290 |
| O  | -14.361399 | -0.468569 | 1.920168  |
| Ti | -12.972579 | 0.640333  | 1.341919  |
| O  | -12.237383 | -2.266201 | 0.477370  |
| O  | -12.232872 | 1.796706  | -3.077628 |
| O  | -11.077948 | -0.966599 | -3.006195 |
| Ti | -9.678741  | -1.901461 | -2.123984 |
| O  | -14.827995 | -2.822491 | 0.426727  |
| O  | -9.802993  | -1.509375 | -0.350405 |
| O  | -11.564091 | -0.366746 | 2.163572  |
| Ti | -10.233348 | -1.788607 | 1.507113  |
| Ti | -11.587103 | -5.212198 | -1.463391 |
| O  | -13.239435 | -4.320469 | -1.817332 |
| O  | -10.727705 | -3.781459 | 1.717214  |
| O  | -10.247534 | -6.383406 | 2.287291  |
| O  | -12.145826 | -5.902772 | 0.218043  |
| Ti | -11.883132 | -5.272349 | 1.960698  |
| O  | -13.420134 | -4.133712 | 2.612229  |
| O  | -10.541996 | -3.678629 | -1.844353 |
| O  | -7.168196  | -6.173068 | -2.497902 |
| O  | -7.199085  | -5.842801 | 2.201276  |
| O  | -8.332465  | -3.022525 | 2.034198  |
| Ti | -8.849720  | -4.944698 | 1.755795  |
| O  | -8.683601  | -5.119270 | -0.096310 |
| O  | -8.063583  | -3.317263 | -2.512154 |
| Ti | -8.646931  | -5.116227 | -1.983330 |
| O  | -10.261449 | -6.203655 | -2.332852 |
| O  | -8.263544  | -0.720107 | -2.813739 |
| O  | -8.783150  | -0.388675 | 1.703606  |
| O  | -5.383246  | -2.456196 | 2.197021  |
| Ti | -7.001910  | -1.515077 | 1.583490  |

|    |           |           |           |
|----|-----------|-----------|-----------|
| O  | -6.725267 | -1.913987 | -0.252673 |
| O  | -5.165094 | -2.712565 | -2.941643 |
| Ti | -6.626408 | -1.888002 | -2.128834 |
| O  | -3.139649 | 0.616132  | -2.887884 |
| Ti | -1.625392 | -0.163946 | -2.093997 |
| O  | -1.784533 | -0.116473 | -0.260801 |
| O  | -3.363430 | 0.925891  | 2.224588  |
| Ti | -1.732011 | 0.022861  | 1.672301  |
| O  | -0.321016 | 1.304193  | -2.455780 |
| O  | -0.369548 | 1.459843  | 1.646312  |
| Ti | -3.621314 | -3.320708 | -2.037576 |
| O  | -3.721474 | -3.048062 | -0.221917 |
| Ti | -3.740321 | -3.318335 | 1.673393  |
| Ti | -5.489598 | -6.687095 | -1.776197 |
| O  | -4.413947 | -5.262559 | 1.553803  |
| O  | -5.866621 | -7.361111 | -0.054616 |
| Ti | -5.527361 | -6.788353 | 1.706821  |
| O  | -4.442102 | -5.138136 | -1.812519 |
| O  | -2.246552 | -2.041806 | -2.647870 |
| O  | -2.369094 | -1.903953 | 1.788626  |
| O  | 3.689734  | 1.226272  | 8.727281  |
| O  | 3.813540  | 1.088257  | 4.290755  |
| O  | 5.885261  | 4.323178  | 7.895253  |
| O  | 5.857695  | 4.447781  | 4.526753  |
| O  | 7.310372  | 6.546779  | 6.133684  |
| Ti | 6.970799  | 5.973981  | 4.372975  |
| Ti | 6.931514  | 5.872619  | 7.855860  |
| Ti | 5.064381  | 2.505534  | 8.118192  |
| O  | 5.164240  | 2.234499  | 6.302113  |
| Ti | 5.184702  | 2.503174  | 4.406218  |
| O  | 6.826745  | 1.640306  | 3.882253  |
| Ti | 8.445697  | 0.699584  | 4.496119  |
| O  | 8.168626  | 1.098370  | 6.331971  |
| O  | 6.609324  | 1.897075  | 9.021162  |
| Ti | 8.070563  | 1.073571  | 8.208373  |
| O  | 9.707281  | -0.095162 | 8.893832  |
| O  | 10.227146 | -0.425719 | 4.375794  |
| O  | 8.610768  | 5.360044  | 8.576136  |
| O  | 8.642612  | 5.028407  | 3.878993  |
| O  | 9.774743  | 2.208224  | 4.045881  |
| Ti | 10.292997 | 4.130226  | 4.324517  |
| O  | 10.127389 | 4.304519  | 6.177067  |
| O  | 9.506920  | 2.503771  | 8.591735  |
| Ti | 10.089959 | 4.303242  | 8.064335  |
| O  | 11.705080 | 5.390176  | 8.413266  |
| O  | 11.986297 | 2.865097  | 7.927479  |
| O  | 12.170408 | 2.968027  | 4.362532  |
| O  | 11.690120 | 5.569242  | 3.792999  |
| O  | 13.589377 | 5.088761  | 5.862662  |
| Ti | 13.325947 | 4.459145  | 4.119734  |
| O  | 14.863443 | 3.320255  | 3.467778  |
| Ti | 13.030972 | 4.398381  | 7.544880  |



|    |           |           |          |
|----|-----------|-----------|----------|
| O  | 14.683371 | 3.507867  | 7.898880 |
| Ti | 14.995378 | 1.885269  | 7.028714 |
| Ti | 15.138540 | 1.470834  | 4.194733 |
| O  | 15.209154 | 0.474619  | 8.224782 |
| Ti | 13.873474 | -0.902625 | 8.390780 |
| O  | 13.985336 | -1.364896 | 6.555161 |
| O  | 15.804327 | -0.343810 | 4.161630 |
| Ti | 14.415629 | -1.452971 | 4.737545 |
| O  | 13.680166 | 1.454249  | 5.604405 |
| O  | 12.521255 | 0.152153  | 9.086931 |
| Ti | 11.122404 | 1.088432  | 8.205193 |
| O  | 16.270764 | 2.010035  | 5.654037 |
| O  | 11.245443 | 0.697464  | 6.431024 |
| O  | 13.008344 | -0.443442 | 3.916897 |
| Ti | 11.675770 | 0.975789  | 4.573608 |
| O  | 1.764703  | -2.118963 | 8.535090 |
| O  | 1.814009  | -2.275078 | 4.432293 |
| Ti | 3.069378  | -0.651217 | 8.172638 |
| O  | 3.228438  | -0.699402 | 6.339358 |
| Ti | 3.176395  | -0.838422 | 4.406276 |
| O  | -2.377146 | -8.283457 | 8.654372 |
| O  | 0.621562  | -8.781483 | 3.763874 |
| O  | 0.737645  | -8.234869 | 8.635202 |
| O  | -0.367246 | -5.419993 | 8.603963 |
| Ti | -0.839857 | -7.259618 | 8.085719 |
| O  | -0.645192 | -7.424687 | 6.244730 |
| O  | -0.258098 | -5.641683 | 4.347386 |
| Ti | -0.846166 | -7.636012 | 4.372739 |
| O  | -2.281378 | -8.942794 | 4.295310 |
| O  | 2.583957  | -4.854646 | 8.915667 |
| Ti | 1.071802  | -3.991471 | 8.197110 |
| O  | 1.136634  | -4.142080 | 6.361397 |
| O  | 2.705352  | -5.169944 | 3.842942 |
| Ti | 1.134986  | -4.191809 | 4.422691 |
| O  | 4.806900  | -1.742873 | 3.854247 |
| Ti | 6.420223  | -2.678387 | 4.465295 |
| O  | 6.037110  | -2.374250 | 6.290611 |
| O  | 4.583714  | -1.431020 | 8.967011 |
| Ti | 6.054189  | -2.255801 | 8.161837 |
| O  | 7.852510  | -3.326310 | 8.685899 |
| O  | 8.261981  | -3.741894 | 4.569636 |
| O  | 7.688897  | -1.156289 | 4.063123 |
| O  | 7.353941  | -0.784250 | 8.369407 |
| O  | 13.677245 | -2.610557 | 9.158093 |
| Ti | 12.234444 | -3.732689 | 8.594079 |
| O  | 12.527297 | -3.902687 | 6.721026 |
| O  | 14.390848 | -3.267095 | 4.326519 |
| Ti | 12.792658 | -4.108709 | 4.876987 |
| O  | 11.841839 | -5.486536 | 9.221183 |
| O  | 10.714407 | -2.781308 | 8.971686 |
| Ti | 9.171077  | -1.936741 | 8.200201 |
| O  | 9.473910  | -2.087365 | 6.403911 |

|    |           |            |          |
|----|-----------|------------|----------|
| O  | 11.326250 | -3.248604  | 4.056824 |
| Ti | 9.607124  | -2.321439  | 4.463951 |
| Ti | 4.447924  | -5.917799  | 4.399261 |
| O  | 4.259984  | -5.166175  | 6.120817 |
| Ti | 4.108230  | -5.401600  | 7.977905 |
| Ti | 2.508806  | -9.387929  | 4.262263 |
| O  | 3.383747  | -7.218782  | 7.498338 |
| O  | 3.818149  | -9.534819  | 8.630069 |
| O  | 1.990169  | -9.553737  | 6.092906 |
| Ti | 2.291839  | -8.760665  | 7.756424 |
| O  | 3.584337  | -7.758751  | 4.068098 |
| Ti | 8.545907  | -8.798581  | 7.214602 |
| O  | 9.010241  | -10.066093 | 5.874385 |
| Ti | 9.012349  | -8.895929  | 4.371323 |
| O  | 8.327300  | -7.522626  | 5.676858 |
| O  | 7.355067  | -9.556122  | 3.532258 |
| O  | 7.062778  | -9.046041  | 8.255718 |
| O  | 5.744328  | -6.636825  | 8.637496 |
| Ti | 5.226332  | -8.427937  | 7.958091 |
| O  | 5.427180  | -8.784968  | 6.122381 |
| O  | 6.196849  | -7.086460  | 4.190196 |
| Ti | 5.487894  | -9.092117  | 4.257543 |
| O  | 4.101247  | -10.427994 | 4.233743 |
| O  | 5.820194  | -4.531403  | 3.917716 |
| O  | 5.410678  | -4.095404  | 8.685269 |
| Ti | 10.423341 | -6.468866  | 8.452014 |
| O  | 10.843776 | -6.267308  | 6.620786 |
| O  | 12.797254 | -5.935209  | 4.420075 |
| Ti | 11.169050 | -6.748631  | 4.839839 |
| O  | 10.906543 | -8.532768  | 4.346013 |
| O  | 10.003189 | -8.325108  | 8.289973 |
| O  | 8.788377  | -5.867058  | 9.070276 |
| Ti | 7.176128  | -5.189759  | 8.292509 |
| O  | 7.319393  | -5.347761  | 6.491374 |
| O  | 9.656127  | -5.966436  | 3.990618 |
| Ti | 7.667742  | -5.712456  | 4.579444 |
| Ti | -7.976823 | 5.218289   | 4.257200 |
| O  | -7.757972 | 4.967111   | 6.130991 |
| O  | -8.928891 | 3.856579   | 8.625717 |
| Ti | -7.509792 | 4.901263   | 7.994499 |
| O  | -7.053269 | 6.758077   | 8.191955 |
| O  | -7.569273 | 7.151643   | 3.755848 |
| O  | -6.249521 | 4.526656   | 3.705356 |
| Ti | -4.510640 | 3.944460   | 4.483266 |
| O  | -4.304031 | 3.737350   | 6.383429 |
| O  | -5.893241 | 4.289102   | 8.723382 |
| Ti | -4.201175 | 3.597024   | 8.214145 |
| O  | -2.451442 | 2.488858   | 8.742490 |
| O  | -2.714756 | 2.715399   | 4.294459 |
| Ti | -5.786594 | 7.710740   | 4.458224 |
| O  | -6.033285 | 8.664146   | 6.032692 |
| Ti | -5.532637 | 7.226435   | 7.229591 |

|    |            |           |          |
|----|------------|-----------|----------|
| O  | -5.268600  | 6.147431  | 5.582967 |
| O  | -4.020217  | 7.418221  | 8.263646 |
| O  | -3.897480  | 8.080408  | 3.979693 |
| O  | -3.020605  | 5.287656  | 4.032852 |
| Ti | -2.257618  | 7.124980  | 4.423198 |
| O  | -2.179363  | 7.136757  | 6.272652 |
| O  | -2.768365  | 4.997831  | 8.663071 |
| Ti | -2.172634  | 6.802153  | 8.130452 |
| O  | -0.760976  | 7.932606  | 8.791983 |
| O  | -0.301186  | 5.571082  | 7.819945 |
| O  | -0.441772  | 5.891565  | 4.478613 |
| O  | -0.922258  | 8.570705  | 3.955269 |
| O  | 1.049015   | 7.891286  | 6.204305 |
| Ti | 0.689692   | 7.416774  | 4.407882 |
| Ti | 0.754061   | 7.144238  | 7.912242 |
| Ti | -1.064120  | 3.732486  | 8.099007 |
| O  | -1.042140  | 3.516727  | 6.268152 |
| Ti | -1.229402  | 3.983302  | 4.420057 |
| O  | -9.568925  | 4.177022  | 4.197692 |
| O  | 0.418142   | 3.115065  | 3.850039 |
| Ti | 2.033700   | 2.207725  | 4.470430 |
| O  | 1.944886   | 2.445458  | 6.349740 |
| O  | 0.475098   | 3.148097  | 9.009193 |
| Ti | 1.976422   | 2.344073  | 8.223393 |
| O  | 2.386707   | 6.648275  | 8.674025 |
| O  | 2.360204   | 6.535146  | 3.901327 |
| O  | 3.337503   | 3.743591  | 4.024839 |
| Ti | 3.998463   | 5.608427  | 4.407139 |
| O  | 3.820748   | 5.722633  | 6.262324 |
| O  | 3.382093   | 3.812711  | 8.603382 |
| Ti | 3.939016   | 5.645654  | 8.138038 |
| O  | 5.455958   | 6.770651  | 8.627379 |
| O  | 5.327839   | 7.060538  | 3.939391 |
| Ti | -9.697139  | 2.294338  | 4.363120 |
| O  | -9.314408  | 2.068908  | 6.251069 |
| O  | -10.728067 | 0.951512  | 8.635993 |
| Ti | -9.243241  | 2.042274  | 8.095594 |
| O  | -8.033970  | 1.426105  | 3.811776 |
| Ti | -6.376770  | 0.465938  | 4.370917 |
| O  | -6.383398  | 0.459060  | 6.268492 |
| O  | -7.748306  | 1.184952  | 8.782930 |
| Ti | -6.178674  | 0.351979  | 8.120991 |
| O  | -4.363901  | -0.796803 | 8.479903 |
| O  | -4.573439  | -0.703271 | 4.381986 |
| O  | -5.157741  | 1.989244  | 4.085376 |
| O  | -4.868337  | 1.743304  | 8.596167 |
| Ti | -3.034752  | 0.636677  | 8.179083 |
| O  | -2.965678  | 0.682230  | 6.333469 |
| Ti | -3.240029  | 0.785950  | 4.430292 |
| Ti | -12.681401 | -3.876197 | 4.654755 |
| Ti | -12.244650 | -3.716745 | 7.422384 |
| O  | -12.974070 | -2.007801 | 3.904073 |

|    |            |           |          |
|----|------------|-----------|----------|
| Ti | -11.442585 | -0.724584 | 4.327526 |
| O  | -11.295776 | -0.668095 | 6.209688 |
| O  | -12.396587 | -2.136747 | 8.370465 |
| Ti | -11.019040 | -0.804375 | 8.060574 |
| O  | -11.190187 | -3.479374 | 5.800650 |
| O  | -11.196155 | 1.169954  | 4.210626 |
| O  | -10.030102 | -1.901699 | 3.714111 |
| Ti | -8.397703  | -2.843614 | 4.381920 |
| O  | -13.710545 | -4.092893 | 6.202871 |
| O  | -8.252194  | -2.120021 | 6.125859 |
| O  | -9.599674  | -1.812965 | 8.737494 |
| Ti | -8.132871  | -2.646368 | 7.902030 |
| Ti | -10.098515 | -6.387690 | 4.396066 |
| O  | -12.016289 | -5.654897 | 4.028726 |
| O  | -8.866803  | -4.435167 | 7.499455 |
| O  | -8.533263  | -6.786162 | 8.677028 |
| O  | -10.521224 | -6.784209 | 6.217326 |
| Ti | -9.937457  | -5.941253 | 7.756703 |
| O  | -11.567472 | -5.145902 | 8.395439 |
| O  | -9.095067  | -4.736686 | 4.162581 |
| O  | -5.702383  | -7.300732 | 3.768185 |
| O  | -5.418773  | -6.881193 | 8.721065 |
| O  | -6.525496  | -4.017215 | 8.572438 |
| Ti | -6.904448  | -5.873744 | 8.123718 |
| O  | -6.738694  | -5.994819 | 6.266936 |
| O  | -6.651605  | -4.070552 | 4.351775 |
| Ti | -7.094100  | -6.071896 | 4.420440 |
| O  | -8.538903  | -7.387763 | 4.375084 |
| O  | -7.065130  | -1.404111 | 3.889692 |
| O  | -6.760342  | -1.483593 | 8.702620 |
| O  | -3.561327  | -3.534917 | 8.928923 |
| Ti | -5.037223  | -2.651168 | 8.180654 |
| O  | -5.077749  | -2.737162 | 6.332067 |
| O  | -3.699829  | -3.663801 | 3.839808 |
| Ti | -5.242642  | -2.613362 | 4.413657 |
| O  | -1.576163  | -0.118676 | 3.875799 |
| Ti | -0.002560  | -1.122669 | 4.452286 |
| O  | -0.160695  | -0.989799 | 6.325477 |
| O  | -1.533521  | -0.176336 | 8.962182 |
| Ti | -0.035880  | -0.999304 | 8.194052 |
| O  | 1.289153   | 0.365911  | 4.064885 |
| O  | 1.270279   | 0.473719  | 8.499873 |
| Ti | -1.980969  | -4.432747 | 4.435316 |
| O  | -2.017626  | -3.745329 | 6.189768 |
| Ti | -2.023033  | -4.127590 | 8.021696 |
| Ti | -3.834124  | -7.900988 | 4.314608 |
| O  | -2.775581  | -5.913311 | 7.592667 |
| O  | -4.295320  | -8.148838 | 6.149351 |
| Ti | -3.852930  | -7.435507 | 7.815377 |
| O  | -2.810871  | -6.261525 | 4.140798 |
| O  | -0.696119  | -2.959992 | 3.938452 |
| O  | -0.660667  | -2.860260 | 8.693957 |

anatase-like 3-D (2,2,1)-mer

|    |           |           |           |
|----|-----------|-----------|-----------|
| O  | 2.097319  | 2.188440  | 1.974746  |
| O  | 2.052076  | 2.105615  | -2.749974 |
| O  | 4.192708  | 5.531968  | 1.861207  |
| O  | 4.133030  | 5.163034  | -1.494573 |
| O  | 5.685120  | 7.430154  | -0.122697 |
| Ti | 5.223473  | 6.673026  | -1.763192 |
| Ti | 5.241836  | 7.165553  | 1.716856  |
| Ti | 3.389639  | 3.695135  | 1.488420  |
| O  | 3.403828  | 2.917776  | -0.239665 |
| Ti | 3.406925  | 3.384265  | -2.048922 |
| O  | 4.926946  | 2.854096  | -3.019007 |
| Ti | 6.397197  | 1.940322  | -2.286427 |
| O  | 6.440917  | 1.998506  | -0.437205 |
| O  | 5.133833  | 2.944262  | 2.054138  |
| Ti | 6.640437  | 1.817938  | 1.472422  |
| O  | 8.458195  | 0.612382  | 1.951198  |
| O  | 8.094874  | 0.777295  | -2.863897 |
| O  | 7.124952  | 6.551449  | 2.236273  |
| O  | 6.791636  | 6.145745  | -2.671758 |
| O  | 7.876721  | 3.329420  | -2.663363 |
| Ti | 8.315868  | 5.159182  | -2.099138 |
| O  | 8.168242  | 5.240196  | -0.249562 |
| O  | 8.053326  | 3.295616  | 1.586302  |
| Ti | 8.526094  | 5.307830  | 1.614275  |
| O  | 10.044049 | 6.524049  | 1.702105  |
| O  | 10.554670 | 3.898102  | 1.838248  |
| O  | 10.237965 | 3.742926  | -1.629183 |
| O  | 9.922189  | 6.162469  | -2.599000 |
| O  | 11.969575 | 6.037862  | -0.158891 |
| Ti | 11.332014 | 5.268633  | -1.733704 |
| O  | 12.958100 | 4.535040  | -2.427541 |
| Ti | 11.624953 | 5.513480  | 1.640253  |
| O  | 13.565682 | 4.824503  | 2.135122  |
| Ti | 14.129221 | 3.059694  | 1.354756  |
| Ti | 13.588029 | 3.093364  | -1.408049 |
| O  | 14.295688 | 1.188708  | 1.681990  |
| Ti | 12.865919 | -0.055033 | 1.502774  |
| O  | 12.394480 | -0.075596 | -0.355201 |
| O  | 13.669988 | 1.501504  | -2.355282 |
| Ti | 12.297326 | 0.147534  | -2.193180 |
| O  | 12.525928 | 2.976849  | 0.194097  |
| O  | 11.347254 | 1.006084  | 2.093750  |
| Ti | 9.779954  | 2.073828  | 1.449512  |
| O  | 15.097629 | 3.372700  | -0.242471 |
| O  | 9.575440  | 1.426424  | -0.318820 |
| O  | 10.921595 | 1.155955  | -2.973419 |
| Ti | 9.476834  | 1.963967  | -2.092143 |
| O  | 0.115505  | -1.193430 | 1.823866  |
| O  | 0.135601  | -1.277249 | -2.596649 |
| Ti | 1.404487  | 0.329137  | 1.459470  |

|    |           |           |           |
|----|-----------|-----------|-----------|
| O  | 1.532956  | 0.192528  | -0.421660 |
| Ti | 1.428987  | 0.230638  | -2.288745 |
| O  | -4.039261 | -7.904210 | 2.074599  |
| O  | -0.981887 | -7.434432 | -2.657686 |
| O  | -0.992993 | -7.483583 | 2.013999  |
| O  | -1.972786 | -4.589962 | 1.860528  |
| Ti | -2.633726 | -6.484961 | 1.590009  |
| O  | -2.476593 | -6.577991 | -0.272446 |
| O  | -2.004976 | -4.635679 | -2.657389 |
| Ti | -2.564510 | -6.457474 | -2.145522 |
| O  | -4.083760 | -7.582378 | -2.647976 |
| O  | 0.942227  | -4.060309 | 1.989446  |
| Ti | -0.640993 | -3.040111 | 1.442149  |
| O  | -0.567816 | -3.255917 | -0.447754 |
| O  | 0.894373  | -3.999540 | -3.107057 |
| Ti | -0.582197 | -3.151873 | -2.314421 |
| O  | 2.905566  | -0.573334 | -3.109870 |
| Ti | 4.407219  | -1.380126 | -2.311046 |
| O  | 4.334410  | -1.442401 | -0.469457 |
| O  | 3.009579  | -0.677450 | 1.976627  |
| Ti | 4.681741  | -1.601799 | 1.420661  |
| O  | 6.577853  | -2.780625 | 1.768214  |
| O  | 6.226330  | -2.444703 | -2.777400 |
| O  | 5.715077  | 0.085895  | -2.573323 |
| O  | 5.999504  | -0.103564 | 1.487419  |
| O  | 12.773646 | -1.955942 | 1.684717  |
| Ti | 11.226778 | -3.020861 | 1.454784  |
| O  | 10.868607 | -2.826783 | -0.428471 |
| O  | 12.101312 | -1.605882 | -2.851463 |
| Ti | 10.671311 | -2.745219 | -2.279246 |
| O  | 11.122562 | -4.929152 | 1.632702  |
| O  | 9.562901  | -2.162219 | 2.009980  |
| Ti | 7.843393  | -1.286183 | 1.473282  |
| O  | 7.773243  | -1.233681 | -0.425595 |
| O  | 9.138910  | -1.885184 | -2.890331 |
| Ti | 7.546149  | -1.066819 | -2.266635 |
| Ti | 2.452476  | -4.500355 | -2.172053 |
| O  | 2.434496  | -4.214267 | -0.352962 |
| Ti | 2.675811  | -4.829264 | 1.451581  |
| Ti | 0.656742  | -7.913956 | -1.898647 |
| O  | 1.927777  | -6.753523 | 1.527864  |
| O  | 2.368762  | -9.441582 | 2.057855  |
| O  | 0.398815  | -8.720310 | -0.214251 |
| Ti | 0.773851  | -8.242026 | 1.586948  |
| O  | 1.732739  | -6.354464 | -1.726064 |
| Ti | 7.328881  | -8.270102 | 1.717452  |
| O  | 7.393409  | -9.256317 | 0.079039  |
| Ti | 6.905928  | -7.868884 | -1.111090 |
| O  | 6.565931  | -6.736393 | 0.490912  |
| O  | 5.433231  | -8.090939 | -2.216738 |
| O  | 5.409174  | -9.029084 | 2.022642  |
| O  | 4.432585  | -6.155775 | 1.808143  |

|    |            |           |           |
|----|------------|-----------|-----------|
| Ti | 3.778092   | -8.071322 | 1.510620  |
| O  | 3.579087   | -8.090880 | -0.319687 |
| O  | 4.116908   | -5.758257 | -2.753219 |
| Ti | 3.565180   | -7.561217 | -2.159222 |
| O  | 2.148307   | -8.656968 | -2.865157 |
| O  | 3.803801   | -3.241304 | -2.871397 |
| O  | 4.174591   | -3.553331 | 1.543128  |
| Ti | 9.477493   | -5.819132 | 1.458957  |
| O  | 9.074570   | -5.302326 | -0.347422 |
| O  | 10.315043  | -4.533338 | -2.866328 |
| Ti | 8.832530   | -5.483584 | -2.188697 |
| O  | 8.384656   | -7.344559 | -2.129831 |
| O  | 9.139993   | -7.689770 | 1.714224  |
| O  | 7.823705   | -5.031748 | 2.087506  |
| Ti | 5.952954   | -4.764426 | 1.322372  |
| O  | 5.712339   | -4.478848 | -0.590197 |
| O  | 7.243352   | -4.952065 | -3.043278 |
| Ti | 5.575932   | -4.322136 | -2.406904 |
| Ti | -9.034866  | 5.480755  | -2.035867 |
| O  | -9.377900  | 5.083134  | -0.226064 |
| O  | -11.617982 | 5.000144  | 1.588468  |
| Ti | -9.812431  | 5.648258  | 1.587862  |
| O  | -9.632882  | 7.501728  | 1.631066  |
| O  | -8.725726  | 7.338968  | -2.145907 |
| O  | -7.431609  | 4.940940  | -2.848403 |
| Ti | -5.717415  | 4.328502  | -2.343772 |
| O  | -5.707966  | 4.330689  | -0.527910 |
| O  | -7.791128  | 5.665503  | 2.029765  |
| Ti | -6.063562  | 4.908953  | 1.311444  |
| O  | -4.288915  | 3.691858  | 1.965372  |
| O  | -3.926142  | 3.265983  | -2.732531 |
| Ti | -7.166270  | 7.935730  | -1.264650 |
| O  | -7.746097  | 9.108899  | 0.091070  |
| Ti | -7.699017  | 7.871082  | 1.573703  |
| O  | -6.747739  | 6.645498  | 0.094031  |
| O  | -6.045083  | 8.780852  | 2.368905  |
| O  | -5.722159  | 8.244138  | -2.397073 |
| O  | -4.332770  | 5.821734  | -2.618653 |
| Ti | -3.920691  | 7.668321  | -1.968327 |
| O  | -4.106488  | 8.206509  | -0.165420 |
| O  | -4.628678  | 6.295802  | 1.617970  |
| Ti | -4.158100  | 8.328497  | 1.715885  |
| O  | -2.772116  | 9.666047  | 1.872735  |
| O  | -2.188180  | 7.016431  | 1.946552  |
| O  | -2.108060  | 6.452403  | -1.331066 |
| O  | -2.452740  | 8.701824  | -2.645830 |
| O  | -0.657483  | 8.819228  | -0.036699 |
| Ti | -0.977149  | 7.960531  | -1.668933 |
| Ti | -1.158010  | 8.653257  | 1.804234  |
| Ti | -2.915861  | 5.125824  | 1.513333  |
| O  | -2.691778  | 4.204656  | -0.138220 |
| Ti | -2.676481  | 4.607415  | -1.969853 |

|    |            |           |           |
|----|------------|-----------|-----------|
| O  | -10.430153 | 4.628389  | -3.023735 |
| O  | -1.146727  | 4.164986  | -2.952752 |
| Ti | 0.323127   | 3.214567  | -2.242543 |
| O  | 0.264253   | 3.337453  | -0.402797 |
| O  | -1.151882  | 4.554992  | 2.179120  |
| Ti | 0.292932   | 3.403849  | 1.536419  |
| O  | 0.738800   | 8.094019  | 2.321445  |
| O  | 0.577240   | 7.435074  | -2.552771 |
| O  | 1.763826   | 4.667296  | -2.606085 |
| Ti | 2.195299   | 6.504018  | -2.034591 |
| O  | 1.984489   | 6.702655  | -0.199174 |
| O  | 1.665189   | 4.882582  | 1.615212  |
| Ti | 2.201398   | 6.917408  | 1.677525  |
| O  | 3.661945   | 8.193276  | 1.748975  |
| O  | 3.738251   | 7.509181  | -2.614941 |
| Ti | -10.874292 | 2.827863  | -2.717307 |
| O  | -11.365420 | 2.959850  | -0.883229 |
| O  | -13.095090 | 2.382328  | 1.594195  |
| Ti | -11.536914 | 3.261272  | 0.945718  |
| O  | -9.328682  | 1.897638  | -3.078222 |
| Ti | -7.720022  | 1.117929  | -2.369789 |
| O  | -7.991531  | 1.328826  | -0.560205 |
| O  | -9.928389  | 2.516043  | 1.666479  |
| Ti | -8.190828  | 1.557672  | 1.358080  |
| O  | -6.336567  | 0.364668  | 1.821949  |
| O  | -5.922655  | -0.059408 | -2.523832 |
| O  | -6.374499  | 2.468015  | -2.886856 |
| O  | -6.830011  | 2.990837  | 1.402108  |
| Ti | -5.015991  | 1.863509  | 1.402429  |
| O  | -4.647929  | 1.451110  | -0.407842 |
| Ti | -4.606930  | 1.415879  | -2.286479 |
| Ti | -13.575700 | -2.760839 | -1.139998 |
| Ti | -13.660842 | -2.223238 | 1.715335  |
| O  | -13.820565 | -1.400565 | -2.406873 |
| Ti | -12.518719 | -0.003569 | -2.586900 |
| O  | -12.774816 | 0.532753  | -0.766223 |
| O  | -14.559183 | -0.492920 | 1.631239  |
| Ti | -13.209616 | 0.631148  | 1.031002  |
| O  | -12.226875 | -2.313684 | 0.216454  |
| O  | -12.273406 | 1.683559  | -3.382048 |
| O  | -11.117286 | -1.052361 | -3.193918 |
| Ti | -9.694165  | -1.923985 | -2.285077 |
| O  | -14.804352 | -2.853723 | 0.247696  |
| O  | -9.811529  | -1.443295 | -0.527057 |
| O  | -11.836312 | -0.485379 | 1.861233  |
| Ti | -10.285847 | -1.781256 | 1.305374  |
| Ti | -11.627381 | -5.227551 | -1.530237 |
| O  | -13.269325 | -4.409574 | -1.997932 |
| O  | -10.843770 | -3.736591 | 1.667114  |
| O  | -10.450609 | -6.344822 | 2.318547  |
| O  | -12.223448 | -5.855656 | 0.170117  |
| Ti | -12.041231 | -5.210980 | 1.923039  |



|    |            |           |           |
|----|------------|-----------|-----------|
| O  | -13.556652 | -4.056787 | 2.524587  |
| O  | -10.555303 | -3.703193 | -1.948984 |
| O  | -7.223654  | -6.181023 | -2.560694 |
| O  | -7.397308  | -5.951338 | 2.099033  |
| O  | -8.431775  | -3.012807 | 1.839739  |
| Ti | -9.017509  | -4.953294 | 1.688662  |
| O  | -8.822636  | -5.138970 | -0.163186 |
| O  | -8.095260  | -3.348008 | -2.623918 |
| Ti | -8.714113  | -5.131756 | -2.054164 |
| O  | -10.318278 | -6.248325 | -2.394149 |
| O  | -8.286579  | -0.743600 | -3.008521 |
| O  | -8.870491  | -0.322712 | 1.535583  |
| O  | -5.484448  | -2.468400 | 2.003391  |
| Ti | -7.092707  | -1.491410 | 1.403567  |
| O  | -6.786361  | -1.879732 | -0.428903 |
| O  | -5.207954  | -2.768584 | -3.119046 |
| Ti | -6.650546  | -1.899173 | -2.306997 |
| O  | -3.145808  | 0.595212  | -3.110129 |
| Ti | -1.647028  | -0.163882 | -2.266595 |
| O  | -1.818242  | -0.112844 | -0.434663 |
| O  | -3.387338  | 0.957687  | 2.045051  |
| Ti | -1.761024  | 0.023525  | 1.498760  |
| O  | -0.371931  | 1.343466  | -2.615662 |
| O  | -0.415902  | 1.485332  | 1.515111  |
| Ti | -3.667913  | -3.326163 | -2.180834 |
| O  | -3.799385  | -2.998486 | -0.374147 |
| Ti | -3.795992  | -3.320956 | 1.512376  |
| Ti | -5.544386  | -6.685518 | -1.838329 |
| O  | -4.507796  | -5.263285 | 1.485749  |
| O  | -5.944183  | -7.353893 | -0.122201 |
| Ti | -5.638277  | -6.765590 | 1.645910  |
| O  | -4.483347  | -5.141302 | -1.862948 |
| O  | -2.293383  | -2.046878 | -2.806144 |
| O  | -2.411999  | -1.908068 | 1.623092  |
| O  | 3.643752   | 1.363075  | 8.390319  |
| O  | 3.797215   | 1.119610  | 4.127824  |
| O  | 5.761619   | 4.679720  | 8.246601  |
| O  | 5.809145   | 4.522116  | 4.381050  |
| O  | 7.333598   | 6.551415  | 6.086631  |
| Ti | 6.966689   | 6.025703  | 4.322919  |
| Ti | 6.832444   | 6.298599  | 7.924047  |
| Ti | 4.917248   | 2.851120  | 7.925918  |
| O  | 5.104842   | 2.641724  | 6.116765  |
| Ti | 5.124174   | 2.580134  | 4.194339  |
| O  | 6.709686   | 1.592090  | 3.690268  |
| Ti | 8.360366   | 0.684955  | 4.238940  |
| O  | 8.200822   | 0.899642  | 6.069854  |
| O  | 6.602713   | 1.928933  | 8.476534  |
| Ti | 8.229331   | 0.964304  | 7.978221  |
| O  | 10.093693  | -0.268312 | 8.435645  |
| O  | 10.176292  | -0.444109 | 4.223454  |
| O  | 8.701751   | 5.586894  | 8.408340  |

|    |           |           |          |
|----|-----------|-----------|----------|
| O  | 8.619257  | 5.047055  | 3.784595 |
| O  | 9.705440  | 2.184838  | 3.796426 |
| Ti | 10.274452 | 4.084984  | 4.172664 |
| O  | 10.047981 | 4.129365  | 5.997850 |
| O  | 9.626944  | 2.427157  | 8.050953 |
| Ti | 10.172696 | 4.401202  | 7.867021 |
| O  | 11.683233 | 5.684803  | 7.713426 |
| O  | 12.138423 | 3.061101  | 8.158522 |
| O  | 12.195099 | 2.872872  | 4.260204 |
| O  | 11.737047 | 5.488866  | 3.767866 |
| O  | 13.818105 | 4.907710  | 5.869944 |
| Ti | 13.354720 | 4.368652  | 4.164328 |
| O  | 14.887813 | 3.098188  | 3.514550 |
| Ti | 13.210399 | 4.647766  | 7.707728 |
| O  | 15.089493 | 3.883262  | 8.131904 |
| Ti | 15.736915 | 2.087238  | 7.550829 |
| Ti | 15.493657 | 1.782721  | 4.755874 |
| O  | 15.898142 | 0.294235  | 8.425256 |
| Ti | 14.367453 | -1.130177 | 8.172613 |
| O  | 14.633707 | -1.302458 | 6.302608 |
| O  | 15.872204 | 0.073673  | 4.115939 |
| Ti | 14.532419 | -1.267040 | 4.457021 |
| O  | 14.327876 | 1.701962  | 6.287781 |
| O  | 12.963234 | 0.100555  | 8.634981 |
| Ti | 11.388032 | 1.186476  | 7.956023 |
| O  | 16.859017 | 2.275452  | 6.039560 |
| O  | 11.582537 | 0.884142  | 6.153512 |
| O  | 13.074597 | -0.244642 | 3.773574 |
| Ti | 11.545270 | 0.951419  | 4.250844 |
| O  | 1.635852  | -1.995540 | 8.356865 |
| O  | 1.777551  | -2.275893 | 4.145748 |
| Ti | 2.915046  | -0.489973 | 7.899829 |
| O  | 3.113343  | -0.668373 | 6.074397 |
| Ti | 3.143355  | -0.822819 | 4.148870 |
| O  | -2.417210 | -8.751052 | 8.302927 |
| O  | 0.654755  | -8.745967 | 3.697826 |
| O  | 0.656651  | -8.217363 | 8.333120 |
| O  | -0.380463 | -5.412524 | 8.357601 |
| Ti | -1.047082 | -7.291815 | 7.907559 |
| O  | -0.790339 | -7.416116 | 6.084104 |
| O  | -0.262921 | -5.694449 | 4.072928 |
| Ti | -0.902015 | -7.649800 | 4.207202 |
| O  | -2.377113 | -8.949858 | 4.196476 |
| O  | 2.595477  | -4.722109 | 8.406304 |
| Ti | 0.895175  | -3.849786 | 7.890567 |
| O  | 1.068458  | -4.141801 | 6.069642 |
| O  | 2.817039  | -5.016597 | 3.656312 |
| Ti | 1.104585  | -4.207382 | 4.158528 |
| O  | 4.784830  | -1.739500 | 3.639165 |
| Ti | 6.412430  | -2.682534 | 4.189567 |
| O  | 6.162361  | -2.505293 | 6.018280 |
| O  | 4.557633  | -1.437445 | 8.463004 |

|    |           |            |          |
|----|-----------|------------|----------|
| Ti | 6.194230  | -2.370233  | 7.932958 |
| O  | 8.070666  | -3.587527  | 8.318951 |
| O  | 8.285075  | -3.742701  | 4.347691 |
| O  | 7.727764  | -1.210364  | 3.778193 |
| O  | 7.607917  | -0.973090  | 7.972801 |
| O  | 13.966907 | -2.960989  | 8.396701 |
| Ti | 12.582082 | -4.284165  | 8.212184 |
| O  | 12.715544 | -4.275712  | 6.291367 |
| O  | 14.361516 | -3.089776  | 4.014561 |
| Ti | 12.875079 | -4.203343  | 4.439333 |
| O  | 12.341348 | -6.185175  | 8.698926 |
| O  | 10.955656 | -3.320516  | 8.586119 |
| Ti | 9.417539  | -2.138190  | 7.965853 |
| O  | 9.792551  | -2.291953  | 6.166863 |
| O  | 11.350689 | -3.284358  | 3.755238 |
| Ti | 9.653837  | -2.361553  | 4.236030 |
| Ti | 4.472616  | -5.973389  | 4.102360 |
| O  | 4.326831  | -5.863894  | 5.925592 |
| Ti | 4.156474  | -5.707325  | 7.848026 |
| Ti | 2.521834  | -9.449370  | 4.178666 |
| O  | 3.460144  | -7.661329  | 7.611025 |
| O  | 3.984672  | -10.232460 | 8.206673 |
| O  | 1.988685  | -9.735870  | 5.994385 |
| Ti | 2.290594  | -9.159341  | 7.759682 |
| O  | 3.679956  | -7.845130  | 3.924066 |
| Ti | 8.890973  | -9.824612  | 7.753995 |
| O  | 9.027801  | -10.771774 | 6.123429 |
| Ti | 9.062980  | -9.244631  | 4.938237 |
| O  | 9.010471  | -8.176118  | 6.578711 |
| O  | 7.634923  | -9.300574  | 3.685581 |
| O  | 7.033788  | -9.658480  | 8.247866 |
| O  | 5.981867  | -6.924872  | 8.335221 |
| Ti | 5.304213  | -8.762156  | 7.802927 |
| O  | 5.750461  | -8.872982  | 5.966766 |
| O  | 6.387606  | -7.142004  | 3.631022 |
| Ti | 5.544542  | -9.101263  | 4.122275 |
| O  | 4.160556  | -10.441690 | 4.180520 |
| O  | 5.816749  | -4.568925  | 3.679178 |
| O  | 5.524735  | -4.305329  | 7.958157 |
| Ti | 10.616566 | -7.195175  | 7.977235 |
| O  | 11.318914 | -6.779317  | 6.246202 |
| O  | 12.736229 | -6.008224  | 3.833028 |
| Ti | 11.227567 | -6.973380  | 4.407568 |
| O  | 10.738798 | -8.839427  | 4.231601 |
| O  | 10.656873 | -9.183931  | 8.412903 |
| O  | 9.020230  | -6.295583  | 8.523272 |
| Ti | 7.337164  | -5.433145  | 7.899301 |
| O  | 7.464616  | -5.759636  | 6.045953 |
| O  | 9.579714  | -6.233224  | 3.811009 |
| Ti | 7.701713  | -5.663503  | 4.176944 |
| Ti | -7.722047 | 5.570004   | 4.182651 |
| O  | -8.426242 | 5.154205   | 5.913272 |

|    |            |          |          |
|----|------------|----------|----------|
| O  | -9.841677  | 4.382476 | 8.327351 |
| Ti | -8.333876  | 5.347786 | 7.751755 |
| O  | -7.844167  | 7.213433 | 7.928151 |
| O  | -7.762583  | 7.558233 | 3.746947 |
| O  | -6.126988  | 4.668074 | 3.636277 |
| Ti | -4.443798  | 3.805946 | 4.260149 |
| O  | -4.571391  | 4.132666 | 6.113705 |
| O  | -6.685832  | 4.607606 | 8.348046 |
| Ti | -4.808410  | 4.036452 | 7.982601 |
| O  | -2.923265  | 2.941856 | 8.480417 |
| O  | -2.631275  | 2.677313 | 4.201078 |
| Ti | -5.997048  | 8.199706 | 4.406006 |
| O  | -6.132874  | 9.145493 | 6.036779 |
| Ti | -6.168177  | 7.618512 | 7.221198 |
| O  | -6.116010  | 6.549635 | 5.580999 |
| O  | -4.740758  | 7.673662 | 8.474705 |
| O  | -4.139641  | 8.032284 | 3.911563 |
| O  | -3.088340  | 5.297918 | 3.824302 |
| Ti | -2.410333  | 7.135349 | 4.356374 |
| O  | -2.857690  | 7.246655 | 6.192453 |
| O  | -3.493492  | 5.514899 | 8.528075 |
| Ti | -2.650798  | 7.473746 | 8.036980 |
| O  | -1.266771  | 8.814302 | 7.978642 |
| O  | -0.786374  | 6.217749 | 8.235382 |
| O  | -0.566799  | 6.034427 | 4.548494 |
| O  | -1.090572  | 8.605632 | 3.952803 |
| O  | 0.905084   | 8.108262 | 6.165178 |
| Ti | 0.603203   | 7.532235 | 4.399779 |
| Ti | 0.371752   | 7.822038 | 7.980939 |
| Ti | -1.579234  | 4.346401 | 8.056681 |
| O  | -1.433934  | 4.236809 | 6.233771 |
| Ti | -1.263029  | 4.080476 | 4.311013 |
| O  | -9.446782  | 4.559249 | 3.460427 |
| O  | 0.298016   | 3.095289 | 3.752884 |
| Ti | 1.997886   | 2.222495 | 4.268673 |
| O  | 1.824640   | 2.514292 | 6.089718 |
| O  | 0.076502   | 3.389722 | 8.502882 |
| Ti | 1.788652   | 2.580003 | 8.000758 |
| O  | 2.239000   | 7.119070 | 8.461799 |
| O  | 2.237007   | 6.590324 | 3.826055 |
| O  | 3.273793   | 3.785259 | 3.801804 |
| Ti | 3.940455   | 5.664520 | 4.251844 |
| O  | 3.683419   | 5.788665 | 6.075303 |
| O  | 3.156057   | 4.067138 | 8.086595 |
| Ti | 3.795225   | 6.022490 | 7.952147 |
| O  | 5.270523   | 7.322697 | 7.962825 |
| O  | 5.310552   | 7.123790 | 3.856541 |
| Ti | -9.687343  | 2.658356 | 3.947490 |
| O  | -9.820706  | 2.650476 | 5.868461 |
| O  | -11.467137 | 1.464207 | 8.144893 |
| Ti | -9.980535  | 2.577286 | 7.720368 |
| O  | -8.061489  | 1.694070 | 3.573882 |

|    |            |           |          |
|----|------------|-----------|----------|
| Ti | -6.523852  | 0.510886  | 4.193926 |
| O  | -6.899490  | 0.665457  | 5.992893 |
| O  | -8.456559  | 1.658433  | 8.404901 |
| Ti | -6.760447  | 0.734381  | 7.923686 |
| O  | -4.834607  | -0.416906 | 8.381307 |
| O  | -4.714403  | -0.654144 | 4.186772 |
| O  | -5.176953  | 1.960186  | 3.840734 |
| O  | -5.391841  | 2.115946  | 7.812265 |
| Ti | -3.519319  | 1.054770  | 7.969832 |
| O  | -3.269421  | 0.878620  | 6.141187 |
| Ti | -3.300761  | 0.743155  | 4.226450 |
| Ti | -12.843449 | -3.713239 | 4.609018 |
| Ti | -12.600393 | -3.408612 | 7.404020 |
| O  | -13.004479 | -1.920445 | 3.734094 |
| Ti | -11.473730 | -0.495642 | 3.987225 |
| O  | -11.741505 | -0.323278 | 5.857073 |
| O  | -12.978628 | -1.699543 | 8.044283 |
| Ti | -11.638657 | -0.358738 | 7.702550 |
| O  | -11.434424 | -3.328220 | 5.872180 |
| O  | -11.072007 | 1.334973  | 3.763798 |
| O  | -10.070218 | -1.727228 | 3.524983 |
| Ti | -8.494951  | -2.813259 | 4.203403 |
| O  | -13.965800 | -3.900789 | 6.120212 |
| O  | -8.689800  | -2.510395 | 6.005871 |
| O  | -10.181147 | -1.381313 | 8.385961 |
| Ti | -8.652504  | -2.578110 | 7.908449 |
| Ti | -10.317408 | -6.274684 | 4.451703 |
| O  | -12.196491 | -5.509281 | 4.027776 |
| O  | -9.302256  | -4.499591 | 7.899352 |
| O  | -8.844032  | -7.115656 | 8.391497 |
| O  | -10.925105 | -6.534432 | 6.289570 |
| Ti | -10.461716 | -5.995342 | 7.995063 |
| O  | -11.995015 | -4.725090 | 8.644832 |
| O  | -9.245411  | -4.687881 | 4.001179 |
| O  | -5.808446  | -7.213484 | 3.751307 |
| O  | -5.725715  | -6.673667 | 8.374748 |
| O  | -6.812817  | -3.811901 | 8.363019 |
| Ti | -7.381317  | -5.712120 | 7.986860 |
| O  | -7.155476  | -5.756424 | 6.161688 |
| O  | -6.734009  | -4.054145 | 4.108646 |
| Ti | -7.279798  | -6.028182 | 4.292367 |
| O  | -8.790335  | -7.311672 | 4.445627 |
| O  | -7.200422  | -1.358776 | 3.723919 |
| O  | -7.282890  | -1.182910 | 7.935730 |
| O  | -3.816530  | -3.219326 | 8.469008 |
| Ti | -5.467433  | -2.312283 | 7.920501 |
| O  | -5.307851  | -2.527143 | 6.089660 |
| O  | -3.709276  | -3.555686 | 3.682920 |
| Ti | -5.336190  | -2.591553 | 4.181216 |
| O  | -1.664044  | -0.189403 | 3.696409 |
| Ti | -0.021675  | -1.137350 | 4.259446 |
| O  | -0.220391  | -0.958972 | 6.084904 |

|    |           |           |           |
|----|-----------|-----------|-----------|
| O  | -1.891544 | 0.112356  | 8.520049  |
| Ti | -0.250202 | -0.804463 | 8.010375  |
| O  | 1.257407  | 0.368301  | 3.802355  |
| O  | 1.115751  | 0.648601  | 8.013632  |
| Ti | -2.024087 | -4.478391 | 4.233475  |
| O  | -2.211748 | -4.268956 | 6.042645  |
| Ti | -2.230968 | -4.207305 | 7.965057  |
| Ti | -3.939260 | -7.925637 | 4.235431  |
| O  | -2.915821 | -6.149357 | 7.778431  |
| O  | -4.440276 | -8.178478 | 6.072905  |
| Ti | -4.073234 | -7.652503 | 7.836656  |
| O  | -2.868042 | -6.306719 | 3.912786  |
| O  | -0.750470 | -2.990385 | 3.769012  |
| O  | -0.903863 | -2.746739 | 8.031551  |
| O  | 5.186458  | 0.419893  | 14.965281 |
| O  | 5.305529  | 0.281124  | 10.536542 |
| O  | 7.376521  | 3.515125  | 14.023022 |
| O  | 7.401173  | 3.636360  | 10.673769 |
| O  | 8.837401  | 5.727136  | 12.281882 |
| Ti | 8.531487  | 5.138845  | 10.513604 |
| Ti | 8.437356  | 5.058387  | 13.998329 |
| Ti | 6.560703  | 1.699448  | 14.340415 |
| O  | 6.692329  | 1.372462  | 12.533640 |
| Ti | 6.689265  | 1.693875  | 10.647023 |
| O  | 8.377765  | 0.841418  | 10.156071 |
| Ti | 9.985846  | -0.135679 | 10.756112 |
| O  | 9.679057  | 0.252021  | 12.588606 |
| O  | 8.100754  | 1.141507  | 15.278649 |
| Ti | 9.543077  | 0.272015  | 14.466713 |
| O  | 11.179418 | -0.883184 | 15.168628 |
| O  | 11.763989 | -1.304090 | 10.624316 |
| O  | 10.116558 | 4.554671  | 14.720454 |
| O  | 10.290494 | 4.324915  | 10.060364 |
| O  | 11.324634 | 1.385949  | 10.320060 |
| Ti | 11.910761 | 3.326587  | 10.470829 |
| O  | 11.714804 | 3.511878  | 12.322669 |
| O  | 10.986647 | 1.720990  | 14.783635 |
| Ti | 11.606617 | 3.504821  | 14.213548 |
| O  | 13.210497 | 4.622196  | 14.553549 |
| O  | 13.447614 | 2.076808  | 14.109831 |
| O  | 13.736569 | 2.110086  | 10.492369 |
| O  | 13.343463 | 4.718594  | 9.840957  |
| O  | 15.115811 | 4.229360  | 11.989916 |
| Ti | 14.934160 | 3.584850  | 10.236654 |
| O  | 16.449024 | 2.429545  | 9.636609  |
| Ti | 14.519698 | 3.601247  | 13.690432 |
| O  | 16.161417 | 2.784670  | 14.158446 |
| Ti | 16.468314 | 1.134934  | 13.300268 |
| Ti | 16.552960 | 0.596934  | 10.444753 |
| O  | 16.713608 | -0.224980 | 14.567266 |
| Ti | 15.412395 | -1.621858 | 14.746879 |
| O  | 15.667117 | -2.158095 | 12.926239 |

|    |           |            |           |
|----|-----------|------------|-----------|
| O  | 17.453090 | -1.132769  | 10.529056 |
| Ti | 16.103513 | -2.257317  | 11.128667 |
| O  | 15.119091 | 0.687672   | 11.944395 |
| O  | 14.010107 | -0.574202  | 15.353442 |
| Ti | 12.586830 | 0.297434   | 14.445265 |
| O  | 17.696484 | 1.228033   | 11.912220 |
| O  | 12.703649 | -0.182666  | 12.687088 |
| O  | 14.730900 | -1.139332  | 10.298558 |
| Ti | 13.178602 | 0.154976   | 10.854668 |
| O  | 3.265136  | -2.970608  | 14.774892 |
| O  | 3.308964  | -3.112601  | 10.644248 |
| Ti | 4.540107  | -1.463339  | 14.425851 |
| O  | 4.711569  | -1.514314  | 12.593982 |
| Ti | 4.654521  | -1.650833  | 10.660559 |
| O  | -0.844425 | -9.135852  | 14.774301 |
| O  | 2.155307  | -9.720880  | 9.837855  |
| O  | 2.316792  | -9.062321  | 14.711765 |
| O  | 1.129399  | -6.294541  | 14.764880 |
| Ti | 0.698859  | -8.131367  | 14.193810 |
| O  | 0.909207  | -8.330128  | 12.358383 |
| O  | 1.228223  | -6.509777  | 10.544171 |
| Ti | 0.692242  | -8.544614  | 10.481622 |
| O  | -0.768189 | -9.820309  | 10.410032 |
| O  | 4.039807  | -5.792104  | 15.112477 |
| Ti | 2.570154  | -4.841546  | 14.401709 |
| O  | 2.629149  | -4.964767  | 12.561943 |
| O  | 4.045592  | -6.181714  | 9.979963  |
| Ti | 2.600378  | -5.031090  | 10.622739 |
| O  | 6.280971  | -2.584769  | 10.114279 |
| Ti | 7.909131  | -3.490411  | 10.757278 |
| O  | 7.541408  | -3.077784  | 12.567506 |
| O  | 6.038697  | -2.222368  | 15.269725 |
| Ti | 7.499973  | -3.042714  | 14.445952 |
| O  | 9.267733  | -4.095003  | 15.046506 |
| O  | 9.723505  | -4.617810  | 10.757475 |
| O  | 9.229985  | -1.991482  | 10.337584 |
| O  | 8.815802  | -1.567586  | 14.684345 |
| O  | 15.167560 | -3.309224  | 15.541914 |
| Ti | 13.768714 | -4.453094  | 14.877115 |
| O  | 14.259521 | -4.585986  | 13.043658 |
| O  | 15.989130 | -4.007919  | 10.566045 |
| Ti | 14.430648 | -4.886752  | 11.214381 |
| O  | 13.324705 | -6.256148  | 15.184318 |
| O  | 12.222604 | -3.523869  | 15.237880 |
| Ti | 10.613485 | -2.745217  | 14.529862 |
| O  | 10.884453 | -2.955390  | 12.720091 |
| O  | 12.821962 | -4.142071  | 10.494126 |
| Ti | 11.084135 | -3.184510  | 10.802013 |
| Ti | 5.809328  | -6.752653  | 10.646674 |
| O  | 5.585182  | -5.831693  | 12.297879 |
| Ti | 5.569622  | -6.234504  | 14.128882 |
| Ti | 4.051998  | -10.280236 | 10.355240 |

|    |           |            |           |
|----|-----------|------------|-----------|
| O  | 5.001576  | -8.079517  | 13.488472 |
| O  | 5.347330  | -10.328899 | 14.805358 |
| O  | 3.551523  | -10.447343 | 12.196103 |
| Ti | 3.871247  | -9.588136  | 13.828111 |
| O  | 5.081572  | -8.643135  | 10.213532 |
| Ti | 10.061130 | -9.561633  | 13.424250 |
| O  | 10.640888 | -10.735287 | 12.068915 |
| Ti | 10.593803 | -9.497515  | 10.586085 |
| O  | 9.641779  | -8.272404  | 12.065027 |
| O  | 8.939650  | -10.407095 | 9.789384  |
| O  | 8.616575  | -9.869792  | 14.556256 |
| O  | 7.226170  | -7.448577  | 14.778432 |
| Ti | 6.814477  | -9.295236  | 14.127803 |
| O  | 6.999870  | -9.833023  | 12.324941 |
| O  | 7.521921  | -7.922552  | 10.541492 |
| Ti | 7.052117  | -9.955234  | 10.443456 |
| O  | 5.666478  | -11.292725 | 10.286181 |
| O  | 7.182386  | -5.318837  | 10.194035 |
| O  | 6.819393  | -4.893122  | 14.891820 |
| Ti | 11.929375 | -7.106505  | 14.195544 |
| O  | 12.272193 | -6.709114  | 12.386186 |
| O  | 14.512056 | -6.625977  | 10.571249 |
| Ti | 12.706423 | -7.274497  | 10.571801 |
| O  | 12.527322 | -9.127687  | 10.528732 |
| O  | 11.620696 | -8.964858  | 14.305288 |
| O  | 10.325702 | -6.566596  | 15.006978 |
| Ti | 8.610789  | -5.955933  | 14.503179 |
| O  | 8.601108  | -5.957630  | 12.687320 |
| O  | 10.685594 | -7.291155  | 10.130261 |
| Ti | 8.957023  | -6.536357  | 10.847955 |
| Ti | -6.583465 | 4.193032   | 10.701143 |
| O  | -6.179946 | 3.675633   | 12.507413 |
| O  | -7.420752 | 2.908385   | 15.026627 |
| Ti | -5.938564 | 3.857075   | 14.348695 |
| O  | -5.490727 | 5.718068   | 14.289756 |
| O  | -6.245778 | 6.063558   | 10.446050 |
| O  | -4.930295 | 3.405084   | 10.072013 |
| Ti | -3.059726 | 3.137360   | 10.837164 |
| O  | -2.819173 | 2.851555   | 12.749740 |
| O  | -4.349490 | 3.325607   | 15.203681 |
| Ti | -2.682786 | 2.693833   | 14.566537 |
| O  | -0.910504 | 1.614069   | 15.030514 |
| O  | -1.281388 | 1.925777   | 10.616316 |
| Ti | -4.434531 | 6.644159   | 10.443032 |
| O  | -4.498910 | 7.630224   | 12.081791 |
| Ti | -4.011719 | 6.242108   | 13.271342 |
| O  | -3.672124 | 5.109989   | 11.669042 |
| O  | -2.539286 | 6.464258   | 14.377202 |
| O  | -2.515131 | 7.402241   | 10.136752 |
| O  | -1.539475 | 4.528508   | 10.351122 |
| Ti | -0.884351 | 6.443798   | 10.648740 |
| O  | -0.685577 | 6.463279   | 12.478952 |



|    |            |           |           |
|----|------------|-----------|-----------|
| O  | -1.223604  | 4.131042  | 14.912839 |
| Ti | -0.671632  | 5.934011  | 14.318862 |
| O  | 0.746441   | 7.030396  | 15.024719 |
| O  | 1.161054   | 4.727310  | 13.886617 |
| O  | 0.965586   | 5.126321  | 10.631546 |
| O  | 0.524811   | 7.814271  | 10.101759 |
| O  | 2.494719   | 7.093109  | 12.374050 |
| Ti | 2.119806   | 6.614787  | 10.572305 |
| Ti | 2.236772   | 6.286694  | 14.058682 |
| Ti | 0.440773   | 2.873311  | 14.331751 |
| O  | 0.458185   | 2.587959  | 12.512490 |
| Ti | 0.217467   | 3.202075  | 10.707525 |
| O  | -8.228190  | 3.304199  | 10.527790 |
| O  | 1.950889   | 2.432929  | 10.169857 |
| Ti | 3.534294   | 1.412639  | 10.717234 |
| O  | 3.460493   | 1.628872  | 12.607063 |
| O  | 1.997940   | 2.372476  | 15.266697 |
| Ti | 3.475180   | 1.524691  | 14.473700 |
| O  | 3.875376   | 5.808039  | 14.817650 |
| O  | 3.886581   | 5.856479  | 10.145364 |
| O  | 4.866076   | 2.962581  | 10.298881 |
| Ti | 5.526931   | 4.857506  | 10.569727 |
| O  | 5.369887   | 4.950695  | 12.431676 |
| O  | 4.897997   | 3.008691  | 14.816973 |
| Ti | 5.457491   | 4.830471  | 14.304847 |
| O  | 6.976831   | 5.955877  | 14.807390 |
| O  | 6.932341   | 6.277113  | 10.084881 |
| Ti | -8.332687  | 1.394614  | 10.705373 |
| O  | -7.974095  | 1.200776  | 12.588804 |
| O  | -9.207121  | -0.020679 | 15.011431 |
| Ti | -7.777240  | 1.118258  | 14.439251 |
| O  | -6.669505  | 0.535264  | 10.149730 |
| Ti | -4.950174  | -0.341261 | 10.686296 |
| O  | -4.880647  | -0.393140 | 12.585025 |
| O  | -6.245168  | 0.258413  | 15.050799 |
| Ti | -4.653279  | -0.560563 | 14.426083 |
| O  | -2.822123  | -1.713465 | 14.732624 |
| O  | -3.106693  | -1.523686 | 10.671720 |
| O  | -3.684445  | 1.153470  | 10.391405 |
| O  | -3.333140  | 0.817974  | 14.936462 |
| Ti | -1.514272  | -0.247115 | 14.470144 |
| O  | -1.441362  | -0.168684 | 12.628450 |
| Ti | -1.788526  | -0.025594 | 10.738531 |
| Ti | -11.235896 | -4.685715 | 10.804197 |
| Ti | -10.694336 | -4.719778 | 13.566868 |
| O  | -11.402002 | -2.814744 | 10.477222 |
| Ti | -9.972106  | -1.570811 | 10.656905 |
| O  | -9.501133  | -1.550340 | 12.514923 |
| O  | -10.775927 | -3.128252 | 14.514620 |
| Ti | -9.403411  | -1.773412 | 14.353090 |
| O  | -9.632323  | -4.603312 | 11.964622 |
| O  | -9.879841  | 0.329150  | 10.475170 |

|    |            |           |           |
|----|------------|-----------|-----------|
| O  | -8.454041  | -2.632366 | 10.065552 |
| Ti | -6.887310  | -3.700712 | 10.710237 |
| O  | -12.204101 | -4.998583 | 12.401448 |
| O  | -6.682800  | -3.052753 | 12.478277 |
| O  | -8.028041  | -2.782839 | 15.133225 |
| Ti | -6.583921  | -3.591012 | 14.251297 |
| Ti | -8.732051  | -7.140249 | 10.519149 |
| O  | -10.672562 | -6.451022 | 10.024252 |
| O  | -7.345391  | -5.369952 | 13.788104 |
| O  | -7.029004  | -7.789078 | 14.758869 |
| O  | -9.076348  | -7.665303 | 12.318171 |
| Ti | -8.438522  | -6.895706 | 13.892995 |
| O  | -10.065357 | -6.162492 | 14.586134 |
| O  | -7.661980  | -5.525226 | 10.321245 |
| O  | -4.231373  | -8.178219 | 9.923362  |
| O  | -3.897752  | -7.772471 | 14.830781 |
| O  | -4.983750  | -4.956672 | 14.822408 |
| Ti | -5.422533  | -6.786415 | 14.258614 |
| O  | -5.275636  | -6.867589 | 12.408988 |
| O  | -5.160514  | -4.922712 | 10.573216 |
| Ti | -5.633116  | -6.934964 | 10.545091 |
| O  | -7.150933  | -8.150858 | 10.456834 |
| O  | -5.565065  | -2.239629 | 10.208103 |
| O  | -5.201821  | -2.404755 | 15.023295 |
| O  | -2.033371  | -4.481078 | 15.177986 |
| Ti | -3.504169  | -3.567383 | 14.445576 |
| O  | -3.548087  | -3.625876 | 12.596413 |
| O  | -2.240519  | -4.571311 | 10.105300 |
| Ti | -3.747454  | -3.445175 | 10.686823 |
| O  | -0.116310  | -0.949766 | 10.182602 |
| Ti | 1.488714   | -1.956408 | 10.699839 |
| O  | 1.360360   | -1.820104 | 12.580786 |
| O  | -0.012533  | -1.053795 | 15.268963 |
| Ti | 1.464117   | -1.857896 | 14.447857 |
| O  | 2.777886   | -0.433894 | 10.335318 |
| O  | 2.757490   | -0.349886 | 14.755773 |
| Ti | -0.496427  | -5.322057 | 10.670932 |
| O  | -0.510305  | -4.544033 | 12.398882 |
| Ti | -0.513632  | -5.011177 | 14.207846 |
| Ti | -2.348227  | -8.792709 | 10.442522 |
| O  | -1.239626  | -6.789905 | 13.652861 |
| O  | -2.791342  | -9.057497 | 12.282124 |
| Ti | -2.329672  | -8.299993 | 13.922131 |
| O  | -1.299403  | -7.159159 | 10.298341 |
| O  | 0.796194   | -3.815823 | 10.184386 |
| O  | 0.841382   | -3.732946 | 14.909280 |

anatase-like 3-D (2,2,2)-mer

|   |          |          |           |
|---|----------|----------|-----------|
| O | 2.080104 | 2.164046 | 1.819903  |
| O | 2.030656 | 2.092088 | -2.901267 |
| O | 4.166670 | 5.521314 | 1.823808  |
| O | 4.083318 | 5.145099 | -1.564671 |

|    |           |           |           |
|----|-----------|-----------|-----------|
| O  | 5.631001  | 7.413023  | -0.169810 |
| Ti | 5.182533  | 6.665715  | -1.815844 |
| Ti | 5.207291  | 7.155484  | 1.686111  |
| Ti | 3.360013  | 3.690021  | 1.379021  |
| O  | 3.413770  | 2.900170  | -0.357038 |
| Ti | 3.392148  | 3.343254  | -2.168691 |
| O  | 4.929268  | 2.889596  | -3.148642 |
| Ti | 6.415409  | 1.996055  | -2.415479 |
| O  | 6.461082  | 2.056664  | -0.568826 |
| O  | 5.122295  | 2.958257  | 1.934672  |
| Ti | 6.640674  | 1.848971  | 1.343466  |
| O  | 8.472295  | 0.643986  | 1.803261  |
| O  | 8.111039  | 0.834080  | -2.987255 |
| O  | 7.107697  | 6.569584  | 2.186135  |
| O  | 6.752903  | 6.172600  | -2.733964 |
| O  | 7.892756  | 3.390861  | -2.781104 |
| Ti | 8.304744  | 5.211776  | -2.168430 |
| O  | 8.155961  | 5.305957  | -0.321514 |
| O  | 8.056173  | 3.333752  | 1.464221  |
| Ti | 8.523732  | 5.348262  | 1.546589  |
| O  | 10.035420 | 6.576476  | 1.655559  |
| O  | 10.554065 | 3.955490  | 1.743877  |
| O  | 10.212754 | 3.804858  | -1.675805 |
| O  | 9.908833  | 6.224459  | -2.659456 |
| O  | 11.962331 | 6.105582  | -0.218755 |
| Ti | 11.313908 | 5.327273  | -1.784816 |
| O  | 12.929760 | 4.599339  | -2.504606 |
| Ti | 11.623210 | 5.573231  | 1.582605  |
| O  | 13.565615 | 4.871895  | 2.049670  |
| Ti | 14.125517 | 3.104010  | 1.259970  |
| Ti | 13.574885 | 3.151511  | -1.504573 |
| O  | 14.322975 | 1.227263  | 1.551713  |
| Ti | 12.886951 | -0.011245 | 1.342512  |
| O  | 12.431413 | -0.036057 | -0.515670 |
| O  | 13.681250 | 1.578120  | -2.483700 |
| Ti | 12.310801 | 0.212892  | -2.347908 |
| O  | 12.517098 | 3.012942  | 0.095149  |
| O  | 11.352921 | 1.055232  | 1.917036  |
| Ti | 9.780162  | 2.130397  | 1.306742  |
| O  | 15.084051 | 3.441634  | -0.346069 |
| O  | 9.591776  | 1.441868  | -0.454160 |
| O  | 10.946990 | 1.255229  | -3.112264 |
| Ti | 9.491213  | 2.020029  | -2.210120 |
| O  | 0.046643  | -1.193983 | 1.659007  |
| O  | 0.105701  | -1.264457 | -2.792689 |
| Ti | 1.353200  | 0.315368  | 1.303008  |
| O  | 1.488401  | 0.176204  | -0.584152 |
| Ti | 1.397813  | 0.223467  | -2.447689 |
| O  | -4.108495 | -7.920523 | 1.937187  |
| O  | -1.037047 | -7.404998 | -2.814858 |
| O  | -1.077986 | -7.488898 | 1.872709  |
| O  | -2.031369 | -4.602063 | 1.692803  |

|    |           |           |           |
|----|-----------|-----------|-----------|
| Ti | -2.718944 | -6.485248 | 1.436113  |
| O  | -2.572665 | -6.567787 | -0.435077 |
| O  | -2.024189 | -4.650531 | -2.846182 |
| Ti | -2.644599 | -6.457043 | -2.306987 |
| O  | -4.159572 | -7.603708 | -2.793600 |
| O  | 0.871404  | -4.062548 | 1.827728  |
| Ti | -0.719864 | -3.033063 | 1.268695  |
| O  | -0.583018 | -3.251388 | -0.623772 |
| O  | 0.890212  | -3.952084 | -3.280506 |
| Ti | -0.612749 | -3.151025 | -2.486488 |
| O  | 2.904412  | -0.537771 | -3.257900 |
| Ti | 4.413770  | -1.321698 | -2.449564 |
| O  | 4.340684  | -1.385426 | -0.610830 |
| O  | 2.971500  | -0.679546 | 1.824591  |
| Ti | 4.676701  | -1.554963 | 1.285752  |
| O  | 6.561745  | -2.741125 | 1.627935  |
| O  | 6.230921  | -2.388217 | -2.916996 |
| O  | 5.729038  | 0.141316  | -2.705295 |
| O  | 6.012380  | -0.071855 | 1.349618  |
| O  | 12.791058 | -1.914118 | 1.553313  |
| Ti | 11.263740 | -3.010407 | 1.355474  |
| O  | 10.909143 | -2.794152 | -0.539749 |
| O  | 12.095163 | -1.540483 | -2.994598 |
| Ti | 10.681272 | -2.691844 | -2.382605 |
| O  | 11.121893 | -4.910254 | 1.508748  |
| O  | 9.590441  | -2.165512 | 1.896753  |
| Ti | 7.866729  | -1.266478 | 1.349190  |
| O  | 7.782295  | -1.209022 | -0.552208 |
| O  | 9.156555  | -1.819045 | -3.000685 |
| Ti | 7.551590  | -1.014062 | -2.389572 |
| Ti | 2.441354  | -4.433553 | -2.323644 |
| O  | 2.426317  | -4.157511 | -0.501667 |
| Ti | 2.633300  | -4.776673 | 1.306731  |
| Ti | 0.611278  | -7.843350 | -2.054950 |
| O  | 1.868472  | -6.704031 | 1.386749  |
| O  | 2.297679  | -9.391540 | 1.898928  |
| O  | 0.350502  | -8.646904 | -0.369303 |
| Ti | 0.707065  | -8.191178 | 1.444374  |
| O  | 1.693021  | -6.284657 | -1.895196 |
| Ti | 7.274125  | -8.257982 | 1.545140  |
| O  | 7.339093  | -9.219594 | -0.108521 |
| Ti | 6.843742  | -7.813814 | -1.275229 |
| O  | 6.501636  | -6.703303 | 0.332736  |
| O  | 5.380825  | -8.041260 | -2.398177 |
| O  | 5.337849  | -8.979896 | 1.841368  |
| O  | 4.383170  | -6.109092 | 1.661109  |
| Ti | 3.705549  | -8.019077 | 1.353150  |
| O  | 3.521939  | -8.014918 | -0.480878 |
| O  | 4.094563  | -5.695348 | -2.911365 |
| Ti | 3.518678  | -7.495725 | -2.320877 |
| O  | 2.099749  | -8.593944 | -3.025292 |
| O  | 3.800270  | -3.177407 | -3.024000 |

|    |            |           |           |
|----|------------|-----------|-----------|
| O  | 4.140845   | -3.506683 | 1.411683  |
| Ti | 9.458601   | -5.789860 | 1.327759  |
| O  | 9.060620   | -5.250252 | -0.477379 |
| O  | 10.299444  | -4.473059 | -2.982065 |
| Ti | 8.810005   | -5.424470 | -2.314989 |
| O  | 8.338983   | -7.282007 | -2.269542 |
| O  | 9.077155   | -7.664665 | 1.568603  |
| O  | 7.767105   | -5.012303 | 1.910007  |
| Ti | 5.905720   | -4.721816 | 1.164020  |
| O  | 5.681928   | -4.425122 | -0.745860 |
| O  | 7.228336   | -4.899610 | -3.195851 |
| Ti | 5.561383   | -4.262390 | -2.564546 |
| Ti | -9.168374  | 5.565293  | -1.954649 |
| O  | -9.626625  | 5.099398  | -0.170164 |
| O  | -11.712665 | 5.279047  | 1.657422  |
| Ti | -9.894906  | 5.781637  | 1.678722  |
| O  | -9.645693  | 7.620439  | 1.714164  |
| O  | -8.902841  | 7.421512  | -2.056743 |
| O  | -7.467720  | 5.008766  | -2.553084 |
| Ti | -5.818446  | 4.163324  | -2.248432 |
| O  | -5.655841  | 3.792049  | -0.438885 |
| O  | -7.856473  | 5.658633  | 1.984718  |
| Ti | -6.128254  | 4.875408  | 1.241664  |
| O  | -4.281551  | 3.703789  | 1.716346  |
| O  | -4.033514  | 3.212170  | -2.902068 |
| Ti | -7.264070  | 7.897330  | -1.232737 |
| O  | -7.716236  | 9.050059  | 0.158049  |
| Ti | -7.695969  | 7.815146  | 1.664730  |
| O  | -6.812434  | 6.519921  | 0.018749  |
| O  | -6.098909  | 8.659360  | 2.483933  |
| O  | -5.853622  | 8.175189  | -2.438646 |
| O  | -4.424287  | 5.684091  | -2.322812 |
| Ti | -4.145567  | 7.569712  | -1.815592 |
| O  | -4.325095  | 8.368646  | -0.124032 |
| O  | -4.654721  | 6.236419  | 1.380354  |
| Ti | -4.195388  | 8.262698  | 1.770889  |
| O  | -2.811069  | 9.629861  | 1.892734  |
| O  | -2.276123  | 6.993015  | 1.960396  |
| O  | -2.370216  | 6.182494  | -0.750160 |
| O  | -2.538979  | 8.247920  | -2.549233 |
| O  | -0.724322  | 8.654104  | -0.006949 |
| Ti | -1.129072  | 7.559604  | -1.454661 |
| Ti | -1.209196  | 8.617487  | 1.855330  |
| Ti | -2.882432  | 5.126779  | 1.154420  |
| O  | -2.629283  | 3.690819  | -0.243582 |
| Ti | -2.765271  | 4.384462  | -1.937649 |
| O  | -10.387678 | 4.774286  | -3.167744 |
| O  | -1.219134  | 4.248174  | -2.957608 |
| Ti | 0.301080   | 3.219526  | -2.394147 |
| O  | 0.342819   | 3.344085  | -0.559364 |
| O  | -1.164093  | 4.601347  | 1.972050  |
| Ti | 0.260858   | 3.381828  | 1.378448  |

|    |            |           |           |
|----|------------|-----------|-----------|
| O  | 0.707250   | 8.058753  | 2.321283  |
| O  | 0.376008   | 7.060349  | -2.395253 |
| O  | 1.773304   | 4.621049  | -2.775148 |
| Ti | 2.198028   | 6.411858  | -2.049409 |
| O  | 2.034566   | 6.691122  | -0.222185 |
| O  | 1.643527   | 4.867270  | 1.521870  |
| Ti | 2.175087   | 6.901791  | 1.668466  |
| O  | 3.635516   | 8.189917  | 1.746427  |
| O  | 3.674885   | 7.486425  | -2.671025 |
| Ti | -10.994237 | 3.001889  | -2.840354 |
| O  | -11.715343 | 3.503741  | -1.147893 |
| O  | -13.137525 | 2.884674  | 1.562679  |
| Ti | -11.651698 | 3.658954  | 0.696626  |
| O  | -9.449102  | 2.026259  | -3.145267 |
| Ti | -7.866568  | 1.083712  | -2.583332 |
| O  | -8.169399  | 1.264288  | -0.762132 |
| O  | -10.115419 | 2.623077  | 1.393124  |
| Ti | -8.368078  | 1.568793  | 1.144162  |
| O  | -6.483402  | 0.390395  | 1.515931  |
| O  | -6.065307  | -0.038683 | -3.065230 |
| O  | -6.510465  | 2.468139  | -3.034997 |
| O  | -7.039683  | 2.978023  | 1.347234  |
| Ti | -5.138693  | 1.924492  | 1.019518  |
| O  | -4.788070  | 1.198911  | -0.738160 |
| Ti | -4.699944  | 1.303368  | -2.588757 |
| Ti | -13.537347 | -2.514053 | -1.007005 |
| Ti | -13.510955 | -1.899231 | 1.873193  |
| O  | -13.844420 | -1.020475 | -2.097077 |
| Ti | -12.457257 | 0.275778  | -1.985619 |
| O  | -12.341488 | 0.834777  | -0.213313 |
| O  | -14.272461 | -0.109664 | 2.006158  |
| Ti | -12.824757 | 1.038420  | 1.675174  |
| O  | -12.043993 | -2.244373 | 0.150309  |
| O  | -12.377239 | 1.745471  | -3.185190 |
| O  | -11.005860 | -0.790741 | -2.464105 |
| Ti | -9.579637  | -1.968990 | -2.102954 |
| O  | -14.702128 | -2.464671 | 0.437890  |
| O  | -8.977767  | -1.872340 | -0.332373 |
| O  | -11.692947 | -0.691405 | 1.923248  |
| Ti | -10.206402 | -1.906572 | 1.283380  |
| Ti | -11.767419 | -5.107412 | -1.490517 |
| O  | -13.354624 | -4.167468 | -1.924694 |
| O  | -10.850358 | -3.822495 | 1.604464  |
| O  | -10.611345 | -6.399528 | 2.309432  |
| O  | -12.404927 | -5.780200 | 0.189062  |
| Ti | -12.151101 | -5.179423 | 1.958999  |
| O  | -13.435458 | -3.775715 | 2.613237  |
| O  | -10.597770 | -3.630136 | -1.923631 |
| O  | -7.353208  | -6.235279 | -2.673403 |
| O  | -7.527701  | -6.150648 | 1.996859  |
| O  | -8.382835  | -3.184600 | 1.749315  |
| Ti | -9.107006  | -5.096612 | 1.597707  |

|    |            |           |           |
|----|------------|-----------|-----------|
| O  | -8.942146  | -5.293376 | -0.255346 |
| O  | -8.068966  | -3.414397 | -2.706267 |
| Ti | -8.818283  | -5.151247 | -2.147010 |
| O  | -10.528868 | -6.125482 | -2.473099 |
| O  | -8.383175  | -0.809562 | -3.142242 |
| O  | -8.993830  | -0.285599 | 1.489174  |
| O  | -5.591291  | -2.540264 | 1.748319  |
| Ti | -7.191344  | -1.520451 | 1.066328  |
| O  | -6.454509  | -1.749869 | -0.732905 |
| O  | -5.183735  | -2.770569 | -3.404116 |
| Ti | -6.612760  | -1.908182 | -2.568522 |
| O  | -3.162566  | 0.585455  | -3.366463 |
| Ti | -1.674541  | -0.156061 | -2.476324 |
| O  | -1.833628  | -0.119400 | -0.648365 |
| O  | -3.543415  | 0.925970  | 1.739368  |
| Ti | -1.863400  | 0.050888  | 1.285742  |
| O  | -0.404467  | 1.373098  | -2.800534 |
| O  | -0.466286  | 1.475821  | 1.342640  |
| Ti | -3.677755  | -3.350664 | -2.413725 |
| O  | -3.737893  | -3.116513 | -0.588382 |
| Ti | -3.873432  | -3.324864 | 1.305420  |
| Ti | -5.628555  | -6.690390 | -2.007980 |
| O  | -4.596498  | -5.285141 | 1.352527  |
| O  | -5.993128  | -7.338663 | -0.277637 |
| Ti | -5.710840  | -6.800602 | 1.516525  |
| O  | -4.562762  | -5.147841 | -2.126181 |
| O  | -2.313523  | -2.045894 | -3.009857 |
| O  | -2.485450  | -1.901408 | 1.428470  |
| O  | 3.608118   | 1.392470  | 8.228646  |
| O  | 3.769790   | 1.102391  | 3.978796  |
| O  | 5.730295   | 4.734874  | 8.142548  |
| O  | 5.796068   | 4.503832  | 4.314624  |
| O  | 7.323457   | 6.571058  | 6.013658  |
| Ti | 6.953341   | 6.011926  | 4.262836  |
| Ti | 6.816548   | 6.349332  | 7.860435  |
| Ti | 4.882346   | 2.917295  | 7.787734  |
| O  | 5.047116   | 2.619423  | 5.985085  |
| Ti | 5.100163   | 2.560864  | 4.065074  |
| O  | 6.707064   | 1.608216  | 3.548466  |
| Ti | 8.362976   | 0.699499  | 4.085329  |
| O  | 8.183386   | 0.931900  | 5.913034  |
| O  | 6.595668   | 1.998130  | 8.307741  |
| Ti | 8.211713   | 1.002247  | 7.818633  |
| O  | 10.090880  | -0.211529 | 8.241241  |
| O  | 10.177154  | -0.444267 | 4.078703  |
| O  | 8.710328   | 5.682740  | 8.323993  |
| O  | 8.611837   | 5.045876  | 3.706416  |
| O  | 9.692013   | 2.220287  | 3.649309  |
| Ti | 10.290424  | 4.107235  | 4.086903  |
| O  | 10.127742  | 4.191772  | 5.911045  |
| O  | 9.568579   | 2.526846  | 7.925646  |
| Ti | 10.188400  | 4.509429  | 7.793540  |

|    |           |           |          |
|----|-----------|-----------|----------|
| O  | 11.782261 | 5.704891  | 7.653672 |
| O  | 12.182445 | 3.106198  | 8.096375 |
| O  | 12.205712 | 2.904599  | 4.098838 |
| O  | 11.756184 | 5.532640  | 3.701179 |
| O  | 13.876358 | 4.916441  | 5.796316 |
| Ti | 13.369720 | 4.399660  | 4.083959 |
| O  | 14.900607 | 3.132233  | 3.382394 |
| Ti | 13.310465 | 4.651158  | 7.651977 |
| O  | 15.220225 | 3.913896  | 8.184945 |
| Ti | 15.801064 | 2.147173  | 7.463865 |
| Ti | 15.463154 | 1.857140  | 4.691302 |
| O  | 15.917925 | 0.258462  | 7.869320 |
| Ti | 14.398812 | -0.869077 | 7.974422 |
| O  | 14.020780 | -1.397399 | 6.195178 |
| O  | 15.783813 | 0.062170  | 4.223596 |
| Ti | 14.409186 | -1.253186 | 4.383158 |
| O  | 14.303484 | 1.919954  | 6.201542 |
| O  | 12.885080 | 0.214377  | 8.405073 |
| Ti | 11.303824 | 1.314913  | 7.761592 |
| O  | 16.864243 | 2.394701  | 5.897472 |
| O  | 11.486196 | 1.044900  | 5.954407 |
| O  | 13.054401 | -0.190896 | 3.576592 |
| Ti | 11.513948 | 0.986155  | 4.057298 |
| O  | 1.581232  | -2.000982 | 8.159683 |
| O  | 1.713046  | -2.279405 | 3.968122 |
| Ti | 2.889401  | -0.485030 | 7.748251 |
| O  | 3.038230  | -0.694382 | 5.916826 |
| Ti | 3.094878  | -0.838359 | 3.995337 |
| O  | -2.594331 | -8.770620 | 8.242050 |
| O  | 0.595886  | -8.720665 | 3.563771 |
| O  | 0.531018  | -8.307084 | 8.155370 |
| O  | -0.468913 | -5.437990 | 8.149838 |
| Ti | -1.175945 | -7.330227 | 7.786935 |
| O  | -0.976045 | -7.439016 | 5.956140 |
| O  | -0.327681 | -5.713740 | 3.923327 |
| Ti | -0.986991 | -7.658802 | 4.067310 |
| O  | -2.456495 | -8.974440 | 4.055728 |
| O  | 2.549848  | -4.752047 | 8.173047 |
| Ti | 0.828914  | -3.864804 | 7.715269 |
| O  | 0.979413  | -4.162456 | 5.892037 |
| O  | 2.768843  | -4.999847 | 3.513325 |
| Ti | 1.038123  | -4.206311 | 3.986077 |
| O  | 4.778418  | -1.693378 | 3.495336 |
| Ti | 6.409875  | -2.653288 | 4.029520 |
| O  | 6.158683  | -2.461884 | 5.858946 |
| O  | 4.595693  | -1.386856 | 8.256944 |
| Ti | 6.262549  | -2.326682 | 7.767472 |
| O  | 8.147179  | -3.556632 | 8.157962 |
| O  | 8.279615  | -3.706724 | 4.170003 |
| O  | 7.754641  | -1.196477 | 3.636835 |
| O  | 7.702861  | -0.975596 | 7.791874 |
| O  | 14.414660 | -2.724789 | 8.733666 |



|    |            |            |          |
|----|------------|------------|----------|
| Ti | 12.936742  | -4.094843  | 8.272910 |
| O  | 13.157421  | -4.231149  | 6.390996 |
| O  | 14.425513  | -3.073538  | 3.906044 |
| Ti | 12.960864  | -4.151293  | 4.494081 |
| O  | 12.462841  | -6.048405  | 8.751792 |
| O  | 11.290301  | -3.174753  | 8.454886 |
| Ti | 9.558034   | -2.151309  | 7.834764 |
| O  | 9.930898   | -2.381055  | 6.033563 |
| O  | 11.450300  | -3.273566  | 3.713473 |
| Ti | 9.698547   | -2.379510  | 4.116838 |
| Ti | 4.435676   | -5.950950  | 3.943278 |
| O  | 4.333564   | -5.861443  | 5.776321 |
| Ti | 4.195479   | -5.662635  | 7.689919 |
| Ti | 2.467819   | -9.413907  | 4.033793 |
| O  | 3.475807   | -7.622647  | 7.566926 |
| O  | 3.955246   | -10.207988 | 8.119444 |
| O  | 1.991183   | -9.655824  | 5.872883 |
| Ti | 2.276839   | -9.094801  | 7.656468 |
| O  | 3.633687   | -7.819110  | 3.762419 |
| Ti | 8.944099   | -9.512191  | 7.546746 |
| O  | 9.152693   | -10.630420 | 6.000589 |
| Ti | 8.956501   | -9.193427  | 4.746192 |
| O  | 8.501537   | -8.088256  | 6.202585 |
| O  | 7.548649   | -9.364511  | 3.450906 |
| O  | 7.048786   | -9.715402  | 8.132031 |
| O  | 6.043840   | -6.924435  | 8.138970 |
| Ti | 5.332111   | -8.773462  | 7.659265 |
| O  | 5.611831   | -8.933350  | 5.804357 |
| O  | 6.352384   | -7.136950  | 3.487225 |
| Ti | 5.489251   | -9.106152  | 3.938028 |
| O  | 4.083024   | -10.438039 | 3.978253 |
| O  | 5.772184   | -4.534925  | 3.524425 |
| O  | 5.574578   | -4.264846  | 7.829792 |
| Ti | 10.844778  | -6.883133  | 7.965678 |
| O  | 11.084688  | -6.284483  | 6.182759 |
| O  | 12.754510  | -5.952035  | 3.907214 |
| Ti | 11.133071  | -6.795086  | 4.387587 |
| O  | 10.686787  | -8.637340  | 4.213781 |
| O  | 10.697236  | -8.762596  | 7.871557 |
| O  | 9.133622   | -6.119568  | 8.377242 |
| Ti | 7.372817   | -5.405832  | 7.716784 |
| O  | 7.424896   | -5.626272  | 5.862915 |
| O  | 9.556975   | -6.105739  | 3.586346 |
| Ti | 7.644692   | -5.634769  | 3.988170 |
| Ti | -7.750774  | 5.367798   | 4.226820 |
| O  | -8.265406  | 4.572802   | 5.922575 |
| O  | -10.188289 | 4.422551   | 8.058599 |
| Ti | -8.393281  | 5.021845   | 7.755451 |
| O  | -8.110007  | 6.911830   | 7.815073 |
| O  | -7.826578  | 7.374063   | 3.840985 |
| O  | -6.158672  | 4.612730   | 3.430789 |
| Ti | -4.432505  | 3.716674   | 3.921808 |

|    |            |           |          |
|----|------------|-----------|----------|
| O  | -4.532207  | 3.796023  | 5.792513 |
| O  | -6.336176  | 4.996196  | 8.068167 |
| Ti | -4.673204  | 3.968130  | 7.654932 |
| O  | -2.862007  | 2.817896  | 8.187722 |
| O  | -2.635445  | 2.582775  | 3.891810 |
| Ti | -6.057995  | 7.968078  | 4.539512 |
| O  | -6.204502  | 8.778111  | 6.211645 |
| Ti | -6.266908  | 7.167725  | 7.351556 |
| O  | -6.147095  | 6.246571  | 5.547316 |
| O  | -4.796739  | 7.621264  | 8.576649 |
| O  | -4.221784  | 7.893088  | 3.903487 |
| O  | -3.099240  | 5.239776  | 3.671683 |
| Ti | -2.447210  | 7.046444  | 4.311775 |
| O  | -2.887791  | 7.315804  | 6.116493 |
| O  | -3.357411  | 5.439340  | 7.940916 |
| Ti | -2.763271  | 7.438736  | 7.992619 |
| O  | -1.357068  | 8.790882  | 8.021804 |
| O  | -0.805666  | 6.198630  | 8.192075 |
| O  | -0.609288  | 5.965450  | 4.498500 |
| O  | -1.117752  | 8.554809  | 3.955043 |
| O  | 0.847085   | 8.057552  | 6.167540 |
| Ti | 0.567037   | 7.465611  | 4.406703 |
| Ti | 0.285799   | 7.821767  | 7.994869 |
| Ti | -1.554446  | 4.329410  | 7.792549 |
| O  | -1.321326  | 4.015461  | 6.004552 |
| Ti | -1.306306  | 4.025745  | 4.076114 |
| O  | -9.521371  | 4.568239  | 3.408192 |
| O  | 0.287225   | 3.066123  | 3.544832 |
| Ti | 1.971267   | 2.200485  | 4.128973 |
| O  | 1.782904   | 2.465565  | 5.956472 |
| O  | 0.167742   | 3.579849  | 8.409876 |
| Ti | 1.772561   | 2.590834  | 7.867164 |
| O  | 2.191980   | 7.198311  | 8.486269 |
| O  | 2.202413   | 6.541637  | 3.805238 |
| O  | 3.253674   | 3.767173  | 3.703408 |
| Ti | 3.925088   | 5.632433  | 4.218001 |
| O  | 3.659056   | 5.791823  | 6.038011 |
| O  | 3.113702   | 4.098045  | 8.000198 |
| Ti | 3.736609   | 6.091318  | 7.921585 |
| O  | 5.233548   | 7.366214  | 7.914202 |
| O  | 5.286701   | 7.104806  | 3.819091 |
| Ti | -9.996988  | 2.640373  | 3.578050 |
| O  | -10.576442 | 2.852181  | 5.370978 |
| O  | -11.723370 | 1.771252  | 8.006084 |
| Ti | -10.343985 | 2.764910  | 7.201028 |
| O  | -8.408620  | 1.601232  | 3.407236 |
| Ti | -6.662344  | 0.501260  | 3.786398 |
| O  | -7.000451  | 0.714133  | 5.630919 |
| O  | -8.723884  | 1.758516  | 7.761669 |
| Ti | -6.931182  | 0.766507  | 7.509746 |
| O  | -5.040327  | -0.404548 | 8.127271 |
| O  | -4.839545  | -0.678971 | 3.901905 |

|    |            |           |          |
|----|------------|-----------|----------|
| O  | -5.284542  | 1.917345  | 3.467030 |
| O  | -5.512988  | 2.125298  | 7.712098 |
| Ti | -3.635131  | 0.985458  | 7.687314 |
| O  | -3.472698  | 0.777235  | 5.862517 |
| Ti | -3.425773  | 0.701571  | 3.925392 |
| Ti | -12.778451 | -3.628573 | 4.711473 |
| Ti | -12.293696 | -3.024631 | 7.450034 |
| O  | -12.986120 | -1.729198 | 4.002613 |
| Ti | -11.354918 | -0.591146 | 4.128420 |
| O  | -10.927217 | -0.088566 | 5.887883 |
| O  | -12.889877 | -1.229947 | 7.828298 |
| Ti | -11.382253 | -0.082067 | 7.755112 |
| O  | -11.253815 | -3.212518 | 5.763923 |
| O  | -11.529410 | 1.285897  | 3.367919 |
| O  | -10.048871 | -1.865948 | 3.490747 |
| Ti | -8.418057  | -2.946616 | 3.980048 |
| O  | -13.762676 | -3.661687 | 6.288681 |
| O  | -8.339264  | -2.604266 | 5.794455 |
| O  | -10.406450 | -1.891396 | 8.079487 |
| Ti | -8.642487  | -2.715642 | 7.639968 |
| Ti | -10.427520 | -6.315346 | 4.432831 |
| O  | -12.298537 | -5.472970 | 4.048373 |
| O  | -9.377909  | -4.613398 | 7.698551 |
| O  | -9.100881  | -7.163134 | 8.441929 |
| O  | -11.094143 | -6.573454 | 6.267425 |
| Ti | -10.665698 | -6.001301 | 7.969396 |
| O  | -12.010881 | -4.572477 | 8.617854 |
| O  | -9.280336  | -4.785211 | 3.921872 |
| O  | -5.891369  | -7.303445 | 3.627798 |
| O  | -5.976328  | -6.894371 | 8.293941 |
| O  | -6.864543  | -3.912934 | 8.146076 |
| Ti | -7.583890  | -5.835270 | 7.882803 |
| O  | -7.238752  | -5.916650 | 6.071201 |
| O  | -6.687748  | -4.204279 | 3.934252 |
| Ti | -7.362987  | -6.124791 | 4.197866 |
| O  | -8.930567  | -7.380980 | 4.426140 |
| O  | -7.240461  | -1.415804 | 3.404102 |
| O  | -7.444570  | -1.147190 | 7.795467 |
| O  | -3.927124  | -3.205885 | 8.249864 |
| Ti | -5.595316  | -2.323886 | 7.685450 |
| O  | -5.362907  | -2.499609 | 5.865470 |
| O  | -3.731233  | -3.529409 | 3.472818 |
| Ti | -5.388114  | -2.621391 | 3.941272 |
| O  | -1.747145  | -0.196023 | 3.467511 |
| Ti | -0.095663  | -1.130273 | 4.054167 |
| O  | -0.301831  | -0.942511 | 5.886093 |
| O  | -1.996430  | 0.064871  | 8.279692 |
| Ti | -0.291620  | -0.800410 | 7.806332 |
| O  | 1.213753   | 0.359570  | 3.639260 |
| O  | 1.062201   | 0.654935  | 7.874029 |
| Ti | -2.080731  | -4.498310 | 4.055065 |
| O  | -2.326810  | -4.318438 | 5.870349 |

|    |           |           |           |
|----|-----------|-----------|-----------|
| Ti | -2.303647 | -4.202479 | 7.777926  |
| Ti | -4.012535 | -7.939403 | 4.115361  |
| O  | -3.054965 | -6.144090 | 7.733295  |
| O  | -4.498495 | -8.157451 | 5.968898  |
| Ti | -4.206774 | -7.645458 | 7.755996  |
| O  | -2.948191 | -6.318813 | 3.757151  |
| O  | -0.815281 | -2.998971 | 3.605149  |
| O  | -0.961546 | -2.755805 | 7.831861  |
| O  | 5.155166  | 0.558030  | 14.634037 |
| O  | 5.301290  | 0.315055  | 10.407372 |
| O  | 7.287963  | 3.878086  | 14.482175 |
| O  | 7.394734  | 3.703536  | 10.506092 |
| O  | 8.838225  | 5.716761  | 12.270512 |
| Ti | 8.546667  | 5.205019  | 10.483372 |
| Ti | 8.352129  | 5.498729  | 14.124012 |
| Ti | 6.420647  | 2.057383  | 14.184166 |
| O  | 6.666374  | 1.877345  | 12.368876 |
| Ti | 6.643398  | 1.761952  | 10.461298 |
| O  | 8.267021  | 0.765433  | 9.989423  |
| Ti | 9.935021  | -0.116884 | 10.553735 |
| O  | 9.703229  | 0.058413  | 12.373830 |
| O  | 8.071437  | 1.088861  | 14.766191 |
| Ti | 9.727984  | 0.180247  | 14.298111 |
| O  | 11.580623 | -1.024757 | 14.835593 |
| O  | 11.784404 | -1.293439 | 10.444227 |
| O  | 10.230995 | 4.862778  | 14.611563 |
| O  | 10.316288 | 4.454005  | 9.945335  |
| O  | 11.204415 | 1.472140  | 10.093165 |
| Ti | 11.923569 | 3.394611  | 10.356586 |
| O  | 11.578006 | 3.475506  | 12.168114 |
| O  | 11.027485 | 1.763578  | 14.305329 |
| Ti | 11.702584 | 3.684290  | 14.041388 |
| O  | 13.270086 | 4.940638  | 13.812631 |
| O  | 13.620068 | 2.344897  | 14.318098 |
| O  | 13.717644 | 2.173034  | 10.540656 |
| O  | 13.440235 | 4.722912  | 9.797406  |
| O  | 15.433454 | 4.133180  | 11.971990 |
| Ti | 15.005373 | 3.561288  | 10.270063 |
| O  | 16.350639 | 2.132834  | 9.621676  |
| Ti | 14.766986 | 3.875256  | 13.806659 |
| O  | 16.638344 | 3.033975  | 14.191442 |
| Ti | 17.118839 | 1.189661  | 13.528399 |
| Ti | 16.633756 | 0.585414  | 10.789880 |
| O  | 17.327288 | -0.709939 | 14.237618 |
| Ti | 15.696265 | -1.847659 | 14.112071 |
| O  | 15.268432 | -2.350032 | 12.352527 |
| O  | 17.230570 | -1.209099 | 10.411663 |
| Ti | 15.722937 | -2.356848 | 10.485298 |
| O  | 15.594301 | 0.773121  | 12.476658 |
| O  | 14.389159 | -0.573455 | 14.749709 |
| Ti | 12.757644 | 0.506075  | 14.259683 |
| O  | 18.102905 | 1.223251  | 11.951569 |

|    |           |            |           |
|----|-----------|------------|-----------|
| O  | 12.680037 | 0.164104   | 12.445258 |
| O  | 14.746953 | -0.547852  | 10.160159 |
| Ti | 12.982094 | 0.275128   | 10.599453 |
| O  | 3.125951  | -2.800227  | 14.599833 |
| O  | 3.277678  | -3.095595  | 10.365396 |
| Ti | 4.435492  | -1.310587  | 14.185151 |
| O  | 4.641731  | -1.498253  | 12.353216 |
| Ti | 4.631532  | -1.640195  | 10.432998 |
| O  | -0.946401 | -9.545681  | 14.420170 |
| O  | 2.148459  | -9.638698  | 9.753120  |
| O  | 2.138217  | -8.982177  | 14.433897 |
| O  | 1.086082  | -6.207843  | 14.535652 |
| Ti | 0.415262  | -8.073220  | 14.021236 |
| O  | 0.681032  | -8.232991  | 12.201198 |
| O  | 1.226160  | -6.538751  | 10.239100 |
| Ti | 0.603400  | -8.532047  | 10.317588 |
| O  | -0.893507 | -9.806871  | 10.324903 |
| O  | 4.052841  | -5.506477  | 14.694291 |
| Ti | 2.368429  | -4.641180  | 14.110257 |
| O  | 2.556730  | -4.906565  | 12.282789 |
| O  | 4.172242  | -6.020336  | 9.829277  |
| Ti | 2.567309  | -5.031533  | 10.372099 |
| O  | 6.336289  | -2.505485  | 9.959740  |
| Ti | 7.975083  | -3.426081  | 10.552107 |
| O  | 7.812839  | -3.217945  | 12.376962 |
| O  | 6.087027  | -2.244970  | 14.771966 |
| Ti | 7.765625  | -3.142487  | 14.314089 |
| O  | 9.624537  | -4.358087  | 14.772311 |
| O  | 9.853129  | -4.565894  | 10.526983 |
| O  | 9.380137  | -2.036237  | 10.112043 |
| O  | 9.179427  | -1.761838  | 14.338001 |
| O  | 15.870564 | -3.724953  | 14.872514 |
| Ti | 14.338596 | -5.078875  | 14.661463 |
| O  | 14.917179 | -5.290329  | 12.868387 |
| O  | 16.063691 | -4.210167  | 10.233985 |
| Ti | 14.684208 | -5.204797  | 11.038477 |
| O  | 13.862583 | -7.007140  | 14.829488 |
| O  | 12.749356 | -4.040576  | 14.832206 |
| Ti | 11.002389 | -2.942114  | 14.453446 |
| O  | 11.339764 | -3.154834  | 12.608670 |
| O  | 13.064206 | -4.198088  | 10.477980 |
| Ti | 11.271013 | -3.207220  | 10.729909 |
| Ti | 5.894431  | -6.769803  | 10.446521 |
| O  | 5.660940  | -6.455871  | 12.234377 |
| Ti | 5.646004  | -6.466561  | 14.162700 |
| Ti | 4.054668  | -10.262563 | 10.244297 |
| O  | 4.949357  | -8.406246  | 13.740439 |
| O  | 5.458363  | -10.995398 | 14.284252 |
| O  | 3.493504  | -10.498790 | 12.071634 |
| Ti | 3.773358  | -9.906532  | 13.832464 |
| O  | 5.145896  | -8.639310  | 10.047123 |
| Ti | 10.399368 | -10.406514 | 13.699499 |

|    |           |            |           |
|----|-----------|------------|-----------|
| O  | 10.545534 | -11.217435 | 12.027229 |
| Ti | 10.608164 | -9.607276  | 10.887010 |
| O  | 10.488271 | -8.685645  | 12.691034 |
| O  | 9.137583  | -10.060762 | 9.662589  |
| O  | 8.562936  | -10.332220 | 14.335656 |
| O  | 7.438769  | -7.680317  | 14.567214 |
| Ti | 6.787711  | -9.487159  | 13.927210 |
| O  | 7.227695  | -9.756727  | 12.122401 |
| O  | 7.697052  | -7.879762  | 10.298089 |
| Ti | 7.103860  | -9.879296  | 10.246149 |
| O  | 5.697678  | -11.231469 | 10.216927 |
| O  | 7.201804  | -5.258494  | 10.051300 |
| O  | 6.975039  | -5.024076  | 14.347217 |
| Ti | 12.092162 | -7.807254  | 14.012070 |
| O  | 12.605546 | -7.011934  | 12.316079 |
| O  | 14.529216 | -6.861596  | 10.180686 |
| Ti | 12.734574 | -7.461060  | 10.483241 |
| O  | 12.450966 | -9.351328  | 10.423374 |
| O  | 12.167724 | -9.812757  | 14.397872 |
| O  | 10.498564 | -7.053884  | 14.807807 |
| Ti | 8.772234  | -6.157218  | 14.317087 |
| O  | 8.871497  | -6.236782  | 12.446433 |
| O  | 10.677131 | -7.435438  | 10.170892 |
| Ti | 9.013232  | -6.408740  | 10.584022 |
| Ti | -6.503885 | 4.444189   | 10.273646 |
| O  | -6.744153 | 3.845021   | 12.056422 |
| O  | -8.414014 | 3.512776   | 14.332168 |
| Ti | -6.792695 | 4.355862   | 13.851524 |
| O  | -6.346124 | 6.197943   | 14.025298 |
| O  | -6.356722 | 6.323665   | 10.367658 |
| O  | -4.793610 | 3.679075   | 9.861468  |
| Ti | -3.032940 | 2.965096   | 10.522310 |
| O  | -3.085433 | 3.185787   | 12.376254 |
| O  | -5.216901 | 3.666063   | 14.653168 |
| Ti | -3.305016 | 3.194613   | 14.250969 |
| O  | -1.432779 | 2.094331   | 14.714856 |
| O  | -1.234871 | 1.824099   | 10.409522 |
| Ti | -4.603135 | 7.073300   | 10.692341 |
| O  | -4.811266 | 8.191011   | 12.239015 |
| Ti | -4.615596 | 6.753446   | 13.492716 |
| O  | -4.161704 | 5.648316   | 12.035951 |
| O  | -3.208095 | 6.924340   | 14.788417 |
| O  | -2.708086 | 7.275547   | 10.106930 |
| O  | -1.704298 | 4.483810   | 10.100205 |
| Ti | -0.991774 | 6.332807   | 10.579860 |
| O  | -1.272195 | 6.492670   | 12.434731 |
| O  | -2.013153 | 4.696346   | 14.751822 |
| Ti | -1.148972 | 6.665640   | 14.300991 |
| O  | 0.257202  | 7.997593   | 14.260731 |
| O  | 0.706284  | 5.378549   | 14.476643 |
| O  | 0.864129  | 5.182027   | 10.672341 |
| O  | 0.385108  | 7.767396   | 10.119803 |

|    |            |           |           |
|----|------------|-----------|-----------|
| O  | 2.349028   | 7.214886  | 12.366391 |
| Ti | 2.063252   | 6.654211  | 10.582842 |
| Ti | 1.872265   | 6.973224  | 14.205619 |
| Ti | -0.095159  | 3.511411  | 14.295955 |
| O  | 0.005396   | 3.420723  | 12.462894 |
| Ti | 0.144350   | 3.222205  | 10.549278 |
| O  | -8.121737  | 3.609169  | 9.487169  |
| O  | 1.790045   | 2.311617  | 10.066252 |
| Ti | 3.510758   | 1.424115  | 10.524077 |
| O  | 3.360226   | 1.721565  | 12.347249 |
| O  | 1.571107   | 2.559421  | 14.725882 |
| Ti | 3.301700   | 1.765569  | 14.253210 |
| O  | 3.744445   | 6.280458  | 14.675690 |
| O  | 3.809136   | 5.866539  | 10.083830 |
| O  | 4.808603   | 2.997278  | 10.089350 |
| Ti | 5.515886   | 4.889551  | 10.452444 |
| O  | 5.315606   | 4.998009  | 12.283219 |
| O  | 4.667485   | 3.272870  | 14.316013 |
| Ti | 5.326630   | 5.217965  | 14.172016 |
| O  | 6.796364   | 6.533769  | 14.183656 |
| O  | 6.934136   | 6.329989  | 9.997311  |
| Ti | -8.595998  | 1.655906  | 9.966563  |
| O  | -8.817173  | 1.792598  | 11.848305 |
| O  | -10.084919 | 0.634179  | 14.333305 |
| Ti | -8.620401  | 1.711871  | 13.745114 |
| O  | -6.950263  | 0.734850  | 9.784548  |
| Ti | -5.218270  | -0.289549 | 10.404490 |
| O  | -5.591670  | -0.059004 | 12.205590 |
| O  | -7.110152  | 0.833873  | 14.525890 |
| Ti | -5.358922  | -0.061135 | 14.122290 |
| O  | -3.414765  | -1.243770 | 14.602345 |
| O  | -3.363144  | -1.464980 | 10.447718 |
| O  | -3.807388  | 1.115934  | 10.081327 |
| O  | -3.939950  | 1.266535  | 14.069171 |
| Ti | -2.070323  | 0.210226  | 14.209738 |
| O  | -1.819315  | 0.023138  | 12.380302 |
| Ti | -1.922766  | -0.113988 | 10.471836 |
| Ti | -11.460796 | -4.586594 | 10.775519 |
| Ti | -11.122785 | -4.296919 | 13.548145 |
| O  | -11.577176 | -2.697775 | 10.370184 |
| Ti | -10.057764 | -1.570399 | 10.265058 |
| O  | -9.679115  | -1.041846 | 12.044179 |
| O  | -11.443074 | -2.501661 | 14.015510 |
| Ti | -10.068369 | -1.186201 | 13.856023 |
| O  | -9.963104  | -4.360170 | 12.037934 |
| O  | -10.074197 | 0.285423  | 9.506134  |
| O  | -8.545071  | -2.655042 | 9.834155  |
| Ti | -6.963815  | -3.755839 | 10.477826 |
| O  | -12.524164 | -4.833851 | 12.341589 |
| O  | -7.146820  | -3.485466 | 12.284841 |
| O  | -8.714110  | -2.248888 | 14.662911 |
| Ti | -7.174338  | -3.426601 | 14.181971 |

|    |            |           |           |
|----|------------|-----------|-----------|
| Ti | -8.971039  | -7.091490 | 10.587341 |
| O  | -10.880543 | -6.353605 | 10.054545 |
| O  | -7.865995  | -5.345164 | 14.140572 |
| O  | -7.416390  | -7.973205 | 14.538003 |
| O  | -9.536836  | -7.356997 | 12.442991 |
| Ti | -9.029829  | -6.840152 | 14.155259 |
| O  | -10.560745 | -5.572426 | 14.856977 |
| O  | -7.842217  | -5.546716 | 10.142954 |
| O  | -4.370358  | -8.123103 | 9.915414  |
| O  | -4.271542  | -7.486274 | 14.532676 |
| O  | -5.352479  | -4.660898 | 14.589927 |
| Ti | -5.950386  | -6.547873 | 14.152426 |
| O  | -5.788421  | -6.632739 | 12.328258 |
| O  | -5.228694  | -4.967676 | 10.313628 |
| Ti | -5.848867  | -6.950223 | 10.445692 |
| O  | -7.442769  | -8.145376 | 10.585194 |
| O  | -5.751060  | -2.229227 | 9.998123  |
| O  | -5.837406  | -1.996279 | 14.160213 |
| O  | -2.367287  | -4.048647 | 14.690708 |
| Ti | -4.023275  | -3.140268 | 14.153949 |
| O  | -3.843763  | -3.372868 | 12.326189 |
| O  | -2.255721  | -4.438438 | 9.931433  |
| Ti | -3.871880  | -3.442942 | 10.420609 |
| O  | -0.255938  | -1.053895 | 9.982437  |
| Ti | 1.450313   | -1.955735 | 10.491031 |
| O  | 1.301497   | -1.746212 | 12.322441 |
| O  | -0.438698  | -0.747141 | 14.743868 |
| Ti | 1.244854   | -1.602229 | 14.243882 |
| O  | 2.758528   | -0.439677 | 10.079554 |
| O  | 2.626796   | -0.161327 | 14.271187 |
| Ti | -0.542530  | -5.357788 | 10.451622 |
| O  | -0.707543  | -5.060146 | 12.254167 |
| Ti | -0.760399  | -5.001485 | 14.174163 |
| Ti | -2.476608  | -8.789822 | 10.378936 |
| O  | -1.456026  | -6.944697 | 13.924490 |
| O  | -2.983451  | -9.012120 | 12.225635 |
| Ti | -2.613091  | -8.451011 | 13.976481 |
| O  | -1.390993  | -7.175693 | 10.096808 |
| O  | 0.731769   | -3.833229 | 10.010676 |
| O  | 0.569968   | -3.542969 | 14.260466 |
| O  | 6.653404   | -0.394651 | 21.248897 |
| O  | 6.825161   | -0.539706 | 16.810623 |
| O  | 8.903412   | 2.708379  | 20.365964 |
| O  | 8.936084   | 2.844285  | 16.886934 |
| O  | 10.333225  | 4.898476  | 18.516788 |
| Ti | 10.050259  | 4.360027  | 16.722629 |
| Ti | 9.968722   | 4.249655  | 20.248741 |
| Ti | 8.017994   | 0.910371  | 20.653005 |
| O  | 8.077726   | 0.676152  | 18.827680 |
| Ti | 8.213111   | 0.883874  | 16.933866 |
| O  | 9.931222   | 0.099651  | 16.491344 |
| Ti | 11.531307  | -0.919818 | 17.173612 |



|    |           |            |           |
|----|-----------|------------|-----------|
| O  | 10.794369 | -0.690770  | 18.972797 |
| O  | 9.523906  | 0.330416   | 21.643528 |
| Ti | 10.952861 | -0.532037  | 20.808529 |
| O  | 12.723622 | -1.630762  | 21.381504 |
| O  | 13.334175 | -2.154245  | 16.751261 |
| O  | 11.693297 | 3.795328   | 20.913243 |
| O  | 11.867504 | 3.710817   | 16.242279 |
| O  | 12.722325 | 0.744573   | 16.490656 |
| Ti | 13.446524 | 2.656542   | 16.641637 |
| O  | 13.281499 | 2.854331   | 18.494602 |
| O  | 12.408990 | 0.974287   | 20.946199 |
| Ti | 13.158056 | 2.711420   | 20.386474 |
| O  | 14.868587 | 3.686223   | 20.713469 |
| O  | 14.937011 | 1.191559   | 20.161368 |
| O  | 15.190370 | 1.383342   | 16.635460 |
| O  | 14.950651 | 3.960357   | 15.929940 |
| O  | 16.744245 | 3.342000   | 18.050412 |
| Ti | 16.490473 | 2.740768   | 16.280727 |
| O  | 17.774898 | 1.336992   | 15.626799 |
| Ti | 16.106933 | 2.669083   | 19.729847 |
| O  | 17.693721 | 1.729611   | 20.165590 |
| Ti | 17.876904 | 0.076166   | 19.247568 |
| Ti | 17.851213 | -0.539391  | 16.367415 |
| O  | 18.185251 | -1.417148  | 20.337931 |
| Ti | 16.798714 | -2.713428  | 20.226373 |
| O  | 16.684237 | -3.271616  | 18.453904 |
| O  | 18.613350 | -2.328390  | 16.234074 |
| Ti | 17.166152 | -3.477805  | 16.565720 |
| O  | 16.384167 | -0.194547  | 18.089603 |
| O  | 15.347294 | -1.646835  | 20.704098 |
| Ti | 13.919336 | -0.470393  | 20.342558 |
| O  | 19.041851 | 0.026996   | 17.802886 |
| O  | 13.317575 | -0.567332  | 18.572037 |
| O  | 16.033471 | -1.747931  | 16.316895 |
| Ti | 14.546435 | -0.532936  | 16.956423 |
| O  | 4.744766  | -3.813975  | 21.039736 |
| O  | 4.806275  | -3.916642  | 16.896615 |
| Ti | 6.014509  | -2.284754  | 20.715668 |
| O  | 6.173183  | -2.321009  | 18.887672 |
| Ti | 6.203403  | -2.492130  | 16.953591 |
| O  | 0.665875  | -9.927053  | 20.909965 |
| O  | 3.633734  | -10.499078 | 15.918144 |
| O  | 3.964975  | -9.501364  | 20.634196 |
| O  | 2.566855  | -7.062160  | 21.013684 |
| Ti | 2.143258  | -8.852889  | 20.288339 |
| O  | 2.306522  | -9.132429  | 18.461234 |
| O  | 2.696840  | -7.307649  | 16.717361 |
| Ti | 2.165405  | -9.342315  | 16.570638 |
| O  | 0.705113  | -10.630261 | 16.492624 |
| O  | 5.559339  | -6.688936  | 21.196523 |
| Ti | 4.039060  | -5.660259  | 20.633228 |
| O  | 3.997330  | -5.785190  | 18.798487 |

|    |           |            |           |
|----|-----------|------------|-----------|
| O  | 5.503760  | -7.042434  | 16.266822 |
| Ti | 4.079030  | -5.822608  | 16.860547 |
| O  | 7.883357  | -3.367152  | 16.500109 |
| Ti | 9.479019  | -4.364567  | 17.220163 |
| O  | 9.127966  | -3.637403  | 18.977597 |
| O  | 7.502655  | -3.025471  | 21.606127 |
| Ti | 9.040107  | -3.743030  | 20.828048 |
| O  | 10.850541 | -4.907980  | 21.273366 |
| O  | 11.380371 | -5.418204  | 16.890807 |
| O  | 10.823277 | -2.830496  | 16.723824 |
| O  | 10.405653 | -2.402201  | 21.305994 |
| O  | 16.718412 | -4.183260  | 21.426164 |
| Ti | 15.336035 | -5.439350  | 21.079441 |
| O  | 16.056570 | -5.940325  | 19.387973 |
| O  | 17.477791 | -5.322869  | 16.679004 |
| Ti | 15.991395 | -6.100429  | 17.542376 |
| O  | 14.728818 | -7.212907  | 21.406949 |
| O  | 13.790168 | -4.464556  | 21.384829 |
| Ti | 12.207045 | -3.523496  | 20.822921 |
| O  | 12.509764 | -3.704105  | 19.001723 |
| O  | 14.455533 | -5.063345  | 16.846232 |
| Ti | 12.708507 | -4.008673  | 17.095298 |
| Ti | 7.222538  | -7.566612  | 17.084183 |
| O  | 6.968516  | -6.130561  | 18.482128 |
| Ti | 7.104927  | -6.824615  | 20.175843 |
| Ti | 5.550027  | -11.057741 | 16.383969 |
| O  | 6.710311  | -8.622882  | 18.989866 |
| O  | 6.880136  | -10.687793 | 20.788321 |
| O  | 5.065523  | -11.095488 | 18.246295 |
| Ti | 5.470236  | -10.000454 | 19.693683 |
| O  | 6.616668  | -9.433157  | 16.278727 |
| Ti | 11.606012 | -10.334037 | 19.472281 |
| O  | 12.057720 | -11.487431 | 18.081862 |
| Ti | 12.037128 | -10.253644 | 16.574353 |
| O  | 11.153260 | -8.958009  | 18.219884 |
| O  | 10.440171 | -11.097670 | 15.755020 |
| O  | 10.195378 | -10.612918 | 20.677647 |
| O  | 8.765056  | -8.123528  | 20.559534 |
| Ti | 8.486318  | -10.009612 | 20.053916 |
| O  | 8.665997  | -10.809536 | 18.363171 |
| O  | 8.995046  | -8.676141  | 16.858935 |
| Ti | 8.536222  | -10.702349 | 16.468312 |
| O  | 7.152439  | -12.069689 | 16.345938 |
| O  | 8.621439  | -6.143963  | 16.521877 |
| O  | 8.373521  | -5.651756  | 21.139948 |
| Ti | 13.511238 | -8.002389  | 20.191630 |
| O  | 13.971274 | -7.538148  | 18.407490 |
| O  | 16.054212 | -7.718054  | 16.579535 |
| Ti | 14.237765 | -8.220364  | 16.557906 |
| O  | 13.987015 | -10.060412 | 16.523567 |
| O  | 13.245437 | -9.858417  | 20.295120 |
| O  | 11.809115 | -7.446084  | 20.786531 |

|    |           |           |           |
|----|-----------|-----------|-----------|
| Ti | 10.158106 | -6.602732 | 20.484810 |
| O  | 9.993785  | -6.228622 | 18.675582 |
| O  | 12.198297 | -8.096787 | 16.254947 |
| Ti | 10.468643 | -7.314949 | 16.995944 |
| Ti | -5.118352 | 3.350054  | 16.911824 |
| O  | -4.719756 | 2.810108  | 18.716915 |
| O  | -5.958649 | 2.032997  | 21.221809 |
| Ti | -4.469995 | 2.984481  | 20.554520 |
| O  | -3.998274 | 4.841962  | 20.508850 |
| O  | -4.736800 | 5.224795  | 16.670954 |
| O  | -3.427395 | 2.571683  | 16.329094 |
| Ti | -1.565860 | 2.281196  | 17.075137 |
| O  | -1.342162 | 1.984367  | 18.984995 |
| O  | -2.887903 | 2.459359  | 21.435680 |
| Ti | -1.221538 | 1.821672  | 20.803708 |
| O  | 0.539769  | 0.736695  | 21.263224 |
| O  | 0.198890  | 1.065715  | 16.827527 |
| Ti | -2.933298 | 5.818201  | 16.694154 |
| O  | -2.998113 | 6.779488  | 18.348354 |
| Ti | -2.503312 | 5.373557  | 19.514345 |
| O  | -2.161546 | 4.262894  | 17.906513 |
| O  | -1.040193 | 5.600933  | 20.637792 |
| O  | -0.997401 | 6.539616  | 16.397723 |
| O  | -0.043540 | 3.668336  | 16.578038 |
| Ti | 0.634585  | 5.578344  | 16.885130 |
| O  | 0.818322  | 5.574140  | 18.722262 |
| O  | 0.245377  | 3.254603  | 21.150575 |
| Ti | 0.821466  | 5.054926  | 20.559984 |
| O  | 2.241601  | 6.153316  | 21.264346 |
| O  | 2.647273  | 3.844022  | 20.134917 |
| O  | 2.471414  | 4.263382  | 16.852267 |
| O  | 2.042481  | 6.950994  | 16.340370 |
| O  | 3.989667  | 6.206204  | 18.609248 |
| Ti | 3.632598  | 5.750550  | 16.794611 |
| Ti | 3.728960  | 5.403011  | 20.295274 |
| Ti | 1.898635  | 1.992805  | 20.563114 |
| O  | 1.913347  | 1.717498  | 18.741031 |
| Ti | 1.706606  | 2.336071  | 16.932445 |
| O  | -6.781625 | 2.470685  | 16.731012 |
| O  | 3.468380  | 1.621803  | 16.411533 |
| Ti | 5.059474  | 0.591944  | 16.970298 |
| O  | 4.922711  | 0.810822  | 18.862821 |
| O  | 3.449879  | 1.511472  | 21.519742 |
| Ti | 4.952765  | 0.710407  | 20.725463 |
| O  | 5.377498  | 4.964959  | 21.054062 |
| O  | 5.417824  | 5.047810  | 16.366515 |
| O  | 6.371054  | 2.160815  | 16.546173 |
| Ti | 7.058622  | 4.044036  | 16.803028 |
| O  | 6.912156  | 4.126877  | 18.674869 |
| O  | 6.363675  | 2.210080  | 21.085338 |
| Ti | 6.984728  | 4.016384  | 20.546387 |
| O  | 8.499755  | 5.163280  | 21.033036 |

|    |            |           |           |
|----|------------|-----------|-----------|
| O  | 8.448052   | 5.479716  | 16.302242 |
| Ti | -6.923354  | 0.570678  | 16.884071 |
| O  | -6.568452  | 0.354288  | 18.779354 |
| O  | -7.754291  | -0.900134 | 21.234427 |
| Ti | -6.340599  | 0.251862  | 20.622056 |
| O  | -5.250685  | -0.274912 | 16.342386 |
| Ti | -3.527105  | -1.174315 | 16.889574 |
| O  | -3.442753  | -1.231668 | 18.791332 |
| O  | -4.816170  | -0.621372 | 21.240454 |
| Ti | -3.211844  | -1.426866 | 20.628566 |
| O  | -1.389398  | -2.582917 | 20.944549 |
| O  | -1.672659  | -2.368819 | 16.889540 |
| O  | -2.222015  | 0.300467  | 16.611160 |
| O  | -1.890967  | -0.052562 | 21.155925 |
| Ti | -0.073838  | -1.119151 | 20.688660 |
| O  | -0.000968  | -1.050442 | 18.849897 |
| Ti | -0.336990  | -0.885808 | 16.953317 |
| Ti | -9.785433  | -5.543830 | 16.978961 |
| Ti | -9.234573  | -5.591336 | 19.743253 |
| O  | -9.982609  | -3.667126 | 16.687420 |
| Ti | -8.546632  | -2.428323 | 16.896902 |
| O  | -8.091108  | -2.403575 | 18.755205 |
| O  | -9.340441  | -4.018495 | 20.722759 |
| Ti | -7.969982  | -2.653006 | 20.587262 |
| O  | -8.176558  | -5.453291 | 18.143457 |
| O  | -8.450830  | -0.525486 | 16.686249 |
| O  | -7.013004  | -3.495278 | 16.322151 |
| Ti | -5.440837  | -4.570814 | 16.932791 |
| O  | -10.743607 | -5.881373 | 18.584866 |
| O  | -5.252206  | -3.881729 | 18.693509 |
| O  | -6.606688  | -3.696102 | 21.351959 |
| Ti | -5.151379  | -4.460686 | 20.449097 |
| Ti | -7.283504  | -8.013505 | 16.656555 |
| O  | -9.225784  | -7.312309 | 16.189570 |
| O  | -5.872946  | -6.245885 | 19.914330 |
| O  | -5.568591  | -8.664702 | 20.898967 |
| O  | -7.622232  | -8.546669 | 18.458095 |
| Ti | -6.973462  | -7.767678 | 20.023649 |
| O  | -8.589325  | -7.042716 | 20.743677 |
| O  | -6.214618  | -6.396237 | 16.495314 |
| O  | -2.767343  | -9.009908 | 16.053175 |
| O  | -2.411649  | -8.612435 | 20.972641 |
| O  | -3.552945  | -5.831793 | 21.020162 |
| Ti | -3.964255  | -7.652546 | 20.407563 |
| O  | -3.816323  | -7.747176 | 18.560673 |
| O  | -3.716776  | -5.774350 | 16.775257 |
| Ti | -4.183845  | -7.788951 | 16.692510 |
| O  | -5.695466  | -9.016850 | 16.583260 |
| O  | -4.132745  | -3.084788 | 16.435959 |
| O  | -3.770949  | -3.275079 | 21.226279 |
| O  | -0.589190  | -5.330453 | 21.387223 |
| Ti | -2.075298  | -4.436842 | 20.654475 |

|    |           |           |           |
|----|-----------|-----------|-----------|
| O  | -2.121528 | -4.497456 | 18.807941 |
| O  | -0.782665 | -5.399051 | 16.304563 |
| Ti | -2.301183 | -4.289637 | 16.895619 |
| O  | 1.368247  | -1.761317 | 16.414715 |
| Ti | 2.986312  | -2.756300 | 16.936247 |
| O  | 2.851739  | -2.615626 | 18.823453 |
| O  | 1.435509  | -1.903222 | 21.496765 |
| Ti | 2.942398  | -2.664447 | 20.686950 |
| O  | 4.293102  | -1.247026 | 16.580168 |
| O  | 4.234269  | -1.176085 | 21.031869 |
| Ti | 0.979520  | -6.130278 | 16.860199 |
| O  | 0.926185  | -5.339717 | 18.596048 |
| Ti | 0.948242  | -5.783826 | 20.407248 |
| Ti | -0.866938 | -9.595955 | 16.553058 |
| O  | 0.257518  | -7.586028 | 19.800614 |
| O  | -1.290534 | -9.854030 | 18.408890 |
| Ti | -0.841437 | -9.106198 | 20.054547 |
| O  | 0.172529  | -7.962227 | 16.415385 |
| O  | 2.259725  | -4.604756 | 16.419107 |
| O  | 2.309748  | -4.533106 | 21.140708 |

48c-like 3-D (0,0,0)-mer

|    |           |           |           |
|----|-----------|-----------|-----------|
| Ti | 2.429729  | -4.133114 | 1.338618  |
| O  | 2.587535  | -5.537653 | 0.033922  |
| Ti | 2.432716  | -4.448857 | -1.486018 |
| O  | 2.527544  | -2.890932 | -0.220874 |
| O  | 0.833430  | -4.313841 | -2.338752 |
| O  | 0.763745  | -4.324478 | 2.051523  |
| O  | 0.106632  | -1.484340 | 2.142860  |
| Ti | -0.930037 | -3.391561 | 1.944884  |
| O  | -0.759951 | -3.244917 | -0.047212 |
| O  | -0.021906 | -1.409852 | -2.454543 |
| Ti | -0.671721 | -3.170506 | -1.867765 |
| O  | -2.136378 | -4.155170 | -2.682226 |
| O  | -2.537560 | -1.620575 | -2.012112 |
| O  | -2.584495 | -1.885345 | 1.431668  |
| O  | -2.530544 | -4.508345 | 2.082903  |
| O  | -4.023687 | -3.981317 | -0.452724 |
| Ti | -3.787699 | -3.386255 | 1.310694  |
| O  | -5.582769 | -2.828270 | 1.685827  |
| Ti | -3.600366 | -3.173156 | -2.077094 |
| O  | -5.269345 | -2.525704 | -2.772535 |
| Ti | -5.911348 | -1.067899 | -1.811835 |
| Ti | -5.965677 | -1.168111 | 0.985322  |
| O  | -5.954264 | 0.590457  | -2.661157 |
| Ti | -4.811162 | 1.802475  | -1.734664 |
| O  | -5.567283 | 1.900721  | 0.001560  |
| O  | -5.947722 | 0.188008  | 2.293370  |
| Ti | -4.661897 | 1.951767  | 1.665686  |
| O  | -4.636465 | -0.798650 | -0.377312 |
| O  | -4.416809 | 3.618338  | -2.161289 |
| O  | -3.067487 | 1.192255  | -2.165315 |

|    |           |           |           |
|----|-----------|-----------|-----------|
| Ti | -1.563953 | 0.089089  | -1.851980 |
| O  | -7.215303 | -1.330274 | -0.462978 |
| O  | -1.215018 | 0.273658  | -0.078315 |
| O  | -3.254878 | 0.773979  | 2.085333  |
| Ti | -1.638558 | -0.158769 | 1.732790  |
| O  | -4.512169 | 3.906018  | 2.249415  |
| O  | 3.986417  | -3.880642 | -2.333089 |
| Ti | 6.110601  | 1.461137  | 1.835098  |
| Ti | 5.579776  | 1.106133  | -0.993412 |
| O  | 6.059428  | -0.480087 | 2.232442  |
| Ti | 4.860513  | -2.012430 | 1.866182  |
| O  | 5.202379  | -2.539804 | 0.161486  |
| O  | 5.413550  | -0.594502 | -1.603250 |
| Ti | 4.201784  | -2.145068 | -1.497631 |
| O  | 4.424023  | 1.328218  | 0.574424  |
| O  | 3.846810  | -3.869991 | 2.570033  |
| O  | 3.175511  | -1.201554 | 2.015609  |
| Ti | 1.609096  | -0.117248 | 1.773635  |
| O  | 7.049060  | 1.483867  | 0.210793  |
| O  | 1.416085  | -0.192878 | -0.080924 |
| O  | 2.934468  | -1.182254 | -2.533005 |
| Ti | 1.475451  | -0.192606 | -1.943837 |
| Ti | 3.681625  | 3.210879  | 1.356078  |
| O  | 5.334036  | 3.222278  | 2.236273  |
| O  | 2.450110  | 1.556595  | -1.894734 |
| O  | 1.940151  | 3.980609  | -2.813973 |
| O  | 3.735544  | 4.037063  | -0.343258 |
| Ti | 3.429089  | 3.163647  | -1.966452 |
| O  | 5.160686  | 2.427544  | -2.264701 |
| O  | 2.424089  | 1.766513  | 2.060055  |
| Ti | -2.822153 | 3.962247  | -1.235939 |
| O  | -2.873234 | 5.525332  | -0.112782 |
| Ti | -2.765795 | 4.623069  | 1.522250  |
| O  | -3.044822 | 2.901970  | 0.386831  |
| O  | -0.947862 | 4.235403  | 1.801690  |
| O  | -1.192155 | 3.795458  | -2.104225 |
| O  | -0.061030 | 1.186688  | -2.665807 |
| Ti | 0.522233  | 2.947581  | -2.016741 |
| O  | 0.808885  | 3.041251  | -0.157767 |
| O  | -0.220402 | 1.331906  | 2.109815  |
| Ti | 0.586005  | 3.143154  | 1.709861  |
| O  | 2.239620  | 4.363347  | 2.128923  |
| Ti | 3.841269  | -2.428028 | 7.292065  |
| O  | 3.892203  | -3.992008 | 6.169914  |
| Ti | 3.784257  | -3.091244 | 4.534156  |
| O  | 4.062627  | -1.368805 | 5.668576  |
| O  | 1.966207  | -2.703764 | 4.254834  |
| O  | 2.210708  | -2.262349 | 8.160092  |
| O  | 1.078576  | 0.344987  | 8.722025  |
| Ti | 0.495530  | -1.416245 | 8.072999  |
| O  | 0.208333  | -1.510031 | 6.214044  |
| O  | 1.237822  | 0.199415  | 3.946819  |

|    |           |           |          |
|----|-----------|-----------|----------|
| Ti | 0.431397  | -1.611986 | 4.346501 |
| O  | -1.222052 | -2.831998 | 3.927562 |
| O  | -1.406375 | -0.235449 | 3.995471 |
| O  | -1.433069 | -0.025475 | 7.951145 |
| O  | -0.922637 | -2.448972 | 8.870234 |
| O  | -2.718145 | -2.504994 | 6.399762 |
| Ti | -2.410826 | -1.632493 | 8.022848 |
| O  | -4.143296 | -0.896140 | 8.321324 |
| Ti | -2.664035 | -1.679328 | 4.701755 |
| O  | -4.317822 | -1.689827 | 3.820337 |
| Ti | -5.093025 | 0.071533  | 4.222373 |
| Ti | -4.561338 | 0.426140  | 7.050474 |
| O  | -5.041170 | 2.013505  | 3.824113 |
| Ti | -3.841787 | 3.543428  | 4.190419 |
| O  | -4.184878 | 4.074022  | 5.895455 |
| O  | -4.395045 | 2.126406  | 7.660302 |
| Ti | -3.184001 | 3.677527  | 7.553943 |
| O  | -3.406127 | 0.203322  | 5.481762 |
| O  | -2.828701 | 5.402275  | 3.484613 |
| O  | -2.157926 | 2.733031  | 4.041187 |
| Ti | -0.591806 | 1.648687  | 4.283268 |
| O  | -6.031316 | 0.048974  | 5.846050 |
| O  | -0.397698 | 1.724041  | 6.137711 |
| O  | -1.916393 | 2.714407  | 8.589438 |
| Ti | -0.457975 | 1.723866  | 7.999810 |
| O  | -2.968405 | 5.413006  | 8.389494 |
| O  | 5.531295  | -2.373388 | 3.806295 |
| Ti | 6.930077  | 2.600679  | 7.869723 |
| Ti | 6.983855  | 2.698397  | 5.072555 |
| O  | 6.973761  | 0.941654  | 8.718521 |
| Ti | 5.830172  | -0.268464 | 7.792065 |
| O  | 6.583388  | -0.367243 | 6.054141 |
| O  | 6.965699  | 1.344390  | 3.761918 |
| Ti | 5.679975  | -0.419109 | 4.392124 |
| O  | 5.655138  | 2.330431  | 6.435527 |
| O  | 5.436179  | -2.084268 | 8.217330 |
| O  | 4.086254  | 0.340726  | 8.221978 |
| Ti | 2.581573  | 1.441962  | 7.909130 |
| O  | 8.233431  | 2.863754  | 6.520085 |
| O  | 2.233478  | 1.257350  | 6.134089 |
| O  | 4.273118  | 0.759140  | 3.970348 |
| Ti | 2.655881  | 1.690184  | 4.322683 |
| Ti | 4.617861  | 4.704649  | 8.133477 |
| O  | 6.286229  | 4.059052  | 8.829877 |
| O  | 3.601864  | 3.416922  | 4.624696 |
| O  | 3.548232  | 6.039977  | 3.973711 |
| O  | 5.041093  | 5.512516  | 6.509060 |
| Ti | 4.804681  | 4.917598  | 4.745765 |
| O  | 6.600404  | 4.361644  | 4.367861 |
| O  | 3.555458  | 3.152832  | 8.068379 |
| Ti | -1.411193 | 5.666341  | 4.718075 |
| O  | -1.568899 | 7.070487  | 6.023125 |

|    |           |          |          |
|----|-----------|----------|----------|
| Ti | -1.414153 | 5.981123 | 7.542511 |
| O  | -1.509338 | 4.423799 | 6.276885 |
| O  | 0.184913  | 5.845513 | 8.395628 |
| O  | 0.254752  | 5.857612 | 4.004542 |
| O  | 0.910929  | 3.015622 | 3.913701 |
| Ti | 1.947393  | 4.922781 | 4.111604 |
| O  | 1.777047  | 4.775834 | 6.103602 |
| O  | 1.039494  | 2.941400 | 8.511108 |
| Ti | 1.689456  | 4.701268 | 7.924150 |
| O  | 3.153173  | 5.687191 | 8.738465 |

48c-like 3-D (0,0,1)-mer

|    |           |           |           |
|----|-----------|-----------|-----------|
| Ti | 2.534377  | -4.111995 | 1.462184  |
| O  | 2.810064  | -5.551889 | 0.210561  |
| Ti | 2.616418  | -4.520946 | -1.337171 |
| O  | 2.562410  | -2.923927 | -0.138610 |
| O  | 0.991580  | -4.495593 | -2.170674 |
| O  | 0.876352  | -4.326274 | 2.166310  |
| O  | 0.139192  | -1.464390 | 2.187538  |
| Ti | -0.824675 | -3.403969 | 2.020403  |
| O  | -0.719580 | -3.172936 | 0.017896  |
| O  | -0.064086 | -1.480757 | -2.391082 |
| Ti | -0.433319 | -3.253755 | -1.786314 |
| O  | -1.950535 | -3.840432 | -2.762190 |
| O  | -2.895088 | -1.251914 | -2.493296 |
| O  | -2.609809 | -1.910749 | 2.034035  |
| O  | -2.353745 | -4.577000 | 1.899494  |
| O  | -3.765213 | -3.942026 | -0.625611 |
| Ti | -3.656844 | -3.444535 | 1.176920  |
| O  | -5.347258 | -3.182541 | 1.910981  |
| Ti | -3.548494 | -2.996223 | -2.221219 |
| O  | -5.407300 | -2.506451 | -2.416099 |
| Ti | -5.707527 | -1.090890 | -1.240143 |
| Ti | -5.619791 | -1.287364 | 1.590189  |
| O  | -5.730006 | 0.580476  | -2.051167 |
| Ti | -4.774546 | 2.063662  | -1.351525 |
| O  | -5.644776 | 2.217403  | 0.294293  |
| O  | -5.887901 | 0.503792  | 2.402442  |
| Ti | -4.597419 | 2.157014  | 1.880125  |
| O  | -4.291378 | -1.195550 | 0.134660  |
| O  | -4.474623 | 3.814488  | -2.082998 |
| O  | -2.963387 | 1.512118  | -1.751629 |
| Ti | -1.696309 | 0.108469  | -1.910687 |
| O  | -6.927822 | -1.274184 | 0.198444  |
| O  | -1.268373 | -0.149512 | -0.130270 |
| O  | -3.117868 | 0.994949  | 1.934411  |
| Ti | -1.627319 | -0.137340 | 1.707727  |
| O  | -4.310147 | 4.072593  | 2.520686  |
| O  | 4.121005  | -3.895656 | -2.212998 |
| Ti | 6.259826  | 1.514524  | 1.715908  |
| Ti | 5.560529  | 1.134556  | -1.034981 |
| O  | 6.182003  | -0.407428 | 2.219901  |



|    |           |           |           |
|----|-----------|-----------|-----------|
| Ti | 4.878445  | -1.901520 | 1.971101  |
| O  | 5.181514  | -2.440897 | 0.255727  |
| O  | 5.396354  | -0.576171 | -1.648697 |
| Ti | 4.214279  | -2.108190 | -1.436060 |
| O  | 4.514747  | 1.346795  | 0.606915  |
| O  | 3.908014  | -3.775482 | 2.706797  |
| O  | 3.215662  | -1.095240 | 2.097239  |
| Ti | 1.586359  | -0.116065 | 1.801038  |
| O  | 7.121942  | 1.478796  | 0.053581  |
| O  | 1.413449  | -0.146693 | -0.062050 |
| O  | 2.846608  | -1.257256 | -2.439099 |
| Ti | 1.402310  | -0.188915 | -1.914992 |
| Ti | 3.743927  | 3.233302  | 1.503885  |
| O  | 5.578538  | 3.255211  | 2.093985  |
| O  | 2.376582  | 1.541029  | -1.973690 |
| O  | 1.870001  | 4.006015  | -2.768861 |
| O  | 3.655666  | 3.990261  | -0.245657 |
| Ti | 3.322217  | 3.176107  | -1.878846 |
| O  | 5.067000  | 2.468800  | -2.243829 |
| O  | 2.464255  | 1.768939  | 2.010828  |
| Ti | -2.803010 | 4.110681  | -1.273694 |
| O  | -2.766695 | 5.666998  | -0.151242 |
| Ti | -2.691807 | 4.784798  | 1.513955  |
| O  | -3.121623 | 3.089986  | 0.385339  |
| O  | -0.893195 | 4.349645  | 1.755644  |
| O  | -1.210659 | 3.905874  | -2.238812 |
| O  | -0.159052 | 1.142990  | -2.706710 |
| Ti | 0.415052  | 2.935129  | -2.102666 |
| O  | 0.628033  | 2.909188  | -0.240615 |
| O  | -0.207469 | 1.325160  | 2.055547  |
| Ti | 0.577112  | 3.166343  | 1.619622  |
| O  | 2.134627  | 4.439007  | 1.922514  |
| Ti | 3.524213  | -3.154215 | 7.509401  |
| O  | 3.732730  | -4.351089 | 6.051110  |
| Ti | 3.781473  | -3.016610 | 4.684944  |
| O  | 4.187289  | -1.753369 | 6.305774  |
| O  | 2.046510  | -2.445924 | 4.435058  |
| O  | 1.799395  | -3.024453 | 8.116285  |
| O  | 1.115414  | -0.027629 | 8.290824  |
| Ti | 0.176293  | -1.981766 | 8.232391  |
| O  | 0.040208  | -1.583639 | 6.324925  |
| O  | 1.299934  | 0.250567  | 3.963093  |
| Ti | 0.346219  | -1.531191 | 4.505929  |
| O  | -1.133891 | -2.825668 | 3.971718  |
| O  | -1.501046 | -0.165359 | 3.996603  |
| O  | -1.744276 | -0.409525 | 8.221341  |
| O  | -1.421245 | -3.116932 | 8.406479  |
| O  | -2.962173 | -2.595524 | 5.916842  |
| Ti | -2.745073 | -2.042381 | 7.681124  |
| O  | -4.595991 | -1.528360 | 7.981432  |
| Ti | -2.818002 | -1.629918 | 4.297923  |
| O  | -4.654650 | -1.363416 | 3.593816  |

|    |           |           |          |
|----|-----------|-----------|----------|
| Ti | -5.249158 | 0.397227  | 4.354149 |
| Ti | -4.912299 | 0.085993  | 7.154541 |
| O  | -4.723127 | 2.185874  | 4.062630 |
| Ti | -3.511711 | 3.839903  | 4.437962 |
| O  | -4.543676 | 3.672026  | 6.088661 |
| O  | -4.931072 | 1.580475  | 8.350030 |
| Ti | -3.867997 | 3.315984  | 7.758711 |
| O  | -3.671999 | 0.041549  | 5.653204 |
| O  | -2.796451 | 5.816129  | 3.329651 |
| O  | -1.959776 | 2.849576  | 4.078802 |
| Ti | -0.499504 | 1.664262  | 4.224641 |
| O  | -6.335843 | 0.228167  | 5.888594 |
| O  | -0.342911 | 1.267136  | 6.043547 |
| O  | -2.277757 | 2.380881  | 7.840225 |
| Ti | -0.677185 | 1.302822  | 7.864527 |
| O  | -3.436980 | 5.258768  | 8.179113 |
| O  | 5.473594  | -2.194189 | 3.933784 |
| Ti | 7.285369  | 2.666731  | 7.760731 |
| Ti | 6.949405  | 2.976910  | 4.960069 |
| O  | 6.760610  | 0.877982  | 8.052297 |
| Ti | 5.548681  | -0.775578 | 7.676295 |
| O  | 6.579769  | -0.606409 | 6.024717 |
| O  | 6.967720  | 1.484374  | 3.764735 |
| Ti | 5.904207  | -0.251577 | 4.354588 |
| O  | 5.708522  | 3.020903  | 6.460940 |
| O  | 4.833883  | -2.751275 | 8.783692 |
| O  | 3.996028  | 0.214375  | 8.034986 |
| Ti | 2.534519  | 1.398259  | 7.888310 |
| O  | 8.372536  | 2.835712  | 6.226718 |
| O  | 2.378254  | 1.794130  | 6.069409 |
| O  | 4.313607  | 0.683816  | 4.272436 |
| Ti | 2.712297  | 1.759974  | 4.248304 |
| Ti | 4.853409  | 4.693405  | 7.815045 |
| O  | 6.690007  | 4.427414  | 8.520627 |
| O  | 3.779033  | 3.472201  | 3.891869 |
| O  | 3.457654  | 6.179832  | 3.706475 |
| O  | 4.997639  | 5.657531  | 6.195608 |
| Ti | 4.781435  | 5.105001  | 4.431140 |
| O  | 6.632516  | 4.590302  | 4.133204 |
| O  | 3.536112  | 3.228246  | 8.115589 |
| Ti | -1.487210 | 6.219110  | 4.603680 |
| O  | -1.695879 | 7.415689  | 6.062290 |
| Ti | -1.744829 | 6.081268  | 7.428169 |
| O  | -2.150502 | 4.818366  | 5.807372 |
| O  | -0.010471 | 5.510012  | 7.678542 |
| O  | 0.237416  | 6.088691  | 3.996495 |
| O  | 0.919963  | 3.090543  | 3.822274 |
| Ti | 1.859805  | 5.044598  | 3.880581 |
| O  | 1.994867  | 4.645905  | 5.788098 |
| O  | 0.735240  | 2.812220  | 8.149670 |
| Ti | 1.689249  | 4.594026  | 7.606912 |
| O  | 3.169808  | 5.888491  | 8.141146 |

|    |           |           |           |
|----|-----------|-----------|-----------|
| Ti | 4.841088  | -1.043863 | 13.385833 |
| O  | 4.805036  | -2.601597 | 12.265556 |
| Ti | 4.728136  | -1.721264 | 10.599460 |
| O  | 5.154902  | -0.024488 | 11.726374 |
| O  | 2.928710  | -1.287532 | 10.357702 |
| O  | 3.248339  | -0.839422 | 14.350482 |
| O  | 2.194344  | 1.921164  | 14.819348 |
| Ti | 1.620966  | 0.128955  | 14.215207 |
| O  | 1.406824  | 0.153922  | 12.353286 |
| O  | 2.242195  | 1.738075  | 10.057472 |
| Ti | 1.458649  | -0.103838 | 10.493198 |
| O  | -0.099338 | -1.375784 | 10.190404 |
| O  | -0.429069 | 1.294150  | 10.102247 |
| O  | -0.341075 | 1.523470  | 14.087087 |
| O  | 0.166412  | -0.941889 | 14.881772 |
| O  | -1.620350 | -0.926999 | 12.358641 |
| Ti | -1.286402 | -0.112429 | 13.991834 |
| O  | -3.031078 | 0.594611  | 14.356755 |
| Ti | -1.708751 | -0.170081 | 10.608751 |
| O  | -3.543563 | -0.190074 | 10.020274 |
| Ti | -4.223960 | 1.550367  | 10.397696 |
| Ti | -3.524118 | 1.929731  | 13.148615 |
| O  | -4.145989 | 3.471324  | 9.893178  |
| Ti | -2.842372 | 4.966596  | 10.141103 |
| O  | -3.146077 | 5.506027  | 11.857616 |
| O  | -3.360338 | 3.640206  | 13.762076 |
| Ti | -2.178596 | 5.172935  | 13.548362 |
| O  | -2.478682 | 1.717502  | 11.506618 |
| O  | -1.872001 | 6.840445  | 9.404475  |
| O  | -1.180031 | 4.158991  | 10.015925 |
| Ti | 0.448568  | 3.178900  | 10.311935 |
| O  | -5.085930 | 1.586237  | 12.060159 |
| O  | 0.622399  | 3.210579  | 12.174645 |
| O  | -0.810700 | 4.321702  | 14.551882 |
| Ti | 0.633121  | 3.253129  | 14.027520 |
| O  | -2.084970 | 6.960020  | 14.325807 |
| O  | 6.346850  | -1.007889 | 9.594026  |
| Ti | 7.744997  | 4.158431  | 13.354471 |
| Ti | 7.655003  | 4.351890  | 10.524082 |
| O  | 7.770972  | 2.487487  | 14.167820 |
| Ti | 6.813899  | 1.005351  | 13.470104 |
| O  | 7.679283  | 0.850694  | 11.822045 |
| O  | 7.923720  | 2.561119  | 9.713137  |
| Ti | 6.632203  | 0.907854  | 10.235116 |
| O  | 6.328273  | 4.258878  | 11.980846 |
| O  | 6.512204  | -0.746908 | 14.196632 |
| O  | 5.003423  | 1.556705  | 13.868080 |
| Ti | 3.731373  | 2.956941  | 14.024177 |
| O  | 8.964392  | 4.341794  | 11.915609 |
| O  | 3.303915  | 3.209923  | 12.243077 |
| O  | 5.153374  | 2.070288  | 10.177311 |
| Ti | 3.661593  | 3.201041  | 10.404952 |

|    |           |          |           |
|----|-----------|----------|-----------|
| Ti | 5.583515  | 6.061927 | 14.333715 |
| O  | 7.443066  | 5.574442 | 14.529649 |
| O  | 4.645481  | 4.974233 | 10.080185 |
| O  | 4.387909  | 7.641516 | 10.212209 |
| O  | 5.800310  | 7.006664 | 12.737067 |
| Ti | 5.691152  | 6.509752 | 10.934658 |
| O  | 7.381622  | 6.246707 | 10.201083 |
| O  | 4.929372  | 4.319289 | 14.605987 |
| Ti | -0.498165 | 7.177014 | 10.650776 |
| O  | -0.773491 | 8.616641 | 11.902874 |
| Ti | -0.579696 | 7.585026 | 13.450155 |
| O  | -0.527041 | 5.988511 | 12.251014 |
| O  | 1.044559  | 7.559965 | 14.283622 |
| O  | 1.159764  | 7.390819 | 9.945944  |
| O  | 1.895912  | 4.527537 | 9.925692  |
| Ti | 2.859655  | 6.467683 | 10.092224 |
| O  | 2.755283  | 6.235840 | 12.094527 |
| O  | 2.099995  | 4.544651 | 14.503931 |
| Ti | 2.468811  | 6.317840 | 13.898916 |
| O  | 3.987440  | 6.906926 | 14.874037 |

48c-like 3-D (0,0,2)-mer

|    |           |           |           |
|----|-----------|-----------|-----------|
| Ti | 2.489640  | -4.124021 | 1.339654  |
| O  | 2.757928  | -5.507738 | 0.017724  |
| Ti | 2.563252  | -4.407457 | -1.481507 |
| O  | 2.538689  | -2.858661 | -0.207073 |
| O  | 0.942180  | -4.315350 | -2.311071 |
| O  | 0.838810  | -4.406106 | 2.018361  |
| O  | 0.068305  | -1.527128 | 2.092597  |
| Ti | -0.856697 | -3.465528 | 1.897015  |
| O  | -0.775844 | -3.113348 | -0.088261 |
| O  | -0.009975 | -1.362838 | -2.482552 |
| Ti | -0.532211 | -3.127849 | -1.900613 |
| O  | -2.028157 | -3.887192 | -2.810448 |
| O  | -2.753643 | -1.368418 | -2.227911 |
| O  | -2.661613 | -1.989176 | 2.027008  |
| O  | -2.383603 | -4.631750 | 1.783401  |
| O  | -3.898067 | -4.038301 | -0.632413 |
| Ti | -3.750489 | -3.505029 | 1.160831  |
| O  | -5.416321 | -3.290352 | 1.970832  |
| Ti | -3.592105 | -3.033846 | -2.169479 |
| O  | -5.393163 | -2.375620 | -2.346167 |
| Ti | -5.681901 | -1.033392 | -1.073855 |
| Ti | -5.709947 | -1.383417 | 1.766653  |
| O  | -5.620117 | 0.658517  | -1.758714 |
| Ti | -4.537169 | 2.180675  | -1.227329 |
| O  | -5.539119 | 2.236536  | 0.422244  |
| O  | -5.983655 | 0.366906  | 2.704967  |
| Ti | -4.808635 | 1.922506  | 2.095901  |
| O  | -4.314808 | -1.263439 | 0.346739  |
| O  | -4.366595 | 3.909381  | -2.105467 |
| O  | -2.949506 | 1.424034  | -2.019839 |

|    |           |           |           |
|----|-----------|-----------|-----------|
| Ti | -1.598762 | 0.155346  | -1.915498 |
| O  | -6.954452 | -1.257804 | 0.342259  |
| O  | -1.245318 | 0.017570  | -0.112724 |
| O  | -3.211799 | 0.979267  | 1.958298  |
| Ti | -1.731633 | -0.200303 | 1.691358  |
| O  | -4.381030 | 3.875722  | 2.499353  |
| O  | 4.090295  | -3.756866 | -2.298219 |
| Ti | 6.207750  | 1.562660  | 2.040905  |
| Ti | 5.632106  | 1.217337  | -0.785592 |
| O  | 6.064375  | -0.394270 | 2.383190  |
| Ti | 4.843125  | -1.893064 | 1.982432  |
| O  | 5.155957  | -2.427100 | 0.273622  |
| O  | 5.416452  | -0.467879 | -1.428877 |
| Ti | 4.193306  | -2.013360 | -1.421477 |
| O  | 4.522613  | 1.423442  | 0.838032  |
| O  | 3.787775  | -3.821775 | 2.673723  |
| O  | 3.142782  | -1.167032 | 2.132412  |
| Ti | 1.501072  | -0.199864 | 1.786298  |
| O  | 7.127990  | 1.570993  | 0.404719  |
| O  | 1.474364  | -0.175256 | -0.094472 |
| O  | 2.950071  | -1.106729 | -2.521261 |
| Ti | 1.475284  | -0.101851 | -1.942898 |
| Ti | 3.635516  | 3.188389  | 1.610648  |
| O  | 5.489417  | 3.369737  | 2.421348  |
| O  | 2.475348  | 1.615954  | -1.875716 |
| O  | 1.949654  | 4.092541  | -2.645729 |
| O  | 3.704453  | 4.020929  | -0.094921 |
| Ti | 3.392230  | 3.239684  | -1.757074 |
| O  | 5.172790  | 2.545868  | -2.014466 |
| O  | 2.342431  | 1.704844  | 2.013632  |
| Ti | -2.742005 | 4.383909  | -1.321472 |
| O  | -2.831513 | 5.756093  | -0.014372 |
| Ti | -2.790350 | 4.619036  | 1.521564  |
| O  | -2.989642 | 3.101090  | 0.137726  |
| O  | -1.003625 | 4.223859  | 1.848585  |
| O  | -1.142892 | 4.108088  | -2.236706 |
| O  | -0.059413 | 1.260692  | -2.691054 |
| Ti | 0.440644  | 3.048861  | -2.056012 |
| O  | 0.572453  | 2.924050  | -0.207783 |
| O  | -0.297791 | 1.248918  | 2.103297  |
| Ti | 0.489174  | 3.078975  | 1.672539  |
| O  | 2.015919  | 4.398151  | 1.893005  |
| Ti | 3.589424  | -2.801326 | 7.390014  |
| O  | 3.742626  | -4.199763 | 6.096627  |
| Ti | 3.701756  | -3.056249 | 4.598884  |
| O  | 4.275438  | -1.557075 | 6.079111  |
| O  | 1.959943  | -2.440476 | 4.530443  |
| O  | 1.868399  | -2.663417 | 7.995686  |
| O  | 1.150911  | 0.014018  | 8.319869  |
| Ti | 0.131927  | -1.876988 | 8.307379  |
| O  | -0.436517 | -1.732538 | 6.337266  |
| O  | 1.237801  | 0.109360  | 3.975502  |

|    |           |           |          |
|----|-----------|-----------|----------|
| Ti | 0.214598  | -1.596035 | 4.549188 |
| O  | -1.086349 | -2.952857 | 3.866736 |
| O  | -1.550330 | -0.290988 | 3.916309 |
| O  | -1.723251 | -0.435648 | 8.157448 |
| O  | -1.239375 | -3.249873 | 8.448822 |
| O  | -2.973830 | -3.057751 | 5.682934 |
| Ti | -2.432468 | -2.339988 | 7.340557 |
| O  | -4.138877 | -1.819007 | 7.974830 |
| Ti | -2.855658 | -1.834977 | 4.264454 |
| O  | -4.726169 | -1.498806 | 3.719985 |
| Ti | -5.119871 | 0.232742  | 4.691799 |
| Ti | -4.291183 | 0.004927  | 7.473881 |
| O  | -4.704586 | 2.044570  | 4.264228 |
| Ti | -3.625948 | 3.795619  | 4.460538 |
| O  | -4.635766 | 4.029113  | 6.034265 |
| O  | -4.650293 | 1.906400  | 8.062002 |
| Ti | -3.646343 | 3.681072  | 7.605788 |
| O  | -3.372491 | -0.210758 | 5.674706 |
| O  | -2.839591 | 5.584739  | 3.429803 |
| O  | -2.044111 | 2.761714  | 4.309581 |
| Ti | -0.598666 | 1.573850  | 4.238785 |
| O  | -5.914663 | 0.100415  | 6.339974 |
| O  | -0.311099 | 0.985741  | 6.004819 |
| O  | -2.095832 | 2.582558  | 7.699799 |
| Ti | -0.683622 | 1.331011  | 7.789132 |
| O  | -3.323795 | 5.564191  | 8.308526 |
| O  | 5.473088  | -2.343523 | 3.898420 |
| Ti | 7.409517  | 2.662115  | 8.052072 |
| Ti | 7.139015  | 2.761174  | 5.246831 |
| O  | 7.087520  | 0.814027  | 8.407220 |
| Ti | 5.774882  | -0.652006 | 7.859650 |
| O  | 6.698915  | -0.647455 | 6.196083 |
| O  | 6.930276  | 1.318833  | 4.024362 |
| Ti | 5.744858  | -0.447510 | 4.575161 |
| O  | 5.857262  | 2.806074  | 6.722636 |
| O  | 4.884352  | -2.512078 | 8.733067 |
| O  | 4.187143  | 0.314281  | 8.035278 |
| Ti | 2.604287  | 1.377661  | 7.951284 |
| O  | 8.543804  | 2.732919  | 6.555142 |
| O  | 2.335723  | 1.716165  | 6.133859 |
| O  | 4.251809  | 0.637609  | 4.315074 |
| Ti | 2.588642  | 1.597413  | 4.304950 |
| Ti | 4.945278  | 4.644834  | 7.717039 |
| O  | 6.741889  | 4.460510  | 8.592066 |
| O  | 3.616563  | 3.313121  | 3.927207 |
| O  | 3.622688  | 5.945248  | 3.575813 |
| O  | 5.111525  | 5.327925  | 5.974740 |
| Ti | 4.962412  | 4.793892  | 4.155152 |
| O  | 6.903615  | 4.287693  | 4.314998 |
| O  | 3.599084  | 3.221986  | 8.162181 |
| Ti | -1.460758 | 6.002035  | 4.668451 |
| O  | -1.601807 | 7.385452  | 5.976388 |

|    |           |           |           |
|----|-----------|-----------|-----------|
| Ti | -1.635532 | 6.255160  | 7.498829  |
| O  | -2.146428 | 4.768622  | 6.033331  |
| O  | 0.081096  | 5.638445  | 7.746242  |
| O  | 0.251988  | 5.914398  | 4.022871  |
| O  | 0.835184  | 2.973458  | 3.855163  |
| Ti | 1.932071  | 4.936543  | 3.870792  |
| O  | 1.967164  | 4.603288  | 5.779729  |
| O  | 0.769574  | 2.817941  | 8.104759  |
| Ti | 1.707909  | 4.580091  | 7.584046  |
| O  | 3.263351  | 5.860378  | 7.971000  |
| Ti | 4.517294  | -1.402589 | 13.501705 |
| O  | 4.658110  | -2.786350 | 12.193646 |
| Ti | 4.692036  | -1.657078 | 10.670804 |
| O  | 5.202717  | -0.169447 | 12.137148 |
| O  | 2.975371  | -1.040656 | 10.423316 |
| O  | 2.804046  | -1.315891 | 14.146924 |
| O  | 2.218118  | 1.620894  | 14.314079 |
| Ti | 1.121707  | -0.341264 | 14.298308 |
| O  | 1.085897  | -0.010533 | 12.389515 |
| O  | 2.286389  | 1.777008  | 10.064422 |
| Ti | 1.346670  | 0.014710  | 10.584834 |
| O  | -0.208747 | -1.265161 | 10.197595 |
| O  | -0.544540 | 1.373466  | 10.006917 |
| O  | -0.563184 | 1.282905  | 14.242006 |
| O  | -0.568079 | -1.349574 | 14.594273 |
| O  | -2.056667 | -0.733921 | 12.194801 |
| Ti | -1.908889 | -0.199761 | 14.013907 |
| O  | -3.850163 | 0.305779  | 13.856523 |
| Ti | -1.890632 | -0.048685 | 10.452989 |
| O  | -3.686277 | 0.137445  | 9.577376  |
| Ti | -4.353402 | 1.935923  | 10.119017 |
| Ti | -4.085995 | 1.832887  | 12.923916 |
| O  | -4.023529 | 3.781701  | 9.767051  |
| Ti | -2.713527 | 5.253282  | 10.314492 |
| O  | -3.647925 | 5.240296  | 11.975073 |
| O  | -3.878066 | 3.274888  | 14.149339 |
| Ti | -2.695752 | 5.040418  | 13.595236 |
| O  | -2.802035 | 1.788152  | 11.450005 |
| O  | -1.827011 | 7.116053  | 9.436598  |
| O  | -1.127437 | 4.283970  | 10.134941 |
| Ti | 0.451445  | 3.216776  | 10.217727 |
| O  | -5.489208 | 1.862405  | 11.615121 |
| O  | 0.718806  | 2.874099  | 12.035441 |
| O  | -1.197759 | 3.960062  | 13.848074 |
| Ti | 0.463063  | 2.996895  | 13.863653 |
| O  | -2.420324 | 6.936828  | 14.269579 |
| O  | 6.382094  | -0.966765 | 9.866101  |
| Ti | 8.174821  | 4.366525  | 13.478533 |
| Ti | 7.345961  | 4.593056  | 10.696820 |
| O  | 7.761740  | 2.554369  | 13.908104 |
| Ti | 6.682461  | 0.804297  | 13.712587 |
| O  | 7.692720  | 0.570254  | 12.139498 |

|    |           |           |           |
|----|-----------|-----------|-----------|
| O  | 7.705023  | 2.692828  | 10.110328 |
| Ti | 6.703820  | 0.917012  | 10.567296 |
| O  | 6.426749  | 4.807224  | 12.495671 |
| O  | 5.895329  | -0.985366 | 14.741095 |
| O  | 5.099344  | 1.836176  | 13.861637 |
| Ti | 3.650441  | 3.019958  | 13.929492 |
| O  | 8.969667  | 4.499976  | 11.830649 |
| O  | 3.364688  | 3.607992  | 12.164046 |
| O  | 5.152418  | 2.014450  | 10.469516 |
| Ti | 3.739027  | 3.264477  | 10.379379 |
| Ti | 5.908305  | 6.431560  | 13.906924 |
| O  | 7.780558  | 6.096989  | 14.450510 |
| O  | 4.777905  | 5.031654  | 10.011950 |
| O  | 4.292537  | 7.846068  | 9.720417  |
| O  | 6.025008  | 7.653282  | 12.487599 |
| Ti | 5.485046  | 6.936719  | 10.829724 |
| O  | 7.192432  | 6.417313  | 10.193583 |
| O  | 4.602779  | 4.885723  | 14.251555 |
| Ti | -0.534198 | 7.405952  | 10.775467 |
| O  | -0.687712 | 8.799474  | 12.074772 |
| Ti | -0.650186 | 7.649377  | 13.568063 |
| O  | -1.228324 | 6.157941  | 12.080359 |
| O  | 1.090113  | 7.029963  | 13.634378 |
| O  | 1.186770  | 7.263096  | 10.172066 |
| O  | 1.904239  | 4.581545  | 9.849479  |
| Ti | 2.921445  | 6.473078  | 9.860705  |
| O  | 3.489629  | 6.327593  | 11.831110 |
| O  | 1.814697  | 4.484113  | 14.193565 |
| Ti | 2.837986  | 6.190542  | 13.618613 |
| O  | 4.136121  | 7.548061  | 14.301512 |
| Ti | 5.796150  | 0.212132  | 19.492762 |
| O  | 5.888094  | -1.158509 | 18.184461 |
| Ti | 5.845306  | -0.020564 | 16.649570 |
| O  | 6.041586  | 1.496830  | 18.036088 |
| O  | 4.058779  | 0.373282  | 16.322666 |
| O  | 4.196989  | 0.488122  | 20.407510 |
| O  | 3.112441  | 3.334706  | 20.859807 |
| Ti | 2.613135  | 1.547064  | 20.225674 |
| O  | 2.479752  | 1.670983  | 18.377233 |
| O  | 3.350284  | 3.344850  | 16.065632 |
| Ti | 2.563172  | 1.514895  | 16.497185 |
| O  | 1.036898  | 0.196596  | 16.276752 |
| O  | 0.709713  | 2.889004  | 16.154607 |
| O  | 0.577169  | 2.980517  | 20.045072 |
| O  | 1.104022  | 0.503654  | 20.816553 |
| O  | -0.651081 | 0.574103  | 18.264594 |
| Ti | -0.339491 | 1.355168  | 19.927332 |
| O  | -2.119041 | 2.049842  | 20.184803 |
| Ti | -0.582569 | 1.406224  | 16.559603 |
| O  | -2.437797 | 1.224872  | 15.749317 |
| Ti | -3.155855 | 3.031395  | 16.130965 |
| Ti | -2.577918 | 3.378379  | 18.956583 |



|    |           |           |           |
|----|-----------|-----------|-----------|
| O  | -3.010942 | 4.986668  | 15.787078 |
| Ti | -1.790037 | 6.488301  | 16.186093 |
| O  | -2.103648 | 7.025144  | 17.894704 |
| O  | -2.362571 | 5.064383  | 19.598183 |
| Ti | -1.140077 | 6.610023  | 19.589099 |
| O  | -1.469798 | 3.170744  | 17.332414 |
| O  | -0.733578 | 8.415113  | 15.491842 |
| O  | -0.090859 | 5.760907  | 16.036458 |
| Ti | 1.550897  | 4.794453  | 16.383206 |
| O  | -4.075120 | 3.025019  | 17.767617 |
| O  | 1.579800  | 4.769110  | 18.262374 |
| O  | 0.102973  | 5.703433  | 20.689410 |
| Ti | 1.577252  | 4.697535  | 20.112812 |
| O  | -1.035720 | 8.353410  | 20.465687 |
| O  | 7.436219  | 0.724793  | 15.673755 |
| Ti | 8.734522  | 5.637581  | 19.244876 |
| Ti | 8.768838  | 5.985500  | 16.401690 |
| O  | 8.668503  | 3.946672  | 19.924733 |
| Ti | 7.588171  | 2.418735  | 19.398904 |
| O  | 8.592387  | 2.363801  | 17.749615 |
| O  | 9.039458  | 4.234482  | 15.466266 |
| Ti | 7.865080  | 2.678021  | 16.075844 |
| O  | 7.368938  | 5.874644  | 17.822283 |
| O  | 7.419145  | 0.689356  | 20.277413 |
| O  | 6.004459  | 3.178390  | 20.195844 |
| Ti | 4.651095  | 4.444476  | 20.084043 |
| O  | 10.009017 | 5.860277  | 17.828430 |
| O  | 4.299081  | 4.575803  | 18.283034 |
| O  | 6.267828  | 3.620771  | 16.213245 |
| Ti | 4.782490  | 4.795301  | 16.474871 |
| Ti | 6.645864  | 7.639118  | 20.340241 |
| O  | 8.444910  | 6.975243  | 20.520522 |
| O  | 5.714329  | 6.581857  | 16.138757 |
| O  | 5.438646  | 9.221913  | 16.390625 |
| O  | 6.955149  | 8.644355  | 18.804137 |
| Ti | 6.806842  | 8.096233  | 17.015121 |
| O  | 8.472451  | 7.892547  | 16.197942 |
| O  | 5.802004  | 5.973084  | 20.386917 |
| Ti | 0.564507  | 8.719670  | 16.827683 |
| O  | 0.297381  | 10.103313 | 18.149864 |
| Ti | 0.491936  | 9.003188  | 19.649281 |
| O  | 0.514570  | 7.453986  | 18.373739 |
| O  | 2.112839  | 8.908294  | 20.478797 |
| O  | 2.215783  | 8.999841  | 16.149272 |
| O  | 2.983090  | 6.121699  | 16.076608 |
| Ti | 3.911576  | 8.059275  | 16.272826 |
| O  | 3.829182  | 7.706560  | 18.257658 |
| O  | 3.062830  | 5.956933  | 20.655266 |
| Ti | 3.589371  | 7.721065  | 20.070689 |
| O  | 5.078937  | 8.488231  | 20.982537 |

48c-like 3-D (0,0,3)-mer

|    |           |           |           |
|----|-----------|-----------|-----------|
| Ti | 2.494366  | -4.142558 | 1.264361  |
| O  | 2.748306  | -5.490564 | -0.090415 |
| Ti | 2.539928  | -4.348735 | -1.561152 |
| O  | 2.539082  | -2.834547 | -0.247041 |
| O  | 0.910391  | -4.226929 | -2.366485 |
| O  | 0.844459  | -4.449676 | 1.944534  |
| O  | 0.040639  | -1.562519 | 2.058172  |
| Ti | -0.846172 | -3.511962 | 1.867931  |
| O  | -0.798079 | -3.118998 | -0.107860 |
| O  | -0.001341 | -1.317198 | -2.534643 |
| Ti | -0.586408 | -3.066213 | -1.927955 |
| O  | -2.051203 | -3.921937 | -2.825826 |
| O  | -2.647314 | -1.426848 | -2.144462 |
| O  | -2.688466 | -2.067650 | 1.942887  |
| O  | -2.349424 | -4.746133 | 1.794048  |
| O  | -3.904268 | -4.054343 | -0.617511 |
| Ti | -3.726104 | -3.649915 | 1.194052  |
| O  | -5.397688 | -3.317335 | 1.915965  |
| Ti | -3.578465 | -3.043886 | -2.150304 |
| O  | -5.338070 | -2.324981 | -2.354775 |
| Ti | -5.658337 | -0.966367 | -1.092323 |
| Ti | -5.671818 | -1.394922 | 1.714113  |
| O  | -5.656293 | 0.712208  | -1.820079 |
| Ti | -4.520225 | 2.193096  | -1.273874 |
| O  | -5.518032 | 2.237983  | 0.383029  |
| O  | -6.023461 | 0.334272  | 2.684593  |
| Ti | -4.839402 | 1.878144  | 2.068654  |
| O  | -4.308794 | -1.071298 | 0.333271  |
| O  | -4.335742 | 3.924294  | -2.150545 |
| O  | -2.962161 | 1.396063  | -2.098393 |
| Ti | -1.572010 | 0.188984  | -1.927896 |
| O  | -6.932141 | -1.298920 | 0.296695  |
| O  | -1.237312 | 0.075840  | -0.128151 |
| O  | -3.222147 | 0.969868  | 1.972945  |
| Ti | -1.786860 | -0.254362 | 1.648974  |
| O  | -4.409859 | 3.839493  | 2.450243  |
| O  | 4.078107  | -3.700329 | -2.361846 |
| Ti | 6.056357  | 1.504334  | 2.223369  |
| Ti | 5.636846  | 1.229017  | -0.674564 |
| O  | 6.120870  | -0.486454 | 2.429574  |
| Ti | 4.867256  | -1.939120 | 1.947296  |
| O  | 5.177525  | -2.449131 | 0.232464  |
| O  | 5.424191  | -0.435327 | -1.378624 |
| Ti | 4.204689  | -1.978722 | -1.446172 |
| O  | 4.434426  | 1.412384  | 0.872145  |
| O  | 3.802682  | -3.877497 | 2.591310  |
| O  | 3.152970  | -1.209907 | 2.097272  |
| Ti | 1.492403  | -0.254375 | 1.758760  |
| O  | 7.048056  | 1.537498  | 0.605216  |
| O  | 1.452191  | -0.219704 | -0.120723 |
| O  | 2.973875  | -1.061899 | -2.554824 |
| Ti | 1.487215  | -0.088088 | -1.965003 |

|    |           |           |           |
|----|-----------|-----------|-----------|
| Ti | 3.562627  | 3.196746  | 1.562241  |
| O  | 5.411927  | 3.422297  | 2.393232  |
| O  | 2.496086  | 1.620142  | -1.861788 |
| O  | 1.984302  | 4.079525  | -2.678075 |
| O  | 3.663403  | 4.062917  | -0.111746 |
| Ti | 3.421062  | 3.232050  | -1.766355 |
| O  | 5.217241  | 2.562381  | -1.925303 |
| O  | 2.252827  | 1.693111  | 1.954145  |
| Ti | -2.727269 | 4.415571  | -1.350707 |
| O  | -2.842931 | 5.762889  | -0.021277 |
| Ti | -2.820090 | 4.602946  | 1.498388  |
| O  | -2.972398 | 3.105281  | 0.077613  |
| O  | -1.053907 | 4.186997  | 1.868983  |
| O  | -1.122745 | 4.157956  | -2.262844 |
| O  | -0.043187 | 1.296839  | -2.709412 |
| Ti | 0.450519  | 3.082145  | -2.080569 |
| O  | 0.551166  | 2.948645  | -0.231521 |
| O  | -0.342277 | 1.200500  | 2.090586  |
| Ti | 0.426192  | 3.025867  | 1.654101  |
| O  | 1.937166  | 4.370760  | 1.893731  |
| Ti | 3.584349  | -2.479998 | 7.254085  |
| O  | 3.815135  | -4.020700 | 6.118621  |
| Ti | 3.636153  | -3.098512 | 4.506243  |
| O  | 3.978626  | -1.350183 | 5.702917  |
| O  | 1.836504  | -2.622807 | 4.395814  |
| O  | 1.856261  | -2.583190 | 7.863818  |
| O  | 1.091367  | 0.009547  | 8.259932  |
| Ti | 0.099252  | -1.892315 | 8.247770  |
| O  | -0.499202 | -1.757377 | 6.282818  |
| O  | 1.224962  | 0.050322  | 3.939470  |
| Ti | 0.188217  | -1.645674 | 4.499713  |
| O  | -1.132179 | -3.005437 | 3.816635  |
| O  | -1.584985 | -0.343082 | 3.866877  |
| O  | -1.776159 | -0.457697 | 8.127183  |
| O  | -1.259403 | -3.277684 | 8.402708  |
| O  | -3.009051 | -3.116825 | 5.644039  |
| Ti | -2.460367 | -2.381090 | 7.296146  |
| O  | -4.171188 | -1.878630 | 7.931092  |
| Ti | -2.878461 | -1.887623 | 4.237644  |
| O  | -4.738172 | -1.546493 | 3.679035  |
| Ti | -5.151131 | 0.187673  | 4.652318  |
| Ti | -4.322450 | -0.054386 | 7.433356  |
| O  | -4.727105 | 2.003323  | 4.234266  |
| Ti | -3.655079 | 3.760470  | 4.401077  |
| O  | -4.697499 | 4.016161  | 5.946895  |
| O  | -4.647761 | 1.866270  | 7.968191  |
| Ti | -3.699391 | 3.671343  | 7.509246  |
| O  | -3.400991 | -0.267334 | 5.635786  |
| O  | -2.889016 | 5.567973  | 3.411754  |
| O  | -2.067229 | 2.741540  | 4.302480  |
| Ti | -0.637683 | 1.523084  | 4.217790  |
| O  | -5.947265 | 0.044003  | 6.297378  |

|    |           |           |           |
|----|-----------|-----------|-----------|
| O  | -0.374774 | 0.945306  | 5.982808  |
| O  | -2.139074 | 2.583258  | 7.699529  |
| Ti | -0.731085 | 1.317843  | 7.771066  |
| O  | -3.411820 | 5.591935  | 8.195006  |
| O  | 5.443254  | -2.395390 | 3.879450  |
| Ti | 7.006020  | 2.963259  | 8.364127  |
| Ti | 7.011467  | 2.790884  | 5.445097  |
| O  | 7.154039  | 0.965627  | 8.558253  |
| Ti | 5.951430  | -0.458377 | 7.970435  |
| O  | 6.572028  | -0.651508 | 6.232342  |
| O  | 6.821514  | 1.328720  | 4.237672  |
| Ti | 5.608050  | -0.476103 | 4.572207  |
| O  | 5.587897  | 2.836575  | 6.816428  |
| O  | 4.955465  | -2.344315 | 8.566228  |
| O  | 4.191844  | 0.243610  | 8.038631  |
| Ti | 2.591311  | 1.325698  | 7.891855  |
| O  | 8.228394  | 3.010890  | 6.916271  |
| O  | 2.379194  | 1.479479  | 6.047674  |
| O  | 4.343903  | 0.842716  | 3.908968  |
| Ti | 2.567043  | 1.569865  | 4.209448  |
| Ti | 4.712675  | 4.703277  | 7.400231  |
| O  | 6.274327  | 4.846524  | 8.591176  |
| O  | 3.537374  | 3.348230  | 3.947262  |
| O  | 3.549341  | 5.953652  | 3.467142  |
| O  | 5.064064  | 5.495230  | 5.782576  |
| Ti | 4.913632  | 4.812850  | 3.983094  |
| O  | 6.822825  | 4.235997  | 4.389563  |
| O  | 3.423570  | 3.232690  | 8.057956  |
| Ti | -1.520786 | 5.975328  | 4.667634  |
| O  | -1.663318 | 7.376185  | 5.969928  |
| Ti | -1.680642 | 6.277924  | 7.505625  |
| O  | -2.182865 | 4.746577  | 6.028879  |
| O  | 0.032261  | 5.641648  | 7.737336  |
| O  | 0.198025  | 5.885698  | 4.046176  |
| O  | 0.813239  | 2.923170  | 3.861985  |
| Ti | 1.879470  | 4.915104  | 3.873286  |
| O  | 1.968452  | 4.597140  | 5.784126  |
| O  | 0.695259  | 2.790839  | 8.059670  |
| Ti | 1.610118  | 4.543720  | 7.588373  |
| O  | 3.196896  | 5.863589  | 8.003236  |
| Ti | 4.497363  | -1.030210 | 13.345463 |
| O  | 4.715638  | -2.554513 | 12.178155 |
| Ti | 4.641799  | -1.639106 | 10.547944 |
| O  | 4.918558  | 0.088385  | 11.776541 |
| O  | 2.868686  | -1.214062 | 10.244457 |
| O  | 2.839537  | -1.120546 | 14.092671 |
| O  | 2.153639  | 1.642342  | 14.414529 |
| Ti | 1.068727  | -0.277862 | 14.266324 |
| O  | 1.191148  | 0.006759  | 12.317732 |
| O  | 2.192775  | 1.718809  | 10.010067 |
| Ti | 1.316136  | -0.069258 | 10.526246 |
| O  | -0.255872 | -1.313469 | 10.150054 |

|    |           |           |           |
|----|-----------|-----------|-----------|
| O  | -0.558927 | 1.330384  | 10.020100 |
| O  | -0.564821 | 1.239518  | 13.716833 |
| O  | -0.569450 | -1.345827 | 14.522662 |
| O  | -2.170088 | -0.827134 | 12.105983 |
| Ti | -1.883361 | -0.184069 | 13.893310 |
| O  | -3.816114 | 0.390060  | 13.846419 |
| Ti | -1.943569 | -0.102516 | 10.406812 |
| O  | -3.762886 | 0.083377  | 9.536072  |
| Ti | -4.388607 | 1.895233  | 10.034494 |
| Ti | -4.056560 | 1.858804  | 12.831978 |
| O  | -4.225151 | 3.787752  | 9.640327  |
| Ti | -2.842018 | 5.131459  | 10.150621 |
| O  | -3.432962 | 5.385559  | 11.888734 |
| O  | -3.725303 | 3.387497  | 13.863324 |
| Ti | -2.492026 | 5.174043  | 13.550331 |
| O  | -2.813699 | 1.802257  | 11.296585 |
| O  | -1.775350 | 6.934298  | 9.544076  |
| O  | -1.224536 | 4.224532  | 10.064324 |
| Ti | 0.399342  | 3.173180  | 10.239608 |
| O  | -5.492372 | 1.842096  | 11.547915 |
| O  | 0.626799  | 3.295451  | 12.066169 |
| O  | -1.250941 | 3.851712  | 14.311227 |
| Ti | 0.423647  | 2.940377  | 13.895426 |
| O  | -2.373305 | 7.068582  | 14.272912 |
| O  | 6.446428  | -0.941274 | 9.954219  |
| Ti | 8.461831  | 4.234098  | 14.193539 |
| Ti | 8.127521  | 4.269056  | 11.395594 |
| O  | 8.302772  | 2.341273  | 14.588196 |
| Ti | 6.918423  | 0.999473  | 14.078261 |
| O  | 7.503340  | 0.743003  | 12.338505 |
| O  | 7.794216  | 2.740426  | 10.364924 |
| Ti | 6.562592  | 0.954016  | 10.676254 |
| O  | 6.886376  | 4.325487  | 12.932628 |
| O  | 5.848853  | -0.802787 | 14.680264 |
| O  | 5.300078  | 1.904317  | 14.165945 |
| Ti | 3.673996  | 2.952604  | 13.986402 |
| O  | 9.564496  | 4.286797  | 12.679034 |
| O  | 3.456094  | 2.825593  | 12.159156 |
| O  | 5.323219  | 2.276287  | 9.908891  |
| Ti | 3.648285  | 3.186426  | 10.329552 |
| Ti | 6.015661  | 6.229971  | 13.820112 |
| O  | 7.835555  | 6.045217  | 14.692279 |
| O  | 4.635470  | 4.887546  | 10.508993 |
| O  | 4.640764  | 7.473295  | 9.703542  |
| O  | 6.241634  | 6.953829  | 12.120573 |
| Ti | 5.954425  | 6.311067  | 10.332761 |
| O  | 7.887176  | 5.736896  | 10.380709 |
| O  | 4.630570  | 4.797195  | 14.206013 |
| Ti | -0.423430 | 7.164487  | 10.880091 |
| O  | -0.640577 | 8.687298  | 12.049642 |
| Ti | -0.569970 | 7.767241  | 13.677350 |
| O  | -0.849335 | 6.043115  | 12.445381 |

|    |           |           |           |
|----|-----------|-----------|-----------|
| O  | 1.201549  | 7.337468  | 13.981353 |
| O  | 1.234355  | 7.253323  | 10.132301 |
| O  | 1.919201  | 4.484451  | 9.811218  |
| Ti | 3.002482  | 6.405597  | 9.959174  |
| O  | 2.878403  | 6.118217  | 11.907608 |
| O  | 1.881031  | 4.406236  | 14.215258 |
| Ti | 2.756301  | 6.195082  | 13.699177 |
| O  | 4.326945  | 7.440939  | 14.074880 |
| Ti | 5.594320  | 0.155084  | 19.559296 |
| O  | 5.737954  | -1.246151 | 18.257314 |
| Ti | 5.754786  | -0.148394 | 16.721285 |
| O  | 6.256804  | 1.383569  | 18.198528 |
| O  | 4.040707  | 0.486498  | 16.491203 |
| O  | 3.875172  | 0.244097  | 20.180317 |
| O  | 3.259390  | 3.203600  | 20.364233 |
| Ti | 2.192252  | 1.212758  | 20.352252 |
| O  | 2.101470  | 1.527915  | 18.441627 |
| O  | 3.377805  | 3.335223  | 16.166878 |
| Ti | 2.461986  | 1.582550  | 16.637151 |
| O  | 0.874017  | 0.264561  | 16.221933 |
| O  | 0.647619  | 2.894469  | 16.166494 |
| O  | 0.533249  | 2.779846  | 20.280150 |
| O  | 0.521749  | 0.175166  | 20.760182 |
| O  | -0.992265 | 0.633341  | 18.443210 |
| Ti | -0.842559 | 1.315213  | 20.242923 |
| O  | -2.751788 | 1.891367  | 19.835285 |
| Ti | -0.641531 | 1.425255  | 16.825025 |
| O  | -2.203191 | 1.282290  | 15.634210 |
| Ti | -2.936576 | 3.164646  | 15.862679 |
| Ti | -2.940722 | 3.336017  | 18.781658 |
| O  | -3.079651 | 5.161320  | 15.668732 |
| Ti | -1.876024 | 6.585915  | 16.256337 |
| O  | -2.501579 | 6.778009  | 17.993238 |
| O  | -2.751459 | 4.797838  | 19.990258 |
| Ti | -1.537594 | 6.603288  | 19.652997 |
| O  | -1.517838 | 3.291114  | 17.409920 |
| O  | -0.883129 | 8.473096  | 15.659298 |
| O  | -0.118791 | 5.880981  | 16.187042 |
| Ti | 1.482542  | 4.800478  | 16.333345 |
| O  | -4.158447 | 3.116495  | 17.310183 |
| O  | 1.696364  | 4.641917  | 18.177213 |
| O  | -0.271296 | 5.286281  | 20.310019 |
| Ti | 1.505106  | 4.557282  | 20.015233 |
| O  | -1.371376 | 8.522714  | 20.345483 |
| O  | 7.486997  | 0.537051  | 16.033484 |
| Ti | 9.224600  | 5.942152  | 19.575844 |
| Ti | 8.396876  | 6.181927  | 16.794726 |
| O  | 8.799862  | 4.126426  | 19.994061 |
| Ti | 7.728675  | 2.369192  | 19.827157 |
| O  | 8.772193  | 2.114630  | 18.281787 |
| O  | 8.722391  | 4.263641  | 16.259236 |
| Ti | 7.774486  | 2.457881  | 16.719126 |

|    |           |           |           |
|----|-----------|-----------|-----------|
| O  | 7.474422  | 6.395781  | 18.591484 |
| O  | 6.961995  | 0.561931  | 20.816087 |
| O  | 6.140289  | 3.387804  | 19.926418 |
| Ti | 4.709492  | 4.604568  | 20.008356 |
| O  | 10.021302 | 6.086895  | 17.930933 |
| O  | 4.448579  | 5.181153  | 18.242582 |
| O  | 6.213647  | 3.545988  | 16.526692 |
| Ti | 4.803850  | 4.808573  | 16.454327 |
| Ti | 6.950219  | 8.015469  | 19.989548 |
| O  | 8.809337  | 7.675904  | 20.548898 |
| O  | 5.846551  | 6.585949  | 16.098118 |
| O  | 5.330644  | 9.405567  | 15.823627 |
| O  | 7.079656  | 9.243980  | 18.582078 |
| Ti | 6.530941  | 8.508579  | 16.930345 |
| O  | 8.242796  | 8.007444  | 16.294022 |
| O  | 5.656407  | 6.471007  | 20.358891 |
| Ti | 0.487718  | 8.612113  | 16.970460 |
| O  | 0.257642  | 10.151693 | 18.107432 |
| Ti | 0.434991  | 9.226462  | 19.718262 |
| O  | 0.090943  | 7.480471  | 18.518736 |
| O  | 2.234396  | 8.749969  | 19.828977 |
| O  | 2.215470  | 8.712491  | 16.359735 |
| O  | 2.980147  | 6.118171  | 15.965955 |
| Ti | 3.972292  | 8.019913  | 15.977290 |
| O  | 4.570218  | 7.884756  | 17.943170 |
| O  | 2.846897  | 6.076983  | 20.285195 |
| Ti | 3.883405  | 7.773661  | 19.726311 |
| O  | 5.203886  | 9.133293  | 20.409617 |
| Ti | 6.802176  | 1.717438  | 25.578445 |
| O  | 6.916572  | 0.368059  | 24.250650 |
| Ti | 6.893506  | 1.526444  | 22.729780 |
| O  | 7.048179  | 3.025447  | 24.147920 |
| O  | 5.126790  | 1.941593  | 22.359645 |
| O  | 5.196802  | 1.974519  | 26.489561 |
| O  | 4.115174  | 4.833936  | 26.935320 |
| Ti | 3.622623  | 3.048246  | 26.306616 |
| O  | 3.520859  | 3.181688  | 24.457413 |
| O  | 4.412761  | 4.927283  | 22.135891 |
| Ti | 3.645059  | 3.100963  | 22.571992 |
| O  | 2.134388  | 1.756837  | 22.332619 |
| O  | 1.818107  | 4.434533  | 22.270856 |
| O  | 1.575685  | 4.510170  | 26.088168 |
| O  | 2.088693  | 2.050343  | 26.904049 |
| O  | 0.408450  | 2.066363  | 24.337773 |
| Ti | 0.652190  | 2.897073  | 25.992305 |
| O  | -1.144915 | 3.566168  | 26.151592 |
| Ti | 0.508532  | 2.931172  | 22.662903 |
| O  | -1.340878 | 2.706276  | 21.832684 |
| Ti | -1.987342 | 4.623046  | 22.004151 |
| Ti | -1.564876 | 4.899393  | 24.901141 |
| O  | -2.048219 | 6.613781  | 21.795928 |
| Ti | -0.794713 | 8.066941  | 22.277742 |

|    |           |           |           |
|----|-----------|-----------|-----------|
| O  | -1.104741 | 8.576276  | 23.992242 |
| O  | -1.351666 | 6.563875  | 25.604735 |
| Ti | -0.132403 | 8.107488  | 25.671636 |
| O  | -0.364318 | 4.715454  | 23.353014 |
| O  | 0.269007  | 10.005384 | 21.633514 |
| O  | 0.918614  | 7.336988  | 22.126823 |
| Ti | 2.578978  | 6.381739  | 22.466648 |
| O  | -2.977519 | 4.590692  | 23.622719 |
| O  | 2.617552  | 6.349083  | 24.345587 |
| O  | 1.098497  | 7.192200  | 26.781166 |
| Ti | 2.584707  | 6.217472  | 26.190375 |
| O  | -0.007866 | 9.830075  | 26.586534 |
| O  | 8.483635  | 2.289910  | 21.777458 |
| Ti | 9.732896  | 7.098118  | 25.320877 |
| Ti | 9.745048  | 7.524661  | 22.513986 |
| O  | 9.730596  | 5.419403  | 26.048585 |
| Ti | 8.596580  | 3.938267  | 25.501364 |
| O  | 9.593670  | 3.892781  | 23.844335 |
| O  | 10.095790 | 5.795842  | 21.543938 |
| Ti | 8.912067  | 4.251195  | 22.159510 |
| O  | 8.382783  | 7.203966  | 23.895605 |
| O  | 8.411755  | 2.207025  | 26.377632 |
| O  | 7.033725  | 4.731368  | 26.321149 |
| Ti | 5.645222  | 5.940681  | 26.154864 |
| O  | 11.006032 | 7.429396  | 23.931073 |
| O  | 5.307494  | 6.057385  | 24.355105 |
| O  | 7.294449  | 5.159965  | 22.256024 |
| Ti | 5.856698  | 6.381709  | 22.577144 |
| Ti | 7.650305  | 9.170463  | 26.379379 |
| O  | 9.412064  | 8.457135  | 26.582708 |
| O  | 6.759175  | 8.194742  | 22.284119 |
| O  | 6.421208  | 10.872995 | 22.433344 |
| O  | 7.972888  | 10.181001 | 24.846014 |
| Ti | 7.797034  | 9.775795  | 23.034634 |
| O  | 9.469024  | 9.447020  | 22.311333 |
| O  | 6.725114  | 7.550237  | 26.378933 |
| Ti | 1.577259  | 10.272165 | 22.960113 |
| O  | 1.320748  | 11.620863 | 24.314065 |
| Ti | 1.529016  | 10.480095 | 25.785437 |
| O  | 1.532689  | 8.965006  | 24.472656 |
| O  | 3.158550  | 10.361390 | 26.591952 |
| O  | 3.227366  | 10.578710 | 22.280622 |
| O  | 4.029771  | 7.690702  | 22.166725 |
| Ti | 4.917696  | 9.640077  | 22.358193 |
| O  | 4.868214  | 9.248545  | 24.334217 |
| O  | 4.072944  | 7.449379  | 26.758703 |
| Ti | 4.653225  | 9.198846  | 26.153865 |
| O  | 6.119217  | 10.047619 | 27.052622 |

48c-like 3-D (0,0,4)-mer

|    |          |           |           |
|----|----------|-----------|-----------|
| Ti | 2.501349 | -4.130674 | 1.239828  |
| O  | 2.742194 | -5.471344 | -0.122639 |



|    |           |           |           |
|----|-----------|-----------|-----------|
| Ti | 2.533222  | -4.325797 | -1.590919 |
| O  | 2.548874  | -2.816462 | -0.264463 |
| O  | 0.909829  | -4.181457 | -2.399098 |
| O  | 0.851389  | -4.454604 | 1.919239  |
| O  | 0.022186  | -1.564162 | 2.027751  |
| Ti | -0.836869 | -3.523538 | 1.845599  |
| O  | -0.796187 | -3.130958 | -0.129949 |
| O  | 0.001510  | -1.295827 | -2.562250 |
| Ti | -0.607436 | -3.042305 | -1.952285 |
| O  | -2.062243 | -3.932222 | -2.852478 |
| O  | -2.604812 | -1.453173 | -2.117000 |
| O  | -2.699853 | -2.088716 | 1.912015  |
| O  | -2.334502 | -4.770793 | 1.784248  |
| O  | -3.906614 | -4.061282 | -0.629125 |
| Ti | -3.717759 | -3.685578 | 1.187282  |
| O  | -5.389739 | -3.313480 | 1.885946  |
| Ti | -3.576832 | -3.049854 | -2.160534 |
| O  | -5.317131 | -2.303181 | -2.380467 |
| Ti | -5.644279 | -0.949366 | -1.113312 |
| Ti | -5.650241 | -1.385595 | 1.688234  |
| O  | -5.652523 | 0.728403  | -1.842472 |
| Ti | -4.514766 | 2.200964  | -1.279268 |
| O  | -5.517027 | 2.251502  | 0.373466  |
| O  | -6.032006 | 0.331323  | 2.668955  |
| Ti | -4.846850 | 1.879988  | 2.062041  |
| O  | -4.294814 | -1.021915 | 0.310107  |
| O  | -4.329772 | 3.932025  | -2.155649 |
| O  | -2.963034 | 1.396473  | -2.125402 |
| Ti | -1.565403 | 0.204439  | -1.945469 |
| O  | -6.915096 | -1.302047 | 0.269826  |
| O  | -1.244394 | 0.098619  | -0.143790 |
| O  | -3.233774 | 0.967748  | 1.959254  |
| Ti | -1.807670 | -0.268209 | 1.621494  |
| O  | -4.409840 | 3.841053  | 2.445581  |
| O  | 4.082338  | -3.693363 | -2.382751 |
| Ti | 6.032869  | 1.495588  | 2.220785  |
| Ti | 5.642345  | 1.223472  | -0.685214 |
| O  | 6.120563  | -0.500917 | 2.421790  |
| Ti | 4.869241  | -1.950943 | 1.936608  |
| O  | 5.189711  | -2.456232 | 0.223727  |
| O  | 5.443187  | -0.442525 | -1.396664 |
| Ti | 4.220037  | -1.977407 | -1.457171 |
| O  | 4.425268  | 1.402332  | 0.848160  |
| O  | 3.808604  | -3.887646 | 2.578063  |
| O  | 3.142331  | -1.239626 | 2.079013  |
| Ti | 1.488406  | -0.270131 | 1.735516  |
| O  | 7.038357  | 1.531076  | 0.608757  |
| O  | 1.451691  | -0.200015 | -0.143415 |
| O  | 2.990174  | -1.056597 | -2.565782 |
| Ti | 1.497800  | -0.083232 | -1.989310 |
| Ti | 3.555618  | 3.187920  | 1.536743  |
| O  | 5.394515  | 3.424549  | 2.373927  |

|    |           |           |           |
|----|-----------|-----------|-----------|
| O  | 2.500271  | 1.626284  | -1.898777 |
| O  | 1.992155  | 4.088453  | -2.697839 |
| O  | 3.672099  | 4.060565  | -0.133697 |
| Ti | 3.429737  | 3.233693  | -1.790120 |
| O  | 5.224378  | 2.554756  | -1.939094 |
| O  | 2.243808  | 1.679844  | 1.933619  |
| Ti | -2.722678 | 4.425132  | -1.353770 |
| O  | -2.839324 | 5.765556  | -0.019003 |
| Ti | -2.815062 | 4.600940  | 1.498465  |
| O  | -2.963997 | 3.107653  | 0.067501  |
| O  | -1.049348 | 4.184598  | 1.869069  |
| O  | -1.120081 | 4.175022  | -2.272426 |
| O  | -0.039383 | 1.314684  | -2.723310 |
| Ti | 0.455232  | 3.098499  | -2.096862 |
| O  | 0.553048  | 2.972141  | -0.248552 |
| O  | -0.359044 | 1.189978  | 2.073180  |
| Ti | 0.416522  | 3.006579  | 1.636462  |
| O  | 1.934720  | 4.351280  | 1.881646  |
| Ti | 3.592360  | -2.449792 | 7.243900  |
| O  | 3.832995  | -4.002273 | 6.117549  |
| Ti | 3.638112  | -3.106639 | 4.495709  |
| O  | 3.962994  | -1.334901 | 5.671706  |
| O  | 1.834243  | -2.642290 | 4.374558  |
| O  | 1.860971  | -2.578155 | 7.845312  |
| O  | 1.067375  | -0.018272 | 8.229262  |
| Ti | 0.081435  | -1.928385 | 8.219613  |
| O  | -0.519387 | -1.777144 | 6.259571  |
| O  | 1.225321  | 0.033629  | 3.917096  |
| Ti | 0.190023  | -1.654599 | 4.483690  |
| O  | -1.134671 | -3.009202 | 3.790696  |
| O  | -1.591358 | -0.355971 | 3.840968  |
| O  | -1.811515 | -0.487658 | 8.095263  |
| O  | -1.270747 | -3.321305 | 8.359734  |
| O  | -3.023749 | -3.143990 | 5.613021  |
| Ti | -2.484361 | -2.415827 | 7.270594  |
| O  | -4.196084 | -1.918117 | 7.902622  |
| Ti | -2.879819 | -1.898648 | 4.220013  |
| O  | -4.735005 | -1.553833 | 3.653037  |
| Ti | -5.154844 | 0.176437  | 4.633103  |
| Ti | -4.331137 | -0.084996 | 7.416796  |
| O  | -4.729964 | 1.993378  | 4.222645  |
| Ti | -3.660429 | 3.756320  | 4.398254  |
| O  | -4.714067 | 3.989425  | 5.940387  |
| O  | -4.675101 | 1.834171  | 7.952696  |
| Ti | -3.714925 | 3.636321  | 7.501278  |
| O  | -3.403907 | -0.286577 | 5.618336  |
| O  | -2.886486 | 5.564865  | 3.411893  |
| O  | -2.075400 | 2.729895  | 4.295760  |
| Ti | -0.651584 | 1.508015  | 4.194654  |
| O  | -5.954821 | 0.018868  | 6.273517  |
| O  | -0.367418 | 0.925524  | 5.957557  |
| O  | -2.159581 | 2.547738  | 7.684284  |

|    |           |           |           |
|----|-----------|-----------|-----------|
| Ti | -0.753703 | 1.276067  | 7.745965  |
| O  | -3.442671 | 5.562873  | 8.180301  |
| O  | 5.441555  | -2.403510 | 3.873937  |
| Ti | 7.049170  | 3.009926  | 8.384361  |
| Ti | 7.007186  | 2.800739  | 5.447011  |
| O  | 7.180532  | 1.019661  | 8.559851  |
| Ti | 5.967896  | -0.405994 | 7.963427  |
| O  | 6.563850  | -0.624020 | 6.220428  |
| O  | 6.797003  | 1.335067  | 4.245128  |
| Ti | 5.593606  | -0.477466 | 4.559686  |
| O  | 5.601722  | 2.846201  | 6.830206  |
| O  | 4.968995  | -2.295191 | 8.547187  |
| O  | 4.200496  | 0.266743  | 8.036873  |
| Ti | 2.568471  | 1.304383  | 7.879018  |
| O  | 8.240409  | 3.044850  | 6.907979  |
| O  | 2.405759  | 1.428327  | 6.028138  |
| O  | 4.346849  | 0.845804  | 3.834550  |
| Ti | 2.565101  | 1.556557  | 4.189086  |
| Ti | 4.684475  | 4.680896  | 7.361459  |
| O  | 6.287295  | 4.903061  | 8.525505  |
| O  | 3.532162  | 3.337710  | 3.953530  |
| O  | 3.519898  | 5.942727  | 3.458120  |
| O  | 5.031836  | 5.501469  | 5.762219  |
| Ti | 4.893502  | 4.806729  | 3.964628  |
| O  | 6.803456  | 4.237729  | 4.385828  |
| O  | 3.407354  | 3.207509  | 8.041760  |
| Ti | -1.524213 | 5.966782  | 4.674492  |
| O  | -1.681329 | 7.365962  | 5.976135  |
| Ti | -1.710918 | 6.261509  | 7.508676  |
| O  | -2.200322 | 4.729905  | 6.020042  |
| O  | -0.004360 | 5.606141  | 7.729261  |
| O  | 0.192439  | 5.878176  | 4.047234  |
| O  | 0.809633  | 2.901394  | 3.842982  |
| Ti | 1.861438  | 4.891324  | 3.862382  |
| O  | 1.934696  | 4.541909  | 5.770716  |
| O  | 0.674137  | 2.752373  | 8.042600  |
| Ti | 1.574198  | 4.507871  | 7.574235  |
| O  | 3.154640  | 5.816078  | 7.977195  |
| Ti | 4.505748  | -0.927816 | 13.317981 |
| O  | 4.743299  | -2.463163 | 12.154171 |
| Ti | 4.645028  | -1.572721 | 10.522407 |
| O  | 4.902657  | 0.175118  | 11.709903 |
| O  | 2.856815  | -1.206360 | 10.206590 |
| O  | 2.831901  | -1.082067 | 14.021762 |
| O  | 2.087825  | 1.623984  | 14.367549 |
| Ti | 1.025074  | -0.304566 | 14.229718 |
| O  | 1.129732  | -0.052556 | 12.275183 |
| O  | 2.167557  | 1.701388  | 9.985066  |
| Ti | 1.286207  | -0.089057 | 10.487784 |
| O  | -0.295638 | -1.338031 | 10.109250 |
| O  | -0.591820 | 1.303354  | 9.991962  |
| O  | -0.607309 | 1.218543  | 13.685220 |

|    |           |           |           |
|----|-----------|-----------|-----------|
| O  | -0.619389 | -1.367530 | 14.490947 |
| O  | -2.212720 | -0.855462 | 12.084615 |
| Ti | -1.928318 | -0.198078 | 13.871053 |
| O  | -3.859862 | 0.387543  | 13.825979 |
| Ti | -1.977340 | -0.131927 | 10.389545 |
| O  | -3.797823 | 0.046529  | 9.519744  |
| Ti | -4.420827 | 1.863570  | 10.015643 |
| Ti | -4.084399 | 1.858184  | 12.810821 |
| O  | -4.249266 | 3.757993  | 9.627252  |
| Ti | -2.883395 | 5.117489  | 10.141200 |
| O  | -3.467497 | 5.406138  | 11.873635 |
| O  | -3.754139 | 3.400638  | 13.823319 |
| Ti | -2.517349 | 5.195197  | 13.534818 |
| O  | -2.844932 | 1.774475  | 11.272363 |
| O  | -1.819297 | 6.930567  | 9.534214  |
| O  | -1.269887 | 4.206662  | 10.057439 |
| Ti | 0.354489  | 3.148493  | 10.223125 |
| O  | -5.522703 | 1.828117  | 11.529135 |
| O  | 0.579630  | 3.279700  | 12.041444 |
| O  | -1.291594 | 3.845209  | 14.283028 |
| Ti | 0.382743  | 2.918873  | 13.879140 |
| O  | -2.397651 | 7.099765  | 14.266495 |
| O  | 6.463226  | -0.878253 | 9.939560  |
| Ti | 8.041708  | 4.491828  | 14.468155 |
| Ti | 8.026038  | 4.324207  | 11.551654 |
| O  | 8.177603  | 2.482804  | 14.638360 |
| Ti | 6.957077  | 1.061843  | 14.048576 |
| O  | 7.549242  | 0.816755  | 12.313903 |
| O  | 7.778652  | 2.826134  | 10.413488 |
| Ti | 6.567407  | 1.018210  | 10.671279 |
| O  | 6.616681  | 4.380759  | 12.933845 |
| O  | 5.929215  | -0.805647 | 14.602067 |
| O  | 5.220682  | 1.792329  | 14.094252 |
| Ti | 3.636542  | 2.913769  | 13.939864 |
| O  | 9.256645  | 4.541621  | 13.012859 |
| O  | 3.353351  | 2.826219  | 12.114528 |
| O  | 5.336996  | 2.354082  | 9.891681  |
| Ti | 3.617203  | 3.185140  | 10.300524 |
| Ti | 5.776649  | 6.273649  | 13.475974 |
| O  | 7.334273  | 6.387518  | 14.681251 |
| O  | 4.602598  | 4.906574  | 10.482397 |
| O  | 4.575899  | 7.449872  | 9.548396  |
| O  | 6.163605  | 7.114608  | 11.896942 |
| Ti | 5.914769  | 6.313337  | 10.146197 |
| O  | 7.847069  | 5.731172  | 10.445221 |
| O  | 4.452976  | 4.808709  | 14.104734 |
| Ti | -0.477210 | 7.180643  | 10.875969 |
| O  | -0.710554 | 8.715431  | 12.030496 |
| Ti | -0.616982 | 7.821472  | 13.674470 |
| O  | -0.885774 | 6.068706  | 12.442172 |
| O  | 1.151553  | 7.372286  | 13.952912 |
| O  | 1.181169  | 7.236568  | 10.126622 |

|    |           |           |           |
|----|-----------|-----------|-----------|
| O  | 1.876822  | 4.471875  | 9.794639  |
| Ti | 2.946749  | 6.384993  | 9.938815  |
| O  | 2.893304  | 6.192843  | 11.893865 |
| O  | 1.766369  | 4.418381  | 14.195287 |
| Ti | 2.653181  | 6.181312  | 13.696263 |
| O  | 4.274987  | 7.445581  | 14.091173 |
| Ti | 5.568908  | 0.483996  | 19.406887 |
| O  | 5.802620  | -1.051544 | 18.253609 |
| Ti | 5.706210  | -0.160322 | 16.608500 |
| O  | 5.973891  | 1.594318  | 17.837936 |
| O  | 3.936020  | 0.283721  | 16.329803 |
| O  | 3.910680  | 0.427237  | 20.156286 |
| O  | 3.214206  | 3.188055  | 20.487917 |
| Ti | 2.142941  | 1.275568  | 20.342950 |
| O  | 2.195769  | 1.465413  | 18.387907 |
| O  | 3.322725  | 3.239699  | 16.087218 |
| Ti | 2.435889  | 1.476401  | 16.585580 |
| O  | 0.813028  | 0.213572  | 16.190669 |
| O  | 0.635857  | 2.849923  | 16.177309 |
| O  | 0.487567  | 2.753937  | 19.799408 |
| O  | 0.513750  | 0.210810  | 20.733340 |
| O  | -1.075078 | 0.545011  | 18.385272 |
| Ti | -0.824958 | 1.347604  | 20.135797 |
| O  | -2.757363 | 1.929928  | 19.836066 |
| Ti | -0.688259 | 1.385458  | 16.806316 |
| O  | -2.245747 | 1.272855  | 15.600867 |
| Ti | -2.952955 | 3.168686  | 15.814033 |
| Ti | -2.936232 | 3.336413  | 18.730517 |
| O  | -3.087654 | 5.177526  | 15.644352 |
| Ti | -1.866207 | 6.598237  | 16.234700 |
| O  | -2.458828 | 6.844164  | 17.968730 |
| O  | -2.688260 | 4.834156  | 19.868801 |
| Ti | -1.476711 | 6.642198  | 19.611016 |
| O  | -1.527189 | 3.279338  | 17.347864 |
| O  | -0.839100 | 8.466126  | 15.680526 |
| O  | -0.130506 | 5.866208  | 16.190133 |
| Ti | 1.453301  | 4.744182  | 16.342618 |
| O  | -4.167431 | 3.119625  | 17.269844 |
| O  | 1.740347  | 4.831188  | 18.167414 |
| O  | -0.245987 | 5.306241  | 20.388687 |
| Ti | 1.473776  | 4.474822  | 19.981387 |
| O  | -1.371700 | 8.538620  | 20.342682 |
| O  | 7.487746  | 0.560719  | 16.016934 |
| Ti | 9.512026  | 5.798293  | 20.268186 |
| Ti | 9.173431  | 5.802354  | 17.472881 |
| O  | 9.344671  | 3.903900  | 20.657240 |
| Ti | 7.977426  | 2.545955  | 20.142722 |
| O  | 8.557122  | 2.255798  | 18.409334 |
| O  | 8.842524  | 4.259722  | 16.460443 |
| Ti | 7.606396  | 2.465627  | 16.747826 |
| O  | 7.935545  | 5.885419  | 19.012756 |
| O  | 6.911559  | 0.733775  | 20.750996 |

|    |           |           |           |
|----|-----------|-----------|-----------|
| O  | 6.363144  | 3.455820  | 20.226978 |
| Ti | 4.736837  | 4.511168  | 20.059924 |
| O  | 10.612750 | 5.833538  | 18.753610 |
| O  | 4.513041  | 4.378551  | 18.241657 |
| O  | 6.380854  | 3.815577  | 15.997655 |
| Ti | 4.705758  | 4.739754  | 16.403674 |
| Ti | 7.068182  | 7.792526  | 19.893936 |
| O  | 8.888960  | 7.614679  | 20.764114 |
| O  | 5.695590  | 6.440516  | 16.597444 |
| O  | 5.708284  | 9.026840  | 15.791802 |
| O  | 7.302419  | 8.514153  | 18.198025 |
| Ti | 7.017021  | 7.856779  | 16.411370 |
| O  | 8.948736  | 7.271195  | 16.458922 |
| O  | 5.682052  | 6.357137  | 20.290464 |
| Ti | 0.585084  | 8.588249  | 16.964314 |
| O  | 0.348526  | 10.123419 | 18.128224 |
| Ti | 0.446545  | 9.232329  | 19.759807 |
| O  | 0.188151  | 7.485054  | 18.571982 |
| O  | 2.234640  | 8.866863  | 20.076350 |
| O  | 2.258021  | 8.742736  | 16.258459 |
| O  | 3.001315  | 6.034617  | 15.914499 |
| Ti | 4.063944  | 7.963407  | 16.052268 |
| O  | 3.958798  | 7.711084  | 18.006900 |
| O  | 2.923337  | 5.958408  | 20.297420 |
| Ti | 3.804622  | 7.748828  | 19.794441 |
| O  | 5.385859  | 8.998385  | 20.172848 |
| Ti | 6.616298  | 1.697136  | 25.608733 |
| O  | 6.774325  | 0.297679  | 24.307455 |
| Ti | 6.803548  | 1.401420  | 22.774553 |
| O  | 7.292239  | 2.933455  | 24.262828 |
| O  | 5.096584  | 2.055916  | 22.554639 |
| O  | 4.899230  | 1.785024  | 26.234918 |
| O  | 4.280180  | 4.758105  | 26.439355 |
| Ti | 3.228345  | 2.768743  | 26.419510 |
| O  | 3.153772  | 3.117083  | 24.511389 |
| O  | 4.416323  | 4.907436  | 22.240062 |
| Ti | 3.516008  | 3.151775  | 22.707832 |
| O  | 1.935628  | 1.843984  | 22.304656 |
| O  | 1.683135  | 4.452220  | 22.240122 |
| O  | 1.556807  | 4.322187  | 26.328453 |
| O  | 1.569755  | 1.717612  | 26.824463 |
| O  | 0.057921  | 2.157862  | 24.520159 |
| Ti | 0.196011  | 2.853291  | 26.317524 |
| O  | -1.713699 | 3.421821  | 25.898447 |
| Ti | 0.405844  | 2.979077  | 22.920799 |
| O  | -1.196919 | 2.757052  | 21.756615 |
| Ti | -1.958845 | 4.650508  | 21.897720 |
| Ti | -1.917076 | 4.860448  | 24.834834 |
| O  | -2.089283 | 6.640265  | 21.722332 |
| Ti | -0.876428 | 8.066278  | 22.318998 |
| O  | -1.473125 | 8.284840  | 24.061306 |
| O  | -1.706363 | 6.325323  | 26.036610 |

|    |           |           |           |
|----|-----------|-----------|-----------|
| Ti | -0.503400 | 8.138699  | 25.722182 |
| O  | -0.511329 | 4.814039  | 23.451707 |
| O  | 0.122553  | 9.955720  | 21.735143 |
| O  | 0.890067  | 7.391891  | 22.244757 |
| Ti | 2.522472  | 6.355403  | 22.403398 |
| O  | -3.149943 | 4.615352  | 23.373339 |
| O  | 2.684468  | 6.231480  | 24.254453 |
| O  | 0.743557  | 6.815347  | 26.447178 |
| Ti | 2.524349  | 6.103487  | 26.093206 |
| O  | -0.351434 | 10.064910 | 26.408255 |
| O  | 8.535814  | 2.099153  | 22.103735 |
| Ti | 10.246242 | 7.486430  | 25.651413 |
| Ti | 9.422821  | 7.746408  | 22.867559 |
| O  | 9.822227  | 5.669507  | 26.062539 |
| Ti | 8.752780  | 3.906918  | 25.886794 |
| O  | 9.806483  | 3.673121  | 24.344597 |
| O  | 9.767586  | 5.827534  | 22.330772 |
| Ti | 8.807908  | 4.025710  | 22.782931 |
| O  | 8.495233  | 7.946948  | 24.665702 |
| O  | 7.978454  | 2.098579  | 26.871555 |
| O  | 7.166819  | 4.931734  | 25.989186 |
| Ti | 5.741133  | 6.151670  | 26.087828 |
| O  | 11.046407 | 7.644447  | 24.011079 |
| O  | 5.457259  | 6.732362  | 24.324538 |
| O  | 7.252392  | 5.114062  | 22.597888 |
| Ti | 5.844587  | 6.383755  | 22.536153 |
| Ti | 7.969281  | 9.558864  | 26.064001 |
| O  | 9.825031  | 9.215733  | 26.631518 |
| O  | 6.900919  | 8.148440  | 22.186953 |
| O  | 6.360168  | 10.981879 | 21.923494 |
| O  | 8.113034  | 10.803850 | 24.670503 |
| Ti | 7.573412  | 10.076328 | 23.012964 |
| O  | 9.285571  | 9.579077  | 22.381308 |
| O  | 6.680493  | 8.015705  | 26.440713 |
| Ti | 1.498096  | 10.113165 | 23.038763 |
| O  | 1.257440  | 11.665063 | 24.165566 |
| Ti | 1.451860  | 10.768304 | 25.787115 |
| O  | 1.126682  | 8.997077  | 24.610296 |
| O  | 3.255401  | 10.302761 | 25.908285 |
| O  | 3.229567  | 10.240269 | 22.437149 |
| O  | 4.022577  | 7.678605  | 22.053509 |
| Ti | 5.008321  | 9.588750  | 22.062480 |
| O  | 5.608518  | 9.436385  | 24.023174 |
| O  | 3.864243  | 7.626241  | 26.365292 |
| Ti | 4.899416  | 9.314782  | 25.798849 |
| O  | 6.223928  | 10.669215 | 26.492373 |
| Ti | 7.814150  | 3.237992  | 31.638177 |
| O  | 7.931528  | 1.897376  | 30.303896 |
| Ti | 7.906813  | 3.061823  | 28.786152 |
| O  | 8.054749  | 4.555229  | 30.217200 |
| O  | 6.140795  | 3.476987  | 28.415535 |
| O  | 6.210507  | 3.487285  | 32.555489 |

|    |           |           |           |
|----|-----------|-----------|-----------|
| O  | 5.129068  | 6.345912  | 33.005193 |
| Ti | 4.634170  | 4.561870  | 32.379485 |
| O  | 4.536150  | 4.687522  | 30.531213 |
| O  | 5.447848  | 6.469636  | 28.209293 |
| Ti | 4.672747  | 4.652556  | 28.646281 |
| O  | 3.154831  | 3.308364  | 28.400480 |
| O  | 2.845808  | 5.979578  | 28.348778 |
| O  | 2.588689  | 6.034450  | 32.181211 |
| O  | 3.097252  | 3.572227  | 32.980606 |
| O  | 1.417275  | 3.599179  | 30.415842 |
| Ti | 1.659600  | 4.426654  | 32.072451 |
| O  | -0.135607 | 5.105311  | 32.220521 |
| Ti | 1.533879  | 4.471861  | 28.745514 |
| O  | -0.305639 | 4.235825  | 27.907907 |
| Ti | -0.942598 | 6.165435  | 28.060833 |
| Ti | -0.552752 | 6.437203  | 30.967257 |
| O  | -1.030476 | 8.161804  | 27.859819 |
| Ti | 0.220241  | 9.612521  | 28.345599 |
| O  | -0.100827 | 10.117588 | 30.058476 |
| O  | -0.353139 | 8.102593  | 31.677867 |
| Ti | 0.869654  | 9.638541  | 31.738797 |
| O  | 0.664572  | 6.257819  | 29.433621 |
| O  | 1.281675  | 11.548737 | 27.705207 |
| O  | 1.946746  | 8.899766  | 28.203370 |
| Ti | 3.599880  | 7.929882  | 28.546944 |
| O  | -1.948561 | 6.130141  | 29.672964 |
| O  | 3.637855  | 7.860078  | 30.425937 |
| O  | 2.099065  | 8.717071  | 32.848139 |
| Ti | 3.591052  | 7.743560  | 32.272034 |
| O  | 1.007846  | 11.354171 | 32.665043 |
| O  | 9.501634  | 3.822532  | 27.839862 |
| Ti | 10.736378 | 8.614325  | 31.398319 |
| Ti | 10.743096 | 9.049056  | 28.596434 |
| O  | 10.742918 | 6.936024  | 32.126053 |
| Ti | 9.605161  | 5.463061  | 31.564589 |
| O  | 10.607077 | 5.412762  | 29.911562 |
| O  | 11.123359 | 7.332136  | 27.616221 |
| Ti | 9.937943  | 5.783594  | 28.222971 |
| O  | 9.387486  | 8.689767  | 29.974774 |
| O  | 9.420678  | 3.732015  | 32.440846 |
| O  | 8.054106  | 6.268094  | 32.410309 |
| Ti | 6.654190  | 7.457125  | 32.228370 |
| O  | 12.007730 | 8.965840  | 30.015181 |
| O  | 6.334753  | 7.559799  | 30.426586 |
| O  | 8.324730  | 6.695924  | 28.325358 |
| Ti | 6.894647  | 7.927783  | 28.660675 |
| Ti | 8.666082  | 10.712858 | 32.444472 |
| O  | 10.406032 | 9.965899  | 32.667534 |
| O  | 7.788395  | 9.747811  | 28.370396 |
| O  | 7.424770  | 12.429514 | 28.500109 |
| O  | 8.997095  | 11.723478 | 30.913580 |
| Ti | 8.807674  | 11.343327 | 29.097477 |



|    |           |           |           |
|----|-----------|-----------|-----------|
| O  | 10.479870 | 10.976049 | 28.396960 |
| O  | 7.691431  | 9.117292  | 32.397648 |
| Ti | 2.589258  | 11.792404 | 29.042952 |
| O  | 2.349164  | 13.132378 | 30.405923 |
| Ti | 2.557638  | 11.985946 | 31.873660 |
| O  | 2.540879  | 10.477307 | 30.546276 |
| O  | 4.180731  | 11.840208 | 32.681882 |
| O  | 4.238938  | 12.115708 | 28.362960 |
| O  | 5.066242  | 9.224425  | 28.254988 |
| Ti | 5.926578  | 11.183772 | 28.437386 |
| O  | 5.885487  | 10.790861 | 30.412806 |
| O  | 5.087177  | 8.955587  | 32.846219 |
| Ti | 5.698326  | 10.701614 | 32.235424 |
| O  | 7.152015  | 11.594904 | 33.136076 |

48c-like 3-D (1,0,0)-mer

|    |           |           |           |
|----|-----------|-----------|-----------|
| Ti | -1.516643 | 4.850339  | 1.732664  |
| O  | -1.867114 | 5.153141  | -0.081815 |
| O  | -3.359572 | 4.612954  | -2.412950 |
| Ti | -1.534279 | 4.743502  | -1.877129 |
| O  | -0.094073 | 5.937278  | -2.263599 |
| O  | -0.037993 | 6.175625  | 2.058020  |
| O  | -0.837674 | 3.133148  | 1.857046  |
| Ti | 0.312733  | 1.611850  | 1.671157  |
| O  | 0.264480  | 1.450436  | -0.217004 |
| O  | -0.686311 | 3.151294  | -2.386782 |
| Ti | 0.284574  | 1.559081  | -2.063581 |
| O  | 1.166293  | -0.369979 | -2.652249 |
| O  | 1.145651  | -0.513833 | 2.109581  |
| Ti | 1.794604  | 5.903182  | 1.388492  |
| O  | 2.096744  | 6.974228  | -0.137279 |
| Ti | 1.523416  | 5.624437  | -1.377359 |
| O  | 1.204317  | 4.507503  | 0.118742  |
| O  | 2.885919  | 4.836500  | -2.373766 |
| O  | 3.395438  | 5.001542  | 1.961452  |
| O  | 2.236221  | 2.174132  | 2.015510  |
| Ti | 3.923254  | 3.217399  | 1.690777  |
| O  | 4.060659  | 3.055374  | -0.199692 |
| O  | 2.204995  | 2.011760  | -2.504686 |
| Ti | 3.699097  | 3.159197  | -2.044176 |
| O  | 5.449403  | 3.196186  | -2.874225 |
| O  | 4.644158  | 0.785012  | -2.135823 |
| O  | 4.788577  | 1.016386  | 1.995801  |
| O  | 5.989993  | 3.251545  | 2.119966  |
| O  | 7.000603  | 2.229611  | -0.446349 |
| Ti | 6.582924  | 1.539723  | 1.261316  |
| O  | 7.971448  | 0.549848  | 2.059149  |
| Ti | 6.288284  | 1.709715  | -2.092323 |
| O  | 7.411401  | 0.199552  | -2.476633 |
| Ti | 7.096186  | -1.223743 | -1.307903 |
| Ti | 7.700541  | -1.300554 | 1.506501  |
| O  | 6.213698  | -2.639238 | -2.079442 |

|    |           |           |           |
|----|-----------|-----------|-----------|
| Ti | 4.466301  | -3.423347 | -1.737081 |
| O  | 4.921097  | -4.136147 | -0.076897 |
| O  | 6.620215  | -2.850418 | 1.965678  |
| Ti | 4.703700  | -3.471454 | 1.661479  |
| O  | 6.242052  | -0.460068 | 0.285678  |
| O  | 3.198770  | -4.661064 | -2.412745 |
| O  | 3.527447  | -1.848396 | -1.927551 |
| Ti | 2.907773  | -0.047954 | -1.829872 |
| O  | 8.528850  | -1.746456 | -0.111932 |
| O  | 2.699293  | 0.286491  | -0.046164 |
| O  | 3.802682  | -1.854484 | 1.574213  |
| Ti | 3.092182  | -0.105171 | 1.766688  |
| Ti | -7.365887 | 1.168665  | 1.265565  |
| Ti | -7.121656 | 1.402268  | -1.521135 |
| O  | -6.703867 | 2.493213  | 2.481386  |
| Ti | -4.778917 | 3.218615  | 1.904328  |
| O  | -4.920140 | 3.626175  | 0.081148  |
| O  | -6.368833 | 2.896622  | -2.310911 |
| Ti | -4.572297 | 3.329146  | -1.764354 |
| O  | -5.999340 | 0.832372  | -0.038168 |
| O  | -3.450030 | 4.606751  | 2.265307  |
| O  | -3.953637 | 1.601097  | 2.148670  |
| Ti | -3.307243 | -0.164001 | 1.727080  |
| O  | -8.428405 | 1.798393  | -0.169526 |
| O  | -2.672211 | 0.074133  | -0.038138 |
| O  | -3.696815 | 1.776301  | -2.249101 |
| Ti | -2.945917 | 0.079152  | -1.848211 |
| Ti | -6.780279 | -1.857231 | 1.241864  |
| O  | -7.977464 | -0.498830 | 1.827743  |
| O  | -4.663781 | -0.878195 | -2.000800 |
| O  | -5.576482 | -3.211461 | -2.725961 |
| O  | -7.261057 | -2.178391 | -0.538557 |
| Ti | -6.383764 | -1.656988 | -2.097366 |
| O  | -7.390104 | -0.095356 | -2.602143 |
| O  | -5.010893 | -1.104917 | 1.497291  |
| Ti | -1.622858 | -5.484704 | -1.310809 |
| O  | -2.124503 | -6.736030 | 0.037616  |
| Ti | -1.891670 | -5.509855 | 1.466037  |
| O  | -1.269743 | -4.243319 | 0.144395  |
| O  | -3.580109 | -5.032686 | 2.107279  |
| O  | -2.981632 | -4.753469 | -2.307824 |
| O  | -2.283178 | -1.970831 | -2.351116 |
| Ti | -3.834234 | -3.094951 | -1.830923 |
| O  | -4.103687 | -3.126397 | -0.016967 |
| O  | -2.461983 | -2.165197 | 2.101967  |
| Ti | -4.353710 | -3.316038 | 1.963118  |
| O  | -6.312129 | -3.449586 | 2.035130  |
| O  | -1.299070 | 0.334766  | 2.151496  |
| O  | -1.190278 | 0.348740  | -2.688259 |
| Ti | 1.402532  | -4.745372 | -1.823872 |
| O  | 1.560763  | -5.114633 | 0.020516  |
| O  | 3.268727  | -4.722501 | 2.183120  |

|    |           |           |           |
|----|-----------|-----------|-----------|
| Ti | 1.325215  | -4.895094 | 1.873626  |
| O  | -0.346686 | -5.934728 | 2.517819  |
| O  | -0.037782 | -5.928227 | -2.202837 |
| O  | 0.586516  | -3.164197 | -2.430125 |
| Ti | -0.342435 | -1.567979 | -2.039942 |
| O  | -0.283329 | -1.501391 | -0.183969 |
| O  | 0.571792  | -3.227253 | 2.134490  |
| Ti | -0.507769 | -1.703333 | 1.678789  |
| Ti | 0.231094  | 5.474324  | 7.841009  |
| O  | 0.071678  | 5.846797  | 5.996120  |
| O  | -1.635769 | 5.451580  | 3.833547  |
| Ti | 0.308015  | 5.624456  | 4.142585  |
| O  | 1.979944  | 6.663986  | 3.498947  |
| O  | 1.669666  | 6.657881  | 8.220638  |
| O  | 1.044864  | 3.893116  | 8.445844  |
| Ti | 1.974058  | 2.298041  | 8.056696  |
| O  | 1.912102  | 2.230323  | 6.200248  |
| O  | 1.060645  | 3.956674  | 3.882031  |
| Ti | 2.138827  | 2.430764  | 4.336813  |
| O  | 2.930144  | 0.392942  | 3.864495  |
| O  | 2.820841  | 0.379111  | 8.703968  |
| Ti | 3.255150  | 6.214803  | 7.328604  |
| O  | 3.757179  | 7.466490  | 5.980210  |
| Ti | 3.524063  | 6.240293  | 4.552056  |
| O  | 2.901303  | 4.974295  | 5.873310  |
| O  | 5.211084  | 5.761848  | 3.909218  |
| O  | 4.613609  | 5.482485  | 8.325432  |
| O  | 3.913056  | 2.698856  | 8.367237  |
| Ti | 5.464274  | 3.823181  | 7.847012  |
| O  | 5.734040  | 3.855578  | 6.033076  |
| O  | 4.092642  | 2.893407  | 3.914024  |
| Ti | 5.984158  | 4.044444  | 4.052910  |
| O  | 7.942637  | 4.178550  | 3.980901  |
| O  | 6.641623  | 1.833698  | 4.519744  |
| O  | 6.294785  | 1.607380  | 8.015753  |
| O  | 7.207711  | 3.940583  | 8.742128  |
| O  | 8.892388  | 2.907440  | 6.554737  |
| Ti | 8.014587  | 2.385984  | 8.113278  |
| O  | 9.020731  | 0.824413  | 8.618393  |
| Ti | 8.410910  | 2.586268  | 4.774434  |
| O  | 9.608518  | 1.227683  | 4.188593  |
| Ti | 8.997720  | -0.439966 | 4.751124  |
| Ti | 8.753480  | -0.673204 | 7.537802  |
| O  | 8.336455  | -1.763968 | 3.535495  |
| Ti | 6.411507  | -2.488928 | 4.112031  |
| O  | 6.551813  | -2.896535 | 5.934755  |
| O  | 8.000784  | -2.168099 | 8.327467  |
| Ti | 6.204475  | -2.600069 | 7.780916  |
| O  | 7.630802  | -0.104261 | 6.054540  |
| O  | 5.082798  | -3.877443 | 3.751102  |
| O  | 5.586110  | -0.872349 | 3.866995  |
| Ti | 4.938039  | 0.892783  | 4.288909  |

|    |           |           |          |
|----|-----------|-----------|----------|
| O  | 10.060434 | -1.069093 | 6.186327 |
| O  | 4.302985  | 0.652892  | 6.054077 |
| O  | 5.329046  | -1.047082 | 8.266189 |
| Ti | 4.576698  | 0.650271  | 7.863894 |
| Ti | -5.464177 | 1.953218  | 7.324173 |
| Ti | -6.068113 | 2.030227  | 4.509810 |
| O  | -4.581204 | 3.368372  | 8.095858 |
| Ti | -2.833817 | 4.153215  | 7.752936 |
| O  | -3.288429 | 4.864418  | 6.093146 |
| O  | -4.987729 | 3.579557  | 4.050444 |
| Ti | -3.071025 | 4.200841  | 4.354679 |
| O  | -4.610643 | 1.188885  | 5.730541 |
| O  | -1.567752 | 5.390590  | 8.429462 |
| O  | -1.895412 | 2.577572  | 7.943611 |
| Ti | -1.276810 | 0.774316  | 7.846542 |
| O  | -6.896821 | 2.476633  | 6.128106 |
| O  | -1.069746 | 0.442230  | 6.062560 |
| O  | -2.171170 | 2.582924  | 4.441678 |
| Ti | -1.461225 | 0.833559  | 4.249469 |
| Ti | -4.657209 | -0.980396 | 8.108832 |
| O  | -5.780510 | 0.529702  | 8.493177 |
| O  | -3.157837 | -0.288100 | 4.020521 |
| O  | -4.359061 | -2.523268 | 3.896380 |
| O  | -5.369424 | -1.500132 | 6.462131 |
| Ti | -4.952195 | -0.810991 | 4.754350 |
| O  | -6.339948 | 0.179372  | 3.957065 |
| O  | -3.013378 | -0.055265 | 8.153427 |
| Ti | -0.162081 | -5.174050 | 4.627786 |
| O  | -0.463928 | -6.245002 | 6.153320 |
| Ti | 0.108607  | -4.895444 | 7.393418 |
| O  | 0.426992  | -3.777735 | 5.897844 |
| O  | -1.254846 | -4.107802 | 8.389542 |
| O  | -1.764599 | -4.272233 | 4.053390 |
| O  | -0.605893 | -1.446489 | 4.000402 |
| Ti | -2.292401 | -2.489666 | 4.325418 |
| O  | -2.429416 | -2.328036 | 6.215665 |
| O  | -0.575169 | -1.283781 | 8.520958 |
| Ti | -2.066871 | -2.430383 | 8.060464 |
| O  | -3.818340 | -2.467781 | 8.889416 |
| O  | 0.464722  | 1.098794  | 8.668385 |
| O  | 0.484674  | 1.241922  | 3.906798 |
| Ti | 3.149732  | -4.121002 | 4.283677 |
| O  | 3.499893  | -4.424190 | 6.099326 |
| O  | 4.990233  | -3.883793 | 8.429236 |
| Ti | 3.166802  | -4.014301 | 7.893160 |
| O  | 1.726442  | -5.207982 | 8.279457 |
| O  | 1.670848  | -5.445704 | 3.958935 |
| O  | 2.471094  | -2.405267 | 4.159920 |
| Ti | 1.318287  | -0.884194 | 4.344736 |
| O  | 1.365459  | -0.719609 | 6.233342 |
| O  | 2.318494  | -2.422706 | 8.402410 |
| Ti | 1.347508  | -0.827616 | 8.078626 |

## 48c-like 3-D (1,0,1)-mer

|    |           |           |           |
|----|-----------|-----------|-----------|
| Ti | -1.566881 | 4.730463  | 1.780980  |
| O  | -1.863893 | 5.005828  | -0.064786 |
| O  | -3.337765 | 4.725290  | -2.501231 |
| Ti | -1.535610 | 4.792657  | -1.888722 |
| O  | -0.187190 | 6.099509  | -2.240010 |
| O  | -0.132078 | 6.104970  | 2.116213  |
| O  | -0.841548 | 3.041748  | 1.915359  |
| Ti | 0.262206  | 1.503773  | 1.602146  |
| O  | 0.251470  | 1.477494  | -0.294403 |
| O  | -0.641197 | 3.252651  | -2.472328 |
| Ti | 0.336308  | 1.662834  | -2.132009 |
| O  | 1.267361  | -0.254131 | -2.702984 |
| O  | 1.136782  | -0.558333 | 1.910976  |
| Ti | 1.716723  | 5.972261  | 1.418575  |
| O  | 1.966650  | 7.123501  | -0.062073 |
| Ti | 1.431457  | 5.810005  | -1.352009 |
| O  | 1.143218  | 4.614468  | 0.073716  |
| O  | 2.833922  | 5.111245  | -2.370138 |
| O  | 3.308905  | 5.024918  | 1.885556  |
| O  | 2.178034  | 2.133636  | 1.967558  |
| Ti | 3.811502  | 3.240895  | 1.615048  |
| O  | 3.979799  | 3.135631  | -0.290873 |
| O  | 2.216791  | 2.162911  | -2.545559 |
| Ti | 3.558192  | 3.387683  | -2.091721 |
| O  | 5.190968  | 3.031413  | -3.025894 |
| O  | 4.675212  | 0.348385  | -2.491589 |
| O  | 4.797397  | 1.027174  | 1.979424  |
| O  | 5.908394  | 3.345002  | 1.936353  |
| O  | 6.750178  | 2.193546  | -0.645557 |
| Ti | 6.503437  | 1.621350  | 1.137302  |
| O  | 7.982123  | 0.738395  | 1.897600  |
| Ti | 6.102310  | 1.564922  | -2.284772 |
| O  | 7.430295  | 0.167597  | -2.488073 |
| Ti | 7.084876  | -1.209117 | -1.284571 |
| Ti | 7.740112  | -1.143877 | 1.531598  |
| O  | 6.149582  | -2.631692 | -2.029432 |
| Ti | 4.501544  | -3.460920 | -1.519627 |
| O  | 5.062165  | -4.180701 | 0.096676  |
| O  | 6.712287  | -2.736270 | 2.053770  |
| Ti | 4.810099  | -3.434241 | 1.804963  |
| O  | 6.206439  | -0.452505 | 0.290643  |
| O  | 3.330019  | -4.699376 | -2.345708 |
| O  | 3.302054  | -2.034533 | -1.483875 |
| Ti | 2.980827  | -0.162637 | -1.824266 |
| O  | 8.533182  | -1.665276 | -0.092530 |
| O  | 2.927878  | 0.486671  | -0.114290 |
| O  | 3.862728  | -1.842550 | 1.666678  |
| Ti | 3.099011  | -0.089823 | 1.689802  |
| Ti | -7.355614 | 1.059990  | 1.343487  |
| Ti | -7.089766 | 1.375832  | -1.469502 |

|    |           |           |           |
|----|-----------|-----------|-----------|
| O  | -6.776615 | 2.714051  | 2.255033  |
| Ti | -4.843279 | 3.270780  | 1.785587  |
| O  | -4.872308 | 3.721886  | -0.033772 |
| O  | -6.327996 | 2.867016  | -2.262994 |
| Ti | -4.530196 | 3.416030  | -1.860560 |
| O  | -6.027054 | 0.603498  | -0.008631 |
| O  | -3.483208 | 4.608238  | 2.274365  |
| O  | -4.021631 | 1.635512  | 1.951343  |
| Ti | -3.371676 | -0.168411 | 1.624813  |
| O  | -8.365066 | 1.774723  | -0.119373 |
| O  | -2.774175 | 0.108376  | -0.145663 |
| O  | -3.630330 | 1.882836  | -2.381109 |
| Ti | -2.915081 | 0.178818  | -1.971557 |
| Ti | -6.881617 | -1.861897 | 1.039771  |
| O  | -8.159847 | -0.656484 | 1.659159  |
| O  | -4.651875 | -0.746120 | -2.176988 |
| O  | -5.465576 | -3.122382 | -2.850359 |
| O  | -7.256516 | -2.158275 | -0.777526 |
| Ti | -6.361201 | -1.569661 | -2.290198 |
| O  | -7.396086 | -0.012685 | -2.696767 |
| O  | -5.211572 | -1.049784 | 1.891379  |
| Ti | -1.438023 | -5.069441 | -0.920280 |
| O  | -1.974614 | -6.290476 | 0.381249  |
| Ti | -1.897107 | -5.107048 | 1.882229  |
| O  | -1.166173 | -3.732012 | 0.578127  |
| O  | -3.773040 | -4.993583 | 2.131237  |
| O  | -2.801585 | -4.525203 | -2.018346 |
| O  | -2.238281 | -1.855948 | -2.384249 |
| Ti | -3.825937 | -2.918305 | -1.816489 |
| O  | -4.246315 | -2.859101 | -0.022121 |
| O  | -2.609425 | -2.174295 | 1.984491  |
| Ti | -4.534419 | -3.310376 | 1.931217  |
| O  | -6.473813 | -3.487080 | 1.807198  |
| O  | -1.366258 | 0.232033  | 2.013216  |
| O  | -1.129895 | 0.441816  | -2.766432 |
| Ti | 1.559205  | -4.373495 | -1.741421 |
| O  | 1.664075  | -4.416556 | 0.158475  |
| O  | 3.399716  | -4.722677 | 2.327256  |
| Ti | 1.452270  | -4.604904 | 2.024810  |
| O  | -0.151085 | -5.717122 | 2.543394  |
| O  | 0.110790  | -5.597545 | -1.815300 |
| O  | 0.656192  | -2.988764 | -2.646381 |
| Ti | -0.284979 | -1.442212 | -2.116366 |
| O  | -0.202212 | -1.494628 | -0.280159 |
| O  | 0.815489  | -2.914615 | 2.609324  |
| Ti | -0.609953 | -1.822453 | 1.583450  |
| Ti | -0.081402 | 5.670904  | 7.570461  |
| O  | -0.120766 | 6.366847  | 5.823667  |
| O  | -1.670838 | 5.200646  | 3.962532  |
| Ti | 0.264040  | 5.619779  | 4.155665  |
| O  | 1.973171  | 6.652066  | 3.492111  |
| O  | 1.528038  | 6.814515  | 7.946434  |

|    |           |           |          |
|----|-----------|-----------|----------|
| O  | 0.542922  | 3.948023  | 7.602807 |
| Ti | 1.940803  | 2.610414  | 7.972604 |
| O  | 2.119233  | 2.204874  | 6.114559 |
| O  | 1.101014  | 3.976899  | 4.048762 |
| Ti | 2.090299  | 2.306644  | 4.285842 |
| O  | 2.946444  | 0.246069  | 3.780317 |
| O  | 2.812724  | 0.293988  | 8.239045 |
| Ti | 3.367254  | 6.523389  | 7.357309 |
| O  | 3.798165  | 7.666521  | 5.925185 |
| Ti | 3.514083  | 6.310183  | 4.581293 |
| O  | 3.021422  | 5.162621  | 6.034421 |
| O  | 5.145846  | 5.784250  | 3.866714 |
| O  | 5.038581  | 5.733022  | 8.149327 |
| O  | 4.028978  | 2.927043  | 8.179949 |
| Ti | 5.731685  | 3.907627  | 7.674730 |
| O  | 5.870695  | 3.869273  | 5.859590 |
| O  | 4.057792  | 2.900173  | 3.771260 |
| Ti | 5.943986  | 4.056139  | 3.877905 |
| O  | 7.908596  | 4.190164  | 3.708064 |
| O  | 6.724940  | 1.788204  | 4.330677 |
| O  | 6.560929  | 1.739559  | 8.121390 |
| O  | 7.702258  | 4.080549  | 8.188481 |
| O  | 9.099996  | 2.940532  | 6.245478 |
| Ti | 8.487506  | 2.172790  | 7.845222 |
| O  | 9.910584  | 0.968123  | 8.578191 |
| Ti | 8.442818  | 2.625636  | 4.514171 |
| O  | 9.706157  | 1.198277  | 4.099476 |
| Ti | 9.158955  | -0.341585 | 4.912910 |
| Ti | 9.571750  | -0.781264 | 7.718597 |
| O  | 8.381650  | -1.477807 | 3.587147 |
| Ti | 6.570028  | -2.453425 | 4.170976 |
| O  | 7.044988  | -2.982328 | 5.878887 |
| O  | 8.414427  | -2.244731 | 8.101815 |
| Ti | 6.451274  | -2.594037 | 7.657372 |
| O  | 8.271492  | 0.280059  | 6.569954 |
| O  | 5.244512  | -3.873795 | 3.879444 |
| O  | 5.700742  | -0.851536 | 4.127996 |
| Ti | 4.915730  | 0.923175  | 4.239929 |
| O  | 10.437153 | -1.164050 | 6.090724 |
| O  | 4.479322  | 1.099682  | 6.031274 |
| O  | 5.624939  | -0.953179 | 7.688513 |
| Ti | 4.734498  | 0.749447  | 7.845623 |
| Ti | -5.895483 | 1.799922  | 7.119446 |
| Ti | -6.308066 | 2.240283  | 4.313606 |
| O  | -5.117164 | 2.935755  | 8.445509 |
| Ti | -3.305036 | 3.910353  | 7.861164 |
| O  | -3.780046 | 4.438618  | 6.153093 |
| O  | -5.150228 | 3.703154  | 3.930291 |
| Ti | -3.186527 | 4.050964  | 4.374266 |
| O  | -5.008802 | 1.177495  | 5.462060 |
| O  | -1.978231 | 5.329877  | 8.152508 |
| O  | -2.437421 | 2.307494  | 7.905226 |

|    |           |           |           |
|----|-----------|-----------|-----------|
| Ti | -1.652987 | 0.532464  | 7.792360  |
| O  | -7.173098 | 2.623367  | 5.941569  |
| O  | -1.217697 | 0.357053  | 6.000959  |
| O  | -2.361418 | 2.409757  | 4.342750  |
| Ti | -1.472083 | 0.706279  | 4.186279  |
| Ti | -5.181043 | -1.167676 | 7.518759  |
| O  | -6.443948 | 0.260437  | 7.932894  |
| O  | -3.298959 | -0.282391 | 3.912079  |
| O  | -4.441397 | -2.622948 | 3.844256  |
| O  | -5.838298 | -1.482261 | 5.787443  |
| Ti | -5.225994 | -0.714971 | 4.187590  |
| O  | -6.649147 | 0.490561  | 3.454845  |
| O  | -3.462893 | -0.330929 | 7.702410  |
| Ti | -0.103222 | -5.062701 | 4.677322  |
| O  | -0.533232 | -6.206285 | 6.109368  |
| Ti | -0.250653 | -4.849933 | 7.453845  |
| O  | 0.239815  | -3.701154 | 6.000866  |
| O  | -1.884292 | -4.327462 | 8.168135  |
| O  | -1.776432 | -4.274865 | 3.885659  |
| O  | -0.766757 | -1.470763 | 3.851392  |
| Ti | -2.470852 | -2.449207 | 4.358692  |
| O  | -2.609888 | -2.411583 | 6.174111  |
| O  | -0.795608 | -1.444616 | 8.260870  |
| Ti | -2.682957 | -2.599874 | 8.155804  |
| O  | -4.647362 | -2.732325 | 8.325563  |
| O  | 0.316596  | 1.209123  | 8.251508  |
| O  | 0.450160  | 1.160601  | 3.791698  |
| Ti | 3.347637  | -4.212462 | 4.463538  |
| O  | 3.387211  | -4.910490 | 6.209884  |
| O  | 4.935918  | -3.743714 | 8.070468  |
| Ti | 3.001137  | -4.162793 | 7.877473  |
| O  | 1.291965  | -5.193858 | 8.540739  |
| O  | 1.735709  | -5.353380 | 4.088989  |
| O  | 2.721613  | -2.490388 | 4.432384  |
| Ti | 1.322272  | -1.154852 | 4.058693  |
| O  | 1.141579  | -0.748178 | 5.916623  |
| O  | 2.163519  | -2.519760 | 7.983191  |
| Ti | 1.171833  | -0.851490 | 7.745070  |
| Ti | 1.707057  | 5.836110  | 13.776129 |
| O  | 1.601318  | 5.874357  | 11.875673 |
| O  | -0.135351 | 6.180607  | 9.707002  |
| Ti | 1.811806  | 6.062913  | 10.008437 |
| O  | 3.414663  | 7.176509  | 9.491256  |
| O  | 3.154745  | 7.058745  | 13.850998 |
| O  | 2.608726  | 4.449490  | 14.677483 |
| Ti | 3.547561  | 2.901457  | 14.148671 |
| O  | 3.458862  | 2.953705  | 12.311848 |
| O  | 2.446608  | 4.372613  | 9.423265  |
| Ti | 3.871957  | 3.280683  | 10.448306 |
| O  | 4.628176  | 1.225883  | 10.018041 |
| O  | 4.392288  | 1.016182  | 14.798538 |
| Ti | 4.702722  | 6.529238  | 12.955150 |



|    |           |           |           |
|----|-----------|-----------|-----------|
| O  | 5.239695  | 7.750106  | 11.654122 |
| Ti | 5.160097  | 6.566896  | 10.153218 |
| O  | 4.427943  | 5.192366  | 11.456697 |
| O  | 7.035215  | 6.451620  | 9.901265  |
| O  | 6.066829  | 5.984143  | 14.052794 |
| O  | 5.500743  | 3.314400  | 14.416116 |
| Ti | 7.088424  | 4.376269  | 13.849203 |
| O  | 7.507112  | 4.317375  | 12.054607 |
| O  | 5.870076  | 3.632532  | 10.048928 |
| Ti | 7.795946  | 4.768151  | 10.101312 |
| O  | 9.735324  | 4.945483  | 10.225205 |
| O  | 8.473059  | 2.507983  | 10.142162 |
| O  | 7.914051  | 2.204878  | 14.207931 |
| O  | 8.728434  | 4.580589  | 14.883306 |
| O  | 10.518739 | 3.616926  | 12.809955 |
| Ti | 9.623570  | 3.028174  | 14.322507 |
| O  | 10.657806 | 1.471517  | 14.729485 |
| Ti | 10.143835 | 3.319956  | 10.991764 |
| O  | 11.421658 | 2.114839  | 10.374236 |
| Ti | 10.618132 | 0.398286  | 10.689236 |
| Ti | 10.352911 | 0.082897  | 13.502358 |
| O  | 10.040458 | -1.254440 | 9.778944  |
| Ti | 8.106940  | -1.812449 | 10.246850 |
| O  | 8.136687  | -2.263201 | 12.066586 |
| O  | 9.592072  | -1.409322 | 14.295955 |
| Ti | 7.794052  | -1.956970 | 13.893035 |
| O  | 9.289552  | 0.854086  | 12.041384 |
| O  | 6.748405  | -3.150745 | 9.757858  |
| O  | 7.284100  | -0.177667 | 10.081114 |
| Ti | 6.633252  | 1.625809  | 10.407496 |
| O  | 11.628226 | -0.315343 | 12.152148 |
| O  | 6.035291  | 1.349537  | 12.177870 |
| O  | 6.893857  | -0.423824 | 14.413882 |
| Ti | 6.177527  | 1.279197  | 14.003429 |
| Ti | -3.821266 | 2.668265  | 13.317022 |
| Ti | -4.476043 | 2.602733  | 10.500719 |
| O  | -2.886653 | 4.091060  | 14.062322 |
| Ti | -1.237804 | 4.919198  | 13.553292 |
| O  | -1.797505 | 5.638948  | 11.935982 |
| O  | -3.448133 | 4.195311  | 9.978101  |
| Ti | -1.545764 | 4.892421  | 10.227627 |
| O  | -2.942856 | 1.910830  | 11.742132 |
| O  | -0.065134 | 6.157866  | 14.379069 |
| O  | -0.041410 | 3.491191  | 13.517158 |
| Ti | 0.281796  | 1.620675  | 13.856551 |
| O  | -5.269019 | 3.124589  | 12.124541 |
| O  | 0.335569  | 0.971612  | 12.146038 |
| O  | -0.598927 | 3.300041  | 10.365360 |
| Ti | 0.163713  | 1.547306  | 10.341407 |
| Ti | -2.839906 | -0.106425 | 14.317479 |
| O  | -4.167494 | 1.291112  | 14.520403 |
| O  | -1.534354 | 0.429422  | 10.053253 |

|    |           |           |           |
|----|-----------|-----------|-----------|
| O  | -2.645858 | -1.887535 | 10.096910 |
| O  | -3.487498 | -0.734772 | 12.678227 |
| Ti | -3.240432 | -0.163387 | 10.895532 |
| O  | -4.718482 | 0.720430  | 10.135078 |
| O  | -1.412441 | 1.109346  | 14.525285 |
| Ti | 1.548042  | -4.513101 | 10.614290 |
| O  | 1.297801  | -5.664671 | 12.094816 |
| Ti | 1.832789  | -4.349797 | 13.385148 |
| O  | 2.120295  | -3.155098 | 11.958715 |
| O  | 0.429937  | -3.652327 | 14.402243 |
| O  | -0.045378 | -3.567662 | 10.145427 |
| O  | 1.084625  | -0.677282 | 10.064545 |
| Ti | -0.548828 | -1.784403 | 10.417077 |
| O  | -0.716691 | -1.678657 | 12.322821 |
| O  | 1.047527  | -0.702382 | 14.577253 |
| Ti | -0.295742 | -1.932646 | 14.124012 |
| O  | -1.929346 | -1.573326 | 15.057823 |
| O  | 1.995488  | 1.712520  | 14.734609 |
| O  | 2.126512  | 2.014105  | 10.120170 |
| Ti | 4.831734  | -3.271902 | 10.251585 |
| O  | 5.127929  | -3.546000 | 12.097948 |
| O  | 6.600490  | -3.266137 | 14.534408 |
| Ti | 4.800048  | -3.334312 | 13.920629 |
| O  | 3.452034  | -4.640040 | 14.272242 |
| O  | 3.396951  | -4.646205 | 9.917609  |
| O  | 4.106489  | -1.583143 | 10.117056 |
| Ti | 3.000036  | -0.047024 | 10.429457 |
| O  | 3.010549  | -0.019046 | 12.326178 |
| O  | 3.904121  | -1.793209 | 14.504870 |
| Ti | 2.925889  | -0.204335 | 14.163473 |

48c-like 3-D (1,0,2)-mer

|    |           |           |           |
|----|-----------|-----------|-----------|
| Ti | -1.525968 | 4.748807  | 1.776553  |
| O  | -1.855712 | 5.039680  | -0.059461 |
| O  | -3.367190 | 4.725511  | -2.444619 |
| Ti | -1.549578 | 4.794063  | -1.885002 |
| O  | -0.198846 | 6.087736  | -2.273159 |
| O  | -0.085974 | 6.121472  | 2.105755  |
| O  | -0.832062 | 3.037087  | 1.877159  |
| Ti | 0.222782  | 1.473458  | 1.525548  |
| O  | 0.212306  | 1.464102  | -0.367819 |
| O  | -0.672142 | 3.248353  | -2.499139 |
| Ti | 0.306557  | 1.650188  | -2.203968 |
| O  | 1.246380  | -0.274267 | -2.765114 |
| O  | 1.117198  | -0.573321 | 1.865370  |
| Ti | 1.739074  | 5.986754  | 1.384579  |
| O  | 1.974660  | 7.123605  | -0.113835 |
| Ti | 1.422152  | 5.799744  | -1.385743 |
| O  | 1.126030  | 4.621987  | 0.042092  |
| O  | 2.814841  | 5.081617  | -2.414986 |
| O  | 3.316832  | 5.003048  | 1.794433  |
| O  | 2.147984  | 2.115816  | 1.876894  |

|    |           |           |           |
|----|-----------|-----------|-----------|
| Ti | 3.811359  | 3.221227  | 1.533687  |
| O  | 3.955335  | 3.079569  | -0.367092 |
| O  | 2.184468  | 2.144891  | -2.628111 |
| Ti | 3.534863  | 3.357486  | -2.163532 |
| O  | 5.196935  | 3.006703  | -3.056351 |
| O  | 4.665988  | 0.331873  | -2.514585 |
| O  | 4.761742  | 1.008056  | 1.911770  |
| O  | 5.883564  | 3.338636  | 1.886645  |
| O  | 6.746683  | 2.166123  | -0.634468 |
| Ti | 6.507813  | 1.603334  | 1.153337  |
| O  | 7.993088  | 0.726632  | 1.931878  |
| Ti | 6.086999  | 1.546111  | -2.275010 |
| O  | 7.428379  | 0.150419  | -2.450511 |
| Ti | 7.106053  | -1.225004 | -1.239946 |
| Ti | 7.742772  | -1.163534 | 1.583414  |
| O  | 6.178552  | -2.644875 | -1.994166 |
| Ti | 4.515292  | -3.475554 | -1.526551 |
| O  | 5.071901  | -4.202249 | 0.090571  |
| O  | 6.714393  | -2.764975 | 2.081764  |
| Ti | 4.819887  | -3.456555 | 1.800634  |
| O  | 6.218859  | -0.474925 | 0.331188  |
| O  | 3.343282  | -4.719163 | -2.348760 |
| O  | 3.309703  | -2.050740 | -1.534038 |
| Ti | 2.956793  | -0.189060 | -1.882204 |
| O  | 8.551277  | -1.678437 | -0.038219 |
| O  | 2.876442  | 0.458706  | -0.174660 |
| O  | 3.859893  | -1.874537 | 1.618243  |
| Ti | 3.080311  | -0.131182 | 1.620450  |
| Ti | -7.305522 | 1.036172  | 1.472983  |
| Ti | -7.079494 | 1.383420  | -1.343264 |
| O  | -6.685621 | 2.648618  | 2.419016  |
| Ti | -4.802311 | 3.211355  | 1.888585  |
| O  | -4.853993 | 3.699398  | 0.064464  |
| O  | -6.340915 | 2.872248  | -2.166512 |
| Ti | -4.543962 | 3.414920  | -1.765200 |
| O  | -5.981188 | 0.624200  | 0.080992  |
| O  | -3.449090 | 4.590046  | 2.311535  |
| O  | -3.934347 | 1.597580  | 1.985846  |
| Ti | -3.418304 | -0.230705 | 1.565548  |
| O  | -8.334762 | 1.772185  | 0.027279  |
| O  | -2.776390 | 0.047966  | -0.189094 |
| O  | -3.638674 | 1.890424  | -2.332512 |
| Ti | -2.926054 | 0.173441  | -2.009547 |
| Ti | -6.939336 | -1.924327 | 1.074117  |
| O  | -8.156211 | -0.685878 | 1.723594  |
| O  | -4.662334 | -0.752289 | -2.200762 |
| O  | -5.498459 | -3.119962 | -2.853389 |
| O  | -7.277468 | -2.169599 | -0.750198 |
| Ti | -6.374568 | -1.565129 | -2.258396 |
| O  | -7.407600 | 0.010506  | -2.587805 |
| O  | -5.255168 | -1.105228 | 1.862060  |
| Ti | -1.432061 | -5.093737 | -0.967378 |

|    |           |           |           |
|----|-----------|-----------|-----------|
| O  | -1.947708 | -6.323229 | 0.332193  |
| Ti | -1.888201 | -5.132927 | 1.833215  |
| O  | -1.163981 | -3.757058 | 0.525346  |
| O  | -3.766124 | -5.058072 | 2.058383  |
| O  | -2.798061 | -4.547573 | -2.068249 |
| O  | -2.248510 | -1.876374 | -2.433465 |
| Ti | -3.829254 | -2.943939 | -1.863343 |
| O  | -4.236216 | -2.897874 | -0.066746 |
| O  | -2.619852 | -2.215698 | 1.927553  |
| Ti | -4.539048 | -3.379426 | 1.867626  |
| O  | -6.480886 | -3.565904 | 1.776146  |
| O  | -1.393982 | 0.207310  | 1.954756  |
| O  | -1.152490 | 0.414548  | -2.835357 |
| Ti | 1.563217  | -4.393050 | -1.767793 |
| O  | 1.665857  | -4.440339 | 0.131367  |
| O  | 3.403392  | -4.740893 | 2.324005  |
| Ti | 1.463885  | -4.619704 | 1.998789  |
| O  | -0.141981 | -5.729789 | 2.510101  |
| O  | 0.119968  | -5.622391 | -1.860108 |
| O  | 0.658873  | -3.011602 | -2.672392 |
| Ti | -0.297698 | -1.464001 | -2.160167 |
| O  | -0.195846 | -1.507259 | -0.325603 |
| O  | 0.814449  | -2.931165 | 2.565348  |
| Ti | -0.625370 | -1.845711 | 1.536875  |
| Ti | 0.137757  | 5.638436  | 7.689450  |
| O  | 0.024723  | 6.279651  | 5.910213  |
| O  | -1.587939 | 5.286731  | 3.926615  |
| Ti | 0.340558  | 5.660263  | 4.175146  |
| O  | 2.014226  | 6.702784  | 3.454451  |
| O  | 1.633794  | 6.932848  | 8.106181  |
| O  | 0.869645  | 3.935158  | 7.783200  |
| Ti | 1.923956  | 2.335409  | 7.758426  |
| O  | 2.027236  | 2.004869  | 5.930254  |
| O  | 1.148177  | 3.994233  | 3.985323  |
| Ti | 2.055885  | 2.298724  | 4.103718  |
| O  | 2.933063  | 0.200875  | 3.707221  |
| O  | 2.794920  | 0.170314  | 8.147294  |
| Ti | 3.478275  | 6.656322  | 7.409758  |
| O  | 3.882878  | 7.760843  | 5.921733  |
| Ti | 3.512051  | 6.395290  | 4.619678  |
| O  | 2.907628  | 5.321749  | 6.050975  |
| O  | 5.098525  | 5.758504  | 3.885048  |
| O  | 4.994814  | 5.662637  | 7.967295  |
| O  | 3.910097  | 2.841882  | 8.085974  |
| Ti | 5.606968  | 3.893688  | 7.612876  |
| O  | 5.796272  | 3.733057  | 5.781135  |
| O  | 4.031050  | 2.863834  | 3.701543  |
| Ti | 5.900433  | 4.033488  | 3.853777  |
| O  | 7.868618  | 4.134630  | 3.633383  |
| O  | 6.714753  | 1.694911  | 4.211000  |
| O  | 6.543188  | 1.672715  | 8.092545  |
| O  | 7.607781  | 4.063055  | 8.077401  |

|    |           |           |          |
|----|-----------|-----------|----------|
| O  | 9.044226  | 2.904510  | 6.128366 |
| Ti | 8.430233  | 2.203618  | 7.757167 |
| O  | 9.848100  | 1.025579  | 8.527180 |
| Ti | 8.420225  | 2.551960  | 4.389505 |
| O  | 9.729127  | 1.117005  | 4.092943 |
| Ti | 9.161446  | -0.391485 | 4.945042 |
| Ti | 9.518345  | -0.772990 | 7.765390 |
| O  | 8.374911  | -1.543004 | 3.636480 |
| Ti | 6.554491  | -2.490855 | 4.216255 |
| O  | 6.977383  | -2.999852 | 5.953878 |
| O  | 8.368867  | -2.258306 | 8.186038 |
| Ti | 6.408420  | -2.680959 | 7.760844 |
| O  | 8.224994  | 0.233301  | 6.562842 |
| O  | 5.239730  | -3.907967 | 3.881399 |
| O  | 5.676279  | -0.898302 | 4.100930 |
| Ti | 4.887842  | 0.877546  | 4.178538 |
| O  | 10.408385 | -1.207208 | 6.163374 |
| O  | 4.494226  | 1.029822  | 5.986070 |
| O  | 5.567688  | -1.049370 | 7.784811 |
| Ti | 4.747559  | 0.681558  | 7.796641 |
| Ti | -5.648186 | 1.521950  | 7.380554 |
| Ti | -6.167497 | 2.096346  | 4.539383 |
| O  | -5.073627 | 3.245887  | 8.214283 |
| Ti | -3.232819 | 4.040278  | 7.747040 |
| O  | -3.601915 | 4.746835  | 6.079785 |
| O  | -5.009715 | 3.535127  | 4.072065 |
| Ti | -3.087738 | 4.111974  | 4.376159 |
| O  | -4.903677 | 0.901995  | 5.584557 |
| O  | -1.761863 | 5.298048  | 8.155071 |
| O  | -2.438333 | 2.367720  | 7.714386 |
| Ti | -1.746064 | 0.544521  | 7.695718 |
| O  | -6.940755 | 2.419587  | 6.187616 |
| O  | -1.571484 | 0.172480  | 5.911206 |
| O  | -2.226059 | 2.473129  | 4.402356 |
| Ti | -1.527480 | 0.710212  | 4.098658 |
| Ti | -5.257842 | -1.425700 | 7.388784 |
| O  | -6.495507 | -0.090908 | 7.919116 |
| O  | -3.333160 | -0.326596 | 3.825309 |
| O  | -4.413697 | -2.707104 | 3.773000 |
| O  | -5.889537 | -1.739395 | 5.661663 |
| Ti | -5.236998 | -0.821801 | 4.161680 |
| O  | -6.650170 | 0.430860  | 3.545793 |
| O  | -3.634491 | -0.322723 | 7.971319 |
| Ti | -0.118036 | -5.071787 | 4.643083 |
| O  | -0.531998 | -6.245718 | 6.051298 |
| Ti | -0.277781 | -4.909207 | 7.423392 |
| O  | 0.177209  | -3.716478 | 5.987683 |
| O  | -1.922427 | -4.439903 | 8.133755 |
| O  | -1.785704 | -4.290928 | 3.840295 |
| O  | -0.775770 | -1.495534 | 3.789812 |
| Ti | -2.466039 | -2.460797 | 4.326194 |
| O  | -2.723933 | -2.403836 | 6.149047 |

|    |           |           |           |
|----|-----------|-----------|-----------|
| O  | -0.884368 | -1.473094 | 8.168171  |
| Ti | -2.683055 | -2.704441 | 8.107966  |
| O  | -4.644736 | -2.928507 | 8.232887  |
| O  | 0.223661  | 1.110751  | 8.096814  |
| O  | 0.401543  | 1.130842  | 3.733087  |
| Ti | 3.335309  | -4.215078 | 4.465572  |
| O  | 3.385455  | -4.905717 | 6.218453  |
| O  | 4.935808  | -3.887140 | 8.185512  |
| Ti | 2.980411  | -4.228524 | 7.913964  |
| O  | 1.235094  | -5.222847 | 8.526868  |
| O  | 1.726441  | -5.348645 | 4.082067  |
| O  | 2.710907  | -2.495351 | 4.412733  |
| Ti | 1.303467  | -1.166269 | 4.015605  |
| O  | 1.034087  | -0.794123 | 5.865699  |
| O  | 2.174500  | -2.567018 | 7.972342  |
| Ti | 1.071782  | -0.978741 | 7.696505  |
| Ti | 1.561687  | 6.402946  | 13.584648 |
| O  | 1.512118  | 7.092499  | 11.831503 |
| O  | -0.039794 | 6.074672  | 9.864094  |
| Ti | 1.915369  | 6.416484  | 10.135551 |
| O  | 3.661146  | 7.410679  | 9.522683  |
| O  | 3.169084  | 7.538304  | 13.968818 |
| O  | 2.185382  | 4.682517  | 13.637913 |
| Ti | 3.590987  | 3.352046  | 14.032802 |
| O  | 3.858462  | 2.980599  | 12.182352 |
| O  | 2.721061  | 4.754091  | 10.076050 |
| Ti | 3.821130  | 3.164508  | 10.351403 |
| O  | 4.669876  | 1.075049  | 9.951528  |
| O  | 4.492582  | 1.054483  | 14.314898 |
| Ti | 5.013401  | 7.261663  | 13.407375 |
| O  | 5.428477  | 8.434733  | 11.998807 |
| Ti | 5.172785  | 7.098060  | 10.627391 |
| O  | 4.717116  | 5.906186  | 12.063333 |
| O  | 6.816007  | 6.625908  | 9.915818  |
| O  | 6.680320  | 6.478044  | 14.210013 |
| O  | 5.669606  | 3.681566  | 14.258767 |
| Ti | 7.359178  | 4.648009  | 13.723096 |
| O  | 7.616618  | 4.590569  | 11.900301 |
| O  | 5.777565  | 3.658989  | 9.880633  |
| Ti | 7.576345  | 4.890206  | 9.941320  |
| O  | 9.537947  | 5.115780  | 9.816750  |
| O  | 8.527423  | 2.510520  | 10.077876 |
| O  | 8.226788  | 2.512638  | 14.223277 |
| O  | 9.307221  | 4.893439  | 14.275991 |
| O  | 10.782768 | 3.925973  | 12.387329 |
| Ti | 10.130208 | 3.008328  | 13.887259 |
| O  | 11.544055 | 1.756360  | 14.503401 |
| Ti | 10.151369 | 3.612540  | 10.660078 |
| O  | 11.388908 | 2.278080  | 10.130015 |
| Ti | 10.543342 | 0.664743  | 10.668686 |
| Ti | 11.062852 | 0.090640  | 13.509702 |
| O  | 9.969922  | -1.059025 | 9.834549  |

|    |           |           |           |
|----|-----------|-----------|-----------|
| Ti | 8.129072  | -1.853105 | 10.301984 |
| O  | 8.498418  | -2.560658 | 11.968935 |
| O  | 9.905862  | -1.348643 | 13.976949 |
| Ti | 7.984114  | -1.925840 | 13.672480 |
| O  | 9.797845  | 1.283855  | 12.464610 |
| O  | 6.657993  | -3.110472 | 9.893918  |
| O  | 7.334333  | -0.180563 | 10.335109 |
| Ti | 6.639201  | 1.641576  | 10.353144 |
| O  | 11.836350 | -0.232058 | 11.861766 |
| O  | 6.463406  | 2.013150  | 12.137827 |
| O  | 7.121444  | -0.287554 | 13.645917 |
| Ti | 6.421747  | 1.475127  | 13.950131 |
| Ti | -4.266094 | 2.578796  | 13.104119 |
| Ti | -4.622669 | 2.960524  | 10.283691 |
| O  | -3.479050 | 3.730162  | 14.412723 |
| Ti | -1.658488 | 4.677747  | 13.832353 |
| O  | -2.081442 | 5.186563  | 12.094946 |
| O  | -3.473120 | 4.445651  | 9.862770  |
| Ti | -1.512571 | 4.868274  | 10.287857 |
| O  | -3.330101 | 1.953359  | 11.486005 |
| O  | -0.342825 | 6.094127  | 14.167089 |
| O  | -0.781304 | 3.084228  | 13.947873 |
| Ti | 0.006238  | 1.308216  | 13.870006 |
| O  | -5.512671 | 3.395171  | 11.885612 |
| O  | 0.397948  | 1.155622  | 12.062235 |
| O  | -0.672245 | 3.236256  | 10.263393 |
| Ti | 0.145598  | 1.504449  | 10.251544 |
| Ti | -3.526733 | -0.364854 | 13.659168 |
| O  | -4.835020 | 1.070406  | 13.956265 |
| O  | -1.649754 | 0.513472  | 9.956255  |
| O  | -2.714196 | -1.876432 | 9.971550  |
| O  | -4.150671 | -0.717532 | 11.921238 |
| Ti | -3.536863 | -0.017013 | 10.292118 |
| O  | -4.954513 | 1.161162  | 9.522528  |
| O  | -1.821043 | 0.491470  | 13.838544 |
| Ti | 1.416552  | -4.467784 | 10.639636 |
| O  | 1.013244  | -5.572544 | 12.127745 |
| Ti | 1.383069  | -4.206471 | 13.429740 |
| O  | 1.985511  | -3.132430 | 11.997833 |
| O  | -0.204305 | -3.571926 | 14.165259 |
| O  | -0.100985 | -3.476812 | 10.080343 |
| O  | 0.983310  | -0.656179 | 9.962228  |
| Ti | -0.713440 | -1.707808 | 10.435896 |
| O  | -0.903230 | -1.547566 | 12.267764 |
| O  | 0.862810  | -0.678135 | 14.346902 |
| Ti | -1.007069 | -1.847371 | 14.195170 |
| O  | -2.975328 | -1.948273 | 14.415896 |
| O  | 1.961248  | 1.984681  | 14.341173 |
| O  | 2.098644  | 2.015270  | 9.900925  |
| Ti | 4.758471  | -3.450771 | 10.359707 |
| O  | 4.871237  | -4.092994 | 12.138838 |
| O  | 6.484716  | -3.100848 | 14.122738 |

|    |           |           |           |
|----|-----------|-----------|-----------|
| Ti | 4.556125  | -3.473112 | 13.874089 |
| O  | 2.881751  | -4.514624 | 14.594626 |
| O  | 3.261532  | -4.744130 | 9.943818  |
| O  | 4.026587  | -1.748030 | 10.266400 |
| Ti | 2.969170  | -0.149660 | 10.289847 |
| O  | 2.864835  | 0.181193  | 12.118090 |
| O  | 3.748026  | -1.807347 | 14.063486 |
| Ti | 2.837978  | -0.113054 | 13.944642 |
| Ti | 3.333588  | 6.583476  | 19.817402 |
| O  | 3.230595  | 6.629609  | 17.919014 |
| O  | 1.492387  | 6.928562  | 15.726086 |
| Ti | 3.431588  | 6.807512  | 16.051055 |
| O  | 5.037787  | 7.918025  | 15.541032 |
| O  | 4.777051  | 7.811320  | 19.911734 |
| O  | 4.236556  | 5.200558  | 20.720404 |
| Ti | 5.193481  | 3.651415  | 20.208642 |
| O  | 5.089367  | 3.692881  | 18.374231 |
| O  | 4.079716  | 5.118050  | 15.485067 |
| Ti | 5.518963  | 4.032617  | 16.512143 |
| O  | 6.287535  | 1.979361  | 16.093557 |
| O  | 6.046614  | 1.772318  | 20.883678 |
| Ti | 6.328191  | 7.280929  | 19.017704 |
| O  | 6.844327  | 8.510506  | 17.718488 |
| Ti | 6.783226  | 7.320523  | 16.217594 |
| O  | 6.058338  | 5.945197  | 17.524928 |
| O  | 8.661220  | 7.244892  | 15.990406 |
| O  | 7.694841  | 6.734537  | 20.118171 |
| O  | 7.144092  | 4.063708  | 20.481949 |
| Ti | 8.721977  | 5.130116  | 19.912372 |
| O  | 9.129931  | 5.084413  | 18.115414 |
| O  | 7.513149  | 4.402501  | 16.121816 |
| Ti | 9.432671  | 5.565640  | 16.181109 |
| O  | 11.374413 | 5.752638  | 16.272166 |
| O  | 10.148666 | 3.291910  | 16.187333 |
| O  | 9.556555  | 2.939689  | 20.248150 |
| O  | 10.394473 | 5.307073  | 20.902685 |
| O  | 12.172068 | 4.356771  | 18.798850 |
| Ti | 11.269018 | 3.752160  | 20.306953 |
| O  | 12.301705 | 2.176813  | 20.637131 |
| Ti | 11.833359 | 4.111409  | 16.974487 |
| O  | 13.050469 | 2.873103  | 16.324998 |
| Ti | 12.200293 | 1.150871  | 16.576142 |
| Ti | 11.974495 | 0.803762  | 19.392390 |
| O  | 11.580968 | -0.461455 | 15.630922 |
| Ti | 9.697839  | -1.024113 | 16.160693 |
| O  | 9.749846  | -1.512173 | 17.984524 |
| O  | 11.236914 | -0.685532 | 20.215464 |
| Ti | 9.439571  | -1.226672 | 19.814796 |
| O  | 10.875624 | 1.562339  | 17.967980 |
| O  | 8.345166  | -2.403196 | 15.737581 |
| O  | 8.829127  | 0.589164  | 16.062728 |
| Ti | 8.311649  | 2.417128  | 16.483604 |



|    |           |           |           |
|----|-----------|-----------|-----------|
| O  | 13.229862 | 0.415579  | 18.021747 |
| O  | 7.669642  | 2.137438  | 18.237360 |
| O  | 8.534798  | 0.296954  | 20.381998 |
| Ti | 7.819832  | 2.012337  | 20.058395 |
| Ti | -2.211080 | 3.412859  | 19.288899 |
| Ti | -2.847220 | 3.351284  | 16.465625 |
| O  | -1.283581 | 4.832944  | 20.043529 |
| Ti | 0.380056  | 5.664034  | 19.575966 |
| O  | -0.175637 | 6.389325  | 17.958865 |
| O  | -1.818440 | 4.952810  | 15.966680 |
| Ti | 0.075942  | 5.644027  | 16.248508 |
| O  | -1.323713 | 2.662098  | 17.717901 |
| O  | 1.552614  | 6.906652  | 20.398423 |
| O  | 1.584011  | 4.237191  | 19.583532 |
| Ti | 1.937604  | 2.375887  | 19.931147 |
| O  | -3.655528 | 3.866601  | 18.086876 |
| O  | 2.018042  | 1.728960  | 18.223235 |
| O  | 1.035403  | 4.061542  | 16.430381 |
| Ti | 1.813792  | 2.317790  | 16.427869 |
| Ti | -1.192594 | 0.641373  | 20.324360 |
| O  | -2.533913 | 2.037353  | 20.498901 |
| O  | 0.132657  | 1.178214  | 16.136966 |
| O  | -0.989668 | -1.151861 | 16.162254 |
| O  | -1.852015 | 0.021527  | 18.683521 |
| Ti | -1.613545 | 0.583622  | 16.895724 |
| O  | -3.098255 | 1.460972  | 16.117417 |
| O  | 0.228730  | 1.855109  | 20.564371 |
| Ti | 3.156632  | -3.797553 | 16.664341 |
| O  | 2.921065  | -4.935653 | 18.162531 |
| Ti | 3.473749  | -3.611375 | 19.434525 |
| O  | 3.769450  | -2.433848 | 18.006826 |
| O  | 2.080449  | -2.894369 | 20.464040 |
| O  | 1.578406  | -2.816334 | 16.254247 |
| O  | 2.746200  | 0.070229  | 16.171630 |
| Ti | 1.082460  | -1.034972 | 16.514981 |
| O  | 0.939246  | -0.892999 | 18.415880 |
| O  | 2.709877  | 0.042151  | 20.676956 |
| Ti | 1.357452  | -1.170410 | 20.212203 |
| O  | -0.300717 | -0.819735 | 21.104846 |
| O  | 3.647877  | 2.461200  | 20.813967 |
| O  | 3.777351  | 2.759156  | 16.182934 |
| Ti | 6.422002  | -2.561512 | 16.272561 |
| O  | 6.751746  | -2.852268 | 18.108357 |
| O  | 8.263908  | -2.537676 | 20.493898 |
| Ti | 6.445457  | -2.606033 | 19.934298 |
| O  | 5.094288  | -3.900025 | 20.322074 |
| O  | 4.981827  | -3.933996 | 15.943671 |
| O  | 5.727795  | -0.849846 | 16.171632 |
| Ti | 4.671110  | 0.712767  | 16.522811 |
| O  | 4.678154  | 0.723030  | 18.416284 |
| O  | 5.567099  | -1.060457 | 20.547501 |
| Ti | 4.589113  | 0.537361  | 20.252457 |

## 48c-like 3-D (1,0,3)-mer

|    |           |           |           |
|----|-----------|-----------|-----------|
| Ti | -1.528849 | 4.751574  | 1.773467  |
| O  | -1.861651 | 5.049949  | -0.061433 |
| O  | -3.387663 | 4.733758  | -2.435374 |
| Ti | -1.566557 | 4.799879  | -1.890183 |
| O  | -0.219940 | 6.093518  | -2.302960 |
| O  | -0.088063 | 6.126981  | 2.084049  |
| O  | -0.845878 | 3.033154  | 1.860538  |
| Ti | 0.193563  | 1.467845  | 1.485230  |
| O  | 0.206379  | 1.467424  | -0.407799 |
| O  | -0.697555 | 3.255118  | -2.518205 |
| Ti | 0.292309  | 1.659971  | -2.245484 |
| O  | 1.237169  | -0.267864 | -2.806578 |
| O  | 1.106532  | -0.580758 | 1.800466  |
| Ti | 1.729630  | 6.001516  | 1.342304  |
| O  | 1.958502  | 7.134877  | -0.163170 |
| Ti | 1.407996  | 5.804221  | -1.427422 |
| O  | 1.113269  | 4.630361  | 0.001533  |
| O  | 2.795109  | 5.093222  | -2.470821 |
| O  | 3.303869  | 5.013953  | 1.739594  |
| O  | 2.117941  | 2.113412  | 1.823684  |
| Ti | 3.772313  | 3.224496  | 1.464091  |
| O  | 3.916342  | 3.076568  | -0.437392 |
| O  | 2.151898  | 2.167436  | -2.707706 |
| Ti | 3.510752  | 3.363402  | -2.233232 |
| O  | 5.178157  | 2.999537  | -3.114877 |
| O  | 4.645070  | 0.318296  | -2.586797 |
| O  | 4.738531  | 1.002015  | 1.849820  |
| O  | 5.836420  | 3.352430  | 1.788776  |
| O  | 6.726792  | 2.155576  | -0.691326 |
| Ti | 6.481660  | 1.608695  | 1.100236  |
| O  | 7.981561  | 0.761113  | 1.912526  |
| Ti | 6.062133  | 1.537039  | -2.331691 |
| O  | 7.409859  | 0.141313  | -2.490020 |
| Ti | 7.112357  | -1.222986 | -1.264060 |
| Ti | 7.754943  | -1.141564 | 1.563270  |
| O  | 6.178262  | -2.643667 | -2.012430 |
| Ti | 4.519070  | -3.480236 | -1.546351 |
| O  | 5.079797  | -4.207719 | 0.067428  |
| O  | 6.717346  | -2.742683 | 2.047929  |
| Ti | 4.834312  | -3.445977 | 1.774521  |
| O  | 6.224649  | -0.466268 | 0.302034  |
| O  | 3.350030  | -4.715779 | -2.381736 |
| O  | 3.296788  | -2.064070 | -1.557792 |
| Ti | 2.949481  | -0.206669 | -1.937476 |
| O  | 8.562902  | -1.654667 | -0.061190 |
| O  | 2.885174  | 0.470512  | -0.241769 |
| O  | 3.856655  | -1.876240 | 1.569051  |
| Ti | 3.059724  | -0.136980 | 1.549330  |
| Ti | -7.284303 | 1.009380  | 1.503813  |
| Ti | -7.078345 | 1.387069  | -1.309229 |

|    |           |           |           |
|----|-----------|-----------|-----------|
| O  | -6.661328 | 2.627040  | 2.444713  |
| Ti | -4.786359 | 3.195610  | 1.911826  |
| O  | -4.835509 | 3.690169  | 0.087538  |
| O  | -6.352966 | 2.882840  | -2.133619 |
| Ti | -4.550642 | 3.416326  | -1.747778 |
| O  | -5.958541 | 0.628934  | 0.096834  |
| O  | -3.444533 | 4.590801  | 2.329377  |
| O  | -3.915557 | 1.582154  | 1.998322  |
| Ti | -3.443140 | -0.249874 | 1.540664  |
| O  | -8.327791 | 1.753252  | 0.069151  |
| O  | -2.784906 | 0.041663  | -0.209823 |
| O  | -3.651816 | 1.897995  | -2.344071 |
| Ti | -2.936892 | 0.182501  | -2.027777 |
| Ti | -6.958601 | -1.964067 | 1.081616  |
| O  | -8.156450 | -0.713136 | 1.732189  |
| O  | -4.674483 | -0.744883 | -2.202000 |
| O  | -5.511090 | -3.109828 | -2.858718 |
| O  | -7.290845 | -2.181840 | -0.744839 |
| Ti | -6.385081 | -1.557216 | -2.246539 |
| O  | -7.419271 | 0.019478  | -2.556743 |
| O  | -5.274460 | -1.129455 | 1.850938  |
| Ti | -1.426887 | -5.087257 | -0.993671 |
| O  | -1.924585 | -6.321944 | 0.309828  |
| Ti | -1.870280 | -5.131396 | 1.813157  |
| O  | -1.164049 | -3.750539 | 0.496901  |
| O  | -3.750578 | -5.078111 | 2.035244  |
| O  | -2.800369 | -4.543556 | -2.086361 |
| O  | -2.265643 | -1.871416 | -2.462140 |
| Ti | -3.836120 | -2.940297 | -1.878059 |
| O  | -4.246779 | -2.904181 | -0.080453 |
| O  | -2.627255 | -2.231568 | 1.899094  |
| Ti | -4.537888 | -3.403021 | 1.852716  |
| O  | -6.480735 | -3.604978 | 1.769983  |
| O  | -1.410255 | 0.196631  | 1.919209  |
| O  | -1.167202 | 0.419952  | -2.867018 |
| Ti | 1.574097  | -4.361975 | -1.797173 |
| O  | 1.687039  | -4.420293 | 0.105128  |
| O  | 3.427771  | -4.739561 | 2.307247  |
| Ti | 1.493620  | -4.608213 | 1.971166  |
| O  | -0.113265 | -5.715890 | 2.481695  |
| O  | 0.131718  | -5.595980 | -1.881641 |
| O  | 0.658029  | -2.997984 | -2.718738 |
| Ti | -0.313291 | -1.458457 | -2.199935 |
| O  | -0.204798 | -1.509419 | -0.368094 |
| O  | 0.826325  | -2.926175 | 2.531203  |
| Ti | -0.634005 | -1.848588 | 1.498681  |
| Ti | 0.186900  | 5.683149  | 7.669608  |
| O  | 0.046781  | 6.312936  | 5.889762  |
| O  | -1.559010 | 5.278851  | 3.921582  |
| Ti | 0.367157  | 5.679351  | 4.155698  |
| O  | 2.017850  | 6.739152  | 3.402417  |
| O  | 1.655551  | 6.994686  | 8.118475  |

|    |           |           |          |
|----|-----------|-----------|----------|
| O  | 0.890629  | 3.962273  | 7.764957 |
| Ti | 1.867328  | 2.320454  | 7.696609 |
| O  | 1.936275  | 1.994080  | 5.870998 |
| O  | 1.168828  | 4.010010  | 3.940165 |
| Ti | 2.038587  | 2.297962  | 4.046494 |
| O  | 2.915476  | 0.191748  | 3.639170 |
| O  | 2.754171  | 0.173171  | 8.103330 |
| Ti | 3.477217  | 6.710290  | 7.383086 |
| O  | 3.894984  | 7.801761  | 5.883758 |
| Ti | 3.505112  | 6.437112  | 4.586819 |
| O  | 2.847114  | 5.392287  | 6.011247 |
| O  | 5.073957  | 5.763776  | 3.848128 |
| O  | 4.962456  | 5.657928  | 7.884422 |
| O  | 3.863677  | 2.841206  | 7.990272 |
| Ti | 5.587160  | 3.899866  | 7.523795 |
| O  | 5.750122  | 3.725856  | 5.692061 |
| O  | 4.005378  | 2.858740  | 3.631792 |
| Ti | 5.866709  | 4.032637  | 3.767726 |
| O  | 7.825217  | 4.115349  | 3.469095 |
| O  | 6.671298  | 1.693925  | 4.102316 |
| O  | 6.471649  | 1.708137  | 7.974086 |
| O  | 7.580063  | 4.099184  | 7.983592 |
| O  | 8.952580  | 2.953705  | 5.931683 |
| Ti | 8.357542  | 2.241779  | 7.561834 |
| O  | 9.828886  | 1.175387  | 8.239676 |
| Ti | 8.398679  | 2.520245  | 4.191965 |
| O  | 9.723770  | 1.086473  | 4.007772 |
| Ti | 9.158747  | -0.397145 | 4.911699 |
| Ti | 9.527284  | -0.634370 | 7.744655 |
| O  | 8.396258  | -1.566246 | 3.593274 |
| Ti | 6.578238  | -2.484137 | 4.199377 |
| O  | 7.008398  | -2.982540 | 5.944554 |
| O  | 8.411248  | -2.166840 | 8.225291 |
| Ti | 6.473744  | -2.636616 | 7.756958 |
| O  | 8.134892  | 0.198048  | 6.455449 |
| O  | 5.267917  | -3.902526 | 3.857689 |
| O  | 5.681664  | -0.900469 | 4.064381 |
| Ti | 4.860739  | 0.861619  | 4.108838 |
| O  | 10.419970 | -1.137497 | 6.151166 |
| O  | 4.401900  | 0.999186  | 5.902975 |
| O  | 5.562687  | -1.040789 | 7.748781 |
| Ti | 4.703378  | 0.668275  | 7.708412 |
| Ti | -5.573356 | 1.437921  | 7.414312 |
| Ti | -6.132855 | 2.064099  | 4.564953 |
| O  | -4.989334 | 3.199379  | 8.203822 |
| Ti | -3.178271 | 4.043827  | 7.739404 |
| O  | -3.566699 | 4.770333  | 6.081418 |
| O  | -4.968596 | 3.499768  | 4.097750 |
| Ti | -3.056369 | 4.107112  | 4.390962 |
| O  | -4.884522 | 0.815397  | 5.560533 |
| O  | -1.716961 | 5.329127  | 8.144185 |
| O  | -2.344960 | 2.397842  | 7.655117 |

|    |           |           |           |
|----|-----------|-----------|-----------|
| Ti | -1.790967 | 0.531440  | 7.627930  |
| O  | -6.861704 | 2.384257  | 6.220086  |
| O  | -1.619683 | 0.088463  | 5.859771  |
| O  | -2.191590 | 2.464831  | 4.413710  |
| Ti | -1.538004 | 0.696857  | 4.063564  |
| Ti | -5.282450 | -1.449442 | 7.348801  |
| O  | -6.533711 | -0.143258 | 7.894369  |
| O  | -3.334997 | -0.359689 | 3.790084  |
| O  | -4.404599 | -2.732993 | 3.755146  |
| O  | -5.908773 | -1.812903 | 5.631529  |
| Ti | -5.243700 | -0.852637 | 4.157126  |
| O  | -6.658511 | 0.404851  | 3.558239  |
| O  | -3.744703 | -0.171829 | 7.881619  |
| Ti | -0.087577 | -5.066700 | 4.615067  |
| O  | -0.468942 | -6.259221 | 6.020791  |
| Ti | -0.228754 | -4.930075 | 7.397754  |
| O  | 0.182700  | -3.713501 | 5.972101  |
| O  | -1.889491 | -4.516293 | 8.118804  |
| O  | -1.764055 | -4.300812 | 3.816747  |
| O  | -0.772996 | -1.510303 | 3.742541  |
| Ti | -2.457104 | -2.468872 | 4.300328  |
| O  | -2.715088 | -2.453278 | 6.134148  |
| O  | -0.921045 | -1.487592 | 8.121840  |
| Ti | -2.640208 | -2.784284 | 8.068367  |
| O  | -4.609323 | -2.904181 | 8.221860  |
| O  | 0.182370  | 1.096987  | 8.048393  |
| O  | 0.391435  | 1.107814  | 3.687527  |
| Ti | 3.364457  | -4.200293 | 4.450965  |
| O  | 3.431876  | -4.865457 | 6.212998  |
| O  | 4.990885  | -3.845587 | 8.196562  |
| Ti | 3.038733  | -4.181074 | 7.910833  |
| O  | 1.286066  | -5.192196 | 8.504962  |
| O  | 1.756594  | -5.335177 | 4.064432  |
| O  | 2.726155  | -2.488008 | 4.381197  |
| Ti | 1.304684  | -1.173306 | 3.966745  |
| O  | 1.016847  | -0.819183 | 5.821235  |
| O  | 2.197777  | -2.537229 | 7.956668  |
| Ti | 1.036696  | -0.991433 | 7.652021  |
| Ti | 1.719213  | 6.336072  | 13.698925 |
| O  | 1.615252  | 7.001664  | 11.923730 |
| O  | 0.013751  | 6.143192  | 9.845023  |
| Ti | 1.960692  | 6.458813  | 10.165297 |
| O  | 3.690135  | 7.444294  | 9.505821  |
| O  | 3.240761  | 7.595629  | 14.118860 |
| O  | 2.457552  | 4.639101  | 13.785469 |
| Ti | 3.573998  | 3.069946  | 13.818289 |
| O  | 3.818822  | 2.786555  | 11.996350 |
| O  | 2.724808  | 4.767708  | 10.028982 |
| Ti | 3.792349  | 3.173299  | 10.175434 |
| O  | 4.640931  | 1.046651  | 9.857741  |
| O  | 4.480496  | 0.905672  | 14.208443 |
| Ti | 5.104943  | 7.333040  | 13.455887 |

|    |           |           |           |
|----|-----------|-----------|-----------|
| O  | 5.497834  | 8.472532  | 11.998243 |
| Ti | 5.173687  | 7.121252  | 10.662285 |
| O  | 4.592829  | 6.002873  | 12.076233 |
| O  | 6.795855  | 6.566997  | 9.938433  |
| O  | 6.637352  | 6.360025  | 14.019507 |
| O  | 5.566937  | 3.576253  | 14.154211 |
| Ti | 7.263094  | 4.598028  | 13.643204 |
| O  | 7.568805  | 4.476784  | 11.816197 |
| O  | 5.743461  | 3.652749  | 9.797277  |
| Ti | 7.593475  | 4.846185  | 9.892471  |
| O  | 9.581688  | 4.957134  | 9.725837  |
| O  | 8.453600  | 2.449852  | 9.943778  |
| O  | 8.228027  | 2.404107  | 14.201809 |
| O  | 9.261240  | 4.787274  | 14.183756 |
| O  | 10.690873 | 3.694993  | 12.211558 |
| Ti | 10.098066 | 2.953485  | 13.826954 |
| O  | 11.547989 | 1.767808  | 14.502100 |
| Ti | 10.130352 | 3.369277  | 10.454983 |
| O  | 11.407548 | 1.916462  | 10.191780 |
| Ti | 10.791716 | 0.369195  | 10.971328 |
| Ti | 11.121160 | -0.032369 | 13.783124 |
| O  | 10.027562 | -0.974233 | 9.846214  |
| Ti | 8.142556  | -1.817949 | 10.325212 |
| O  | 8.528482  | -2.436158 | 12.037222 |
| O  | 9.929459  | -1.484843 | 14.204560 |
| Ti | 7.981577  | -2.003250 | 13.810523 |
| O  | 9.846369  | 1.002519  | 12.586709 |
| O  | 6.721056  | -3.113261 | 9.906199  |
| O  | 7.317663  | -0.179593 | 10.270804 |
| Ti | 6.597350  | 1.629487  | 10.249054 |
| O  | 12.026660 | -0.464813 | 12.198710 |
| O  | 6.463034  | 1.921407  | 12.069754 |
| O  | 7.126711  | -0.367335 | 13.788215 |
| Ti | 6.424197  | 1.406258  | 13.873931 |
| Ti | -4.265139 | 2.547345  | 13.093926 |
| Ti | -4.594179 | 2.949124  | 10.282008 |
| O  | -3.499900 | 3.890419  | 14.219329 |
| Ti | -1.614765 | 4.734134  | 13.740070 |
| O  | -2.000759 | 5.351671  | 12.028005 |
| O  | -3.402075 | 4.401004  | 9.860662  |
| Ti | -1.453977 | 4.919127  | 10.254499 |
| O  | -3.320164 | 1.913143  | 11.478297 |
| O  | -0.193118 | 6.029481  | 14.159276 |
| O  | -0.790577 | 3.095375  | 13.794567 |
| Ti | -0.072358 | 1.285589  | 13.815846 |
| O  | -5.499786 | 3.382009  | 11.866430 |
| O  | 0.061569  | 0.993799  | 11.995007 |
| O  | -0.600104 | 3.282411  | 10.276382 |
| Ti | 0.101127  | 1.508580  | 10.190989 |
| Ti | -3.605692 | -0.452786 | 13.610403 |
| O  | -4.882320 | 1.000435  | 13.873354 |
| O  | -1.702569 | 0.511094  | 9.863437  |

|    |           |           |           |
|----|-----------|-----------|-----------|
| O  | -2.736093 | -1.871641 | 9.881754  |
| O  | -4.166123 | -0.778808 | 11.853892 |
| Ti | -3.572808 | -0.037533 | 10.238355 |
| O  | -5.022801 | 1.147544  | 9.563335  |
| O  | -1.928682 | 0.466013  | 14.121296 |
| Ti | 1.422018  | -4.415894 | 10.610019 |
| O  | 1.029757  | -5.555248 | 12.067832 |
| Ti | 1.352962  | -4.203645 | 13.403842 |
| O  | 1.932218  | -3.084739 | 11.989305 |
| O  | -0.270439 | -3.651354 | 14.126575 |
| O  | -0.111769 | -3.445118 | 10.044468 |
| O  | 0.958348  | -0.661421 | 9.910480  |
| Ti | -0.737861 | -1.683306 | 10.421803 |
| O  | -1.043469 | -1.561709 | 12.248843 |
| O  | 0.781442  | -0.737710 | 14.267763 |
| Ti | -1.068764 | -1.931046 | 14.172483 |
| O  | -3.056946 | -2.041187 | 14.339319 |
| O  | 1.884240  | 1.868260  | 14.206944 |
| O  | 2.044936  | 2.009053  | 9.856422  |
| Ti | 4.808784  | -3.419563 | 10.366811 |
| O  | 4.912557  | -4.085002 | 12.141736 |
| O  | 6.513917  | -3.227439 | 14.220457 |
| Ti | 4.566971  | -3.542123 | 13.900332 |
| O  | 2.837248  | -4.526750 | 14.558778 |
| O  | 3.286299  | -4.678010 | 9.947423  |
| O  | 4.069856  | -1.722752 | 10.280488 |
| Ti | 2.951348  | -0.155128 | 10.246416 |
| O  | 2.705324  | 0.128668  | 12.068234 |
| O  | 3.802189  | -1.851364 | 14.035939 |
| Ti | 2.732693  | -0.258394 | 13.889133 |
| Ti | 3.163828  | 7.117371  | 19.615704 |
| O  | 3.097591  | 7.781686  | 17.853109 |
| O  | 1.536669  | 6.762162  | 15.869556 |
| Ti | 3.488858  | 7.097363  | 16.155137 |
| O  | 5.241704  | 8.109228  | 15.560680 |
| O  | 4.770472  | 8.253720  | 20.003095 |
| O  | 3.801096  | 5.404878  | 19.685492 |
| Ti | 5.221658  | 4.088759  | 20.098606 |
| O  | 5.507472  | 3.735377  | 18.243641 |
| O  | 4.329661  | 5.453376  | 16.108246 |
| Ti | 5.488313  | 3.905881  | 16.412799 |
| O  | 6.342940  | 1.817792  | 16.016614 |
| O  | 6.134598  | 1.806488  | 20.376824 |
| Ti | 6.614593  | 7.985722  | 19.452210 |
| O  | 6.996225  | 9.177871  | 18.046285 |
| Ti | 6.755200  | 7.848523  | 16.669843 |
| O  | 6.343278  | 6.632649  | 18.095803 |
| O  | 8.414274  | 7.432061  | 15.947925 |
| O  | 8.290398  | 7.217697  | 20.250268 |
| O  | 7.298863  | 4.425182  | 20.322545 |
| Ti | 8.982008  | 5.385752  | 19.765615 |
| O  | 9.239585  | 5.369471  | 17.931738 |

|    |           |           |           |
|----|-----------|-----------|-----------|
| O  | 7.446033  | 4.402549  | 15.943572 |
| Ti | 9.164722  | 5.699457  | 15.997539 |
| O  | 11.133776 | 5.820830  | 15.843959 |
| O  | 10.269743 | 3.088274  | 16.184492 |
| O  | 9.860440  | 3.275309  | 20.275412 |
| O  | 10.929489 | 5.648979  | 20.310444 |
| O  | 12.433509 | 4.729446  | 18.433857 |
| Ti | 11.768721 | 3.768936  | 19.907961 |
| O  | 13.183782 | 2.511887  | 20.507371 |
| Ti | 11.807551 | 4.366479  | 16.717091 |
| O  | 13.058857 | 3.060467  | 16.170950 |
| Ti | 12.099092 | 1.479309  | 16.650956 |
| Ti | 12.659137 | 0.852775  | 19.500271 |
| O  | 11.516902 | -0.282857 | 15.860686 |
| Ti | 9.706024  | -1.127872 | 16.325978 |
| O  | 10.095104 | -1.855272 | 17.983070 |
| O  | 11.496098 | -0.583465 | 19.967568 |
| Ti | 9.584511  | -1.192041 | 19.673546 |
| O  | 11.409873 | 2.100503  | 18.504989 |
| O  | 8.244739  | -2.412865 | 15.921066 |
| O  | 8.872207  | 0.517722  | 16.410631 |
| Ti | 8.316231  | 2.383770  | 16.437388 |
| O  | 13.388145 | 0.532964  | 17.844832 |
| O  | 8.143302  | 2.826068  | 18.205628 |
| O  | 8.718735  | 0.449720  | 19.650479 |
| Ti | 8.064088  | 2.217326  | 20.001694 |
| Ti | -2.631661 | 3.313286  | 19.153564 |
| Ti | -2.999948 | 3.550537  | 16.320490 |
| O  | -1.868856 | 4.481963  | 20.471580 |
| Ti | -0.050410 | 5.399655  | 19.865674 |
| O  | -0.481016 | 5.898067  | 18.120627 |
| O  | -1.883782 | 5.082903  | 15.839919 |
| Ti | 0.053847  | 5.552779  | 16.308093 |
| O  | -1.608227 | 2.717360  | 17.609576 |
| O  | 1.260480  | 6.817816  | 20.207505 |
| O  | 0.844767  | 3.815134  | 20.000955 |
| Ti | 1.665678  | 2.052960  | 19.956215 |
| O  | -3.892539 | 4.053992  | 17.914080 |
| O  | 2.122570  | 1.915172  | 18.161649 |
| O  | 0.964103  | 3.956472  | 16.316107 |
| Ti | 1.821690  | 2.246494  | 16.356204 |
| Ti | -1.873042 | 0.395418  | 19.873506 |
| O  | -3.197475 | 1.829494  | 20.057311 |
| O  | 0.053574  | 1.206854  | 16.090741 |
| O  | -1.055093 | -1.183634 | 16.081217 |
| O  | -2.427289 | -0.038012 | 18.133571 |
| Ti | -1.832319 | 0.673789  | 16.503242 |
| O  | -3.303108 | 1.740710  | 15.825704 |
| O  | -0.145533 | 1.221266  | 19.963393 |
| Ti | 3.049550  | -3.793056 | 16.682443 |
| O  | 2.633035  | -4.884624 | 18.181673 |
| Ti | 3.022120  | -3.519695 | 19.478719 |



|    |           |           |           |
|----|-----------|-----------|-----------|
| O  | 3.677685  | -2.473821 | 18.053434 |
| O  | 1.452084  | -2.848054 | 20.217053 |
| O  | 1.562617  | -2.742875 | 16.180091 |
| O  | 2.661524  | 0.073335  | 16.074371 |
| Ti | 0.937946  | -0.984953 | 16.541301 |
| O  | 0.774389  | -0.810966 | 18.373185 |
| O  | 2.520531  | 0.056090  | 20.432957 |
| Ti | 0.658709  | -1.117624 | 20.297475 |
| O  | -1.299774 | -1.199990 | 20.596309 |
| O  | 3.610988  | 2.722987  | 20.425593 |
| O  | 3.771243  | 2.741158  | 15.961298 |
| Ti | 6.340968  | -2.767123 | 16.395642 |
| O  | 6.480484  | -3.397129 | 18.175430 |
| O  | 8.087700  | -2.364381 | 20.143778 |
| Ti | 6.161418  | -2.763602 | 19.909813 |
| O  | 4.510140  | -3.821957 | 20.662372 |
| O  | 4.871371  | -4.077603 | 15.947519 |
| O  | 5.636891  | -1.046563 | 16.300495 |
| Ti | 4.657810  | 0.594042  | 16.368257 |
| O  | 4.587865  | 0.921039  | 18.193823 |
| O  | 5.359369  | -1.094386 | 20.124889 |
| Ti | 4.487536  | 0.616832  | 20.018322 |
| Ti | 4.954074  | 7.280779  | 25.864119 |
| O  | 4.841574  | 7.337503  | 23.962106 |
| O  | 3.099610  | 7.655770  | 21.759829 |
| Ti | 5.033530  | 7.524054  | 22.095839 |
| O  | 6.640394  | 8.632396  | 21.585889 |
| O  | 6.396481  | 8.513785  | 25.949987 |
| O  | 5.869561  | 5.915139  | 26.784003 |
| Ti | 6.838242  | 4.375134  | 26.264986 |
| O  | 6.730338  | 4.426077  | 24.433121 |
| O  | 5.699082  | 5.841473  | 21.535415 |
| Ti | 7.159253  | 4.764190  | 22.567030 |
| O  | 7.935782  | 2.719035  | 22.145643 |
| O  | 7.692890  | 2.496265  | 26.932095 |
| Ti | 7.953993  | 8.003751  | 25.060976 |
| O  | 8.452599  | 9.238284  | 23.757998 |
| Ti | 8.397018  | 8.048018  | 22.254929 |
| O  | 7.689232  | 6.667665  | 23.570817 |
| O  | 10.276976 | 7.994678  | 22.030785 |
| O  | 9.328148  | 7.460139  | 26.153640 |
| O  | 8.789752  | 4.787249  | 26.527500 |
| Ti | 10.363417 | 5.856177  | 25.943777 |
| O  | 10.771410 | 5.820058  | 24.145804 |
| O  | 9.151904  | 5.148183  | 22.167165 |
| Ti | 11.063140 | 6.318796  | 22.212812 |
| O  | 13.005798 | 6.521460  | 22.295158 |
| O  | 11.799618 | 4.045836  | 22.215359 |
| O  | 11.199961 | 3.661320  | 26.266032 |
| O  | 12.037065 | 6.025822  | 26.924437 |
| O  | 13.816560 | 5.098239  | 24.810132 |
| Ti | 12.910834 | 4.473597  | 26.311620 |

|    |           |           |           |
|----|-----------|-----------|-----------|
| O  | 13.944381 | 2.896785  | 26.622014 |
| Ti | 13.484275 | 4.880696  | 22.983633 |
| O  | 14.682039 | 3.629576  | 22.333202 |
| Ti | 13.809983 | 1.907382  | 22.561731 |
| Ti | 13.604283 | 1.529452  | 25.374829 |
| O  | 13.188079 | 0.289824  | 21.621471 |
| Ti | 11.313426 | -0.278924 | 22.153271 |
| O  | 11.362732 | -0.773632 | 23.977750 |
| O  | 12.879853 | 0.032998  | 26.199085 |
| Ti | 11.077643 | -0.499965 | 25.813220 |
| O  | 12.484050 | 2.286557  | 23.968574 |
| O  | 9.972548  | -1.674874 | 21.735524 |
| O  | 10.441437 | 1.333944  | 22.066950 |
| Ti | 9.968546  | 3.165783  | 22.524614 |
| O  | 14.853652 | 1.163793  | 23.996480 |
| O  | 9.309418  | 2.873798  | 24.274439 |
| O  | 10.178294 | 1.018475  | 26.409023 |
| Ti | 9.462471  | 2.733522  | 26.092639 |
| Ti | -0.585293 | 4.139703  | 25.329185 |
| Ti | -1.227391 | 4.058254  | 22.501997 |
| O  | 0.348215  | 5.560516  | 26.077980 |
| Ti | 2.007682  | 6.397531  | 25.612348 |
| O  | 1.447420  | 7.124219  | 23.998214 |
| O  | -0.190162 | 5.659335  | 22.016861 |
| Ti | 1.692896  | 6.362319  | 22.291006 |
| O  | 0.302183  | 3.382463  | 23.763074 |
| O  | 3.177621  | 7.632493  | 26.447431 |
| O  | 3.227905  | 4.979814  | 25.623955 |
| Ti | 3.576619  | 3.122634  | 26.002509 |
| O  | -2.035669 | 4.571793  | 24.126352 |
| O  | 3.641246  | 2.446340  | 24.306697 |
| O  | 2.669967  | 4.792037  | 22.496291 |
| Ti | 3.466208  | 3.052578  | 22.515435 |
| Ti | 0.464274  | 1.379337  | 26.397046 |
| O  | -0.883437 | 2.775069  | 26.554926 |
| O  | 1.787660  | 1.913119  | 22.215352 |
| O  | 0.689424  | -0.436979 | 22.276332 |
| O  | -0.200614 | 0.760893  | 24.756756 |
| Ti | 0.044311  | 1.307146  | 22.964691 |
| O  | -1.455214 | 2.155307  | 22.153292 |
| O  | 1.881153  | 2.597500  | 26.652995 |
| Ti | 4.797827  | -3.085253 | 22.722614 |
| O  | 4.569393  | -4.217996 | 24.227892 |
| Ti | 5.119351  | -2.887574 | 25.492555 |
| O  | 5.414117  | -1.713395 | 24.063372 |
| O  | 3.731555  | -2.177349 | 26.535427 |
| O  | 3.223045  | -2.098375 | 22.325539 |
| O  | 4.407977  | 0.801275  | 22.241264 |
| Ti | 2.753490  | -0.309392 | 22.600904 |
| O  | 2.609852  | -0.160906 | 24.502349 |
| O  | 4.374324  | 0.748027  | 26.772550 |
| Ti | 3.016659  | -0.447834 | 26.298242 |

|    |          |           |           |
|----|----------|-----------|-----------|
| O  | 1.347279 | -0.083654 | 27.179683 |
| O  | 5.288549 | 3.184272  | 26.871634 |
| O  | 5.419923 | 3.495160  | 22.264507 |
| Ti | 8.056870 | -1.835166 | 22.291675 |
| O  | 8.389098 | -2.132955 | 24.126708 |
| O  | 9.915177 | -1.817336 | 26.501083 |
| Ti | 8.093787 | -1.883348 | 25.955530 |
| O  | 6.747798 | -3.176658 | 26.367900 |
| O  | 6.615982 | -3.210552 | 21.981560 |
| O  | 7.373839 | -0.116911 | 22.204053 |
| Ti | 6.331907 | 1.447331  | 22.579660 |
| O  | 6.323726 | 1.448529  | 24.472758 |
| O  | 7.224768 | -0.338631 | 26.583428 |
| Ti | 6.233332 | 1.255815  | 26.310523 |

48c-like 3-D (1,0,4)-mer

|    |           |           |           |
|----|-----------|-----------|-----------|
| Ti | -1.574205 | 4.815697  | 1.869142  |
| O  | -1.944060 | 5.264162  | 0.077616  |
| O  | -3.472673 | 4.847261  | -2.280307 |
| Ti | -1.646743 | 4.936177  | -1.740121 |
| O  | -0.300508 | 6.198297  | -2.255412 |
| O  | -0.121249 | 6.195081  | 2.162557  |
| O  | -0.872001 | 3.095066  | 1.820348  |
| Ti | 0.122687  | 1.497344  | 1.489194  |
| O  | 0.291883  | 1.481909  | -0.389320 |
| O  | -0.854432 | 3.334436  | -2.287666 |
| Ti | 0.266405  | 1.789540  | -2.218081 |
| O  | 1.298587  | -0.118138 | -2.767611 |
| O  | 1.090385  | -0.587576 | 1.760269  |
| Ti | 1.668320  | 6.081483  | 1.358388  |
| O  | 1.880687  | 7.253599  | -0.117372 |
| Ti | 1.348178  | 5.940566  | -1.409773 |
| O  | 1.050468  | 4.738962  | -0.002173 |
| O  | 2.782956  | 5.284673  | -2.423126 |
| O  | 3.232202  | 5.048950  | 1.715988  |
| O  | 2.084371  | 2.089525  | 1.798548  |
| Ti | 3.688289  | 3.266797  | 1.415622  |
| O  | 3.743650  | 3.087317  | -0.490566 |
| O  | 1.940729  | 2.503749  | -2.880706 |
| Ti | 3.373625  | 3.490834  | -2.270396 |
| O  | 5.024972  | 2.948545  | -3.126439 |
| O  | 4.548036  | 0.177244  | -2.688232 |
| O  | 4.712245  | 0.969711  | 1.835392  |
| O  | 5.734308  | 3.404522  | 1.668412  |
| O  | 6.568039  | 2.094853  | -0.697509 |
| Ti | 6.415821  | 1.644235  | 1.127082  |
| O  | 8.043100  | 0.889187  | 1.996953  |
| Ti | 5.873645  | 1.487699  | -2.341958 |
| O  | 7.314296  | 0.139836  | -2.420730 |
| Ti | 7.165609  | -1.198095 | -1.165419 |
| Ti | 7.829010  | -1.067054 | 1.664570  |
| O  | 6.211379  | -2.630263 | -1.888775 |

|    |           |           |           |
|----|-----------|-----------|-----------|
| Ti | 4.620081  | -3.565430 | -1.430001 |
| O  | 5.182333  | -4.245889 | 0.185170  |
| O  | 6.761456  | -2.669065 | 2.112311  |
| Ti | 4.877806  | -3.398179 | 1.859921  |
| O  | 6.294445  | -0.444906 | 0.416244  |
| O  | 3.493334  | -4.745913 | -2.355613 |
| O  | 3.212793  | -2.250266 | -1.422064 |
| Ti | 2.947523  | -0.401452 | -1.904747 |
| O  | 8.642823  | -1.564594 | 0.036433  |
| O  | 2.998314  | 0.458999  | -0.300642 |
| O  | 3.883049  | -1.857818 | 1.582008  |
| Ti | 3.010585  | -0.132426 | 1.506339  |
| Ti | -7.220358 | 0.950829  | 1.603826  |
| Ti | -7.029998 | 1.399551  | -1.201059 |
| O  | -6.617420 | 2.564298  | 2.581896  |
| Ti | -4.773042 | 3.183728  | 2.051505  |
| O  | -4.827045 | 3.705370  | 0.231314  |
| O  | -6.379735 | 2.944679  | -1.996447 |
| Ti | -4.577382 | 3.476676  | -1.616295 |
| O  | -5.869170 | 0.657203  | 0.181344  |
| O  | -3.467821 | 4.609119  | 2.493729  |
| O  | -3.862981 | 1.589231  | 2.068734  |
| Ti | -3.484691 | -0.237423 | 1.528853  |
| O  | -8.281033 | 1.704706  | 0.183422  |
| O  | -2.766526 | 0.085885  | -0.204798 |
| O  | -3.681056 | 1.973752  | -2.274216 |
| Ti | -2.918222 | 0.270922  | -2.015916 |
| Ti | -6.953272 | -2.035267 | 1.071310  |
| O  | -8.122603 | -0.777543 | 1.748163  |
| O  | -4.632327 | -0.698616 | -2.198958 |
| O  | -5.451764 | -3.053921 | -2.903609 |
| O  | -7.250920 | -2.191775 | -0.763965 |
| Ti | -6.335144 | -1.525647 | -2.245420 |
| O  | -7.367736 | 0.060396  | -2.485142 |
| O  | -5.288209 | -1.173548 | 1.844024  |
| Ti | -1.318126 | -5.010925 | -1.072226 |
| O  | -1.781969 | -6.295996 | 0.201042  |
| Ti | -1.785093 | -5.148568 | 1.735622  |
| O  | -1.107072 | -3.714136 | 0.461689  |
| O  | -3.663994 | -5.104316 | 1.939721  |
| O  | -2.708934 | -4.472200 | -2.146996 |
| O  | -2.224114 | -1.787464 | -2.505689 |
| Ti | -3.773481 | -2.888296 | -1.924206 |
| O  | -4.200517 | -2.897997 | -0.131507 |
| O  | -2.634019 | -2.209701 | 1.852693  |
| Ti | -4.483204 | -3.436920 | 1.793116  |
| O  | -6.426802 | -3.678960 | 1.711728  |
| O  | -1.434695 | 0.201939  | 1.926423  |
| O  | -1.147798 | 0.509444  | -2.867341 |
| Ti | 1.733245  | -4.171978 | -1.789795 |
| O  | 1.786355  | -4.372694 | 0.118532  |
| O  | 3.485753  | -4.712743 | 2.353531  |

|    |           |           |           |
|----|-----------|-----------|-----------|
| Ti | 1.552792  | -4.584315 | 1.969448  |
| O  | -0.042640 | -5.722083 | 2.444207  |
| O  | 0.270897  | -5.394315 | -1.950834 |
| O  | 0.774910  | -2.831686 | -2.758137 |
| Ti | -0.286132 | -1.363186 | -2.227139 |
| O  | -0.184779 | -1.465294 | -0.401725 |
| O  | 0.840176  | -2.918189 | 2.519284  |
| Ti | -0.640471 | -1.837633 | 1.470532  |
| Ti | 0.203093  | 5.672730  | 7.702834  |
| O  | 0.068147  | 6.330897  | 5.931283  |
| O  | -1.514043 | 5.247949  | 4.019723  |
| Ti | 0.409413  | 5.709669  | 4.197683  |
| O  | 2.032153  | 6.794521  | 3.403111  |
| O  | 1.711043  | 6.999701  | 8.089344  |
| O  | 0.913123  | 3.955210  | 7.778716  |
| Ti | 1.853588  | 2.288882  | 7.654680  |
| O  | 1.861968  | 1.993525  | 5.825182  |
| O  | 1.191898  | 4.034441  | 3.904391  |
| Ti | 2.004639  | 2.306972  | 4.003870  |
| O  | 2.888007  | 0.168881  | 3.609262  |
| O  | 2.746680  | 0.168989  | 8.051180  |
| Ti | 3.515861  | 6.718639  | 7.337391  |
| O  | 3.954990  | 7.802672  | 5.835105  |
| Ti | 3.544241  | 6.446197  | 4.541009  |
| O  | 2.854749  | 5.411257  | 5.951469  |
| O  | 5.099836  | 5.719002  | 3.812961  |
| O  | 4.995632  | 5.626378  | 7.787950  |
| O  | 3.841925  | 2.836899  | 7.922568  |
| Ti | 5.571196  | 3.860114  | 7.468674  |
| O  | 5.832527  | 3.675159  | 5.629165  |
| O  | 3.975521  | 2.853962  | 3.578844  |
| Ti | 5.850112  | 3.970851  | 3.720836  |
| O  | 7.810266  | 3.987115  | 3.217319  |
| O  | 6.589587  | 1.655354  | 3.915867  |
| O  | 6.462199  | 1.690923  | 7.885804  |
| O  | 7.614168  | 4.032139  | 7.871547  |
| O  | 8.928281  | 2.808764  | 5.577456  |
| Ti | 8.286353  | 2.276905  | 7.223763  |
| O  | 9.729644  | 1.464051  | 8.312579  |
| Ti | 8.386181  | 2.344370  | 3.780293  |
| O  | 9.837441  | 0.943326  | 3.961752  |
| Ti | 9.308186  | -0.437333 | 4.983971  |
| Ti | 9.554943  | -0.449279 | 7.869923  |
| O  | 8.482715  | -1.572119 | 3.657747  |
| Ti | 6.641595  | -2.467423 | 4.259536  |
| O  | 7.134682  | -3.025797 | 5.967650  |
| O  | 8.438287  | -2.042739 | 8.208730  |
| Ti | 6.541049  | -2.625267 | 7.747104  |
| O  | 8.186322  | 0.218657  | 6.453375  |
| O  | 5.295763  | -3.853914 | 3.931589  |
| O  | 5.734746  | -0.889876 | 4.164882  |
| Ti | 4.788889  | 0.814715  | 4.078089  |

|    |           |           |          |
|----|-----------|-----------|----------|
| O  | 10.551073 | -0.979157 | 6.351338 |
| O  | 4.353200  | 1.063492  | 5.856911 |
| O  | 5.556971  | -1.069415 | 7.642552 |
| Ti | 4.703462  | 0.639720  | 7.641934 |
| Ti | -5.593605 | 1.379857  | 7.641450 |
| Ti | -6.068599 | 1.937494  | 4.714465 |
| O  | -4.894981 | 3.103613  | 8.401694 |
| Ti | -3.161447 | 3.965673  | 7.869578 |
| O  | -3.544407 | 4.731782  | 6.207803 |
| O  | -4.880794 | 3.341380  | 4.260125 |
| Ti | -3.005649 | 4.080627  | 4.530062 |
| O  | -4.954869 | 0.569853  | 5.713840 |
| O  | -1.692173 | 5.301470  | 8.226888 |
| O  | -2.214718 | 2.408626  | 7.650355 |
| Ti | -1.823006 | 0.502771  | 7.619903 |
| O  | -6.773235 | 2.344491  | 6.357353 |
| O  | -1.762020 | -0.006569 | 5.851157 |
| O  | -2.124610 | 2.438572  | 4.467794 |
| Ti | -1.572228 | 0.652154  | 4.079763 |
| Ti | -5.297367 | -1.411834 | 7.264303 |
| O  | -6.590836 | -0.235794 | 7.961698 |
| O  | -3.378621 | -0.407645 | 3.783951 |
| O  | -4.384008 | -2.815870 | 3.716667 |
| O  | -5.956527 | -1.968462 | 5.599123 |
| Ti | -5.265728 | -0.973998 | 4.167388 |
| O  | -6.656261 | 0.328785  | 3.627141 |
| O  | -3.811026 | -0.035257 | 7.933563 |
| Ti | -0.062918 | -5.052567 | 4.581537 |
| O  | -0.423710 | -6.246649 | 5.996430 |
| Ti | -0.174292 | -4.919155 | 7.367178 |
| O  | 0.202432  | -3.694497 | 5.940361 |
| O  | -1.791896 | -4.545404 | 8.173308 |
| O  | -1.722420 | -4.311316 | 3.748259 |
| O  | -0.780575 | -1.524839 | 3.714768 |
| Ti | -2.456831 | -2.501907 | 4.286174 |
| O  | -2.669623 | -2.546976 | 6.110909 |
| O  | -0.919775 | -1.494678 | 8.057674 |
| Ti | -2.561426 | -2.813862 | 8.074066 |
| O  | -4.528248 | -2.806237 | 8.167114 |
| O  | 0.158332  | 1.103377  | 8.034365 |
| O  | 0.360505  | 1.099753  | 3.663099 |
| Ti | 3.375484  | -4.168988 | 4.485893 |
| O  | 3.440286  | -4.859130 | 6.240002 |
| O  | 5.046422  | -3.830625 | 8.204645 |
| Ti | 3.095191  | -4.138277 | 7.930422 |
| O  | 1.278872  | -5.089270 | 8.557607 |
| O  | 1.790420  | -5.316812 | 4.070584 |
| O  | 2.730859  | -2.463755 | 4.389451 |
| Ti | 1.277819  | -1.172791 | 3.958088 |
| O  | 0.988141  | -0.792810 | 5.797806 |
| O  | 2.246222  | -2.508447 | 7.924978 |
| Ti | 1.007771  | -1.011695 | 7.635330 |

|    |           |           |           |
|----|-----------|-----------|-----------|
| Ti | 1.876568  | 6.400504  | 13.644620 |
| O  | 1.765547  | 7.087846  | 11.871430 |
| O  | 0.117417  | 6.120454  | 9.844817  |
| Ti | 2.056416  | 6.489524  | 10.130522 |
| O  | 3.820164  | 7.408456  | 9.445563  |
| O  | 3.377314  | 7.654595  | 14.095023 |
| O  | 2.557453  | 4.670670  | 13.726568 |
| Ti | 3.549981  | 3.029616  | 13.733405 |
| O  | 3.784253  | 2.740912  | 11.916411 |
| O  | 2.809449  | 4.786795  | 9.988229  |
| Ti | 3.790665  | 3.151806  | 10.105031 |
| O  | 4.602500  | 1.015336  | 9.760953  |
| O  | 4.435093  | 0.888374  | 14.208578 |
| Ti | 5.225330  | 7.334302  | 13.414997 |
| O  | 5.660781  | 8.413281  | 11.921235 |
| Ti | 5.294634  | 7.037854  | 10.615952 |
| O  | 4.671047  | 5.984396  | 12.070677 |
| O  | 6.888998  | 6.409282  | 9.893648  |
| O  | 6.741269  | 6.346740  | 14.011660 |
| O  | 5.578198  | 3.526169  | 14.073553 |
| Ti | 7.275307  | 4.553177  | 13.580352 |
| O  | 7.500820  | 4.420121  | 11.770896 |
| O  | 5.762546  | 3.581537  | 9.700041  |
| Ti | 7.694202  | 4.671583  | 9.834741  |
| O  | 9.669204  | 4.657522  | 9.548101  |
| O  | 8.351010  | 2.361454  | 10.205962 |
| O  | 8.199241  | 2.364847  | 14.190659 |
| O  | 9.294143  | 4.687652  | 14.023946 |
| O  | 10.656197 | 3.356441  | 11.990195 |
| Ti | 10.097947 | 2.824121  | 13.687885 |
| O  | 11.545575 | 1.676677  | 14.472485 |
| Ti | 10.167329 | 2.995025  | 10.170361 |
| O  | 11.558491 | 1.548967  | 10.186167 |
| Ti | 10.947101 | 0.128364  | 11.121171 |
| Ti | 11.145583 | -0.177726 | 13.923146 |
| O  | 10.088577 | -1.020326 | 9.859487  |
| Ti | 8.165976  | -1.833028 | 10.329361 |
| O  | 8.525116  | -2.404045 | 12.066963 |
| O  | 9.916244  | -1.603476 | 14.355005 |
| Ti | 7.982589  | -2.049373 | 13.871451 |
| O  | 9.881065  | 0.760878  | 12.636306 |
| O  | 6.795794  | -3.160209 | 9.883336  |
| O  | 7.329025  | -0.219426 | 10.164972 |
| Ti | 6.550548  | 1.574110  | 10.220163 |
| O  | 12.118775 | -0.699968 | 12.394580 |
| O  | 6.207035  | 1.667006  | 12.046461 |
| O  | 7.167025  | -0.395324 | 13.889930 |
| Ti | 6.415929  | 1.355958  | 13.869363 |
| Ti | -3.855461 | 2.109923  | 13.432643 |
| Ti | -4.449564 | 2.789689  | 10.585230 |
| O  | -3.266222 | 3.953685  | 14.100234 |
| Ti | -1.468792 | 4.790222  | 13.618086 |

|    |           |           |           |
|----|-----------|-----------|-----------|
| O  | -1.871843 | 5.578311  | 11.982128 |
| O  | -3.262917 | 4.216346  | 10.015186 |
| Ti | -1.370631 | 4.909881  | 10.295229 |
| O  | -3.177313 | 1.545907  | 11.525614 |
| O  | -0.032403 | 6.092850  | 14.074553 |
| O  | -0.607450 | 3.144899  | 13.493347 |
| Ti | -0.146012 | 1.261940  | 13.629851 |
| O  | -5.126557 | 3.138372  | 12.240768 |
| O  | -0.100125 | 0.545356  | 11.852102 |
| O  | -0.505438 | 3.253261  | 10.454379 |
| Ti | 0.091815  | 1.493012  | 10.144634 |
| Ti | -3.499753 | -0.801789 | 13.352578 |
| O  | -4.794298 | 0.541276  | 13.848859 |
| O  | -1.735264 | 0.472950  | 9.806390  |
| O  | -2.647159 | -1.896012 | 9.856520  |
| O  | -4.317590 | -1.140686 | 11.680825 |
| Ti | -3.672913 | -0.131512 | 10.244525 |
| O  | -5.161348 | 1.109564  | 9.758829  |
| O  | -2.083720 | 0.696032  | 13.960322 |
| Ti | 1.443057  | -4.321127 | 10.632360 |
| O  | 1.036033  | -5.539925 | 12.031275 |
| Ti | 1.371410  | -4.264492 | 13.423952 |
| O  | 2.038434  | -3.093127 | 12.121773 |
| O  | -0.291584 | -3.731319 | 14.108680 |
| O  | 0.002110  | -3.166033 | 10.295696 |
| O  | 0.982926  | -0.656519 | 9.851384  |
| Ti | -0.779483 | -1.435079 | 10.618050 |
| O  | -1.492843 | -1.481208 | 12.438820 |
| O  | 0.698236  | -0.755134 | 14.207234 |
| Ti | -1.059990 | -2.034424 | 14.298677 |
| O  | -3.023005 | -2.122770 | 14.542864 |
| O  | 1.823427  | 1.848318  | 14.053886 |
| O  | 2.019508  | 2.004868  | 9.840460  |
| Ti | 4.873003  | -3.411547 | 10.381513 |
| O  | 4.963356  | -4.059224 | 12.155770 |
| O  | 6.481466  | -3.235309 | 14.258519 |
| Ti | 4.529266  | -3.531211 | 13.914173 |
| O  | 2.836959  | -4.583515 | 14.589280 |
| O  | 3.312346  | -4.615295 | 9.960368  |
| O  | 4.144903  | -1.711447 | 10.280336 |
| Ti | 2.960621  | -0.191516 | 10.192782 |
| O  | 2.633917  | 0.087052  | 12.012874 |
| O  | 3.777173  | -1.834804 | 14.066285 |
| Ti | 2.681937  | -0.266564 | 13.838456 |
| Ti | 3.285775  | 7.057215  | 19.700306 |
| O  | 3.195768  | 7.705304  | 17.925981 |
| O  | 1.677715  | 6.880560  | 15.823525 |
| Ti | 3.630090  | 7.176909  | 16.167611 |
| O  | 5.322321  | 8.229592  | 15.491943 |
| O  | 4.846364  | 8.260940  | 20.121994 |
| O  | 4.012559  | 5.357255  | 19.801259 |
| Ti | 5.195980  | 3.835676  | 19.888840 |



|    |           |           |           |
|----|-----------|-----------|-----------|
| O  | 5.522949  | 3.558072  | 18.068610 |
| O  | 4.381457  | 5.480441  | 16.014903 |
| Ti | 5.475223  | 3.911151  | 16.242948 |
| O  | 6.333895  | 1.796377  | 16.027724 |
| O  | 6.137141  | 1.639365  | 20.240933 |
| Ti | 6.715421  | 7.966608  | 19.449663 |
| O  | 7.123134  | 9.185601  | 18.050736 |
| Ti | 6.787105  | 7.910776  | 16.657905 |
| O  | 6.118991  | 6.739718  | 17.959357 |
| O  | 8.449090  | 7.376421  | 15.971007 |
| O  | 8.154989  | 6.810146  | 19.785644 |
| O  | 7.173769  | 4.300752  | 20.230341 |
| Ti | 8.936011  | 5.078924  | 19.462875 |
| O  | 9.649482  | 5.126061  | 17.642065 |
| O  | 7.459142  | 4.399786  | 15.873786 |
| Ti | 9.217099  | 5.679049  | 15.782066 |
| O  | 11.180060 | 5.767748  | 15.538377 |
| O  | 10.240953 | 2.948568  | 16.122597 |
| O  | 9.892046  | 3.171527  | 20.275539 |
| O  | 10.803421 | 5.540376  | 20.224776 |
| O  | 12.474268 | 4.785966  | 18.401073 |
| Ti | 11.829705 | 3.776392  | 19.837055 |
| O  | 13.318120 | 2.535704  | 20.323563 |
| Ti | 11.656557 | 4.447169  | 16.728898 |
| O  | 12.951398 | 3.104164  | 16.232918 |
| Ti | 12.012395 | 1.535894  | 16.649095 |
| Ti | 12.607539 | 0.855746  | 19.496649 |
| O  | 11.424711 | -0.308464 | 15.981732 |
| Ti | 9.627354  | -1.144795 | 16.464028 |
| O  | 10.030489 | -1.933326 | 18.099929 |
| O  | 11.421628 | -0.571525 | 20.066804 |
| Ti | 9.529422  | -1.264418 | 19.786596 |
| O  | 11.334395 | 2.099109  | 18.556623 |
| O  | 8.191191  | -2.447438 | 16.007478 |
| O  | 8.765239  | 0.500010  | 16.588573 |
| Ti | 8.303432  | 2.382973  | 16.451701 |
| O  | 13.283886 | 0.507520  | 17.840985 |
| O  | 8.256741  | 3.099707  | 18.229704 |
| O  | 8.663265  | 0.391540  | 19.627083 |
| Ti | 8.064849  | 2.151405  | 19.937029 |
| Ti | -2.787562 | 3.515478  | 18.961111 |
| Ti | -2.987055 | 3.822703  | 16.159057 |
| O  | -1.929784 | 4.665083  | 20.221617 |
| Ti | -0.007256 | 5.478701  | 19.752758 |
| O  | -0.366288 | 6.049284  | 18.014902 |
| O  | -1.757463 | 5.248250  | 15.727081 |
| Ti | 0.176344  | 5.694756  | 16.210398 |
| O  | -1.722949 | 2.882375  | 17.445051 |
| O  | 1.363161  | 6.806223  | 20.198304 |
| O  | 0.829239  | 3.864884  | 19.916670 |
| Ti | 1.605177  | 2.070133  | 19.861646 |
| O  | -3.959266 | 4.344709  | 17.688273 |

|    |           |           |           |
|----|-----------|-----------|-----------|
| O  | 1.947767  | 1.976161  | 18.035093 |
| O  | 0.991244  | 4.040433  | 16.191679 |
| Ti | 1.741243  | 2.288523  | 16.212286 |
| Ti | -2.010898 | 0.647653  | 19.908499 |
| O  | -3.400493 | 2.094345  | 19.894905 |
| O  | -0.042120 | 1.279834  | 15.890526 |
| O  | -1.136172 | -1.043271 | 16.057088 |
| O  | -2.499720 | 0.286146  | 18.088908 |
| Ti | -1.940929 | 0.820392  | 16.391800 |
| O  | -3.389141 | 1.969050  | 15.609060 |
| O  | -0.195884 | 1.283793  | 19.875116 |
| Ti | 2.933487  | -3.688415 | 16.666534 |
| O  | 2.498531  | -4.767514 | 18.160026 |
| Ti | 2.864022  | -3.392074 | 19.465612 |
| O  | 3.486140  | -2.337689 | 18.010477 |
| O  | 1.268339  | -2.765253 | 20.187914 |
| O  | 1.416687  | -2.702235 | 16.068978 |
| O  | 2.579082  | 0.118126  | 16.007889 |
| Ti | 0.882176  | -0.908932 | 16.501253 |
| O  | 0.656026  | -0.776244 | 18.310723 |
| O  | 2.393837  | 0.062577  | 20.381040 |
| Ti | 0.462549  | -1.028082 | 20.246899 |
| O  | -1.512397 | -1.013986 | 20.532085 |
| O  | 3.553944  | 2.628938  | 20.320104 |
| O  | 3.721805  | 2.756376  | 15.873498 |
| Ti | 6.282358  | -2.754908 | 16.437473 |
| O  | 6.393214  | -3.442275 | 18.210539 |
| O  | 8.041537  | -2.475299 | 20.237176 |
| Ti | 6.102727  | -2.843846 | 19.951284 |
| O  | 4.338382  | -3.762263 | 20.635653 |
| O  | 4.781460  | -4.008514 | 15.986961 |
| O  | 5.600814  | -1.025092 | 16.355752 |
| Ti | 4.607230  | 0.615082  | 16.348425 |
| O  | 4.371842  | 0.904570  | 18.165096 |
| O  | 5.348726  | -1.141319 | 20.093068 |
| Ti | 4.365521  | 0.492553  | 19.976212 |
| Ti | 4.782710  | 7.814900  | 25.596722 |
| O  | 4.718014  | 8.505644  | 23.842317 |
| O  | 3.112242  | 7.476505  | 21.877481 |
| Ti | 5.063589  | 7.783402  | 22.151924 |
| O  | 6.879756  | 8.734509  | 21.524547 |
| O  | 6.368033  | 8.962215  | 26.012073 |
| O  | 5.426512  | 6.109256  | 25.692829 |
| Ti | 6.879419  | 4.817811  | 26.123630 |
| O  | 7.168504  | 4.437751  | 24.283891 |
| O  | 5.911479  | 6.153626  | 22.157239 |
| Ti | 7.149049  | 4.655933  | 22.446262 |
| O  | 7.998451  | 2.540907  | 22.047336 |
| O  | 7.796728  | 2.544409  | 26.418297 |
| Ti | 8.221306  | 8.698297  | 25.501098 |
| O  | 8.582810  | 9.892094  | 24.085856 |
| Ti | 8.332717  | 8.564723  | 22.715460 |

|    |           |           |           |
|----|-----------|-----------|-----------|
| O  | 7.955435  | 7.340156  | 24.142071 |
| O  | 9.949136  | 8.190509  | 21.907574 |
| O  | 9.880625  | 7.956036  | 26.333557 |
| O  | 8.937938  | 5.169360  | 26.366886 |
| Ti | 10.614064 | 6.146412  | 25.795254 |
| O  | 10.826798 | 6.191935  | 23.970391 |
| O  | 9.076578  | 5.139318  | 22.024234 |
| Ti | 10.717820 | 6.458496  | 22.007099 |
| O  | 12.684995 | 6.452653  | 21.913064 |
| O  | 11.967768 | 3.680987  | 22.148815 |
| O  | 11.535310 | 4.052253  | 26.297041 |
| O  | 12.541667 | 6.460126  | 26.364422 |
| O  | 14.112421 | 5.612757  | 24.481797 |
| Ti | 13.422744 | 4.617775  | 25.913863 |
| O  | 14.813810 | 3.315355  | 26.454561 |
| Ti | 13.453716 | 5.057894  | 22.816445 |
| O  | 14.747052 | 3.881454  | 22.120117 |
| Ti | 13.750991 | 2.265539  | 22.441296 |
| Ti | 14.227750 | 1.707104  | 25.367535 |
| O  | 13.053435 | 0.541675  | 21.680343 |
| Ti | 11.320174 | -0.320756 | 22.212539 |
| O  | 11.703661 | -1.086551 | 23.874039 |
| O  | 13.041125 | 0.302426  | 25.822254 |
| Ti | 11.165784 | -0.435042 | 25.552259 |
| O  | 13.111959 | 3.073011  | 24.368954 |
| O  | 9.850610  | -1.655716 | 21.855205 |
| O  | 10.372772 | 1.236133  | 22.431464 |
| Ti | 9.979830  | 3.141625  | 22.461782 |
| O  | 14.932213 | 1.300898  | 23.724265 |
| O  | 9.917923  | 3.651064  | 24.230639 |
| O  | 10.283604 | 1.206251  | 25.614032 |
| Ti | 9.729120  | 2.992358  | 26.001779 |
| Ti | -1.149812 | 4.083412  | 25.098407 |
| Ti | -1.396555 | 4.095780  | 22.212627 |
| O  | -0.323855 | 5.217911  | 26.424794 |
| Ti | 1.517245  | 6.113059  | 25.823277 |
| O  | 1.025292  | 6.670806  | 24.114635 |
| O  | -0.279695 | 5.689317  | 21.873032 |
| Ti | 1.617926  | 6.271025  | 22.334673 |
| O  | -0.028182 | 3.427204  | 23.629189 |
| O  | 2.862489  | 7.500391  | 26.151744 |
| O  | 2.424293  | 4.535648  | 25.918316 |
| Ti | 3.368614  | 2.830159  | 26.003507 |
| O  | -2.392430 | 4.626253  | 23.731346 |
| O  | 3.802014  | 2.581271  | 24.224414 |
| O  | 2.600770  | 4.714550  | 22.438001 |
| Ti | 3.453110  | 3.004783  | 22.439069 |
| Ti | -0.229060 | 1.301252  | 26.301323 |
| O  | -1.679743 | 2.702595  | 26.119898 |
| O  | 1.694384  | 1.953706  | 22.194926 |
| O  | 0.541934  | -0.386457 | 22.209212 |
| O  | -0.770953 | 0.837154  | 24.504181 |

|    |           |           |           |
|----|-----------|-----------|-----------|
| Ti | -0.130053 | 1.368878  | 22.857399 |
| O  | -1.572108 | 2.182463  | 21.769837 |
| O  | 1.568083  | 1.989713  | 26.166910 |
| Ti | 4.641799  | -3.071995 | 22.743900 |
| O  | 4.204701  | -4.156101 | 24.246731 |
| Ti | 4.614625  | -2.798556 | 25.540075 |
| O  | 5.301090  | -1.762926 | 24.128388 |
| O  | 3.058190  | -2.073605 | 26.268030 |
| O  | 3.160063  | -1.982045 | 22.292661 |
| O  | 4.314383  | 0.807442  | 22.158562 |
| Ti | 2.585098  | -0.215692 | 22.612646 |
| O  | 2.323914  | -0.030365 | 24.452028 |
| O  | 4.181897  | 0.790705  | 26.502523 |
| Ti | 2.307050  | -0.326066 | 26.360535 |
| O  | 0.346755  | -0.341890 | 26.863925 |
| O  | 5.269458  | 3.475786  | 26.472204 |
| O  | 5.410054  | 3.475320  | 22.030319 |
| Ti | 7.955326  | -2.027091 | 22.379160 |
| O  | 8.090184  | -2.684368 | 24.150911 |
| O  | 9.674617  | -1.603663 | 26.062600 |
| Ti | 7.751355  | -2.063703 | 25.884846 |
| O  | 6.127030  | -3.146910 | 26.677916 |
| O  | 6.447097  | -3.353273 | 21.992823 |
| O  | 7.245331  | -0.309896 | 22.302823 |
| Ti | 6.302675  | 1.355597  | 22.426612 |
| O  | 6.293188  | 1.651410  | 24.256305 |
| O  | 6.967703  | -0.388852 | 26.176671 |
| Ti | 6.152581  | 1.337543  | 26.077523 |
| Ti | 6.425170  | 7.817065  | 31.872452 |
| O  | 6.372399  | 8.016647  | 29.964058 |
| O  | 4.673032  | 8.357925  | 27.729438 |
| Ti | 6.605865  | 8.229304  | 28.113656 |
| O  | 8.201091  | 9.367289  | 27.638351 |
| O  | 7.887669  | 9.038232  | 32.033596 |
| O  | 7.383152  | 6.475681  | 32.839946 |
| Ti | 8.443613  | 5.007080  | 32.308978 |
| O  | 8.343091  | 5.110144  | 30.483674 |
| O  | 7.317600  | 6.562889  | 27.562754 |
| Ti | 8.797866  | 5.482274  | 28.611154 |
| O  | 9.591866  | 3.442834  | 28.155245 |
| O  | 9.305455  | 3.134727  | 32.948443 |
| Ti | 9.476307  | 8.654974  | 31.154315 |
| O  | 9.940606  | 9.940133  | 29.881057 |
| Ti | 9.943231  | 8.793492  | 28.346146 |
| O  | 9.264644  | 7.358634  | 29.619616 |
| O  | 11.822170 | 8.748995  | 28.141630 |
| O  | 10.867023 | 8.115180  | 32.228684 |
| O  | 10.381700 | 5.431214  | 32.586871 |
| Ti | 11.931465 | 6.532000  | 32.005161 |
| O  | 12.357850 | 6.542686  | 30.212373 |
| O  | 10.791279 | 5.854482  | 28.228693 |
| Ti | 12.641028 | 7.081422  | 28.287890 |

|    |           |           |           |
|----|-----------|-----------|-----------|
| O  | 14.584735 | 7.323301  | 28.369347 |
| O  | 13.445427 | 4.818069  | 28.237320 |
| O  | 12.790171 | 4.342994  | 32.278485 |
| O  | 13.610355 | 6.697941  | 32.984813 |
| O  | 15.408628 | 5.836351  | 30.845253 |
| Ti | 14.493084 | 5.169780  | 32.326460 |
| O  | 15.526258 | 3.584335  | 32.567263 |
| Ti | 15.110833 | 5.679640  | 29.009174 |
| O  | 16.280806 | 4.422642  | 28.333293 |
| Ti | 15.380313 | 2.693677  | 28.478134 |
| Ti | 15.190082 | 2.244928  | 31.282852 |
| O  | 14.777345 | 1.080137  | 27.499090 |
| Ti | 12.932837 | 0.461776  | 28.031315 |
| O  | 12.985733 | -0.058989 | 29.851099 |
| O  | 14.539519 | 0.699870  | 32.078336 |
| Ti | 12.736828 | 0.168052  | 31.698029 |
| O  | 14.029324 | 2.987193  | 29.900704 |
| O  | 11.627405 | -0.963217 | 27.588954 |
| O  | 12.022056 | 2.056180  | 28.012315 |
| Ti | 11.641762 | 3.882415  | 28.552083 |
| O  | 16.441283 | 1.940078  | 29.898295 |
| O  | 10.923991 | 3.557027  | 30.285972 |
| O  | 11.840207 | 1.671948  | 32.357476 |
| Ti | 11.075591 | 3.373106  | 32.097040 |
| Ti | 0.992959  | 4.842433  | 31.247809 |
| Ti | 0.329385  | 4.712441  | 28.418054 |
| O  | 1.947346  | 6.274477  | 31.971379 |
| Ti | 3.538230  | 7.211009  | 31.512713 |
| O  | 2.976430  | 7.891132  | 29.897632 |
| O  | 1.397138  | 6.314283  | 27.970684 |
| Ti | 3.280769  | 7.043683  | 28.222884 |
| O  | 1.863462  | 4.088926  | 29.665896 |
| O  | 4.664985  | 8.391323  | 32.437918 |
| O  | 4.945064  | 5.894954  | 31.505299 |
| Ti | 5.210022  | 4.045981  | 31.986670 |
| O  | -0.484196 | 5.209865  | 30.046440 |
| O  | 5.159838  | 3.186085  | 30.382378 |
| O  | 4.275067  | 5.502740  | 28.500452 |
| Ti | 5.146644  | 3.777070  | 28.575233 |
| Ti | 2.283372  | 2.155892  | 32.422737 |
| O  | 0.843015  | 3.504210  | 32.502713 |
| O  | 3.445328  | 2.674273  | 28.246826 |
| O  | 2.422852  | 0.239574  | 28.412940 |
| O  | 1.588357  | 1.549265  | 30.778400 |
| Ti | 1.741112  | 2.000041  | 28.953604 |
| O  | 0.114168  | 2.756441  | 28.084540 |
| O  | 3.609303  | 3.466138  | 32.769007 |
| Ti | 6.490196  | -2.434597 | 28.723120 |
| O  | 6.278587  | -3.607988 | 30.198140 |
| Ti | 6.810647  | -2.295081 | 31.491083 |
| O  | 7.107365  | -1.092514 | 30.083969 |
| O  | 5.374816  | -1.640496 | 32.504194 |

|    |           |           |           |
|----|-----------|-----------|-----------|
| O  | 4.925552  | -1.403691 | 28.365496 |
| O  | 6.073053  | 1.555215  | 28.282795 |
| Ti | 4.468724  | 0.378347  | 28.665849 |
| O  | 4.413356  | 0.557797  | 30.572162 |
| O  | 6.216322  | 1.140028  | 32.962124 |
| Ti | 4.783617  | 0.153072  | 32.351720 |
| O  | 3.131630  | 0.694819  | 33.207270 |
| O  | 6.858951  | 3.762242  | 32.849734 |
| O  | 7.067070  | 4.232102  | 28.321270 |
| Ti | 9.733822  | -1.169734 | 28.213436 |
| O  | 10.103082 | -1.618326 | 30.004726 |
| O  | 11.631666 | -1.201145 | 32.362634 |
| Ti | 9.806010  | -1.290360 | 31.822422 |
| O  | 8.458980  | -2.552327 | 32.336646 |
| O  | 8.280410  | -2.548802 | 27.920052 |
| O  | 9.030347  | 0.550524  | 28.261359 |
| Ti | 8.034417  | 2.147350  | 28.592425 |
| O  | 7.864272  | 2.162772  | 30.471168 |
| O  | 9.012353  | 0.310966  | 32.370358 |
| Ti | 7.890749  | 1.855455  | 32.299774 |

48c-like 3-D (1,1,0)-mer

|    |           |          |           |
|----|-----------|----------|-----------|
| Ti | -6.976387 | 3.817152 | -1.894256 |
| O  | -7.566604 | 4.004302 | -0.128614 |
| O  | -8.669484 | 2.716524 | 2.309632  |
| Ti | -7.180584 | 3.923479 | 1.701542  |
| O  | -6.627940 | 5.834075 | 1.968724  |
| O  | -6.372380 | 5.600788 | -2.235894 |
| O  | -5.358038 | 2.991058 | -2.315604 |
| Ti | -3.622967 | 2.261690 | -1.982216 |
| O  | -3.541326 | 2.243504 | -0.142753 |
| O  | -5.678078 | 2.870490 | 1.833501  |
| Ti | -3.774195 | 2.481794 | 1.734496  |
| O  | -1.983930 | 1.128570 | 2.089730  |
| O  | -1.885611 | 1.101900 | -2.531916 |
| Ti | -4.810884 | 6.156356 | -1.373187 |
| O  | -5.141020 | 7.613245 | -0.146638 |
| Ti | -4.907595 | 6.568854 | 1.389628  |
| O  | -4.470707 | 5.087925 | 0.198169  |
| O  | -3.077979 | 6.883593 | 2.154126  |
| O  | -3.278368 | 6.262831 | -2.399147 |
| O  | -2.253106 | 3.658715 | -2.476771 |
| Ti | -1.574447 | 5.461104 | -2.004426 |
| O  | -1.480053 | 5.658879 | -0.133644 |
| O  | -2.374311 | 3.923433 | 2.093424  |
| Ti | -1.556548 | 5.711321 | 1.731443  |
| O  | 0.004467  | 7.026383 | 2.044371  |
| O  | 0.323318  | 4.316088 | 1.883163  |
| O  | 0.314842  | 4.171327 | -1.863891 |
| O  | -0.165012 | 6.611427 | -2.665743 |
| O  | 1.687110  | 6.327253 | -0.149727 |
| Ti | 1.334146  | 5.758196 | -1.881988 |

|    |            |           |           |
|----|------------|-----------|-----------|
| Ti | 1.551459   | 5.794512  | 1.665735  |
| Ti | -0.423180  | 2.375366  | 1.810944  |
| O  | -0.599074  | 2.275500  | -0.095275 |
| Ti | -0.528142  | 2.370847  | -1.935432 |
| Ti | -9.797047  | -2.016901 | -1.319811 |
| Ti | -9.747356  | -2.369014 | 1.484962  |
| O  | -10.048792 | -0.382964 | -2.166021 |
| Ti | -8.732165  | 0.964607  | -1.781354 |
| O  | -9.123444  | 1.098849  | 0.073725  |
| O  | -10.151169 | -0.757577 | 2.511750  |
| Ti | -8.918686  | 0.821629  | 1.915407  |
| O  | -8.503567  | -1.812998 | 0.118356  |
| O  | -8.396458  | 2.685026  | -2.472922 |
| O  | -7.198015  | 0.097062  | -2.354623 |
| Ti | -5.604186  | -0.790513 | -1.845538 |
| O  | -11.025111 | -2.478586 | 0.073753  |
| O  | -5.435278  | -0.506548 | -0.040936 |
| O  | -7.321739  | -0.040894 | 2.218464  |
| Ti | -5.805672  | -1.132628 | 1.695907  |
| Ti | -7.502930  | -4.151863 | -2.017359 |
| O  | -9.207910  | -3.377664 | -2.452215 |
| O  | -6.610062  | -2.924070 | 1.453259  |
| O  | -6.297044  | -5.597888 | 1.975955  |
| O  | -7.923834  | -5.124212 | -0.491298 |
| Ti | -7.630932  | -4.570643 | 1.268124  |
| O  | -9.337370  | -4.153042 | 1.947954  |
| O  | -6.460110  | -2.594206 | -1.851051 |
| O  | -3.116151  | -4.909928 | -2.759049 |
| O  | -3.357246  | -5.557918 | 2.292770  |
| O  | -4.028118  | -2.304941 | 2.068434  |
| Ti | -4.771242  | -4.342760 | 1.900446  |
| O  | -4.510821  | -4.135176 | -0.060521 |
| O  | -3.968794  | -2.140018 | -2.372332 |
| Ti | -4.558811  | -3.971454 | -1.907578 |
| O  | -6.022538  | -5.030084 | -2.697721 |
| O  | -4.289980  | 0.453205  | -2.612372 |
| O  | -4.476722  | 0.464359  | 2.154364  |
| O  | -1.169734  | -1.859768 | 2.117518  |
| Ti | -2.632052  | -0.757571 | 1.713986  |
| O  | -2.527002  | -0.770332 | -0.195894 |
| O  | -1.040324  | -1.504209 | -2.820092 |
| Ti | -2.564772  | -0.732797 | -2.062420 |
| O  | 0.985484   | 1.729910  | -2.893754 |
| Ti | 2.459358   | 0.833561  | -2.215157 |
| O  | 2.261574   | 0.735228  | -0.388720 |
| O  | 1.169957   | 1.483553  | 2.001856  |
| Ti | 2.788837   | 0.562964  | 1.470693  |
| O  | 4.480217   | -0.713932 | 2.093720  |
| O  | 4.272432   | -0.302721 | -2.628887 |
| O  | 3.351965   | 5.321400  | 1.907495  |
| O  | 2.996427   | 5.214042  | -2.575234 |
| O  | 3.931780   | 2.264662  | -2.422946 |

|    |           |           |           |
|----|-----------|-----------|-----------|
| Ti | 4.398489  | 4.071859  | -2.048442 |
| O  | 4.717258  | 4.069021  | -0.201929 |
| O  | 3.934943  | 2.209518  | 2.015199  |
| Ti | 4.700724  | 4.031114  | 1.716979  |
| O  | 6.395357  | 5.196823  | 2.186140  |
| O  | 6.634372  | 2.669160  | 1.941812  |
| O  | 6.734675  | 2.313079  | -1.771655 |
| O  | 6.005433  | 4.783764  | -2.824919 |
| O  | 7.796750  | 4.960483  | -0.296947 |
| Ti | 7.446403  | 4.039614  | -1.895197 |
| O  | 9.237576  | 3.548105  | -2.414031 |
| Ti | 7.876797  | 4.152168  | 1.407910  |
| O  | 9.599274  | 4.023682  | 2.255020  |
| Ti | 10.384508 | 2.357782  | 1.498470  |
| Ti | 9.746760  | 2.151263  | -1.300434 |
| O  | 10.332293 | 0.483780  | 1.906689  |
| Ti | 9.084707  | -1.077508 | 1.618798  |
| O  | 9.640836  | -1.522239 | -0.111328 |
| O  | 9.694484  | 0.495273  | -2.106652 |
| Ti | 8.703842  | -1.111794 | -1.671755 |
| O  | 8.686588  | 2.351439  | 0.358815  |
| O  | 8.614189  | -2.891701 | 2.214258  |
| O  | 7.426885  | -0.215068 | 1.465840  |
| Ti | 5.871416  | 0.795054  | 1.831582  |
| O  | 11.271302 | 2.475835  | -0.146765 |
| O  | 4.832563  | 0.843838  | 0.129209  |
| O  | 7.008409  | -0.390914 | -1.562603 |
| Ti | 5.503796  | 0.816982  | -1.594769 |
| Ti | 0.483421  | -2.202794 | -1.981180 |
| O  | 0.543309  | -2.070260 | -0.125480 |
| Ti | 0.460233  | -2.663058 | 1.665050  |
| Ti | -1.532740 | -5.503617 | -2.012877 |
| O  | -0.578475 | -4.448183 | 2.033364  |
| O  | -0.442512 | -7.164417 | 2.025986  |
| O  | -2.014768 | -6.197991 | -0.340866 |
| Ti | -1.743570 | -5.940831 | 1.477429  |
| O  | -0.466413 | -3.957638 | -1.787822 |
| Ti | 4.426237  | -6.141764 | 1.831543  |
| O  | 4.900222  | -7.164409 | 0.306229  |
| Ti | 4.586577  | -5.834458 | -0.985346 |
| O  | 4.180522  | -4.595583 | 0.542350  |
| O  | 3.106996  | -6.056976 | -2.035057 |
| O  | 2.758889  | -6.988730 | 2.163077  |
| O  | 2.139642  | -3.978423 | 2.076836  |
| Ti | 1.151264  | -6.055632 | 1.992107  |
| O  | 1.166750  | -5.495875 | 0.100883  |
| O  | 2.137861  | -3.535285 | -2.341295 |
| Ti | 1.356543  | -5.294424 | -1.724471 |
| O  | 0.025463  | -6.404254 | -2.591492 |
| O  | 1.867121  | -1.017774 | -2.741156 |
| O  | 1.932815  | -1.286894 | 2.056611  |
| Ti | 7.018469  | -4.018905 | 1.938262  |



|    |           |           |           |
|----|-----------|-----------|-----------|
| O  | 7.167255  | -3.886169 | 0.059971  |
| O  | 8.307547  | -2.785550 | -2.469340 |
| Ti | 6.814752  | -3.735034 | -1.788910 |
| O  | 6.155130  | -5.503850 | -1.959283 |
| O  | 6.232259  | -5.780038 | 2.555725  |
| O  | 5.487927  | -3.046148 | 2.328774  |
| Ti | 3.678937  | -2.659899 | 1.638954  |
| O  | 3.577903  | -2.086112 | -0.201689 |
| O  | 5.243755  | -2.925115 | -2.423332 |
| Ti | 3.566920  | -2.129440 | -2.043746 |
| Ti | -6.007863 | 5.565487  | 4.082029  |
| O  | -6.157575 | 5.432294  | 5.961277  |
| O  | -7.297443 | 4.330656  | 8.491642  |
| Ti | -5.804268 | 5.280136  | 7.810706  |
| O  | -5.144091 | 7.048975  | 7.980429  |
| O  | -5.221135 | 7.325652  | 3.466143  |
| O  | -4.478422 | 4.591421  | 3.693794  |
| Ti | -2.669270 | 4.203721  | 4.382354  |
| O  | -2.568221 | 3.628446  | 6.222597  |
| O  | -4.234128 | 4.469634  | 8.444217  |
| Ti | -2.557427 | 3.672997  | 8.064859  |
| O  | -0.857159 | 2.559486  | 8.762442  |
| O  | -0.924142 | 2.830607  | 3.965274  |
| Ti | -3.414585 | 7.686477  | 4.190048  |
| O  | -3.888839 | 8.709195  | 5.715606  |
| Ti | -3.575723 | 7.378656  | 7.006684  |
| O  | -3.170682 | 6.139778  | 5.478641  |
| O  | -2.096386 | 7.600893  | 8.056982  |
| O  | -1.747391 | 8.534068  | 3.858329  |
| O  | -1.130442 | 5.522637  | 3.944444  |
| Ti | -0.140844 | 7.599517  | 4.029651  |
| O  | -0.156531 | 7.037675  | 5.919809  |
| O  | -1.129207 | 5.078700  | 8.362486  |
| Ti | -0.346740 | 6.837444  | 7.745863  |
| O  | 0.983957  | 7.947865  | 8.612834  |
| O  | 1.476039  | 5.501000  | 7.811468  |
| O  | 1.588147  | 5.992088  | 3.987923  |
| O  | 1.453272  | 8.708803  | 3.995778  |
| O  | 3.024961  | 7.739944  | 6.362297  |
| Ti | 2.754289  | 7.484739  | 4.543733  |
| Ti | 2.542312  | 7.046904  | 8.034992  |
| Ti | 0.525915  | 3.745994  | 8.001672  |
| O  | 0.466179  | 3.616624  | 6.146140  |
| Ti | 0.549053  | 4.206212  | 4.356846  |
| Ti | -9.374772 | -0.810227 | 4.522543  |
| Ti | -8.736055 | -0.606056 | 7.321077  |
| O  | -9.322169 | 1.063273  | 4.115368  |
| Ti | -8.073830 | 2.624047  | 4.403053  |
| O  | -8.629848 | 3.068847  | 6.132561  |
| O  | -8.682546 | 1.049787  | 8.127250  |
| Ti | -7.693149 | 2.657624  | 7.691826  |
| O  | -7.678021 | -0.808117 | 5.660063  |

|    |            |           |          |
|----|------------|-----------|----------|
| O  | -7.603838  | 4.438090  | 3.806988 |
| O  | -6.416694  | 1.760202  | 4.556132 |
| Ti | -4.862526  | 0.748842  | 4.188876 |
| O  | -10.261943 | -0.928340 | 6.168154 |
| O  | -3.821700  | 0.700283  | 5.891784 |
| O  | -5.997471  | 1.937920  | 7.581072 |
| Ti | -4.494903  | 0.727193  | 7.614487 |
| Ti | -6.869100  | -2.608052 | 4.610483 |
| O  | -8.592289  | -2.476822 | 3.761149 |
| O  | -5.728398  | -0.766327 | 7.789646 |
| O  | -4.996533  | -3.237229 | 8.844705 |
| O  | -6.788386  | -3.415365 | 6.314965 |
| Ti | -6.437627  | -2.494263 | 7.913658 |
| O  | -8.228838  | -2.004837 | 8.433492 |
| O  | -5.624255  | -1.125023 | 4.077825 |
| O  | -2.342290  | -3.776393 | 4.113139 |
| O  | -1.986249  | -3.670593 | 8.595665 |
| O  | -2.922916  | -0.721547 | 8.443155 |
| Ti | -3.388404  | -2.528712 | 8.069227 |
| O  | -3.709378  | -2.525298 | 6.221092 |
| O  | -2.926371  | -0.666000 | 4.005403 |
| Ti | -3.691771  | -2.487425 | 4.303619 |
| O  | -5.386660  | -3.652655 | 3.834456 |
| O  | -3.471190  | 2.257768  | 3.927028 |
| O  | -3.263526  | 1.846177  | 8.649342 |
| O  | 0.024106   | -0.187022 | 8.915213 |
| Ti | -1.450432  | 0.709867  | 8.236626 |
| O  | -1.252794  | 0.808467  | 6.410460 |
| O  | -0.160569  | 0.060975  | 4.020135 |
| Ti | -1.780438  | 0.981047  | 4.550886 |
| O  | 2.178978   | 3.403767  | 3.903706 |
| Ti | 3.641046   | 2.301174  | 4.307312 |
| O  | 3.535742   | 2.313886  | 6.217496 |
| O  | 2.048680   | 3.046855  | 8.841532 |
| Ti | 3.574302   | 2.276206  | 8.083211 |
| O  | 5.299673   | 1.091627  | 8.633400 |
| O  | 5.485822   | 1.079682  | 3.866341 |
| O  | 4.126151   | 6.453885  | 8.780949 |
| O  | 4.368158   | 7.102692  | 3.728717 |
| O  | 5.036705   | 3.848886  | 3.952271 |
| Ti | 5.781456   | 5.886274  | 4.120295 |
| O  | 5.520108   | 5.679114  | 6.081667 |
| O  | 4.976459   | 3.683669  | 8.393342 |
| Ti | 5.568097   | 5.514828  | 7.928387 |
| O  | 7.031946   | 6.575114  | 8.717901 |
| O  | 7.469417   | 4.138318  | 7.872441 |
| O  | 7.621238   | 4.466274  | 4.567946 |
| O  | 7.308479   | 7.140137  | 4.045015 |
| O  | 8.934334   | 6.666240  | 6.511887 |
| Ti | 8.641660   | 6.112174  | 4.752729 |
| O  | 10.349709  | 5.694863  | 4.074291 |
| Ti | 8.512180   | 5.696285  | 8.038883 |

|    |           |           |          |
|----|-----------|-----------|----------|
| O  | 10.217311 | 4.922888  | 8.477107 |
| Ti | 10.807934 | 3.561963  | 7.346253 |
| Ti | 10.762358 | 3.913221  | 4.541917 |
| O  | 11.059112 | 1.927218  | 8.190914 |
| Ti | 9.742469  | 0.580354  | 7.802671 |
| O  | 10.134072 | 0.448604  | 5.947755 |
| O  | 11.160632 | 2.305385  | 3.509984 |
| Ti | 9.929009  | 0.724750  | 4.106129 |
| O  | 9.516155  | 3.358381  | 5.905946 |
| O  | 9.407100  | -1.139706 | 8.494350 |
| O  | 8.207539  | 1.447788  | 8.375549 |
| Ti | 6.613477  | 2.334635  | 7.866075 |
| O  | 12.038111 | 4.023251  | 5.954208 |
| O  | 6.445226  | 2.050661  | 6.061800 |
| O  | 8.331963  | 1.586694  | 3.802385 |
| Ti | 6.814210  | 2.676579  | 4.324207 |
| Ti | 1.432448  | -0.831337 | 4.210713 |
| O  | 1.607974  | -0.731621 | 6.116719 |
| Ti | 1.537511  | -0.826928 | 7.956568 |
| Ti | -0.541879 | -4.250024 | 4.355566 |
| O  | 0.695034  | -2.628456 | 7.884631 |
| O  | 1.175627  | -5.068157 | 8.686377 |
| O  | -0.677721 | -4.784851 | 6.170679 |
| Ti | -0.324033 | -4.215701 | 7.901727 |
| O  | 0.686075  | -2.771960 | 4.137441 |
| Ti | 5.821705  | -4.610150 | 7.394221 |
| O  | 6.151739  | -6.067423 | 6.167818 |
| Ti | 5.918502  | -5.023102 | 4.631658 |
| O  | 5.480868  | -3.542439 | 5.822082 |
| O  | 4.088895  | -5.338994 | 3.867284 |
| O  | 4.289346  | -4.718011 | 8.419495 |
| O  | 3.262289  | -2.114412 | 8.498265 |
| Ti | 2.584921  | -3.917317 | 8.025330 |
| O  | 2.490526  | -4.115299 | 6.153219 |
| O  | 3.383271  | -2.379349 | 3.927673 |
| Ti | 2.566280  | -4.167762 | 4.289640 |
| O  | 1.005578  | -5.482165 | 3.976498 |
| O  | 2.993279  | 0.415226  | 3.931694 |
| O  | 2.895650  | 0.442014  | 8.553351 |
| Ti | 7.986873  | -2.271694 | 7.915822 |
| O  | 8.576246  | -2.457547 | 6.149791 |
| O  | 9.679966  | -1.170368 | 3.712229 |
| Ti | 8.191254  | -2.377495 | 4.319412 |
| O  | 7.639004  | -4.287856 | 4.052322 |
| O  | 7.384039  | -4.055432 | 8.257307 |
| O  | 6.367954  | -1.446581 | 8.336728 |
| Ti | 4.632485  | -0.717808 | 8.003604 |
| O  | 4.550725  | -0.700393 | 6.164052 |
| O  | 6.688308  | -1.325470 | 4.187381 |
| Ti | 4.783813  | -0.937891 | 4.286338 |

48c-like 3-D (1,1,1)-mer

|    |            |           |           |
|----|------------|-----------|-----------|
| Ti | -6.995592  | 3.854809  | -1.854481 |
| O  | -7.510142  | 4.014417  | -0.064279 |
| O  | -8.638971  | 2.787498  | 2.307507  |
| Ti | -7.106445  | 3.950350  | 1.776564  |
| O  | -6.611152  | 5.881986  | 2.085287  |
| O  | -6.465763  | 5.649443  | -2.243937 |
| O  | -5.382497  | 3.034021  | -2.344437 |
| Ti | -3.661368  | 2.264167  | -2.087847 |
| O  | -3.565099  | 2.203065  | -0.242129 |
| O  | -5.566466  | 2.944425  | 1.896188  |
| Ti | -3.762481  | 2.337399  | 1.643897  |
| O  | -1.958817  | 1.028969  | 1.960955  |
| O  | -1.922673  | 1.097058  | -2.717633 |
| Ti | -4.906181  | 6.217976  | -1.374577 |
| O  | -5.210694  | 7.695312  | -0.163962 |
| Ti | -4.930811  | 6.675072  | 1.394728  |
| O  | -4.602498  | 5.155085  | 0.182037  |
| O  | -3.125088  | 6.845509  | 2.028536  |
| O  | -3.369844  | 6.270138  | -2.408452 |
| O  | -2.292924  | 3.638550  | -2.621575 |
| Ti | -1.668217  | 5.431611  | -2.085626 |
| O  | -1.525191  | 5.533490  | -0.229848 |
| O  | -2.416209  | 3.819248  | 1.993945  |
| Ti | -1.679384  | 5.680166  | 1.655012  |
| O  | -0.124351  | 7.031242  | 1.908789  |
| O  | 0.264515   | 4.311869  | 1.710460  |
| O  | 0.287336   | 4.135529  | -2.025611 |
| O  | -0.267139  | 6.582280  | -2.784247 |
| O  | 1.613714   | 6.388111  | -0.335644 |
| Ti | 1.257420   | 5.743698  | -2.039805 |
| Ti | 1.429347   | 5.834250  | 1.468619  |
| Ti | -0.474995  | 2.393075  | 1.605166  |
| O  | -0.635316  | 2.203787  | -0.276414 |
| Ti | -0.539866  | 2.333309  | -2.120464 |
| Ti | -9.747112  | -2.054330 | -1.333780 |
| Ti | -9.684093  | -2.399829 | 1.478395  |
| O  | -10.002656 | -0.416312 | -2.184099 |
| Ti | -8.730955  | 0.982023  | -1.841709 |
| O  | -9.149690  | 1.168971  | -0.007063 |
| O  | -10.207640 | -0.668543 | 2.331701  |
| Ti | -8.973118  | 0.903681  | 1.839630  |
| O  | -8.421385  | -1.898422 | 0.072770  |
| O  | -8.401340  | 2.731322  | -2.474308 |
| O  | -7.194989  | 0.127797  | -2.448990 |
| Ti | -5.625306  | -0.779834 | -1.907225 |
| O  | -10.970466 | -2.493906 | 0.044058  |
| O  | -5.505340  | -0.530865 | -0.093572 |
| O  | -7.369072  | 0.052390  | 2.120568  |
| Ti | -5.875476  | -1.101452 | 1.666693  |
| Ti | -7.481206  | -4.156987 | -2.066124 |
| O  | -9.186223  | -3.414091 | -2.504531 |
| O  | -6.855152  | -2.859982 | 1.892055  |

|    |           |           |           |
|----|-----------|-----------|-----------|
| O  | -6.213115 | -5.576025 | 1.913686  |
| O  | -7.826204 | -5.112731 | -0.521416 |
| Ti | -7.612053 | -4.592697 | 1.265160  |
| O  | -9.366479 | -4.271794 | 1.822679  |
| O  | -6.452728 | -2.591676 | -1.861961 |
| O  | -3.067233 | -4.820294 | -2.759832 |
| O  | -3.284541 | -5.760715 | 2.140603  |
| O  | -4.129356 | -2.333358 | 1.907810  |
| Ti | -4.627354 | -4.404449 | 1.958320  |
| O  | -4.530101 | -4.114402 | -0.038964 |
| O  | -3.977781 | -2.125736 | -2.416179 |
| Ti | -4.552951 | -3.949883 | -1.883686 |
| O  | -5.975823 | -5.014003 | -2.734707 |
| O  | -4.314084 | 0.451735  | -2.693300 |
| O  | -4.474730 | 0.396682  | 2.118979  |
| O  | -1.211390 | -1.944912 | 2.009303  |
| Ti | -2.701423 | -0.887114 | 1.609807  |
| O  | -2.530250 | -0.755435 | -0.297312 |
| O  | -1.030337 | -1.513865 | -2.902629 |
| Ti | -2.566711 | -0.725705 | -2.159709 |
| O  | 1.013485  | 1.676256  | -2.985919 |
| Ti | 2.538685  | 0.827324  | -2.324703 |
| O  | 2.432264  | 0.764757  | -0.479736 |
| O  | 1.123729  | 1.496762  | 1.868433  |
| Ti | 2.718896  | 0.561742  | 1.409636  |
| O  | 4.509377  | -0.681665 | 1.899959  |
| O  | 4.328441  | -0.343237 | -2.773624 |
| O  | 3.237065  | 5.287158  | 1.681388  |
| O  | 2.945257  | 5.201367  | -2.703319 |
| O  | 3.970871  | 2.239941  | -2.621220 |
| Ti | 4.361034  | 4.052092  | -2.237299 |
| O  | 4.726968  | 4.027516  | -0.402283 |
| O  | 3.950047  | 2.186023  | 1.847353  |
| Ti | 4.621852  | 4.056184  | 1.522802  |
| O  | 6.300756  | 5.258732  | 1.902543  |
| O  | 6.659789  | 2.703008  | 1.891667  |
| O  | 6.890879  | 2.141462  | -2.237647 |
| O  | 5.977877  | 4.643990  | -3.085340 |
| O  | 7.668751  | 4.860664  | -0.609488 |
| Ti | 7.473716  | 3.923746  | -2.214424 |
| O  | 9.330281  | 3.466321  | -2.493053 |
| Ti | 7.778518  | 4.177792  | 1.149259  |
| O  | 9.506245  | 4.233083  | 1.896023  |
| Ti | 10.307921 | 2.506998  | 1.518453  |
| Ti | 9.762840  | 2.101509  | -1.295408 |
| O  | 10.305976 | 0.602985  | 2.016018  |
| Ti | 9.122843  | -1.046979 | 1.758611  |
| O  | 9.693023  | -1.529141 | 0.040118  |
| O  | 9.760386  | 0.402152  | -2.039301 |
| Ti | 8.785694  | -1.183683 | -1.558304 |
| O  | 8.633199  | 2.277780  | 0.296901  |
| O  | 8.606747  | -2.880581 | 2.323412  |

|    |           |           |           |
|----|-----------|-----------|-----------|
| O  | 7.469378  | -0.211562 | 1.605669  |
| Ti | 5.882380  | 0.839980  | 1.669142  |
| O  | 11.241485 | 2.500765  | -0.114802 |
| O  | 5.114311  | 0.980331  | -0.097253 |
| O  | 7.032972  | -0.584995 | -1.559167 |
| Ti | 5.639373  | 0.745936  | -1.831022 |
| Ti | 0.495726  | -2.177352 | -2.047356 |
| O  | 0.560118  | -1.960724 | -0.210650 |
| Ti | 0.464763  | -2.697106 | 1.535382  |
| Ti | -1.471537 | -5.469476 | -2.109860 |
| O  | -0.610557 | -4.504950 | 1.786148  |
| O  | -0.385890 | -7.237120 | 1.892255  |
| O  | -1.973114 | -6.360361 | -0.542672 |
| Ti | -1.699121 | -6.083007 | 1.271000  |
| O  | -0.413364 | -3.948285 | -1.737887 |
| Ti | 4.391730  | -6.107236 | 1.892262  |
| O  | 4.911211  | -7.118065 | 0.361156  |
| Ti | 4.674153  | -5.785811 | -0.935654 |
| O  | 4.240079  | -4.530586 | 0.602473  |
| O  | 3.233282  | -5.975519 | -2.039954 |
| O  | 2.754846  | -7.010524 | 2.179646  |
| O  | 2.131357  | -4.002792 | 1.974969  |
| Ti | 1.167587  | -6.058993 | 1.921828  |
| O  | 1.230268  | -5.545546 | 0.012822  |
| O  | 2.153427  | -3.521236 | -2.421438 |
| Ti | 1.427431  | -5.282762 | -1.800332 |
| O  | 0.107613  | -6.314569 | -2.754719 |
| O  | 1.906869  | -1.016533 | -2.804926 |
| O  | 1.956934  | -1.322404 | 1.891076  |
| Ti | 6.918726  | -3.854260 | 2.045870  |
| O  | 6.943304  | -3.562888 | 0.174820  |
| O  | 8.446300  | -2.873048 | -2.353166 |
| Ti | 6.809309  | -3.596583 | -1.724083 |
| O  | 6.286658  | -5.420223 | -1.808181 |
| O  | 6.174954  | -5.645893 | 2.568649  |
| O  | 5.462849  | -2.800827 | 2.663983  |
| Ti | 3.679757  | -2.668842 | 1.587021  |
| O  | 3.676114  | -2.136268 | -0.293679 |
| O  | 5.272130  | -2.941377 | -2.581884 |
| Ti | 3.610057  | -2.145145 | -2.131140 |
| Ti | -6.046662 | 5.712494  | 4.146639  |
| O  | -6.750186 | 6.090010  | 5.838280  |
| O  | -7.712195 | 4.259982  | 8.218664  |
| Ti | -6.288555 | 5.540511  | 7.576536  |
| O  | -5.525031 | 7.370694  | 7.915231  |
| O  | -5.154209 | 7.463371  | 3.494623  |
| O  | -4.430380 | 4.793352  | 4.068028  |
| Ti | -2.643964 | 4.061212  | 4.318102  |
| O  | -2.426186 | 3.942322  | 6.137803  |
| O  | -4.832190 | 4.430963  | 7.576820  |
| Ti | -2.923778 | 4.116634  | 7.987645  |
| O  | -1.051874 | 2.722890  | 8.301709  |

|    |            |           |          |
|----|------------|-----------|----------|
| O  | -0.850090  | 2.787844  | 3.799360 |
| Ti | -3.602449  | 7.985267  | 4.518690 |
| O  | -4.094476  | 9.269705  | 5.880848 |
| Ti | -3.811073  | 8.089340  | 7.318958 |
| O  | -3.346232  | 6.765002  | 5.991067 |
| O  | -1.999034  | 8.386594  | 8.147811 |
| O  | -1.934498  | 8.534672  | 3.883999 |
| O  | -1.236247  | 5.514329  | 3.809026 |
| Ti | -0.302523  | 7.562193  | 3.914756 |
| O  | -0.237868  | 7.237845  | 5.862337 |
| O  | -1.313229  | 5.513309  | 8.208955 |
| Ti | -0.407291  | 7.259528  | 7.686653 |
| O  | 1.133778   | 8.538646  | 8.181377 |
| O  | 1.394601   | 5.882612  | 8.151506 |
| O  | 1.551380   | 5.986776  | 3.711088 |
| O  | 1.328432   | 8.646554  | 3.814504 |
| O  | 2.936218   | 7.679412  | 6.169124 |
| Ti | 2.681859   | 7.475254  | 4.353105 |
| Ti | 2.744963   | 7.276946  | 8.009067 |
| Ti | 0.388789   | 4.044681  | 7.900874 |
| O  | 0.471655   | 4.316675  | 6.021309 |
| Ti | 0.548590   | 4.220208  | 4.179293 |
| Ti | -9.568873  | -0.741591 | 4.386737 |
| Ti | -8.973650  | -0.893548 | 7.182679 |
| O  | -9.492465  | 1.127808  | 3.997535 |
| Ti | -8.092011  | 2.539748  | 4.420850 |
| O  | -8.758364  | 2.552348  | 6.213320 |
| O  | -8.995484  | 0.516228  | 8.481535 |
| Ti | -8.031727  | 2.340969  | 7.907110 |
| O  | -7.898518  | -0.895994 | 5.524904 |
| O  | -7.460917  | 4.325549  | 3.937246 |
| O  | -6.461955  | 1.671659  | 4.456598 |
| Ti | -4.823108  | 0.709275  | 4.251631 |
| O  | -10.500597 | -0.906447 | 6.014545 |
| O  | -4.306534  | 0.501774  | 6.048169 |
| O  | -6.427292  | 1.472379  | 7.934602 |
| Ti | -4.801453  | 0.393572  | 7.834216 |
| Ti | -7.019725  | -2.635558 | 4.245383 |
| O  | -8.891187  | -2.427536 | 3.572570 |
| O  | -5.865469  | -1.287251 | 7.759605 |
| O  | -5.415194  | -3.962494 | 8.345901 |
| O  | -7.084666  | -3.601832 | 5.850574 |
| Ti | -6.755720  | -2.964986 | 7.586689 |
| O  | -8.613584  | -2.502106 | 7.976872 |
| O  | -5.691480  | -1.165057 | 4.000873 |
| O  | -2.536500  | -3.753847 | 3.790818 |
| O  | -2.334399  | -4.002629 | 8.433963 |
| O  | -3.021616  | -0.801530 | 8.334484 |
| Ti | -3.806012  | -2.823521 | 8.195407 |
| O  | -3.780971  | -2.558354 | 6.240978 |
| O  | -2.946465  | -0.697664 | 3.935909 |
| Ti | -3.830042  | -2.467739 | 4.393233 |

|    |           |           |          |
|----|-----------|-----------|----------|
| O  | -5.349496 | -3.724458 | 3.805391 |
| O  | -3.452252 | 2.176712  | 3.870208 |
| O  | -3.582694 | 2.065666  | 8.298132 |
| O  | -0.132585 | -0.211303 | 8.212913 |
| Ti | -1.686978 | 0.807351  | 7.934785 |
| O  | -1.644076 | 0.978767  | 6.068697 |
| O  | 0.042343  | 0.014670  | 3.893428 |
| Ti | -1.610022 | 0.855001  | 4.201642 |
| O  | 2.152524  | 3.300393  | 3.829585 |
| Ti | 3.706211  | 2.280671  | 4.107520 |
| O  | 3.663087  | 2.108396  | 5.973676 |
| O  | 1.977741  | 3.074369  | 8.149087 |
| Ti | 3.629462  | 2.232885  | 7.840664 |
| O  | 5.471752  | 0.911429  | 8.172485 |
| O  | 5.602053  | 1.022584  | 3.743982 |
| O  | 4.556302  | 6.842172  | 8.251526 |
| O  | 4.354949  | 7.091127  | 3.608806 |
| O  | 5.041084  | 3.889361  | 3.708047 |
| Ti | 5.826342  | 5.911364  | 3.847594 |
| O  | 5.800085  | 5.646025  | 5.801996 |
| O  | 4.965992  | 3.785339  | 8.106413 |
| Ti | 5.849466  | 5.555920  | 7.649742 |
| O  | 7.369170  | 6.812977  | 8.237053 |
| O  | 7.711018  | 4.253451  | 8.041887 |
| O  | 7.883267  | 4.376352  | 4.282980 |
| O  | 7.434965  | 7.051463  | 3.697435 |
| O  | 9.104445  | 6.689694  | 6.192121 |
| Ti | 8.775267  | 6.053369  | 4.455928 |
| O  | 10.633322 | 5.590481  | 4.065532 |
| Ti | 9.039132  | 5.723992  | 7.797654 |
| O  | 10.910475 | 5.516729  | 8.471011 |
| Ti | 11.589503 | 3.831386  | 7.656587 |
| Ti | 10.994747 | 3.982398  | 4.860531 |
| O  | 11.513716 | 1.962189  | 8.045708 |
| Ti | 10.112872 | 0.550809  | 7.622416 |
| O  | 10.778184 | 0.538189  | 5.829381 |
| O  | 11.016646 | 2.573362  | 3.561424 |
| Ti | 10.052223 | 0.749066  | 4.135505 |
| O  | 9.919238  | 3.984893  | 6.517851 |
| O  | 9.482291  | -1.235296 | 8.105638 |
| O  | 8.482505  | 1.418529  | 7.587131 |
| Ti | 6.842416  | 2.378856  | 7.791043 |
| O  | 12.521387 | 3.997003  | 6.028771 |
| O  | 6.326572  | 2.585129  | 5.994267 |
| O  | 8.447774  | 1.617827  | 4.107147 |
| Ti | 6.820414  | 2.694409  | 4.207966 |
| Ti | 1.630615  | -0.956592 | 4.141727 |
| O  | 1.547421  | -1.229241 | 6.021230 |
| Ti | 1.470787  | -1.132054 | 7.863217 |
| Ti | -0.725328 | -4.189163 | 4.033750 |
| O  | 0.468243  | -2.898711 | 8.331518 |
| O  | 0.691975  | -5.558492 | 8.228440 |



|    |           |           |           |
|----|-----------|-----------|-----------|
| O  | -0.916572 | -4.592200 | 5.873408  |
| Ti | -0.661428 | -4.387642 | 7.689385  |
| O  | 0.624611  | -2.794480 | 3.891116  |
| Ti | 5.623455  | -4.894963 | 7.524300  |
| O  | 6.115723  | -6.179208 | 6.158506  |
| Ti | 5.831625  | -5.000246 | 4.724141  |
| O  | 5.366320  | -3.674960 | 6.051480  |
| O  | 4.019775  | -5.297235 | 3.895235  |
| O  | 3.955310  | -5.445382 | 8.157980  |
| O  | 3.255934  | -2.426292 | 8.233455  |
| Ti | 2.322983  | -4.473862 | 8.127657  |
| O  | 2.256895  | -4.149578 | 6.180056  |
| O  | 3.332434  | -2.425103 | 3.833711  |
| Ti | 2.426928  | -4.171432 | 4.355835  |
| O  | 0.886205  | -5.450528 | 3.861240  |
| O  | 3.071288  | 0.365155  | 3.740831  |
| O  | 2.869501  | 0.300105  | 8.243160  |
| Ti | 8.067789  | -2.622002 | 7.896140  |
| O  | 8.770654  | -2.998821 | 6.203935  |
| O  | 9.732185  | -1.169620 | 3.823799  |
| Ti | 8.308476  | -2.450314 | 4.465731  |
| O  | 7.545447  | -4.280736 | 4.127426  |
| O  | 7.175768  | -4.372899 | 8.547928  |
| O  | 6.450869  | -1.703707 | 7.974631  |
| Ti | 4.663808  | -0.973187 | 7.724621  |
| O  | 4.445755  | -0.854354 | 5.904871  |
| O  | 6.851429  | -1.341534 | 4.464913  |
| Ti | 4.942726  | -1.028149 | 4.054931  |
| Ti | -4.897991 | 6.944437  | 9.997773  |
| O  | -4.923043 | 6.653146  | 11.868042 |
| O  | -6.425886 | 5.963408  | 14.396070 |
| Ti | -4.789178 | 6.686104  | 13.767010 |
| O  | -4.266271 | 8.509653  | 13.851181 |
| O  | -4.153881 | 8.735474  | 9.474315  |
| O  | -3.443309 | 5.889270  | 9.378589  |
| Ti | -1.660281 | 5.757250  | 10.455659 |
| O  | -1.657331 | 5.224086  | 12.336049 |
| O  | -3.252355 | 6.030661  | 14.625339 |
| Ti | -1.591052 | 5.233388  | 14.173739 |
| O  | 0.112148  | 4.104828  | 14.847413 |
| O  | 0.062380  | 4.410544  | 10.151556 |
| Ti | -2.370574 | 9.196145  | 10.150733 |
| O  | -2.890012 | 10.206958 | 11.682178 |
| Ti | -2.653501 | 8.874375  | 12.978467 |
| O  | -2.220375 | 7.619150  | 11.440445 |
| O  | -1.212723 | 9.064080  | 14.083098 |
| O  | -0.733679 | 10.099706 | 9.863478  |
| O  | -0.111976 | 7.091192  | 10.067653 |
| Ti | 0.853052  | 9.147371  | 10.120678 |
| O  | 0.789858  | 8.632993  | 12.029587 |
| O  | -0.133919 | 6.609357  | 14.463917 |
| Ti | 0.592577  | 8.370607  | 13.842700 |

|    |           |           |           |
|----|-----------|-----------|-----------|
| O  | 1.912365  | 9.402785  | 14.797252 |
| O  | 2.432912  | 7.036007  | 13.781724 |
| O  | 2.630346  | 7.592979  | 10.256278 |
| O  | 2.406629  | 10.325198 | 10.150679 |
| O  | 3.993207  | 9.447269  | 12.585510 |
| Ti | 3.719715  | 9.170728  | 10.771702 |
| Ti | 3.491394  | 8.557474  | 14.152517 |
| Ti | 1.523475  | 5.265299  | 14.089909 |
| O  | 1.459301  | 5.049489  | 12.253318 |
| Ti | 1.554474  | 5.785415  | 10.507094 |
| Ti | -8.288001 | 0.583318  | 10.524823 |
| Ti | -7.742124 | 0.988627  | 13.338478 |
| O  | -8.285753 | 2.486947  | 10.026376 |
| Ti | -7.102838 | 4.137275  | 10.283739 |
| O  | -7.673043 | 4.619547  | 12.001928 |
| O  | -7.739089 | 2.688181  | 14.082162 |
| Ti | -6.765437 | 4.274066  | 13.600365 |
| O  | -6.612833 | 0.811807  | 11.745764 |
| O  | -6.586079 | 5.970708  | 9.719146  |
| O  | -5.449469 | 3.300491  | 10.436583 |
| Ti | -3.863384 | 2.248265  | 10.373030 |
| O  | -9.221152 | 0.590254  | 12.158119 |
| O  | -3.095432 | 2.106904  | 12.138617 |
| O  | -5.012195 | 3.675798  | 13.599978 |
| Ti | -3.620866 | 2.343190  | 13.872987 |
| Ti | -5.759224 | -1.089177 | 10.893525 |
| O  | -7.487247 | -1.143520 | 10.147781 |
| O  | -4.872742 | 0.948303  | 14.280112 |
| O  | -3.958393 | -1.554356 | 15.128188 |
| O  | -5.649073 | -1.771567 | 12.652502 |
| Ti | -5.454470 | -0.834462 | 14.257154 |
| O  | -7.310434 | -0.377241 | 14.535690 |
| O  | -4.640927 | 0.385507  | 10.150131 |
| O  | -1.216978 | -2.198593 | 10.361137 |
| O  | -0.925129 | -2.112450 | 14.745739 |
| O  | -1.951476 | 0.848791  | 14.663421 |
| Ti | -2.341357 | -0.963699 | 14.279432 |
| O  | -2.708467 | -0.939866 | 12.445844 |
| O  | -1.930760 | 0.902053  | 10.194835 |
| Ti | -2.602410 | -0.968252 | 10.519554 |
| O  | -4.281339 | -2.170206 | 10.140073 |
| O  | -2.490270 | 3.769999  | 10.142459 |
| O  | -2.309536 | 3.430772  | 14.815626 |
| O  | 1.006170  | 1.412314  | 15.027922 |
| Ti | -0.519638 | 2.260903  | 14.366772 |
| O  | -0.413465 | 2.323537  | 12.521769 |
| O  | 0.896239  | 1.592246  | 10.174146 |
| Ti | -0.699775 | 2.526204  | 10.632365 |
| O  | 3.230710  | 5.033236  | 10.033198 |
| Ti | 4.720365  | 3.975173  | 10.432628 |
| O  | 4.549283  | 3.843147  | 12.339719 |
| O  | 3.049712  | 4.601582  | 14.944927 |

|    |           |           |           |
|----|-----------|-----------|-----------|
| Ti | 4.585827  | 3.813684  | 14.202185 |
| O  | 6.333574  | 2.636750  | 14.735772 |
| O  | 6.494072  | 2.691640  | 9.923873  |
| O  | 5.087074  | 7.908471  | 14.802986 |
| O  | 5.305312  | 8.849091  | 9.902213  |
| O  | 6.148081  | 5.421499  | 10.134320 |
| Ti | 6.647850  | 7.492550  | 10.084485 |
| O  | 6.549663  | 7.202369  | 12.081864 |
| O  | 5.996842  | 5.213890  | 14.458451 |
| Ti | 6.572569  | 7.037953  | 13.926460 |
| O  | 7.995026  | 8.103025  | 14.777615 |
| O  | 8.471865  | 5.680355  | 13.905689 |
| O  | 8.872648  | 5.948990  | 10.151362 |
| O  | 8.233098  | 8.664991  | 10.129795 |
| O  | 9.846138  | 8.201206  | 12.564763 |
| Ti | 9.631608  | 7.680819  | 10.778244 |
| O  | 11.385748 | 7.360833  | 10.219995 |
| Ti | 9.500524  | 7.245987  | 14.109626 |
| O  | 11.205920 | 6.503110  | 14.548397 |
| Ti | 11.767210 | 5.144489  | 13.377436 |
| Ti | 11.705326 | 5.489405  | 10.565223 |
| O  | 12.022904 | 3.506264  | 14.227305 |
| Ti | 10.751435 | 2.108026  | 13.885018 |
| O  | 11.170243 | 1.921417  | 12.050703 |
| O  | 12.228545 | 3.758319  | 9.711529  |
| Ti | 10.993912 | 2.186519  | 10.203792 |
| O  | 10.442265 | 4.989030  | 11.970281 |
| O  | 10.421911 | 0.358684  | 14.517697 |
| O  | 9.214798  | 2.961786  | 14.491647 |
| Ti | 7.644669  | 3.868545  | 13.949989 |
| O  | 12.991177 | 5.584246  | 11.999784 |
| O  | 7.524791  | 3.620167  | 12.136399 |
| O  | 9.389435  | 3.037868  | 9.922846  |
| Ti | 7.894467  | 4.189670  | 10.375804 |
| Ti | 2.494426  | 0.695061  | 10.437119 |
| O  | 2.655510  | 0.884905  | 12.318794 |
| Ti | 2.559274  | 0.754990  | 14.162963 |
| Ti | 0.590538  | -2.746376 | 10.574174 |
| O  | 1.732497  | -1.047198 | 14.067517 |
| O  | 2.287118  | -3.493773 | 14.827037 |
| O  | 0.405924  | -3.300405 | 12.377652 |
| Ti | 0.762460  | -2.655571 | 14.082139 |
| O  | 1.755275  | -1.223784 | 10.332051 |
| Ti | 6.927120  | -3.127936 | 13.416878 |
| O  | 7.232043  | -4.605045 | 12.206583 |
| Ti | 6.951932  | -3.585340 | 10.647498 |
| O  | 6.622764  | -2.065339 | 11.860267 |
| O  | 5.146192  | -3.756110 | 10.013595 |
| O  | 5.390481  | -3.180836 | 14.450321 |
| O  | 4.312470  | -0.550448 | 14.664133 |
| Ti | 3.688218  | -2.343380 | 14.128165 |
| O  | 3.545352  | -2.445665 | 12.272362 |

|    |           |           |           |
|----|-----------|-----------|-----------|
| O  | 4.435691  | -0.731230 | 10.048633 |
| Ti | 3.699559  | -2.592478 | 10.387302 |
| O  | 2.144348  | -3.943223 | 10.133737 |
| O  | 3.978416  | 2.058999  | 10.081406 |
| O  | 3.942238  | 1.991106  | 14.760377 |
| Ti | 9.016018  | -0.764462 | 13.897882 |
| O  | 9.529909  | -0.923136 | 12.107534 |
| O  | 10.659622 | 0.302758  | 9.735888  |
| Ti | 9.126942  | -0.859970 | 10.266229 |
| O  | 8.632413  | -2.791627 | 9.957403  |
| O  | 8.486681  | -2.559400 | 14.286359 |
| O  | 7.402434  | 0.055270  | 14.387998 |
| Ti | 5.680872  | 0.824047  | 14.130666 |
| O  | 5.584852  | 0.885059  | 12.284980 |
| O  | 7.586517  | 0.144975  | 10.146088 |
| Ti | 5.782043  | 0.750577  | 10.398740 |

48c-like 3-D (1,1,2)-mer

|    |           |          |           |
|----|-----------|----------|-----------|
| Ti | -6.940647 | 3.898284 | -1.909434 |
| O  | -7.411591 | 4.028459 | -0.112354 |
| O  | -8.579549 | 2.674776 | 2.298756  |
| Ti | -7.107796 | 3.885618 | 1.751507  |
| O  | -6.585298 | 5.846109 | 1.986320  |
| O  | -6.474431 | 5.697404 | -2.325579 |
| O  | -5.359411 | 3.073873 | -2.512762 |
| Ti | -3.653982 | 2.307980 | -2.238192 |
| O  | -3.520859 | 2.272156 | -0.401260 |
| O  | -5.561500 | 2.857819 | 1.916002  |
| Ti | -3.823880 | 2.130337 | 1.474065  |
| O  | -2.012726 | 0.870864 | 1.786355  |
| O  | -1.928321 | 1.077670 | -2.832375 |
| Ti | -4.918775 | 6.285966 | -1.452609 |
| O  | -5.237752 | 7.736794 | -0.228784 |
| Ti | -4.961717 | 6.686968 | 1.325549  |
| O  | -4.596853 | 5.192069 | 0.058467  |
| O  | -3.169009 | 6.786270 | 1.970441  |
| O  | -3.399123 | 6.325093 | -2.525211 |
| O  | -2.284538 | 3.650323 | -2.813564 |
| Ti | -1.725610 | 5.448871 | -2.210503 |
| O  | -1.593008 | 5.489767 | -0.356035 |
| O  | -2.482775 | 3.670585 | 1.828553  |
| Ti | -1.796035 | 5.562434 | 1.540620  |
| O  | -0.314767 | 7.045903 | 1.752548  |
| O  | 0.219759  | 4.285474 | 1.517289  |
| O  | 0.243458  | 4.155628 | -2.066083 |
| O  | -0.323193 | 6.591425 | -2.916197 |
| O  | 1.555834  | 6.420715 | -0.438967 |
| Ti | 1.196391  | 5.771120 | -2.152451 |
| Ti | 1.209185  | 5.939802 | 1.340950  |
| Ti | -0.527458 | 2.291182 | 1.455685  |
| O  | -0.676611 | 2.094036 | -0.429266 |
| Ti | -0.552576 | 2.356481 | -2.254437 |

|    |            |           |           |
|----|------------|-----------|-----------|
| Ti | -9.547480  | -1.691157 | -0.860638 |
| Ti | -9.417686  | -2.491784 | 1.975043  |
| O  | -10.077768 | -0.197474 | -1.842704 |
| Ti | -8.633573  | 1.070982  | -1.717391 |
| O  | -8.719174  | 1.240143  | 0.120550  |
| O  | -10.021672 | -0.698974 | 2.643370  |
| Ti | -8.680986  | 0.694245  | 2.006039  |
| O  | -8.264438  | -1.229693 | 0.595606  |
| O  | -8.329813  | 2.742452  | -2.517122 |
| O  | -7.276252  | -0.046257 | -2.488074 |
| Ti | -5.644914  | -0.549519 | -1.744077 |
| O  | -10.603927 | -2.511212 | 0.411691  |
| O  | -5.668729  | 0.278342  | -0.109385 |
| O  | -6.970701  | 0.120753  | 2.626181  |
| Ti | -6.022258  | -1.149704 | 1.256194  |
| Ti | -7.165433  | -3.729592 | -1.503061 |
| O  | -8.778591  | -2.937651 | -2.041626 |
| O  | -7.214413  | -2.788552 | 2.075633  |
| O  | -5.964701  | -5.543192 | 2.026564  |
| O  | -7.639038  | -5.040890 | -0.291555 |
| Ti | -7.507647  | -4.729635 | 1.544261  |
| O  | -9.276049  | -4.453376 | 2.047178  |
| O  | -6.249905  | -2.284886 | -0.647708 |
| O  | -2.850203  | -4.841676 | -2.807578 |
| O  | -3.073744  | -5.991060 | 2.052856  |
| O  | -4.397233  | -2.336221 | 1.515565  |
| Ti | -4.322080  | -4.438166 | 2.042302  |
| O  | -4.071753  | -4.280740 | 0.003425  |
| O  | -4.129428  | -2.028939 | -2.226161 |
| Ti | -4.155698  | -3.924907 | -1.786123 |
| O  | -5.841834  | -4.433375 | -2.576235 |
| O  | -4.310972  | 0.454413  | -2.760171 |
| O  | -4.489895  | 0.182541  | 2.044593  |
| O  | -1.376518  | -2.318547 | 2.077452  |
| Ti | -2.768487  | -1.074584 | 1.562677  |
| O  | -2.511367  | -0.816562 | -0.340737 |
| O  | -1.146296  | -1.654299 | -2.960438 |
| Ti | -2.562737  | -0.693251 | -2.193552 |
| O  | 0.964264   | 1.740619  | -3.212753 |
| Ti | 2.413985   | 0.892953  | -2.398710 |
| O  | 2.164565   | 0.829331  | -0.593190 |
| O  | 1.193895   | 1.666439  | 1.753510  |
| Ti | 2.751442   | 0.627824  | 1.268940  |
| O  | 4.453288   | -0.646529 | 1.982416  |
| O  | 4.236734   | -0.222361 | -2.791510 |
| O  | 3.052519   | 6.018881  | 2.017078  |
| O  | 2.855753   | 5.256551  | -2.846647 |
| O  | 3.891021   | 2.338386  | -2.492080 |
| Ti | 4.152014   | 4.169775  | -1.988607 |
| O  | 3.975344   | 4.218805  | -0.138091 |
| O  | 4.011866   | 2.276893  | 1.818642  |
| Ti | 4.077989   | 4.327202  | 1.811521  |

|    |           |           |           |
|----|-----------|-----------|-----------|
| O  | 5.940570  | 5.111174  | 1.812927  |
| O  | 6.828428  | 2.526672  | 1.985640  |
| O  | 6.638361  | 2.406852  | -1.709190 |
| O  | 5.833000  | 4.891626  | -2.563519 |
| O  | 7.675146  | 5.054222  | -0.218584 |
| Ti | 7.357102  | 4.124476  | -1.788777 |
| O  | 9.180583  | 3.648480  | -2.289076 |
| Ti | 7.693755  | 4.205175  | 1.486828  |
| O  | 9.626218  | 4.401220  | 2.176197  |
| Ti | 10.387908 | 2.639266  | 1.686222  |
| Ti | 9.798852  | 2.331045  | -1.133826 |
| O  | 10.172583 | 0.734316  | 2.128199  |
| Ti | 9.039075  | -0.955291 | 1.884694  |
| O  | 9.658013  | -1.356699 | 0.163999  |
| O  | 9.742017  | 0.638607  | -1.877139 |
| Ti | 8.724795  | -0.930098 | -1.408297 |
| O  | 8.717901  | 2.528559  | 0.473927  |
| O  | 8.593497  | -2.826907 | 2.517973  |
| O  | 7.363017  | -0.201830 | 1.638303  |
| Ti | 5.799385  | 0.901479  | 1.679018  |
| O  | 11.307595 | 2.671863  | 0.042141  |
| O  | 4.709096  | 0.835424  | -0.008909 |
| O  | 6.991414  | -0.246401 | -1.485600 |
| Ti | 5.439211  | 0.884343  | -1.708501 |
| Ti | 0.434361  | -2.188341 | -2.082927 |
| O  | 0.362468  | -1.832954 | -0.258956 |
| Ti | 0.466453  | -2.655693 | 1.431014  |
| Ti | -1.260382 | -5.593344 | -2.161833 |
| O  | -0.537595 | -4.567763 | 1.532488  |
| O  | -0.189955 | -7.311895 | 1.785682  |
| O  | -1.786709 | -6.611031 | -0.710104 |
| Ti | -1.550504 | -6.227273 | 1.117003  |
| O  | -0.308294 | -4.028076 | -1.698153 |
| Ti | 4.529519  | -5.962713 | 1.984324  |
| O  | 4.860639  | -7.017320 | 0.399880  |
| Ti | 4.729052  | -5.662591 | -0.862352 |
| O  | 4.266054  | -4.394157 | 0.640339  |
| O  | 3.420894  | -5.865923 | -2.136163 |
| O  | 2.870753  | -6.824667 | 2.387270  |
| O  | 2.094755  | -3.915109 | 1.912849  |
| Ti | 1.252905  | -6.030552 | 1.900082  |
| O  | 1.444841  | -5.597610 | -0.036690 |
| O  | 2.163455  | -3.446965 | -2.415703 |
| Ti | 1.612167  | -5.273196 | -1.835909 |
| O  | 0.335801  | -6.330609 | -2.844360 |
| O  | 1.814431  | -0.987121 | -2.819302 |
| O  | 1.904512  | -1.233912 | 1.784067  |
| Ti | 6.885301  | -3.751780 | 2.172972  |
| O  | 6.848325  | -3.165271 | 0.337712  |
| O  | 8.388559  | -2.609832 | -2.204818 |
| Ti | 6.777922  | -3.369898 | -1.534910 |
| O  | 6.392791  | -5.220054 | -1.603134 |

|    |            |           |           |
|----|------------|-----------|-----------|
| O  | 6.377685   | -5.572791 | 2.302760  |
| O  | 5.354400   | -2.767794 | 2.882861  |
| Ti | 3.664576   | -2.596463 | 1.639442  |
| O  | 3.574752   | -2.028622 | -0.256521 |
| O  | 5.267310   | -2.767985 | -2.474869 |
| Ti | 3.567428   | -2.024830 | -2.087772 |
| Ti | -6.060286  | 5.707850  | 4.088391  |
| O  | -6.596751  | 6.044569  | 5.845651  |
| O  | -7.616187  | 4.366661  | 8.173312  |
| Ti | -6.164155  | 5.610231  | 7.637251  |
| O  | -5.532985  | 7.499413  | 7.953213  |
| O  | -5.152655  | 7.446870  | 3.454556  |
| O  | -4.461977  | 4.735626  | 3.954063  |
| Ti | -2.716291  | 3.921054  | 4.087125  |
| O  | -2.410649  | 3.768128  | 5.907309  |
| O  | -4.623671  | 4.587250  | 7.731347  |
| Ti | -2.794512  | 3.966067  | 7.741413  |
| O  | -1.008780  | 2.610246  | 8.080067  |
| O  | -0.891500  | 2.654349  | 3.616252  |
| Ti | -3.601457  | 7.950346  | 4.499567  |
| O  | -4.058847  | 9.317566  | 5.814856  |
| Ti | -3.798475  | 8.203944  | 7.298580  |
| O  | -3.415897  | 6.787625  | 6.026203  |
| O  | -1.961714  | 8.327359  | 8.081055  |
| O  | -1.930189  | 8.429412  | 3.855717  |
| O  | -1.294049  | 5.347533  | 3.637930  |
| Ti | -0.262003  | 7.474388  | 3.842557  |
| O  | -0.291784  | 7.152034  | 5.767994  |
| O  | -1.358721  | 5.424825  | 8.078821  |
| Ti | -0.396122  | 7.180826  | 7.599192  |
| O  | 1.216035   | 8.460741  | 7.976612  |
| O  | 1.379616   | 5.794450  | 7.894853  |
| O  | 1.278307   | 5.907349  | 3.715804  |
| O  | 1.410868   | 8.507185  | 3.555933  |
| O  | 2.929805   | 7.345366  | 5.792645  |
| Ti | 2.790317   | 7.274329  | 3.895622  |
| Ti | 2.771557   | 7.176159  | 7.640626  |
| Ti | 0.498716   | 3.929096  | 7.703194  |
| O  | 0.533911   | 3.895985  | 5.791289  |
| Ti | 0.548095   | 4.044419  | 3.946322  |
| Ti | -9.465502  | -0.700020 | 4.781439  |
| Ti | -8.471422  | -0.898319 | 7.560765  |
| O  | -9.326716  | 1.113377  | 4.132460  |
| Ti | -8.216842  | 2.750882  | 4.444342  |
| O  | -8.979212  | 2.950811  | 6.167432  |
| O  | -9.220178  | 0.813074  | 8.360561  |
| Ti | -8.168716  | 2.512065  | 7.786745  |
| O  | -7.693958  | -0.944954 | 5.633596  |
| O  | -7.633573  | 4.524343  | 3.791085  |
| O  | -6.506906  | 2.096572  | 4.643325  |
| Ti | -5.249550  | 0.792178  | 3.989312  |
| O  | -10.171034 | -0.795748 | 6.450765  |

|    |           |           |          |
|----|-----------|-----------|----------|
| O  | -4.551577 | 0.541490  | 5.813336 |
| O  | -6.597580 | 1.544704  | 7.775533 |
| Ti | -4.976334 | 0.423232  | 7.585057 |
| Ti | -7.015618 | -2.609296 | 4.338789 |
| O  | -9.029748 | -2.534483 | 4.008462 |
| O  | -6.192615 | -1.242079 | 7.653748 |
| O  | -5.373826 | -3.984323 | 8.402542 |
| O  | -6.963480 | -3.832349 | 5.774312 |
| Ti | -6.724139 | -3.154740 | 7.492213 |
| O  | -8.489376 | -2.748287 | 8.040338 |
| O  | -5.604155 | -1.207147 | 4.274870 |
| O  | -2.874006 | -3.898922 | 3.548083 |
| O  | -2.369847 | -4.143936 | 8.437800 |
| O  | -3.261983 | -0.784206 | 8.229455 |
| Ti | -3.765806 | -2.861003 | 8.334110 |
| O  | -3.765773 | -2.628349 | 6.360267 |
| O  | -2.791791 | -1.003325 | 3.806620 |
| Ti | -3.927826 | -2.425280 | 4.541735 |
| O  | -5.376690 | -3.616255 | 3.669144 |
| O  | -3.551802 | 2.011897  | 3.698294 |
| O  | -3.642094 | 2.003396  | 8.126277 |
| O  | -0.239908 | -0.271921 | 8.150158 |
| Ti | -1.808431 | 0.692718  | 7.823295 |
| O  | -1.814145 | 0.777190  | 5.945255 |
| O  | -0.046878 | 0.098948  | 3.662117 |
| Ti | -1.794458 | 0.748795  | 4.081035 |
| O  | 2.386361  | 3.667489  | 3.269345 |
| Ti | 3.670602  | 2.360002  | 4.038024 |
| O  | 3.428192  | 2.360793  | 5.853043 |
| O  | 2.083243  | 3.029933  | 8.095117 |
| Ti | 3.717000  | 2.125236  | 7.724767 |
| O  | 5.514630  | 0.844693  | 8.157696 |
| O  | 5.506287  | 1.079539  | 3.782869 |
| O  | 4.609725  | 6.742044  | 7.960125 |
| O  | 4.713222  | 7.175020  | 3.658959 |
| O  | 5.047259  | 3.922684  | 3.786985 |
| Ti | 6.074612  | 5.925951  | 3.788397 |
| O  | 6.139265  | 5.564433  | 5.706866 |
| O  | 5.087128  | 3.689964  | 8.003062 |
| Ti | 5.953996  | 5.465160  | 7.546753 |
| O  | 7.616324  | 6.697614  | 8.005343 |
| O  | 7.878987  | 4.137421  | 8.022328 |
| O  | 7.823982  | 4.312687  | 3.838352 |
| O  | 7.776420  | 6.878604  | 3.233527 |
| O  | 9.261518  | 6.314317  | 5.678233 |
| Ti | 9.144259  | 5.810025  | 3.839581 |
| O  | 11.129701 | 5.437315  | 3.992030 |
| Ti | 9.117720  | 5.546197  | 7.378044 |
| O  | 10.802937 | 5.431297  | 8.368879 |
| Ti | 11.727210 | 3.753140  | 7.724577 |
| Ti | 11.442420 | 3.912712  | 4.895543 |
| O  | 11.560944 | 1.884213  | 8.136183 |



|    |           |           |           |
|----|-----------|-----------|-----------|
| Ti | 10.189634 | 0.418075  | 7.748201  |
| O  | 10.850919 | 0.450143  | 5.952440  |
| O  | 11.292204 | 2.477803  | 3.634353  |
| Ti | 10.095873 | 0.830781  | 4.286178  |
| O  | 10.174350 | 3.800336  | 6.372597  |
| O  | 9.613171  | -1.371202 | 8.285747  |
| O  | 8.570606  | 1.307126  | 7.724356  |
| Ti | 6.956347  | 2.301692  | 7.854397  |
| O  | 12.837375 | 3.932477  | 6.209382  |
| O  | 6.356493  | 2.487118  | 6.057342  |
| O  | 8.531520  | 1.749313  | 4.345161  |
| Ti | 6.776408  | 2.638633  | 4.267416  |
| Ti | 1.516613  | -0.829941 | 4.034398  |
| O  | 1.447443  | -1.092468 | 5.917589  |
| Ti | 1.429604  | -1.106905 | 7.767476  |
| Ti | -0.944457 | -3.988320 | 3.701004  |
| O  | 0.325946  | -2.859555 | 8.169934  |
| O  | 0.471452  | -5.554331 | 7.940263  |
| O  | -1.092461 | -4.168370 | 5.609147  |
| Ti | -0.811221 | -4.294218 | 7.435357  |
| O  | 0.560503  | -2.672605 | 3.731000  |
| Ti | 5.276286  | -4.559847 | 7.964504  |
| O  | 5.697191  | -5.629107 | 6.406061  |
| Ti | 5.446189  | -4.328324 | 5.101308  |
| O  | 5.044210  | -3.082024 | 6.556726  |
| O  | 4.029785  | -4.981811 | 3.893182  |
| O  | 3.648548  | -5.437221 | 8.376688  |
| O  | 3.115359  | -2.466979 | 8.198546  |
| Ti | 2.065574  | -4.453084 | 8.122465  |
| O  | 2.195042  | -4.129824 | 6.129093  |
| O  | 3.214755  | -2.306227 | 3.888272  |
| Ti | 2.214923  | -4.061998 | 4.317911  |
| O  | 0.694227  | -5.288968 | 3.758242  |
| O  | 2.929189  | 0.525825  | 3.666998  |
| O  | 2.900891  | 0.256891  | 8.144997  |
| Ti | 8.076909  | -2.645489 | 8.044642  |
| O  | 8.724664  | -2.918741 | 6.295853  |
| O  | 9.655480  | -1.058246 | 3.936686  |
| Ti | 8.219192  | -2.317366 | 4.595307  |
| O  | 7.187420  | -4.061122 | 4.359211  |
| O  | 7.090359  | -4.329419 | 8.689871  |
| O  | 6.540753  | -1.619979 | 8.083156  |
| Ti | 4.651389  | -1.118944 | 7.701692  |
| O  | 4.344877  | -0.570404 | 5.921071  |
| O  | 6.753618  | -1.215537 | 4.561748  |
| Ti | 4.824844  | -0.917455 | 4.129887  |
| Ti | -5.046828 | 7.277550  | 10.017648 |
| O  | -5.694223 | 7.552624  | 11.766156 |
| O  | -6.624916 | 5.693551  | 14.126696 |
| Ti | -5.187778 | 6.950941  | 13.466547 |
| O  | -4.155333 | 8.694013  | 13.702545 |
| O  | -4.057927 | 8.959995  | 9.372745  |

|    |           |           |           |
|----|-----------|-----------|-----------|
| O  | -3.510919 | 6.251999  | 9.980789  |
| Ti | -1.621573 | 5.750577  | 10.362077 |
| O  | -1.313998 | 5.199879  | 12.142250 |
| O  | -3.723283 | 5.847558  | 13.499753 |
| Ti | -1.794912 | 5.549063  | 13.932800 |
| O  | 0.100244  | 4.104845  | 14.398891 |
| O  | 0.127843  | 4.374981  | 9.918533  |
| Ti | -2.243488 | 9.190109  | 10.098217 |
| O  | -2.663284 | 10.259616 | 11.657313 |
| Ti | -2.412991 | 8.958889  | 12.962223 |
| O  | -2.012131 | 7.712395  | 11.507097 |
| O  | -0.996994 | 9.614273  | 14.171050 |
| O  | -0.616699 | 10.069450 | 9.685706  |
| O  | -0.086798 | 7.100315  | 9.863975  |
| Ti | 0.966359  | 9.084933  | 9.939513  |
| O  | 0.836064  | 8.761668  | 11.934031 |
| O  | -0.184727 | 6.937216  | 14.174126 |
| Ti | 0.815613  | 8.692140  | 13.745020 |
| O  | 2.335889  | 9.919476  | 14.306255 |
| O  | 2.468882  | 7.302181  | 14.333487 |
| O  | 2.703551  | 7.491014  | 9.891925  |
| O  | 2.561543  | 10.184442 | 10.122708 |
| O  | 4.120950  | 8.796056  | 12.455532 |
| Ti | 3.842752  | 8.922908  | 10.629019 |
| Ti | 3.973108  | 8.618546  | 14.363922 |
| Ti | 1.513252  | 5.459762  | 14.029012 |
| O  | 1.580068  | 5.725504  | 12.145992 |
| Ti | 1.598711  | 5.739589  | 10.296150 |
| Ti | -8.697145 | 0.881972  | 10.340445 |
| Ti | -8.411671 | 0.722241  | 13.168821 |
| O  | -8.532357 | 2.749872  | 9.927790  |
| Ti | -7.160521 | 4.215761  | 10.315363 |
| O  | -7.824273 | 4.183755  | 12.111413 |
| O  | -8.261390 | 2.157173  | 14.429827 |
| Ti | -7.064306 | 3.804270  | 13.777306 |
| O  | -7.144183 | 0.833611  | 11.691219 |
| O  | -6.583639 | 6.004349  | 9.776585  |
| O  | -5.540931 | 3.327730  | 10.342004 |
| Ti | -3.927768 | 2.331935  | 10.210365 |
| O  | -9.807524 | 0.702764  | 11.855768 |
| O  | -3.324471 | 2.145248  | 12.006359 |
| O  | -5.502593 | 2.884994  | 13.717902 |
| Ti | -3.747300 | 1.994940  | 13.796250 |
| Ti | -6.089585 | -0.913654 | 10.687040 |
| O  | -7.776310 | -0.799699 | 9.698516  |
| O  | -4.793224 | 0.320493  | 14.224284 |
| O  | -4.745721 | -2.243408 | 14.833498 |
| O  | -6.231742 | -1.681855 | 12.387347 |
| Ti | -6.114427 | -1.176169 | 14.225704 |
| O  | -8.099340 | -0.802108 | 14.072140 |
| O  | -4.849673 | 0.495182  | 10.042715 |
| O  | -1.582151 | -2.110662 | 10.101060 |

|    |           |           |           |
|----|-----------|-----------|-----------|
| O  | -1.680032 | -2.537599 | 14.409235 |
| O  | -2.017156 | 0.710267  | 14.276823 |
| Ti | -3.043706 | -1.291397 | 14.277305 |
| O  | -3.107103 | -0.932795 | 12.358174 |
| O  | -2.058114 | 0.942496  | 10.061130 |
| Ti | -2.924752 | -0.831420 | 10.518247 |
| O  | -4.586557 | -2.063866 | 10.060927 |
| O  | -2.484939 | 3.787385  | 9.905604  |
| O  | -2.476502 | 3.553308  | 14.280544 |
| O  | 0.643862  | 0.966327  | 14.796203 |
| Ti | -0.641537 | 2.271980  | 14.025313 |
| O  | -0.399110 | 2.268665  | 12.210404 |
| O  | 0.945845  | 1.601879  | 9.967354  |
| Ti | -0.687886 | 2.506605  | 10.338683 |
| O  | 3.269381  | 4.904287  | 9.917767  |
| Ti | 4.837332  | 3.938537  | 10.240030 |
| O  | 4.848216  | 3.850996  | 12.118415 |
| O  | 3.075631  | 4.527952  | 14.397161 |
| Ti | 4.825894  | 3.881540  | 13.982925 |
| O  | 6.583348  | 2.617790  | 14.366816 |
| O  | 6.672794  | 2.629507  | 9.939349  |
| O  | 5.902602  | 8.531294  | 14.515795 |
| O  | 5.403079  | 8.771797  | 9.629843  |
| O  | 6.291816  | 5.414971  | 9.835185  |
| Ti | 6.800698  | 7.491286  | 9.735383  |
| O  | 6.797725  | 7.258796  | 11.708339 |
| O  | 5.822495  | 5.632461  | 14.259276 |
| Ti | 6.959224  | 7.057176  | 13.526669 |
| O  | 8.405869  | 8.255273  | 14.390942 |
| O  | 8.633096  | 5.839813  | 13.800025 |
| O  | 9.218384  | 5.878862  | 10.415083 |
| O  | 8.404730  | 8.619652  | 9.666489  |
| O  | 9.997964  | 8.466570  | 12.291817 |
| Ti | 9.755873  | 7.789937  | 10.574467 |
| O  | 11.520136 | 7.378241  | 10.024975 |
| Ti | 10.045320 | 7.242335  | 13.727312 |
| O  | 12.058430 | 7.164168  | 14.062969 |
| Ti | 12.492004 | 5.331483  | 13.287497 |
| Ti | 11.497313 | 5.527871  | 10.506964 |
| O  | 12.359821 | 3.517533  | 13.932537 |
| Ti | 11.249246 | 1.879329  | 13.618116 |
| O  | 12.007620 | 1.679868  | 11.895007 |
| O  | 12.250865 | 3.819792  | 9.704649  |
| Ti | 11.199454 | 2.121970  | 10.276893 |
| O  | 10.719597 | 5.576844  | 12.434769 |
| O  | 10.661887 | 0.105287  | 14.267646 |
| O  | 9.541509  | 2.539725  | 13.425040 |
| Ti | 8.279983  | 3.839990  | 14.082989 |
| O  | 13.195480 | 5.428387  | 11.617447 |
| O  | 7.584878  | 4.091415  | 12.256552 |
| O  | 9.629265  | 3.093403  | 10.292062 |
| Ti | 8.004734  | 4.209999  | 10.484783 |

|    |           |           |           |
|----|-----------|-----------|-----------|
| Ti | 2.529793  | 0.702575  | 10.360478 |
| O  | 2.497300  | 0.744477  | 12.272253 |
| Ti | 2.480596  | 0.588616  | 14.116737 |
| Ti | 0.256147  | -2.545861 | 10.421303 |
| O  | 1.748705  | -1.272901 | 14.339044 |
| O  | 1.619179  | -3.874221 | 14.508402 |
| O  | 0.094916  | -2.725914 | 12.267918 |
| Ti | 0.241284  | -2.641864 | 14.164365 |
| O  | 1.647523  | -1.162599 | 10.171991 |
| Ti | 6.629314  | -3.319255 | 13.561458 |
| O  | 7.085416  | -4.686592 | 12.246201 |
| Ti | 6.827525  | -3.571633 | 10.762669 |
| O  | 6.445321  | -2.155793 | 12.035416 |
| O  | 4.991767  | -3.693779 | 9.979202  |
| O  | 4.958161  | -3.793265 | 14.206979 |
| O  | 4.321600  | -0.715482 | 14.427226 |
| Ti | 3.289548  | -2.838273 | 14.220138 |
| O  | 3.320345  | -2.519049 | 12.293648 |
| O  | 4.386453  | -0.791870 | 9.984414  |
| Ti | 3.424402  | -2.548919 | 10.462742 |
| O  | 1.814528  | -3.828655 | 10.084894 |
| O  | 4.038128  | 2.021532  | 9.982516  |
| O  | 3.923508  | 1.975580  | 14.449883 |
| Ti | 9.088279  | -1.078831 | 13.973553 |
| O  | 9.624145  | -1.414676 | 12.216112 |
| O  | 10.643451 | 0.268188  | 9.891257  |
| Ti | 9.192924  | -0.977623 | 10.424675 |
| O  | 8.562491  | -2.867284 | 10.108839 |
| O  | 8.178854  | -2.817231 | 14.609022 |
| O  | 7.490063  | -0.106334 | 14.110309 |
| Ti | 5.745372  | 0.709660  | 13.977370 |
| O  | 5.440752  | 0.862348  | 12.157053 |
| O  | 7.651799  | 0.044553  | 10.331397 |
| Ti | 5.822953  | 0.666680  | 10.322431 |
| Ti | -3.853457 | 8.386733  | 15.889034 |
| O  | -3.815830 | 7.799867  | 17.725200 |
| O  | -5.355071 | 7.244878  | 20.266270 |
| Ti | -3.745061 | 8.003970  | 19.597571 |
| O  | -3.358310 | 9.853679  | 19.668474 |
| O  | -3.344992 | 10.207848 | 15.759277 |
| O  | -2.323971 | 7.400830  | 15.178695 |
| Ti | -0.634738 | 7.228774  | 16.423739 |
| O  | -0.544899 | 6.659777  | 18.319193 |
| O  | -2.235755 | 7.398971  | 20.538469 |
| Ti | -0.536010 | 6.656633  | 20.150498 |
| O  | 1.216004  | 5.619108  | 20.882228 |
| O  | 1.125189  | 5.865006  | 16.278951 |
| Ti | -1.496806 | 10.595984 | 16.078563 |
| O  | -1.826886 | 11.650810 | 17.663508 |
| Ti | -1.695328 | 10.295774 | 18.925538 |
| O  | -1.234798 | 9.026740  | 17.422586 |
| O  | -0.387586 | 10.500147 | 20.199792 |

|    |           |           |           |
|----|-----------|-----------|-----------|
| O  | 0.161918  | 11.457873 | 15.676446 |
| O  | 0.936218  | 8.546490  | 16.151993 |
| Ti | 1.779287  | 10.662030 | 16.163657 |
| O  | 1.587131  | 10.227890 | 18.099781 |
| O  | 0.865999  | 8.079748  | 20.479609 |
| Ti | 1.419705  | 9.904973  | 19.899103 |
| O  | 2.694895  | 10.963466 | 20.907409 |
| O  | 3.339235  | 8.661202  | 19.761542 |
| O  | 3.570459  | 9.199875  | 16.531457 |
| O  | 3.219961  | 11.944249 | 16.277901 |
| O  | 4.818594  | 11.244687 | 18.770792 |
| Ti | 4.583259  | 10.860686 | 16.943676 |
| Ti | 4.291294  | 10.228160 | 20.223110 |
| Ti | 2.595391  | 6.822660  | 20.147150 |
| O  | 2.668212  | 6.466069  | 18.323986 |
| Ti | 2.562556  | 7.287261  | 16.633131 |
| Ti | -7.356552 | 1.995371  | 16.377334 |
| Ti | -6.768289 | 2.303353  | 19.197539 |
| O  | -7.141686 | 3.900844  | 15.935501 |
| Ti | -6.009157 | 5.591655  | 16.179143 |
| O  | -6.627633 | 5.993339  | 17.898705 |
| O  | -6.710954 | 3.996559  | 19.939154 |
| Ti | -5.693958 | 5.566152  | 19.470779 |
| O  | -5.687169 | 2.104917  | 17.590364 |
| O  | -5.561756 | 7.461885  | 15.544350 |
| O  | -4.333983 | 4.836453  | 16.425932 |
| Ti | -2.771058 | 3.732495  | 16.384616 |
| O  | -8.277010 | 1.963291  | 18.020948 |
| O  | -1.679656 | 3.797467  | 18.072245 |
| O  | -3.960599 | 4.880944  | 19.547808 |
| Ti | -2.409429 | 3.749323  | 19.772701 |
| Ti | -4.663059 | 0.428124  | 16.577196 |
| O  | -6.595206 | 0.233643  | 15.887506 |
| O  | -3.608303 | 2.226945  | 19.774948 |
| O  | -2.801766 | -0.259300 | 20.625323 |
| O  | -4.644588 | -0.420511 | 18.282694 |
| Ti | -4.327125 | 0.509262  | 19.853014 |
| O  | -6.150207 | 0.985278  | 20.352590 |
| O  | -3.800685 | 2.107134  | 16.077202 |
| O  | -0.017319 | -1.384852 | 16.048023 |
| O  | 0.175953  | -0.620729 | 20.916297 |
| O  | -0.862535 | 2.294814  | 20.555991 |
| Ti | -1.119849 | 0.462872  | 20.053351 |
| O  | -0.940221 | 0.412620  | 18.203291 |
| O  | -0.983999 | 2.355669  | 16.245787 |
| Ti | -1.045076 | 0.306269  | 16.253078 |
| O  | -2.908395 | -0.475545 | 16.252703 |
| O  | -1.424761 | 5.279704  | 16.081163 |
| O  | -1.206018 | 4.854428  | 20.855582 |
| O  | 2.065204  | 2.891618  | 21.276332 |
| Ti | 0.615453  | 3.739651  | 20.462530 |
| O  | 0.865162  | 3.802178  | 18.657122 |

|    |           |           |           |
|----|-----------|-----------|-----------|
| O  | 1.835330  | 2.965722  | 16.313021 |
| Ti | 0.276950  | 4.004220  | 16.795658 |
| O  | 4.405436  | 6.950710  | 15.986838 |
| Ti | 5.799612  | 5.709047  | 16.501755 |
| O  | 5.538452  | 5.450268  | 18.404790 |
| O  | 4.173787  | 6.286128  | 21.027962 |
| Ti | 5.589308  | 5.327001  | 20.257421 |
| O  | 7.339874  | 4.181116  | 20.824943 |
| O  | 7.520292  | 4.450482  | 16.027429 |
| O  | 5.882388  | 9.477515  | 20.865134 |
| O  | 6.103454  | 10.633175 | 16.000266 |
| O  | 7.425948  | 6.972868  | 16.544950 |
| Ti | 7.349669  | 9.079127  | 16.017417 |
| O  | 7.098830  | 8.919064  | 18.054017 |
| O  | 7.152611  | 6.664932  | 20.293623 |
| Ti | 7.185917  | 8.558175  | 19.843600 |
| O  | 8.866193  | 9.078610  | 20.638243 |
| O  | 9.269167  | 6.929615  | 18.718942 |
| O  | 10.240024 | 7.422217  | 15.988664 |
| O  | 8.990056  | 10.185577 | 16.033467 |
| O  | 10.662584 | 9.679593  | 18.349209 |
| Ti | 10.530475 | 9.363171  | 16.513848 |
| O  | 12.300911 | 9.084032  | 16.018934 |
| Ti | 10.192741 | 8.373342  | 19.568268 |
| O  | 11.805385 | 7.583296  | 20.109057 |
| Ti | 12.578160 | 6.335221  | 18.933061 |
| Ti | 12.447065 | 7.123814  | 16.098027 |
| O  | 13.104438 | 4.836546  | 19.910283 |
| Ti | 11.658261 | 3.572164  | 19.784902 |
| O  | 11.747413 | 3.397997  | 17.944792 |
| O  | 13.047129 | 5.329017  | 15.428904 |
| Ti | 11.711533 | 3.932462  | 16.060297 |
| O  | 11.291978 | 5.876404  | 17.483576 |
| O  | 11.354214 | 1.898515  | 20.577928 |
| O  | 10.304186 | 4.688673  | 20.562162 |
| Ti | 8.674339  | 5.191787  | 19.815808 |
| O  | 13.637897 | 7.148688  | 17.657952 |
| O  | 8.706459  | 4.362543  | 18.181062 |
| O  | 10.002795 | 4.511868  | 15.447845 |
| Ti | 9.051399  | 5.787799  | 16.812150 |
| Ti | 3.556414  | 2.341623  | 16.608429 |
| O  | 3.709176  | 2.540910  | 18.492914 |
| Ti | 3.582250  | 2.277942  | 20.318106 |
| Ti | 1.820361  | -1.307153 | 16.728889 |
| O  | 2.786516  | 0.479886  | 20.126394 |
| O  | 3.355132  | -1.950532 | 20.990706 |
| O  | 1.477242  | -1.789177 | 18.509932 |
| Ti | 1.834985  | -1.135321 | 20.222071 |
| O  | 2.809626  | 0.347037  | 16.547356 |
| Ti | 7.952253  | -1.651326 | 19.513935 |
| O  | 8.268854  | -3.104014 | 18.292043 |
| Ti | 7.990418  | -2.056265 | 16.736676 |

|    |           |           |           |
|----|-----------|-----------|-----------|
| O  | 7.629289  | -0.558645 | 18.002685 |
| O  | 6.195937  | -2.153725 | 16.098101 |
| O  | 6.432167  | -1.688258 | 20.586476 |
| O  | 5.315206  | 0.984591  | 20.877267 |
| Ti | 4.757087  | -0.813661 | 20.275991 |
| O  | 4.619949  | -0.858404 | 18.421704 |
| O  | 5.512433  | 0.960994  | 16.237729 |
| Ti | 4.823179  | -0.929834 | 16.524993 |
| O  | 3.340355  | -2.412976 | 16.310331 |
| O  | 5.042725  | 3.761570  | 16.276984 |
| O  | 4.957584  | 3.555587  | 20.898422 |
| Ti | 9.969502  | 0.739393  | 19.968328 |
| O  | 10.437863 | 0.609312  | 18.171059 |
| O  | 11.614347 | 1.952336  | 15.762616 |
| Ti | 10.135752 | 0.747672  | 16.306343 |
| O  | 9.613520  | -1.214052 | 16.074199 |
| O  | 9.507876  | -1.061056 | 20.385498 |
| O  | 8.388710  | 1.561365  | 20.576928 |
| Ti | 6.684318  | 2.328167  | 20.303470 |
| O  | 6.554109  | 2.363831  | 18.465679 |
| O  | 8.591908  | 1.779354  | 16.141423 |
| Ti | 6.851927  | 2.500394  | 16.590103 |

48c-like 3-D (1,1,3)-mer

|    |           |          |           |
|----|-----------|----------|-----------|
| Ti | -6.960414 | 3.895052 | -1.879173 |
| O  | -7.469878 | 4.055535 | -0.090285 |
| O  | -8.537719 | 2.631930 | 2.326575  |
| Ti | -7.095479 | 3.879491 | 1.757089  |
| O  | -6.606755 | 5.850964 | 2.012491  |
| O  | -6.522419 | 5.679309 | -2.386310 |
| O  | -5.382987 | 3.043583 | -2.459724 |
| Ti | -3.661287 | 2.289142 | -2.235748 |
| O  | -3.498676 | 2.243193 | -0.407065 |
| O  | -5.555064 | 2.835789 | 1.891121  |
| Ti | -3.853884 | 2.032705 | 1.459957  |
| O  | -2.031220 | 0.813991 | 1.752995  |
| O  | -1.933369 | 1.050111 | -2.843424 |
| Ti | -4.972163 | 6.276020 | -1.503367 |
| O  | -5.283786 | 7.726780 | -0.280088 |
| Ti | -5.008953 | 6.675375 | 1.279612  |
| O  | -4.713377 | 5.161683 | -0.006118 |
| O  | -3.215771 | 6.703956 | 1.846003  |
| O  | -3.434181 | 6.297841 | -2.554082 |
| O  | -2.306223 | 3.617035 | -2.860908 |
| Ti | -1.761727 | 5.414027 | -2.259489 |
| O  | -1.620706 | 5.403089 | -0.411379 |
| O  | -2.519695 | 3.596956 | 1.815102  |
| Ti | -1.837890 | 5.478612 | 1.485495  |
| O  | -0.396688 | 6.996862 | 1.686386  |
| O  | 0.170867  | 4.242886 | 1.491647  |
| O  | 0.237862  | 4.125495 | -2.161698 |
| O  | -0.368297 | 6.578696 | -2.951807 |

|    |            |           |           |
|----|------------|-----------|-----------|
| O  | 1.504203   | 6.387855  | -0.495382 |
| Ti | 1.162886   | 5.754854  | -2.216066 |
| Ti | 1.142005   | 5.912948  | 1.284767  |
| Ti | -0.533306  | 2.208158  | 1.449799  |
| O  | -0.664416  | 2.070827  | -0.452472 |
| Ti | -0.552455  | 2.324764  | -2.278267 |
| Ti | -9.505263  | -1.717990 | -0.836062 |
| Ti | -9.360176  | -2.555076 | 1.994461  |
| O  | -10.066749 | -0.216558 | -1.791759 |
| Ti | -8.631117  | 1.060749  | -1.665521 |
| O  | -8.679878  | 1.206161  | 0.173614  |
| O  | -9.977865  | -0.764585 | 2.666770  |
| Ti | -8.632801  | 0.641868  | 2.052519  |
| O  | -8.218445  | -1.268355 | 0.626892  |
| O  | -8.350776  | 2.729006  | -2.474389 |
| O  | -7.257312  | -0.045551 | -2.411829 |
| Ti | -5.612182  | -0.562400 | -1.702593 |
| O  | -10.546289 | -2.568377 | 0.427412  |
| O  | -5.582243  | 0.255295  | -0.054961 |
| O  | -6.930664  | 0.039837  | 2.676393  |
| Ti | -5.989330  | -1.208940 | 1.277636  |
| Ti | -7.128425  | -3.751375 | -1.506215 |
| O  | -8.741625  | -2.950487 | -2.034843 |
| O  | -7.158876  | -2.850124 | 2.093284  |
| O  | -5.906176  | -5.598750 | 2.026517  |
| O  | -7.588453  | -5.071638 | -0.300196 |
| Ti | -7.447417  | -4.784112 | 1.540551  |
| O  | -9.214801  | -4.517714 | 2.047158  |
| O  | -6.224916  | -2.304373 | -0.634934 |
| O  | -2.807036  | -4.844242 | -2.844133 |
| O  | -2.988580  | -6.026902 | 1.976151  |
| O  | -4.369996  | -2.394826 | 1.511390  |
| Ti | -4.264307  | -4.484460 | 2.040736  |
| O  | -4.034000  | -4.330331 | -0.015798 |
| O  | -4.113357  | -2.052030 | -2.209858 |
| Ti | -4.114148  | -3.953519 | -1.796178 |
| O  | -5.806570  | -4.447582 | -2.586379 |
| O  | -4.308176  | 0.429047  | -2.756081 |
| O  | -4.471855  | 0.093287  | 2.113583  |
| O  | -1.336078  | -2.398586 | 2.018457  |
| Ti | -2.737330  | -1.138494 | 1.576036  |
| O  | -2.491759  | -0.859939 | -0.337403 |
| O  | -1.132699  | -1.662341 | -2.991887 |
| Ti | -2.546745  | -0.716962 | -2.188171 |
| O  | 0.955141   | 1.707672  | -3.264395 |
| Ti | 2.428010   | 0.871873  | -2.491605 |
| O  | 2.166588   | 0.778415  | -0.687562 |
| O  | 1.249483   | 1.701928  | 1.670910  |
| Ti | 2.761122   | 0.623748  | 1.169236  |
| O  | 4.469022   | -0.650377 | 1.872434  |
| O  | 4.274093   | -0.229875 | -2.880696 |
| O  | 3.000316   | 6.036681  | 1.929127  |



|    |           |           |           |
|----|-----------|-----------|-----------|
| O  | 2.835042  | 5.259049  | -2.909562 |
| O  | 3.895782  | 2.324319  | -2.567922 |
| Ti | 4.129658  | 4.159508  | -2.069203 |
| O  | 3.950493  | 4.215941  | -0.222496 |
| O  | 4.021138  | 2.279175  | 1.728238  |
| Ti | 4.030130  | 4.340040  | 1.727151  |
| O  | 5.900784  | 5.111090  | 1.733199  |
| O  | 6.824782  | 2.544383  | 1.941336  |
| O  | 6.682559  | 2.371334  | -1.820235 |
| O  | 5.825244  | 4.850974  | -2.644727 |
| O  | 7.650019  | 5.040865  | -0.291310 |
| Ti | 7.358659  | 4.105781  | -1.865759 |
| O  | 9.210451  | 3.655391  | -2.297087 |
| Ti | 7.670770  | 4.235282  | 1.432403  |
| O  | 9.615061  | 4.458730  | 2.117630  |
| Ti | 10.390756 | 2.683233  | 1.706964  |
| Ti | 9.824579  | 2.353374  | -1.120311 |
| O  | 10.180822 | 0.786655  | 2.187312  |
| Ti | 9.052973  | -0.910596 | 1.927794  |
| O  | 9.689110  | -1.319561 | 0.214317  |
| O  | 9.787967  | 0.653948  | -1.849317 |
| Ti | 8.767120  | -0.909775 | -1.371181 |
| O  | 8.732184  | 2.542484  | 0.476157  |
| O  | 8.619147  | -2.779787 | 2.564938  |
| O  | 7.383839  | -0.168850 | 1.631861  |
| Ti | 5.798431  | 0.912702  | 1.601383  |
| O  | 11.324393 | 2.699879  | 0.070463  |
| O  | 4.720911  | 0.851083  | -0.096999 |
| O  | 7.021994  | -0.252687 | -1.479035 |
| Ti | 5.468364  | 0.866174  | -1.788829 |
| Ti | 0.469727  | -2.200038 | -2.164143 |
| O  | 0.391591  | -1.860319 | -0.339046 |
| Ti | 0.505739  | -2.703597 | 1.339341  |
| Ti | -1.201090 | -5.604232 | -2.249476 |
| O  | -0.471822 | -4.621182 | 1.424634  |
| O  | -0.110333 | -7.362666 | 1.666556  |
| O  | -1.718612 | -6.653763 | -0.815821 |
| Ti | -1.483647 | -6.283243 | 1.015322  |
| O  | -0.248227 | -4.049135 | -1.768441 |
| Ti | 4.612034  | -5.954290 | 1.915232  |
| O  | 4.962279  | -7.008879 | 0.330986  |
| Ti | 4.800470  | -5.660671 | -0.933280 |
| O  | 4.324980  | -4.397273 | 0.567207  |
| O  | 3.495874  | -5.875348 | -2.215122 |
| O  | 2.964148  | -6.849901 | 2.284768  |
| O  | 2.143667  | -3.943299 | 1.815272  |
| Ti | 1.336767  | -6.081454 | 1.782258  |
| O  | 1.514552  | -5.642128 | -0.147307 |
| O  | 2.210343  | -3.461678 | -2.515003 |
| Ti | 1.678849  | -5.290780 | -1.944650 |
| O  | 0.393501  | -6.321513 | -2.967061 |
| O  | 1.852510  | -1.015030 | -2.926246 |

|    |           |           |           |
|----|-----------|-----------|-----------|
| O  | 1.921605  | -1.260683 | 1.677216  |
| Ti | 6.926716  | -3.715065 | 2.164876  |
| O  | 6.916911  | -3.145285 | 0.318941  |
| O  | 8.462466  | -2.580540 | -2.197110 |
| Ti | 6.840444  | -3.340808 | -1.554287 |
| O  | 6.463236  | -5.192710 | -1.657709 |
| O  | 6.451549  | -5.546376 | 2.260828  |
| O  | 5.373423  | -2.737085 | 2.803598  |
| Ti | 3.696653  | -2.603072 | 1.550407  |
| O  | 3.601773  | -2.048252 | -0.351162 |
| O  | 5.334273  | -2.755506 | -2.519820 |
| Ti | 3.611055  | -2.038617 | -2.179733 |
| Ti | -6.030996 | 5.708663  | 4.099260  |
| O  | -6.540825 | 6.118352  | 5.850731  |
| O  | -7.533260 | 4.416471  | 8.127175  |
| Ti | -6.088706 | 5.689103  | 7.642090  |
| O  | -5.517575 | 7.582794  | 8.046847  |
| O  | -5.125824 | 7.443218  | 3.451401  |
| O  | -4.448346 | 4.713208  | 3.965439  |
| Ti | -2.723441 | 3.864850  | 4.037429  |
| O  | -2.439792 | 3.573052  | 5.851679  |
| O  | -4.569581 | 4.619155  | 7.707489  |
| Ti | -2.821304 | 3.825056  | 7.671533  |
| O  | -0.984061 | 2.456567  | 8.031929  |
| O  | -0.882442 | 2.605778  | 3.603250  |
| Ti | -3.668820 | 8.010096  | 4.582094  |
| O  | -4.088622 | 9.390028  | 5.883939  |
| Ti | -3.794907 | 8.295881  | 7.393367  |
| O  | -3.444742 | 6.860387  | 6.106806  |
| O  | -2.007576 | 8.375432  | 8.164400  |
| O  | -2.034535 | 8.416529  | 3.831952  |
| O  | -1.345376 | 5.321587  | 3.604099  |
| Ti | -0.360553 | 7.445678  | 3.782427  |
| O  | -0.390933 | 7.174557  | 5.708034  |
| O  | -1.425484 | 5.334075  | 7.963509  |
| Ti | -0.579157 | 7.181718  | 7.551997  |
| O  | 1.038166  | 8.484135  | 7.906280  |
| O  | 1.233367  | 5.783107  | 7.794036  |
| O  | 1.228639  | 5.909984  | 3.649470  |
| O  | 1.285760  | 8.503085  | 3.400935  |
| O  | 2.797782  | 7.502860  | 5.640702  |
| Ti | 2.707886  | 7.323432  | 3.758829  |
| Ti | 2.539786  | 7.211689  | 7.461367  |
| Ti | 0.454264  | 3.865204  | 7.628481  |
| O  | 0.495297  | 3.913272  | 5.718884  |
| Ti | 0.534773  | 4.034643  | 3.876289  |
| Ti | -9.417584 | -0.775984 | 4.784240  |
| Ti | -8.466720 | -0.970790 | 7.556439  |
| O  | -9.274396 | 1.054728  | 4.159828  |
| Ti | -8.162977 | 2.700305  | 4.452173  |
| O  | -8.929964 | 2.978593  | 6.151017  |
| O  | -9.110793 | 0.828840  | 8.266621  |

|    |            |           |          |
|----|------------|-----------|----------|
| Ti | -8.069377  | 2.543514  | 7.748729 |
| O  | -7.655068  | -0.992609 | 5.631233 |
| O  | -7.566465  | 4.478101  | 3.819657 |
| O  | -6.460449  | 2.019131  | 4.673189 |
| Ti | -5.207175  | 0.704532  | 4.049963 |
| O  | -10.153680 | -0.897495 | 6.442655 |
| O  | -4.389577  | 0.501928  | 5.818310 |
| O  | -6.479534  | 1.606495  | 7.750449 |
| Ti | -4.953836  | 0.365294  | 7.570887 |
| Ti | -6.944237  | -2.683109 | 4.364819 |
| O  | -8.962671  | -2.612614 | 4.018525 |
| O  | -6.211899  | -1.224901 | 7.652444 |
| O  | -5.280532  | -4.000770 | 8.425291 |
| O  | -6.882835  | -3.881522 | 5.812722 |
| Ti | -6.634364  | -3.182073 | 7.527812 |
| O  | -8.424372  | -2.819911 | 8.046226 |
| O  | -5.522731  | -1.289817 | 4.370097 |
| O  | -2.823740  | -3.938628 | 3.518323 |
| O  | -2.331081  | -4.461433 | 8.296701 |
| O  | -3.287857  | -0.842435 | 8.199304 |
| Ti | -3.594104  | -2.972474 | 8.426919 |
| O  | -3.632869  | -2.720796 | 6.416834 |
| O  | -2.717884  | -1.081750 | 3.838604 |
| Ti | -3.844452  | -2.509339 | 4.613068 |
| O  | -5.303634  | -3.679370 | 3.691360 |
| O  | -3.516277  | 1.919250  | 3.692874 |
| O  | -3.576079  | 1.887315  | 8.130874 |
| O  | -0.370083  | -0.692159 | 8.429905 |
| Ti | -1.755955  | 0.536003  | 7.832986 |
| O  | -1.507783  | 0.597431  | 5.970798 |
| O  | -0.062046  | 0.104675  | 3.395901 |
| Ti | -1.770694  | 0.694615  | 4.108383 |
| O  | 2.373959   | 3.689968  | 3.160002 |
| Ti | 3.639842   | 2.346642  | 3.929169 |
| O  | 3.216965   | 2.305384  | 5.707753 |
| O  | 2.025844   | 2.955197  | 8.015408 |
| Ti | 3.664133   | 2.073185  | 7.548588 |
| O  | 5.437746   | 0.801966  | 8.021715 |
| O  | 5.482709   | 1.077357  | 3.696549 |
| O  | 4.348880   | 6.681852  | 7.731879 |
| O  | 4.645662   | 7.188260  | 3.577773 |
| O  | 4.999705   | 3.933691  | 3.705153 |
| Ti | 6.001242   | 5.937440  | 3.710106 |
| O  | 6.094852   | 5.532056  | 5.596338 |
| O  | 4.985440   | 3.665701  | 7.847335 |
| Ti | 5.766948   | 5.509074  | 7.450169 |
| O  | 7.424215   | 6.737479  | 7.798392 |
| O  | 7.767886   | 4.114571  | 7.830360 |
| O  | 7.804381   | 4.334778  | 3.786314 |
| O  | 7.704006   | 6.872957  | 3.077709 |
| O  | 9.181570   | 6.471033  | 5.533997 |
| Ti | 9.089948   | 5.862500  | 3.726431 |

|    |           |           |          |
|----|-----------|-----------|----------|
| O  | 11.070181 | 5.480876  | 3.995386 |
| Ti | 8.915831  | 5.617377  | 7.169285 |
| O  | 10.582979 | 5.763927  | 8.267274 |
| Ti | 11.506307 | 4.045223  | 7.848462 |
| Ti | 11.356362 | 3.996686  | 4.966793 |
| O  | 11.408071 | 2.110137  | 8.172088 |
| Ti | 10.164370 | 0.526045  | 7.765768 |
| O  | 10.878848 | 0.545785  | 5.989997 |
| O  | 11.257072 | 2.566075  | 3.688293 |
| Ti | 10.071122 | 0.903464  | 4.337924 |
| O  | 10.015520 | 3.898871  | 6.392346 |
| O  | 9.597023  | -1.290037 | 8.318339 |
| O  | 8.492210  | 1.298121  | 7.622817 |
| Ti | 6.857330  | 2.277303  | 7.664587 |
| O  | 12.667683 | 4.168684  | 6.363309 |
| O  | 6.120395  | 2.396615  | 5.919116 |
| O  | 8.505763  | 1.830323  | 4.392879 |
| Ti | 6.736814  | 2.665110  | 4.181746 |
| Ti | 1.466392  | -0.836246 | 3.885427 |
| O  | 1.242487  | -0.983423 | 5.784126 |
| Ti | 1.411434  | -1.213919 | 7.592433 |
| Ti | -0.887012 | -4.090335 | 3.583281 |
| O  | 0.272426  | -3.022218 | 7.798017 |
| O  | 0.532594  | -5.751063 | 7.838826 |
| O  | -1.083269 | -4.522572 | 5.436640 |
| Ti | -0.828244 | -4.597435 | 7.263993 |
| O  | 0.578051  | -2.729483 | 3.672644 |
| Ti | 5.260509  | -4.549309 | 8.004385 |
| O  | 5.715186  | -5.641444 | 6.454360 |
| Ti | 5.462087  | -4.372558 | 5.125076 |
| O  | 5.050841  | -3.096139 | 6.547316 |
| O  | 4.107974  | -4.994393 | 3.836215 |
| O  | 3.633008  | -5.446281 | 8.386794 |
| O  | 3.046929  | -2.518671 | 8.042853 |
| Ti | 2.025367  | -4.536494 | 8.019982 |
| O  | 2.246856  | -4.192471 | 6.025805 |
| O  | 3.193537  | -2.312620 | 3.793473 |
| Ti | 2.265119  | -4.095178 | 4.221522 |
| O  | 0.791332  | -5.354649 | 3.634641 |
| O  | 2.925050  | 0.487676  | 3.557279 |
| O  | 2.801386  | 0.211755  | 7.960529 |
| Ti | 8.042593  | -2.570150 | 8.100191 |
| O  | 8.678185  | -2.852782 | 6.342437 |
| O  | 9.614886  | -0.981031 | 3.999925 |
| Ti | 8.183973  | -2.268936 | 4.631510 |
| O  | 7.176953  | -4.030519 | 4.368076 |
| O  | 7.044094  | -4.248772 | 8.744671 |
| O  | 6.505962  | -1.550286 | 8.106317 |
| Ti | 4.603859  | -1.165310 | 7.614625 |
| O  | 4.247669  | -0.647638 | 5.823516 |
| O  | 6.713737  | -1.183287 | 4.549922 |
| Ti | 4.793312  | -0.914926 | 4.040446 |

|    |           |           |           |
|----|-----------|-----------|-----------|
| Ti | -5.010492 | 7.330063  | 10.123576 |
| O  | -5.619973 | 7.574570  | 11.878650 |
| O  | -6.645582 | 5.856669  | 14.184292 |
| Ti | -5.161237 | 7.105735  | 13.651939 |
| O  | -4.419728 | 8.957795  | 13.913268 |
| O  | -4.052244 | 9.030508  | 9.516544  |
| O  | -3.456271 | 6.304919  | 10.010015 |
| Ti | -1.650090 | 5.635468  | 10.215318 |
| O  | -1.415094 | 5.380913  | 12.047676 |
| O  | -3.637694 | 6.077136  | 13.755993 |
| Ti | -1.750345 | 5.602715  | 13.885020 |
| O  | 0.032067  | 4.221760  | 14.263851 |
| O  | 0.095263  | 4.286408  | 9.823071  |
| Ti | -2.360253 | 9.388039  | 10.428880 |
| O  | -2.852502 | 10.743381 | 11.780663 |
| Ti | -2.653734 | 9.625498  | 13.254617 |
| O  | -2.243585 | 8.219133  | 11.980767 |
| O  | -0.849632 | 9.817705  | 14.114122 |
| O  | -0.680190 | 10.030917 | 9.879933  |
| O  | -0.199430 | 7.038846  | 9.792023  |
| Ti | 0.938770  | 9.036411  | 9.907749  |
| O  | 0.921759  | 8.708666  | 11.862448 |
| O  | -0.297283 | 7.047438  | 14.240509 |
| Ti | 0.812357  | 8.759720  | 13.687612 |
| O  | 2.439809  | 9.949983  | 14.193676 |
| O  | 2.444931  | 7.364932  | 14.160550 |
| O  | 2.659588  | 7.408893  | 9.712522  |
| O  | 2.630508  | 10.036692 | 9.923154  |
| O  | 4.172978  | 8.695436  | 12.254539 |
| Ti | 3.925556  | 8.764947  | 10.419593 |
| Ti | 4.053488  | 8.593738  | 14.163508 |
| Ti | 1.494690  | 5.554292  | 13.892219 |
| O  | 1.392450  | 5.758978  | 12.018291 |
| Ti | 1.523392  | 5.720297  | 10.168700 |
| Ti | -8.691110 | 0.919474  | 10.273201 |
| Ti | -8.405195 | 0.813900  | 13.095278 |
| O  | -8.510159 | 2.794869  | 9.860630  |
| Ti | -7.117954 | 4.244541  | 10.259639 |
| O  | -7.758323 | 4.285826  | 12.062721 |
| O  | -8.310698 | 2.300556  | 14.293999 |
| Ti | -7.095296 | 3.999524  | 13.780648 |
| O  | -7.142073 | 0.875526  | 11.602955 |
| O  | -6.515146 | 6.043819  | 9.799154  |
| O  | -5.521236 | 3.326272  | 10.276154 |
| Ti | -3.940410 | 2.264246  | 10.234987 |
| O  | -9.809297 | 0.771350  | 11.780457 |
| O  | -3.486608 | 2.205303  | 12.058834 |
| O  | -5.543805 | 3.043393  | 13.959953 |
| Ti | -3.836341 | 2.075712  | 13.877841 |
| Ti | -6.182744 | -0.978702 | 10.676805 |
| O  | -7.869447 | -0.832505 | 9.690114  |
| O  | -4.866604 | 0.381785  | 13.901301 |

|    |           |           |           |
|----|-----------|-----------|-----------|
| O  | -4.780044 | -2.214645 | 14.690551 |
| O  | -6.392254 | -1.741442 | 12.344901 |
| Ti | -6.103382 | -1.073173 | 14.137323 |
| O  | -8.102328 | -0.659304 | 14.076589 |
| O  | -4.875117 | 0.437393  | 10.085794 |
| O  | -1.983781 | -2.387759 | 9.823877  |
| O  | -1.582288 | -2.368242 | 14.428314 |
| O  | -2.133730 | 0.799187  | 14.424439 |
| Ti | -3.086658 | -1.188318 | 14.319594 |
| O  | -3.025466 | -0.963899 | 12.348726 |
| O  | -2.086373 | 0.836583  | 10.063094 |
| Ti | -3.084723 | -0.856768 | 10.529820 |
| O  | -4.696657 | -2.109366 | 10.060923 |
| O  | -2.513887 | 3.709333  | 9.830388  |
| O  | -2.553258 | 3.639949  | 14.331945 |
| O  | 0.888539  | 1.369445  | 14.247812 |
| Ti | -0.710856 | 2.289746  | 14.013694 |
| O  | -0.814231 | 2.406395  | 12.144905 |
| O  | 0.907006  | 1.513899  | 9.992640  |
| Ti | -0.711559 | 2.422980  | 10.286051 |
| O  | 3.150837  | 4.803318  | 9.841944  |
| Ti | 4.752239  | 3.885731  | 10.070906 |
| O  | 4.862786  | 3.768493  | 11.938918 |
| O  | 3.130508  | 4.659155  | 14.084883 |
| Ti | 4.749027  | 3.750451  | 13.797392 |
| O  | 6.550940  | 2.466103  | 14.253622 |
| O  | 6.593106  | 2.536490  | 9.750291  |
| O  | 6.021434  | 8.562511  | 14.264018 |
| O  | 5.620420  | 8.548333  | 9.651962  |
| O  | 6.172430  | 5.378517  | 9.657958  |
| Ti | 7.122666  | 7.366560  | 9.761619  |
| O  | 7.062200  | 7.139687  | 11.732516 |
| O  | 6.124642  | 5.340188  | 14.018851 |
| Ti | 7.121486  | 7.034018  | 13.551639 |
| O  | 8.731736  | 8.286552  | 14.023890 |
| O  | 8.911974  | 5.740866  | 13.998379 |
| O  | 8.910119  | 5.797819  | 10.178347 |
| O  | 8.813080  | 8.397078  | 9.395951  |
| O  | 10.424281 | 7.923735  | 11.745307 |
| Ti | 10.140521 | 7.257760  | 9.952137  |
| O  | 12.135846 | 6.842604  | 10.014024 |
| Ti | 10.220788 | 7.158049  | 13.412984 |
| O  | 11.911154 | 7.010237  | 14.396154 |
| Ti | 12.729881 | 5.258043  | 13.812686 |
| Ti | 12.438159 | 5.366688  | 10.991760 |
| O  | 12.546816 | 3.382504  | 14.222632 |
| Ti | 11.155542 | 1.931951  | 13.825850 |
| O  | 11.792938 | 1.897634  | 12.021181 |
| O  | 12.348144 | 3.881868  | 9.790519  |
| Ti | 11.134631 | 2.181406  | 10.301017 |
| O  | 11.177119 | 5.304704  | 12.486148 |
| O  | 10.558427 | 0.130700  | 14.287021 |

|    |           |           |           |
|----|-----------|-----------|-----------|
| O  | 9.556050  | 2.844725  | 13.809859 |
| Ti | 7.978918  | 3.912540  | 13.847272 |
| O  | 13.845279 | 5.407452  | 12.303205 |
| O  | 7.532267  | 3.971661  | 12.022655 |
| O  | 9.582649  | 3.135399  | 10.117582 |
| Ti | 7.875696  | 4.103791  | 10.201958 |
| Ti | 2.543268  | 0.620617  | 10.190469 |
| O  | 2.640435  | 0.416304  | 12.064957 |
| Ti | 2.513951  | 0.452030  | 13.915323 |
| Ti | -0.014889 | -2.421008 | 9.919554  |
| O  | 1.379629  | -1.237802 | 14.372549 |
| O  | 1.407456  | -3.864338 | 14.162460 |
| O  | -0.130411 | -2.528771 | 11.828177 |
| Ti | 0.112919  | -2.592754 | 13.663646 |
| O  | 1.593550  | -1.191532 | 9.923702  |
| Ti | 6.399818  | -3.210684 | 13.661378 |
| O  | 6.894421  | -4.564549 | 12.308322 |
| Ti | 6.695783  | -3.446597 | 10.834476 |
| O  | 6.282700  | -2.042099 | 12.108808 |
| O  | 4.894727  | -3.641035 | 9.970685  |
| O  | 4.718117  | -3.859711 | 14.203907 |
| O  | 4.236640  | -0.865490 | 14.292897 |
| Ti | 3.100374  | -2.866022 | 14.175729 |
| O  | 3.118144  | -2.535701 | 12.221807 |
| O  | 4.335849  | -0.872159 | 9.845023  |
| Ti | 3.228845  | -2.586264 | 10.396724 |
| O  | 1.602918  | -3.776259 | 9.888922  |
| O  | 4.006356  | 1.954036  | 9.818909  |
| O  | 3.941525  | 1.885602  | 14.260813 |
| Ti | 9.052551  | -1.153712 | 13.961871 |
| O  | 9.662858  | -1.394665 | 12.206629 |
| O  | 10.686748 | 0.322730  | 9.900433  |
| Ti | 9.201791  | -0.926648 | 10.434049 |
| O  | 8.460821  | -2.778354 | 10.174977 |
| O  | 8.096932  | -2.853941 | 14.568442 |
| O  | 7.496712  | -0.129282 | 14.074224 |
| Ti | 5.689254  | 0.537207  | 13.868958 |
| O  | 5.449915  | 0.792753  | 12.037105 |
| O  | 7.675869  | 0.099072  | 10.331128 |
| Ti | 5.788603  | 0.573492  | 10.199937 |
| Ti | -4.000425 | 8.749674  | 15.987165 |
| O  | -4.636035 | 9.037915  | 17.743933 |
| O  | -5.575033 | 7.163872  | 20.085630 |
| Ti | -4.143097 | 8.450884  | 19.454353 |
| O  | -3.133730 | 10.211799 | 19.716222 |
| O  | -2.998191 | 10.426886 | 15.340779 |
| O  | -2.465459 | 7.727513  | 15.981276 |
| Ti | -0.562553 | 7.340392  | 16.469585 |
| O  | -0.207010 | 6.822794  | 18.261124 |
| O  | -2.673297 | 7.364214  | 19.535517 |
| Ti | -0.752666 | 7.093610  | 20.044283 |
| O  | 1.115270  | 5.689711  | 20.529507 |

|    |           |           |           |
|----|-----------|-----------|-----------|
| O  | 1.239439  | 5.962558  | 16.122413 |
| Ti | -1.212975 | 10.725314 | 16.079470 |
| O  | -1.668162 | 11.818476 | 17.628078 |
| Ti | -1.418342 | 10.548910 | 18.957802 |
| O  | -1.007980 | 9.271837  | 17.537511 |
| O  | -0.062916 | 11.170489 | 20.245584 |
| O  | 0.413710  | 11.623883 | 15.697201 |
| O  | 0.995612  | 8.692898  | 16.043506 |
| Ti | 2.019849  | 10.711326 | 16.064353 |
| O  | 1.797354  | 10.362810 | 18.056952 |
| O  | 0.849710  | 8.487456  | 20.291990 |
| Ti | 1.778749  | 10.270139 | 19.862514 |
| O  | 3.252496  | 11.530767 | 20.447368 |
| O  | 3.465256  | 8.904189  | 20.411007 |
| O  | 3.770293  | 9.196635  | 16.285757 |
| O  | 3.512075  | 11.927038 | 16.246109 |
| O  | 5.127293  | 10.693499 | 18.645419 |
| Ti | 4.872287  | 10.771666 | 16.817821 |
| Ti | 4.930790  | 10.264908 | 20.499245 |
| Ti | 2.576203  | 7.010293  | 20.199833 |
| O  | 2.801836  | 7.156622  | 18.301237 |
| Ti | 2.630248  | 7.387005  | 16.493879 |
| Ti | -7.463061 | 2.134976  | 16.233137 |
| Ti | -7.311678 | 2.182838  | 19.115546 |
| O  | -7.361670 | 4.069396  | 15.909383 |
| Ti | -6.121080 | 5.653858  | 16.320394 |
| O  | -6.837976 | 5.636426  | 18.094458 |
| O  | -7.215470 | 3.614785  | 20.393991 |
| Ti | -6.031139 | 5.278956  | 19.747275 |
| O  | -5.971633 | 2.280480  | 17.689919 |
| O  | -5.554569 | 7.470079  | 15.768317 |
| O  | -4.449506 | 4.881401  | 16.464309 |
| Ti | -2.817528 | 3.897595  | 16.419647 |
| O  | -8.622408 | 2.010812  | 17.719387 |
| O  | -2.080074 | 3.779013  | 18.165423 |
| O  | -4.465659 | 4.352973  | 19.693424 |
| Ti | -2.697885 | 3.515397  | 19.902912 |
| Ti | -4.871683 | 0.559942  | 16.915568 |
| O  | -6.540581 | 0.416238  | 15.816930 |
| O  | -3.765195 | 1.845953  | 20.296536 |
| O  | -3.660955 | -0.689690 | 21.009384 |
| O  | -5.139275 | -0.292138 | 18.551507 |
| Ti | -5.049308 | 0.316914  | 20.358924 |
| O  | -7.028819 | 0.698880  | 20.089157 |
| O  | -3.728285 | 2.062314  | 16.251004 |
| O  | -0.306233 | -0.508865 | 16.352161 |
| O  | -0.605059 | -1.007200 | 20.504567 |
| O  | -0.959128 | 2.245343  | 20.377671 |
| Ti | -1.958684 | 0.246377  | 20.373269 |
| O  | -2.054037 | 0.645267  | 18.485523 |
| O  | -0.943866 | 2.509476  | 16.236905 |
| Ti | -1.723051 | 0.664584  | 16.631273 |



|    |           |           |           |
|----|-----------|-----------|-----------|
| O  | -3.382227 | -0.561732 | 16.283851 |
| O  | -1.398036 | 5.372993  | 16.063303 |
| O  | -1.442381 | 5.101995  | 20.388742 |
| O  | 1.665841  | 2.488066  | 20.926081 |
| Ti | 0.398497  | 3.831891  | 20.156202 |
| O  | 0.822150  | 3.871914  | 18.377240 |
| O  | 2.015664  | 3.223467  | 16.067373 |
| Ti | 0.374936  | 4.102935  | 16.536335 |
| O  | 4.408915  | 6.864486  | 15.654944 |
| Ti | 5.797580  | 5.637985  | 16.249396 |
| O  | 5.553168  | 5.574828  | 18.112637 |
| O  | 4.103817  | 6.066831  | 20.686542 |
| Ti | 5.813593  | 5.477319  | 19.975401 |
| O  | 7.557927  | 4.252610  | 20.389266 |
| O  | 7.616398  | 4.288383  | 15.952834 |
| O  | 6.866812  | 10.113315 | 20.567494 |
| O  | 6.375184  | 10.637360 | 15.785188 |
| O  | 7.330266  | 7.018142  | 15.889367 |
| Ti | 7.636154  | 9.146447  | 15.660803 |
| O  | 7.676207  | 8.894888  | 17.671584 |
| O  | 6.757028  | 7.255073  | 20.247987 |
| Ti | 7.885151  | 8.681124  | 19.475650 |
| O  | 9.347259  | 9.850845  | 20.396704 |
| O  | 9.563142  | 7.460795  | 19.718876 |
| O  | 10.258176 | 7.395817  | 16.429535 |
| O  | 9.325977  | 10.168912 | 15.662506 |
| O  | 10.927521 | 10.054338 | 18.275668 |
| Ti | 10.679673 | 9.353889  | 16.561485 |
| O  | 12.471028 | 8.995378  | 16.041134 |
| Ti | 10.985206 | 8.854107  | 19.722958 |
| O  | 13.002533 | 8.779360  | 20.072593 |
| Ti | 13.455015 | 6.944475  | 19.303900 |
| Ti | 12.511312 | 7.146096  | 16.527720 |
| O  | 13.324746 | 5.113581  | 19.934019 |
| Ti | 12.212326 | 3.472023  | 19.636331 |
| O  | 12.972468 | 3.200050  | 17.933880 |
| O  | 13.155592 | 5.346060  | 15.817968 |
| Ti | 12.112394 | 3.633043  | 16.335839 |
| O  | 11.695223 | 7.164408  | 18.453537 |
| O  | 11.608322 | 1.695628  | 20.265597 |
| O  | 10.508874 | 4.152607  | 19.417112 |
| Ti | 9.251107  | 5.464052  | 20.039708 |
| O  | 14.194440 | 7.067467  | 17.647338 |
| O  | 8.438077  | 5.668526  | 18.269509 |
| O  | 10.521626 | 4.568096  | 16.335360 |
| Ti | 8.994210  | 5.807917  | 16.515699 |
| Ti | 3.583674  | 2.307880  | 16.454056 |
| O  | 3.544910  | 2.264713  | 18.364896 |
| Ti | 3.502985  | 2.141847  | 20.207048 |
| Ti | 1.501970  | -1.044102 | 16.622283 |
| O  | 2.804653  | 0.266114  | 20.431137 |
| O  | 2.756270  | -2.326804 | 20.681328 |

|    |           |           |           |
|----|-----------|-----------|-----------|
| O  | 1.239612  | -1.346734 | 18.440869 |
| Ti | 1.331545  | -1.150519 | 20.320754 |
| O  | 2.803772  | 0.388895  | 16.294271 |
| Ti | 7.703351  | -1.829108 | 19.501615 |
| O  | 8.129889  | -3.208461 | 18.201508 |
| Ti | 7.834807  | -2.118760 | 16.689938 |
| O  | 7.474002  | -0.683711 | 17.972302 |
| O  | 6.047819  | -2.205189 | 15.911313 |
| O  | 6.072122  | -2.240981 | 20.253419 |
| O  | 5.381675  | 0.852685  | 20.480383 |
| Ti | 4.399789  | -1.266722 | 20.300362 |
| O  | 4.430942  | -0.998008 | 18.374212 |
| O  | 5.463691  | 0.839001  | 16.118327 |
| Ti | 4.619832  | -1.009879 | 16.529960 |
| O  | 3.004359  | -2.314869 | 16.177945 |
| O  | 5.022738  | 3.717960  | 16.050118 |
| O  | 4.925336  | 3.567030  | 20.482761 |
| Ti | 10.071598 | 0.468082  | 19.987490 |
| O  | 10.577189 | 0.053961  | 18.236132 |
| O  | 11.574074 | 1.760109  | 15.957836 |
| Ti | 10.129539 | 0.486902  | 16.444038 |
| O  | 9.558864  | -1.406737 | 16.040185 |
| O  | 9.156535  | -1.262763 | 20.636769 |
| O  | 8.485116  | 1.458634  | 20.119746 |
| Ti | 6.761281  | 2.307252  | 20.046224 |
| O  | 6.479326  | 2.597055  | 18.231203 |
| O  | 8.609147  | 1.554511  | 16.377106 |
| Ti | 6.860401  | 2.349130  | 16.410599 |
| Ti | -2.883305 | 9.896007  | 21.917793 |
| O  | -2.875277 | 9.328408  | 23.764632 |
| O  | -4.418578 | 8.761736  | 26.280410 |
| Ti | -2.797136 | 9.522848  | 25.637583 |
| O  | -2.419816 | 11.374746 | 25.740363 |
| O  | -2.404139 | 11.727315 | 21.819581 |
| O  | -1.330672 | 8.916416  | 21.281740 |
| Ti | 0.347202  | 8.781804  | 22.533431 |
| O  | 0.440770  | 8.227017  | 24.434470 |
| O  | -1.290503 | 8.936636  | 26.602543 |
| Ti | 0.432367  | 8.218742  | 26.263106 |
| O  | 2.190165  | 7.192456  | 27.008402 |
| O  | 2.120252  | 7.438222  | 22.405214 |
| Ti | -0.565319 | 12.134043 | 22.167126 |
| O  | -0.913006 | 13.189368 | 23.751491 |
| Ti | -0.755715 | 11.839953 | 25.016267 |
| O  | -0.280813 | 10.577018 | 23.515808 |
| O  | 0.549407  | 12.052308 | 26.297057 |
| O  | 1.082278  | 13.029345 | 21.795915 |
| O  | 1.900654  | 10.121404 | 22.267878 |
| Ti | 2.709058  | 12.260697 | 22.300279 |
| O  | 2.532095  | 11.820603 | 24.229960 |
| O  | 1.834045  | 9.640595  | 26.596758 |
| Ti | 2.368002  | 11.470123 | 26.027364 |

|    |           |           |           |
|----|-----------|-----------|-----------|
| O  | 3.654010  | 12.500204 | 27.049480 |
| O  | 4.292042  | 10.227168 | 25.850431 |
| O  | 4.515368  | 10.799074 | 22.655256 |
| O  | 4.153855  | 13.542444 | 22.417812 |
| O  | 5.764461  | 12.829450 | 24.898180 |
| Ti | 5.528472  | 12.460821 | 23.066484 |
| Ti | 5.247855  | 11.780800 | 26.332549 |
| Ti | 3.573240  | 8.378144  | 26.244969 |
| O  | 3.650381  | 8.035936  | 24.420626 |
| Ti | 3.537858  | 8.880266  | 22.742346 |
| Ti | -6.350974 | 3.497019  | 22.374590 |
| Ti | -5.786102 | 3.827765  | 25.201603 |
| O  | -6.141303 | 5.394484  | 21.897833 |
| Ti | -5.012507 | 7.091827  | 22.157265 |
| O  | -5.650691 | 7.503876  | 23.869788 |
| O  | -5.748606 | 5.528007  | 25.928950 |
| Ti | -4.726039 | 7.092107  | 25.454296 |
| O  | -4.692173 | 3.636505  | 23.607155 |
| O  | -4.577180 | 8.961253  | 21.519969 |
| O  | -3.344051 | 6.348522  | 22.455151 |
| Ti | -1.758326 | 5.267948  | 22.484445 |
| O  | -7.285965 | 3.480080  | 24.010189 |
| O  | -0.678790 | 5.328226  | 24.182064 |
| O  | -2.980731 | 6.434578  | 25.561795 |
| Ti | -1.427273 | 5.316031  | 25.873849 |
| Ti | -3.629722 | 1.945007  | 22.652092 |
| O  | -5.573961 | 1.720620  | 21.965969 |
| O  | -2.642426 | 3.811808  | 25.904805 |
| O  | -1.784543 | 1.332295  | 26.729123 |
| O  | -3.609191 | 1.139919  | 24.377366 |
| Ti | -3.319098 | 2.077503  | 25.949903 |
| O  | -5.170576 | 2.527916  | 26.379394 |
| O  | -2.783735 | 3.635707  | 22.142366 |
| O  | 1.034519  | 0.139140  | 22.156302 |
| O  | 1.204216  | 0.918255  | 26.997387 |
| O  | 0.145638  | 3.855595  | 26.652905 |
| Ti | -0.087865 | 2.020530  | 26.155976 |
| O  | 0.096829  | 1.963817  | 24.308613 |
| O  | 0.017560  | 3.899249  | 22.356536 |
| Ti | 0.011129  | 1.838728  | 22.359610 |
| O  | -1.858617 | 1.071195  | 22.353887 |
| O  | -0.428486 | 6.829771  | 22.212712 |
| O  | -0.232101 | 6.410914  | 26.965161 |
| O  | 3.085855  | 4.467992  | 27.347479 |
| Ti | 1.614241  | 5.306943  | 26.574753 |
| O  | 1.874859  | 5.401107  | 24.770829 |
| O  | 2.788805  | 4.476521  | 22.410521 |
| Ti | 1.277981  | 5.554370  | 22.914501 |
| O  | 5.379316  | 8.573344  | 22.067745 |
| Ti | 6.780306  | 7.310962  | 22.508062 |
| O  | 6.535148  | 7.036500  | 24.421686 |
| O  | 5.175233  | 7.840266  | 27.074354 |

|    |           |           |           |
|----|-----------|-----------|-----------|
| Ti | 6.588664  | 6.894570  | 26.272113 |
| O  | 8.347461  | 5.747012  | 26.843889 |
| O  | 8.514261  | 6.076508  | 21.976111 |
| O  | 6.852471  | 11.021072 | 26.929940 |
| O  | 7.034366  | 12.202467 | 22.107532 |
| O  | 8.411943  | 8.567096  | 22.574582 |
| Ti | 8.307810  | 10.656885 | 22.045211 |
| O  | 8.078872  | 10.505721 | 24.101611 |
| O  | 8.155613  | 8.227581  | 26.297127 |
| Ti | 8.159362  | 10.129422 | 25.882208 |
| O  | 9.850206  | 10.626582 | 26.673842 |
| O  | 10.262441 | 8.479683  | 24.725056 |
| O  | 11.199330 | 9.024911  | 21.995510 |
| O  | 9.950708  | 11.772489 | 22.059539 |
| O  | 11.629997 | 11.245825 | 24.386733 |
| Ti | 11.490114 | 10.958773 | 22.546119 |
| O  | 13.261274 | 10.687852 | 22.043447 |
| Ti | 11.168407 | 9.925869  | 25.592779 |
| O  | 12.780179 | 9.126628  | 26.126174 |
| Ti | 13.545819 | 7.893010  | 24.928897 |
| Ti | 13.400475 | 8.726303  | 22.098515 |
| O  | 14.109396 | 6.393470  | 25.887066 |
| Ti | 12.676514 | 5.113715  | 25.762318 |
| O  | 12.724779 | 4.970902  | 23.921002 |
| O  | 14.015138 | 6.934891  | 21.426288 |
| Ti | 12.674201 | 5.528156  | 22.040970 |
| O  | 12.254966 | 7.446090  | 23.469130 |
| O  | 12.394500 | 3.443651  | 26.565116 |
| O  | 11.298892 | 6.216441  | 26.506685 |
| Ti | 9.655991  | 6.735029  | 25.792278 |
| O  | 14.588880 | 8.738816  | 23.664368 |
| O  | 9.630333  | 5.917227  | 24.145143 |
| O  | 10.973974 | 6.128577  | 21.413833 |
| Ti | 10.030771 | 7.380930  | 22.810452 |
| Ti | 4.570643  | 3.968142  | 22.633651 |
| O  | 4.704288  | 4.104704  | 24.535349 |
| Ti | 4.593677  | 3.851775  | 26.361534 |
| Ti | 2.891225  | 0.263377  | 22.799414 |
| O  | 3.801716  | 2.052278  | 26.244505 |
| O  | 4.405254  | -0.396274 | 27.045939 |
| O  | 2.534612  | -0.209490 | 24.582474 |
| Ti | 2.875185  | 0.423621  | 26.302789 |
| O  | 3.865142  | 1.932975  | 22.592388 |
| Ti | 9.010868  | -0.099846 | 25.589843 |
| O  | 9.323527  | -1.550149 | 24.366122 |
| Ti | 9.045044  | -0.499051 | 22.806632 |
| O  | 8.749826  | 1.013831  | 24.092678 |
| O  | 7.249656  | -0.527980 | 22.245233 |
| O  | 7.473283  | -0.121665 | 26.640950 |
| O  | 6.348712  | 2.557929  | 26.945231 |
| Ti | 5.800058  | 0.761616  | 26.347931 |
| O  | 5.652736  | 0.769734  | 24.499183 |

|    |           |           |           |
|----|-----------|-----------|-----------|
| O  | 6.555380  | 2.576171  | 22.270442 |
| Ti | 5.870083  | 0.694892  | 22.602344 |
| O  | 4.429343  | -0.821655 | 22.397593 |
| O  | 6.071444  | 5.359591  | 22.329411 |
| O  | 5.973460  | 5.125585  | 26.924924 |
| Ti | 11.000110 | 2.283332  | 25.969513 |
| O  | 11.502372 | 2.123946  | 24.179289 |
| O  | 12.581566 | 3.537369  | 21.766969 |
| Ti | 11.132985 | 2.296454  | 22.330822 |
| O  | 10.643655 | 0.326643  | 22.073617 |
| O  | 10.561355 | 0.498190  | 26.471882 |
| O  | 9.423855  | 3.132439  | 26.555133 |
| Ti | 7.703321  | 3.886929  | 26.323294 |
| O  | 7.541899  | 3.931315  | 24.493400 |
| O  | 9.593121  | 3.339360  | 22.191205 |
| Ti | 7.889917  | 4.136264  | 22.625063 |

48c-like 3-D (1,1,4)-mer

|    |           |          |           |
|----|-----------|----------|-----------|
| Ti | -6.803235 | 3.602911 | -1.746169 |
| O  | -6.952306 | 3.528063 | 0.100938  |
| O  | -8.700795 | 2.556260 | 2.424607  |
| Ti | -7.075115 | 3.580260 | 2.000709  |
| O  | -6.505354 | 5.518409 | 2.026110  |
| O  | -6.327392 | 5.449927 | -1.888012 |
| O  | -5.320950 | 2.920190 | -2.642368 |
| Ti | -3.656823 | 2.240196 | -2.051430 |
| O  | -3.752288 | 2.295269 | -0.204030 |
| O  | -5.649354 | 2.465305 | 2.473756  |
| Ti | -3.816011 | 2.059047 | 1.689257  |
| O  | -2.056720 | 0.920301 | 1.949104  |
| O  | -1.903305 | 1.105166 | -2.544259 |
| Ti | -4.848290 | 6.273000 | -1.112456 |
| O  | -5.507699 | 7.703412 | 0.024340  |
| Ti | -5.170800 | 6.829086 | 1.654190  |
| O  | -4.113013 | 5.477214 | 0.486900  |
| O  | -3.395164 | 7.044959 | 2.458875  |
| O  | -3.424098 | 6.400274 | -2.274468 |
| O  | -2.333853 | 3.669933 | -2.461462 |
| Ti | -1.739900 | 5.485086 | -1.977443 |
| O  | -1.499983 | 5.591320 | -0.144173 |
| O  | -2.971537 | 3.789420 | 2.097066  |
| Ti | -2.215688 | 5.589304 | 1.703832  |
| O  | -0.716301 | 7.141606 | 1.799322  |
| O  | -0.082035 | 4.232639 | 1.647462  |
| O  | 0.218913  | 4.210189 | -1.905022 |
| O  | -0.424163 | 6.626059 | -2.825327 |
| O  | 1.396271  | 6.528256 | -0.370142 |
| Ti | 1.123578  | 5.863110 | -2.058808 |
| Ti | 0.725691  | 5.942665 | 1.338828  |
| Ti | -0.356687 | 2.162235 | 1.830738  |
| O  | -0.675411 | 2.062216 | -0.092435 |
| Ti | -0.551479 | 2.394315 | -1.879819 |

|    |            |           |           |
|----|------------|-----------|-----------|
| Ti | -9.491125  | -1.910630 | -0.724112 |
| Ti | -9.352055  | -2.662691 | 2.123734  |
| O  | -10.047158 | -0.428432 | -1.725356 |
| Ti | -8.650834  | 0.883941  | -1.553096 |
| O  | -8.843393  | 1.076255  | 0.277866  |
| O  | -10.058853 | -0.889385 | 2.759935  |
| Ti | -8.770892  | 0.556698  | 2.156652  |
| O  | -8.234728  | -1.395573 | 0.721229  |
| O  | -8.311492  | 2.582338  | -2.300375 |
| O  | -7.246957  | -0.184408 | -2.302725 |
| Ti | -5.597675  | -0.652815 | -1.560522 |
| O  | -10.528901 | -2.753463 | 0.544878  |
| O  | -5.670743  | 0.203507  | 0.060201  |
| O  | -7.054524  | 0.000194  | 2.763592  |
| Ti | -6.008776  | -1.223956 | 1.429167  |
| Ti | -7.037973  | -3.871319 | -1.312481 |
| O  | -8.671031  | -3.144867 | -1.885521 |
| O  | -7.141708  | -2.886692 | 2.248758  |
| O  | -5.811976  | -5.592702 | 2.278751  |
| O  | -7.469861  | -5.178956 | -0.080724 |
| Ti | -7.370881  | -4.841602 | 1.755490  |
| O  | -9.155778  | -4.616676 | 2.228295  |
| O  | -6.169938  | -2.386623 | -0.473344 |
| O  | -2.674649  | -4.821168 | -2.620595 |
| O  | -2.891265  | -5.909612 | 2.259300  |
| O  | -4.333142  | -2.357201 | 1.671023  |
| Ti | -4.212104  | -4.418354 | 2.259524  |
| O  | -3.953214  | -4.319481 | 0.198915  |
| O  | -4.035925  | -2.089890 | -2.036699 |
| Ti | -4.027151  | -3.981419 | -1.589144 |
| O  | -5.695878  | -4.543654 | -2.383912 |
| O  | -4.270213  | 0.366330  | -2.572493 |
| O  | -4.500072  | 0.098546  | 2.252035  |
| O  | -1.271144  | -2.193688 | 2.240802  |
| Ti | -2.759492  | -1.049811 | 1.764519  |
| O  | -2.471493  | -0.816698 | -0.143672 |
| O  | -1.037143  | -1.591686 | -2.775064 |
| Ti | -2.500925  | -0.716000 | -1.991137 |
| O  | 0.980624   | 1.797886  | -2.847286 |
| Ti | 2.491741   | 0.984199  | -2.136121 |
| O  | 2.359553   | 0.919011  | -0.323675 |
| O  | 1.522105   | 2.070908  | 1.871205  |
| Ti | 2.992794   | 0.873177  | 1.539987  |
| O  | 4.630177   | -0.384158 | 2.345837  |
| O  | 4.368065   | -0.062736 | -2.478265 |
| O  | 2.675212   | 6.152235  | 1.962675  |
| O  | 2.771562   | 5.363683  | -2.815519 |
| O  | 3.948247   | 2.440973  | -2.294732 |
| Ti | 4.000739   | 4.287870  | -1.873397 |
| O  | 3.642034   | 4.291865  | -0.047239 |
| O  | 4.228981   | 2.539809  | 2.243775  |
| Ti | 3.677421   | 4.455201  | 1.881029  |

|    |           |           |           |
|----|-----------|-----------|-----------|
| O  | 5.492652  | 5.099033  | 2.191233  |
| O  | 7.007335  | 2.932627  | 2.742151  |
| O  | 6.735148  | 2.554510  | -1.481376 |
| O  | 5.713980  | 5.026931  | -2.319267 |
| O  | 7.378183  | 5.327961  | 0.103692  |
| Ti | 7.242674  | 4.357907  | -1.489221 |
| O  | 9.099358  | 4.033215  | -1.927578 |
| Ti | 7.410754  | 4.662333  | 1.869932  |
| O  | 9.412578  | 4.539273  | 2.632470  |
| Ti | 10.169861 | 2.830111  | 2.031669  |
| Ti | 9.584804  | 2.634019  | -0.780138 |
| O  | 10.109467 | 0.971440  | 2.499759  |
| Ti | 9.090098  | -0.769425 | 2.232952  |
| O  | 9.752820  | -1.125923 | 0.513185  |
| O  | 9.613348  | 0.934021  | -1.531489 |
| Ti | 8.782647  | -0.723015 | -1.037437 |
| O  | 8.481407  | 2.881696  | 0.795264  |
| O  | 8.659190  | -2.602877 | 2.869306  |
| O  | 7.465325  | 0.106198  | 1.975748  |
| Ti | 5.965777  | 1.252915  | 2.179430  |
| O  | 11.095287 | 2.908044  | 0.394269  |
| O  | 4.931747  | 1.179417  | 0.399144  |
| O  | 6.982979  | -0.205603 | -1.085580 |
| Ti | 5.533461  | 1.046836  | -1.353171 |
| Ti | 0.554242  | -2.066876 | -1.879315 |
| O  | 0.477709  | -1.619931 | -0.077797 |
| Ti | 0.605751  | -2.435802 | 1.612254  |
| Ti | -1.058998 | -5.497879 | -1.959207 |
| O  | -0.383231 | -4.385954 | 1.696421  |
| O  | -0.009858 | -7.137478 | 2.014803  |
| O  | -1.572466 | -6.516810 | -0.509248 |
| Ti | -1.366502 | -6.072825 | 1.313914  |
| O  | -0.154027 | -3.909631 | -1.477903 |
| Ti | 4.640923  | -5.744054 | 2.283881  |
| O  | 5.006452  | -6.799143 | 0.699812  |
| Ti | 4.894103  | -5.436951 | -0.546445 |
| O  | 4.406211  | -4.162164 | 0.940714  |
| O  | 3.627413  | -5.689139 | -1.863495 |
| O  | 2.996867  | -6.651530 | 2.642883  |
| O  | 2.213723  | -3.649298 | 2.133263  |
| Ti | 1.404807  | -5.830273 | 2.139065  |
| O  | 1.626783  | -5.423896 | 0.203655  |
| O  | 2.319870  | -3.298628 | -2.145416 |
| Ti | 1.808118  | -5.134409 | -1.596778 |
| O  | 0.559138  | -6.197325 | -2.631624 |
| O  | 1.948662  | -0.884381 | -2.629743 |
| O  | 2.030524  | -0.973102 | 1.969983  |
| Ti | 6.959697  | -3.535078 | 2.532721  |
| O  | 6.913574  | -2.890174 | 0.712095  |
| O  | 8.535920  | -2.411396 | -1.841618 |
| Ti | 6.892284  | -3.111642 | -1.171204 |
| O  | 6.580380  | -4.976284 | -1.223810 |

|    |            |           |           |
|----|------------|-----------|-----------|
| O  | 6.486416   | -5.361783 | 2.637039  |
| O  | 5.376735   | -2.573002 | 3.270728  |
| Ti | 3.799276   | -2.320263 | 1.918538  |
| O  | 3.747979   | -1.798980 | 0.016389  |
| O  | 5.392903   | -2.630105 | -2.211391 |
| Ti | 3.711287   | -1.871233 | -1.819682 |
| Ti | -6.262221  | 5.664210  | 4.279360  |
| O  | -6.854769  | 6.109131  | 5.972175  |
| O  | -7.664396  | 4.429174  | 8.235089  |
| Ti | -6.205202  | 5.693345  | 7.713962  |
| O  | -5.547275  | 7.550553  | 7.999330  |
| O  | -5.578217  | 7.469168  | 3.590105  |
| O  | -4.660060  | 4.724150  | 4.316147  |
| Ti | -2.857933  | 3.982454  | 4.332856  |
| O  | -2.445942  | 3.656710  | 6.125300  |
| O  | -4.734366  | 4.578502  | 7.744826  |
| Ti | -2.901763  | 3.981713  | 7.929236  |
| O  | -1.025458  | 2.680802  | 8.360846  |
| O  | -0.987936  | 2.762328  | 3.819942  |
| Ti | -3.738546  | 7.984495  | 4.408048  |
| O  | -4.379529  | 9.356367  | 5.648460  |
| Ti | -3.953504  | 8.373238  | 7.183372  |
| O  | -3.485979  | 6.897564  | 5.981423  |
| O  | -2.046464  | 8.780494  | 7.656873  |
| O  | -2.077422  | 8.722434  | 3.879938  |
| O  | -1.536527  | 5.355594  | 3.745274  |
| Ti | -0.499611  | 7.662747  | 3.815226  |
| O  | -0.622521  | 7.061563  | 5.638388  |
| O  | -1.972170  | 5.702835  | 8.312423  |
| Ti | -0.867760  | 7.118323  | 7.469235  |
| O  | 0.881149   | 8.347540  | 7.753757  |
| O  | 0.658656   | 5.628156  | 7.623786  |
| O  | 0.898743   | 5.967449  | 3.587442  |
| O  | 1.240571   | 8.604445  | 3.657754  |
| O  | 2.551877   | 6.651574  | 5.593354  |
| Ti | 2.537811   | 7.260000  | 3.789373  |
| Ti | 2.143758   | 6.910563  | 7.393848  |
| Ti | 0.715804   | 3.666790  | 8.014949  |
| O  | 0.554811   | 3.616713  | 6.045574  |
| Ti | 0.434300   | 4.143217  | 4.272421  |
| Ti | -9.501883  | -0.825770 | 4.892655  |
| Ti | -8.458313  | -0.918372 | 7.646177  |
| O  | -9.501942  | 1.006357  | 4.227261  |
| Ti | -8.424280  | 2.650696  | 4.602440  |
| O  | -9.170264  | 3.002194  | 6.279839  |
| O  | -9.231977  | 0.854389  | 8.315192  |
| Ti | -8.178742  | 2.578685  | 7.827924  |
| O  | -7.706171  | -0.920133 | 5.695669  |
| O  | -7.751998  | 4.408702  | 3.903443  |
| O  | -6.758496  | 1.950936  | 4.946879  |
| Ti | -5.356172  | 0.861719  | 4.125211  |
| O  | -10.190468 | -0.953383 | 6.559711  |



|    |           |           |          |
|----|-----------|-----------|----------|
| O  | -4.426813 | 0.661742  | 5.894956 |
| O  | -6.558896 | 1.671749  | 7.866787 |
| Ti | -4.993364 | 0.515659  | 7.627595 |
| Ti | -6.937266 | -2.600654 | 4.509697 |
| O  | -8.960806 | -2.644755 | 4.151684 |
| O  | -6.210933 | -1.113348 | 7.692194 |
| O  | -5.246576 | -3.882240 | 8.610138 |
| O  | -6.835835 | -3.788740 | 5.963977 |
| Ti | -6.584245 | -3.080625 | 7.678930 |
| O  | -8.392665 | -2.747477 | 8.172995 |
| O  | -5.524633 | -1.159556 | 4.456078 |
| O  | -2.802713 | -3.797434 | 3.731981 |
| O  | -2.293190 | -4.199798 | 8.501979 |
| O  | -3.350018 | -0.592094 | 8.416209 |
| Ti | -3.611743 | -2.765002 | 8.619631 |
| O  | -3.679138 | -2.512486 | 6.612583 |
| O  | -2.620554 | -0.982533 | 4.046621 |
| Ti | -3.851461 | -2.348590 | 4.798436 |
| O  | -5.268394 | -3.563147 | 3.869384 |
| O  | -3.545247 | 1.983601  | 3.955206 |
| O  | -3.679539 | 2.002783  | 8.433796 |
| O  | -0.370317 | -0.295218 | 8.738946 |
| Ti | -1.834838 | 0.822504  | 8.092125 |
| O  | -1.516517 | 0.725347  | 6.217178 |
| O  | -0.042119 | 0.507991  | 3.418340 |
| Ti | -1.842249 | 0.831829  | 4.369068 |
| O  | 2.351366  | 3.881764  | 3.524562 |
| Ti | 3.667047  | 2.645084  | 4.455071 |
| O  | 3.017776  | 2.838053  | 6.197207 |
| O  | 2.657866  | 3.865372  | 8.665728 |
| Ti | 4.055526  | 2.500611  | 7.785089 |
| O  | 5.652164  | 1.016884  | 8.473001 |
| O  | 5.552063  | 1.349961  | 4.226531 |
| O  | 3.982618  | 7.200204  | 7.858200 |
| O  | 4.475780  | 7.363423  | 3.732175 |
| O  | 5.122380  | 4.125554  | 4.463909 |
| Ti | 5.663075  | 6.041329  | 4.284692 |
| O  | 5.841014  | 6.095455  | 6.142925 |
| O  | 5.505796  | 4.017963  | 8.354676 |
| Ti | 5.640926  | 6.100345  | 8.100148 |
| O  | 7.692450  | 6.583756  | 7.997976 |
| O  | 8.477651  | 3.957600  | 8.437780 |
| O  | 8.113332  | 4.431686  | 5.443259 |
| O  | 7.516875  | 6.231434  | 3.350545 |
| O  | 9.475041  | 6.784111  | 5.799314 |
| Ti | 9.142250  | 5.712423  | 4.317525 |
| O  | 11.163072 | 5.432612  | 4.259747 |
| Ti | 8.992990  | 5.507725  | 7.177846 |
| O  | 10.688334 | 5.671321  | 8.517310 |
| Ti | 11.709760 | 4.024639  | 8.120391 |
| Ti | 11.629506 | 3.984854  | 5.217806 |
| O  | 11.448772 | 2.112906  | 8.525766 |

|    |           |           |           |
|----|-----------|-----------|-----------|
| Ti | 10.235241 | 0.505832  | 8.076161  |
| O  | 11.009102 | 0.571041  | 6.325717  |
| O  | 11.334582 | 2.589344  | 3.956327  |
| Ti | 10.147471 | 1.018362  | 4.712523  |
| O  | 10.295647 | 3.828051  | 6.601228  |
| O  | 9.707977  | -1.278038 | 8.774708  |
| O  | 8.539984  | 1.199660  | 7.799080  |
| Ti | 7.146428  | 2.462979  | 8.094887  |
| O  | 12.910039 | 4.151826  | 6.646012  |
| O  | 5.903194  | 2.579259  | 6.510326  |
| O  | 8.550693  | 1.905682  | 4.893034  |
| Ti | 6.854100  | 2.887448  | 4.855561  |
| Ti | 1.440620  | -0.465583 | 4.140818  |
| O  | 1.173676  | -0.453611 | 6.023008  |
| Ti | 1.401185  | -0.709497 | 7.847504  |
| Ti | -0.869015 | -3.780218 | 3.833821  |
| O  | 0.331876  | -2.569360 | 8.052071  |
| O  | 0.624642  | -5.330118 | 8.121577  |
| O  | -1.015080 | -4.030878 | 5.715359  |
| Ti | -0.739668 | -4.163114 | 7.546323  |
| O  | 0.595213  | -2.362050 | 3.920760  |
| Ti | 5.404202  | -3.884851 | 8.223010  |
| O  | 5.476860  | -5.107000 | 6.653992  |
| Ti | 5.394357  | -3.912904 | 5.294034  |
| O  | 4.994573  | -2.476211 | 6.536861  |
| O  | 4.013382  | -4.685948 | 4.060076  |
| O  | 3.744651  | -4.715800 | 8.798368  |
| O  | 3.028438  | -2.004231 | 8.265286  |
| Ti | 2.065188  | -4.072728 | 8.306495  |
| O  | 2.249357  | -3.758900 | 6.317508  |
| O  | 3.178087  | -1.912074 | 4.163137  |
| Ti | 2.246095  | -3.737132 | 4.513211  |
| O  | 0.799299  | -5.035756 | 3.944500  |
| O  | 2.932702  | 0.830168  | 3.903395  |
| O  | 2.805038  | 0.781154  | 8.160680  |
| Ti | 8.088030  | -2.544706 | 8.436882  |
| O  | 8.847506  | -2.447332 | 6.663918  |
| O  | 9.723189  | -0.839081 | 4.268275  |
| Ti | 8.243374  | -2.047110 | 4.978364  |
| O  | 7.248998  | -3.779594 | 4.687235  |
| O  | 7.272954  | -4.242315 | 8.510013  |
| O  | 6.372441  | -1.670267 | 8.385591  |
| Ti | 4.622275  | -0.736752 | 7.877793  |
| O  | 4.284225  | 0.126788  | 6.210202  |
| O  | 6.770451  | -0.935341 | 4.893767  |
| Ti | 4.826744  | -0.640884 | 4.524462  |
| Ti | -4.973793 | 7.395408  | 10.100356 |
| O  | -5.794398 | 7.669075  | 11.780649 |
| O  | -6.845763 | 5.909819  | 14.130831 |
| Ti | -5.272529 | 6.999948  | 13.468079 |
| O  | -4.286708 | 8.725711  | 13.692382 |
| O  | -3.935740 | 8.926622  | 9.262643  |

|    |            |           |           |
|----|------------|-----------|-----------|
| O  | -3.521245  | 6.325187  | 10.379849 |
| Ti | -1.603956  | 5.774857  | 10.540725 |
| O  | -1.291753  | 4.388463  | 12.057749 |
| O  | -3.861901  | 5.827412  | 13.518714 |
| Ti | -1.909561  | 5.402835  | 13.692555 |
| O  | -0.336632  | 3.914112  | 14.304646 |
| O  | 0.203737   | 4.636402  | 9.981066  |
| Ti | -1.934682  | 9.254284  | 9.680925  |
| O  | -2.661110  | 9.841146  | 11.360292 |
| Ti | -2.441608  | 8.913571  | 12.925517 |
| O  | -1.927556  | 7.104270  | 12.355039 |
| O  | -0.635346  | 9.587756  | 13.464509 |
| O  | -0.312606  | 10.191059 | 9.690559  |
| O  | -0.851247  | 7.534736  | 9.791462  |
| Ti | 1.048768   | 8.795136  | 9.787285  |
| O  | 0.974876   | 8.082929  | 11.627625 |
| O  | -0.145052  | 6.521144  | 14.080257 |
| Ti | 0.817547   | 8.216732  | 13.433488 |
| O  | 2.424831   | 9.500957  | 13.776927 |
| O  | 2.407786   | 6.803438  | 14.022318 |
| O  | 2.050758   | 6.794692  | 9.696693  |
| O  | 2.874621   | 9.397191  | 9.797559  |
| O  | 4.242512   | 7.727029  | 11.925418 |
| Ti | 3.963298   | 7.852418  | 10.018501 |
| Ti | 3.859671   | 8.153744  | 13.707864 |
| Ti | 1.483378   | 4.908334  | 13.984146 |
| O  | 1.622421   | 4.478633  | 12.181138 |
| Ti | 2.352537   | 4.949739  | 10.429895 |
| Ti | -8.818759  | 0.942747  | 10.300910 |
| Ti | -8.724968  | 0.879077  | 13.130382 |
| O  | -8.520143  | 2.794658  | 9.950691  |
| Ti | -7.153445  | 4.302218  | 10.334928 |
| O  | -8.076882  | 4.486225  | 12.005276 |
| O  | -8.580615  | 2.435280  | 14.239791 |
| Ti | -7.321695  | 4.064708  | 13.645346 |
| O  | -7.361760  | 0.926262  | 11.757917 |
| O  | -6.507082  | 6.060758  | 9.814998  |
| O  | -5.526893  | 3.418920  | 10.579520 |
| Ti | -3.914866  | 2.396404  | 10.578712 |
| O  | -10.038599 | 0.796100  | 11.739383 |
| O  | -2.956541  | 2.130449  | 12.324046 |
| O  | -5.755296  | 3.123183  | 13.401240 |
| Ti | -4.295154  | 1.991356  | 13.927823 |
| Ti | -6.234362  | -0.834505 | 10.929454 |
| O  | -7.817642  | -0.707327 | 9.745045  |
| O  | -5.297209  | 0.355445  | 13.727775 |
| O  | -5.265569  | -2.221533 | 14.875380 |
| O  | -6.746351  | -1.774734 | 12.453571 |
| Ti | -6.540437  | -1.051486 | 14.237758 |
| O  | -8.518680  | -0.562131 | 14.188367 |
| O  | -4.891699  | 0.651286  | 10.558427 |
| O  | -1.997585  | -2.144088 | 9.973881  |

|    |           |           |           |
|----|-----------|-----------|-----------|
| O  | -2.096718 | -2.488937 | 14.389150 |
| O  | -2.574116 | 0.610291  | 14.404472 |
| Ti | -3.559057 | -1.350841 | 14.412409 |
| O  | -3.347495 | -0.989657 | 12.483711 |
| O  | -1.981141 | 1.038815  | 10.364400 |
| Ti | -3.115971 | -0.631426 | 10.720071 |
| O  | -4.772244 | -1.881043 | 10.163587 |
| O  | -2.539532 | 3.811610  | 10.063064 |
| O  | -2.935818 | 3.573028  | 14.279830 |
| O  | -0.001399 | 0.916823  | 15.047462 |
| Ti | -1.318894 | 2.149933  | 13.838465 |
| O  | 0.040885  | 1.856821  | 12.447679 |
| O  | 1.017480  | 2.236446  | 9.738734  |
| Ti | -0.705562 | 2.770984  | 10.763879 |
| O  | 4.285492  | 5.671510  | 9.843789  |
| Ti | 5.414849  | 4.043718  | 10.603350 |
| O  | 4.034857  | 4.555267  | 11.987551 |
| O  | 3.425087  | 4.681330  | 14.885834 |
| Ti | 4.992992  | 3.886936  | 13.589221 |
| O  | 6.717080  | 2.518921  | 14.216270 |
| O  | 7.057033  | 2.582852  | 10.144300 |
| O  | 5.630564  | 9.024708  | 14.110561 |
| O  | 5.833056  | 8.121809  | 9.347407  |
| O  | 6.800549  | 5.531920  | 9.967982  |
| Ti | 7.513178  | 7.506140  | 10.014229 |
| O  | 7.201635  | 7.574378  | 11.871407 |
| O  | 6.480435  | 5.390134  | 13.900916 |
| Ti | 6.779114  | 7.412469  | 13.734519 |
| O  | 8.766605  | 8.144994  | 13.786639 |
| O  | 9.398684  | 5.512428  | 14.095852 |
| O  | 9.339815  | 6.005846  | 11.035231 |
| O  | 9.185900  | 8.319223  | 9.395651  |
| O  | 10.937458 | 8.155819  | 11.620825 |
| Ti | 10.568373 | 7.238929  | 9.982337  |
| O  | 12.550385 | 6.708936  | 9.933826  |
| Ti | 10.157390 | 7.050300  | 12.947638 |
| O  | 11.829393 | 7.216834  | 14.288388 |
| Ti | 12.771434 | 5.566531  | 13.953059 |
| Ti | 12.852234 | 5.354132  | 11.086221 |
| O  | 12.378112 | 3.682143  | 14.334199 |
| Ti | 11.295167 | 1.977610  | 13.912840 |
| O  | 12.281319 | 1.730382  | 12.281338 |
| O  | 12.715368 | 3.773643  | 9.989112  |
| Ti | 11.472027 | 2.164255  | 10.659243 |
| O  | 11.422234 | 5.332899  | 12.374190 |
| O  | 10.507172 | 0.276821  | 14.510370 |
| O  | 9.658509  | 2.761638  | 13.480496 |
| Ti | 8.160777  | 3.912348  | 13.737294 |
| O  | 14.062335 | 5.598413  | 12.543485 |
| O  | 7.111613  | 4.128952  | 12.023645 |
| O  | 9.969942  | 3.228391  | 10.853534 |
| Ti | 8.430650  | 4.279778  | 10.474394 |

|    |           |           |           |
|----|-----------|-----------|-----------|
| Ti | 2.518640  | 1.138054  | 10.330199 |
| O  | 2.550878  | 1.069276  | 12.167813 |
| Ti | 1.767503  | 1.310575  | 13.910480 |
| Ti | -0.051973 | -1.936378 | 10.263380 |
| O  | 1.486496  | -0.746286 | 14.136619 |
| O  | 1.089409  | -3.436791 | 14.317900 |
| O  | -0.281669 | -1.780302 | 12.125254 |
| Ti | -0.208465 | -2.113701 | 14.018729 |
| O  | 1.602208  | -0.691630 | 10.163263 |
| Ti | 5.780026  | -2.563405 | 14.634524 |
| O  | 6.478593  | -3.008039 | 12.876232 |
| Ti | 6.405566  | -2.097514 | 11.289224 |
| O  | 5.671851  | -0.434166 | 12.185717 |
| O  | 5.037199  | -2.950250 | 10.182021 |
| O  | 4.288764  | -3.685926 | 14.720638 |
| O  | 4.507826  | -0.916757 | 14.462766 |
| Ti | 2.788316  | -2.502537 | 14.336706 |
| O  | 3.149743  | -2.283381 | 12.403598 |
| O  | 4.230601  | -0.373962 | 10.078735 |
| Ti | 3.156617  | -2.150767 | 10.600685 |
| O  | 1.516865  | -3.298061 | 10.183812 |
| O  | 4.142331  | 2.416779  | 10.015404 |
| O  | 3.778621  | 2.124464  | 14.040425 |
| Ti | 8.834903  | -0.892685 | 14.363266 |
| O  | 9.509826  | -1.247772 | 12.593214 |
| O  | 10.675806 | 0.423429  | 10.266908 |
| Ti | 9.217794  | -0.833620 | 10.803638 |
| O  | 8.203054  | -2.588157 | 10.515632 |
| O  | 7.686157  | -2.323439 | 15.196368 |
| O  | 7.314051  | 0.167797  | 14.316476 |
| Ti | 5.464376  | 0.828456  | 13.784263 |
| O  | 5.394044  | 2.262963  | 12.146762 |
| O  | 7.528403  | -0.013310 | 10.666450 |
| Ti | 5.747440  | 0.973321  | 10.638991 |
| Ti | -3.784816 | 8.614374  | 15.741137 |
| O  | -4.453379 | 8.975479  | 17.513438 |
| O  | -5.626121 | 7.297675  | 19.839240 |
| Ti | -4.166637 | 8.550723  | 19.302423 |
| O  | -3.142672 | 10.302169 | 19.599091 |
| O  | -2.633311 | 10.040595 | 14.900398 |
| O  | -2.265109 | 7.554274  | 15.792849 |
| Ti | -0.414916 | 6.892016  | 16.321365 |
| O  | -0.343285 | 5.462645  | 17.958531 |
| O  | -2.480258 | 7.731146  | 19.437075 |
| Ti | -0.698249 | 6.752092  | 19.466926 |
| O  | 0.903720  | 5.307452  | 20.095934 |
| O  | 1.270662  | 5.596807  | 16.064840 |
| Ti | -0.724499 | 10.289473 | 15.452385 |
| O  | -1.435082 | 10.748363 | 17.205266 |
| Ti | -1.362855 | 9.830852  | 18.785134 |
| O  | -0.622090 | 8.161313  | 17.918363 |
| O  | -0.003456 | 10.648250 | 19.919544 |

|    |           |           |           |
|----|-----------|-----------|-----------|
| O  | 0.767948  | 11.408640 | 15.376198 |
| O  | 0.536785  | 8.640390  | 15.639028 |
| Ti | 2.263772  | 10.221048 | 15.770677 |
| O  | 1.893779  | 10.006674 | 17.703137 |
| O  | 0.821526  | 8.089853  | 20.037963 |
| Ti | 1.886763  | 9.865917  | 19.506723 |
| O  | 3.529696  | 11.012032 | 19.920889 |
| O  | 3.445415  | 8.412160  | 19.943715 |
| O  | 3.561825  | 8.464606  | 15.968713 |
| O  | 3.961586  | 11.155520 | 15.789989 |
| O  | 5.331871  | 9.495251  | 17.978371 |
| Ti | 5.259859  | 9.831405  | 16.084916 |
| Ti | 5.101549  | 9.655472  | 19.839118 |
| Ti | 2.531227  | 6.578449  | 19.775773 |
| O  | 2.495143  | 6.654124  | 17.937663 |
| Ti | 3.283045  | 6.407132  | 16.197480 |
| Ti | -7.719491 | 2.153025  | 16.154609 |
| Ti | -7.801717 | 2.365751  | 19.020704 |
| O  | -7.327904 | 4.037933  | 15.773004 |
| Ti | -6.244569 | 5.742913  | 16.194380 |
| O  | -7.231658 | 5.991205  | 17.825184 |
| O  | -7.664297 | 3.945876  | 20.117746 |
| Ti | -6.422076 | 5.556083  | 19.447011 |
| O  | -6.371707 | 2.387937  | 17.732440 |
| O  | -5.456089 | 7.444180  | 15.597868 |
| O  | -4.607838 | 4.958913  | 16.625732 |
| Ti | -3.110761 | 3.807856  | 16.366578 |
| O  | -9.011694 | 2.121709  | 17.563320 |
| O  | -2.057103 | 3.593996  | 18.079134 |
| O  | -4.919300 | 4.494887  | 19.248814 |
| Ti | -3.378326 | 3.443624  | 19.627686 |
| Ti | -5.104967 | 0.670589  | 17.161671 |
| O  | -6.777125 | 0.502828  | 15.819679 |
| O  | -4.290676 | 1.718202  | 19.070921 |
| O  | -4.133488 | -0.594830 | 20.712852 |
| O  | -5.884347 | -0.435227 | 18.487573 |
| Ti | -5.516359 | 0.484280  | 20.125659 |
| O  | -7.499005 | 1.010607  | 20.172048 |
| O  | -4.348635 | 2.208234  | 16.010455 |
| O  | -0.581690 | -1.305665 | 15.995087 |
| O  | -0.782070 | -0.403785 | 20.756070 |
| O  | -1.749891 | 2.190801  | 20.137684 |
| Ti | -2.459472 | 0.216190  | 20.093116 |
| O  | -2.152845 | 0.150469  | 18.234405 |
| O  | -1.430843 | 2.331048  | 16.202045 |
| Ti | -1.728341 | 0.307486  | 16.371088 |
| O  | -3.716121 | -0.424443 | 16.319699 |
| O  | -1.667928 | 5.203207  | 15.888482 |
| O  | -2.006241 | 5.138090  | 19.959876 |
| O  | 0.763683  | 2.047004  | 20.259180 |
| Ti | -0.362627 | 3.679678  | 19.503524 |
| O  | 1.016484  | 3.169549  | 18.118179 |

|    |           |           |           |
|----|-----------|-----------|-----------|
| O  | 1.623548  | 3.037783  | 15.221601 |
| Ti | 0.055528  | 3.834387  | 16.517542 |
| O  | 5.051274  | 6.802522  | 15.058450 |
| Ti | 6.369029  | 5.569622  | 16.266848 |
| O  | 5.006670  | 5.863054  | 17.656076 |
| O  | 4.035451  | 5.484412  | 20.364770 |
| Ti | 5.756169  | 4.947544  | 19.341265 |
| O  | 7.591079  | 3.905778  | 20.042916 |
| O  | 7.985979  | 4.147391  | 15.824175 |
| O  | 7.046931  | 9.865033  | 20.131231 |
| O  | 7.147903  | 10.207620 | 15.715928 |
| O  | 7.624374  | 7.109236  | 15.701360 |
| Ti | 8.611658  | 9.070397  | 15.694508 |
| O  | 8.397091  | 8.710406  | 17.623181 |
| O  | 7.031239  | 6.680570  | 19.741057 |
| Ti | 8.165659  | 8.351048  | 19.386919 |
| O  | 9.821784  | 9.599481  | 19.945286 |
| O  | 9.940859  | 7.067214  | 19.544290 |
| O  | 10.346509 | 7.364994  | 16.377844 |
| O  | 10.318363 | 9.942380  | 15.233082 |
| O  | 11.796389 | 9.494490  | 17.655433 |
| Ti | 11.591459 | 8.771292  | 15.871329 |
| O  | 13.569820 | 8.282123  | 15.920278 |
| Ti | 11.283298 | 8.553561  | 19.178231 |
| O  | 12.865920 | 8.426285  | 20.363521 |
| Ti | 13.868546 | 6.777838  | 19.807831 |
| Ti | 13.777097 | 6.839801  | 16.978113 |
| O  | 13.566275 | 4.926611  | 20.157122 |
| Ti | 12.202720 | 3.416269  | 19.772855 |
| O  | 13.125460 | 3.234273  | 18.102781 |
| O  | 13.633156 | 5.283802  | 15.867486 |
| Ti | 12.372777 | 3.655237  | 16.462527 |
| O  | 12.412148 | 6.793521  | 18.349001 |
| O  | 11.556796 | 1.657275  | 20.293521 |
| O  | 10.576400 | 4.298869  | 19.527024 |
| Ti | 8.964431  | 5.321959  | 19.528273 |
| O  | 15.089180 | 6.924133  | 18.370075 |
| O  | 8.004533  | 5.587373  | 17.782223 |
| O  | 10.806819 | 4.598585  | 16.705730 |
| Ti | 9.344534  | 5.727645  | 16.179636 |
| Ti | 3.566184  | 2.809676  | 16.122755 |
| O  | 3.428150  | 3.239819  | 17.925684 |
| Ti | 2.697647  | 2.768066  | 19.677353 |
| Ti | 1.189769  | -0.437028 | 16.397081 |
| O  | 2.999089  | 0.920610  | 20.405991 |
| O  | 2.174636  | -1.679648 | 20.303369 |
| O  | 0.806431  | -0.005244 | 18.177593 |
| Ti | 1.087222  | -0.133581 | 20.084521 |
| O  | 2.641977  | 0.914099  | 16.081717 |
| Ti | 6.987836  | -1.532064 | 20.426913 |
| O  | 7.710519  | -2.116899 | 18.743965 |
| Ti | 7.490387  | -1.191155 | 17.177165 |

|    |           |           |           |
|----|-----------|-----------|-----------|
| O  | 6.978233  | 0.616606  | 17.751608 |
| O  | 5.688824  | -1.865145 | 16.628942 |
| O  | 5.366288  | -2.471960 | 20.416482 |
| O  | 5.897446  | 0.184030  | 20.316203 |
| Ti | 4.001732  | -1.080028 | 20.315670 |
| O  | 4.077965  | -0.368262 | 18.475333 |
| O  | 5.193742  | 1.199324  | 16.026744 |
| Ti | 4.232686  | -0.499073 | 16.669486 |
| O  | 2.624990  | -1.783923 | 16.329706 |
| O  | 5.385937  | 3.806179  | 15.801007 |
| O  | 4.846301  | 3.082007  | 20.125233 |
| Ti | 10.023182 | 0.325032  | 20.009884 |
| O  | 10.840670 | 0.053115  | 18.326929 |
| O  | 11.894677 | 1.811126  | 15.977795 |
| Ti | 10.320819 | 0.720175  | 16.638547 |
| O  | 9.335250  | -1.006390 | 16.412266 |
| O  | 8.987404  | -1.205741 | 20.849540 |
| O  | 8.569098  | 1.393036  | 19.733281 |
| Ti | 6.652381  | 1.944161  | 19.567038 |
| O  | 6.342377  | 3.331784  | 18.047881 |
| O  | 8.911067  | 1.893145  | 16.588078 |
| Ti | 6.959126  | 2.316695  | 16.412588 |
| Ti | -3.035712 | 10.257885 | 21.679509 |
| O  | -3.807315 | 10.171851 | 23.447744 |
| O  | -4.676134 | 8.564660  | 25.842739 |
| Ti | -3.198913 | 9.774521  | 25.132913 |
| O  | -2.204317 | 11.506073 | 25.427483 |
| O  | -2.213873 | 11.950708 | 21.607850 |
| O  | -1.310200 | 9.395620  | 21.768295 |
| Ti | 0.435351  | 8.436236  | 22.244109 |
| O  | 0.759834  | 7.504519  | 23.887083 |
| O  | -1.722578 | 8.664713  | 25.206733 |
| Ti | 0.227907  | 8.368533  | 25.547639 |
| O  | 2.122139  | 6.896586  | 26.193592 |
| O  | 2.256474  | 6.936443  | 21.946050 |
| Ti | -0.350349 | 11.561461 | 21.896511 |
| O  | -0.411589 | 12.780394 | 23.459949 |
| Ti | -0.339898 | 11.607770 | 24.838702 |
| O  | 0.075837  | 10.137752 | 23.631702 |
| O  | 1.042425  | 12.413216 | 26.054053 |
| O  | 1.296807  | 12.403478 | 21.301961 |
| O  | 2.011632  | 9.718678  | 21.853139 |
| Ti | 2.985554  | 11.787169 | 21.798727 |
| O  | 2.804661  | 11.484940 | 23.787774 |
| O  | 1.871278  | 9.636229  | 25.930843 |
| Ti | 2.806481  | 11.464401 | 25.592843 |
| O  | 4.252457  | 12.764168 | 26.162197 |
| O  | 4.456678  | 10.089724 | 26.184982 |
| O  | 4.717796  | 10.291304 | 22.052982 |
| O  | 4.421509  | 13.050564 | 21.976704 |
| O  | 6.062237  | 11.762891 | 24.389489 |
| Ti | 5.788714  | 11.888110 | 22.558514 |



|    |           |           |           |
|----|-----------|-----------|-----------|
| Ti | 5.920125  | 11.508675 | 26.271745 |
| Ti | 3.614038  | 8.191972  | 25.966707 |
| O  | 3.868296  | 8.182365  | 24.081441 |
| Ti | 3.654271  | 8.431504  | 22.255775 |
| Ti | -6.660988 | 3.696812  | 21.988188 |
| Ti | -6.580666 | 3.741679  | 24.889766 |
| O  | -6.401025 | 5.608390  | 21.580084 |
| Ti | -5.185232 | 7.211973  | 22.031230 |
| O  | -5.960376 | 7.150497  | 23.781575 |
| O  | -6.287280 | 5.136120  | 26.153187 |
| Ti | -5.101026 | 6.708375  | 25.398331 |
| O  | -5.246415 | 3.894749  | 23.506000 |
| O  | -4.653057 | 8.995014  | 21.332394 |
| O  | -3.491195 | 6.517209  | 22.308054 |
| Ti | -2.096752 | 5.253923  | 22.009781 |
| O  | -7.861891 | 3.573532  | 23.461415 |
| O  | -0.857028 | 5.134368  | 23.596150 |
| O  | -3.505759 | 5.818923  | 25.218228 |
| Ti | -1.809457 | 4.836143  | 25.252319 |
| Ti | -3.943218 | 2.214140  | 22.928350 |
| O  | -5.640617 | 2.050170  | 21.591370 |
| O  | -3.064265 | 3.292879  | 24.660695 |
| O  | -2.469227 | 1.498260  | 26.756093 |
| O  | -4.425505 | 0.940089  | 24.308537 |
| Ti | -4.094905 | 2.014110  | 25.789788 |
| O  | -6.116089 | 2.292607  | 25.847764 |
| O  | -3.430096 | 3.762483  | 21.664228 |
| O  | 1.063785  | 0.516486  | 22.245794 |
| O  | 0.568634  | 0.358502  | 26.373436 |
| O  | -0.072777 | 3.599432  | 25.644970 |
| Ti | -0.615493 | 1.684634  | 25.822256 |
| O  | -0.790745 | 1.626236  | 23.964583 |
| O  | -0.451534 | 3.703612  | 21.751726 |
| Ti | -0.589000 | 1.623949  | 22.006731 |
| O  | -2.638924 | 1.140743  | 22.109896 |
| O  | -0.611333 | 6.705484  | 21.631563 |
| O  | -0.508105 | 6.379097  | 25.871577 |
| O  | 2.697796  | 3.851260  | 26.578408 |
| Ti | 1.376674  | 5.087294  | 25.638456 |
| O  | 2.042243  | 4.851221  | 23.904795 |
| O  | 2.391848  | 3.858526  | 21.432714 |
| Ti | 0.994988  | 5.226571  | 22.330737 |
| O  | 5.423835  | 8.017119  | 21.364069 |
| Ti | 6.884660  | 6.894547  | 22.013290 |
| O  | 6.563464  | 6.994284  | 23.887358 |
| O  | 5.095770  | 7.216211  | 26.683995 |
| Ti | 6.895279  | 6.886199  | 25.735191 |
| O  | 8.595253  | 5.734836  | 26.153058 |
| O  | 8.729297  | 5.717256  | 21.673527 |
| O  | 7.853123  | 11.519792 | 26.370152 |
| O  | 7.342083  | 11.920930 | 21.603722 |
| O  | 8.400057  | 8.309295  | 21.691277 |

|    |           |           |           |
|----|-----------|-----------|-----------|
| Ti | 8.659049  | 10.483490 | 21.487349 |
| O  | 8.725709  | 10.231980 | 23.493493 |
| O  | 7.670711  | 8.702851  | 26.059418 |
| Ti | 8.900906  | 10.067351 | 25.307495 |
| O  | 10.317803 | 11.283640 | 26.236549 |
| O  | 10.574507 | 8.879466  | 25.649646 |
| O  | 11.259846 | 8.831543  | 22.417044 |
| O  | 10.293096 | 11.600664 | 21.497384 |
| O  | 11.883679 | 11.508845 | 24.142093 |
| Ti | 11.632048 | 10.799631 | 22.428034 |
| O  | 13.439923 | 10.467228 | 21.932668 |
| Ti | 11.986566 | 10.321718 | 25.597475 |
| O  | 14.010462 | 10.369531 | 25.955018 |
| Ti | 14.553332 | 8.550529  | 25.215200 |
| Ti | 13.507449 | 8.639095  | 22.462335 |
| O  | 14.555648 | 6.719448  | 25.881406 |
| Ti | 13.476182 | 5.075036  | 25.507283 |
| O  | 14.219046 | 4.719787  | 23.828981 |
| O  | 14.281358 | 6.865710  | 21.793751 |
| Ti | 13.227062 | 5.142285  | 22.280598 |
| O  | 12.757102 | 8.642237  | 24.412772 |
| O  | 12.802418 | 3.319183  | 26.205473 |
| O  | 11.810211 | 5.775496  | 25.162457 |
| Ti | 10.405526 | 6.858648  | 25.985619 |
| O  | 15.240204 | 8.676434  | 23.547004 |
| O  | 9.471589  | 7.057924  | 24.217265 |
| O  | 11.606418 | 6.046439  | 22.244802 |
| Ti | 10.041246 | 7.203412  | 22.485051 |
| Ti | 4.330842  | 4.052490  | 22.092523 |
| O  | 4.504367  | 4.104562  | 24.059797 |
| Ti | 4.610192  | 3.579762  | 25.833701 |
| Ti | 2.901720  | 0.804828  | 22.711755 |
| O  | 4.145479  | 1.754651  | 26.514993 |
| O  | 3.805518  | -0.881413 | 26.463928 |
| O  | 2.495122  | 1.060880  | 24.512331 |
| Ti | 2.505818  | 0.459870  | 26.318640 |
| O  | 4.383860  | 2.090045  | 22.483177 |
| Ti | 8.787133  | -0.256987 | 25.707286 |
| O  | 9.427635  | -1.628584 | 24.468021 |
| Ti | 9.002037  | -0.646403 | 22.931365 |
| O  | 8.532302  | 0.828491  | 24.133833 |
| O  | 7.097322  | -1.057753 | 22.452264 |
| O  | 7.124676  | -0.997059 | 26.234231 |
| O  | 6.581017  | 2.366217  | 26.369852 |
| Ti | 5.545978  | 0.059268  | 26.293452 |
| O  | 5.666779  | 0.652608  | 24.468755 |
| O  | 7.017749  | 2.015741  | 21.797902 |
| Ti | 5.911646  | 0.599611  | 22.636833 |
| O  | 4.165587  | -0.630950 | 22.350374 |
| O  | 6.075150  | 5.036916  | 21.743277 |
| O  | 6.035985  | 4.957529  | 26.287907 |
| Ti | 11.312561 | 2.061778  | 25.833202 |

|    |           |           |           |
|----|-----------|-----------|-----------|
| O  | 11.901955 | 1.617894  | 24.138437 |
| O  | 12.714422 | 3.290803  | 21.873226 |
| Ti | 11.255082 | 2.028035  | 22.394884 |
| O  | 10.596693 | 0.170905  | 22.113863 |
| O  | 10.629220 | 0.257179  | 26.521963 |
| O  | 9.707430  | 2.997140  | 25.799772 |
| Ti | 7.903891  | 3.735592  | 25.778221 |
| O  | 7.499890  | 4.064409  | 23.984134 |
| O  | 9.782050  | 3.139568  | 22.359366 |
| Ti | 7.949251  | 3.736356  | 22.178819 |
| Ti | -1.916764 | 11.265308 | 27.581420 |
| O  | -1.867922 | 10.616367 | 29.399640 |
| O  | -3.484912 | 10.137284 | 31.955006 |
| Ti | -1.843039 | 10.837431 | 31.283387 |
| O  | -1.529969 | 12.701683 | 31.334482 |
| O  | -1.437350 | 13.090115 | 27.476201 |
| O  | -0.328245 | 10.307318 | 26.842846 |
| Ti | 1.251311  | 10.045555 | 28.184551 |
| O  | 1.300668  | 9.523478  | 30.085759 |
| O  | -0.340324 | 10.356645 | 32.318802 |
| Ti | 1.339851  | 9.596566  | 31.922837 |
| O  | 3.102001  | 8.610879  | 32.733033 |
| O  | 3.019997  | 8.700695  | 28.129850 |
| Ti | 0.409760  | 13.470804 | 27.826999 |
| O  | 0.044484  | 14.525681 | 29.411499 |
| Ti | 0.156832  | 13.161842 | 30.655807 |
| O  | 0.645751  | 11.888856 | 29.169276 |
| O  | 1.424616  | 13.415670 | 31.972545 |
| O  | 2.053512  | 14.381295 | 27.468125 |
| O  | 2.836322  | 11.374997 | 27.970664 |
| Ti | 3.645436  | 13.558606 | 27.967600 |
| O  | 3.425134  | 13.150726 | 29.902593 |
| O  | 2.730245  | 11.024802 | 32.249753 |
| Ti | 3.242905  | 12.860943 | 31.703292 |
| O  | 4.491940  | 13.924820 | 32.737416 |
| O  | 5.204401  | 11.636853 | 31.583604 |
| O  | 5.433727  | 12.111365 | 28.409754 |
| O  | 5.061843  | 14.864378 | 28.090970 |
| O  | 6.623888  | 14.242576 | 30.614658 |
| Ti | 6.417932  | 13.799653 | 28.791670 |
| Ti | 6.109644  | 13.225057 | 32.065431 |
| Ti | 4.496550  | 9.794143  | 31.984986 |
| O  | 4.572041  | 9.347678  | 30.182180 |
| Ti | 4.445803  | 10.164050 | 28.493125 |
| Ti | -5.122622 | 4.895873  | 28.077428 |
| Ti | -4.531309 | 5.091171  | 30.889785 |
| O  | -5.066241 | 6.756357  | 27.611328 |
| Ti | -4.043777 | 8.495596  | 27.878654 |
| O  | -4.704609 | 8.852406  | 29.598754 |
| O  | -4.559200 | 6.791325  | 31.641131 |
| Ti | -3.732085 | 8.450760  | 31.148833 |
| O  | -3.432296 | 4.843044  | 29.310940 |

|    |           |           |           |
|----|-----------|-----------|-----------|
| O  | -3.614403 | 10.329259 | 27.241858 |
| O  | -2.418489 | 7.622391  | 28.131922 |
| Ti | -0.915842 | 6.482686  | 27.914769 |
| O  | -6.043737 | 4.816076  | 29.716943 |
| O  | 0.118494  | 6.560190  | 29.696872 |
| O  | -1.931923 | 7.935688  | 31.191389 |
| Ti | -0.482141 | 6.681521  | 31.450842 |
| Ti | -2.362124 | 3.067532  | 28.237531 |
| O  | -4.364897 | 3.188396  | 27.473425 |
| O  | -1.681122 | 5.172540  | 31.577898 |
| O  | -0.655048 | 2.700770  | 32.417706 |
| O  | -2.330973 | 2.395373  | 30.002172 |
| Ti | -2.187578 | 3.367903  | 31.593404 |
| O  | -4.043258 | 3.693605  | 32.038081 |
| O  | -1.959087 | 4.797977  | 27.363979 |
| O  | 2.364481  | 1.574703  | 28.138573 |
| O  | 2.285687  | 2.364239  | 32.915247 |
| O  | 1.103812  | 5.286545  | 32.389287 |
| Ti | 1.057260  | 3.439306  | 31.971002 |
| O  | 1.416372  | 3.439035  | 30.145117 |
| O  | 0.818615  | 5.192834  | 27.853260 |
| Ti | 1.371095  | 3.277946  | 28.216475 |
| O  | -0.446049 | 2.630698  | 27.916633 |
| O  | 0.421180  | 8.114840  | 27.735306 |
| O  | 0.682840  | 7.788234  | 32.579718 |
| O  | 4.070206  | 5.930622  | 32.947492 |
| Ti | 2.560199  | 6.743700  | 32.233200 |
| O  | 2.689529  | 6.813399  | 30.421210 |
| O  | 3.527719  | 5.657518  | 28.234718 |
| Ti | 2.054731  | 6.855617  | 28.556582 |
| O  | 6.321868  | 9.918060  | 27.863838 |
| Ti | 7.807900  | 8.771259  | 28.341754 |
| O  | 7.520052  | 8.541127  | 30.250293 |
| O  | 6.087847  | 9.320109  | 32.881058 |
| Ti | 7.550839  | 8.443029  | 32.097793 |
| O  | 9.321249  | 7.361025  | 32.680945 |
| O  | 9.549327  | 7.622057  | 27.857273 |
| O  | 7.724499  | 12.547984 | 32.727135 |
| O  | 7.940712  | 13.632403 | 27.843548 |
| O  | 9.381693  | 10.078550 | 28.435288 |
| Ti | 9.260799  | 12.139605 | 27.845021 |
| O  | 9.000527  | 12.044567 | 29.905653 |
| O  | 9.086423  | 9.816497  | 32.143163 |
| Ti | 9.076294  | 11.707873 | 31.694441 |
| O  | 10.744354 | 12.272758 | 32.488131 |
| O  | 11.218947 | 10.113764 | 30.580799 |
| O  | 12.190305 | 10.610096 | 27.858044 |
| O  | 10.860031 | 13.315347 | 27.825249 |
| O  | 12.518813 | 12.905247 | 30.185667 |
| Ti | 12.418671 | 12.565751 | 28.349874 |
| O  | 14.203492 | 12.342907 | 27.876134 |
| Ti | 12.087692 | 11.598208 | 31.419128 |

|    |           |           |           |
|----|-----------|-----------|-----------|
| O  | 13.719126 | 10.871266 | 31.993019 |
| Ti | 14.540586 | 9.639425  | 30.832187 |
| Ti | 14.400934 | 10.389653 | 27.983383 |
| O  | 15.100173 | 8.158151  | 31.833732 |
| Ti | 13.704835 | 6.845168  | 31.663693 |
| O  | 13.895271 | 6.652788  | 29.831568 |
| O  | 15.108969 | 8.616849  | 27.348736 |
| Ti | 13.822261 | 7.170395  | 27.952395 |
| O  | 13.284795 | 9.122955  | 29.387427 |
| O  | 13.369681 | 5.147194  | 32.413375 |
| O  | 12.298550 | 7.911044  | 32.412500 |
| Ti | 10.649614 | 8.379693  | 31.670518 |
| O  | 15.577339 | 10.483056 | 29.562829 |
| O  | 10.723732 | 7.522910  | 30.049303 |
| O  | 12.104925 | 7.723734  | 27.345311 |
| Ti | 11.057736 | 8.946950  | 28.679240 |
| Ti | 5.405223  | 5.560755  | 28.275372 |
| O  | 5.728920  | 5.660210  | 30.197668 |
| Ti | 5.604762  | 5.332765  | 31.986191 |
| Ti | 4.315415  | 1.783663  | 28.761334 |
| O  | 4.836759  | 3.517338  | 32.013769 |
| O  | 5.479981  | 1.103106  | 32.940088 |
| O  | 3.663421  | 1.196447  | 30.474861 |
| Ti | 3.935274  | 1.864025  | 32.164165 |
| O  | 5.126439  | 3.491225  | 28.467594 |
| Ti | 9.907804  | 1.460650  | 31.227380 |
| O  | 10.567670 | 0.030619  | 30.089868 |
| Ti | 10.225605 | 0.900791  | 28.459089 |
| O  | 9.172553  | 2.253166  | 29.624342 |
| O  | 8.448708  | 0.677190  | 27.657471 |
| O  | 8.489436  | 1.338809  | 32.397902 |
| O  | 7.384907  | 4.061661  | 32.575168 |
| Ti | 6.799024  | 2.242710  | 32.095835 |
| O  | 6.575006  | 2.130135  | 30.263849 |
| O  | 8.016192  | 3.931795  | 28.014826 |
| Ti | 7.265286  | 2.129971  | 28.411314 |
| O  | 5.763730  | 0.587056  | 28.312320 |
| O  | 7.105190  | 6.802589  | 28.155971 |
| O  | 6.954669  | 6.623110  | 32.651508 |
| Ti | 11.862755 | 4.126054  | 31.856893 |
| O  | 12.013540 | 4.202193  | 30.009909 |
| O  | 13.754299 | 5.171222  | 27.684376 |
| Ti | 12.128684 | 4.147102  | 28.110230 |
| O  | 11.563875 | 2.207722  | 28.081305 |
| O  | 11.391191 | 2.278948  | 32.000773 |
| O  | 10.375547 | 4.808365  | 32.745999 |
| Ti | 8.709736  | 5.487816  | 32.159303 |
| O  | 8.802515  | 5.432986  | 30.312102 |
| O  | 10.698657 | 5.257000  | 27.638985 |
| Ti | 8.862792  | 5.661094  | 28.418938 |

48c-like 3-D (2,1,0)-mer

|    |           |           |           |
|----|-----------|-----------|-----------|
| Ti | -4.255175 | 6.883177  | -1.934543 |
| O  | -4.737343 | 7.317614  | -0.190240 |
| O  | -6.095041 | 6.365335  | 2.148041  |
| Ti | -4.361387 | 7.128669  | 1.645833  |
| O  | -3.299996 | 8.800270  | 1.977348  |
| O  | -3.133738 | 8.428654  | -2.246551 |
| O  | -2.902111 | 5.663431  | -2.353025 |
| Ti | -1.465261 | 4.488904  | -1.937658 |
| O  | -1.335336 | 4.501243  | -0.102846 |
| O  | -3.172569 | 5.727331  | 1.790056  |
| Ti | -1.491351 | 4.782146  | 1.790585  |
| O  | -0.107178 | 3.006748  | 2.182219  |
| O  | -0.150382 | 2.922226  | -2.615843 |
| Ti | -1.501425 | 8.560552  | -1.362581 |
| O  | -1.386476 | 10.060541 | -0.137772 |
| Ti | -1.425550 | 8.998316  | 1.401987  |
| O  | -1.432349 | 7.455093  | 0.221511  |
| O  | 0.422644  | 8.782834  | 2.175478  |
| O  | 0.013021  | 8.238602  | -2.376901 |
| O  | 0.278114  | 5.437183  | -2.429704 |
| Ti | 1.400854  | 6.976400  | -1.974019 |
| O  | 1.620999  | 7.229635  | -0.114025 |
| O  | 0.280079  | 5.756911  | 2.126767  |
| Ti | 1.567702  | 7.250005  | 1.759583  |
| O  | 3.489163  | 8.039664  | 2.142345  |
| O  | 2.976901  | 5.439536  | 1.682980  |
| O  | 2.863025  | 5.159859  | -1.755549 |
| O  | 3.068386  | 7.589069  | -2.749163 |
| O  | 4.868184  | 6.976042  | -0.266768 |
| Ti | 4.273624  | 6.378766  | -1.938936 |
| Ti | 4.553116  | 6.517373  | 1.524026  |
| Ti | 1.725541  | 3.822064  | 1.777249  |
| O  | 1.392181  | 3.545524  | -0.088482 |
| Ti | 1.525122  | 3.682508  | -1.921050 |
| O  | -5.884331 | 6.120947  | -2.541744 |
| O  | 2.787323  | 2.612523  | -2.850850 |
| Ti | 3.913275  | 1.306591  | -2.147377 |
| O  | 3.694189  | 1.278641  | -0.322487 |
| O  | 3.045897  | 2.568276  | 2.048004  |
| Ti | 4.229439  | 1.148856  | 1.536915  |
| O  | 5.543387  | -0.527749 | 2.224778  |
| O  | 5.387270  | -0.250402 | -2.555891 |
| O  | 6.094303  | 5.586993  | 1.998597  |
| O  | 5.704261  | 5.344621  | -2.579607 |
| O  | 5.736569  | 2.313349  | -2.324708 |
| Ti | 6.734294  | 3.894944  | -1.949134 |
| O  | 7.014114  | 3.924517  | -0.091410 |
| O  | 5.817983  | 2.383000  | 2.117061  |
| Ti | 7.030928  | 3.945237  | 1.833145  |
| O  | 8.992494  | 4.585671  | 2.258495  |
| O  | 8.537097  | 2.094928  | 2.022415  |
| O  | 8.416941  | 1.674409  | -1.587337 |

|    |            |           |           |
|----|------------|-----------|-----------|
| O  | 8.486605   | 4.188153  | -2.710569 |
| O  | 10.312729  | 3.904958  | -0.219538 |
| Ti | 9.653695   | 3.077121  | -1.777155 |
| O  | 11.164354  | 2.046343  | -2.368510 |
| Ti | 10.116364  | 3.162620  | 1.497479  |
| O  | 11.708735  | 2.425594  | 2.342253  |
| Ti | 11.893469  | 0.546998  | 1.526070  |
| Ti | 11.226283  | 0.548304  | -1.260118 |
| O  | 11.289378  | -1.224550 | 1.933877  |
| Ti | 9.632228   | -2.333299 | 1.619213  |
| O  | 10.049987  | -2.931524 | -0.107361 |
| O  | 10.666849  | -1.001355 | -2.049098 |
| Ti | 9.247614   | -2.306184 | -1.668409 |
| O  | 10.330545  | 1.156935  | 0.417270  |
| O  | 8.354817   | -0.970808 | 1.477754  |
| Ti | 7.291681   | 0.531334  | 1.920492  |
| O  | 12.781787  | 0.365646  | -0.107244 |
| O  | 6.206884   | 0.805611  | 0.236684  |
| O  | 7.886357   | -1.066581 | -1.541194 |
| Ti | 6.833849   | 0.536853  | -1.488720 |
| Ti | -6.827333  | 4.587446  | -1.926541 |
| O  | -7.109671  | 4.830672  | -0.089650 |
| O  | -8.718352  | 3.852347  | 2.372425  |
| Ti | -6.982873  | 4.668166  | 1.789612  |
| O  | -5.648290  | 3.240172  | -2.421387 |
| Ti | -4.301077  | 1.945788  | -2.048608 |
| O  | -4.324989  | 1.903741  | -0.187471 |
| O  | -5.804423  | 3.258332  | 1.955450  |
| Ti | -4.367227  | 2.016819  | 1.687105  |
| O  | -2.974748  | 0.324650  | 1.990614  |
| O  | -2.866884  | 0.347574  | -2.415236 |
| O  | -2.671728  | 2.951480  | -2.445192 |
| O  | -2.709770  | 3.092328  | 2.088209  |
| Ti | -1.233330  | 1.347416  | 1.781464  |
| O  | -1.205068  | 1.403179  | -0.135469 |
| Ti | -1.226998  | 1.344687  | -1.990448 |
| Ti | -11.087777 | -0.346472 | -1.114835 |
| Ti | -11.124866 | -0.815186 | 1.687984  |
| O  | -10.949742 | 1.294086  | -1.967244 |
| Ti | -9.314651  | 2.287230  | -1.694608 |
| O  | -9.647966  | 2.506440  | 0.164989  |
| O  | -11.175164 | 0.957267  | 2.592255  |
| Ti | -9.555967  | 2.126377  | 1.994997  |
| O  | -9.751454  | -0.535425 | 0.313764  |
| O  | -8.570070  | 3.875991  | -2.342704 |
| O  | -8.148659  | 0.985012  | -2.338959 |
| Ti | -6.957380  | -0.416926 | -1.888339 |
| O  | -12.373300 | -0.505009 | 0.278229  |
| O  | -6.718383  | -0.237933 | -0.074597 |
| O  | -8.285505  | 0.816055  | 2.291965  |
| Ti | -7.357092  | -0.761836 | 1.615673  |
| Ti | -9.704884  | -3.118292 | -1.993901 |

|    |            |           |           |
|----|------------|-----------|-----------|
| O  | -11.057170 | -1.795658 | -2.298705 |
| O  | -8.563484  | -2.339032 | 1.483864  |
| O  | -8.971527  | -4.997831 | 1.963301  |
| O  | -10.408943 | -4.003799 | -0.516841 |
| Ti | -9.993642  | -3.655957 | 1.267353  |
| O  | -11.404973 | -2.694874 | 2.001642  |
| O  | -8.278881  | -1.899661 | -1.832090 |
| O  | -5.702424  | -5.103525 | -2.748975 |
| O  | -6.140447  | -5.685171 | 2.284912  |
| O  | -5.946170  | -2.371089 | 2.074104  |
| Ti | -7.176228  | -4.154304 | 1.893144  |
| O  | -6.861020  | -3.987508 | -0.066936 |
| O  | -5.773176  | -2.190763 | -2.385400 |
| Ti | -6.817571  | -3.790896 | -1.913592 |
| O  | -8.525109  | -4.345569 | -2.724105 |
| O  | -5.352205  | 0.356233  | -2.716346 |
| O  | -5.610248  | 0.356164  | 2.142947  |
| O  | -3.084210  | -2.788932 | 2.183931  |
| Ti | -4.143946  | -1.309966 | 1.715637  |
| O  | -4.034913  | -1.332665 | -0.194520 |
| O  | -2.821297  | -2.441874 | -2.860314 |
| Ti | -4.016981  | -1.239041 | -2.064006 |
| O  | 0.013136   | 0.089993  | -2.646231 |
| Ti | 1.216986   | -1.230480 | -2.102486 |
| O  | 1.228874   | -1.326088 | -0.231410 |
| O  | -0.050783  | -0.087302 | 2.051270  |
| Ti | 1.187175   | -1.441341 | 1.663958  |
| O  | 2.626208   | -3.174186 | 2.038033  |
| O  | 2.661791   | -2.866691 | -2.473196 |
| O  | 2.881250   | -0.316345 | -2.646735 |
| O  | 2.922471   | -0.381459 | 2.024773  |
| O  | 8.694990   | -3.944988 | 2.135884  |
| Ti | 6.950822   | -4.767454 | 1.776211  |
| O  | 7.106354   | -4.891475 | -0.108886 |
| O  | 8.446454   | -3.798296 | -2.489012 |
| Ti | 6.776490   | -4.552559 | -1.914957 |
| O  | 6.044325   | -6.419254 | 2.314685  |
| O  | 5.669151   | -3.432065 | 1.881294  |
| Ti | 4.307218   | -2.124586 | 1.756031  |
| O  | 4.276421   | -1.835091 | -0.136058 |
| O  | 5.569117   | -3.217559 | -2.375730 |
| Ti | 4.285826   | -1.863628 | -1.992891 |
| Ti | -1.566870  | -3.533600 | -1.995831 |
| O  | -1.456076  | -3.281671 | -0.154831 |
| Ti | -1.767357  | -3.964555 | 1.574789  |
| Ti | -4.375318  | -6.161082 | -2.001840 |
| O  | -3.191148  | -5.382487 | 1.708569  |
| O  | -3.835539  | -8.021797 | 2.017620  |
| O  | -5.110030  | -6.779185 | -0.403898 |
| Ti | -4.725459  | -6.504907 | 1.404796  |
| O  | -2.928702  | -4.973150 | -1.703512 |
| Ti | 1.109245   | -8.410478 | 1.885995  |



|    |           |           |           |
|----|-----------|-----------|-----------|
| O  | 1.300388  | -9.521614 | 0.368507  |
| Ti | 1.427565  | -8.152095 | -0.927472 |
| O  | 1.326272  | -6.856683 | 0.619751  |
| O  | -0.010730 | -7.956362 | -2.040756 |
| O  | -0.729320 | -8.737547 | 2.230670  |
| O  | -0.532982 | -5.656447 | 2.163709  |
| Ti | -2.001649 | -7.390331 | 1.972818  |
| O  | -1.742430 | -6.966948 | 0.064676  |
| O  | -0.348345 | -5.275227 | -2.372067 |
| Ti | -1.524025 | -6.776372 | -1.754016 |
| O  | -3.117123 | -7.424861 | -2.637682 |
| O  | 0.122747  | -2.791768 | -2.703730 |
| O  | -0.014057 | -3.083941 | 2.155145  |
| Ti | 4.201078  | -7.062121 | 2.049253  |
| O  | 4.443810  | -7.061952 | 0.181130  |
| O  | 5.803018  | -6.139129 | -2.368818 |
| Ti | 4.172768  | -6.763477 | -1.665181 |
| O  | 3.053412  | -8.299886 | -1.837988 |
| O  | 2.918771  | -8.536087 | 2.650476  |
| O  | 2.990234  | -5.690097 | 2.399776  |
| Ti | 1.339585  | -4.852571 | 1.704536  |
| O  | 1.332928  | -4.338101 | -0.141561 |
| O  | 2.842416  | -5.594950 | -2.274174 |
| Ti | 1.429394  | -4.358730 | -1.980694 |
| Ti | -2.815615 | 8.322766  | 4.065201  |
| O  | -3.059840 | 8.323335  | 5.934261  |
| O  | -4.417161 | 7.397125  | 8.484411  |
| Ti | -2.787710 | 8.022440  | 7.780045  |
| O  | -1.666933 | 9.557969  | 7.953473  |
| O  | -1.532212 | 9.794854  | 3.464102  |
| O  | -1.606182 | 6.948664  | 3.718421  |
| Ti | 0.044533  | 6.109570  | 4.410372  |
| O  | 0.051844  | 5.594298  | 6.256141  |
| O  | -1.457594 | 6.852438  | 8.387379  |
| Ti | -0.045075 | 5.615450  | 8.095084  |
| O  | 1.261917  | 4.048260  | 8.817706  |
| O  | 1.397815  | 4.340324  | 3.960335  |
| Ti | 0.276703  | 9.668169  | 4.229520  |
| O  | 0.086274  | 10.779322 | 5.747082  |
| Ti | -0.041403 | 9.409285  | 7.042395  |
| O  | 0.059491  | 8.114289  | 5.495765  |
| O  | 1.397242  | 9.213317  | 8.155803  |
| O  | 2.115146  | 9.995328  | 3.884868  |
| O  | 1.916906  | 6.913823  | 3.951366  |
| Ti | 3.386971  | 8.647529  | 4.141915  |
| O  | 3.127769  | 8.222513  | 6.049500  |
| O  | 1.732733  | 6.531764  | 8.486380  |
| Ti | 2.909194  | 8.032378  | 7.868366  |
| O  | 4.502014  | 8.681820  | 8.752551  |
| O  | 4.314121  | 6.229738  | 7.819136  |
| O  | 4.576019  | 6.639592  | 4.401677  |
| O  | 5.220899  | 9.279292  | 4.098014  |

|    |           |           |          |
|----|-----------|-----------|----------|
| O  | 6.494573  | 8.034140  | 6.518419 |
| Ti | 6.110432  | 7.761376  | 4.709287 |
| Ti | 5.760392  | 7.414748  | 8.116842 |
| Ti | 2.951561  | 4.790564  | 8.110311 |
| O  | 2.841270  | 4.539879  | 6.268846 |
| Ti | 3.151460  | 5.221927  | 4.538472 |
| O  | -4.658594 | 7.678418  | 3.799993 |
| O  | 4.469048  | 4.045914  | 3.931091 |
| Ti | 5.527829  | 2.566438  | 4.399030 |
| O  | 5.418648  | 2.588757  | 6.309001 |
| O  | 4.205641  | 3.698340  | 8.974724 |
| Ti | 5.401160  | 2.495766  | 8.178577 |
| O  | 6.736822  | 0.900526  | 8.830359 |
| O  | 6.993982  | 0.900741  | 3.971152 |
| O  | 7.087285  | 6.360153  | 8.864208 |
| O  | 7.525852  | 6.942932  | 3.829159 |
| O  | 7.329884  | 3.627956  | 4.040096 |
| Ti | 8.560302  | 5.411177  | 4.221167 |
| O  | 8.244648  | 5.244346  | 6.180984 |
| O  | 7.157413  | 3.447491  | 8.499327 |
| Ti | 8.202007  | 5.047641  | 8.027708 |
| O  | 9.909588  | 5.603174  | 8.838389 |
| O  | 9.663078  | 3.157263  | 7.946689 |
| O  | 9.946920  | 3.595655  | 4.631510 |
| O  | 10.356065 | 6.254392  | 4.151547 |
| O  | 11.793349 | 5.260978  | 6.631612 |
| Ti | 11.377515 | 4.912161  | 4.847757 |
| O  | 12.789130 | 3.952214  | 4.113100 |
| Ti | 11.089198 | 4.375828  | 8.108628 |
| O  | 12.441937 | 3.053368  | 8.414800 |
| Ti | 12.474711 | 1.604725  | 7.230452 |
| Ti | 12.510948 | 2.072687  | 4.427802 |
| O  | 12.336251 | -0.035924 | 8.082956 |
| Ti | 10.701050 | -1.028726 | 7.810147 |
| O  | 11.033753 | -1.247909 | 5.950665 |
| O  | 12.561161 | 0.300663  | 3.523394 |
| Ti | 10.942165 | -0.868141 | 4.120200 |
| O  | 11.138375 | 1.793329  | 5.802312 |
| O  | 9.534447  | 0.273535  | 8.454214 |
| Ti | 8.341913  | 1.674245  | 8.002455 |
| O  | 13.760114 | 1.763352  | 5.837274 |
| O  | 8.103363  | 1.494710  | 6.188710 |
| O  | 9.670984  | 0.441497  | 3.823201 |
| Ti | 8.740589  | 2.018667  | 4.497836 |
| Ti | -5.564348 | 6.026428  | 4.338649 |
| O  | -5.719972 | 6.150496  | 6.224266 |
| O  | -7.060775 | 5.056322  | 8.604136 |
| Ti | -5.389703 | 5.810739  | 8.030368 |
| O  | -4.283244 | 4.689984  | 4.233511 |
| Ti | -2.923160 | 3.381557  | 4.358464 |
| O  | -2.892699 | 3.091135  | 6.251786 |
| O  | -4.183980 | 4.475415  | 8.491053 |

|    |            |           |          |
|----|------------|-----------|----------|
| Ti | -2.901567  | 3.120206  | 8.107348 |
| O  | -1.497126  | 1.573726  | 8.763195 |
| O  | -1.538968  | 1.638094  | 4.089959 |
| O  | -1.241974  | 4.430878  | 4.076545 |
| O  | -1.277430  | 4.123499  | 8.587492 |
| Ti | 0.167112   | 2.487197  | 8.217545 |
| O  | 0.154793   | 2.582349  | 6.346480 |
| Ti | 0.196745   | 2.697760  | 4.451156 |
| Ti | -10.507888 | 0.710887  | 4.589182 |
| Ti | -9.839620  | 0.709215  | 7.374931 |
| O  | -9.902797  | 2.482610  | 4.181323 |
| Ti | -8.245630  | 3.591545  | 4.495752 |
| O  | -8.663640  | 4.191353  | 6.222268 |
| O  | -9.278369  | 2.260200  | 8.164435 |
| Ti | -7.860373  | 3.565676  | 7.781353 |
| O  | -8.945770  | 0.102461  | 5.697128 |
| O  | -7.307896  | 5.202742  | 3.978762 |
| O  | -6.969723  | 2.227821  | 4.637731 |
| Ti | -5.907830  | 0.725145  | 4.193069 |
| O  | -11.395379 | 0.894776  | 6.222949 |
| O  | -4.820458  | 0.450288  | 5.877109 |
| O  | -6.497978  | 2.327482  | 7.651068 |
| Ti | -5.448803  | 0.720926  | 7.601158 |
| Ti | -8.732134  | -1.906073 | 4.618167 |
| O  | -10.324289 | -1.168196 | 3.772885 |
| O  | -7.034567  | -0.411638 | 7.698833 |
| O  | -7.099868  | -2.925678 | 8.825952 |
| O  | -8.927217  | -2.647668 | 6.334237 |
| Ti | -8.267987  | -1.817057 | 7.890537 |
| O  | -9.780146  | -0.787820 | 8.482628 |
| O  | -7.152457  | -0.838803 | 4.092191 |
| O  | -4.708502  | -4.330263 | 4.115872 |
| O  | -4.318996  | -4.088816 | 8.695212 |
| O  | -4.352261  | -1.056468 | 8.437974 |
| Ti | -5.347473  | -2.639019 | 8.063342 |
| O  | -5.628938  | -2.667950 | 6.206125 |
| O  | -4.434123  | -1.126479 | 3.996874 |
| Ti | -5.646549  | -2.689046 | 4.281143 |
| O  | -7.608173  | -3.329314 | 3.856186 |
| O  | -4.159701  | 1.785007  | 3.889668 |
| O  | -4.002924  | 1.506653  | 8.670945 |
| O  | -1.402653  | -1.355829 | 8.966332 |
| Ti | -2.528266  | -0.049714 | 8.262878 |
| O  | -2.308794  | -0.021153 | 6.438222 |
| O  | -1.662427  | -1.311335 | 4.068339 |
| Ti | -2.846228  | 0.108391  | 4.579089 |
| O  | 1.434028   | 1.342960  | 4.064182 |
| Ti | 2.617183   | -0.091405 | 4.333864 |
| O  | 2.589630   | -0.146342 | 6.250666 |
| O  | 1.370764   | 1.166569  | 8.761138 |
| Ti | 2.611304   | -0.087854 | 8.105708 |
| O  | 4.056363   | -1.694339 | 8.560009 |

|    |           |           |          |
|----|-----------|-----------|----------|
| O  | 4.093736  | -1.835667 | 4.026426 |
| O  | 4.358604  | 0.931748  | 4.123425 |
| O  | 4.251256  | 0.909044  | 8.530350 |
| O  | 9.956455  | -2.617173 | 8.457497 |
| Ti | 8.213936  | -3.328583 | 8.042243 |
| O  | 8.495783  | -3.572100 | 6.205040 |
| O  | 10.104655 | -2.594233 | 3.742926 |
| Ti | 8.369336  | -3.409682 | 4.325076 |
| O  | 7.270871  | -4.862030 | 8.657028 |
| O  | 7.033900  | -1.981847 | 8.535436 |
| Ti | 5.685499  | -0.688955 | 8.163008 |
| O  | 5.709024  | -0.647134 | 6.301157 |
| O  | 7.189634  | -2.000816 | 4.158925 |
| Ti | 5.751431  | -0.760558 | 4.427088 |
| Ti | -0.341721 | -2.564778 | 4.338243 |
| O  | -0.007709 | -2.287639 | 6.203900 |
| Ti | -0.140642 | -2.425898 | 8.036338 |
| Ti | -3.168359 | -5.260599 | 4.593445 |
| O  | -1.478375 | -3.903394 | 7.871191 |
| O  | -1.682492 | -6.333013 | 8.864976 |
| O  | -3.483866 | -5.720351 | 6.383059 |
| Ti | -2.888107 | -5.122868 | 8.054935 |
| O  | -1.592594 | -4.182604 | 4.434955 |
| Ti | 2.888564  | -7.301233 | 7.477229 |
| O  | 2.773157  | -8.801327 | 6.253084 |
| Ti | 2.811688  | -7.738719 | 4.712854 |
| O  | 2.818240  | -6.195599 | 5.893334 |
| O  | 0.963070  | -7.525374 | 3.940099 |
| O  | 1.373204  | -6.980892 | 8.491489 |
| O  | 1.106825  | -4.180387 | 8.544216 |
| Ti | -0.015400 | -5.719899 | 8.088630 |
| O  | -0.236363 | -5.973760 | 6.229191 |
| O  | 1.103732  | -4.499942 | 3.988441 |
| Ti | -0.183412 | -5.992977 | 4.355957 |
| O  | -2.104898 | -6.781905 | 3.971878 |
| O  | 1.491443  | -1.750768 | 3.932701 |
| O  | 1.534841  | -1.665429 | 8.730675 |
| Ti | 5.641798  | -5.624039 | 8.049738 |
| O  | 6.123596  | -6.057848 | 6.305549 |
| O  | 7.481893  | -5.107078 | 3.966651 |
| Ti | 5.747859  | -5.869347 | 4.469069 |
| O  | 4.686074  | -7.540873 | 4.137900 |
| O  | 4.520610  | -7.169631 | 8.361323 |
| O  | 4.287688  | -4.405340 | 8.468171 |
| Ti | 2.850076  | -3.231930 | 8.052005 |
| O  | 2.720038  | -3.244573 | 6.217347 |
| O  | 4.559033  | -4.468278 | 4.324818 |
| Ti | 2.875779  | -3.526234 | 4.324018 |

48c-like 3-D (2,1,1)-mer

|    |           |          |           |
|----|-----------|----------|-----------|
| Ti | -4.216247 | 6.933985 | -1.863897 |
| O  | -4.652113 | 7.273235 | -0.094601 |

|    |           |           |           |
|----|-----------|-----------|-----------|
| O  | -6.048366 | 6.269373  | 2.166401  |
| Ti | -4.289839 | 7.063511  | 1.756177  |
| O  | -3.274201 | 8.787874  | 2.059209  |
| O  | -3.118576 | 8.488634  | -2.170927 |
| O  | -2.887399 | 5.712041  | -2.371038 |
| Ti | -1.448252 | 4.521396  | -2.037913 |
| O  | -1.405497 | 4.412622  | -0.199864 |
| O  | -3.084481 | 5.673935  | 1.894759  |
| Ti | -1.529302 | 4.578418  | 1.701475  |
| O  | -0.150897 | 2.869912  | 2.047836  |
| O  | -0.108562 | 2.963630  | -2.739405 |
| Ti | -1.482506 | 8.627906  | -1.286304 |
| O  | -1.375782 | 10.137361 | -0.076045 |
| Ti | -1.414339 | 9.087797  | 1.486216  |
| O  | -1.412466 | 7.533163  | 0.290586  |
| O  | 0.368691  | 8.797405  | 2.288520  |
| O  | 0.007685  | 8.292874  | -2.333568 |
| O  | 0.275382  | 5.472885  | -2.489444 |
| Ti | 1.384613  | 7.006171  | -1.952603 |
| O  | 1.537468  | 7.137389  | -0.094243 |
| O  | 0.170724  | 5.660750  | 2.086590  |
| Ti | 1.410748  | 7.246042  | 1.794564  |
| O  | 3.310535  | 8.106673  | 2.065831  |
| O  | 2.876129  | 5.418828  | 1.815584  |
| O  | 2.862266  | 5.191758  | -1.826402 |
| O  | 3.058531  | 7.678121  | -2.671085 |
| O  | 4.794388  | 6.975513  | -0.200326 |
| Ti | 4.264839  | 6.447310  | -1.894379 |
| Ti | 4.456400  | 6.524206  | 1.619350  |
| Ti | 1.672961  | 3.749958  | 1.702020  |
| O  | 1.366052  | 3.559360  | -0.177116 |
| Ti | 1.563313  | 3.706396  | -2.006117 |
| O  | -5.861229 | 6.210729  | -2.486703 |
| O  | 2.824475  | 2.602836  | -2.894531 |
| Ti | 3.969415  | 1.277324  | -2.231617 |
| O  | 3.759768  | 1.241087  | -0.414903 |
| O  | 3.082361  | 2.580430  | 1.895260  |
| Ti | 4.324155  | 1.174977  | 1.459201  |
| O  | 5.669352  | -0.543065 | 2.140492  |
| O  | 5.463333  | -0.295594 | -2.654150 |
| O  | 6.067717  | 5.548627  | 1.857871  |
| O  | 5.674889  | 5.419140  | -2.617164 |
| O  | 5.783054  | 2.257333  | -2.432900 |
| Ti | 6.664009  | 3.898461  | -2.106704 |
| O  | 7.019712  | 3.870256  | -0.277862 |
| O  | 5.923053  | 2.404443  | 2.021489  |
| Ti | 7.093502  | 4.005731  | 1.647918  |
| O  | 8.994428  | 4.738899  | 1.931908  |
| O  | 8.580343  | 2.129630  | 1.958116  |
| O  | 8.573679  | 1.402286  | -1.663540 |
| O  | 8.407051  | 3.985115  | -2.893453 |
| O  | 10.220945 | 3.852618  | -0.320190 |

|    |            |           |           |
|----|------------|-----------|-----------|
| Ti | 9.612435   | 2.995814  | -1.851626 |
| O  | 11.162707  | 2.013230  | -2.397925 |
| Ti | 10.201473  | 3.151969  | 1.462835  |
| O  | 11.936282  | 2.511963  | 1.949596  |
| Ti | 12.008191  | 0.638495  | 1.453088  |
| Ti | 11.082925  | 0.508765  | -1.273811 |
| O  | 11.464216  | -1.163992 | 2.022423  |
| Ti | 9.796482   | -2.283612 | 1.733723  |
| O  | 10.146598  | -2.944467 | 0.005097  |
| O  | 10.571479  | -1.078546 | -2.084917 |
| Ti | 9.265967   | -2.389361 | -1.544141 |
| O  | 10.284425  | 1.050337  | 0.460854  |
| O  | 8.502626   | -0.933340 | 1.595755  |
| Ti | 7.378486   | 0.554308  | 1.825740  |
| O  | 12.724640  | 0.329786  | -0.253516 |
| O  | 6.256985   | 0.821488  | 0.155622  |
| O  | 7.796198   | -1.269096 | -1.351035 |
| Ti | 6.910306   | 0.426223  | -1.540749 |
| Ti | -6.783915  | 4.677096  | -1.852942 |
| O  | -7.124308  | 4.929091  | -0.042227 |
| O  | -8.778480  | 3.767489  | 2.405902  |
| Ti | -7.067644  | 4.611116  | 1.839218  |
| O  | -5.606257  | 3.302648  | -2.308849 |
| Ti | -4.205269  | 2.041890  | -2.055309 |
| O  | -4.099817  | 1.932284  | -0.217539 |
| O  | -5.880874  | 3.170775  | 1.918500  |
| Ti | -4.573828  | 1.811297  | 1.627344  |
| O  | -3.106876  | 0.133377  | 1.938790  |
| O  | -2.813162  | 0.355669  | -2.481167 |
| O  | -2.611523  | 2.972188  | -2.636859 |
| O  | -2.850477  | 2.925579  | 2.017824  |
| Ti | -1.365957  | 1.225802  | 1.636878  |
| O  | -1.181138  | 1.364408  | -0.271378 |
| Ti | -1.149386  | 1.373969  | -2.125432 |
| Ti | -10.885187 | -0.018413 | -0.838388 |
| Ti | -11.050997 | -0.907799 | 1.994063  |
| O  | -10.973049 | 1.595330  | -1.753373 |
| Ti | -9.215596  | 2.408068  | -1.611168 |
| O  | -9.252546  | 2.504948  | 0.231212  |
| O  | -11.129029 | 0.947402  | 2.697651  |
| Ti | -9.430017  | 1.928485  | 2.099537  |
| O  | -9.558350  | 0.000548  | 0.665164  |
| O  | -8.492576  | 3.945445  | -2.377030 |
| O  | -8.233906  | 0.923582  | -2.326878 |
| Ti | -6.847603  | -0.099053 | -1.615144 |
| O  | -12.138732 | -0.579336 | 0.409681  |
| O  | -6.581668  | 0.623681  | 0.058760  |
| O  | -8.032678  | 0.805303  | 2.771190  |
| Ti | -7.470405  | -0.659105 | 1.355995  |
| Ti | -9.247902  | -2.674811 | -1.520807 |
| O  | -10.503163 | -1.394303 | -2.067415 |
| O  | -9.088928  | -1.913695 | 2.075632  |

|    |            |           |           |
|----|------------|-----------|-----------|
| O  | -8.746995  | -4.859778 | 1.968720  |
| O  | -10.178641 | -3.802240 | -0.375768 |
| Ti | -9.980029  | -3.644654 | 1.464589  |
| O  | -11.530383 | -2.829296 | 2.086515  |
| O  | -7.976705  | -1.601430 | -0.575963 |
| O  | -5.454975  | -5.049083 | -2.767503 |
| O  | -6.125809  | -6.181765 | 2.065597  |
| O  | -6.294366  | -2.287233 | 1.700635  |
| Ti | -6.817516  | -4.348261 | 2.057755  |
| O  | -6.493362  | -4.184172 | 0.043873  |
| O  | -5.866235  | -1.970576 | -2.103082 |
| Ti | -6.425531  | -3.789995 | -1.745731 |
| O  | -8.174676  | -3.737992 | -2.569520 |
| O  | -5.304516  | 0.436906  | -2.672150 |
| O  | -5.691478  | 0.111322  | 2.263786  |
| O  | -3.375567  | -3.118541 | 2.232089  |
| Ti | -4.333401  | -1.531283 | 1.726477  |
| O  | -4.032111  | -1.341040 | -0.167554 |
| O  | -2.929564  | -2.504392 | -2.820290 |
| Ti | -3.958400  | -1.157331 | -2.027668 |
| O  | 0.065297   | 0.114996  | -2.812566 |
| Ti | 1.279482   | -1.183685 | -2.217068 |
| O  | 1.329594   | -1.226710 | -0.361570 |
| O  | -0.091913  | -0.133405 | 1.887721  |
| Ti | 1.254782   | -1.395536 | 1.538247  |
| O  | 2.679676   | -3.127455 | 1.924898  |
| O  | 2.685173   | -2.851009 | -2.582778 |
| O  | 2.963601   | -0.337685 | -2.801989 |
| O  | 2.998876   | -0.362294 | 1.900988  |
| O  | 8.768020   | -3.890200 | 2.213260  |
| Ti | 7.018680   | -4.761849 | 1.885917  |
| O  | 7.179128   | -4.896069 | -0.009039 |
| O  | 8.534412   | -3.902533 | -2.403341 |
| Ti | 6.845409   | -4.578177 | -1.819039 |
| O  | 6.045430   | -6.402856 | 2.447556  |
| O  | 5.710490   | -3.450462 | 1.916633  |
| Ti | 4.397694   | -2.098513 | 1.669314  |
| O  | 4.345598   | -1.854332 | -0.229664 |
| O  | 5.613946   | -3.287303 | -2.381050 |
| Ti | 4.353682   | -1.891108 | -2.085328 |
| Ti | -1.573265  | -3.505025 | -1.963123 |
| O  | -1.564179  | -3.143824 | -0.137606 |
| Ti | -1.721191  | -4.006326 | 1.534002  |
| Ti | -4.170120  | -6.254284 | -2.115883 |
| O  | -3.272057  | -5.493357 | 1.611741  |
| O  | -3.730693  | -8.224384 | 1.833544  |
| O  | -5.008050  | -7.087110 | -0.691370 |
| Ti | -4.688177  | -6.795261 | 1.141137  |
| O  | -2.830808  | -5.041889 | -1.582518 |
| Ti | 1.122117   | -8.299744 | 2.076099  |
| O  | 1.352660   | -9.437831 | 0.552810  |
| Ti | 1.589936   | -8.121800 | -0.756109 |

|    |           |           |           |
|----|-----------|-----------|-----------|
| O  | 1.466090  | -6.769523 | 0.752777  |
| O  | 0.218556  | -7.916894 | -1.959794 |
| O  | -0.704605 | -8.712538 | 2.390556  |
| O  | -0.508573 | -5.686043 | 1.984960  |
| Ti | -1.977182 | -7.410892 | 1.979098  |
| O  | -1.656614 | -7.033892 | 0.048773  |
| O  | -0.310491 | -5.218013 | -2.368408 |
| Ti | -1.334761 | -6.794950 | -1.745488 |
| O  | -2.845662 | -7.404989 | -2.802371 |
| O  | 0.097474  | -2.745860 | -2.659709 |
| O  | 0.031354  | -3.042983 | 1.920869  |
| Ti | 4.156867  | -6.855261 | 2.230816  |
| O  | 4.299272  | -6.625743 | 0.347179  |
| O  | 5.862580  | -6.169056 | -2.246952 |
| Ti | 4.191934  | -6.634678 | -1.543500 |
| O  | 3.247915  | -8.290836 | -1.605354 |
| O  | 2.924835  | -8.352553 | 2.783910  |
| O  | 3.044629  | -5.407125 | 2.789607  |
| Ti | 1.372033  | -4.816672 | 1.708322  |
| O  | 1.412197  | -4.320360 | -0.172924 |
| O  | 2.851354  | -5.591284 | -2.324338 |
| Ti | 1.477988  | -4.309010 | -1.998053 |
| Ti | -2.840143 | 8.476153  | 4.157441  |
| O  | -3.381790 | 9.040349  | 5.841216  |
| O  | -4.781739 | 7.647601  | 8.208609  |
| Ti | -3.074867 | 8.387913  | 7.590715  |
| O  | -1.804538 | 9.912790  | 7.908031  |
| O  | -1.494407 | 9.898934  | 3.534770  |
| O  | -1.555107 | 7.114681  | 4.106347  |
| Ti | -0.050882 | 5.922524  | 4.394510  |
| O  | 0.167859  | 5.722311  | 6.209102  |
| O  | -1.957827 | 6.936509  | 7.617729  |
| Ti | -0.222366 | 6.086215  | 8.063855  |
| O  | 1.207874  | 4.217894  | 8.436005  |
| O  | 1.360925  | 4.206831  | 3.888997  |
| Ti | 0.241358  | 9.824156  | 4.463249  |
| O  | 0.121646  | 11.220103 | 5.832175  |
| Ti | 0.049124  | 10.042731 | 7.280385  |
| O  | 0.114761  | 8.618227  | 5.976077  |
| O  | 1.846839  | 9.842410  | 8.193078  |
| O  | 2.069386  | 10.011959 | 3.991501  |
| O  | 1.759655  | 6.931275  | 3.928714  |
| Ti | 3.333121  | 8.627261  | 4.077044  |
| O  | 3.271257  | 8.259593  | 6.025358  |
| O  | 1.718507  | 6.961963  | 8.330373  |
| Ti | 3.153098  | 8.358182  | 7.838482  |
| O  | 5.025835  | 9.065405  | 8.400103  |
| O  | 4.387351  | 6.556599  | 8.407555  |
| O  | 4.578517  | 6.616619  | 3.859046  |
| O  | 5.214947  | 9.182078  | 4.182441  |
| O  | 6.383578  | 7.412899  | 6.493266  |
| Ti | 6.098501  | 7.607462  | 4.659909  |



|    |           |           |          |
|----|-----------|-----------|----------|
| Ti | 6.216933  | 7.359673  | 8.398264 |
| Ti | 2.962133  | 5.079133  | 8.042466 |
| O  | 3.022818  | 5.279632  | 6.161656 |
| Ti | 3.068751  | 5.229510  | 4.317296 |
| O  | -4.569651 | 7.539286  | 3.861759 |
| O  | 4.417348  | 3.950215  | 3.992216 |
| Ti | 5.675353  | 2.592234  | 4.225478 |
| O  | 5.843389  | 2.503875  | 6.095181 |
| O  | 4.282425  | 3.780295  | 8.296354 |
| Ti | 5.695899  | 2.564316  | 7.963424 |
| O  | 7.143061  | 0.905420  | 8.375765 |
| O  | 7.178208  | 0.854731  | 3.912766 |
| O  | 8.065880  | 6.752151  | 8.623844 |
| O  | 7.628468  | 7.006648  | 3.762691 |
| O  | 7.454197  | 3.738923  | 3.850971 |
| Ti | 8.759184  | 5.485923  | 3.845863 |
| O  | 8.703741  | 5.267518  | 5.823337 |
| O  | 7.241740  | 3.936311  | 8.256597 |
| Ti | 8.696522  | 5.061638  | 7.635968 |
| O  | 10.450831 | 5.919054  | 8.448755 |
| O  | 10.110662 | 3.428912  | 7.753960 |
| O  | 10.282006 | 3.407472  | 3.893586 |
| O  | 10.643439 | 6.105372  | 3.767219 |
| O  | 12.069140 | 5.221276  | 6.192201 |
| Ti | 11.640688 | 4.710027  | 4.440016 |
| O  | 13.231285 | 3.743719  | 3.973786 |
| Ti | 11.667810 | 4.509994  | 7.871198 |
| O  | 13.418204 | 3.571746  | 8.147446 |
| Ti | 13.403422 | 1.694206  | 7.391821 |
| Ti | 13.136335 | 1.984788  | 4.597658 |
| O  | 12.794966 | -0.017662 | 8.027825 |
| Ti | 11.208992 | -1.197908 | 7.626950 |
| O  | 11.838200 | -1.366469 | 5.825468 |
| O  | 12.790559 | 0.471051  | 3.480197 |
| Ti | 11.227797 | -0.825175 | 4.147911 |
| O  | 11.966008 | 2.090478  | 6.126198 |
| O  | 9.757529  | -0.065484 | 7.519698 |
| Ti | 9.056061  | 1.643632  | 8.018564 |
| O  | 14.525855 | 1.583657  | 5.877127 |
| O  | 8.608120  | 2.134075  | 6.184972 |
| O  | 9.988653  | 0.525522  | 4.092555 |
| Ti | 8.813307  | 2.078078  | 4.377341 |
| Ti | -5.715407 | 6.004590  | 4.330463 |
| O  | -6.191854 | 6.406384  | 6.107047 |
| O  | -7.441858 | 5.007957  | 8.409505 |
| Ti | -5.755146 | 5.959632  | 7.868691 |
| O  | -4.496046 | 4.591067  | 4.280849 |
| Ti | -3.123131 | 3.268298  | 4.199170 |
| O  | -2.871237 | 3.015721  | 6.055535 |
| O  | -4.520566 | 4.576728  | 7.922873 |
| Ti | -3.091061 | 3.292438  | 7.875589 |
| O  | -1.702984 | 1.559396  | 8.371447 |

|    |            |           |          |
|----|------------|-----------|----------|
| O  | -1.645940  | 1.546257  | 3.887631 |
| O  | -1.364078  | 4.336418  | 3.927529 |
| O  | -1.414557  | 4.372113  | 8.341828 |
| Ti | 0.038376   | 2.566488  | 8.053011 |
| O  | -0.004158  | 2.705581  | 6.162508 |
| Ti | 0.073552   | 2.581969  | 4.303603 |
| Ti | -10.632889 | 0.820946  | 4.838596 |
| Ti | -10.364929 | 0.529207  | 7.632969 |
| O  | -10.024319 | 2.532625  | 4.202879 |
| Ti | -8.438402  | 3.713068  | 4.603560 |
| O  | -9.068044  | 3.882702  | 6.404409 |
| O  | -10.019504 | 2.044086  | 8.749247 |
| Ti | -8.457161  | 3.340482  | 8.081539 |
| O  | -9.195116  | 0.423871  | 6.103985 |
| O  | -7.545278  | 5.311547  | 3.938988 |
| O  | -6.987224  | 2.580039  | 4.711297 |
| Ti | -6.286200  | 0.870881  | 4.212158 |
| O  | -11.754835 | 0.930255  | 6.357310 |
| O  | -5.836219  | 0.378858  | 6.044659 |
| O  | -7.218022  | 1.989289  | 8.135555 |
| Ti | -6.043702  | 0.435839  | 7.852145 |
| Ti | -8.897613  | -1.995474 | 4.359271 |
| O  | -10.647735 | -1.057391 | 4.082900 |
| O  | -7.513222  | -0.892550 | 8.335673 |
| O  | -7.873102  | -3.590923 | 8.463617 |
| O  | -9.299163  | -2.708169 | 6.037776 |
| Ti | -8.870778  | -2.196738 | 7.789694 |
| O  | -10.461645 | -1.229862 | 8.255464 |
| O  | -7.340238  | -0.914686 | 4.477238 |
| O  | -5.295772  | -4.238043 | 3.605703 |
| O  | -4.857110  | -4.492298 | 8.466750 |
| O  | -4.683908  | -1.225406 | 8.378330 |
| Ti | -5.988618  | -2.971605 | 8.384204 |
| O  | -5.933850  | -2.754037 | 6.406764 |
| O  | -4.470975  | -1.422981 | 3.973662 |
| Ti | -5.926554  | -2.547337 | 4.594334 |
| O  | -7.680316  | -3.404172 | 3.780629 |
| O  | -4.373429  | 1.609077  | 3.853808 |
| O  | -4.408571  | 1.659754  | 8.317002 |
| O  | -1.646961  | -1.435090 | 8.237792 |
| Ti | -2.905740  | -0.078030 | 8.003997 |
| O  | -3.072679  | 0.010830  | 6.134257 |
| O  | -1.512148  | -1.265505 | 3.933949 |
| Ti | -2.926117  | -0.050081 | 4.266130 |
| O  | 1.415517   | 1.286281  | 3.992555 |
| Ti | 2.730759   | -0.052299 | 4.176495 |
| O  | 2.772987   | -0.192376 | 6.067045 |
| O  | 1.354259   | 1.228383  | 8.236677 |
| Ti | 2.695934   | -0.067567 | 7.925862 |
| O  | 4.133454   | -1.821796 | 8.302284 |
| O  | 4.183714   | -1.857591 | 3.887520 |
| O  | 4.472263   | 0.955326  | 3.858442 |

|    |           |           |           |
|----|-----------|-----------|-----------|
| O  | 4.415478  | 0.968214  | 8.341652  |
| O  | 10.316467 | -2.796440 | 8.291078  |
| Ti | 8.486515  | -3.488620 | 7.899056  |
| O  | 8.962223  | -3.890096 | 6.122273  |
| O  | 10.212630 | -2.492597 | 3.820549  |
| Ti | 8.525514  | -3.444117 | 4.360525  |
| O  | 7.339850  | -5.023071 | 8.367396  |
| O  | 7.266165  | -2.074177 | 7.949110  |
| Ti | 5.892569  | -0.753848 | 8.030490  |
| O  | 5.640745  | -0.501788 | 6.174174  |
| O  | 7.289732  | -2.061865 | 4.306459  |
| Ti | 5.860124  | -0.777709 | 4.353991  |
| Ti | -0.192922 | -2.565586 | 4.187744  |
| O  | -0.254228 | -2.767825 | 6.068106  |
| Ti | -0.299048 | -2.715184 | 7.912588  |
| Ti | -3.447335 | -4.845809 | 3.831658  |
| O  | -1.808469 | -4.102549 | 8.370605  |
| O  | -2.444145 | -6.668050 | 8.048131  |
| O  | -3.613427 | -4.900236 | 5.736425  |
| Ti | -3.328116 | -5.093046 | 7.569938  |
| O  | -1.618173 | -4.043262 | 3.821914  |
| Ti | 2.530888  | -7.309310 | 7.764865  |
| O  | 2.650555  | -8.705305 | 6.397535  |
| Ti | 2.722187  | -7.527966 | 4.947586  |
| O  | 2.656036  | -6.103485 | 6.251816  |
| O  | 0.924217  | -7.328051 | 4.034697  |
| O  | 0.703421  | -7.495999 | 8.238438  |
| O  | 1.010397  | -4.417101 | 8.301296  |
| Ti | -0.562030 | -6.112857 | 8.152913  |
| O  | -0.501096 | -5.747144 | 6.204201  |
| O  | 1.050964  | -4.448107 | 3.899173  |
| Ti | -0.383153 | -5.844760 | 4.390729  |
| O  | -2.255717 | -6.551840 | 3.829301  |
| O  | 1.561160  | -1.703994 | 3.793997  |
| O  | 1.408494  | -1.692332 | 8.340446  |
| Ti | 5.610918  | -5.960277 | 8.072293  |
| O  | 6.151044  | -6.523965 | 6.387998  |
| O  | 7.552011  | -5.132256 | 4.020558  |
| Ti | 5.845174  | -5.872726 | 4.638067  |
| O  | 4.576092  | -7.398291 | 4.320128  |
| O  | 4.265151  | -7.382765 | 8.695478  |
| O  | 4.324515  | -4.599556 | 8.124391  |
| Ti | 2.820389  | -3.407692 | 7.835574  |
| O  | 2.601584  | -3.211489 | 6.020694  |
| O  | 4.727536  | -4.421689 | 4.611022  |
| Ti | 2.991640  | -3.571864 | 4.165921  |
| Ti | -1.386044 | 9.370518  | 9.997328  |
| O  | -1.529216 | 9.143234  | 11.881214 |
| O  | -3.092227 | 8.685284  | 14.476024 |
| Ti | -1.421422 | 9.151581  | 13.771199 |
| O  | -0.476729 | 10.807390 | 13.833567 |
| O  | -0.153362 | 10.867765 | 9.443907  |

|    |           |           |           |
|----|-----------|-----------|-----------|
| O  | -0.275358 | 7.921938  | 9.439774  |
| Ti | 1.397610  | 7.330889  | 10.520904 |
| O  | 1.357302  | 6.834550  | 12.402374 |
| O  | -0.081589 | 8.107269  | 14.552793 |
| Ti | 1.290856  | 6.823998  | 14.227450 |
| O  | 2.671517  | 5.261122  | 14.890144 |
| O  | 2.738372  | 5.557205  | 10.309199 |
| Ti | 1.649257  | 10.814459 | 10.152070 |
| O  | 1.417822  | 11.952899 | 11.674775 |
| Ti | 1.180745  | 10.636824 | 12.983649 |
| O  | 1.303919  | 9.284219  | 11.475138 |
| O  | 2.552027  | 10.432014 | 14.188059 |
| O  | 3.475901  | 11.226871 | 9.838450  |
| O  | 3.278234  | 8.200066  | 10.244061 |
| Ti | 4.747792  | 9.924647  | 10.250094 |
| O  | 4.427100  | 9.546681  | 12.180258 |
| O  | 3.079074  | 7.733380  | 14.597703 |
| Ti | 4.105085  | 9.309327  | 13.974677 |
| O  | 5.615859  | 9.920776  | 15.031261 |
| O  | 5.600841  | 7.556431  | 13.814164 |
| O  | 6.042001  | 8.007559  | 10.618237 |
| O  | 6.501012  | 10.738740 | 10.395496 |
| O  | 7.778192  | 9.601507  | 12.920607 |
| Ti | 7.458603  | 9.307905  | 11.088056 |
| Ti | 6.940565  | 8.770017  | 14.345639 |
| Ti | 4.342434  | 6.020197  | 14.193455 |
| O  | 4.334245  | 5.659751  | 12.367281 |
| Ti | 4.490934  | 6.520581  | 10.695307 |
| O  | -3.274762 | 8.918794  | 9.780863  |
| O  | 6.146177  | 5.632338  | 9.997720  |
| Ti | 7.103200  | 4.045618  | 10.503546 |
| O  | 6.802209  | 3.856318  | 12.397492 |
| O  | 5.698776  | 5.020401  | 15.050536 |
| Ti | 6.728094  | 3.672767  | 14.257872 |
| O  | 8.073857  | 2.078356  | 14.902599 |
| O  | 8.461288  | 2.402503  | 9.967231  |
| O  | 8.226494  | 7.565085  | 14.995946 |
| O  | 8.894871  | 8.696889  | 10.163694 |
| O  | 9.064541  | 4.801674  | 10.528123 |
| Ti | 9.587679  | 6.863357  | 10.171408 |
| O  | 9.263021  | 6.699000  | 12.185036 |
| O  | 8.635672  | 4.486150  | 14.333458 |
| Ti | 9.195676  | 6.305373  | 13.974889 |
| O  | 10.944758 | 6.253169  | 14.799268 |
| O  | 10.746360 | 4.117204  | 12.805880 |
| O  | 11.859149 | 4.428942  | 10.154422 |
| O  | 11.517312 | 7.375245  | 10.261007 |
| O  | 12.948881 | 6.317556  | 12.605596 |
| Ti | 12.750343 | 6.159550  | 10.765448 |
| O  | 14.300031 | 5.344445  | 10.143813 |
| Ti | 12.018173 | 5.189887  | 13.750550 |
| O  | 13.273777 | 3.909680  | 14.298130 |

|    |           |           |           |
|----|-----------|-----------|-----------|
| Ti | 13.655913 | 2.534183  | 13.069072 |
| Ti | 13.821299 | 3.423164  | 10.236314 |
| O  | 13.743319 | 0.920665  | 13.983402 |
| Ti | 11.985689 | 0.108761  | 13.842242 |
| O  | 12.022773 | 0.011374  | 11.999469 |
| O  | 13.899384 | 1.567611  | 9.532975  |
| Ti | 12.199749 | 0.586773  | 10.130236 |
| O  | 12.328664 | 2.515116  | 11.565821 |
| O  | 11.004187 | 1.592393  | 14.558338 |
| Ti | 9.617247  | 2.614733  | 13.846250 |
| O  | 14.909340 | 3.095196  | 11.820543 |
| O  | 9.352459  | 1.892190  | 12.172083 |
| O  | 10.803323 | 1.709380  | 9.459727  |
| Ti | 10.240349 | 3.174164  | 10.874677 |
| Ti | -4.247830 | 7.278025  | 10.343388 |
| O  | -4.408222 | 7.411809  | 12.238918 |
| O  | -5.762660 | 6.418413  | 14.633354 |
| Ti | -4.073962 | 7.094651  | 14.047879 |
| O  | -2.939989 | 5.966716  | 10.312492 |
| Ti | -1.628908 | 4.612828  | 10.560188 |
| O  | -1.576070 | 4.366923  | 12.459226 |
| O  | -2.843268 | 5.803161  | 14.611758 |
| Ti | -1.584991 | 4.405583  | 14.315012 |
| O  | -0.194887 | 2.852781  | 15.032345 |
| O  | -0.229589 | 2.876700  | 10.328609 |
| O  | 0.089736  | 5.641770  | 10.304561 |
| O  | 0.083727  | 5.365878  | 14.811971 |
| Ti | 1.489624  | 3.698743  | 14.447291 |
| O  | 1.439810  | 3.740538  | 12.591774 |
| Ti | 1.514115  | 3.910322  | 10.692038 |
| Ti | -9.236899 | 1.876272  | 10.776304 |
| Ti | -8.305454 | 2.004052  | 13.501530 |
| O  | -8.692449 | 3.678296  | 10.207071 |
| Ti | -7.024956 | 4.798953  | 10.495858 |
| O  | -7.374666 | 5.460218  | 12.224593 |
| O  | -7.796880 | 3.591900  | 14.314160 |
| Ti | -6.493825 | 4.905728  | 13.773201 |
| O  | -7.511525 | 1.461947  | 11.763151 |
| O  | -5.996689 | 6.405442  | 10.016339 |
| O  | -5.731414 | 3.448075  | 10.635389 |
| Ti | -4.609124 | 1.959585  | 10.403433 |
| O  | -9.949399 | 2.184679  | 12.483197 |
| O  | -3.487581 | 1.691350  | 12.073792 |
| O  | -5.023636 | 3.785386  | 13.579254 |
| Ti | -4.142576 | 2.087814  | 13.768782 |
| Ti | -7.432895 | -0.637714 | 10.765449 |
| O  | -9.168158 | 0.002449  | 10.278107 |
| O  | -5.810708 | 1.116006  | 13.885954 |
| O  | -5.635839 | -1.467256 | 15.124000 |
| O  | -7.451179 | -1.341196 | 12.547956 |
| Ti | -6.842188 | -0.483223 | 14.078708 |
| O  | -8.392964 | 0.497950  | 14.624231 |

|    |           |           |           |
|----|-----------|-----------|-----------|
| O  | -5.809673 | 0.383035  | 10.268787 |
| O  | -3.298141 | -3.033909 | 10.373440 |
| O  | -2.903421 | -2.904481 | 14.846504 |
| O  | -3.016088 | 0.258738  | 14.662134 |
| Ti | -3.892950 | -1.384457 | 14.336381 |
| O  | -4.251725 | -1.355493 | 12.508970 |
| O  | -3.153082 | 0.109147  | 10.208435 |
| Ti | -4.324133 | -1.491102 | 10.582076 |
| O  | -6.224889 | -2.225082 | 10.297393 |
| O  | -2.900541 | 3.057616  | 10.089528 |
| O  | -2.695271 | 2.809973  | 14.882744 |
| O  | -0.055998 | -0.087891 | 15.123909 |
| Ti | -1.200882 | 1.238160  | 14.461482 |
| O  | -0.990684 | 1.273802  | 12.644933 |
| O  | -0.311676 | -0.065557 | 10.334265 |
| Ti | -1.554470 | 1.339096  | 10.770072 |
| O  | 2.861137  | 2.648114  | 10.342008 |
| Ti | 4.134944  | 1.289185  | 10.592923 |
| O  | 3.950463  | 1.150615  | 12.500943 |
| O  | 2.703714  | 2.400256  | 15.042785 |
| Ti | 3.918735  | 1.141596  | 14.354972 |
| O  | 5.380789  | -0.456704 | 14.867249 |
| O  | 5.619639  | -0.411015 | 10.211852 |
| O  | 5.875970  | 2.381128  | 10.290983 |
| O  | 5.582259  | 2.160036  | 14.710771 |
| O  | 11.263192 | -1.429047 | 14.607507 |
| Ti | 9.554625  | -2.160350 | 14.083469 |
| O  | 9.894445  | -2.412303 | 12.272952 |
| O  | 11.549088 | -1.252349 | 9.824877  |
| Ti | 9.837771  | -2.095623 | 10.390992 |
| O  | 8.632451  | -3.694252 | 14.717465 |
| O  | 8.376041  | -0.786637 | 14.539506 |
| Ti | 6.974729  | 0.473793  | 14.285626 |
| O  | 6.870029  | 0.585256  | 12.447692 |
| O  | 8.650501  | -0.655370 | 10.311424 |
| Ti | 7.342569  | 0.702843  | 10.602610 |
| Ti | 1.096854  | -1.236025 | 10.527884 |
| O  | 1.403516  | -1.044330 | 12.407096 |
| Ti | 1.206038  | -1.190919 | 14.236138 |
| Ti | -1.686993 | -4.009996 | 10.610240 |
| O  | -0.091885 | -2.676989 | 14.055984 |
| O  | -0.286869 | -5.163596 | 14.900577 |
| O  | -2.024122 | -4.462135 | 12.430478 |
| Ti | -1.493264 | -3.933754 | 14.124068 |
| O  | -0.107036 | -2.904172 | 10.414260 |
| Ti | 4.255094  | -6.111608 | 13.517460 |
| O  | 4.148972  | -7.621125 | 12.307803 |
| Ti | 4.186583  | -6.571849 | 10.744910 |
| O  | 4.186734  | -5.017040 | 11.940892 |
| O  | 2.403522  | -6.281481 | 9.943772  |
| O  | 2.765341  | -5.776309 | 14.563633 |
| O  | 2.494317  | -2.957236 | 14.720363 |

|    |           |           |           |
|----|-----------|-----------|-----------|
| Ti | 1.387191  | -4.491297 | 14.182387 |
| O  | 1.233826  | -4.621869 | 12.324088 |
| O  | 2.598051  | -3.145386 | 10.144164 |
| Ti | 1.358821  | -4.731970 | 10.435208 |
| O  | -0.540406 | -5.592582 | 10.164229 |
| O  | 2.920454  | -0.355289 | 10.181823 |
| O  | 2.877728  | -0.448290 | 14.968966 |
| Ti | 6.987880  | -4.417248 | 14.093671 |
| O  | 7.422737  | -4.755432 | 12.324926 |
| O  | 8.818831  | -3.753731 | 10.063410 |
| Ti | 7.060202  | -4.547598 | 10.473331 |
| O  | 6.046110  | -6.273008 | 10.170359 |
| O  | 5.892758  | -5.972886 | 14.402659 |
| O  | 5.658102  | -3.196020 | 14.601261 |
| Ti | 4.218040  | -2.006232 | 14.268337 |
| O  | 4.175430  | -1.897609 | 12.430261 |
| O  | 5.853605  | -3.158918 | 10.334016 |
| Ti | 4.298417  | -2.063806 | 10.528732 |

48c-like 3-D (2,1,2)-mer

|    |           |           |           |
|----|-----------|-----------|-----------|
| Ti | -4.209779 | 6.966758  | -1.857816 |
| O  | -4.651426 | 7.319172  | -0.083669 |
| O  | -5.993234 | 6.253774  | 2.191435  |
| Ti | -4.270939 | 7.098931  | 1.764150  |
| O  | -3.308365 | 8.858689  | 2.130082  |
| O  | -3.194958 | 8.544300  | -2.273947 |
| O  | -2.882387 | 5.742677  | -2.390474 |
| Ti | -1.437938 | 4.536954  | -2.133810 |
| O  | -1.387382 | 4.415279  | -0.294234 |
| O  | -3.050961 | 5.715032  | 1.894785  |
| Ti | -1.584442 | 4.526714  | 1.601565  |
| O  | -0.171419 | 2.858169  | 1.946205  |
| O  | -0.084261 | 2.968594  | -2.847139 |
| Ti | -1.568566 | 8.673207  | -1.352175 |
| O  | -1.477190 | 10.176637 | -0.147308 |
| Ti | -1.486058 | 9.116901  | 1.424106  |
| O  | -1.611920 | 7.565035  | 0.191442  |
| O  | 0.307992  | 8.754142  | 1.975968  |
| O  | -0.043497 | 8.302111  | -2.354332 |
| O  | 0.279840  | 5.466974  | -2.630405 |
| Ti | 1.342184  | 7.007444  | -2.064505 |
| O  | 1.530803  | 7.025945  | -0.215117 |
| O  | 0.148051  | 5.618814  | 1.974512  |
| Ti | 1.367614  | 7.233545  | 1.669518  |
| O  | 3.240804  | 8.129351  | 1.967006  |
| O  | 2.867653  | 5.419588  | 1.760265  |
| O  | 2.884482  | 5.170879  | -1.969201 |
| O  | 3.019807  | 7.681203  | -2.777225 |
| O  | 4.755022  | 7.012971  | -0.304307 |
| Ti | 4.241353  | 6.461087  | -1.998957 |
| Ti | 4.409604  | 6.569042  | 1.514755  |
| Ti | 1.649049  | 3.748204  | 1.587636  |

|    |           |           |           |
|----|-----------|-----------|-----------|
| O  | 1.385050  | 3.543528  | -0.294006 |
| Ti | 1.592851  | 3.687509  | -2.124582 |
| O  | -5.855175 | 6.233740  | -2.465063 |
| O  | 2.884591  | 2.592353  | -2.992300 |
| Ti | 4.037763  | 1.283989  | -2.314431 |
| O  | 3.822659  | 1.269342  | -0.499568 |
| O  | 3.104776  | 2.621890  | 1.794140  |
| Ti | 4.353546  | 1.220061  | 1.387316  |
| O  | 5.725553  | -0.501087 | 2.071305  |
| O  | 5.549605  | -0.292026 | -2.711261 |
| O  | 6.030779  | 5.599373  | 1.746699  |
| O  | 5.694535  | 5.439194  | -2.674477 |
| O  | 5.869839  | 2.253335  | -2.489775 |
| Ti | 6.689021  | 3.924804  | -2.170390 |
| O  | 7.088378  | 3.905999  | -0.351381 |
| O  | 5.947572  | 2.463568  | 1.954361  |
| Ti | 7.101750  | 4.083720  | 1.582217  |
| O  | 8.997711  | 4.823194  | 1.908504  |
| O  | 8.581968  | 2.234587  | 1.967708  |
| O  | 8.689352  | 1.356688  | -1.640308 |
| O  | 8.429803  | 3.947604  | -2.978729 |
| O  | 10.211381 | 3.932010  | -0.373766 |
| Ti | 9.637712  | 3.028718  | -1.886306 |
| O  | 11.192822 | 2.044778  | -2.356259 |
| Ti | 10.210383 | 3.252838  | 1.416818  |
| O  | 11.954114 | 2.613663  | 1.812784  |
| Ti | 11.923653 | 0.711078  | 1.507629  |
| Ti | 10.966500 | 0.533181  | -1.226108 |
| O  | 11.461004 | -1.110656 | 2.138383  |
| Ti | 9.816032  | -2.278709 | 1.812313  |
| O  | 10.192951 | -2.928216 | 0.087305  |
| O  | 10.560960 | -1.083625 | -2.057283 |
| Ti | 9.298855  | -2.406283 | -1.468858 |
| O  | 10.175173 | 1.068978  | 0.545508  |
| O  | 8.535323  | -0.922181 | 1.635561  |
| Ti | 7.436682  | 0.604402  | 1.762952  |
| O  | 12.603439 | 0.336841  | -0.199026 |
| O  | 6.315405  | 0.879931  | 0.105635  |
| O  | 7.817301  | -1.284243 | -1.303830 |
| Ti | 6.973670  | 0.420533  | -1.572844 |
| Ti | -6.748927 | 4.698128  | -1.801547 |
| O  | -7.075768 | 4.925988  | 0.018382  |
| O  | -8.818212 | 3.801047  | 2.521932  |
| Ti | -7.068928 | 4.607411  | 1.903981  |
| O  | -5.579615 | 3.327156  | -2.283936 |
| Ti | -4.153228 | 2.076627  | -2.075681 |
| O  | -4.039401 | 1.985746  | -0.250928 |
| O  | -5.942486 | 3.120201  | 1.982152  |
| Ti | -4.663712 | 1.745497  | 1.568087  |
| O  | -3.143907 | 0.130171  | 1.898967  |
| O  | -2.773100 | 0.367123  | -2.516226 |
| O  | -2.580127 | 2.986107  | -2.737817 |



|    |            |           |           |
|----|------------|-----------|-----------|
| O  | -2.911153  | 2.913505  | 1.940619  |
| Ti | -1.425156  | 1.216318  | 1.552512  |
| O  | -1.154576  | 1.387515  | -0.350075 |
| Ti | -1.106464  | 1.380654  | -2.200329 |
| Ti | -10.857288 | 0.063334  | -0.749306 |
| Ti | -11.051571 | -0.863430 | 2.072217  |
| O  | -10.918029 | 1.675746  | -1.675292 |
| Ti | -9.167286  | 2.477599  | -1.489482 |
| O  | -9.210677  | 2.553239  | 0.353403  |
| O  | -11.107387 | 0.981066  | 2.834952  |
| Ti | -9.421311  | 1.937607  | 2.221241  |
| O  | -9.531456  | 0.057075  | 0.760353  |
| O  | -8.481496  | 4.013650  | -2.296118 |
| O  | -8.135101  | 1.018870  | -2.161695 |
| Ti | -6.737543  | -0.023448 | -1.491076 |
| O  | -12.131962 | -0.457038 | 0.484922  |
| O  | -6.378370  | 0.701802  | 0.190755  |
| O  | -7.998660  | 0.817053  | 2.849707  |
| Ti | -7.449815  | -0.644636 | 1.438610  |
| Ti | -9.195081  | -2.585931 | -1.439754 |
| O  | -10.477478 | -1.319980 | -1.965522 |
| O  | -9.068244  | -1.852155 | 2.181620  |
| O  | -8.728396  | -4.831236 | 2.062878  |
| O  | -10.081797 | -3.735462 | -0.292864 |
| Ti | -9.932645  | -3.584650 | 1.560112  |
| O  | -11.530248 | -2.775094 | 2.064881  |
| O  | -7.935981  | -1.460850 | -0.505599 |
| O  | -5.414910  | -5.016041 | -2.723051 |
| O  | -6.057365  | -6.160854 | 2.054450  |
| O  | -6.283803  | -2.289008 | 1.630083  |
| Ti | -6.797561  | -4.315879 | 2.125449  |
| O  | -6.515639  | -4.182290 | 0.068708  |
| O  | -5.825244  | -1.929095 | -2.007539 |
| Ti | -6.388787  | -3.758658 | -1.697141 |
| O  | -8.137291  | -3.622574 | -2.526098 |
| O  | -5.251748  | 0.453201  | -2.646866 |
| O  | -5.672685  | 0.039706  | 2.373902  |
| O  | -3.360806  | -3.169400 | 2.188574  |
| Ti | -4.340871  | -1.574346 | 1.736598  |
| O  | -3.955696  | -1.338621 | -0.155090 |
| O  | -2.886417  | -2.496766 | -2.826938 |
| Ti | -3.900232  | -1.146315 | -2.009493 |
| O  | 0.131614   | 0.135147  | -2.876490 |
| Ti | 1.351665   | -1.155178 | -2.271312 |
| O  | 1.400908   | -1.168680 | -0.417945 |
| O  | -0.117901  | -0.126304 | 1.785849  |
| Ti | 1.262832   | -1.356417 | 1.480104  |
| O  | 2.699570   | -3.067198 | 1.882982  |
| O  | 2.747620   | -2.825723 | -2.614535 |
| O  | 3.048328   | -0.334378 | -2.884337 |
| O  | 3.026394   | -0.322659 | 1.826158  |
| O  | 8.759003   | -3.872778 | 2.292703  |

|    |           |           |           |
|----|-----------|-----------|-----------|
| Ti | 7.002556  | -4.758126 | 1.973421  |
| O  | 7.220049  | -4.899283 | 0.082884  |
| O  | 8.595026  | -3.932853 | -2.316102 |
| Ti | 6.892703  | -4.594976 | -1.737095 |
| O  | 6.050324  | -6.414774 | 2.617688  |
| O  | 5.711476  | -3.434937 | 1.954699  |
| Ti | 4.428319  | -2.058844 | 1.614536  |
| O  | 4.420990  | -1.810520 | -0.278279 |
| O  | 5.685800  | -3.297810 | -2.357054 |
| Ti | 4.428537  | -1.887789 | -2.132968 |
| Ti | -1.520546 | -3.481017 | -1.969106 |
| O  | -1.504937 | -3.112148 | -0.146321 |
| Ti | -1.685201 | -4.009420 | 1.508118  |
| Ti | -4.122840 | -6.221868 | -2.087362 |
| O  | -3.206688 | -5.533541 | 1.598825  |
| O  | -3.642939 | -8.255072 | 1.834161  |
| O  | -4.948398 | -7.099902 | -0.681055 |
| Ti | -4.637826 | -6.834594 | 1.156035  |
| O  | -2.776336 | -5.020686 | -1.545754 |
| Ti | 1.286376  | -8.262644 | 2.096230  |
| O  | 1.312066  | -9.388216 | 0.524927  |
| Ti | 1.599212  | -8.066104 | -0.749672 |
| O  | 1.499954  | -6.704498 | 0.744702  |
| O  | 0.269538  | -7.871239 | -2.014539 |
| O  | -0.554235 | -8.644973 | 2.482706  |
| O  | -0.465969 | -5.656393 | 1.989157  |
| Ti | -1.882403 | -7.441850 | 1.968752  |
| O  | -1.572885 | -7.057346 | 0.040858  |
| O  | -0.267749 | -5.185236 | -2.376846 |
| Ti | -1.284158 | -6.772104 | -1.755506 |
| O  | -2.810315 | -7.367111 | -2.803182 |
| O  | 0.152276  | -2.718388 | -2.673263 |
| O  | 0.056967  | -3.027017 | 1.912531  |
| Ti | 4.167224  | -6.790652 | 2.262222  |
| O  | 4.356595  | -6.317731 | 0.396894  |
| O  | 5.929967  | -6.175180 | -2.187427 |
| Ti | 4.229739  | -6.531795 | -1.459283 |
| O  | 3.309832  | -8.198631 | -1.495320 |
| O  | 3.160359  | -8.395936 | 2.436289  |
| O  | 3.060381  | -5.309795 | 2.841575  |
| Ti | 1.414770  | -4.779162 | 1.703533  |
| O  | 1.450855  | -4.265093 | -0.183957 |
| O  | 2.908744  | -5.537392 | -2.342769 |
| Ti | 1.527753  | -4.274779 | -2.006683 |
| Ti | -2.812430 | 8.488119  | 4.199154  |
| O  | -3.238147 | 8.998984  | 5.935408  |
| O  | -4.681656 | 7.596092  | 8.236568  |
| Ti | -2.964903 | 8.436795  | 7.740712  |
| O  | -1.839520 | 10.092582 | 8.059507  |
| O  | -1.421330 | 9.896489  | 3.538851  |
| O  | -1.510770 | 7.148426  | 4.063743  |
| Ti | -0.067750 | 5.891871  | 4.230550  |

|    |           |           |          |
|----|-----------|-----------|----------|
| O  | 0.163388  | 5.696181  | 6.062433 |
| O  | -1.734219 | 7.057131  | 7.836676 |
| Ti | -0.108948 | 6.017617  | 7.911525 |
| O  | 1.278892  | 4.218966  | 8.270156 |
| O  | 1.370844  | 4.197391  | 3.782729 |
| Ti | 0.149538  | 10.004897 | 4.644138 |
| O  | 0.054753  | 11.443526 | 5.942085 |
| Ti | 0.023346  | 10.298411 | 7.435568 |
| O  | 0.042857  | 8.828782  | 6.156517 |
| O  | 1.851562  | 9.941992  | 8.186614 |
| O  | 1.893129  | 10.035203 | 3.987784 |
| O  | 1.694960  | 6.976678  | 3.816368 |
| Ti | 3.202652  | 8.654174  | 3.992786 |
| O  | 3.231474  | 8.339686  | 5.930407 |
| O  | 1.666467  | 7.040936  | 8.291094 |
| Ti | 3.111463  | 8.444259  | 7.770729 |
| O  | 4.996899  | 9.206297  | 8.229484 |
| O  | 4.481756  | 6.626274  | 8.151019 |
| O  | 4.553835  | 6.673999  | 3.756730 |
| O  | 5.078958  | 9.284614  | 3.926668 |
| O  | 6.467129  | 7.776196  | 6.222731 |
| Ti | 6.060281  | 7.776983  | 4.410997 |
| Ti | 6.222289  | 7.549645  | 8.086086 |
| Ti | 3.028812  | 5.161705  | 7.911026 |
| O  | 2.963247  | 5.463411  | 6.042759 |
| Ti | 3.049851  | 5.271728  | 4.203935 |
| O  | -4.536775 | 7.562043  | 3.909888 |
| O  | 4.430698  | 4.002818  | 3.996818 |
| Ti | 5.692474  | 2.641481  | 4.134513 |
| O  | 5.927091  | 2.401289  | 5.981653 |
| O  | 4.222950  | 3.721138  | 8.013034 |
| Ti | 5.579225  | 2.428241  | 7.832321 |
| O  | 7.067115  | 0.713030  | 8.219904 |
| O  | 7.227372  | 0.909707  | 3.858638 |
| O  | 7.930491  | 6.674841  | 8.359820 |
| O  | 7.610792  | 7.109538  | 3.589417 |
| O  | 7.442044  | 3.837145  | 3.782968 |
| Ti | 8.718762  | 5.590794  | 3.825705 |
| O  | 8.669387  | 5.273913  | 5.764877 |
| O  | 7.313682  | 3.596345  | 8.111571 |
| Ti | 8.702550  | 4.977056  | 7.597644 |
| O  | 10.518677 | 5.789566  | 8.135787 |
| O  | 10.168120 | 3.247561  | 8.173895 |
| O  | 10.398725 | 3.374784  | 3.804303 |
| O  | 10.625305 | 6.125188  | 3.729155 |
| O  | 12.086759 | 5.169422  | 6.139418 |
| Ti | 11.663319 | 4.753282  | 4.389857 |
| O  | 13.270512 | 3.694552  | 4.071569 |
| Ti | 11.824878 | 4.283684  | 7.805706 |
| O  | 13.645063 | 3.589706  | 8.287479 |
| Ti | 13.640061 | 1.704955  | 7.636627 |
| Ti | 13.092753 | 2.024593  | 4.835465 |

|    |            |           |          |
|----|------------|-----------|----------|
| O  | 12.939819  | -0.015004 | 8.110571 |
| Ti | 11.222953  | -1.063945 | 7.739385 |
| O  | 11.818263  | -1.229264 | 5.921449 |
| O  | 12.622579  | 0.646861  | 3.608038 |
| Ti | 11.171754  | -0.786861 | 4.232555 |
| O  | 12.084514  | 2.365424  | 6.507210 |
| O  | 9.891335   | 0.228967  | 7.708714 |
| Ti | 8.759496   | 1.741764  | 7.875486 |
| O  | 14.545925  | 1.509526  | 5.993344 |
| O  | 8.755440   | 2.488803  | 6.095954 |
| O  | 9.903720   | 0.537238  | 4.226906 |
| Ti | 8.833632   | 2.180628  | 4.282263 |
| Ti | -5.683503  | 6.023369  | 4.369643 |
| O  | -6.147603  | 6.396571  | 6.157541 |
| O  | -7.474423  | 5.096513  | 8.486180 |
| Ti | -5.749167  | 5.948159  | 7.936247 |
| O  | -4.480514  | 4.601787  | 4.276975 |
| Ti | -3.134345  | 3.253602  | 4.141379 |
| O  | -2.902405  | 3.028446  | 6.013045 |
| O  | -4.493970  | 4.580229  | 7.975410 |
| Ti | -3.106953  | 3.253196  | 7.842857 |
| O  | -1.698264  | 1.540439  | 8.296365 |
| O  | -1.651589  | 1.550903  | 3.805984 |
| O  | -1.381873  | 4.318044  | 3.830988 |
| O  | -1.419853  | 4.353850  | 8.249112 |
| Ti | 0.082113   | 2.561549  | 7.919917 |
| O  | -0.008988  | 2.731186  | 6.043691 |
| Ti | 0.069581   | 2.571787  | 4.182831 |
| Ti | -10.556803 | 0.702158  | 4.997947 |
| Ti | -9.965101  | 0.248549  | 7.864273 |
| O  | -9.845808  | 2.379775  | 4.408579 |
| Ti | -8.406061  | 3.768812  | 4.671368 |
| O  | -9.096844  | 4.134471  | 6.394760 |
| O  | -9.965379  | 2.148253  | 8.604677 |
| Ti | -8.503237  | 3.464309  | 8.038917 |
| O  | -9.081213  | -0.191861 | 6.010909 |
| O  | -7.519203  | 5.364572  | 3.951301 |
| O  | -6.962239  | 2.625211  | 4.828324 |
| Ti | -6.261141  | 0.923193  | 4.269393 |
| O  | -11.403807 | 0.864626  | 6.615907 |
| O  | -5.697784  | 0.408178  | 6.054464 |
| O  | -7.225620  | 2.141438  | 7.983178 |
| Ti | -6.095603  | 0.531603  | 7.834914 |
| Ti | -8.860405  | -1.895014 | 4.475793 |
| O  | -10.707814 | -1.119171 | 4.115267 |
| O  | -7.816461  | -0.575332 | 8.214158 |
| O  | -7.588114  | -3.453033 | 8.450733 |
| O  | -9.184166  | -3.044581 | 5.922352 |
| Ti | -8.746359  | -2.337711 | 7.604965 |
| O  | -10.375524 | -1.589943 | 8.235229 |
| O  | -7.171293  | -0.915681 | 4.552882 |
| O  | -5.272929  | -4.238726 | 3.634497 |

|    |           |           |          |
|----|-----------|-----------|----------|
| O  | -4.858215 | -4.819911 | 8.492641 |
| O  | -4.757945 | -1.123672 | 8.358978 |
| Ti | -5.636142 | -3.042471 | 8.539368 |
| O  | -5.686286 | -2.802561 | 6.528318 |
| O  | -4.343128 | -1.529793 | 3.976557 |
| Ti | -5.834504 | -2.549285 | 4.724242 |
| O  | -7.569809 | -3.278326 | 3.791815 |
| O  | -4.359917 | 1.597625  | 3.817532 |
| O  | -4.396951 | 1.652159  | 8.333489 |
| O  | -1.726178 | -1.477721 | 8.321278 |
| Ti | -2.966474 | -0.104912 | 7.981841 |
| O  | -2.948532 | 0.014108  | 6.110509 |
| O  | -1.445333 | -1.212349 | 3.858221 |
| Ti | -2.916781 | -0.062359 | 4.232645 |
| O  | 1.437938  | 1.310069  | 3.874073 |
| Ti | 2.765971  | -0.009281 | 4.082202 |
| O  | 2.778855  | -0.179102 | 5.963584 |
| O  | 1.297848  | 1.136185  | 8.091944 |
| Ti | 2.599031  | -0.221779 | 7.816777 |
| O  | 4.037267  | -1.979909 | 8.242527 |
| O  | 4.219802  | -1.791391 | 3.812698 |
| O  | 4.504729  | 1.001612  | 3.760112 |
| O  | 4.327182  | 0.838578  | 8.224744 |
| O  | 10.205646 | -2.656260 | 8.233664 |
| Ti | 8.447445  | -3.575985 | 7.963718 |
| O  | 8.948061  | -3.960051 | 6.184981 |
| O  | 10.245010 | -2.503979 | 3.903299 |
| Ti | 8.540013  | -3.433027 | 4.434510 |
| O  | 7.380675  | -5.156548 | 8.512370 |
| O  | 7.151495  | -2.240097 | 7.939029 |
| Ti | 5.765119  | -0.927067 | 7.932040 |
| O  | 5.609638  | -0.536354 | 6.091456 |
| O  | 7.350260  | -2.009008 | 4.336671 |
| Ti | 5.915083  | -0.726997 | 4.273012 |
| Ti | -0.181606 | -2.543777 | 4.135260 |
| O  | -0.372325 | -2.805659 | 6.010150 |
| Ti | -0.411602 | -2.784138 | 7.845417 |
| Ti | -3.439465 | -4.882207 | 3.761173 |
| O  | -1.979140 | -4.186610 | 8.140804 |
| O  | -2.471812 | -6.866560 | 8.005156 |
| O  | -3.688911 | -5.150381 | 5.644862 |
| Ti | -3.438021 | -5.369051 | 7.458906 |
| O  | -1.618002 | -4.047199 | 3.822865 |
| Ti | 2.400412  | -7.144723 | 8.182785 |
| O  | 2.520484  | -8.317844 | 6.640482 |
| Ti | 2.582779  | -7.009608 | 5.317576 |
| O  | 2.545502  | -5.687779 | 6.765963 |
| O  | 1.111670  | -7.210163 | 4.030110 |
| O  | 0.578640  | -7.531229 | 8.552478 |
| O  | 0.829646  | -4.506473 | 8.325645 |
| Ti | -0.662662 | -6.168893 | 8.193976 |
| O  | -0.427335 | -5.911900 | 6.203481 |

|    |           |           |           |
|----|-----------|-----------|-----------|
| O  | 1.069344  | -4.427843 | 3.930032  |
| Ti | -0.392444 | -5.814015 | 4.386119  |
| O  | -2.199360 | -6.578626 | 3.816844  |
| O  | 1.570404  | -1.658787 | 3.734926  |
| O  | 1.340800  | -1.821320 | 8.235481  |
| Ti | 5.588101  | -5.977567 | 8.240688  |
| O  | 6.033534  | -6.487738 | 6.491436  |
| O  | 7.511345  | -5.091058 | 4.112548  |
| Ti | 5.788319  | -5.787103 | 4.751180  |
| O  | 4.276591  | -7.142582 | 4.480917  |
| O  | 4.193705  | -7.361845 | 8.926763  |
| O  | 4.367946  | -4.586404 | 8.288282  |
| Ti | 2.689201  | -3.637042 | 7.781650  |
| O  | 2.528158  | -3.168609 | 5.968363  |
| O  | 4.718324  | -4.305682 | 4.713684  |
| Ti | 3.000085  | -3.461114 | 4.140660  |
| Ti | -1.448897 | 9.746907  | 10.142733 |
| O  | -1.908418 | 10.273095 | 11.881873 |
| O  | -3.368194 | 8.859905  | 14.247355 |
| Ti | -1.644917 | 9.565042  | 13.614785 |
| O  | -0.130857 | 10.920576 | 13.874225 |
| O  | -0.035149 | 11.122569 | 9.462444  |
| O  | -0.226239 | 8.356139  | 10.097986 |
| Ti | 1.455419  | 7.388004  | 10.566954 |
| O  | 1.624271  | 6.901188  | 12.376610 |
| O  | -0.562940 | 8.090043  | 13.642108 |
| Ti | 1.159086  | 7.234308  | 14.195719 |
| O  | 2.587568  | 5.431210  | 14.619251 |
| O  | 2.819646  | 5.576996  | 10.117826 |
| Ti | 1.763705  | 10.873086 | 10.187067 |
| O  | 1.660294  | 12.043382 | 11.732417 |
| Ti | 1.571829  | 10.739919 | 13.053543 |
| O  | 1.608347  | 9.415745  | 11.609089 |
| O  | 3.045195  | 10.977922 | 14.336316 |
| O  | 3.576017  | 11.287377 | 9.797276  |
| O  | 3.323691  | 8.270747  | 10.043657 |
| Ti | 4.831236  | 9.942684  | 10.163338 |
| O  | 4.584649  | 9.680132  | 12.150527 |
| O  | 3.093440  | 8.194072  | 14.406811 |
| Ti | 4.552077  | 9.589143  | 13.967420 |
| O  | 6.356586  | 10.363598 | 14.525311 |
| O  | 5.780464  | 7.822357  | 14.520358 |
| O  | 6.136576  | 7.967643  | 10.238604 |
| O  | 6.629041  | 10.659457 | 10.352020 |
| O  | 7.862512  | 8.965886  | 12.711507 |
| Ti | 7.599591  | 9.160377  | 10.896092 |
| Ti | 7.593792  | 8.666227  | 14.587145 |
| Ti | 4.346178  | 6.310849  | 14.229048 |
| O  | 4.541877  | 6.534478  | 12.350475 |
| Ti | 4.562221  | 6.553895  | 10.516984 |
| O  | -3.234429 | 8.913005  | 9.860801  |
| O  | 5.907367  | 5.281546  | 9.997920  |

|    |           |           |           |
|----|-----------|-----------|-----------|
| Ti | 7.106515  | 3.871844  | 10.354198 |
| O  | 7.058598  | 3.761627  | 12.228814 |
| O  | 5.609284  | 4.984222  | 14.535480 |
| Ti | 7.061558  | 3.825731  | 14.106856 |
| O  | 8.506805  | 2.178932  | 14.522295 |
| O  | 8.541218  | 2.104528  | 9.993548  |
| O  | 9.415904  | 7.997511  | 14.716658 |
| O  | 8.995931  | 8.596188  | 9.843435  |
| O  | 8.910347  | 4.864143  | 9.985893  |
| Ti | 9.755432  | 6.802083  | 9.809000  |
| O  | 9.774133  | 6.579578  | 11.818829 |
| O  | 8.496184  | 5.284393  | 14.367331 |
| Ti | 9.972173  | 6.318278  | 13.613107 |
| O  | 11.711213 | 7.058075  | 14.541860 |
| O  | 11.321593 | 4.701432  | 13.742132 |
| O  | 11.985815 | 4.294438  | 10.100925 |
| O  | 11.710147 | 7.170117  | 9.930304  |
| O  | 13.340809 | 6.848353  | 12.413353 |
| Ti | 12.901261 | 6.075029  | 10.756331 |
| O  | 14.533804 | 5.380977  | 10.067270 |
| Ti | 13.008053 | 5.696490  | 13.851720 |
| O  | 14.854260 | 4.912668  | 14.210322 |
| Ti | 14.696985 | 3.102147  | 13.309681 |
| Ti | 14.132914 | 3.537157  | 10.419504 |
| O  | 13.958590 | 1.440190  | 13.887910 |
| Ti | 12.546630 | 0.016418  | 13.643850 |
| O  | 13.243167 | -0.355964 | 11.926152 |
| O  | 14.108381 | 1.625887  | 9.706438  |
| Ti | 12.656494 | 0.302087  | 10.274334 |
| O  | 13.246981 | 4.042283  | 12.278541 |
| O  | 11.100703 | 1.155702  | 13.503485 |
| Ti | 10.408227 | 2.865292  | 14.062630 |
| O  | 15.543456 | 2.914077  | 11.691596 |
| O  | 9.842304  | 3.344256  | 12.270581 |
| O  | 11.359690 | 1.599480  | 10.332455 |
| Ti | 10.243837 | 3.219673  | 10.490058 |
| Ti | -4.300888 | 7.326643  | 10.389386 |
| O  | -4.801113 | 7.707494  | 12.169515 |
| O  | -6.099003 | 6.264589  | 14.446911 |
| Ti | -4.390150 | 7.193738  | 13.923382 |
| O  | -3.009991 | 5.986687  | 10.405924 |
| Ti | -1.618294 | 4.678587  | 10.407184 |
| O  | -1.470412 | 4.294347  | 12.250287 |
| O  | -3.195863 | 5.776243  | 14.018723 |
| Ti | -1.753344 | 4.500651  | 14.069140 |
| O  | -0.345855 | 2.771197  | 14.584710 |
| O  | -0.176411 | 2.915895  | 10.121586 |
| O  | 0.109314  | 5.734845  | 10.104164 |
| O  | -0.065009 | 5.569618  | 14.528744 |
| Ti | 1.394003  | 3.782465  | 14.262817 |
| O  | 1.360708  | 3.938852  | 12.381674 |
| Ti | 1.551049  | 3.980077  | 10.529283 |

|    |            |           |           |
|----|------------|-----------|-----------|
| Ti | -9.493571  | 2.061073  | 10.674746 |
| Ti | -8.949171  | 1.750857  | 13.482149 |
| O  | -8.790577  | 3.781284  | 10.206180 |
| Ti | -7.070112  | 4.818321  | 10.589182 |
| O  | -7.658074  | 4.973677  | 12.411779 |
| O  | -8.477626  | 3.115126  | 14.725708 |
| Ti | -7.022917  | 4.548239  | 14.109975 |
| O  | -7.939307  | 1.404940  | 11.812549 |
| O  | -6.061805  | 6.419105  | 10.099046 |
| O  | -5.737265  | 3.528804  | 10.609897 |
| Ti | -4.612716  | 2.008952  | 10.457624 |
| O  | -10.401046 | 2.255994  | 12.319741 |
| O  | -4.605260  | 1.302211  | 12.247230 |
| O  | -5.751735  | 3.228244  | 14.132050 |
| Ti | -4.670309  | 1.592070  | 14.063355 |
| Ti | -7.669738  | -0.516595 | 10.530111 |
| O  | -9.470226  | 0.182467  | 10.006648 |
| O  | -6.232774  | 0.390885  | 14.531956 |
| O  | -6.481815  | -2.344565 | 14.629360 |
| O  | -7.933165  | -1.387402 | 12.203151 |
| Ti | -7.513313  | -0.973635 | 13.956838 |
| O  | -9.122234  | 0.086982  | 14.257788 |
| O  | -6.014667  | 0.505417  | 10.147284 |
| O  | -3.760555  | -2.929171 | 9.991862  |
| O  | -3.466519  | -3.323387 | 14.757921 |
| O  | -3.281069  | -0.061995 | 14.561556 |
| Ti | -4.575076  | -1.804684 | 14.518440 |
| O  | -4.517132  | -1.500003 | 12.575436 |
| O  | -3.173785  | 0.161490  | 10.225962 |
| Ti | -4.540965  | -1.243016 | 10.736487 |
| O  | -6.368748  | -2.040296 | 10.225271 |
| O  | -2.916716  | 3.036445  | 10.112391 |
| O  | -3.063748  | 2.861961  | 14.481867 |
| O  | -0.269552  | -0.234538 | 14.358228 |
| Ti | -1.527279  | 1.127983  | 14.208068 |
| O  | -1.771638  | 1.348213  | 12.360105 |
| O  | -0.073906  | 0.035596  | 10.329515 |
| Ti | -1.433333  | 1.325862  | 10.507279 |
| O  | 2.863554   | 2.629801  | 10.262249 |
| Ti | 4.072029   | 1.197408  | 10.424552 |
| O  | 4.170553   | 1.019245  | 12.299037 |
| O  | 2.721761   | 2.460142  | 14.456771 |
| Ti | 4.083465   | 1.187854  | 14.158811 |
| O  | 5.541958   | -0.553556 | 14.514242 |
| O  | 5.576730   | -0.595264 | 10.090834 |
| O  | 5.851437   | 2.220380  | 10.042906 |
| O  | 5.801419   | 2.213921  | 14.535284 |
| O  | 11.684285  | -1.583479 | 14.384126 |
| Ti | 9.851156   | -2.252442 | 13.977897 |
| O  | 10.306968  | -2.621040 | 12.186782 |
| O  | 11.639933  | -1.344641 | 9.838799  |
| Ti | 9.915570   | -2.186572 | 10.401943 |



|    |           |           |           |
|----|-----------|-----------|-----------|
| O  | 8.723635  | -3.797053 | 14.457465 |
| O  | 8.639057  | -0.838018 | 14.071524 |
| Ti | 7.292898  | 0.511797  | 14.200277 |
| O  | 7.070855  | 0.734459  | 12.326513 |
| O  | 8.655454  | -0.823048 | 10.357077 |
| Ti | 7.264538  | 0.501259  | 10.495187 |
| Ti | 1.124348  | -1.400363 | 10.439911 |
| O  | 1.185828  | -1.699733 | 12.308738 |
| Ti | 1.106305  | -1.512452 | 14.147564 |
| Ti | -2.057897 | -3.811413 | 10.300855 |
| O  | -0.393012 | -2.913151 | 14.604739 |
| O  | -0.927730 | -5.517420 | 14.482502 |
| O  | -2.316083 | -4.050312 | 12.158135 |
| Ti | -1.908501 | -4.020034 | 13.971430 |
| O  | -0.338080 | -2.862969 | 10.215883 |
| Ti | 4.012145  | -6.213790 | 13.756063 |
| O  | 4.106995  | -7.655825 | 12.458798 |
| Ti | 4.125415  | -6.518750 | 10.960991 |
| O  | 4.097480  | -5.044748 | 12.232741 |
| O  | 2.300654  | -6.194760 | 10.185782 |
| O  | 2.260570  | -6.274505 | 14.400434 |
| O  | 2.462075  | -3.210524 | 14.538699 |
| Ti | 0.951868  | -4.896666 | 14.381896 |
| O  | 0.920552  | -4.587803 | 12.443476 |
| O  | 2.485554  | -3.280251 | 10.072124 |
| Ti | 1.058871  | -4.685189 | 10.601095 |
| O  | -0.824441 | -5.454132 | 10.140268 |
| O  | 2.875253  | -0.459084 | 10.079502 |
| O  | 2.785990  | -0.435125 | 14.564772 |
| Ti | 6.991425  | -4.711113 | 14.169381 |
| O  | 7.419210  | -5.219339 | 12.432330 |
| O  | 8.855149  | -3.841746 | 10.110581 |
| Ti | 7.132886  | -4.661233 | 10.629564 |
| O  | 5.980700  | -6.302004 | 10.330293 |
| O  | 5.614243  | -6.124027 | 14.825312 |
| O  | 5.689578  | -3.369819 | 14.286664 |
| Ti | 4.227438  | -2.131116 | 14.115461 |
| O  | 3.988530  | -1.939741 | 12.284927 |
| O  | 5.907801  | -3.276898 | 10.532798 |
| Ti | 4.267065  | -2.258835 | 10.433938 |
| Ti | -0.011427 | 10.569709 | 16.082584 |
| O  | -0.179056 | 10.064001 | 17.941022 |
| O  | -1.762920 | 9.963716  | 20.517530 |
| Ti | -0.059526 | 10.313940 | 19.793915 |
| O  | 0.854000  | 11.983951 | 19.804569 |
| O  | 0.979121  | 12.186304 | 15.923287 |
| O  | 1.110021  | 9.103192  | 15.473584 |
| Ti | 2.738625  | 8.568379  | 16.636497 |
| O  | 2.686982  | 8.063557  | 18.525775 |
| O  | 1.259524  | 9.343322  | 20.707790 |
| Ti | 2.620124  | 8.068108  | 20.349429 |
| O  | 3.993451  | 6.512886  | 21.027293 |

|    |           |           |           |
|----|-----------|-----------|-----------|
| O  | 4.093091  | 6.811722  | 16.438809 |
| Ti | 2.857830  | 12.063368 | 16.242972 |
| O  | 2.857179  | 13.188324 | 17.814399 |
| Ti | 2.576057  | 11.859567 | 19.084357 |
| O  | 2.666502  | 10.499297 | 17.589842 |
| O  | 3.894019  | 11.665816 | 20.361051 |
| O  | 4.702929  | 12.428268 | 15.848310 |
| O  | 4.627767  | 9.431341  | 16.356029 |
| Ti | 6.033473  | 11.230701 | 16.367441 |
| O  | 5.722834  | 10.852998 | 18.296765 |
| O  | 4.422796  | 8.972541  | 20.707497 |
| Ti | 5.441249  | 10.558308 | 20.091174 |
| O  | 6.970121  | 11.143373 | 21.142101 |
| O  | 6.925920  | 8.800808  | 19.874859 |
| O  | 7.355846  | 9.313385  | 16.747260 |
| O  | 7.799766  | 12.032324 | 16.507831 |
| O  | 9.108524  | 10.873094 | 19.023303 |
| Ti | 8.791235  | 10.611512 | 17.186978 |
| Ti | 8.276297  | 9.993409  | 20.425095 |
| Ti | 5.669287  | 7.262513  | 20.311737 |
| O  | 5.646554  | 6.880648  | 18.493243 |
| Ti | 5.842148  | 7.786800  | 16.843779 |
| O  | -1.898089 | 10.189714 | 15.743731 |
| O  | 7.514677  | 6.942819  | 16.165901 |
| Ti | 8.487731  | 5.342571  | 16.606660 |
| O  | 8.108050  | 5.111639  | 18.500153 |
| O  | 7.035802  | 6.277082  | 21.167266 |
| Ti | 8.050944  | 4.924502  | 20.353866 |
| O  | 9.405159  | 3.324694  | 20.988520 |
| O  | 9.829741  | 3.736033  | 15.962524 |
| O  | 9.566964  | 8.787925  | 21.064108 |
| O  | 10.203441 | 9.926232  | 16.285704 |
| O  | 10.434877 | 6.058806  | 16.716396 |
| Ti | 10.946228 | 8.081926  | 16.218826 |
| O  | 10.674865 | 7.952698  | 18.277650 |
| O  | 9.978201  | 5.704932  | 20.351230 |
| Ti | 10.548357 | 7.532949  | 20.043318 |
| O  | 12.295217 | 7.391631  | 20.875999 |
| O  | 12.094038 | 5.235727  | 18.846162 |
| O  | 13.218716 | 5.634199  | 16.149025 |
| O  | 12.875754 | 8.599460  | 16.292079 |
| O  | 14.239577 | 7.507060  | 18.645864 |
| Ti | 14.082929 | 7.355948  | 16.793182 |
| O  | 15.683698 | 6.554246  | 16.279434 |
| Ti | 13.352028 | 6.354836  | 19.787550 |
| O  | 14.635214 | 5.082046  | 20.296940 |
| Ti | 15.013093 | 3.707842  | 19.069604 |
| Ti | 15.205760 | 4.642787  | 16.249027 |
| O  | 15.070976 | 2.088017  | 19.980377 |
| Ti | 13.314023 | 1.299053  | 19.800679 |
| O  | 13.337653 | 1.234273  | 17.956727 |
| O  | 15.258715 | 2.802649  | 15.469549 |

|    |           |           |           |
|----|-----------|-----------|-----------|
| Ti | 13.572235 | 1.854925  | 16.087781 |
| O  | 13.687475 | 3.719214  | 17.556813 |
| O  | 12.291033 | 2.759543  | 20.487278 |
| Ti | 10.887198 | 3.800519  | 19.829710 |
| O  | 16.286972 | 4.226701  | 17.834855 |
| O  | 10.531075 | 3.075702  | 18.145717 |
| O  | 12.154267 | 2.985990  | 15.463050 |
| Ti | 11.604217 | 4.421792  | 16.900133 |
| Ti | -2.861343 | 8.533436  | 16.380130 |
| O  | -3.085841 | 8.702395  | 18.263643 |
| O  | -4.439213 | 7.706669  | 20.653510 |
| Ti | -2.741428 | 8.387309  | 20.080368 |
| O  | -1.568742 | 7.212487  | 16.393483 |
| Ti | -0.275086 | 5.846540  | 16.726395 |
| O  | -0.271926 | 5.596655  | 18.619429 |
| O  | -1.534673 | 7.088802  | 20.695258 |
| Ti | -0.279873 | 5.675726  | 20.473855 |
| O  | 1.104307  | 4.127218  | 21.233627 |
| O  | 1.123196  | 4.109862  | 16.514518 |
| O  | 1.449210  | 6.859602  | 16.456171 |
| O  | 1.396960  | 6.621560  | 20.954097 |
| Ti | 2.797395  | 4.951048  | 20.618747 |
| O  | 2.743389  | 4.972111  | 18.765461 |
| Ti | 2.886258  | 5.141059  | 16.868249 |
| Ti | -7.781446 | 3.045773  | 16.830221 |
| Ti | -6.819674 | 3.233504  | 19.565734 |
| O  | -7.322486 | 4.869857  | 16.205563 |
| Ti | -5.674157 | 6.033802  | 16.537636 |
| O  | -6.048953 | 6.693234  | 18.258691 |
| O  | -6.405480 | 4.848046  | 20.393906 |
| Ti | -5.143817 | 6.176474  | 19.812051 |
| O  | -6.032405 | 2.690366  | 17.796640 |
| O  | -4.608256 | 7.625042  | 16.061961 |
| O  | -4.393901 | 4.677367  | 16.718836 |
| Ti | -3.273173 | 3.168435  | 16.574614 |
| O  | -8.459346 | 3.419308  | 18.539156 |
| O  | -2.149708 | 2.895660  | 18.234335 |
| O  | -3.661084 | 5.058055  | 19.645010 |
| Ti | -2.815814 | 3.352962  | 19.910360 |
| Ti | -6.049022 | 0.520738  | 16.931947 |
| O  | -7.797365 | 1.144177  | 16.520722 |
| O  | -4.527388 | 2.413852  | 19.978746 |
| O  | -4.264439 | -0.169864 | 21.322256 |
| O  | -6.050344 | -0.162158 | 18.721255 |
| Ti | -5.475533 | 0.744652  | 20.230367 |
| O  | -7.034071 | 1.726704  | 20.703475 |
| O  | -4.418399 | 1.538066  | 16.379859 |
| O  | -1.864770 | -1.829993 | 16.603841 |
| O  | -1.531792 | -1.658692 | 21.030589 |
| O  | -1.705309 | 1.528376  | 20.827492 |
| Ti | -2.523224 | -0.144991 | 20.514290 |
| O  | -2.915101 | -0.134052 | 18.694761 |

|    |           |           |           |
|----|-----------|-----------|-----------|
| O  | -1.783603 | 1.310022  | 16.388353 |
| Ti | -2.935243 | -0.312325 | 16.760539 |
| O  | -4.833803 | -1.046268 | 16.440834 |
| O  | -1.570258 | 4.283238  | 16.271183 |
| O  | -1.394641 | 4.075047  | 21.049327 |
| O  | 1.271277  | 1.191978  | 21.330562 |
| Ti | 0.123385  | 2.506421  | 20.653498 |
| O  | 0.346729  | 2.523315  | 18.840157 |
| O  | 1.061239  | 1.163826  | 16.549027 |
| Ti | -0.195239 | 2.562134  | 16.955796 |
| O  | 4.251474  | 3.890112  | 16.574013 |
| Ti | 5.572941  | 2.556815  | 16.787900 |
| O  | 5.310195  | 2.383188  | 18.691667 |
| O  | 4.018224  | 3.653172  | 21.206994 |
| Ti | 5.254900  | 2.400226  | 20.540917 |
| O  | 6.728799  | 0.796044  | 21.080826 |
| O  | 7.068403  | 0.858869  | 16.400151 |
| O  | 7.295780  | 3.635693  | 16.452111 |
| O  | 6.924466  | 3.411296  | 20.857922 |
| O  | 12.643339 | -0.234987 | 20.620313 |
| Ti | 10.903910 | -0.912731 | 20.143182 |
| O  | 11.223393 | -1.130794 | 18.320810 |
| O  | 12.990434 | -0.014776 | 15.790814 |
| Ti | 11.244149 | -0.816484 | 16.432656 |
| O  | 10.016255 | -2.446972 | 20.817952 |
| O  | 9.736015  | 0.456022  | 20.638293 |
| Ti | 8.305082  | 1.700721  | 20.420018 |
| O  | 8.207609  | 1.780936  | 18.594244 |
| O  | 10.113485 | 0.666966  | 16.344903 |
| Ti | 8.819671  | 2.026502  | 16.770228 |
| Ti | 2.505744  | 0.025975  | 16.755771 |
| O  | 2.769972  | 0.226771  | 18.637665 |
| Ti | 2.559547  | 0.089880  | 20.467945 |
| Ti | -0.244292 | -2.797787 | 16.846640 |
| O  | 1.274007  | -1.398592 | 20.313103 |
| O  | 1.137001  | -3.902677 | 21.139854 |
| O  | -0.597309 | -3.244076 | 18.664240 |
| Ti | -0.084721 | -2.687233 | 20.356159 |
| O  | 1.295403  | -1.648256 | 16.597515 |
| Ti | 5.720891  | -4.885656 | 19.712833 |
| O  | 5.635317  | -6.389043 | 18.506588 |
| Ti | 5.650983  | -5.329837 | 16.935574 |
| O  | 5.743277  | -3.778263 | 18.166224 |
| O  | 3.862245  | -4.984691 | 16.337128 |
| O  | 4.199876  | -4.525224 | 20.723992 |
| O  | 3.874653  | -1.688610 | 20.979866 |
| Ti | 2.814070  | -3.233086 | 20.421228 |
| O  | 2.635601  | -3.269801 | 18.569681 |
| O  | 4.017024  | -1.853247 | 16.371837 |
| Ti | 2.801712  | -3.464243 | 16.684682 |
| O  | 0.927848  | -4.357464 | 16.404613 |
| O  | 4.327741  | 0.909233  | 16.394152 |

|    |           |           |           |
|----|-----------|-----------|-----------|
| O  | 4.233402  | 0.813335  | 21.190627 |
| Ti | 8.368130  | -3.177387 | 20.217730 |
| O  | 8.811966  | -3.531828 | 18.445632 |
| O  | 10.176547 | -2.471151 | 16.160557 |
| Ti | 8.453596  | -3.308804 | 16.594413 |
| O  | 7.475212  | -5.063253 | 16.246727 |
| O  | 7.349151  | -4.753824 | 20.629637 |
| O  | 7.037746  | -1.956094 | 20.745357 |
| Ti | 5.588665  | -0.756388 | 20.478195 |
| O  | 5.546301  | -0.641402 | 18.638626 |
| O  | 7.228230  | -1.930215 | 16.463329 |
| Ti | 5.745588  | -0.755933 | 16.743262 |

48c-like 3-D (2,1,3)-mer

|    |           |           |           |
|----|-----------|-----------|-----------|
| Ti | -4.292904 | 6.912644  | -1.871892 |
| O  | -4.694799 | 7.246888  | -0.088365 |
| O  | -6.041412 | 6.207988  | 2.207359  |
| Ti | -4.310046 | 7.014862  | 1.759001  |
| O  | -3.324206 | 8.768734  | 2.095581  |
| O  | -3.262247 | 8.476859  | -2.295886 |
| O  | -2.970512 | 5.697167  | -2.442177 |
| Ti | -1.523410 | 4.495462  | -2.200876 |
| O  | -1.423579 | 4.387418  | -0.363466 |
| O  | -3.075538 | 5.643004  | 1.869767  |
| Ti | -1.585746 | 4.488770  | 1.535304  |
| O  | -0.137594 | 2.846220  | 1.879840  |
| O  | -0.181687 | 2.931034  | -2.926914 |
| Ti | -1.619539 | 8.590390  | -1.397288 |
| O  | -1.539927 | 10.100093 | -0.201679 |
| Ti | -1.511141 | 9.049559  | 1.375861  |
| O  | -1.619899 | 7.482809  | 0.143496  |
| O  | 0.304489  | 8.690206  | 1.863020  |
| O  | -0.094729 | 8.237803  | -2.412017 |
| O  | 0.212665  | 5.413762  | -2.693754 |
| Ti | 1.309256  | 6.945910  | -2.199838 |
| O  | 1.623367  | 7.065139  | -0.353104 |
| O  | 0.173327  | 5.572568  | 1.848160  |
| Ti | 1.347351  | 7.179319  | 1.533061  |
| O  | 3.240623  | 8.147492  | 1.813270  |
| O  | 2.945142  | 5.440461  | 1.531092  |
| O  | 2.816548  | 5.099673  | -1.974771 |
| O  | 2.922071  | 7.471391  | -3.132986 |
| O  | 4.761090  | 7.108059  | -0.726607 |
| Ti | 4.197726  | 6.311575  | -2.325799 |
| Ti | 4.323356  | 6.760143  | 1.055907  |
| Ti | 1.692972  | 3.752321  | 1.482659  |
| O  | 1.342906  | 3.452369  | -0.365610 |
| Ti | 1.504728  | 3.628644  | -2.197494 |
| O  | -5.958004 | 6.194803  | -2.441886 |
| O  | 2.768830  | 2.543137  | -3.087997 |
| Ti | 3.931157  | 1.278088  | -2.331122 |
| O  | 3.679296  | 1.255257  | -0.516049 |

|    |            |           |           |
|----|------------|-----------|-----------|
| O  | 3.131106   | 2.621584  | 1.805235  |
| Ti | 4.295539   | 1.141400  | 1.346278  |
| O  | 5.633520   | -0.538160 | 2.122011  |
| O  | 5.435350   | -0.317735 | -2.744135 |
| O  | 5.894967   | 6.180384  | 1.832227  |
| O  | 5.627009   | 5.246745  | -2.868738 |
| O  | 5.732264   | 2.243066  | -2.472174 |
| Ti | 6.626902   | 3.875649  | -1.965738 |
| O  | 6.495155   | 4.104670  | -0.121728 |
| O  | 5.986174   | 2.363363  | 1.892612  |
| Ti | 6.584825   | 4.336186  | 1.819970  |
| O  | 8.580191   | 4.760772  | 1.883561  |
| O  | 8.756086   | 1.960624  | 1.995645  |
| O  | 8.245935   | 1.764594  | -1.460371 |
| O  | 8.422766   | 4.208669  | -2.587424 |
| O  | 10.211363  | 3.894885  | -0.169291 |
| Ti | 9.593311   | 3.047449  | -1.686456 |
| O  | 11.024503  | 1.918303  | -2.256315 |
| Ti | 10.065320  | 3.346482  | 1.646068  |
| O  | 11.743289  | 2.461291  | 1.820147  |
| Ti | 11.859252  | 0.601401  | 1.532234  |
| Ti | 11.263848  | 0.362315  | -1.227262 |
| O  | 11.518068  | -1.218886 | 2.266756  |
| Ti | 9.797295   | -2.239414 | 1.839467  |
| O  | 10.134623  | -2.836180 | 0.079378  |
| O  | 10.859967  | -1.199305 | -2.171115 |
| Ti | 9.408960   | -2.295703 | -1.554033 |
| O  | 10.230559  | 0.490442  | 0.360837  |
| O  | 8.421150   | -0.979939 | 1.745337  |
| Ti | 7.362584   | 0.590032  | 1.722928  |
| O  | 12.819417  | 0.362510  | -0.103510 |
| O  | 6.145832   | 0.683675  | 0.095587  |
| O  | 8.004704   | -1.054481 | -1.559207 |
| Ti | 6.834314   | 0.444747  | -1.622113 |
| Ti | -6.849624  | 4.662110  | -1.764446 |
| O  | -7.148587  | 4.882660  | 0.059206  |
| O  | -8.825541  | 3.708617  | 2.611154  |
| Ti | -7.104238  | 4.539769  | 1.944575  |
| O  | -5.682902  | 3.299128  | -2.285079 |
| Ti | -4.246807  | 2.053485  | -2.114993 |
| O  | -4.093331  | 1.972413  | -0.293733 |
| O  | -5.949046  | 3.072900  | 1.961511  |
| Ti | -4.661705  | 1.707043  | 1.538414  |
| O  | -3.116705  | 0.104207  | 1.828714  |
| O  | -2.863663  | 0.348720  | -2.589261 |
| O  | -2.676633  | 2.956632  | -2.793504 |
| O  | -2.897535  | 2.878330  | 1.888536  |
| Ti | -1.395927  | 1.196362  | 1.499747  |
| O  | -1.209750  | 1.361099  | -0.410224 |
| Ti | -1.194633  | 1.344719  | -2.261359 |
| Ti | -10.901080 | 0.003498  | -0.669926 |
| Ti | -11.032534 | -0.951383 | 2.142372  |

|    |            |           |           |
|----|------------|-----------|-----------|
| O  | -10.990344 | 1.630592  | -1.567785 |
| Ti | -9.234707  | 2.427662  | -1.411226 |
| O  | -9.215530  | 2.473750  | 0.432488  |
| O  | -11.064962 | 0.885381  | 2.941463  |
| Ti | -9.400107  | 1.840533  | 2.302181  |
| O  | -9.542997  | -0.019870 | 0.807370  |
| O  | -8.592457  | 3.977232  | -2.224632 |
| O  | -8.221848  | 0.976829  | -2.138266 |
| Ti | -6.805761  | -0.067427 | -1.511960 |
| O  | -12.151297 | -0.523272 | 0.585883  |
| O  | -6.420175  | 0.642523  | 0.167852  |
| O  | -7.965717  | 0.705876  | 2.880506  |
| Ti | -7.436689  | -0.717627 | 1.426281  |
| Ti | -9.245248  | -2.637090 | -1.446090 |
| O  | -10.543665 | -1.364307 | -1.914245 |
| O  | -9.045956  | -1.945494 | 2.182098  |
| O  | -8.694014  | -4.902472 | 2.011498  |
| O  | -10.108416 | -3.808125 | -0.302913 |
| Ti | -9.920691  | -3.666106 | 1.547071  |
| O  | -11.507431 | -2.867955 | 2.102470  |
| O  | -7.971991  | -1.530656 | -0.516744 |
| O  | -5.462916  | -5.037950 | -2.821656 |
| O  | -6.070266  | -6.233248 | 1.960032  |
| O  | -6.253778  | -2.344798 | 1.590800  |
| Ti | -6.764365  | -4.377062 | 2.060358  |
| O  | -6.504250  | -4.231202 | -0.001725 |
| O  | -5.882777  | -1.961098 | -2.068783 |
| Ti | -6.431240  | -3.798245 | -1.766995 |
| O  | -8.198570  | -3.660175 | -2.559357 |
| O  | -5.340497  | 0.428702  | -2.683197 |
| O  | -5.650098  | -0.013012 | 2.335490  |
| O  | -3.349344  | -3.223839 | 2.116354  |
| Ti | -4.299663  | -1.613889 | 1.683973  |
| O  | -3.980644  | -1.364284 | -0.219620 |
| O  | -2.939745  | -2.514007 | -2.891855 |
| Ti | -3.967032  | -1.174823 | -2.071039 |
| O  | 0.037638   | 0.081090  | -2.904055 |
| Ti | 1.272958   | -1.203534 | -2.310042 |
| O  | 1.335015   | -1.277141 | -0.457678 |
| O  | -0.071092  | -0.129789 | 1.739888  |
| Ti | 1.236976   | -1.440170 | 1.444893  |
| O  | 2.694117   | -3.186782 | 1.870928  |
| O  | 2.703303   | -2.864259 | -2.676905 |
| O  | 2.951569   | -0.357789 | -2.886357 |
| O  | 2.984547   | -0.398468 | 1.818158  |
| O  | 8.833127   | -3.890833 | 2.303453  |
| Ti | 7.085717   | -4.735629 | 1.908495  |
| O  | 7.272426   | -4.865117 | 0.003711  |
| O  | 8.619090   | -3.811178 | -2.360478 |
| Ti | 6.939304   | -4.524222 | -1.794968 |
| O  | 6.128186   | -6.393373 | 2.380069  |
| O  | 5.761925   | -3.429040 | 1.885929  |

|    |           |           |           |
|----|-----------|-----------|-----------|
| Ti | 4.387429  | -2.143274 | 1.624601  |
| O  | 4.333517  | -1.873862 | -0.277137 |
| O  | 5.693400  | -3.240038 | -2.343709 |
| Ti | 4.346169  | -1.907218 | -2.133043 |
| Ti | -1.568907 | -3.512753 | -2.056319 |
| O  | -1.531885 | -3.166885 | -0.233150 |
| Ti | -1.703145 | -4.082748 | 1.415128  |
| Ti | -4.159739 | -6.251317 | -2.217203 |
| O  | -3.232641 | -5.595571 | 1.502574  |
| O  | -3.685978 | -8.316923 | 1.681324  |
| O  | -4.983991 | -7.137557 | -0.817080 |
| Ti | -4.664953 | -6.883327 | 1.024043  |
| O  | -2.811364 | -5.057974 | -1.667414 |
| Ti | 1.186329  | -8.356263 | 1.852503  |
| O  | 1.451881  | -9.460552 | 0.309476  |
| Ti | 1.656979  | -8.097974 | -0.957050 |
| O  | 1.497966  | -6.787604 | 0.571390  |
| O  | 0.263812  | -7.905512 | -2.144876 |
| O  | -0.632160 | -8.822621 | 2.137113  |
| O  | -0.489047 | -5.737885 | 1.836918  |
| Ti | -1.920063 | -7.507751 | 1.811154  |
| O  | -1.629786 | -7.095431 | -0.117313 |
| O  | -0.294464 | -5.221379 | -2.488110 |
| Ti | -1.312242 | -6.812637 | -1.902534 |
| O  | -2.842401 | -7.381040 | -2.959649 |
| O  | 0.104839  | -2.768001 | -2.769902 |
| O  | 0.036970  | -3.100497 | 1.825519  |
| Ti | 4.269311  | -6.822682 | 2.121792  |
| O  | 4.340609  | -6.525292 | 0.249358  |
| O  | 5.952901  | -6.098806 | -2.295326 |
| Ti | 4.261106  | -6.561486 | -1.643390 |
| O  | 3.347757  | -8.232210 | -1.754206 |
| O  | 3.008385  | -8.357429 | 2.562770  |
| O  | 3.036395  | -5.482345 | 2.749555  |
| Ti | 1.396758  | -4.870510 | 1.617083  |
| O  | 1.441162  | -4.337278 | -0.265602 |
| O  | 2.899390  | -5.560906 | -2.443339 |
| Ti | 1.490658  | -4.317291 | -2.088998 |
| Ti | -2.794220 | 8.410537  | 4.159057  |
| O  | -3.244458 | 9.000042  | 5.866518  |
| O  | -4.728691 | 7.696498  | 8.242704  |
| Ti | -3.019490 | 8.494560  | 7.699237  |
| O  | -1.918119 | 10.149905 | 8.030817  |
| O  | -1.426335 | 9.836703  | 3.467631  |
| O  | -1.438009 | 7.116770  | 3.994946  |
| Ti | 0.015727  | 5.849221  | 4.144390  |
| O  | 0.296917  | 5.817407  | 5.969100  |
| O  | -1.824280 | 7.082619  | 7.726520  |
| Ti | -0.149223 | 6.119928  | 7.802701  |
| O  | 1.256616  | 4.331935  | 8.152288  |
| O  | 1.455906  | 4.168312  | 3.645167  |
| Ti | 0.108333  | 9.965272  | 4.622281  |



|    |           |           |          |
|----|-----------|-----------|----------|
| O  | -0.008547 | 11.440818 | 5.875780 |
| Ti | -0.050402 | 10.345943 | 7.406664 |
| O  | -0.012338 | 8.830284  | 6.175029 |
| O  | 1.804649  | 10.067604 | 8.143004 |
| O  | 1.818996  | 9.942850  | 3.921900 |
| O  | 1.801884  | 6.857300  | 3.632386 |
| Ti | 3.190799  | 8.592953  | 3.874974 |
| O  | 3.104448  | 8.423412  | 5.829708 |
| O  | 1.688356  | 7.076153  | 8.131312 |
| Ti | 3.027522  | 8.577554  | 7.655279 |
| O  | 4.877481  | 9.363772  | 8.077300 |
| O  | 4.413832  | 6.729875  | 7.852139 |
| O  | 4.472320  | 6.719752  | 4.261005 |
| O  | 5.028075  | 9.248477  | 3.553831 |
| O  | 6.493779  | 8.369111  | 5.996011 |
| Ti | 6.030062  | 7.845293  | 4.266589 |
| Ti | 6.097312  | 7.726758  | 7.714687 |
| Ti | 3.027942  | 5.204212  | 7.674698 |
| O  | 3.057055  | 4.852914  | 5.811972 |
| Ti | 3.239072  | 5.172667  | 3.978665 |
| O  | -4.520427 | 7.486754  | 3.903441 |
| O  | 4.827377  | 4.216247  | 3.319776 |
| Ti | 5.614162  | 2.545092  | 4.082471 |
| O  | 5.589550  | 2.597505  | 5.927164 |
| O  | 4.321489  | 3.890970  | 8.138449 |
| Ti | 5.588254  | 2.552390  | 7.832221 |
| O  | 7.072344  | 0.793436  | 8.222757 |
| O  | 7.099919  | 0.885578  | 3.867670 |
| O  | 7.573548  | 6.494016  | 7.698044 |
| O  | 7.651839  | 6.883962  | 3.892861 |
| O  | 7.382510  | 3.740173  | 3.847368 |
| Ti | 8.755120  | 5.410053  | 3.841156 |
| O  | 9.392007  | 4.996090  | 5.752314 |
| O  | 7.400935  | 3.589727  | 8.075192 |
| Ti | 8.760899  | 5.049164  | 7.602137 |
| O  | 10.551844 | 5.855173  | 8.255585 |
| O  | 10.234045 | 3.280523  | 8.263831 |
| O  | 10.191187 | 3.451576  | 3.811534 |
| O  | 10.616644 | 6.114482  | 3.572407 |
| O  | 12.271845 | 5.336338  | 6.337984 |
| Ti | 11.390408 | 4.894590  | 4.724211 |
| O  | 12.887175 | 3.700647  | 4.234051 |
| Ti | 11.904191 | 4.348887  | 7.897729 |
| O  | 13.637772 | 3.563913  | 8.476862 |
| Ti | 13.559286 | 1.708458  | 7.763190 |
| Ti | 12.906509 | 2.027648  | 4.955775 |
| O  | 12.854513 | -0.016985 | 8.228560 |
| Ti | 11.165756 | -1.124902 | 7.842074 |
| O  | 11.788896 | -1.319587 | 6.040385 |
| O  | 12.515916 | 0.642099  | 3.719441 |
| Ti | 11.168616 | -0.862005 | 4.336943 |
| O  | 11.982293 | 2.412329  | 6.692668 |

|    |            |           |          |
|----|------------|-----------|----------|
| O  | 9.871307   | 0.198571  | 7.789276 |
| Ti | 8.824527   | 1.785437  | 7.907862 |
| O  | 14.401450  | 1.527709  | 6.091114 |
| O  | 8.612879   | 2.361389  | 6.103824 |
| O  | 9.882824   | 0.468789  | 4.366197 |
| Ti | 8.761524   | 2.043394  | 4.286326 |
| Ti | -5.698334  | 5.977768  | 4.383914 |
| O  | -6.159829  | 6.411122  | 6.161042 |
| O  | -7.491048  | 5.150243  | 8.549437 |
| Ti | -5.777179  | 6.018308  | 7.958286 |
| O  | -4.487919  | 4.566460  | 4.253826 |
| Ti | -3.116080  | 3.240445  | 4.083584 |
| O  | -2.918726  | 3.059005  | 5.957510 |
| O  | -4.520340  | 4.648995  | 7.977455 |
| Ti | -3.134189  | 3.325649  | 7.783511 |
| O  | -1.687767  | 1.630236  | 8.202085 |
| O  | -1.620300  | 1.546700  | 3.739586 |
| O  | -1.349833  | 4.319815  | 3.757855 |
| O  | -1.457872  | 4.457219  | 8.139674 |
| Ti | 0.057521   | 2.682534  | 7.808974 |
| O  | -0.044346  | 2.856268  | 5.934421 |
| Ti | 0.114293   | 2.577221  | 4.092671 |
| Ti | -10.464071 | 0.567188  | 5.107052 |
| Ti | -9.949236  | 0.225502  | 8.064659 |
| O  | -9.729371  | 2.221023  | 4.521298 |
| Ti | -8.344612  | 3.670816  | 4.759911 |
| O  | -9.023457  | 4.052261  | 6.478132 |
| O  | -9.844145  | 2.120192  | 8.781916 |
| Ti | -8.448302  | 3.439765  | 8.165226 |
| O  | -9.053016  | -0.425424 | 6.128665 |
| O  | -7.524900  | 5.288431  | 3.993908 |
| O  | -6.888070  | 2.536924  | 4.828949 |
| Ti | -6.213336  | 0.820332  | 4.260275 |
| O  | -11.290901 | 0.834709  | 6.728860 |
| O  | -5.692517  | 0.343192  | 6.059358 |
| O  | -7.093010  | 2.214846  | 8.043437 |
| Ti | -6.067383  | 0.539027  | 7.842010 |
| Ti | -8.814345  | -2.041283 | 4.461922 |
| O  | -10.660137 | -1.225440 | 4.166043 |
| O  | -7.836361  | -0.449776 | 8.274529 |
| O  | -7.450401  | -3.300343 | 8.260654 |
| O  | -9.192897  | -3.175867 | 5.895037 |
| Ti | -8.752249  | -2.271594 | 7.500250 |
| O  | -10.340830 | -1.644683 | 8.330092 |
| O  | -7.149588  | -1.019143 | 4.573096 |
| O  | -5.218748  | -4.309844 | 3.553654 |
| O  | -4.709900  | -4.829511 | 8.440088 |
| O  | -4.692726  | -1.069948 | 8.286408 |
| Ti | -5.496361  | -3.029658 | 8.451312 |
| O  | -5.469987  | -2.874161 | 6.429216 |
| O  | -4.314229  | -1.531425 | 3.915673 |
| Ti | -5.756850  | -2.616206 | 4.654747 |

|    |           |           |          |
|----|-----------|-----------|----------|
| O  | -7.508972 | -3.379730 | 3.761578 |
| O  | -4.331030 | 1.560846  | 3.772932 |
| O  | -4.380853 | 1.708346  | 8.291803 |
| O  | -1.697326 | -1.417409 | 8.263105 |
| Ti | -2.922194 | -0.028861 | 7.913058 |
| O  | -2.864673 | 0.048872  | 6.034128 |
| O  | -1.461301 | -1.284610 | 3.730135 |
| Ti | -2.867088 | -0.073140 | 4.164540 |
| O  | 1.407415  | 1.226633  | 3.901759 |
| Ti | 2.705624  | -0.129675 | 4.079141 |
| O  | 2.806610  | -0.295599 | 5.959636 |
| O  | 1.356594  | 1.312833  | 7.949356 |
| Ti | 2.585184  | -0.103349 | 7.803518 |
| O  | 4.036824  | -1.867174 | 8.281135 |
| O  | 4.161417  | -1.894897 | 3.839525 |
| O  | 4.382500  | 1.002131  | 3.755669 |
| O  | 4.349235  | 0.923525  | 8.208007 |
| O  | 10.097685 | -2.706754 | 8.356748 |
| Ti | 8.316079  | -3.593022 | 8.031616 |
| O  | 8.845379  | -3.953676 | 6.257492 |
| O  | 10.182470 | -2.519677 | 3.980435 |
| Ti | 8.505745  | -3.494142 | 4.464228 |
| O  | 7.274151  | -5.172932 | 8.634251 |
| O  | 7.021551  | -2.256568 | 8.043184 |
| Ti | 5.766270  | -0.818469 | 7.907347 |
| O  | 5.669293  | -0.433646 | 6.071130 |
| O  | 7.253184  | -2.114683 | 4.374401 |
| Ti | 5.848622  | -0.826463 | 4.256349 |
| Ti | -0.227050 | -2.634730 | 4.063347 |
| O  | -0.344331 | -2.769326 | 5.948765 |
| Ti | -0.397480 | -2.723656 | 7.790226 |
| Ti | -3.419576 | -5.019140 | 3.699023 |
| O  | -1.905236 | -4.169101 | 8.048908 |
| O  | -2.292306 | -6.867867 | 8.003098 |
| O  | -3.658683 | -5.357862 | 5.567149 |
| Ti | -3.324024 | -5.438642 | 7.389955 |
| O  | -1.629961 | -4.152394 | 3.754112 |
| Ti | 2.559014  | -7.461277 | 7.412408 |
| O  | 2.530496  | -8.792920 | 5.993229 |
| Ti | 2.727751  | -7.529703 | 4.632538 |
| O  | 2.623926  | -6.153803 | 5.972328 |
| O  | 0.903050  | -7.388227 | 3.770426 |
| O  | 0.919605  | -7.379679 | 8.302056 |
| O  | 0.912636  | -4.416990 | 8.315431 |
| Ti | -0.482154 | -6.104543 | 8.108849 |
| O  | -0.453897 | -5.872391 | 6.123957 |
| O  | 1.026175  | -4.497701 | 3.808543 |
| Ti | -0.371683 | -5.928296 | 4.298254 |
| O  | -2.175417 | -6.708720 | 3.684682 |
| O  | 1.546671  | -1.779239 | 3.700747 |
| O  | 1.312446  | -1.694871 | 8.201592 |
| Ti | 5.431753  | -6.046080 | 8.222228 |

|    |           |           |           |
|----|-----------|-----------|-----------|
| O  | 6.166155  | -6.323846 | 6.469670  |
| O  | 7.562858  | -5.169174 | 4.037270  |
| Ti | 5.843857  | -5.872810 | 4.699887  |
| O  | 4.658104  | -7.405180 | 4.204324  |
| O  | 4.189218  | -7.541408 | 8.258662  |
| O  | 4.218455  | -4.615270 | 8.185053  |
| Ti | 2.705793  | -3.473607 | 7.849458  |
| O  | 2.534031  | -3.299088 | 6.008019  |
| O  | 4.722534  | -4.419564 | 4.546768  |
| Ti | 2.958856  | -3.630834 | 4.156433  |
| Ti | -1.437248 | 9.770238  | 10.120351 |
| O  | -1.668985 | 10.195872 | 11.966991 |
| O  | -3.027154 | 8.748035  | 14.219469 |
| Ti | -1.412554 | 9.747026  | 13.791207 |
| O  | -0.125869 | 11.306272 | 14.150070 |
| O  | -0.107755 | 11.179547 | 9.406543  |
| O  | -0.251611 | 8.361018  | 9.863005  |
| Ti | 1.466017  | 7.456490  | 10.371967 |
| O  | 1.522621  | 6.715449  | 12.138003 |
| O  | 0.197678  | 8.686386  | 13.724118 |
| Ti | 1.335292  | 7.072160  | 13.956967 |
| O  | 2.711691  | 5.344591  | 14.405906 |
| O  | 2.834704  | 5.664491  | 9.946104  |
| Ti | 1.711883  | 10.956272 | 10.171624 |
| O  | 1.399963  | 12.007356 | 11.713481 |
| Ti | 1.380776  | 10.641859 | 13.033529 |
| O  | 1.558842  | 9.386842  | 11.417971 |
| O  | 2.988823  | 10.743320 | 13.942503 |
| O  | 3.548310  | 11.364883 | 9.871324  |
| O  | 3.342166  | 8.320357  | 9.902411  |
| Ti | 4.811938  | 9.991600  | 10.049444 |
| O  | 4.821722  | 9.554410  | 11.976604 |
| O  | 3.125612  | 8.091330  | 14.320919 |
| Ti | 4.537293  | 9.591148  | 13.819588 |
| O  | 6.301995  | 10.475481 | 14.398961 |
| O  | 5.926854  | 7.831692  | 14.278615 |
| O  | 6.188722  | 7.935858  | 9.888188  |
| O  | 6.683604  | 10.631148 | 10.043996 |
| O  | 7.979668  | 9.179207  | 12.430803 |
| Ti | 7.590112  | 9.123577  | 10.617152 |
| Ti | 7.605518  | 8.858762  | 14.260440 |
| Ti | 4.481327  | 6.324763  | 14.044838 |
| O  | 4.527239  | 6.617441  | 12.173358 |
| Ti | 4.591753  | 6.596678  | 10.315688 |
| O  | -3.242505 | 9.009810  | 9.875094  |
| O  | 5.949256  | 5.299089  | 10.002315 |
| Ti | 7.171490  | 3.924777  | 10.296703 |
| O  | 7.206874  | 3.670486  | 12.156934 |
| O  | 5.579286  | 4.840410  | 14.280351 |
| Ti | 6.961392  | 3.580421  | 14.019888 |
| O  | 8.460395  | 1.915892  | 14.415694 |
| O  | 8.610114  | 2.153430  | 10.044053 |

|    |           |           |           |
|----|-----------|-----------|-----------|
| O  | 9.248515  | 7.895079  | 14.549992 |
| O  | 9.025034  | 8.336974  | 9.701730  |
| O  | 8.933168  | 4.972621  | 9.929401  |
| Ti | 10.059587 | 6.784560  | 10.016996 |
| O  | 9.970693  | 6.500888  | 11.950671 |
| O  | 8.665065  | 4.783203  | 14.308007 |
| Ti | 10.025612 | 6.185758  | 13.786807 |
| O  | 11.806578 | 7.047848  | 14.339650 |
| O  | 11.515370 | 4.511338  | 14.312718 |
| O  | 12.031487 | 4.431469  | 10.226950 |
| O  | 11.955614 | 7.320347  | 9.950845  |
| O  | 13.504824 | 6.731464  | 12.441608 |
| Ti | 13.104305 | 6.141912  | 10.749918 |
| O  | 14.669075 | 5.242329  | 10.202563 |
| Ti | 13.180213 | 5.608305  | 13.947910 |
| O  | 15.030538 | 4.883564  | 14.289771 |
| Ti | 14.836098 | 3.041456  | 13.524206 |
| Ti | 14.142115 | 3.441492  | 10.653742 |
| O  | 14.177352 | 1.327060  | 14.102688 |
| Ti | 12.575419 | 0.112378  | 13.827879 |
| O  | 13.163415 | -0.298897 | 12.070084 |
| O  | 14.040206 | 1.582419  | 9.852532  |
| Ti | 12.578923 | 0.267500  | 10.393330 |
| O  | 13.293707 | 3.882937  | 12.524024 |
| O  | 11.233162 | 1.407127  | 13.766651 |
| Ti | 10.166315 | 2.948767  | 14.054575 |
| O  | 15.595804 | 2.828197  | 11.854043 |
| O  | 10.050253 | 3.695010  | 12.284111 |
| O  | 11.304298 | 1.605124  | 10.486867 |
| Ti | 10.307127 | 3.286790  | 10.503056 |
| Ti | -4.308418 | 7.429170  | 10.412104 |
| O  | -4.723986 | 7.786077  | 12.224275 |
| O  | -6.064876 | 6.430348  | 14.522297 |
| Ti | -4.305120 | 7.228649  | 13.971038 |
| O  | -3.014083 | 6.093503  | 10.370052 |
| Ti | -1.639716 | 4.768167  | 10.313437 |
| O  | -1.527687 | 4.358227  | 12.158522 |
| O  | -3.143021 | 5.789667  | 14.056168 |
| Ti | -1.741334 | 4.462239  | 13.992193 |
| O  | -0.347222 | 2.762764  | 14.439001 |
| O  | -0.193468 | 3.037605  | 10.000069 |
| O  | 0.076219  | 5.824889  | 9.973046  |
| O  | -0.093994 | 5.644564  | 14.378118 |
| Ti | 1.480719  | 3.697979  | 14.090681 |
| O  | 1.289692  | 3.937775  | 12.248576 |
| Ti | 1.543858  | 4.114598  | 10.395647 |
| Ti | -9.303354 | 1.991389  | 10.933045 |
| Ti | -8.604834 | 1.585282  | 13.801420 |
| O  | -8.644755 | 3.706322  | 10.354564 |
| Ti | -7.038054 | 4.916572  | 10.628962 |
| O  | -7.626897 | 5.326475  | 12.387033 |
| O  | -8.501063 | 3.444293  | 14.601858 |

|    |            |           |           |
|----|------------|-----------|-----------|
| Ti | -7.039212  | 4.761079  | 14.062311 |
| O  | -7.757804  | 1.152571  | 11.929447 |
| O  | -6.058080  | 6.537401  | 10.097425 |
| O  | -5.695597  | 3.623474  | 10.692200 |
| Ti | -4.629905  | 2.080271  | 10.404179 |
| O  | -10.061232 | 2.197855  | 12.604935 |
| O  | -4.510300  | 1.336994  | 12.174755 |
| O  | -5.769048  | 3.418460  | 13.975741 |
| Ti | -4.769561  | 1.738642  | 13.956577 |
| Ti | -7.647115  | -0.574288 | 10.509559 |
| O  | -9.497337  | 0.149193  | 10.165797 |
| O  | -6.492436  | 0.589921  | 14.228080 |
| O  | -6.424795  | -2.297030 | 14.511146 |
| O  | -7.970761  | -1.698940 | 12.016000 |
| Ti | -7.569717  | -1.116178 | 13.710440 |
| O  | -9.134002  | -0.213829 | 14.253875 |
| O  | -5.979209  | 0.518831  | 10.145653 |
| O  | -3.716442  | -2.868648 | 9.910821  |
| O  | -3.497611  | -3.309519 | 14.754648 |
| O  | -3.394994  | 0.053457  | 14.528136 |
| Ti | -4.530425  | -1.756545 | 14.440037 |
| O  | -4.442472  | -1.470662 | 12.507261 |
| O  | -3.131064  | 0.243852  | 10.152496 |
| Ti | -4.493753  | -1.159068 | 10.670067 |
| O  | -6.276892  | -2.018074 | 10.118253 |
| O  | -2.923404  | 3.112236  | 10.042750 |
| O  | -3.071962  | 2.874904  | 14.414063 |
| O  | -0.405937  | -0.264621 | 14.457852 |
| Ti | -1.634001  | 1.105533  | 14.162677 |
| O  | -1.670434  | 1.357026  | 12.302729 |
| O  | -0.039729  | 0.190407  | 10.180673 |
| Ti | -1.426875  | 1.446284  | 10.439104 |
| O  | 2.847603   | 2.734202  | 10.189311 |
| Ti | 4.060038   | 1.332514  | 10.368168 |
| O  | 4.249653   | 1.091125  | 12.210243 |
| O  | 2.691237   | 2.294302  | 14.271214 |
| Ti | 3.992789   | 0.911757  | 14.062284 |
| O  | 5.460165   | -0.796294 | 14.487694 |
| O  | 5.632642   | -0.614227 | 10.082291 |
| O  | 5.886982   | 2.267524  | 10.020701 |
| O  | 5.728738   | 1.990222  | 14.459187 |
| O  | 11.596826  | -1.507509 | 14.363348 |
| Ti | 9.847080   | -2.400143 | 14.050988 |
| O  | 10.263366  | -2.756151 | 12.238127 |
| O  | 11.606616  | -1.403322 | 9.934356  |
| Ti | 9.846899   | -2.199707 | 10.490828 |
| O  | 8.780395   | -3.980074 | 14.588396 |
| O  | 8.549583   | -1.064088 | 14.091617 |
| Ti | 7.176674   | 0.259888  | 14.147463 |
| O  | 7.064810   | 0.667043  | 12.301535 |
| O  | 8.683567   | -0.761628 | 10.406036 |
| Ti | 7.281519   | 0.565294  | 10.467912 |

|    |           |           |           |
|----|-----------|-----------|-----------|
| Ti | 1.058804  | -1.292792 | 10.417722 |
| O  | 1.008413  | -1.590608 | 12.288587 |
| Ti | 0.942763  | -1.570168 | 14.146787 |
| Ti | -2.067353 | -3.823234 | 10.200742 |
| O  | -0.651920 | -2.907024 | 14.579905 |
| O  | -1.150409 | -5.598672 | 14.418962 |
| O  | -2.439593 | -4.139187 | 12.031737 |
| Ti | -2.054762 | -4.089344 | 13.846571 |
| O  | -0.387889 | -2.797982 | 10.184076 |
| Ti | 3.824319  | -5.927917 | 14.292216 |
| O  | 4.138375  | -6.977873 | 12.749841 |
| Ti | 4.159262  | -5.611541 | 11.430530 |
| O  | 3.980319  | -4.357428 | 13.046813 |
| O  | 2.551181  | -5.709049 | 10.522976 |
| O  | 1.987575  | -6.338017 | 14.589247 |
| O  | 2.193439  | -3.293716 | 14.562016 |
| Ti | 0.722958  | -4.964927 | 14.413015 |
| O  | 0.715443  | -4.525571 | 12.487320 |
| O  | 2.412812  | -3.059785 | 10.141314 |
| Ti | 1.000605  | -4.558786 | 10.643890 |
| O  | -0.763531 | -5.441552 | 10.064690 |
| O  | 2.828225  | -0.313350 | 10.056166 |
| O  | 2.701586  | -0.637792 | 14.514596 |
| Ti | 6.973497  | -4.737838 | 14.344508 |
| O  | 7.204508  | -5.159513 | 12.497116 |
| O  | 8.569155  | -3.718376 | 10.242012 |
| Ti | 6.952835  | -4.713862 | 10.671416 |
| O  | 5.667212  | -6.273653 | 10.313497 |
| O  | 5.645498  | -6.147604 | 15.056188 |
| O  | 5.787821  | -3.327966 | 14.606960 |
| Ti | 4.069591  | -2.428498 | 14.091382 |
| O  | 4.011877  | -1.687214 | 12.324890 |
| O  | 5.342458  | -3.653423 | 10.737800 |
| Ti | 4.203104  | -2.041686 | 10.505564 |
| Ti | 0.109354  | 11.078243 | 16.240643 |
| O  | -0.625525 | 11.358661 | 17.993128 |
| O  | -2.022728 | 10.207929 | 20.425601 |
| Ti | -0.302920 | 10.911003 | 19.763091 |
| O  | 0.881684  | 12.443035 | 20.261318 |
| O  | 1.351948  | 12.573351 | 16.207485 |
| O  | 1.320842  | 9.646379  | 16.279442 |
| Ti | 2.834029  | 8.503925  | 16.612146 |
| O  | 3.005108  | 8.332663  | 18.454164 |
| O  | 0.817203  | 9.456886  | 19.918259 |
| Ti | 2.582480  | 8.669673  | 20.305637 |
| O  | 3.994660  | 6.817107  | 20.761912 |
| O  | 4.226802  | 6.726102  | 16.260129 |
| Ti | 2.982036  | 12.495542 | 17.053906 |
| O  | 3.010670  | 13.828182 | 18.472038 |
| Ti | 2.812191  | 12.565852 | 19.833246 |
| O  | 2.916607  | 11.188623 | 18.495254 |
| O  | 4.637469  | 12.426905 | 20.695305 |

|    |           |           |           |
|----|-----------|-----------|-----------|
| O  | 4.620348  | 12.413167 | 16.163112 |
| O  | 4.626687  | 9.449147  | 16.146832 |
| Ti | 6.021041  | 11.136879 | 16.354463 |
| O  | 5.994200  | 10.909194 | 18.339862 |
| O  | 4.513379  | 9.535001  | 20.654703 |
| Ti | 5.911435  | 10.966151 | 20.165346 |
| O  | 7.714695  | 11.746894 | 20.777901 |
| O  | 7.171538  | 9.189079  | 20.706927 |
| O  | 7.444600  | 9.202131  | 16.413957 |
| O  | 7.831337  | 11.901875 | 16.456800 |
| O  | 9.200365  | 10.397233 | 18.892931 |
| Ti | 8.863255  | 10.472702 | 17.070330 |
| Ti | 8.959203  | 10.057572 | 20.760127 |
| Ti | 5.768866  | 7.672007  | 20.398312 |
| O  | 5.882939  | 7.807865  | 18.513325 |
| Ti | 5.937313  | 7.755928  | 16.671954 |
| O  | -1.733584 | 10.205344 | 15.828326 |
| O  | 7.233150  | 6.444014  | 16.203708 |
| Ti | 8.456657  | 5.054434  | 16.549176 |
| O  | 8.399392  | 4.975086  | 18.427975 |
| O  | 6.998194  | 6.316917  | 20.728469 |
| Ti | 8.401449  | 5.100534  | 20.297687 |
| O  | 9.866307  | 3.466548  | 20.687704 |
| O  | 9.914604  | 3.319537  | 16.167548 |
| O  | 10.754168 | 9.339143  | 20.902495 |
| O  | 10.244372 | 9.860317  | 16.017049 |
| O  | 10.225560 | 6.097009  | 16.173404 |
| Ti | 11.026613 | 8.057779  | 16.007775 |
| O  | 10.999177 | 7.903658  | 18.029134 |
| O  | 9.848459  | 6.559135  | 20.545050 |
| Ti | 11.288971 | 7.643481  | 19.802774 |
| O  | 13.041240 | 8.404791  | 20.698072 |
| O  | 12.682267 | 6.047307  | 19.882532 |
| O  | 13.369728 | 5.478072  | 16.183865 |
| O  | 12.981863 | 8.326789  | 16.197556 |
| O  | 14.725529 | 8.205775  | 18.562662 |
| Ti | 14.284651 | 7.300798  | 16.958588 |
| O  | 15.872693 | 6.675419  | 16.126446 |
| Ti | 14.347570 | 7.069642  | 19.994678 |
| O  | 16.194185 | 6.255580  | 20.289802 |
| Ti | 15.998995 | 4.462707  | 19.349957 |
| Ti | 15.482784 | 4.805818  | 16.391585 |
| O  | 15.265522 | 2.808247  | 19.936841 |
| Ti | 13.880392 | 1.358808  | 19.698579 |
| O  | 14.559467 | 0.979492  | 17.979539 |
| O  | 15.378509 | 2.912055  | 15.674064 |
| Ti | 13.984040 | 1.590922  | 16.292465 |
| O  | 14.586322 | 5.454338  | 18.329136 |
| O  | 12.422992 | 2.492021  | 19.630698 |
| Ti | 11.747150 | 4.207930  | 20.200062 |
| O  | 16.825764 | 4.197627  | 17.727758 |
| O  | 11.226104 | 4.683415  | 18.399970 |



|    |           |           |           |
|----|-----------|-----------|-----------|
| O  | 12.626815 | 2.814671  | 16.414223 |
| Ti | 11.601568 | 4.489870  | 16.617166 |
| Ti | -2.775963 | 8.624292  | 16.428606 |
| O  | -3.305070 | 8.990535  | 18.201916 |
| O  | -4.640845 | 7.557294  | 20.478797 |
| Ti | -2.963568 | 8.533083  | 19.994944 |
| O  | -1.483164 | 7.286894  | 16.418826 |
| Ti | -0.226495 | 5.848700  | 16.553201 |
| O  | -0.126400 | 5.468201  | 18.390282 |
| O  | -1.710210 | 7.154009  | 20.084985 |
| Ti | -0.306102 | 5.865569  | 20.204759 |
| O  | 1.163828  | 4.035586  | 20.707707 |
| O  | 1.190867  | 4.106760  | 16.251356 |
| O  | 1.502126  | 6.898102  | 16.180448 |
| O  | 1.381525  | 6.932804  | 20.621809 |
| Ti | 2.839947  | 5.167301  | 20.381752 |
| O  | 2.737639  | 5.330159  | 18.501570 |
| Ti | 2.955410  | 5.133074  | 16.657408 |
| Ti | -8.014401 | 3.319639  | 16.689208 |
| Ti | -7.359513 | 3.005420  | 19.498810 |
| O  | -7.317973 | 5.049574  | 16.225870 |
| Ti | -5.627771 | 6.153514  | 16.617036 |
| O  | -6.247446 | 6.350530  | 18.419417 |
| O  | -6.965687 | 4.388136  | 20.737312 |
| Ti | -5.620756 | 5.896195  | 20.121614 |
| O  | -6.437636 | 2.616183  | 17.761275 |
| O  | -4.556782 | 7.734158  | 16.104386 |
| O  | -4.336170 | 4.827378  | 16.671093 |
| Ti | -3.285315 | 3.243448  | 16.550785 |
| O  | -8.854393 | 3.503527  | 18.362893 |
| O  | -3.068193 | 2.672215  | 18.355005 |
| O  | -4.332563 | 4.567971  | 20.092505 |
| Ti | -3.213326 | 2.991089  | 20.172129 |
| Ti | -6.361362 | 0.676620  | 16.563176 |
| O  | -8.091358 | 1.463024  | 15.977100 |
| O  | -4.644553 | 1.582804  | 20.639600 |
| O  | -5.069716 | -1.076722 | 20.890488 |
| O  | -6.730330 | -0.307387 | 18.123904 |
| Ti | -5.846999 | 0.137713  | 19.736819 |
| O  | -7.343125 | 1.333337  | 20.223625 |
| O  | -4.690169 | 1.743686  | 16.194327 |
| O  | -2.030891 | -1.470944 | 16.755735 |
| O  | -2.115433 | -1.857630 | 20.563078 |
| O  | -1.834562 | 1.295951  | 20.604945 |
| Ti | -3.206615 | -0.376945 | 20.606281 |
| O  | -3.849095 | 0.031476  | 18.700370 |
| O  | -1.860457 | 1.439158  | 16.385678 |
| Ti | -3.216074 | -0.025686 | 16.850840 |
| O  | -5.012246 | -0.830206 | 16.204611 |
| O  | -1.533171 | 4.236802  | 16.237167 |
| O  | -1.552737 | 4.150234  | 20.590581 |
| O  | 0.720895  | 0.815408  | 21.135145 |

|    |           |           |           |
|----|-----------|-----------|-----------|
| Ti | -0.064687 | 2.492466  | 20.377050 |
| O  | -0.040098 | 2.438205  | 18.532871 |
| O  | 1.213582  | 1.134483  | 16.320359 |
| Ti | -0.048807 | 2.477495  | 16.627658 |
| O  | 4.180802  | 3.715092  | 16.511968 |
| Ti | 5.478217  | 2.343923  | 16.652399 |
| O  | 5.578276  | 2.171425  | 18.526548 |
| O  | 4.131648  | 3.805087  | 20.559392 |
| Ti | 5.421314  | 2.450921  | 20.368663 |
| O  | 6.886634  | 0.708498  | 20.705069 |
| O  | 6.994242  | 0.570519  | 16.320172 |
| O  | 7.223313  | 3.395619  | 16.257422 |
| O  | 7.155262  | 3.481457  | 20.722616 |
| O  | 13.063198 | -0.258929 | 20.464543 |
| Ti | 11.236248 | -0.948224 | 20.077150 |
| O  | 11.697455 | -1.382013 | 18.299914 |
| O  | 13.029984 | -0.120944 | 15.909663 |
| Ti | 11.317161 | -0.987968 | 16.502746 |
| O  | 10.060718 | -2.458155 | 20.560461 |
| O  | 10.026093 | 0.462540  | 20.206069 |
| Ti | 8.651549  | 1.786537  | 20.378441 |
| O  | 8.452561  | 1.965930  | 18.503715 |
| O  | 10.057530 | 0.379525  | 16.482638 |
| Ti | 8.670060  | 1.701655  | 16.677976 |
| Ti | 2.508900  | -0.176498 | 16.781896 |
| O  | 2.486212  | 0.181590  | 18.643948 |
| Ti | 2.306888  | -0.146235 | 20.474459 |
| Ti | -0.555017 | -2.706353 | 16.758501 |
| O  | 1.081877  | -1.697614 | 20.195451 |
| O  | 0.515945  | -4.219402 | 20.922599 |
| O  | -0.951069 | -3.332630 | 18.480769 |
| Ti | -0.483852 | -2.812494 | 20.213925 |
| O  | 1.127247  | -1.706739 | 16.614229 |
| Ti | 5.434997  | -4.938912 | 19.843662 |
| O  | 5.550189  | -6.412837 | 18.590229 |
| Ti | 5.589471  | -5.316551 | 17.057954 |
| O  | 5.551440  | -3.802570 | 18.291841 |
| O  | 3.733934  | -5.042943 | 16.321092 |
| O  | 3.725398  | -4.921566 | 20.548301 |
| O  | 3.740190  | -1.831740 | 20.828336 |
| Ti | 2.355585  | -3.570818 | 20.589802 |
| O  | 2.435792  | -3.409938 | 18.634413 |
| O  | 3.848291  | -2.049041 | 16.332436 |
| Ti | 2.511019  | -3.553219 | 16.807777 |
| O  | 0.659555  | -4.342095 | 16.388099 |
| O  | 4.281346  | 0.694032  | 16.306357 |
| O  | 4.084287  | 0.858600  | 20.817283 |
| Ti | 8.336591  | -3.383950 | 20.305089 |
| O  | 8.785435  | -3.972750 | 18.596679 |
| O  | 10.268893 | -2.667398 | 16.219624 |
| Ti | 8.560028  | -3.465731 | 16.764351 |
| O  | 7.456984  | -5.120223 | 16.433184 |

|    |           |           |           |
|----|-----------|-----------|-----------|
| O  | 6.971897  | -4.812102 | 20.995679 |
| O  | 6.979132  | -2.091112 | 20.467923 |
| Ti | 5.527010  | -0.823195 | 20.318436 |
| O  | 5.244956  | -0.791553 | 18.493229 |
| O  | 7.364194  | -2.054481 | 16.737361 |
| Ti | 5.687067  | -1.094491 | 16.658783 |
| Ti | 1.270620  | 11.858191 | 22.343332 |
| O  | 1.200090  | 11.554410 | 24.215347 |
| O  | -0.412265 | 11.124618 | 26.758688 |
| Ti | 1.279948  | 11.590211 | 26.107581 |
| O  | 2.192613  | 13.261303 | 26.219848 |
| O  | 2.530677  | 13.393437 | 21.904315 |
| O  | 2.505503  | 10.518872 | 21.713077 |
| Ti | 4.144648  | 9.907176  | 22.846654 |
| O  | 4.101250  | 9.372294  | 24.728877 |
| O  | 2.641100  | 10.590432 | 26.909373 |
| Ti | 4.051674  | 9.350584  | 26.552593 |
| O  | 5.438355  | 7.801752  | 27.235368 |
| O  | 5.504805  | 8.136926  | 22.636287 |
| Ti | 4.353289  | 13.393530 | 22.613093 |
| O  | 4.087225  | 14.496132 | 24.157467 |
| Ti | 3.883581  | 13.131832 | 25.422168 |
| O  | 4.043054  | 11.823136 | 23.892726 |
| O  | 5.277858  | 12.938859 | 26.608612 |
| O  | 6.172498  | 13.860345 | 22.329666 |
| O  | 6.030374  | 10.773413 | 22.624777 |
| Ti | 7.460597  | 12.544766 | 22.652147 |
| O  | 7.171685  | 12.131440 | 24.579993 |
| O  | 5.836621  | 10.255643 | 26.950778 |
| Ti | 6.854320  | 11.846157 | 26.364689 |
| O  | 8.385553  | 12.414549 | 27.420097 |
| O  | 8.353109  | 10.092159 | 26.126783 |
| O  | 8.772741  | 10.630378 | 22.957511 |
| O  | 9.227581  | 13.352094 | 22.780761 |
| O  | 10.527596 | 12.169721 | 25.276512 |
| Ti | 10.206509 | 11.917344 | 23.435261 |
| Ti | 9.702336  | 11.284767 | 26.676883 |
| Ti | 7.111978  | 8.546992  | 26.520012 |
| O  | 7.071368  | 8.201256  | 24.693481 |
| Ti | 7.244983  | 9.117131  | 23.047052 |
| O  | -0.588372 | 11.428765 | 22.085917 |
| O  | 8.886767  | 8.256325  | 22.346429 |
| Ti | 9.835250  | 6.643188  | 22.776300 |
| O  | 9.518076  | 6.393432  | 24.680076 |
| O  | 8.479639  | 7.547546  | 27.352315 |
| Ti | 9.508031  | 6.205583  | 26.531631 |
| O  | 10.883056 | 4.600530  | 27.143385 |
| O  | 11.185179 | 5.040222  | 22.125676 |
| O  | 11.004244 | 10.069897 | 27.280860 |
| O  | 11.606835 | 11.264148 | 22.493920 |
| O  | 11.789079 | 7.372949  | 22.867305 |
| Ti | 12.297539 | 9.405371  | 22.397012 |

|    |           |          |           |
|----|-----------|----------|-----------|
| O  | 12.039300 | 9.261722 | 24.458913 |
| O  | 11.422925 | 6.992340 | 26.528800 |
| Ti | 11.970187 | 8.828705 | 26.224895 |
| O  | 13.738533 | 8.693515 | 27.015363 |
| O  | 13.510336 | 6.561925 | 24.974361 |
| O  | 14.580269 | 6.974786 | 22.275103 |
| O  | 14.226556 | 9.932447 | 22.444955 |
| O  | 15.646302 | 8.839620 | 24.757816 |
| Ti | 15.454856 | 8.696332 | 22.908085 |
| O  | 17.041064 | 7.900645 | 22.349724 |
| Ti | 14.784027 | 7.668695 | 25.902084 |
| O  | 16.083160 | 6.396633 | 26.370787 |
| Ti | 16.439753 | 5.028417 | 25.126029 |
| Ti | 16.567793 | 5.982755 | 22.313045 |
| O  | 16.531007 | 3.401612 | 26.021799 |
| Ti | 14.775023 | 2.604842 | 25.868918 |
| O  | 14.752608 | 2.558469 | 24.026061 |
| O  | 16.602693 | 4.146112 | 21.514773 |
| Ti | 14.936942 | 3.190483 | 22.155159 |
| O  | 15.081356 | 5.050143 | 23.648748 |
| O  | 13.764975 | 4.055950 | 26.598276 |
| Ti | 12.347133 | 5.099750 | 25.971318 |
| O  | 17.688525 | 5.558761 | 23.868643 |
| O  | 11.960285 | 4.386413 | 24.292191 |
| O  | 13.502624 | 4.324772 | 21.576322 |
| Ti | 12.972884 | 5.746301 | 23.032196 |
| Ti | -1.546752 | 9.771323 | 22.554509 |
| O  | -1.736782 | 9.899857 | 24.459523 |
| O  | -3.067181 | 8.813946 | 26.819797 |
| Ti | -1.396189 | 9.550321 | 26.254736 |
| O  | -0.223297 | 8.465132 | 22.578384 |
| Ti | 1.154248  | 7.180337 | 22.835451 |
| O  | 1.216097  | 6.906775 | 24.735947 |
| O  | -0.150947 | 8.264814 | 26.797888 |
| Ti | 1.200249  | 6.934726 | 26.591659 |
| O  | 2.595906  | 5.387876 | 27.349116 |
| O  | 2.559212  | 5.435299 | 22.643231 |
| O  | 2.847636  | 8.224478 | 22.591575 |
| O  | 2.839825  | 7.895170 | 27.138535 |
| Ti | 4.273736  | 6.236685 | 26.774051 |
| O  | 4.212062  | 6.312320 | 24.921248 |
| Ti | 4.305196  | 6.477017 | 23.018548 |
| Ti | -6.304780 | 4.422653 | 22.924155 |
| Ti | -5.710132 | 4.652238 | 25.685729 |
| O  | -5.969285 | 6.245399 | 22.194595 |
| Ti | -4.251321 | 7.270705 | 22.619233 |
| O  | -4.581036 | 7.850247 | 24.386763 |
| O  | -5.327123 | 6.216878 | 26.633998 |
| Ti | -3.865894 | 7.301111 | 26.021295 |
| O  | -4.674015 | 4.533990 | 24.102185 |
| O  | -3.293424 | 8.925880 | 22.157609 |
| O  | -2.874629 | 6.012627 | 22.708061 |

|    |           |           |           |
|----|-----------|-----------|-----------|
| Ti | -1.816814 | 4.441104  | 22.735267 |
| O  | -7.264461 | 4.648213  | 24.563513 |
| O  | -0.598837 | 4.355491  | 24.362149 |
| O  | -2.482046 | 6.031497  | 26.046041 |
| Ti | -1.280665 | 4.560836  | 26.087032 |
| Ti | -4.517045 | 1.678617  | 22.805396 |
| O  | -6.195210 | 2.563483  | 22.635286 |
| O  | -2.642130 | 3.178342  | 25.891845 |
| O  | -2.882838 | 0.772716  | 27.037299 |
| O  | -4.674266 | 1.116286  | 24.616699 |
| Ti | -4.037247 | 1.943360  | 26.135226 |
| O  | -5.438498 | 3.101012  | 26.716377 |
| O  | -3.214493 | 3.074337  | 22.461764 |
| O  | -0.356625 | -1.164559 | 22.588532 |
| O  | -0.080188 | -0.200847 | 27.324018 |
| O  | -0.176237 | 2.785133  | 26.944819 |
| Ti | -1.090229 | 1.161912  | 26.412415 |
| O  | -0.930448 | 0.909519  | 24.570365 |
| O  | -0.439679 | 2.669732  | 22.566012 |
| Ti | -1.030279 | 0.692126  | 22.629943 |
| O  | -3.025662 | 0.276633  | 22.566215 |
| O  | -0.090296 | 5.575206  | 22.337194 |
| O  | 0.111860  | 5.346095  | 27.199558 |
| O  | 2.784916  | 2.487159  | 27.552669 |
| Ti | 1.621404  | 3.749298  | 26.794655 |
| O  | 1.867422  | 3.776648  | 24.978368 |
| O  | 2.410300  | 2.409665  | 22.660639 |
| Ti | 1.251124  | 3.895692  | 23.115007 |
| O  | 5.609727  | 5.163127  | 22.721488 |
| Ti | 6.930558  | 3.832818  | 22.962126 |
| O  | 6.749742  | 3.667884  | 24.872572 |
| O  | 5.507369  | 4.950650  | 27.366854 |
| Ti | 6.738160  | 3.685013  | 26.723912 |
| O  | 8.221116  | 2.073425  | 27.255341 |
| O  | 8.433681  | 2.150969  | 22.573688 |
| O  | 8.652730  | 4.924296  | 22.632387 |
| O  | 8.406052  | 4.681322  | 27.051517 |
| O  | 14.135316 | 1.053805  | 26.683332 |
| Ti | 12.392824 | 0.368365  | 26.223513 |
| O  | 12.691220 | 0.145317  | 24.400058 |
| O  | 14.362755 | 1.322668  | 21.848529 |
| Ti | 12.643211 | 0.490430  | 22.515953 |
| O  | 11.501723 | -1.164652 | 26.905770 |
| O  | 11.226566 | 1.731119  | 26.743975 |
| Ti | 9.790164  | 2.976978  | 26.576848 |
| O  | 9.635841  | 3.066843  | 24.755636 |
| O  | 11.486431 | 1.956287  | 22.498931 |
| Ti | 10.197725 | 3.320773  | 22.923216 |
| Ti | 3.843996  | 1.273598  | 22.980460 |
| O  | 4.204223  | 1.578297  | 24.826246 |
| Ti | 4.043237  | 1.399451  | 26.657980 |
| Ti | 1.209520  | -1.730659 | 23.391371 |

|    |           |           |           |
|----|-----------|-----------|-----------|
| O  | 2.731649  | -0.070106 | 26.431412 |
| O  | 2.609162  | -2.441446 | 27.584649 |
| O  | 0.771203  | -2.063935 | 25.174932 |
| Ti | 1.339634  | -1.271787 | 26.777083 |
| O  | 2.589788  | -0.411453 | 22.929019 |
| Ti | 7.161732  | -3.558680 | 25.861278 |
| O  | 7.079846  | -5.069467 | 24.666437 |
| Ti | 7.052274  | -4.020777 | 23.087634 |
| O  | 7.161605  | -2.453360 | 24.318747 |
| O  | 5.237795  | -3.661663 | 22.596382 |
| O  | 5.638369  | -3.204932 | 26.877638 |
| O  | 5.330617  | -0.384766 | 27.159629 |
| Ti | 4.229539  | -1.916050 | 26.663869 |
| O  | 3.924780  | -2.037842 | 24.816838 |
| O  | 5.363734  | -0.544424 | 22.614924 |
| Ti | 4.191671  | -2.152443 | 22.931697 |
| O  | 2.302587  | -3.120640 | 22.653281 |
| O  | 5.674364  | 2.181916  | 22.582441 |
| O  | 5.728416  | 2.097864  | 27.390707 |
| Ti | 9.835790  | -1.880580 | 26.339300 |
| O  | 10.232092 | -2.205991 | 24.553007 |
| O  | 11.579276 | -1.176356 | 22.253449 |
| Ti | 9.847226  | -1.981732 | 22.703134 |
| O  | 8.865795  | -3.737985 | 22.370165 |
| O  | 8.806329  | -3.446309 | 26.758049 |
| O  | 8.514466  | -0.667769 | 26.916678 |
| Ti | 7.067251  | 0.530192  | 26.667711 |
| O  | 6.967920  | 0.637387  | 24.829504 |
| O  | 8.611135  | -0.612222 | 22.588874 |
| Ti | 7.121910  | 0.540836  | 22.930386 |

48c-like 3-D (2,1,4)-mer

|    |           |           |           |
|----|-----------|-----------|-----------|
| Ti | -4.258290 | 6.914055  | -1.882141 |
| O  | -4.685741 | 7.220907  | -0.100874 |
| O  | -6.109892 | 6.219971  | 2.210709  |
| Ti | -4.375139 | 7.002921  | 1.766747  |
| O  | -3.391809 | 8.750769  | 2.087046  |
| O  | -3.233533 | 8.493335  | -2.266784 |
| O  | -2.927134 | 5.716565  | -2.469016 |
| Ti | -1.471089 | 4.526298  | -2.201698 |
| O  | -1.435810 | 4.413637  | -0.362830 |
| O  | -3.143445 | 5.630522  | 1.874277  |
| Ti | -1.629595 | 4.509362  | 1.537051  |
| O  | -0.206069 | 2.852818  | 1.870727  |
| O  | -0.121141 | 2.965039  | -2.926990 |
| Ti | -1.594892 | 8.609335  | -1.364633 |
| O  | -1.539028 | 10.103604 | -0.147829 |
| Ti | -1.559549 | 9.036696  | 1.420598  |
| O  | -1.593226 | 7.488677  | 0.173342  |
| O  | 0.241322  | 8.727809  | 2.024428  |
| O  | -0.086161 | 8.287087  | -2.411777 |
| O  | 0.249427  | 5.454116  | -2.709630 |

|    |           |           |           |
|----|-----------|-----------|-----------|
| Ti | 1.312448  | 6.993064  | -2.159401 |
| O  | 1.491347  | 7.043558  | -0.309862 |
| O  | 0.099758  | 5.608604  | 1.891975  |
| Ti | 1.306154  | 7.219679  | 1.574556  |
| O  | 3.182660  | 8.106090  | 1.807821  |
| O  | 2.829156  | 5.401600  | 1.647243  |
| O  | 2.855737  | 5.146994  | -2.027255 |
| O  | 2.988332  | 7.631683  | -2.909328 |
| O  | 4.740855  | 7.002567  | -0.433852 |
| Ti | 4.219145  | 6.425424  | -2.114623 |
| Ti | 4.372190  | 6.548870  | 1.382795  |
| Ti | 1.627202  | 3.714069  | 1.504857  |
| O  | 1.341514  | 3.510395  | -0.377722 |
| Ti | 1.564572  | 3.665133  | -2.202166 |
| O  | -5.919409 | 6.205079  | -2.474261 |
| O  | 2.856324  | 2.576448  | -3.076880 |
| Ti | 4.027963  | 1.272365  | -2.412304 |
| O  | 3.816175  | 1.249654  | -0.598880 |
| O  | 3.101794  | 2.606931  | 1.681979  |
| Ti | 4.369403  | 1.214606  | 1.284651  |
| O  | 5.736034  | -0.508269 | 1.978459  |
| O  | 5.550165  | -0.302899 | -2.810219 |
| O  | 6.010790  | 5.596940  | 1.612005  |
| O  | 5.672163  | 5.407652  | -2.792594 |
| O  | 5.852774  | 2.243464  | -2.596900 |
| Ti | 6.689317  | 3.906406  | -2.277393 |
| O  | 7.091165  | 3.896529  | -0.462579 |
| O  | 5.962591  | 2.463463  | 1.838504  |
| Ti | 7.111641  | 4.096530  | 1.473511  |
| O  | 9.012295  | 4.821065  | 1.781664  |
| O  | 8.590280  | 2.224879  | 1.856158  |
| O  | 8.671282  | 1.357261  | -1.735491 |
| O  | 8.438310  | 3.936535  | -3.074369 |
| O  | 10.230197 | 3.904325  | -0.462024 |
| Ti | 9.636500  | 3.008378  | -1.971388 |
| O  | 11.202443 | 2.018947  | -2.425991 |
| Ti | 10.234095 | 3.231246  | 1.333994  |
| O  | 11.980240 | 2.585913  | 1.744794  |
| Ti | 11.958204 | 0.686110  | 1.464568  |
| Ti | 11.019471 | 0.521544  | -1.278711 |
| O  | 11.487271 | -1.135752 | 2.094436  |
| Ti | 9.832741  | -2.286278 | 1.770239  |
| O  | 10.203181 | -2.938639 | 0.042121  |
| O  | 10.588757 | -1.092081 | -2.102243 |
| Ti | 9.316414  | -2.403159 | -1.512323 |
| O  | 10.214475 | 1.044696  | 0.475183  |
| O  | 8.553776  | -0.930626 | 1.569222  |
| Ti | 7.447226  | 0.594086  | 1.666734  |
| O  | 12.650295 | 0.318355  | -0.246756 |
| O  | 6.310681  | 0.865582  | 0.008675  |
| O  | 7.829218  | -1.284371 | -1.368071 |
| Ti | 6.970222  | 0.407960  | -1.669372 |

|    |            |           |           |
|----|------------|-----------|-----------|
| Ti | -6.792070  | 4.667754  | -1.789639 |
| O  | -7.111032  | 4.861123  | 0.029130  |
| O  | -8.891770  | 3.776516  | 2.531008  |
| Ti | -7.141232  | 4.553259  | 1.932605  |
| O  | -5.617634  | 3.306564  | -2.299969 |
| Ti | -4.180663  | 2.063640  | -2.117623 |
| O  | -4.073403  | 1.968293  | -0.292979 |
| O  | -6.006576  | 3.062825  | 1.968543  |
| Ti | -4.696230  | 1.728159  | 1.527979  |
| O  | -3.169953  | 0.111694  | 1.831503  |
| O  | -2.790866  | 0.352387  | -2.565536 |
| O  | -2.614303  | 2.970643  | -2.794551 |
| O  | -2.943514  | 2.885759  | 1.892396  |
| Ti | -1.453185  | 1.195576  | 1.497958  |
| O  | -1.186917  | 1.379634  | -0.408636 |
| Ti | -1.129195  | 1.375208  | -2.255761 |
| Ti | -10.857377 | 0.008032  | -0.838575 |
| Ti | -11.048058 | -0.935996 | 1.960879  |
| O  | -10.934583 | 1.641556  | -1.724604 |
| Ti | -9.185297  | 2.442538  | -1.523831 |
| O  | -9.228027  | 2.508744  | 0.325366  |
| O  | -11.145763 | 0.925295  | 2.721657  |
| Ti | -9.440677  | 1.920654  | 2.188560  |
| O  | -9.540503  | -0.010577 | 0.672931  |
| O  | -8.524185  | 3.991993  | -2.313529 |
| O  | -8.154624  | 0.990132  | -2.212194 |
| Ti | -6.748157  | -0.051832 | -1.553940 |
| O  | -12.138621 | -0.535766 | 0.378829  |
| O  | -6.406044  | 0.673280  | 0.133395  |
| O  | -8.054084  | 0.748694  | 2.802978  |
| Ti | -7.465203  | -0.676649 | 1.368595  |
| Ti | -9.181991  | -2.634156 | -1.530727 |
| O  | -10.462506 | -1.369195 | -2.063787 |
| O  | -9.057552  | -1.914060 | 2.114477  |
| O  | -8.705470  | -4.885534 | 2.000424  |
| O  | -10.049931 | -3.800021 | -0.384587 |
| Ti | -9.902540  | -3.643432 | 1.469601  |
| O  | -11.519348 | -2.849077 | 1.943169  |
| O  | -7.932661  | -1.513451 | -0.581852 |
| O  | -5.386968  | -5.022033 | -2.794721 |
| O  | -6.025714  | -6.180904 | 1.980104  |
| O  | -6.297904  | -2.316397 | 1.576291  |
| Ti | -6.783045  | -4.340798 | 2.072970  |
| O  | -6.497246  | -4.211837 | 0.009070  |
| O  | -5.831170  | -1.950417 | -2.081529 |
| Ti | -6.375199  | -3.784877 | -1.755154 |
| O  | -8.116956  | -3.673399 | -2.606784 |
| O  | -5.267661  | 0.437166  | -2.705113 |
| O  | -5.706506  | 0.008693  | 2.326584  |
| O  | -3.372998  | -3.196041 | 2.105545  |
| Ti | -4.349926  | -1.590565 | 1.685229  |
| O  | -3.982149  | -1.360456 | -0.214976 |



|    |           |           |           |
|----|-----------|-----------|-----------|
| O  | -2.897125 | -2.511848 | -2.897606 |
| Ti | -3.910023 | -1.163495 | -2.067065 |
| O  | 0.123118  | 0.143773  | -2.940477 |
| Ti | 1.349002  | -1.153665 | -2.365060 |
| O  | 1.414555  | -1.175259 | -0.513663 |
| O  | -0.090994 | -0.103729 | 1.698313  |
| Ti | 1.271446  | -1.352697 | 1.385662  |
| O  | 2.708312  | -3.074511 | 1.797655  |
| O  | 2.750831  | -2.830233 | -2.715119 |
| O  | 3.048372  | -0.348910 | -2.992605 |
| O  | 3.041152  | -0.331979 | 1.733212  |
| O  | 8.792329  | -3.886433 | 2.255866  |
| Ti | 7.031375  | -4.746387 | 1.918418  |
| O  | 7.245925  | -4.878024 | 0.021466  |
| O  | 8.619804  | -3.923129 | -2.381294 |
| Ti | 6.918220  | -4.580369 | -1.797856 |
| O  | 6.075502  | -6.401482 | 2.539076  |
| O  | 5.731253  | -3.428884 | 1.891739  |
| Ti | 4.438747  | -2.067779 | 1.529020  |
| O  | 4.422348  | -1.825171 | -0.367573 |
| O  | 5.703477  | -3.296137 | -2.429378 |
| Ti | 4.430998  | -1.895217 | -2.222834 |
| Ti | -1.515871 | -3.475506 | -2.043770 |
| O  | -1.505852 | -3.076093 | -0.228608 |
| Ti | -1.681559 | -4.005836 | 1.411269  |
| Ti | -4.091455 | -6.222923 | -2.163313 |
| O  | -3.187132 | -5.546862 | 1.495453  |
| O  | -3.617039 | -8.271938 | 1.728595  |
| O  | -4.931309 | -7.116323 | -0.775391 |
| Ti | -4.614804 | -6.850660 | 1.062771  |
| O  | -2.742729 | -5.035929 | -1.593676 |
| Ti | 1.319071  | -8.264018 | 1.989222  |
| O  | 1.344238  | -9.382360 | 0.409191  |
| Ti | 1.634014  | -8.049660 | -0.850303 |
| O  | 1.523733  | -6.697302 | 0.647340  |
| O  | 0.313065  | -7.860509 | -2.129118 |
| O  | -0.519446 | -8.657798 | 2.376469  |
| O  | -0.460522 | -5.652645 | 1.881312  |
| Ti | -1.851513 | -7.457173 | 1.863303  |
| O  | -1.537564 | -7.088629 | -0.063416 |
| O  | -0.259952 | -5.176386 | -2.472130 |
| Ti | -1.250886 | -6.777839 | -1.856663 |
| O  | -2.781968 | -7.355746 | -2.905801 |
| O  | 0.149341  | -2.713707 | -2.764207 |
| O  | 0.062550  | -3.022682 | 1.811840  |
| Ti | 4.191446  | -6.773657 | 2.181495  |
| O  | 4.367332  | -6.275405 | 0.320435  |
| O  | 5.958889  | -6.162457 | -2.256433 |
| Ti | 4.254795  | -6.509600 | -1.534149 |
| O  | 3.355301  | -8.186134 | -1.576495 |
| O  | 3.192007  | -8.390813 | 2.330359  |
| O  | 3.056268  | -5.318322 | 2.785341  |

|    |           |           |           |
|----|-----------|-----------|-----------|
| Ti | 1.426241  | -4.776272 | 1.616323  |
| O  | 1.448159  | -4.262170 | -0.275376 |
| O  | 2.922089  | -5.534040 | -2.423997 |
| Ti | 1.536173  | -4.271369 | -2.096286 |
| Ti | -2.912465 | 8.423088  | 4.184267  |
| O  | -3.351142 | 8.924238  | 5.920912  |
| O  | -4.769941 | 7.582841  | 8.313600  |
| Ti | -3.066184 | 8.384858  | 7.737077  |
| O  | -1.931481 | 10.027042 | 8.002279  |
| O  | -1.564059 | 9.849975  | 3.501764  |
| O  | -1.579620 | 7.106847  | 4.015149  |
| Ti | -0.095598 | 5.886283  | 4.142513  |
| O  | 0.146636  | 5.660526  | 5.963702  |
| O  | -1.835783 | 7.001264  | 7.750906  |
| Ti | -0.176638 | 6.003897  | 7.801528  |
| O  | 1.271009  | 4.203052  | 8.137950  |
| O  | 1.351950  | 4.197749  | 3.677163  |
| Ti | 0.080903  | 9.907360  | 4.525556  |
| O  | -0.057634 | 11.355791 | 5.813197  |
| Ti | -0.083346 | 10.240683 | 7.330946  |
| O  | -0.006210 | 8.750449  | 6.060482  |
| O  | 1.770467  | 9.960804  | 8.064244  |
| O  | 1.830761  | 10.026824 | 3.861451  |
| O  | 1.670556  | 6.966844  | 3.709128  |
| Ti | 3.164836  | 8.675889  | 3.822590  |
| O  | 3.206923  | 8.363616  | 5.749652  |
| O  | 1.614407  | 7.041389  | 8.130630  |
| Ti | 3.009252  | 8.476882  | 7.591921  |
| O  | 4.873176  | 9.282756  | 8.007066  |
| O  | 4.432430  | 6.658088  | 7.965169  |
| O  | 4.544674  | 6.687635  | 3.613540  |
| O  | 5.035626  | 9.304367  | 3.621979  |
| O  | 6.454921  | 8.064725  | 5.962145  |
| Ti | 6.055382  | 7.842560  | 4.173925  |
| Ti | 6.109047  | 7.645922  | 7.774466  |
| Ti | 3.023078  | 5.138087  | 7.772779  |
| O  | 2.971772  | 5.463262  | 5.908297  |
| Ti | 3.042268  | 5.280544  | 4.071865  |
| O  | -4.634809 | 7.497629  | 3.908305  |
| O  | 4.426318  | 4.006416  | 3.859278  |
| Ti | 5.694844  | 2.654697  | 4.007620  |
| O  | 5.956851  | 2.420931  | 5.852729  |
| O  | 4.243689  | 3.711096  | 7.866819  |
| Ti | 5.586375  | 2.395661  | 7.697447  |
| O  | 7.072110  | 0.681134  | 8.108448  |
| O  | 7.237122  | 0.905094  | 3.758257  |
| O  | 7.625367  | 6.516973  | 7.939019  |
| O  | 7.627302  | 7.053036  | 3.491032  |
| O  | 7.456549  | 3.830496  | 3.661930  |
| Ti | 8.782499  | 5.563736  | 3.705703  |
| O  | 8.851096  | 5.185316  | 5.619286  |
| O  | 7.358958  | 3.526675  | 8.009171  |

|    |            |           |          |
|----|------------|-----------|----------|
| Ti | 8.694976   | 5.002938  | 7.483487 |
| O  | 10.508275  | 5.759175  | 8.113460 |
| O  | 10.202158  | 3.209883  | 8.125193 |
| O  | 10.400351  | 3.388885  | 3.680999 |
| O  | 10.700559  | 6.128466  | 3.598095 |
| O  | 12.111965  | 5.150348  | 6.101972 |
| Ti | 11.663182  | 4.748815  | 4.342452 |
| O  | 13.261625  | 3.660382  | 4.058826 |
| Ti | 11.850488  | 4.254777  | 7.756477 |
| O  | 13.656112  | 3.478700  | 8.242509 |
| Ti | 13.584775  | 1.600963  | 7.613986 |
| Ti | 13.082979  | 1.985531  | 4.809585 |
| O  | 12.904434  | -0.114933 | 8.141639 |
| Ti | 11.191256  | -1.140958 | 7.745214 |
| O  | 11.774854  | -1.233938 | 5.905768 |
| O  | 12.653664  | 0.613331  | 3.560859 |
| Ti | 11.182777  | -0.799425 | 4.194415 |
| O  | 12.059233  | 2.305526  | 6.471802 |
| O  | 9.880634   | 0.169975  | 7.706976 |
| Ti | 8.781658   | 1.718697  | 7.787461 |
| O  | 14.506542  | 1.410205  | 5.975256 |
| O  | 8.797022   | 2.424460  | 6.000283 |
| O  | 9.937730   | 0.548333  | 4.119467 |
| Ti | 8.838440   | 2.176140  | 4.177497 |
| Ti | -5.768970  | 5.960802  | 4.422167 |
| O  | -6.169632  | 6.305708  | 6.230349 |
| O  | -7.536507  | 5.095372  | 8.686735 |
| Ti | -5.817775  | 5.896461  | 8.044034 |
| O  | -4.549615  | 4.556053  | 4.247257 |
| Ti | -3.167925  | 3.241006  | 4.098067 |
| O  | -2.979425  | 3.003070  | 5.970285 |
| O  | -4.534510  | 4.550490  | 8.031784 |
| Ti | -3.144979  | 3.231523  | 7.810111 |
| O  | -1.703445  | 1.514250  | 8.213322 |
| O  | -1.673954  | 1.539695  | 3.748089 |
| O  | -1.416092  | 4.302899  | 3.766952 |
| O  | -1.460912  | 4.336251  | 8.167492 |
| Ti | 0.061240   | 2.542490  | 7.828660 |
| O  | -0.052796  | 2.715942  | 5.952753 |
| Ti | 0.049256   | 2.573905  | 4.098187 |
| Ti | -10.657396 | 0.648759  | 4.828355 |
| Ti | -10.047808 | 0.287700  | 7.620558 |
| O  | -9.942303  | 2.366654  | 4.369531 |
| Ti | -8.476029  | 3.710587  | 4.750329 |
| O  | -8.950036  | 4.078256  | 6.507585 |
| O  | -9.834869  | 1.984078  | 8.296921 |
| Ti | -8.439305  | 3.358848  | 8.223143 |
| O  | -9.126624  | -0.140697 | 5.852759 |
| O  | -7.593938  | 5.303406  | 3.987901 |
| O  | -7.028818  | 2.554743  | 4.771747 |
| Ti | -6.285773  | 0.883423  | 4.219440 |
| O  | -11.579787 | 0.693874  | 6.416752 |

|    |            |           |          |
|----|------------|-----------|----------|
| O  | -5.716166  | 0.436917  | 6.023871 |
| O  | -7.012499  | 2.186824  | 8.154544 |
| Ti | -6.047480  | 0.525771  | 7.815547 |
| Ti | -8.849608  | -1.925912 | 4.415211 |
| O  | -10.713299 | -1.199650 | 3.997156 |
| O  | -7.780601  | -0.589451 | 8.179671 |
| O  | -7.547289  | -3.434136 | 8.452531 |
| O  | -9.198533  | -2.997780 | 5.934163 |
| Ti | -8.704708  | -2.342916 | 7.609668 |
| O  | -10.252171 | -1.479044 | 8.336765 |
| O  | -7.154692  | -0.967585 | 4.551754 |
| O  | -5.269620  | -4.259663 | 3.574153 |
| O  | -4.827801  | -4.884777 | 8.408623 |
| O  | -4.754429  | -1.133471 | 8.289531 |
| Ti | -5.537551  | -3.074776 | 8.502940 |
| O  | -5.663906  | -2.853277 | 6.486658 |
| O  | -4.352394  | -1.553791 | 3.925842 |
| Ti | -5.823562  | -2.592588 | 4.686637 |
| O  | -7.579625  | -3.322592 | 3.762384 |
| O  | -4.376336  | 1.557557  | 3.768930 |
| O  | -4.350004  | 1.599238  | 8.358828 |
| O  | -1.723547  | -1.546475 | 8.288619 |
| Ti | -2.946871  | -0.154554 | 7.953648 |
| O  | -2.923877  | -0.048498 | 6.066463 |
| O  | -1.468698  | -1.205928 | 3.718066 |
| Ti | -2.933476  | -0.072810 | 4.194830 |
| O  | 1.448962   | 1.340519  | 3.780980 |
| Ti | 2.768320   | 0.007233  | 3.971902 |
| O  | 2.787358   | -0.182659 | 5.850113 |
| O  | 1.305922   | 1.131279  | 7.976814 |
| Ti | 2.580423   | -0.252099 | 7.700447 |
| O  | 4.009976   | -2.001098 | 8.146701 |
| O  | 4.224086   | -1.787233 | 3.724089 |
| O  | 4.516261   | 1.006642  | 3.651860 |
| O  | 4.316407   | 0.820835  | 8.095215 |
| O  | 10.214116  | -2.738089 | 8.255722 |
| Ti | 8.433332   | -3.616139 | 7.969526 |
| O  | 8.940826   | -3.944075 | 6.167741 |
| O  | 10.257530  | -2.512104 | 3.865452 |
| Ti | 8.550550   | -3.434175 | 4.411888 |
| O  | 7.401125   | -5.200345 | 8.517689 |
| O  | 7.134736   | -2.278636 | 7.889609 |
| Ti | 5.746971   | -0.971221 | 7.836603 |
| O  | 5.624434   | -0.536659 | 6.000142 |
| O  | 7.363800   | -2.009646 | 4.271711 |
| Ti | 5.926261   | -0.728203 | 4.182776 |
| Ti | -0.194707  | -2.521653 | 4.021253 |
| O  | -0.430180  | -2.778450 | 5.890329 |
| Ti | -0.433232  | -2.847754 | 7.724764 |
| Ti | -3.428259  | -4.911778 | 3.658985 |
| O  | -1.992928  | -4.256666 | 8.012264 |
| O  | -2.467243  | -6.950639 | 7.874991 |

|    |           |           |           |
|----|-----------|-----------|-----------|
| O  | -3.709877 | -5.235790 | 5.530248  |
| Ti | -3.440849 | -5.457740 | 7.341953  |
| O  | -1.621899 | -4.051998 | 3.725865  |
| Ti | 2.405430  | -7.179670 | 8.031115  |
| O  | 2.533190  | -8.328219 | 6.467797  |
| Ti | 2.604985  | -6.993059 | 5.177064  |
| O  | 2.558498  | -5.693433 | 6.638221  |
| O  | 1.123024  | -7.195153 | 3.899713  |
| O  | 0.583632  | -7.607876 | 8.372539  |
| O  | 0.811792  | -4.536982 | 8.198383  |
| Ti | -0.657892 | -6.236585 | 8.073189  |
| O  | -0.426717 | -5.917326 | 6.091009  |
| O  | 1.062269  | -4.405927 | 3.831386  |
| Ti | -0.383966 | -5.807736 | 4.277255  |
| O  | -2.180250 | -6.598437 | 3.709172  |
| O  | 1.564955  | -1.644741 | 3.638924  |
| O  | 1.302971  | -1.844164 | 8.111042  |
| Ti | 5.614184  | -5.967190 | 8.196180  |
| O  | 6.056424  | -6.455512 | 6.431372  |
| O  | 7.525847  | -5.088218 | 4.062740  |
| Ti | 5.797901  | -5.778741 | 4.689986  |
| O  | 4.323456  | -7.157146 | 4.378764  |
| O  | 4.202280  | -7.384977 | 8.785377  |
| O  | 4.359818  | -4.600583 | 8.230012  |
| Ti | 2.680075  | -3.665202 | 7.695055  |
| O  | 2.506798  | -3.162082 | 5.882718  |
| O  | 4.711365  | -4.306222 | 4.640910  |
| Ti | 2.997009  | -3.446616 | 4.065756  |
| Ti | -1.470131 | 9.719742  | 10.112599 |
| O  | -1.698021 | 10.211648 | 11.950713 |
| O  | -3.063109 | 8.807054  | 14.234627 |
| Ti | -1.458194 | 9.788615  | 13.786949 |
| O  | -0.139981 | 11.319093 | 14.146521 |
| O  | -0.135030 | 11.092188 | 9.331009  |
| O  | -0.299726 | 8.295102  | 9.932596  |
| Ti | 1.440223  | 7.405633  | 10.348963 |
| O  | 1.536949  | 6.680571  | 12.112840 |
| O  | 0.163208  | 8.720219  | 13.693908 |
| Ti | 1.313380  | 7.122852  | 13.907635 |
| O  | 2.717028  | 5.410741  | 14.351748 |
| O  | 2.830359  | 5.586240  | 9.943353  |
| Ti | 1.682093  | 10.883715 | 10.098209 |
| O  | 1.343298  | 11.977216 | 11.612553 |
| Ti | 1.331907  | 10.652752 | 12.975229 |
| O  | 1.545636  | 9.355876  | 11.388258 |
| O  | 2.951231  | 10.786200 | 13.863666 |
| O  | 3.508584  | 11.314883 | 9.767471  |
| O  | 3.306085  | 8.284434  | 9.846677  |
| Ti | 4.795154  | 9.962026  | 9.962945  |
| O  | 4.820164  | 9.619667  | 11.900983 |
| O  | 3.111643  | 8.149060  | 14.265636 |
| Ti | 4.513557  | 9.653481  | 13.738258 |

|    |           |           |           |
|----|-----------|-----------|-----------|
| O  | 6.274972  | 10.543010 | 14.303703 |
| O  | 5.943924  | 7.899752  | 14.236970 |
| O  | 6.174894  | 7.926522  | 9.940132  |
| O  | 6.671176  | 10.612444 | 9.888585  |
| O  | 8.015529  | 9.311995  | 12.350411 |
| Ti | 7.613191  | 9.159097  | 10.542661 |
| Ti | 7.602849  | 8.952519  | 14.157074 |
| Ti | 4.496072  | 6.374935  | 14.020758 |
| O  | 4.535939  | 6.738233  | 12.161055 |
| Ti | 4.578978  | 6.584098  | 10.319659 |
| O  | -3.273023 | 8.938271  | 9.895128  |
| O  | 5.808967  | 5.157846  | 10.007171 |
| Ti | 7.118441  | 3.836694  | 10.182483 |
| O  | 7.253840  | 3.570743  | 12.045037 |
| O  | 5.640229  | 4.909317  | 14.137816 |
| Ti | 7.022766  | 3.643354  | 13.894150 |
| O  | 8.479530  | 1.962830  | 14.321207 |
| O  | 8.585872  | 2.057930  | 9.930733  |
| O  | 9.210238  | 7.949248  | 14.491171 |
| O  | 9.035138  | 8.345022  | 9.648488  |
| O  | 8.901780  | 4.871785  | 9.875627  |
| Ti | 9.958894  | 6.690677  | 9.894642  |
| O  | 9.870605  | 6.493053  | 11.868619 |
| O  | 8.711062  | 4.833980  | 14.199710 |
| Ti | 10.030879 | 6.298390  | 13.698493 |
| O  | 11.799853 | 7.187852  | 14.214850 |
| O  | 11.558636 | 4.593113  | 14.191510 |
| O  | 12.056223 | 4.228567  | 10.012802 |
| O  | 11.877400 | 7.055238  | 9.929665  |
| O  | 13.579198 | 6.867749  | 12.331252 |
| Ti | 13.104526 | 5.972079  | 10.768112 |
| O  | 14.672413 | 5.211493  | 10.012224 |
| Ti | 13.180171 | 5.757122  | 13.814041 |
| O  | 14.948437 | 4.863582  | 14.179078 |
| Ti | 14.651223 | 3.065722  | 13.366648 |
| Ti | 14.116217 | 3.411119  | 10.386774 |
| O  | 13.847943 | 1.450764  | 13.976115 |
| Ti | 12.399701 | 0.043957  | 13.790515 |
| O  | 13.059455 | -0.353312 | 12.052562 |
| O  | 14.043643 | 1.504520  | 9.706171  |
| Ti | 12.588834 | 0.212733  | 10.326648 |
| O  | 13.251276 | 4.149205  | 12.251164 |
| O  | 11.052495 | 1.322617  | 13.705638 |
| Ti | 10.217494 | 3.020170  | 13.964604 |
| O  | 15.419217 | 2.744777  | 11.722095 |
| O  | 10.147671 | 3.648350  | 12.163283 |
| O  | 11.291435 | 1.519926  | 10.369635 |
| Ti | 10.269306 | 3.194678  | 10.375192 |
| Ti | -4.320931 | 7.342285  | 10.463662 |
| O  | -4.768195 | 7.748782  | 12.269701 |
| O  | -6.074589 | 6.418356  | 14.710524 |
| Ti | -4.357884 | 7.268461  | 14.037322 |

|    |           |           |           |
|----|-----------|-----------|-----------|
| O  | -3.004764 | 6.028117  | 10.396853 |
| Ti | -1.641763 | 4.682725  | 10.335555 |
| O  | -1.565872 | 4.347264  | 12.192317 |
| O  | -3.163370 | 5.849934  | 14.107950 |
| Ti | -1.789259 | 4.504180  | 14.022194 |
| O  | -0.343558 | 2.826496  | 14.465032 |
| O  | -0.187212 | 2.934391  | 10.002687 |
| O  | 0.084985  | 5.727182  | 9.955336  |
| O  | -0.108482 | 5.686070  | 14.350718 |
| Ti | 1.439890  | 3.793756  | 14.068504 |
| O  | 1.236512  | 3.918427  | 12.216533 |
| Ti | 1.549235  | 4.005318  | 10.374135 |
| Ti | -8.902244 | 2.053413  | 11.522754 |
| Ti | -8.548550 | 1.619683  | 14.323282 |
| O  | -8.714420 | 3.591857  | 10.398425 |
| Ti | -7.051953 | 4.799908  | 10.768327 |
| O  | -7.540994 | 5.098418  | 12.583013 |
| O  | -8.394877 | 3.485697  | 15.113200 |
| Ti | -6.947854 | 4.664049  | 14.338996 |
| O  | -7.407622 | 1.757623  | 12.646816 |
| O  | -6.057129 | 6.404517  | 10.214348 |
| O  | -5.692167 | 3.523503  | 10.726629 |
| Ti | -4.611296 | 1.981399  | 10.482947 |
| O  | -9.976946 | 2.083473  | 13.057070 |
| O  | -4.556548 | 1.234209  | 12.249878 |
| O  | -5.542412 | 3.483151  | 14.248183 |
| Ti | -4.760321 | 1.700723  | 14.044936 |
| Ti | -7.589014 | -0.680887 | 10.348798 |
| O  | -9.088383 | 0.511117  | 10.460416 |
| O  | -6.386399 | 0.569683  | 14.579052 |
| O  | -6.108512 | -2.269917 | 14.479011 |
| O  | -7.830955 | -1.441951 | 12.077147 |
| Ti | -7.355770 | -1.100623 | 13.828783 |
| O  | -8.907015 | -0.294585 | 14.518067 |
| O  | -5.973428 | 0.409476  | 10.202673 |
| O  | -3.713688 | -2.932520 | 9.905909  |
| O  | -3.347242 | -3.631545 | 14.722797 |
| O  | -3.336484 | 0.117478  | 14.518230 |
| Ti | -4.160577 | -1.851804 | 14.622729 |
| O  | -4.164673 | -1.599124 | 12.612560 |
| O  | -3.132715 | 0.130711  | 10.199993 |
| Ti | -4.445602 | -1.273871 | 10.825586 |
| O  | -6.219830 | -2.169122 | 10.234224 |
| O  | -2.920422 | 3.019716  | 10.076582 |
| O  | -3.050062 | 2.878038  | 14.489318 |
| O  | -0.293948 | -0.185241 | 14.348271 |
| Ti | -1.584957 | 1.166680  | 14.144916 |
| O  | -1.671870 | 1.398595  | 12.287206 |
| O  | -0.054166 | 0.052455  | 10.194257 |
| Ti | -1.419522 | 1.337953  | 10.426739 |
| O  | 2.866763  | 2.639681  | 10.158423 |
| Ti | 4.054940  | 1.183804  | 10.266069 |

|    |           |           |           |
|----|-----------|-----------|-----------|
| O  | 4.205624  | 0.917820  | 12.128637 |
| O  | 2.724635  | 2.428959  | 14.183880 |
| Ti | 3.986723  | 1.040309  | 13.971345 |
| O  | 5.424060  | -0.691604 | 14.460358 |
| O  | 5.553108  | -0.626736 | 9.973185  |
| O  | 5.855176  | 2.178173  | 9.902379  |
| O  | 5.751495  | 2.058129  | 14.340673 |
| O  | 11.490148 | -1.596723 | 14.446229 |
| Ti | 9.702498  | -2.443400 | 14.099600 |
| O  | 10.163718 | -2.666542 | 12.280278 |
| O  | 11.622498 | -1.447548 | 9.881105  |
| Ti | 9.883958  | -2.259555 | 10.449597 |
| O  | 8.704575  | -4.035019 | 14.737708 |
| O  | 8.383267  | -1.132907 | 14.215920 |
| Ti | 7.178162  | 0.335339  | 14.045130 |
| O  | 7.076877  | 0.595370  | 12.192324 |
| O  | 8.660764  | -0.868957 | 10.292345 |
| Ti | 7.264858  | 0.455196  | 10.339904 |
| Ti | 1.086073  | -1.424057 | 10.284666 |
| O  | 1.070842  | -1.747998 | 12.154389 |
| Ti | 0.957647  | -1.570334 | 13.982570 |
| Ti | -2.069246 | -3.903527 | 10.170492 |
| O  | -0.553544 | -3.010693 | 14.256188 |
| O  | -0.878254 | -5.729175 | 14.348915 |
| O  | -2.437002 | -4.414156 | 11.953331 |
| Ti | -1.961053 | -4.348851 | 13.740992 |
| O  | -0.362624 | -2.935374 | 10.137246 |
| Ti | 3.975851  | -6.317756 | 13.571773 |
| O  | 3.905136  | -7.731774 | 12.225930 |
| Ti | 4.048182  | -6.542241 | 10.794544 |
| O  | 3.991725  | -5.090320 | 12.076451 |
| O  | 2.241149  | -6.223051 | 9.985963  |
| O  | 2.358317  | -6.204023 | 14.500300 |
| O  | 2.309917  | -3.256114 | 14.520207 |
| Ti | 0.941231  | -4.944230 | 14.313665 |
| O  | 0.911453  | -4.709103 | 12.352682 |
| O  | 2.448784  | -3.295078 | 9.961354  |
| Ti | 1.037277  | -4.710677 | 10.505959 |
| O  | -0.809520 | -5.536564 | 10.004937 |
| O  | 2.855348  | -0.485706 | 9.965300  |
| O  | 2.669484  | -0.515866 | 14.380933 |
| Ti | 6.843943  | -4.851217 | 14.315756 |
| O  | 7.456807  | -5.037616 | 12.497039 |
| O  | 8.834440  | -3.890069 | 10.112790 |
| Ti | 7.093657  | -4.675081 | 10.700495 |
| O  | 5.949742  | -6.298342 | 10.297027 |
| O  | 5.634896  | -6.368812 | 14.374766 |
| O  | 5.597274  | -3.443280 | 14.314020 |
| Ti | 4.085944  | -2.297886 | 14.074230 |
| O  | 3.905255  | -2.045262 | 12.228331 |
| O  | 5.876760  | -3.283858 | 10.476303 |
| Ti | 4.238285  | -2.275905 | 10.373480 |



|    |           |           |           |
|----|-----------|-----------|-----------|
| Ti | 0.082281  | 11.139820 | 16.258084 |
| O  | -0.530492 | 11.327657 | 18.076743 |
| O  | -1.907953 | 10.178188 | 20.460986 |
| Ti | -0.167519 | 10.963895 | 19.873234 |
| O  | 0.977560  | 12.586194 | 20.276617 |
| O  | 1.292471  | 12.657016 | 16.198681 |
| O  | 1.327498  | 9.730645  | 16.260215 |
| Ti | 2.838176  | 8.584558  | 16.499224 |
| O  | 3.018208  | 8.324091  | 18.345362 |
| O  | 1.048582  | 9.571691  | 20.097870 |
| Ti | 2.686306  | 8.562272  | 20.200301 |
| O  | 4.069341  | 6.771489  | 20.607683 |
| O  | 4.254559  | 6.802712  | 16.192866 |
| Ti | 2.951215  | 12.606127 | 17.001755 |
| O  | 3.023337  | 14.019482 | 18.348466 |
| Ti | 2.879139  | 12.829563 | 19.778716 |
| O  | 2.934432  | 11.378619 | 18.496885 |
| O  | 4.685008  | 12.508930 | 20.587879 |
| O  | 4.568461  | 12.491638 | 16.073422 |
| O  | 4.614398  | 9.542627  | 16.053415 |
| Ti | 5.983957  | 11.229870 | 16.259876 |
| O  | 6.014082  | 10.994620 | 18.220642 |
| O  | 4.475924  | 9.580963  | 20.612537 |
| Ti | 5.888684  | 10.995650 | 20.067615 |
| O  | 7.735595  | 11.820631 | 20.569816 |
| O  | 7.286721  | 9.220891  | 20.436238 |
| O  | 7.478394  | 9.296219  | 16.317286 |
| O  | 7.803653  | 12.014721 | 16.225608 |
| O  | 9.361403  | 10.696409 | 18.622425 |
| Ti | 8.885601  | 10.634106 | 16.834558 |
| Ti | 8.994756  | 10.186983 | 20.405695 |
| Ti | 5.838189  | 7.710154  | 20.289043 |
| O  | 5.851997  | 8.033490  | 18.419109 |
| Ti | 5.966644  | 7.856697  | 16.591108 |
| O  | -1.778529 | 10.323154 | 15.836849 |
| O  | 7.219139  | 6.471878  | 16.226501 |
| Ti | 8.509246  | 5.119524  | 16.429349 |
| O  | 8.596381  | 4.886351  | 18.286818 |
| O  | 6.981857  | 6.236139  | 20.380037 |
| Ti | 8.345594  | 4.949240  | 20.147450 |
| O  | 9.845502  | 3.266868  | 20.498898 |
| O  | 9.973600  | 3.408066  | 16.083887 |
| O  | 10.642829 | 9.220937  | 20.669414 |
| O  | 10.273496 | 9.916700  | 15.854730 |
| O  | 10.261069 | 6.168870  | 16.056924 |
| Ti | 11.086637 | 8.137260  | 15.953933 |
| O  | 11.093083 | 7.882879  | 17.964781 |
| O  | 10.059391 | 6.155571  | 20.374342 |
| Ti | 11.373652 | 7.561434  | 19.752236 |
| O  | 13.149231 | 8.455851  | 20.342937 |
| O  | 12.898681 | 5.876884  | 20.371610 |
| O  | 13.311365 | 5.714504  | 15.996200 |

|    |           |          |           |
|----|-----------|----------|-----------|
| O  | 13.034460 | 8.554815 | 16.097644 |
| O  | 14.757486 | 7.725793 | 18.498470 |
| Ti | 14.281103 | 7.383961 | 16.747314 |
| O  | 15.832400 | 6.579612 | 16.056624 |
| Ti | 14.515607 | 6.966031 | 20.227024 |
| O  | 16.015440 | 5.773989 | 20.116055 |
| Ti | 15.830433 | 4.232612 | 19.052985 |
| Ti | 15.475075 | 4.665342 | 16.252353 |
| O  | 15.642434 | 2.693908 | 20.176743 |
| Ti | 13.979468 | 1.487406 | 19.807631 |
| O  | 14.465957 | 1.189821 | 17.991998 |
| O  | 15.321993 | 2.800060 | 15.461887 |
| Ti | 13.874172 | 1.622252 | 16.235332 |
| O  | 14.335933 | 4.529136 | 17.929662 |
| O  | 12.619487 | 2.763301 | 19.851480 |
| Ti | 11.536818 | 4.304713 | 20.092804 |
| O  | 16.904524 | 4.202130 | 17.517918 |
| O  | 11.480379 | 5.044301 | 18.323626 |
| O  | 12.468574 | 2.803645 | 16.322021 |
| Ti | 11.683982 | 4.584368 | 16.527757 |
| Ti | -2.776865 | 8.731723 | 16.474344 |
| O  | -3.238405 | 8.954933 | 18.293386 |
| O  | -4.695682 | 7.734726 | 20.693018 |
| Ti | -2.957813 | 8.547657 | 20.124081 |
| O  | -1.458534 | 7.421471 | 16.359651 |
| Ti | -0.254668 | 5.951464 | 16.529048 |
| O  | -0.152401 | 5.690161 | 18.381728 |
| O  | -1.735154 | 7.156478 | 20.282380 |
| Ti | -0.340151 | 5.831788 | 20.233876 |
| O  | 1.069254  | 4.109194 | 20.672065 |
| O  | 1.172470  | 4.228777 | 16.232625 |
| O  | 1.500446  | 6.977794 | 16.114306 |
| O  | 1.371262  | 6.913643 | 20.600519 |
| Ti | 2.869783  | 5.102228 | 20.308213 |
| O  | 2.718865  | 5.367377 | 18.445320 |
| Ti | 2.937418  | 5.246382 | 16.602511 |
| Ti | -7.724910 | 3.220571 | 17.208332 |
| Ti | -7.191838 | 2.875767 | 20.188856 |
| O  | -6.919102 | 4.833950 | 16.598277 |
| Ti | -5.473013 | 6.243382 | 16.784728 |
| O  | -6.134301 | 6.641667 | 18.521590 |
| O  | -7.117292 | 4.783117 | 20.867918 |
| Ti | -5.662307 | 6.074453 | 20.247138 |
| O  | -6.326228 | 2.135647 | 18.324259 |
| O  | -4.564078 | 7.884223 | 16.128126 |
| O  | -4.126504 | 4.964381 | 16.869982 |
| Ti | -3.293749 | 3.265801 | 16.609252 |
| O  | -8.493432 | 3.542510 | 18.852648 |
| O  | -3.224686 | 2.635970 | 18.410369 |
| O  | -4.365160 | 4.767440 | 20.202407 |
| Ti | -3.345083 | 3.091408 | 20.198315 |
| Ti | -6.255458 | 0.528514 | 16.760988 |

|    |           |           |           |
|----|-----------|-----------|-----------|
| O  | -8.023858 | 1.422163  | 16.396375 |
| O  | -5.132996 | 2.059123  | 20.562350 |
| O  | -4.952757 | -0.766863 | 20.644849 |
| O  | -6.655271 | -0.582436 | 18.243610 |
| Ti | -6.181193 | 0.314734  | 19.806276 |
| O  | -7.749286 | 1.075298  | 20.561998 |
| O  | -4.635429 | 1.693876  | 16.381167 |
| O  | -2.285019 | -1.662322 | 16.083557 |
| O  | -2.108861 | -2.057156 | 20.925909 |
| O  | -1.977244 | 1.415248  | 20.698690 |
| Ti | -3.034042 | -0.403534 | 20.680006 |
| O  | -2.945809 | -0.205518 | 18.706109 |
| O  | -1.787072 | 1.453633  | 16.374025 |
| Ti | -3.106024 | -0.011213 | 16.876192 |
| O  | -4.874633 | -0.901649 | 16.361252 |
| O  | -1.555721 | 4.323772  | 16.252909 |
| O  | -1.661257 | 4.228614  | 20.642591 |
| O  | 1.118299  | 1.131412  | 20.567750 |
| Ti | -0.194072 | 2.450225  | 20.391300 |
| O  | -0.329723 | 2.715194  | 18.528778 |
| O  | 1.284251  | 1.377587  | 16.436068 |
| Ti | -0.098343 | 2.643688  | 16.679697 |
| O  | 4.200524  | 3.858547  | 16.389371 |
| Ti | 5.484665  | 2.492835  | 16.505314 |
| O  | 5.687409  | 2.369121  | 18.357455 |
| O  | 4.058136  | 3.646706  | 20.416491 |
| Ti | 5.376175  | 2.281845  | 20.199997 |
| O  | 6.839220  | 0.561007  | 20.619215 |
| O  | 7.031923  | 0.601039  | 16.223669 |
| O  | 7.268241  | 3.459790  | 16.108848 |
| O  | 7.112853  | 3.352975  | 20.571756 |
| O  | 12.984366 | -0.117596 | 20.361176 |
| Ti | 11.247803 | -1.053737 | 20.111072 |
| O  | 11.693724 | -1.459960 | 18.304842 |
| O  | 13.000985 | -0.132049 | 15.864695 |
| Ti | 11.283205 | -0.980793 | 16.537063 |
| O  | 10.199355 | -2.649698 | 20.678702 |
| O  | 9.931408  | 0.259938  | 20.178832 |
| Ti | 8.567209  | 1.604080  | 20.239554 |
| O  | 8.489503  | 1.936722  | 18.382189 |
| O  | 10.089197 | 0.438337  | 16.466534 |
| Ti | 8.713170  | 1.781967  | 16.552232 |
| Ti | 2.427703  | -0.088131 | 16.553264 |
| O  | 2.387588  | -0.451350 | 18.412980 |
| Ti | 2.345760  | -0.296023 | 20.254509 |
| Ti | -0.678134 | -2.667120 | 16.416971 |
| O  | 0.749818  | -1.638603 | 20.633273 |
| O  | 0.253902  | -4.325564 | 20.685394 |
| O  | -1.090565 | -3.026145 | 18.223524 |
| Ti | -0.687522 | -2.872280 | 20.031099 |
| O  | 0.980415  | -1.613536 | 16.336522 |
| Ti | 5.243271  | -4.595513 | 20.475815 |

|    |           |           |           |
|----|-----------|-----------|-----------|
| O  | 5.581049  | -5.688884 | 18.958690 |
| Ti | 5.594132  | -4.365305 | 17.598237 |
| O  | 5.379907  | -3.067642 | 19.185830 |
| O  | 3.974717  | -4.498967 | 16.711412 |
| O  | 3.416718  | -5.027811 | 20.805605 |
| O  | 3.618766  | -1.997368 | 20.727070 |
| Ti | 2.130223  | -3.675095 | 20.610345 |
| O  | 2.104015  | -3.332265 | 18.672336 |
| O  | 3.812750  | -1.862206 | 16.308664 |
| Ti | 2.410541  | -3.366934 | 16.835116 |
| O  | 0.649394  | -4.257558 | 16.270160 |
| O  | 4.206592  | 0.876305  | 16.221871 |
| O  | 4.094206  | 0.701331  | 20.631094 |
| Ti | 8.396293  | -3.431005 | 20.460739 |
| O  | 8.624830  | -3.923227 | 18.623067 |
| O  | 9.989011  | -2.519266 | 16.339309 |
| Ti | 8.383763  | -3.500421 | 16.787019 |
| O  | 7.065417  | -5.030924 | 16.427818 |
| O  | 7.060834  | -4.804090 | 21.241920 |
| O  | 7.225113  | -2.006603 | 20.641702 |
| Ti | 5.484556  | -1.117920 | 20.225407 |
| O  | 5.385949  | -0.392230 | 18.461343 |
| O  | 6.761483  | -2.433116 | 16.881292 |
| Ti | 5.610358  | -0.836147 | 16.666975 |
| Ti | 1.312749  | 12.255537 | 22.377193 |
| O  | 0.869554  | 12.744945 | 24.141634 |
| O  | -0.600632 | 11.377144 | 26.510479 |
| Ti | 1.127378  | 12.067480 | 25.882726 |
| O  | 2.602420  | 13.445374 | 26.194021 |
| O  | 2.725365  | 13.672347 | 21.787006 |
| O  | 2.565583  | 10.887985 | 22.344721 |
| Ti | 4.244758  | 9.951848  | 22.878874 |
| O  | 4.417226  | 9.448155  | 24.691072 |
| O  | 2.213375  | 10.594280 | 25.932635 |
| Ti | 3.926740  | 9.733302  | 26.507814 |
| O  | 5.358851  | 7.931518  | 26.935579 |
| O  | 5.622318  | 8.130601  | 22.462502 |
| Ti | 4.521707  | 13.466153 | 22.542513 |
| O  | 4.394064  | 14.614894 | 24.105578 |
| Ti | 4.317507  | 13.279721 | 25.396534 |
| O  | 4.367150  | 11.980119 | 23.935581 |
| O  | 5.803341  | 13.481602 | 26.673409 |
| O  | 6.343466  | 13.894182 | 22.200023 |
| O  | 6.113248  | 10.822490 | 22.376106 |
| Ti | 7.583947  | 12.522432 | 22.500260 |
| O  | 7.351382  | 12.201838 | 24.482219 |
| O  | 5.862917  | 10.691880 | 26.742199 |
| Ti | 7.309041  | 12.092896 | 26.295897 |
| O  | 9.105143  | 12.884543 | 26.863618 |
| O  | 8.546858  | 10.337444 | 26.847546 |
| O  | 8.917613  | 10.543822 | 22.563021 |
| O  | 9.392649  | 13.237283 | 22.699544 |

|    |           |           |           |
|----|-----------|-----------|-----------|
| O  | 10.634529 | 11.522073 | 25.044351 |
| Ti | 10.366701 | 11.743828 | 23.232801 |
| Ti | 10.353349 | 11.197828 | 26.915636 |
| Ti | 7.119180  | 8.807111  | 26.553718 |
| O  | 7.354682  | 9.059689  | 24.683899 |
| Ti | 7.358223  | 9.133754  | 22.849787 |
| O  | -0.474990 | 11.489675 | 22.055907 |
| O  | 8.653527  | 7.838220  | 22.281920 |
| Ti | 9.872160  | 6.442034  | 22.620252 |
| O  | 9.845853  | 6.336861  | 24.507307 |
| O  | 8.393831  | 7.492259  | 26.858967 |
| Ti | 9.857602  | 6.358984  | 26.379248 |
| O  | 11.300037 | 4.729215  | 26.805818 |
| O  | 11.275144 | 4.687856  | 22.217292 |
| O  | 12.194471 | 10.545191 | 27.000171 |
| O  | 11.754627 | 11.172176 | 22.167494 |
| O  | 11.680879 | 7.419724  | 22.284297 |
| Ti | 12.465132 | 9.362364  | 22.072920 |
| O  | 12.589308 | 9.138943  | 24.088390 |
| O  | 11.277334 | 7.838788  | 26.648686 |
| Ti | 12.748792 | 8.877656  | 25.888482 |
| O  | 14.504728 | 9.608038  | 26.812525 |
| O  | 14.080083 | 7.253087  | 26.022632 |
| O  | 14.706533 | 6.876327  | 22.396454 |
| O  | 14.474195 | 9.722903  | 22.124955 |
| O  | 16.124525 | 9.283466  | 24.641513 |
| Ti | 15.631287 | 8.629852  | 22.965618 |
| O  | 17.178101 | 7.765628  | 22.238570 |
| Ti | 15.775116 | 8.211473  | 26.160153 |
| O  | 17.639281 | 7.486250  | 26.578130 |
| Ti | 17.584600 | 5.638391  | 25.746864 |
| Ti | 16.973774 | 5.998849  | 22.954823 |
| O  | 16.869050 | 3.920719  | 26.206457 |
| Ti | 15.402711 | 2.577473  | 25.826010 |
| O  | 15.876849 | 2.209630  | 24.068830 |
| O  | 16.761900 | 4.302169  | 22.278963 |
| Ti | 15.366217 | 2.927670  | 22.352809 |
| O  | 16.052877 | 6.426244  | 24.722976 |
| O  | 13.954424 | 3.732135  | 25.803888 |
| Ti | 13.210194 | 5.402733  | 26.356559 |
| O  | 18.506434 | 5.593804  | 24.157924 |
| O  | 12.641013 | 5.848419  | 24.551364 |
| O  | 13.939609 | 4.100429  | 22.420423 |
| Ti | 12.973226 | 5.760342  | 22.759931 |
| Ti | -1.507176 | 9.905265  | 22.604112 |
| O  | -2.016015 | 10.234033 | 24.405580 |
| O  | -3.331520 | 8.799793  | 26.706579 |
| Ti | -1.625096 | 9.722933  | 26.160622 |
| O  | -0.209720 | 8.567043  | 22.685442 |
| Ti | 1.177407  | 7.258315  | 22.737374 |
| O  | 1.301307  | 6.823270  | 24.573503 |
| O  | -0.439163 | 8.297270  | 26.300549 |

|    |           |           |           |
|----|-----------|-----------|-----------|
| Ti | 0.996936  | 7.014531  | 26.390562 |
| O  | 2.407908  | 5.279910  | 26.921214 |
| O  | 2.608020  | 5.465997  | 22.479036 |
| O  | 2.914875  | 8.287569  | 22.427183 |
| O  | 2.699446  | 8.073819  | 26.848947 |
| Ti | 4.155969  | 6.279386  | 26.602225 |
| O  | 4.140330  | 6.469178  | 24.723873 |
| Ti | 4.344138  | 6.539071  | 22.873497 |
| Ti | -6.659369 | 4.686609  | 22.960422 |
| Ti | -6.157709 | 4.301013  | 25.765074 |
| O  | -5.976950 | 6.401708  | 22.432088 |
| Ti | -4.264716 | 7.428955  | 22.828786 |
| O  | -4.849748 | 7.522920  | 24.667415 |
| O  | -5.725994 | 5.672738  | 27.013126 |
| Ti | -4.256112 | 7.086386  | 26.377926 |
| O  | -5.134702 | 3.980530  | 24.102399 |
| O  | -3.287849 | 9.026280  | 22.317855 |
| O  | -2.954619 | 6.117250  | 22.869182 |
| Ti | -1.857014 | 4.567912  | 22.785746 |
| O  | -7.580885 | 4.878228  | 24.599105 |
| O  | -1.873208 | 3.855332  | 24.570682 |
| O  | -3.011255 | 5.738168  | 26.449319 |
| Ti | -1.913677 | 4.109015  | 26.393194 |
| Ti | -4.926720 | 2.032577  | 22.818091 |
| O  | -6.733145 | 2.808751  | 22.332460 |
| O  | -3.477341 | 2.900024  | 26.892660 |
| O  | -3.775859 | 0.158687  | 26.976357 |
| O  | -5.187623 | 1.136056  | 24.471974 |
| Ti | -4.738373 | 1.538130  | 26.231178 |
| O  | -6.337509 | 2.625818  | 26.515136 |
| O  | -3.278673 | 3.077581  | 22.447610 |
| O  | -0.698639 | -0.227258 | 22.635743 |
| O  | -0.701902 | -0.768418 | 27.084056 |
| O  | -0.531518 | 2.454329  | 26.909825 |
| Ti | -1.857034 | 0.720819  | 26.868448 |
| O  | -1.927320 | 1.098472  | 24.955616 |
| O  | -0.433708 | 2.760043  | 22.564307 |
| Ti | -1.770836 | 1.285577  | 23.091603 |
| O  | -3.583357 | 0.528714  | 22.460651 |
| O  | -0.147991 | 5.606387  | 22.465823 |
| O  | -0.313962 | 5.381312  | 26.814739 |
| O  | 2.499633  | 2.282211  | 26.712018 |
| Ti | 1.228653  | 3.632206  | 26.565100 |
| O  | 0.964698  | 3.866650  | 24.720358 |
| O  | 2.682729  | 2.576813  | 22.709665 |
| Ti | 1.338223  | 3.890850  | 22.876304 |
| O  | 5.619253  | 5.156320  | 22.595384 |
| Ti | 6.863512  | 3.745143  | 22.745866 |
| O  | 6.976468  | 3.572088  | 24.621991 |
| O  | 5.474323  | 4.945364  | 26.794527 |
| Ti | 6.874549  | 3.712828  | 26.476598 |
| O  | 8.339786  | 1.983671  | 26.807628 |

|    |           |           |           |
|----|-----------|-----------|-----------|
| O  | 8.385079  | 1.951020  | 22.407749 |
| O  | 8.628329  | 4.773638  | 22.361386 |
| O  | 8.598017  | 4.746853  | 26.826564 |
| O  | 14.520112 | 0.984626  | 26.587563 |
| Ti | 12.695306 | 0.328328  | 26.152673 |
| O  | 13.096147 | -0.017513 | 24.344794 |
| O  | 14.463095 | 1.191581  | 21.889678 |
| Ti | 12.743705 | 0.391341  | 22.531270 |
| O  | 11.560406 | -1.208393 | 26.665697 |
| O  | 11.475437 | 1.732936  | 26.326764 |
| Ti | 10.091580 | 3.045528  | 26.476912 |
| O  | 9.902405  | 3.283550  | 24.604746 |
| O  | 11.459341 | 1.736720  | 22.543950 |
| Ti | 10.069532 | 3.055419  | 22.765070 |
| Ti | 3.902220  | 1.148832  | 22.801694 |
| O  | 3.952947  | 0.819972  | 24.665677 |
| Ti | 3.881566  | 1.006046  | 26.501643 |
| Ti | 0.815766  | -1.358220 | 22.799271 |
| O  | 2.379307  | -0.400740 | 26.959972 |
| O  | 1.889566  | -3.017465 | 26.952277 |
| O  | 0.469693  | -1.778974 | 24.611275 |
| Ti | 0.869385  | -1.556807 | 26.399236 |
| O  | 2.493000  | -0.371357 | 22.608224 |
| Ti | 6.845814  | -3.619391 | 26.046693 |
| O  | 6.985203  | -5.068130 | 24.760509 |
| Ti | 7.008790  | -3.953464 | 23.241487 |
| O  | 6.931537  | -2.462882 | 24.511877 |
| O  | 5.154480  | -3.674548 | 22.509475 |
| O  | 5.096499  | -3.738258 | 26.712136 |
| O  | 5.253835  | -0.680705 | 26.866175 |
| Ti | 3.760522  | -2.389144 | 26.751505 |
| O  | 3.718291  | -2.078805 | 24.824090 |
| O  | 5.310236  | -0.754959 | 22.443246 |
| Ti | 3.915455  | -2.190701 | 22.981724 |
| O  | 2.051573  | -2.995411 | 22.565630 |
| O  | 5.653507  | 2.084374  | 22.437138 |
| O  | 5.571930  | 2.088494  | 26.896898 |
| Ti | 9.838533  | -2.134023 | 26.390493 |
| O  | 10.274868 | -2.636034 | 24.653512 |
| O  | 11.695495 | -1.294782 | 22.262027 |
| Ti | 9.991478  | -2.096992 | 22.836737 |
| O  | 8.857433  | -3.739259 | 22.570907 |
| O  | 8.488536  | -3.560215 | 27.073241 |
| O  | 8.503975  | -0.819298 | 26.560521 |
| Ti | 7.019527  | 0.400287  | 26.432287 |
| O  | 6.777408  | 0.625449  | 24.610770 |
| O  | 8.760848  | -0.713551 | 22.822287 |
| Ti | 7.101027  | 0.282876  | 22.772998 |
| Ti | 2.734458  | 13.062590 | 28.391171 |
| O  | 2.558837  | 12.564193 | 30.252391 |
| O  | 0.967805  | 12.453932 | 32.829494 |
| Ti | 2.672210  | 12.799582 | 32.106079 |

|    |           |           |           |
|----|-----------|-----------|-----------|
| O  | 3.571472  | 14.476101 | 32.148348 |
| O  | 3.734648  | 14.679469 | 28.242170 |
| O  | 3.868394  | 11.605912 | 27.787755 |
| Ti | 5.497893  | 11.063240 | 28.956870 |
| O  | 5.476975  | 10.548595 | 30.848394 |
| O  | 4.004845  | 11.823937 | 32.996650 |
| Ti | 5.389202  | 10.559102 | 32.669435 |
| O  | 6.775935  | 9.002859  | 33.339614 |
| O  | 6.861336  | 9.309192  | 28.762853 |
| Ti | 5.607146  | 14.551473 | 28.583396 |
| O  | 5.582531  | 15.670390 | 30.163387 |
| Ti | 5.292974  | 14.337866 | 31.422979 |
| O  | 5.402067  | 12.984828 | 29.925597 |
| O  | 6.613696  | 14.149133 | 32.702364 |
| O  | 7.445643  | 14.945018 | 28.196370 |
| O  | 7.385365  | 11.938775 | 28.691658 |
| Ti | 8.776959  | 13.743405 | 28.709243 |
| O  | 8.463289  | 13.375002 | 30.636193 |
| O  | 7.185623  | 11.464811 | 33.045448 |
| Ti | 8.176606  | 13.065495 | 32.429889 |
| O  | 9.707725  | 13.644421 | 33.478455 |
| O  | 9.668903  | 11.323108 | 32.168988 |
| O  | 10.112047 | 11.833166 | 29.077762 |
| O  | 10.542385 | 14.558221 | 28.844463 |
| O  | 11.856884 | 13.403533 | 31.348159 |
| Ti | 11.540182 | 13.136915 | 29.510454 |
| Ti | 11.017434 | 12.511123 | 32.736926 |
| Ti | 8.441308  | 9.763235  | 32.618310 |
| O  | 8.430664  | 9.364217  | 30.803297 |
| Ti | 8.605672  | 10.291935 | 29.161881 |
| O  | 0.850295  | 12.689790 | 28.034132 |
| O  | 10.297224 | 9.481991  | 28.468634 |
| Ti | 11.274357 | 7.876532  | 28.889760 |
| O  | 10.906800 | 7.647737  | 30.790276 |
| O  | 9.822807  | 8.799726  | 33.472267 |
| Ti | 10.835703 | 7.451579  | 32.642403 |
| O  | 12.193558 | 5.850528  | 33.281058 |
| O  | 12.631307 | 6.277253  | 28.249211 |
| O  | 12.312911 | 11.310665 | 33.368796 |
| O  | 12.950933 | 12.467790 | 28.592982 |
| O  | 13.222160 | 8.602830  | 28.997721 |
| Ti | 13.707944 | 10.627291 | 28.501141 |
| O  | 13.422020 | 10.499116 | 30.564692 |
| O  | 12.756850 | 8.238778  | 32.656174 |
| Ti | 13.300380 | 10.073054 | 32.329247 |
| O  | 15.042199 | 9.962407  | 33.180711 |
| O  | 14.858768 | 7.801679  | 31.156862 |
| O  | 15.982568 | 8.201000  | 28.460192 |
| O  | 15.630144 | 11.173243 | 28.573676 |
| O  | 16.975286 | 10.088687 | 30.958618 |
| Ti | 16.826991 | 9.930576  | 29.104474 |
| O  | 18.444249 | 9.137399  | 28.631093 |



|    |           |           |           |
|----|-----------|-----------|-----------|
| Ti | 16.107551 | 8.923304  | 32.104919 |
| O  | 17.387957 | 7.657774  | 32.638805 |
| Ti | 17.783392 | 6.282527  | 31.413941 |
| Ti | 17.973707 | 7.224217  | 28.614344 |
| O  | 17.861211 | 4.647385  | 32.301034 |
| Ti | 16.111638 | 3.846354  | 32.099478 |
| O  | 16.154299 | 3.780491  | 30.250641 |
| O  | 18.072018 | 5.361577  | 27.853959 |
| Ti | 16.366633 | 4.367662  | 28.387122 |
| O  | 16.466619 | 6.297738  | 29.902463 |
| O  | 15.080640 | 5.298480  | 32.788471 |
| Ti | 13.674174 | 6.340853  | 32.129514 |
| O  | 19.064359 | 6.823922  | 30.196805 |
| O  | 13.331691 | 5.614781  | 30.442724 |
| O  | 14.979238 | 5.538371  | 27.772679 |
| Ti | 14.390152 | 6.963766  | 29.206607 |
| Ti | -0.106297 | 11.034715 | 28.654588 |
| O  | -0.319685 | 11.168799 | 30.551648 |
| O  | -1.691998 | 10.213812 | 32.954248 |
| Ti | 0.009158  | 10.872071 | 32.370364 |
| O  | 1.191718  | 9.715837  | 28.680729 |
| Ti | 2.484419  | 8.354333  | 29.043588 |
| O  | 2.502649  | 8.114118  | 30.939989 |
| O  | 1.224588  | 9.587816  | 33.001710 |
| Ti | 2.493789  | 8.183556  | 32.795332 |
| O  | 3.876083  | 6.637112  | 33.565156 |
| O  | 3.882259  | 6.618633  | 28.840001 |
| O  | 4.214608  | 9.361776  | 28.775872 |
| O  | 4.174397  | 9.118266  | 33.288387 |
| Ti | 5.576349  | 7.441686  | 32.939964 |
| O  | 5.511595  | 7.463557  | 31.088304 |
| Ti | 5.651149  | 7.639817  | 29.188753 |
| Ti | -5.028168 | 5.601399  | 29.109515 |
| Ti | -4.080212 | 5.765121  | 31.851547 |
| O  | -4.560711 | 7.423722  | 28.477251 |
| Ti | -2.906861 | 8.574678  | 28.802281 |
| O  | -3.275850 | 9.226733  | 30.531028 |
| O  | -3.654673 | 7.378753  | 32.677332 |
| Ti | -2.387352 | 8.693811  | 32.084860 |
| O  | -3.281347 | 5.242005  | 30.090995 |
| O  | -1.867183 | 10.174841 | 28.317077 |
| O  | -1.628257 | 7.218847  | 29.002771 |
| Ti | -0.524055 | 5.692248  | 28.906930 |
| O  | -5.713485 | 5.970078  | 30.822613 |
| O  | 0.611899  | 5.419854  | 30.564903 |
| O  | -0.898430 | 7.576244  | 31.939480 |
| Ti | -0.047328 | 5.880540  | 32.241773 |
| Ti | -3.308656 | 3.055387  | 29.237464 |
| O  | -5.055371 | 3.701240  | 28.831142 |
| O  | -1.753735 | 4.935579  | 32.301278 |
| O  | -1.509848 | 2.353955  | 33.648531 |
| O  | -3.302412 | 2.380450  | 31.033438 |

|    |           |           |           |
|----|-----------|-----------|-----------|
| Ti | -2.709341 | 3.275743  | 32.542256 |
| O  | -4.274925 | 4.264428  | 32.997167 |
| O  | -1.661752 | 4.057478  | 28.713482 |
| O  | 0.913172  | 0.690245  | 28.961938 |
| O  | 1.255793  | 0.879861  | 33.365324 |
| O  | 1.069127  | 4.046080  | 33.168780 |
| Ti | 0.238588  | 2.380427  | 32.849850 |
| O  | -0.167086 | 2.391310  | 31.036265 |
| O  | 0.962264  | 3.822463  | 28.734234 |
| Ti | -0.187635 | 2.190426  | 29.099398 |
| O  | -2.088015 | 1.464037  | 28.791266 |
| O  | 1.187298  | 6.793980  | 28.594826 |
| O  | 1.373518  | 6.591521  | 33.382067 |
| O  | 4.066671  | 3.711849  | 33.647937 |
| Ti | 2.895646  | 5.016710  | 32.983677 |
| O  | 3.107826  | 5.038624  | 31.170782 |
| O  | 3.822395  | 3.678554  | 28.892533 |
| Ti | 2.554419  | 5.071463  | 29.287239 |
| O  | 7.013427  | 6.390299  | 28.876199 |
| Ti | 8.376578  | 5.092107  | 29.076635 |
| O  | 8.112958  | 4.908330  | 30.983378 |
| O  | 6.802699  | 6.144720  | 33.515248 |
| Ti | 8.055328  | 4.913224  | 32.830443 |
| O  | 9.539978  | 3.318304  | 33.369730 |
| O  | 9.867386  | 3.401724  | 28.682386 |
| O  | 10.094387 | 6.174526  | 28.744104 |
| O  | 9.717272  | 5.935456  | 33.141186 |
| O  | 15.451513 | 2.296784  | 32.888525 |
| Ti | 13.719246 | 1.622604  | 32.365662 |
| O  | 14.037036 | 1.428080  | 30.546536 |
| O  | 15.817785 | 2.511431  | 28.045097 |
| Ti | 14.067229 | 1.735210  | 28.642975 |
| O  | 12.846110 | 0.083565  | 33.050156 |
| O  | 12.544160 | 2.981449  | 32.876828 |
| Ti | 11.107437 | 4.224261  | 32.693548 |
| O  | 11.000311 | 4.319125  | 30.868884 |
| O  | 12.932113 | 3.225047  | 28.606121 |
| Ti | 11.619938 | 4.558086  | 29.046858 |
| Ti | 5.297241  | 2.572017  | 29.069124 |
| O  | 5.585586  | 2.777006  | 30.951322 |
| Ti | 5.360895  | 2.623987  | 32.775545 |
| Ti | 2.551434  | -0.262346 | 29.190873 |
| O  | 4.070875  | 1.140860  | 32.600534 |
| O  | 3.939190  | -1.344342 | 33.483862 |
| O  | 2.184320  | -0.715671 | 31.007927 |
| Ti | 2.709094  | -0.138756 | 32.687775 |
| O  | 4.094166  | 0.884964  | 28.926929 |
| Ti | 8.522760  | -2.319923 | 31.939241 |
| O  | 8.467241  | -3.814274 | 30.722938 |
| Ti | 8.485741  | -2.747606 | 29.154044 |
| O  | 8.519616  | -1.199363 | 30.401460 |
| O  | 6.683792  | -2.439551 | 28.554430 |

|    |           |           |           |
|----|-----------|-----------|-----------|
| O  | 7.013785  | -1.998071 | 32.986609 |
| O  | 6.677271  | 0.834995  | 33.285150 |
| Ti | 5.615054  | -0.704685 | 32.734688 |
| O  | 5.434062  | -0.755681 | 30.885355 |
| O  | 6.823770  | 0.678841  | 28.683208 |
| Ti | 5.617304  | -0.932582 | 29.000835 |
| O  | 3.740748  | -1.819548 | 28.766532 |
| O  | 7.130902  | 3.434106  | 28.704121 |
| O  | 7.046093  | 3.324018  | 33.501505 |
| Ti | 11.184650 | -0.623821 | 32.457818 |
| O  | 11.610601 | -0.928791 | 30.675719 |
| O  | 13.036021 | 0.068497  | 28.364825 |
| Ti | 11.300749 | -0.713416 | 28.807663 |
| O  | 10.318152 | -2.461734 | 28.487044 |
| O  | 10.161331 | -2.203912 | 32.841598 |
| O  | 9.853191  | 0.572283  | 33.045951 |
| Ti | 8.396883  | 1.761900  | 32.777402 |
| O  | 8.361574  | 1.873029  | 30.938124 |
| O  | 10.068782 | 0.658312  | 28.697959 |
| Ti | 8.553700  | 1.777536  | 29.038264 |

48c-like 3-D (1,2,0)-mer

|    |           |           |           |
|----|-----------|-----------|-----------|
| O  | 1.273831  | 0.567986  | 2.134037  |
| O  | 1.213424  | 0.454150  | -2.644366 |
| O  | 3.066380  | 4.034801  | 1.387489  |
| O  | 2.983115  | 3.763754  | -1.692006 |
| O  | 4.299615  | 6.291346  | -0.412591 |
| Ti | 3.876803  | 5.403245  | -1.991736 |
| Ti | 3.981543  | 5.711255  | 1.335770  |
| Ti | 2.468355  | 2.150485  | 1.520549  |
| O  | 2.438521  | 1.428908  | -0.209831 |
| Ti | 2.428332  | 1.878116  | -2.018468 |
| O  | -2.432824 | -6.476666 | 2.196855  |
| O  | 0.816505  | -5.723530 | -2.608159 |
| O  | 0.500929  | -6.118436 | 1.962937  |
| O  | -0.490983 | -3.049767 | 2.001811  |
| Ti | -0.981303 | -4.977399 | 1.733027  |
| O  | -0.898255 | -4.999492 | -0.180606 |
| O  | -0.460430 | -3.024403 | -2.497231 |
| Ti | -0.823631 | -4.903839 | -2.042146 |
| O  | -2.122989 | -6.175367 | -2.758436 |
| O  | 2.309775  | -2.232380 | 2.184574  |
| Ti | 0.714672  | -1.406004 | 1.676334  |
| O  | 0.773672  | -1.429729 | -0.231262 |
| O  | 2.356616  | -2.095930 | -2.792239 |
| Ti | 0.742874  | -1.434167 | -2.103117 |
| O  | 4.031088  | 1.426018  | -2.866195 |
| Ti | 5.587666  | 0.764543  | -2.049209 |
| O  | 5.546219  | 0.792324  | -0.175002 |
| O  | 4.075093  | 1.571221  | 2.246722  |
| Ti | 5.663282  | 0.670707  | 1.730659  |
| O  | 7.681078  | -0.275624 | 2.152858  |

|    |           |           |           |
|----|-----------|-----------|-----------|
| O  | 7.452758  | -0.213287 | -2.556184 |
| O  | 5.601961  | 5.527027  | 2.246010  |
| O  | 5.522014  | 4.926412  | -2.719979 |
| O  | 6.812345  | 2.319722  | -2.383522 |
| Ti | 7.092654  | 4.219758  | -1.903014 |
| O  | 7.026912  | 4.339858  | -0.052371 |
| O  | 6.798629  | 2.428495  | 2.079566  |
| Ti | 7.197938  | 4.576982  | 1.909705  |
| O  | 8.558175  | 6.015160  | 2.004801  |
| O  | 9.259209  | 3.418187  | 1.512856  |
| O  | 9.195660  | 3.116231  | -1.830864 |
| O  | 8.400840  | 5.461626  | -2.693042 |
| O  | 10.246043 | 5.798475  | -0.455668 |
| Ti | 9.990028  | 4.804155  | -2.002075 |
| O  | 11.793158 | 4.300196  | -2.454114 |
| Ti | 10.023706 | 5.185983  | 1.299046  |
| O  | 11.798396 | 5.041307  | 1.952892  |
| Ti | 12.486535 | 3.364302  | 1.463997  |
| Ti | 12.573099 | 3.031752  | -1.335155 |
| O  | 13.066155 | 1.831312  | 2.515557  |
| Ti | 12.068594 | 0.085323  | 1.918024  |
| O  | 12.250639 | -0.146904 | 0.069038  |
| O  | 13.045891 | 1.438667  | -2.159411 |
| Ti | 11.897096 | -0.066039 | -1.802768 |
| O  | 11.326157 | 2.646815  | 0.109660  |
| O  | 12.159679 | -1.833043 | 2.323319  |
| O  | 10.385204 | 0.725942  | 2.288920  |
| Ti | 8.709644  | 1.526174  | 1.709595  |
| O  | 13.736803 | 3.651682  | 0.057124  |
| O  | 8.526175  | 0.882231  | -0.044654 |
| O  | 10.292816 | 0.592317  | -2.446974 |
| Ti | 8.602188  | 1.211174  | -1.851408 |
| Ti | 3.944250  | -2.541442 | -1.901509 |
| O  | 3.977906  | -2.353305 | -0.058885 |
| Ti | 4.067878  | -2.759625 | 1.790383  |
| Ti | 2.477176  | -6.106193 | -1.868766 |
| O  | 3.397877  | -4.746262 | 1.904796  |
| O  | 4.026277  | -7.402211 | 2.042882  |
| O  | 2.244964  | -6.820832 | -0.159663 |
| Ti | 2.332160  | -6.353866 | 1.671308  |
| O  | 3.367843  | -4.438614 | -1.694808 |
| Ti | 8.808013  | -6.043796 | 1.425369  |
| O  | 9.153559  | -7.069330 | -0.102145 |
| Ti | 8.646292  | -5.687749 | -1.347375 |
| O  | 8.166293  | -4.639581 | 0.226536  |
| O  | 7.162450  | -6.009552 | -2.390579 |
| O  | 7.081186  | -6.813687 | 2.160796  |
| O  | 5.922452  | -3.985869 | 2.070307  |
| Ti | 5.387431  | -5.915362 | 1.726261  |
| O  | 5.335992  | -5.815832 | -0.128312 |
| O  | 5.796137  | -3.610406 | -2.451124 |
| Ti | 5.341286  | -5.490175 | -1.994546 |

|    |            |           |           |
|----|------------|-----------|-----------|
| O  | 4.070634   | -6.743351 | -2.710568 |
| O  | 5.153387   | -1.131907 | -2.507301 |
| O  | 5.372367   | -1.281153 | 2.104865  |
| Ti | 10.899789  | -3.250241 | 1.651049  |
| O  | 11.319926  | -3.349587 | -0.165515 |
| O  | 11.804404  | -1.825794 | -2.462583 |
| Ti | 10.575532  | -3.164057 | -1.881077 |
| O  | 10.148443  | -4.999474 | -2.219671 |
| O  | 10.494224  | -5.194478 | 1.950738  |
| O  | 9.303016   | -2.361162 | 1.734826  |
| Ti | 7.343660   | -2.460615 | 1.795317  |
| O  | 6.947612   | -2.157240 | -0.085776 |
| O  | 8.856681   | -2.546590 | -2.237176 |
| Ti | 7.015436   | -2.086665 | -1.909211 |
| Ti | -10.287708 | 3.054710  | -1.779306 |
| O  | -10.450910 | 2.981372  | 0.125326  |
| O  | -12.069496 | 2.040928  | 2.215184  |
| Ti | -10.559363 | 3.261993  | 1.981201  |
| O  | -10.072267 | 5.133896  | 2.508286  |
| O  | -10.001783 | 4.923057  | -1.869245 |
| O  | -8.669415  | 2.572411  | -2.571704 |
| Ti | -6.930187  | 2.005628  | -2.061167 |
| O  | -7.057364  | 2.009182  | -0.217960 |
| O  | -8.934737  | 2.567470  | 2.739858  |
| Ti | -7.174879  | 2.544265  | 1.648816  |
| O  | -5.307235  | 1.424385  | 1.963007  |
| O  | -5.090580  | 1.149653  | -2.758552 |
| Ti | -8.468883  | 5.496500  | -0.955865 |
| O  | -8.967010  | 6.796178  | 0.312509  |
| Ti | -8.356656  | 5.888639  | 1.856515  |
| O  | -7.928569  | 4.326974  | 0.607689  |
| O  | -6.812528  | 6.954387  | 2.146008  |
| O  | -7.034451  | 5.892130  | -2.002316 |
| O  | -5.689658  | 3.584392  | -2.337624 |
| Ti | -5.151918  | 5.423416  | -1.738517 |
| O  | -5.022408  | 5.688653  | 0.083003  |
| O  | -5.818362  | 4.066561  | 2.072773  |
| Ti | -5.077595  | 6.260884  | 1.966997  |
| O  | -3.638754  | 7.554406  | 1.980785  |
| O  | -3.191313  | 4.895809  | 2.023030  |
| O  | -3.165520  | 4.335019  | -1.732173 |
| O  | -3.974030  | 6.643147  | -2.653913 |
| O  | -1.954983  | 6.794067  | -0.389929 |
| Ti | -2.290536  | 5.986788  | -2.041535 |
| Ti | -2.185177  | 6.496569  | 1.433707  |
| Ti | -3.987132  | 2.977613  | 1.670734  |
| O  | -3.952338  | 2.336438  | -0.109558 |
| Ti | -3.864978  | 2.476608  | -1.961267 |
| Ti | -12.493982 | -3.090252 | -1.285226 |
| Ti | -13.088062 | -3.429768 | 1.504249  |
| O  | -12.639776 | -1.428535 | -2.075433 |
| Ti | -11.886089 | 0.296586  | -1.645503 |

|    |            |           |           |
|----|------------|-----------|-----------|
| O  | -12.899744 | 0.574982  | -0.102027 |
| O  | -13.326324 | -1.558905 | 1.902759  |
| Ti | -12.322208 | 0.165227  | 1.629966  |
| O  | -11.407172 | -3.162258 | 0.354447  |
| O  | -11.732120 | 2.021275  | -2.428144 |
| O  | -10.094694 | -0.150817 | -1.587060 |
| Ti | -8.448483  | -1.160430 | -1.614686 |
| O  | -13.955459 | -3.645629 | -0.146714 |
| O  | -7.811466  | -1.062578 | 0.119497  |
| O  | -10.554567 | -0.427730 | 1.462537  |
| Ti | -8.877997  | -1.228544 | 1.835667  |
| Ti | -9.954304  | -4.626687 | -1.876985 |
| O  | -11.784678 | -4.377832 | -2.420959 |
| O  | -9.337689  | -3.192269 | 1.904065  |
| O  | -8.701515  | -5.657437 | 2.152479  |
| O  | -10.154453 | -5.620570 | -0.301690 |
| Ti | -10.345082 | -4.849933 | 1.409135  |
| O  | -12.085088 | -4.980899 | 2.207512  |
| O  | -9.444910  | -2.826245 | -1.732270 |
| O  | -5.432917  | -5.149011 | -2.711272 |
| O  | -5.685055  | -5.366983 | 1.980667  |
| O  | -6.805600  | -2.314806 | 1.992667  |
| Ti | -7.211472  | -4.253158 | 1.717873  |
| O  | -7.152090  | -4.286464 | -0.203734 |
| O  | -6.729010  | -2.372945 | -2.464490 |
| Ti | -6.935763  | -4.226422 | -2.072095 |
| O  | -8.434968  | -5.174622 | -2.809715 |
| O  | -7.389798  | 0.115129  | -2.665940 |
| O  | -7.760109  | 0.516375  | 2.064953  |
| O  | -4.211061  | -1.250408 | 1.949146  |
| Ti | -5.905058  | -0.516471 | 1.396249  |
| O  | -5.300372  | -0.633937 | -0.457192 |
| O  | -3.876426  | -1.476262 | -2.986627 |
| Ti | -5.439234  | -0.770496 | -2.281022 |
| O  | -2.259608  | 1.997048  | -2.802696 |
| Ti | -0.616783  | 1.429400  | -2.106023 |
| O  | -0.615432  | 1.506262  | -0.229385 |
| O  | -2.196621  | 2.519650  | 2.069272  |
| Ti | -0.659380  | 1.559376  | 1.673947  |
| O  | -0.506439  | 6.352963  | 2.177650  |
| O  | -0.643736  | 5.590610  | -2.770012 |
| O  | 0.607332   | 2.983959  | -2.471687 |
| Ti | 0.949648   | 4.871491  | -1.932169 |
| O  | 0.790705   | 4.995789  | -0.088868 |
| O  | 0.638244   | 3.162080  | 2.082838  |
| Ti | 1.075541   | 5.318907  | 1.831325  |
| O  | 2.493384   | 6.650082  | 1.921007  |
| O  | 2.267045   | 6.105498  | -2.654385 |
| Ti | -2.298554  | -1.919614 | -2.012819 |
| O  | -2.265924  | -1.649464 | -0.198777 |
| Ti | -2.533675  | -1.954462 | 1.679867  |
| Ti | -3.709236  | -5.500984 | -2.036059 |

|    |           |           |           |
|----|-----------|-----------|-----------|
| O  | -3.006734 | -3.943732 | 1.512474  |
| O  | -4.049692 | -6.247720 | -0.352155 |
| Ti | -3.947167 | -5.606113 | 1.397168  |
| O  | -2.935285 | -3.809263 | -1.897913 |
| O  | -1.101035 | -0.476274 | -2.597086 |
| O  | -1.195309 | -0.385773 | 2.007096  |
| O  | 0.271857  | -1.181460 | 8.616842  |
| O  | 0.365926  | -1.271186 | 4.013518  |
| O  | 2.106089  | 2.151354  | 7.918575  |
| O  | 2.177720  | 2.286403  | 4.507578  |
| O  | 3.220988  | 4.589636  | 6.372894  |
| Ti | 3.118422  | 3.949658  | 4.623480  |
| Ti | 2.880824  | 3.843171  | 8.057174  |
| Ti | 1.469191  | 0.262149  | 8.033687  |
| O  | 1.436858  | -0.007261 | 6.218307  |
| Ti | 1.704504  | 0.297434  | 4.340362  |
| O  | -3.096007 | -7.762704 | 8.674821  |
| O  | -0.322141 | -8.009278 | 3.843319  |
| O  | -0.184809 | -7.247802 | 8.790184  |
| O  | -1.436865 | -4.641676 | 8.492249  |
| Ti | -1.779132 | -6.529101 | 7.952695  |
| O  | -1.619802 | -6.653244 | 6.109247  |
| O  | -1.467405 | -4.819107 | 3.937708  |
| Ti | -1.904578 | -6.975847 | 4.189080  |
| O  | -3.322484 | -8.306990 | 4.099145  |
| O  | 1.431012  | -3.655284 | 8.823117  |
| Ti | -0.212648 | -3.087158 | 8.126380  |
| O  | -0.213848 | -3.164350 | 6.249680  |
| O  | 1.367728  | -4.175425 | 3.949666  |
| Ti | -0.170120 | -3.216253 | 4.346484  |
| O  | 3.382042  | -0.406479 | 4.071407  |
| Ti | 5.075623  | -1.140903 | 4.625005  |
| O  | 4.470287  | -1.023506 | 6.478090  |
| O  | 3.046243  | -0.181566 | 9.007509  |
| Ti | 4.608975  | -0.887024 | 8.302211  |
| O  | 6.559831  | -1.772938 | 8.686634  |
| O  | 6.930784  | -2.173634 | 3.955559  |
| O  | 4.604618  | 3.490903  | 8.732355  |
| O  | 4.856242  | 3.710294  | 4.039449  |
| O  | 5.975980  | 0.657183  | 4.028105  |
| Ti | 6.381779  | 2.595669  | 4.302687  |
| O  | 6.322004  | 2.628807  | 6.223913  |
| O  | 5.899260  | 0.715221  | 8.486224  |
| Ti | 6.107177  | 2.568743  | 8.093035  |
| O  | 7.604964  | 3.520089  | 8.830442  |
| O  | 8.611218  | 1.171922  | 7.752928  |
| O  | 8.507650  | 1.535275  | 4.117248  |
| O  | 7.871758  | 4.000366  | 3.868083  |
| O  | 9.324660  | 3.964923  | 6.323077  |
| Ti | 9.514818  | 3.193308  | 4.612794  |
| O  | 11.254134 | 3.325306  | 3.814667  |
| Ti | 9.124115  | 2.971341  | 7.898537  |

|    |            |           |          |
|----|------------|-----------|----------|
| O  | 10.954297  | 2.721194  | 8.442647 |
| Ti | 11.665283  | 1.435445  | 7.306235 |
| Ti | 12.257827  | 1.774997  | 4.516481 |
| O  | 11.811958  | -0.226255 | 8.096431 |
| Ti | 11.057206  | -1.950841 | 7.667084 |
| O  | 12.070141  | -2.229608 | 6.122954 |
| O  | 12.496586  | -0.095806 | 4.118021 |
| Ti | 11.492961  | -1.820339 | 4.390841 |
| O  | 10.577798  | 1.506044  | 5.667491 |
| O  | 10.902586  | -3.676108 | 8.448417 |
| O  | 9.266136   | -1.502274 | 7.610104 |
| Ti | 7.617914   | -0.495981 | 7.635790 |
| O  | 13.126125  | 1.991809  | 6.167357 |
| O  | 6.981909   | -0.595229 | 5.901585 |
| O  | 9.725034   | -1.228486 | 4.558177 |
| Ti | 8.048031   | -0.428333 | 4.184979 |
| Ti | 3.157568   | -4.634351 | 4.349239 |
| O  | 3.122976   | -3.993319 | 6.130476 |
| Ti | 3.035291   | -4.134374 | 7.981603 |
| Ti | 1.356659   | -8.153496 | 4.587251 |
| O  | 2.336242   | -5.992657 | 7.751751 |
| O  | 3.145571   | -8.299893 | 8.675641 |
| O  | 1.126428   | -8.451854 | 6.410747 |
| Ti | 1.461927   | -7.644621 | 8.062679 |
| O  | 2.362622   | -6.552344 | 3.997770 |
| Ti | 7.640933   | -7.152217 | 6.976404 |
| O  | 8.138683   | -8.452233 | 5.708233 |
| Ti | 7.528246   | -7.545246 | 4.163892 |
| O  | 7.099746   | -5.983232 | 5.412604 |
| O  | 5.984268   | -8.610766 | 3.874989 |
| O  | 6.206489   | -7.548004 | 8.022752 |
| O  | 4.860187   | -5.241733 | 8.358426 |
| Ti | 4.323319   | -7.080860 | 7.759699 |
| O  | 4.194120   | -7.346125 | 5.938268 |
| O  | 4.988904   | -5.723353 | 3.947925 |
| Ti | 4.249187   | -7.917438 | 4.054143 |
| O  | 2.810421   | -9.210905 | 4.040177 |
| O  | 4.477925   | -3.080996 | 4.057016 |
| O  | 4.260559   | -2.807185 | 8.778924 |
| Ti | 9.459269   | -4.710466 | 7.799540 |
| O  | 9.621763   | -4.636506 | 5.895106 |
| O  | 11.240531  | -3.696203 | 3.805674 |
| Ti | 9.730803   | -4.917846 | 4.039154 |
| O  | 9.243836   | -6.789669 | 3.512630 |
| O  | 9.174156   | -6.578854 | 7.889373 |
| O  | 7.840381   | -4.228742 | 8.590899 |
| Ti | 6.100410   | -3.662818 | 8.081278 |
| O  | 6.226863   | -3.666676 | 6.238044 |
| O  | 8.105454   | -4.224668 | 3.280100 |
| Ti | 6.345506   | -4.201238 | 4.371225 |
| Ti | -11.728451 | 1.594922  | 4.369845 |
| O  | -12.149210 | 1.694464  | 6.185756 |



|    |            |           |          |
|----|------------|-----------|----------|
| O  | -12.633052 | 0.169499  | 8.483265 |
| Ti | -11.404214 | 1.508020  | 7.901809 |
| O  | -10.976468 | 3.343161  | 8.240697 |
| O  | -11.322713 | 3.539054  | 4.069932 |
| O  | -10.132391 | 0.704806  | 4.286281 |
| Ti | -8.172967  | 0.803390  | 4.225042 |
| O  | -7.776528  | 0.499972  | 6.105934 |
| O  | -9.685536  | 0.889710  | 8.257060 |
| Ti | -7.844449  | 0.429455  | 7.929472 |
| O  | -5.982311  | -0.525629 | 8.526998 |
| O  | -6.201326  | -0.376255 | 3.915369 |
| Ti | -9.636887  | 4.388559  | 4.595739 |
| O  | -9.981800  | 5.413650  | 6.123659 |
| Ti | -9.474541  | 4.031447  | 7.368079 |
| O  | -8.995474  | 2.983627  | 5.793951 |
| O  | -7.990501  | 4.352931  | 8.411596 |
| O  | -7.909817  | 5.157367  | 3.859911 |
| O  | -6.751904  | 2.328670  | 3.949776 |
| Ti | -6.216576  | 4.258126  | 4.293716 |
| O  | -6.164421  | 4.157988  | 6.148733 |
| O  | -6.625365  | 1.953054  | 8.471346 |
| Ti | -6.169811  | 3.832766  | 8.014933 |
| O  | -4.899665  | 5.086747  | 8.730893 |
| O  | -4.196165  | 2.781402  | 7.716839 |
| O  | -4.227158  | 3.089058  | 4.115195 |
| O  | -4.854804  | 5.744961  | 3.977758 |
| O  | -3.074079  | 5.163340  | 6.180740 |
| Ti | -3.160987  | 4.696380  | 4.349829 |
| Ti | -3.305543  | 4.449167  | 7.889702 |
| Ti | -4.773448  | 0.884255  | 7.922012 |
| O  | -4.807716  | 0.697402  | 6.079249 |
| Ti | -4.897207  | 1.102622  | 4.229396 |
| Ti | -13.314172 | -5.019635 | 4.554827 |
| Ti | -13.402094 | -4.687962 | 7.354070 |
| O  | -13.895499 | -3.486445 | 3.505031 |
| Ti | -12.897719 | -1.740641 | 4.102829 |
| O  | -13.079271 | -1.508522 | 5.951805 |
| O  | -13.874816 | -3.095036 | 8.179144 |
| Ti | -12.725832 | -1.589915 | 7.823508 |
| O  | -12.154472 | -4.302708 | 5.910019 |
| O  | -12.988473 | 0.177702  | 3.697593 |
| O  | -11.214342 | -2.381767 | 3.731623 |
| Ti | -9.539572  | -3.183311 | 4.311331 |
| O  | -14.565194 | -5.307290 | 5.961310 |
| O  | -9.356178  | -2.538786 | 6.065461 |
| O  | -11.122036 | -2.249005 | 8.468596 |
| Ti | -9.431976  | -2.868215 | 7.872033 |
| Ti | -10.852610 | -6.843492 | 4.721963 |
| O  | -12.626996 | -6.698558 | 4.067565 |
| O  | -10.025606 | -4.773114 | 7.851319 |
| O  | -9.230627  | -7.118138 | 8.714200 |
| O  | -11.075082 | -7.455828 | 6.476574 |

|    |            |           |          |
|----|------------|-----------|----------|
| Ti | -10.819659 | -6.461036 | 8.022328 |
| O  | -12.623229 | -5.956707 | 8.473350 |
| O  | -10.088615 | -5.075357 | 4.507297 |
| O  | -6.430953  | -7.183231 | 3.774227 |
| O  | -6.351286  | -6.583656 | 8.740103 |
| O  | -7.642052  | -3.977130 | 8.404299 |
| Ti | -7.922121  | -5.876992 | 7.923526 |
| O  | -7.856832  | -5.997006 | 6.073146 |
| O  | -7.628333  | -4.085759 | 3.941104 |
| Ti | -8.027490  | -6.234117 | 4.110976 |
| O  | -9.387294  | -7.672406 | 4.015731 |
| O  | -8.510441  | -1.381537 | 3.867852 |
| O  | -8.281896  | -1.444203 | 8.576684 |
| O  | -4.860755  | -3.083640 | 8.886872 |
| Ti | -6.417304  | -2.421936 | 8.069626 |
| O  | -6.376058  | -2.450097 | 6.195355 |
| O  | -4.904031  | -3.227776 | 3.773988 |
| Ti | -6.492856  | -2.328173 | 4.289762 |
| O  | -3.138721  | 0.576207  | 3.835753 |
| Ti | -1.544018  | -0.250974 | 4.343926 |
| O  | -1.603038  | -0.227979 | 6.251596 |
| O  | -3.185797  | 0.438500  | 8.812626 |
| Ti | -1.572159  | -0.223429 | 8.123362 |
| O  | -1.644796  | 4.066784  | 8.628629 |
| O  | -1.329652  | 4.461091  | 4.057772 |
| O  | -0.338349  | 1.392661  | 4.018279 |
| Ti | 0.152560   | 3.320272  | 4.287669 |
| O  | 0.070125   | 3.341845  | 6.201117 |
| O  | -0.368874  | 1.366927  | 8.517381 |
| Ti | -0.004882  | 3.246575  | 8.062330 |
| O  | 1.294786   | 4.517519  | 8.779421 |
| O  | 1.604225   | 4.819461  | 3.823278 |
| Ti | -3.297472  | -3.807395 | 4.500011 |
| O  | -3.267538  | -3.085686 | 6.230533 |
| Ti | -3.257599  | -3.535595 | 8.038941 |
| Ti | -4.810607  | -7.368346 | 4.684492 |
| O  | -3.812395  | -5.421060 | 7.712082 |
| O  | -5.128654  | -7.948676 | 6.432570 |
| Ti | -4.705947  | -7.060379 | 8.011747 |
| O  | -3.895479  | -5.691759 | 4.632617 |
| O  | -2.103164  | -2.225044 | 3.886222 |
| O  | -2.042671  | -2.111808 | 8.664954 |

48c-like 3-D (1,2,1)-mer

|    |          |          |           |
|----|----------|----------|-----------|
| O  | 1.209129 | 0.468350 | 1.902783  |
| O  | 1.207124 | 0.442098 | -2.623340 |
| O  | 3.213855 | 3.990112 | 1.514116  |
| O  | 2.816700 | 3.742212 | -1.401051 |
| O  | 4.047417 | 6.429656 | -0.472715 |
| Ti | 3.697952 | 5.348766 | -1.927870 |
| Ti | 3.742150 | 5.850485 | 1.286946  |
| Ti | 2.445732 | 2.078204 | 1.484507  |

|    |           |           |           |
|----|-----------|-----------|-----------|
| O  | 2.608279  | 1.241026  | -0.182728 |
| Ti | 2.413158  | 1.861309  | -1.943920 |
| O  | -2.238502 | -6.732820 | 1.948393  |
| O  | 0.914479  | -5.706348 | -2.716559 |
| O  | 0.674486  | -6.088825 | 1.771848  |
| O  | -0.592361 | -3.125825 | 1.856912  |
| Ti | -0.897002 | -5.118930 | 1.578053  |
| O  | -0.884288 | -5.068749 | -0.346387 |
| O  | -0.481175 | -3.052361 | -2.709101 |
| Ti | -0.761783 | -4.922671 | -2.206478 |
| O  | -2.049042 | -6.131663 | -3.020298 |
| O  | 2.160346  | -2.472620 | 1.868903  |
| Ti | 0.629663  | -1.478980 | 1.490401  |
| O  | 0.677860  | -1.530405 | -0.410713 |
| O  | 2.386956  | -2.118089 | -2.882316 |
| Ti | 0.738604  | -1.481695 | -2.270779 |
| O  | 3.991506  | 1.536919  | -2.880250 |
| Ti | 5.549124  | 0.838612  | -2.068926 |
| O  | 5.523328  | 0.903106  | -0.178766 |
| O  | 4.262471  | 1.914341  | 2.359741  |
| Ti | 5.779967  | 0.912936  | 1.704470  |
| O  | 7.698267  | -0.104713 | 2.186882  |
| O  | 7.421629  | -0.103853 | -2.635470 |
| O  | 5.354603  | 5.870961  | 2.183046  |
| O  | 5.353177  | 4.825998  | -2.571493 |
| O  | 6.788948  | 2.369921  | -2.325604 |
| Ti | 6.944629  | 4.248685  | -1.673139 |
| O  | 6.829730  | 4.388588  | 0.171394  |
| O  | 7.115598  | 2.484284  | 2.028290  |
| Ti | 6.904225  | 4.671890  | 2.162321  |
| O  | 8.327255  | 6.019543  | 2.177086  |
| O  | 9.666489  | 3.438814  | 1.565403  |
| O  | 8.993161  | 3.207813  | -1.473320 |
| O  | 8.200285  | 5.497776  | -2.530683 |
| O  | 10.043477 | 5.975299  | -0.346545 |
| Ti | 9.800692  | 4.887296  | -1.822379 |
| O  | 11.507763 | 4.289885  | -2.382203 |
| Ti | 9.869035  | 5.385162  | 1.427824  |
| O  | 11.642602 | 5.236672  | 1.965737  |
| Ti | 11.985731 | 3.349873  | 1.576612  |
| Ti | 12.313268 | 2.997732  | -1.260185 |
| O  | 13.042616 | 1.793411  | 2.334620  |
| Ti | 12.143588 | 0.001624  | 1.847048  |
| O  | 12.319082 | -0.251182 | 0.003082  |
| O  | 12.991659 | 1.499367  | -2.191979 |
| Ti | 11.874409 | 0.000097  | -1.832343 |
| O  | 11.096513 | 2.295656  | 0.037654  |
| O  | 12.185199 | -1.915233 | 2.308511  |
| O  | 10.421326 | 0.532701  | 2.289782  |
| Ti | 8.946784  | 1.565636  | 1.565280  |
| O  | 13.259679 | 3.767599  | 0.141458  |
| O  | 8.568316  | 0.699337  | -0.075266 |

|    |            |           |           |
|----|------------|-----------|-----------|
| O  | 10.249305  | 0.665555  | -2.510753 |
| Ti | 8.603021   | 1.268809  | -1.830292 |
| Ti | 3.981759   | -2.497488 | -1.944979 |
| O  | 4.099848   | -2.259240 | -0.116017 |
| Ti | 4.025141   | -2.654213 | 1.747909  |
| Ti | 2.589487   | -6.071121 | -1.987746 |
| O  | 3.574897   | -4.710310 | 1.765799  |
| O  | 4.203299   | -7.365733 | 1.934628  |
| O  | 2.382373   | -6.876058 | -0.324652 |
| Ti | 2.531542   | -6.341594 | 1.490824  |
| O  | 3.437409   | -4.397867 | -1.712105 |
| Ti | 8.922911   | -6.240823 | 1.463703  |
| O  | 9.284621   | -7.186059 | -0.112514 |
| Ti | 8.752761   | -5.740327 | -1.298593 |
| O  | 8.271995   | -4.794792 | 0.321056  |
| O  | 7.274820   | -5.988448 | -2.376504 |
| O  | 7.168707   | -6.761725 | 2.235807  |
| O  | 6.100675   | -3.839455 | 2.048410  |
| Ti | 5.559490   | -5.790659 | 1.687122  |
| O  | 5.451154   | -5.728011 | -0.184886 |
| O  | 5.843506   | -3.539172 | -2.539419 |
| Ti | 5.456475   | -5.415912 | -2.045231 |
| O  | 4.201236   | -6.641085 | -2.838467 |
| O  | 5.140082   | -1.049747 | -2.576985 |
| O  | 5.334372   | -1.079397 | 1.995329  |
| Ti | 10.788740  | -3.242780 | 1.794585  |
| O  | 11.068950  | -3.204754 | -0.069936 |
| O  | 11.750801  | -1.778781 | -2.485145 |
| Ti | 10.537907  | -3.092057 | -1.860104 |
| O  | 10.218024  | -4.964245 | -2.151784 |
| O  | 10.524227  | -5.226084 | 2.037721  |
| O  | 9.133991   | -2.441993 | 1.989232  |
| Ti | 7.247653   | -2.180265 | 1.680804  |
| O  | 7.005055   | -2.042989 | -0.197640 |
| O  | 8.827317   | -2.544067 | -2.387670 |
| Ti | 7.041465   | -1.984133 | -2.049644 |
| Ti | -10.346168 | 3.007908  | -1.591382 |
| O  | -10.502839 | 2.938767  | 0.300765  |
| O  | -12.076462 | 2.042888  | 2.406357  |
| Ti | -10.538663 | 3.266756  | 2.168165  |
| O  | -9.991203  | 5.101835  | 2.682348  |
| O  | -10.100255 | 4.887005  | -1.674978 |
| O  | -8.744033  | 2.533983  | -2.433653 |
| Ti | -6.955819  | 1.976125  | -2.073757 |
| O  | -6.989552  | 1.968281  | -0.237497 |
| O  | -8.924714  | 2.445103  | 2.797827  |
| Ti | -7.155041  | 2.517033  | 1.645002  |
| O  | -5.254922  | 1.362245  | 1.806954  |
| O  | -5.109653  | 1.131030  | -2.810474 |
| Ti | -8.533361  | 5.467879  | -0.820645 |
| O  | -8.905442  | 6.750180  | 0.493048  |
| Ti | -8.288098  | 5.791831  | 2.032376  |

|    |            |           |           |
|----|------------|-----------|-----------|
| O  | -7.960789  | 4.251569  | 0.684987  |
| O  | -6.751148  | 6.856262  | 2.342237  |
| O  | -7.175355  | 5.814083  | -1.991526 |
| O  | -5.705428  | 3.529233  | -2.377513 |
| Ti | -5.276847  | 5.390787  | -1.799224 |
| O  | -5.130818  | 5.719117  | 0.004692  |
| O  | -5.756065  | 4.020132  | 1.920888  |
| Ti | -5.041174  | 6.200096  | 1.925637  |
| O  | -3.740011  | 7.616121  | 1.814712  |
| O  | -3.112609  | 4.909950  | 1.589480  |
| O  | -3.262871  | 4.325838  | -1.670972 |
| O  | -4.119341  | 6.527766  | -2.826533 |
| O  | -2.060958  | 7.037337  | -0.682438 |
| Ti | -2.419320  | 5.961356  | -2.155921 |
| Ti | -2.272917  | 6.675399  | 1.140068  |
| Ti | -3.989670  | 2.951935  | 1.476934  |
| O  | -3.737590  | 2.141949  | -0.196889 |
| Ti | -3.838920  | 2.444693  | -2.043421 |
| Ti | -12.558667 | -3.166507 | -1.152545 |
| Ti | -13.097127 | -3.629311 | 1.652920  |
| O  | -12.726723 | -1.477370 | -1.887240 |
| Ti | -11.941331 | 0.238427  | -1.455392 |
| O  | -12.951315 | 0.504642  | 0.101408  |
| O  | -13.178707 | -1.705851 | 2.072556  |
| Ti | -12.302021 | 0.135701  | 1.817209  |
| O  | -11.457983 | -3.257170 | 0.461711  |
| O  | -11.803345 | 1.968753  | -2.224588 |
| O  | -10.142200 | -0.205483 | -1.505913 |
| Ti | -8.463072  | -1.154541 | -1.690586 |
| O  | -13.998977 | -3.765297 | 0.010525  |
| O  | -7.771189  | -1.036841 | 0.022964  |
| O  | -10.536896 | -0.382309 | 1.569263  |
| Ti | -8.846768  | -1.259514 | 1.718156  |
| Ti | -9.931694  | -4.613493 | -1.805589 |
| O  | -11.796850 | -4.398869 | -2.315340 |
| O  | -9.643699  | -3.013286 | 2.066871  |
| O  | -8.389255  | -5.449809 | 1.857902  |
| O  | -10.079001 | -5.587712 | -0.234539 |
| Ti | -10.221432 | -4.785478 | 1.485077  |
| O  | -12.066676 | -5.251190 | 2.177946  |
| O  | -9.473846  | -2.806497 | -1.698097 |
| O  | -5.365269  | -5.151480 | -2.846305 |
| O  | -5.459622  | -5.903666 | 1.880234  |
| O  | -6.909899  | -2.353193 | 1.873112  |
| Ti | -6.667633  | -4.383847 | 1.826265  |
| O  | -6.656883  | -4.244003 | -0.143400 |
| O  | -6.756872  | -2.384099 | -2.495963 |
| Ti | -6.782424  | -4.235997 | -1.990961 |
| O  | -8.344792  | -5.157849 | -2.622627 |
| O  | -7.414433  | 0.109542  | -2.756449 |
| O  | -7.728987  | 0.476966  | 1.992538  |
| O  | -4.281084  | -1.505028 | 1.829410  |

|    |           |           |           |
|----|-----------|-----------|-----------|
| Ti | -5.879146 | -0.561965 | 1.282735  |
| O  | -5.236130 | -0.673062 | -0.559033 |
| O  | -3.907791 | -1.517139 | -3.127765 |
| Ti | -5.450997 | -0.794879 | -2.372312 |
| O  | -2.269547 | 1.992303  | -2.941621 |
| Ti | -0.674066 | 1.352411  | -2.157778 |
| O  | -0.764844 | 1.427070  | -0.285751 |
| O  | -2.162926 | 2.672968  | 2.263361  |
| Ti | -0.726325 | 1.561783  | 1.622268  |
| O  | -0.719903 | 6.643445  | 2.060642  |
| O  | -0.780062 | 5.437346  | -2.798415 |
| O  | 0.571984  | 2.906452  | -2.401510 |
| Ti | 0.782618  | 4.802380  | -1.827132 |
| O  | 0.542150  | 5.000274  | -0.008576 |
| O  | 0.649131  | 3.095610  | 1.792597  |
| Ti | 0.726975  | 5.298583  | 1.971866  |
| O  | 2.167887  | 6.615789  | 1.869662  |
| O  | 2.091170  | 5.959101  | -2.672141 |
| Ti | -2.323912 | -1.953473 | -2.167335 |
| O  | -2.282435 | -1.654414 | -0.346123 |
| Ti | -2.554915 | -2.070798 | 1.497815  |
| Ti | -3.641826 | -5.538096 | -2.221803 |
| O  | -3.013015 | -4.115498 | 1.403489  |
| O  | -3.896641 | -6.446006 | -0.606007 |
| Ti | -3.764202 | -5.876304 | 1.168425  |
| O  | -2.910637 | -3.843609 | -1.947893 |
| O  | -1.111949 | -0.520245 | -2.775953 |
| O  | -1.284867 | -0.409729 | 1.890644  |
| O  | 0.538943  | -1.022958 | 8.312334  |
| O  | 0.359291  | -1.377566 | 3.802072  |
| O  | 2.293557  | 2.441487  | 7.843366  |
| O  | 2.311372  | 2.060420  | 3.894246  |
| O  | 3.691186  | 3.932286  | 5.660336  |
| Ti | 3.619842  | 3.623438  | 3.767040  |
| Ti | 3.409628  | 3.985468  | 7.494017  |
| Ti | 1.752002  | 0.553495  | 7.887107  |
| O  | 1.716220  | 0.163980  | 6.052430  |
| Ti | 1.693976  | 0.123680  | 4.154783  |
| O  | -3.543361 | -7.946596 | 8.372656  |
| O  | -0.404032 | -7.998579 | 3.846875  |
| O  | -0.877387 | -7.860065 | 8.530243  |
| O  | -1.390069 | -4.665188 | 8.164242  |
| Ti | -2.167115 | -6.535759 | 7.762510  |
| O  | -1.927244 | -6.609151 | 5.959092  |
| O  | -1.499459 | -4.933784 | 3.709331  |
| Ti | -2.097426 | -7.089544 | 4.036470  |
| O  | -3.578782 | -8.358418 | 4.072340  |
| O  | 1.559665  | -3.633189 | 8.239551  |
| Ti | -0.152900 | -2.993076 | 7.876357  |
| O  | -0.384433 | -3.121915 | 6.011906  |
| O  | 1.418475  | -4.130034 | 3.910572  |
| Ti | -0.246487 | -3.352781 | 4.147054  |

|    |           |           |          |
|----|-----------|-----------|----------|
| O  | 3.294081  | -0.670758 | 3.582986 |
| Ti | 5.061882  | -1.040489 | 4.319618 |
| O  | 4.511695  | -0.931204 | 6.133007 |
| O  | 3.507437  | 0.284201  | 8.704653 |
| Ti | 4.920173  | -0.935119 | 7.940223 |
| O  | 6.893739  | -1.958003 | 8.212363 |
| O  | 6.922895  | -2.086576 | 3.889248 |
| O  | 5.161815  | 3.995931  | 8.222852 |
| O  | 5.568143  | 3.852958  | 3.688025 |
| O  | 6.034552  | 0.743709  | 4.041266 |
| Ti | 6.857891  | 2.532557  | 4.424827 |
| O  | 6.815753  | 2.691987  | 6.253177 |
| O  | 6.042151  | 0.821237  | 8.195556 |
| Ti | 6.700765  | 2.924754  | 8.203183 |
| O  | 8.223002  | 4.109684  | 8.798568 |
| O  | 8.696322  | 1.608169  | 8.066184 |
| O  | 8.785114  | 1.504067  | 4.238085 |
| O  | 8.255528  | 4.014811  | 3.864157 |
| O  | 9.825052  | 3.929659  | 6.376516 |
| Ti | 9.795439  | 3.177967  | 4.674610 |
| O  | 11.513096 | 3.263004  | 3.722065 |
| Ti | 9.743221  | 3.278964  | 8.178585 |
| O  | 11.763695 | 3.218895  | 8.110675 |
| Ti | 12.314655 | 1.766228  | 7.201229 |
| Ti | 12.616456 | 1.694985  | 4.384540 |
| O  | 12.360910 | 0.313591  | 8.458475 |
| Ti | 11.470575 | -1.531568 | 7.830169 |
| O  | 12.387249 | -1.748182 | 6.215644 |
| O  | 12.791105 | -0.162526 | 3.986850 |
| Ti | 11.678530 | -1.803872 | 4.449914 |
| O  | 11.087247 | 1.530394  | 5.711374 |
| O  | 11.297061 | -3.463295 | 8.185476 |
| O  | 9.781875  | -0.867577 | 7.686377 |
| Ti | 7.930754  | -0.222089 | 7.705119 |
| O  | 13.699024 | 2.020128  | 5.894313 |
| O  | 7.382395  | -0.467986 | 5.940939 |
| O  | 9.917527  | -1.229917 | 4.588220 |
| Ti | 8.222017  | -0.466319 | 4.201837 |
| Ti | 3.228460  | -4.650196 | 4.219987 |
| O  | 3.224871  | -4.638086 | 6.063616 |
| Ti | 3.257226  | -4.376539 | 7.945188 |
| Ti | 1.309587  | -7.972553 | 4.550671 |
| O  | 2.471624  | -6.272464 | 8.278154 |
| O  | 2.828909  | -8.833928 | 8.261003 |
| O  | 1.020417  | -7.874382 | 6.385579 |
| Ti | 1.042431  | -7.701840 | 8.287106 |
| O  | 2.416896  | -6.522646 | 3.715372 |
| Ti | 7.770443  | -7.608393 | 7.156069 |
| O  | 8.212717  | -8.749697 | 5.749867 |
| Ti | 7.583692  | -7.588116 | 4.320084 |
| O  | 7.177244  | -6.337457 | 5.791119 |
| O  | 6.029103  | -8.588285 | 3.878590 |

|    |            |           |          |
|----|------------|-----------|----------|
| O  | 6.097636   | -8.255299 | 8.070075 |
| O  | 5.075472   | -5.625336 | 8.180799 |
| Ti | 4.261627   | -7.482095 | 7.701850 |
| O  | 4.198720   | -7.495417 | 5.886581 |
| O  | 5.124649   | -5.698080 | 3.853352 |
| Ti | 4.271575   | -7.904355 | 3.942251 |
| O  | 2.741479   | -9.104788 | 4.031520 |
| O  | 4.459294   | -3.047991 | 3.886371 |
| O  | 4.452693   | -2.843639 | 8.310283 |
| Ti | 10.079302  | -4.935589 | 7.526743 |
| O  | 10.736261  | -5.412947 | 5.834751 |
| O  | 11.291436  | -3.646516 | 3.906955 |
| Ti | 10.014865  | -5.173628 | 4.129556 |
| O  | 9.304857   | -6.977652 | 3.496170 |
| O  | 9.460476   | -6.831816 | 7.773691 |
| O  | 8.473714   | -4.053753 | 7.528346 |
| Ti | 6.526289   | -4.071176 | 7.928883 |
| O  | 5.997081   | -3.776230 | 6.125358 |
| O  | 8.296759   | -4.443842 | 4.088057 |
| Ti | 6.391089   | -4.133048 | 4.349711 |
| Ti | -11.738740 | 1.623775  | 4.515279 |
| O  | -12.396607 | 2.100251  | 6.207375 |
| O  | -12.951660 | 0.335060  | 8.135686 |
| Ti | -11.674343 | 1.861695  | 7.912399 |
| O  | -10.963524 | 3.665895  | 8.545466 |
| O  | -11.118547 | 3.519644  | 4.267989 |
| O  | -10.133461 | 0.741195  | 4.514186 |
| Ti | -8.186455  | 0.756819  | 4.112029 |
| O  | -7.656149  | 0.463580  | 5.915437 |
| O  | -9.957501  | 1.130319  | 7.953197 |
| Ti | -8.051860  | 0.820183  | 7.690605 |
| O  | -6.120607  | -0.266470 | 8.154480 |
| O  | -6.112452  | -0.470313 | 3.730008 |
| Ti | -9.427831  | 4.295086  | 4.885047 |
| O  | -9.869629  | 5.437052  | 6.293885 |
| Ti | -9.241528  | 4.275351  | 7.721668 |
| O  | -8.835837  | 3.024211  | 6.250731 |
| O  | -7.686955  | 5.275561  | 8.163264 |
| O  | -7.755560  | 4.941920  | 3.970663 |
| O  | -6.735785  | 2.311602  | 3.859661 |
| Ti | -5.919834  | 4.168047  | 4.338218 |
| O  | -5.858102  | 4.180884  | 6.153694 |
| O  | -6.783757  | 2.384405  | 8.186645 |
| Ti | -5.929933  | 4.590356  | 8.097801 |
| O  | -4.400021  | 5.790900  | 8.006544 |
| O  | -4.077109  | 3.208339  | 8.324465 |
| O  | -4.131048  | 2.958434  | 3.762156 |
| O  | -4.487267  | 5.519604  | 3.778547 |
| O  | -2.679621  | 4.554666  | 5.654729 |
| Ti | -2.700825  | 4.387793  | 3.752304 |
| Ti | -2.968853  | 4.657478  | 7.488834 |
| Ti | -4.888873  | 1.335932  | 7.820329 |



|    |            |           |          |
|----|------------|-----------|----------|
| O  | -4.885630  | 1.322069  | 5.976690 |
| Ti | -4.917611  | 1.063077  | 4.095261 |
| Ti | -13.975503 | -5.078153 | 4.839758 |
| Ti | -14.275972 | -5.007479 | 7.656170 |
| O  | -14.020145 | -3.625079 | 3.583063 |
| Ti | -13.128850 | -1.780387 | 4.212674 |
| O  | -14.047685 | -1.563067 | 5.825994 |
| O  | -14.449966 | -3.149436 | 8.054690 |
| Ti | -13.337401 | -1.507551 | 7.591159 |
| O  | -12.748204 | -4.842196 | 6.329048 |
| O  | -12.956451 | 0.151062  | 3.856797 |
| O  | -11.440748 | -2.444973 | 4.358558 |
| Ti | -9.589851  | -3.090781 | 4.339463 |
| O  | -15.359604 | -5.331435 | 6.146890 |
| O  | -9.033706  | -2.841462 | 6.101908 |
| O  | -11.576782 | -2.081445 | 7.451290 |
| Ti | -9.883182  | -2.849187 | 7.839187 |
| Ti | -11.402942 | -6.590356 | 3.863746 |
| O  | -13.423410 | -6.530880 | 3.930986 |
| O  | -10.445004 | -4.816643 | 7.787515 |
| O  | -9.916164  | -7.326849 | 8.178012 |
| O  | -11.485745 | -7.246392 | 5.663753 |
| Ti | -11.455263 | -6.491320 | 7.364141 |
| O  | -13.173481 | -6.576073 | 8.317049 |
| O  | -10.357298 | -4.920878 | 3.978530 |
| O  | -6.820630  | -7.310133 | 3.817903 |
| O  | -7.228452  | -7.165215 | 8.356305 |
| O  | -7.694469  | -4.058562 | 8.001378 |
| Ti | -8.518542  | -5.846154 | 7.616058 |
| O  | -8.471864  | -6.007694 | 5.788092 |
| O  | -7.701938  | -4.135083 | 3.846030 |
| Ti | -8.359778  | -6.238672 | 3.837703 |
| O  | -9.882757  | -7.421301 | 3.242781 |
| O  | -8.553453  | -1.355549 | 3.829283 |
| O  | -8.584067  | -1.226741 | 8.152077 |
| O  | -4.957101  | -2.643744 | 8.458240 |
| Ti | -6.724757  | -2.273051 | 7.719298 |
| O  | -6.168091  | -2.381232 | 5.907538 |
| O  | -5.167562  | -3.599079 | 3.335906 |
| Ti | -6.579603  | -2.379154 | 4.101005 |
| O  | -3.218562  | 0.321929  | 3.800734 |
| Ti | -1.508083  | -0.321592 | 4.164991 |
| O  | -1.275892  | -0.192948 | 6.029531 |
| O  | -3.078185  | 0.818025  | 8.129831 |
| Ti | -1.414679  | 0.038130  | 7.893933 |
| O  | -1.254920  | 4.685476  | 8.193029 |
| O  | -0.781590  | 4.548419  | 3.512083 |
| O  | -0.270574  | 1.351443  | 3.878192 |
| Ti | 0.507642   | 3.221507  | 4.278965 |
| O  | 0.268692   | 3.294001  | 6.081866 |
| O  | -0.161084  | 1.619328  | 8.331952 |
| Ti | 0.437727   | 3.775145  | 8.004132 |

|    |           |           |           |
|----|-----------|-----------|-----------|
| O  | 1.919170  | 5.044171  | 7.968380  |
| O  | 1.884830  | 4.632834  | 3.668786  |
| Ti | -3.412917 | -3.868339 | 4.155490  |
| O  | -3.376983 | -3.478776 | 5.989834  |
| Ti | -3.356808 | -3.437653 | 7.887446  |
| Ti | -5.069371 | -7.300788 | 4.548650  |
| O  | -3.971840 | -5.374932 | 8.147170  |
| O  | -5.351401 | -7.249660 | 6.382295  |
| Ti | -5.279685 | -6.937562 | 8.274809  |
| O  | -3.953545 | -5.756195 | 4.200752  |
| O  | -2.200808 | -2.291985 | 3.728858  |
| O  | -2.021388 | -1.937004 | 8.238650  |
| O  | -0.549136 | -2.792992 | 14.817209 |
| O  | -0.376375 | -2.904049 | 10.151390 |
| O  | 1.250188  | 0.529689  | 13.989113 |
| O  | 1.354162  | 0.801060  | 10.636004 |
| O  | 2.237876  | 3.131433  | 12.646448 |
| Ti | 2.105028  | 2.560774  | 10.872427 |
| Ti | 1.981656  | 2.224309  | 14.262345 |
| Ti | 0.664070  | -1.360220 | 14.208466 |
| O  | 0.622437  | -1.659942 | 12.387506 |
| Ti | 0.894161  | -1.242895 | 10.543511 |
| O  | -3.751761 | -9.272693 | 14.714505 |
| O  | -0.940221 | -9.956042 | 9.979684  |
| O  | -0.880316 | -8.752157 | 14.839613 |
| O  | -2.233066 | -6.220751 | 14.444106 |
| Ti | -2.441926 | -8.116774 | 13.870072 |
| O  | -2.202945 | -8.314261 | 12.051169 |
| O  | -2.309727 | -6.408326 | 10.251294 |
| Ti | -2.387307 | -8.611493 | 10.070613 |
| O  | -3.827785 | -9.929166 | 10.172959 |
| O  | 0.609636  | -5.305482 | 14.982633 |
| Ti | -0.986112 | -4.666330 | 14.200182 |
| O  | -0.896028 | -4.741127 | 12.328274 |
| O  | 0.503220  | -5.985060 | 9.777844  |
| Ti | -0.934308 | -4.875305 | 10.419886 |
| O  | 2.620055  | -1.809567 | 10.212378 |
| Ti | 4.218313  | -2.752130 | 10.758070 |
| O  | 3.575698  | -2.642485 | 12.600055 |
| O  | 2.247384  | -1.797060 | 15.168367 |
| Ti | 3.790995  | -2.519584 | 14.413129 |
| O  | 5.754617  | -3.422595 | 14.797176 |
| O  | 6.068068  | -3.791001 | 10.048417 |
| O  | 3.705270  | 1.837806  | 14.887999 |
| O  | 3.800089  | 2.590889  | 10.159046 |
| O  | 5.249560  | -0.961280 | 10.167409 |
| Ti | 5.007421  | 1.069803  | 10.214194 |
| O  | 4.994893  | 0.929345  | 12.185532 |
| O  | 5.094859  | -0.929778 | 14.537435 |
| Ti | 5.121837  | 0.922271  | 14.030179 |
| O  | 6.683884  | 1.844776  | 14.663057 |
| O  | 7.811959  | -0.506025 | 13.738362 |

|    |           |            |           |
|----|-----------|------------|-----------|
| O  | 7.982873  | -0.300248  | 9.977114  |
| O  | 6.729436  | 2.136390   | 10.183278 |
| O  | 8.418479  | 2.274882   | 12.275587 |
| Ti | 8.561676  | 1.472992   | 10.556322 |
| O  | 10.407803 | 1.939490   | 9.864463  |
| Ti | 8.270237  | 1.300309   | 13.846206 |
| O  | 10.136195 | 1.085491   | 14.357198 |
| Ti | 10.899246 | -0.145396  | 13.193950 |
| Ti | 11.437847 | 0.318547   | 10.389180 |
| O  | 11.067600 | -1.834025  | 13.927841 |
| Ti | 10.281424 | -3.549873  | 13.498758 |
| O  | 11.294497 | -3.817603  | 11.939284 |
| O  | 11.521097 | -1.605588  | 9.969892  |
| Ti | 10.642579 | -3.447237  | 10.224354 |
| O  | 9.798621  | -0.054974  | 11.579429 |
| O  | 10.143682 | -5.281273  | 14.265451 |
| O  | 8.482898  | -3.106371  | 13.548327 |
| Ti | 6.802370  | -2.158856  | 13.731654 |
| O  | 12.339437 | 0.454940   | 12.031931 |
| O  | 6.110594  | -2.278242  | 12.018498 |
| O  | 8.877499  | -2.930112  | 10.471945 |
| Ti | 7.185951  | -2.054965  | 10.323324 |
| Ti | 2.329169  | -6.265369  | 10.563724 |
| O  | 2.075485  | -5.456325  | 12.238212 |
| Ti | 2.179891  | -5.758108  | 14.085248 |
| Ti | 0.612901  | -9.989048  | 10.899680 |
| O  | 1.601901  | -7.639251  | 13.712427 |
| O  | 2.458768  | -9.842703  | 14.865579 |
| O  | 0.399641  | -10.350105 | 12.721787 |
| Ti | 0.759426  | -9.275639  | 14.195951 |
| O  | 1.452533  | -8.223645  | 10.450232 |
| Ti | 6.874046  | -8.780504  | 12.861987 |
| O  | 7.247604  | -10.062963 | 11.547933 |
| Ti | 6.629607  | -9.104634  | 10.008692 |
| O  | 6.300424  | -7.565258  | 11.355675 |
| O  | 5.092176  | -10.169242 | 9.700174  |
| O  | 5.515717  | -9.127377  | 14.031028 |
| O  | 4.045427  | -6.843827  | 14.418371 |
| Ti | 3.618393  | -8.704627  | 13.839321 |
| O  | 3.474004  | -9.031338  | 12.035460 |
| O  | 4.095432  | -7.333343  | 10.119073 |
| Ti | 3.381493  | -9.513172  | 10.114543 |
| O  | 2.080612  | -10.929279 | 10.225340 |
| O  | 3.594708  | -4.676486  | 10.233559 |
| O  | 3.449879  | -4.446886  | 14.852531 |
| Ti | 8.687192  | -6.320477  | 13.631646 |
| O  | 8.842813  | -6.251566  | 11.740341 |
| O  | 10.416817 | -5.354586  | 9.635526  |
| Ti | 8.879777  | -6.578189  | 9.872017  |
| O  | 8.332508  | -8.414267  | 9.358807  |
| O  | 8.440337  | -8.199750  | 13.716835 |
| O  | 7.084756  | -5.846707  | 14.472925 |

|    |            |           |           |
|----|------------|-----------|-----------|
| Ti | 5.295836   | -5.290068 | 14.114362 |
| O  | 5.329017   | -5.283305 | 12.278171 |
| O  | 7.264629   | -5.759033 | 9.243397  |
| Ti | 5.494483   | -5.830688 | 10.395824 |
| Ti | -12.449037 | -0.068375 | 10.247248 |
| O  | -12.730379 | -0.103802 | 12.111848 |
| O  | -13.408425 | -1.533075 | 14.528076 |
| Ti | -12.197201 | -0.219112 | 13.901207 |
| O  | -11.876770 | 1.652751  | 14.194126 |
| O  | -12.183259 | 1.914711  | 10.003572 |
| O  | -10.795017 | -0.871242 | 10.053386 |
| Ti | -8.908674  | -1.134309 | 10.359833 |
| O  | -8.667683  | -1.270542 | 12.238015 |
| O  | -10.486793 | -0.767928 | 14.428694 |
| Ti | -8.701639  | -1.329292 | 14.089939 |
| O  | -6.799853  | -2.263778 | 14.614034 |
| O  | -6.997099  | -2.234968 | 10.045506 |
| Ti | -10.581939 | 2.929477  | 10.578197 |
| O  | -10.943378 | 3.874488  | 12.154909 |
| Ti | -10.411669 | 2.428136  | 13.340171 |
| O  | -9.932309  | 1.482604  | 11.720156 |
| O  | -8.932924  | 2.675782  | 14.418021 |
| O  | -8.827816  | 3.449859  | 9.805598  |
| O  | -7.761532  | 0.526379  | 9.991777  |
| Ti | -7.218846  | 2.476355  | 10.354045 |
| O  | -7.110435  | 2.415052  | 12.225129 |
| O  | -7.503620  | 0.225596  | 14.578818 |
| Ti | -7.115720  | 2.102811  | 14.085831 |
| O  | -5.860381  | 3.327112  | 14.879873 |
| O  | -5.096632  | 1.084806  | 13.750545 |
| O  | -5.234592  | 1.396090  | 10.274845 |
| O  | -5.862413  | 4.051142  | 10.104839 |
| O  | -4.040674  | 3.562762  | 12.364243 |
| Ti | -4.191063  | 3.027086  | 10.548670 |
| Ti | -4.248538  | 2.757951  | 14.028560 |
| Ti | -5.641790  | -0.814720 | 13.984100 |
| O  | -5.761014  | -1.055611 | 12.156179 |
| Ti | -5.685598  | -0.661000 | 10.291178 |
| Ti | -13.644152 | -6.663548 | 10.461703 |
| Ti | -13.970395 | -6.307532 | 13.299127 |
| O  | -14.701197 | -5.105634 | 9.706088  |
| Ti | -13.799093 | -3.315228 | 10.193715 |
| O  | -13.970565 | -3.061655 | 12.037867 |
| O  | -14.650599 | -4.810819 | 14.232593 |
| Ti | -13.531847 | -3.311816 | 13.874857 |
| O  | -12.753256 | -5.605256 | 12.000215 |
| O  | -13.843511 | -1.398313 | 9.733012  |
| O  | -12.077169 | -3.847971 | 9.746582  |
| Ti | -10.609014 | -4.879321 | 10.484424 |
| O  | -14.917565 | -7.077204 | 11.898131 |
| O  | -10.231536 | -4.007228 | 12.121432 |
| O  | -11.909778 | -3.981212 | 14.558048 |

|    |            |           |           |
|----|------------|-----------|-----------|
| Ti | -10.263608 | -4.581145 | 13.875487 |
| Ti | -11.529311 | -8.700214 | 10.611325 |
| O  | -13.303117 | -8.550300 | 10.073169 |
| O  | -10.652887 | -6.519083 | 13.513228 |
| O  | -9.860660  | -8.810179 | 14.570390 |
| O  | -11.703096 | -9.288554 | 12.386072 |
| Ti | -11.460320 | -8.199163 | 13.861456 |
| O  | -13.167030 | -7.599510 | 14.420604 |
| O  | -11.327216 | -6.753893 | 10.475625 |
| O  | -7.014407  | -9.184505 | 9.859418  |
| O  | -7.013929  | -8.139570 | 14.613272 |
| O  | -8.449383  | -5.682979 | 14.367951 |
| Ti | -8.604030  | -7.561778 | 13.714446 |
| O  | -8.488193  | -7.700797 | 11.869780 |
| O  | -8.780192  | -5.796550 | 10.014130 |
| Ti | -8.564301  | -7.985124 | 9.879270  |
| O  | -9.986976  | -9.333091 | 9.862820  |
| O  | -9.360852  | -3.211624 | 9.853632  |
| O  | -9.081463  | -3.209363 | 14.680257 |
| O  | -5.651995  | -4.850130 | 14.921802 |
| Ti | -7.209427  | -4.152333 | 14.110150 |
| O  | -7.186068  | -4.217542 | 12.220054 |
| O  | -5.923454  | -5.228789 | 9.682334  |
| Ti | -7.441238  | -4.226988 | 10.336363 |
| O  | -3.820558  | -0.840573 | 10.171441 |
| Ti | -2.290372  | -1.834997 | 10.550799 |
| O  | -2.339277  | -1.782545 | 12.452274 |
| O  | -4.048634  | -1.195586 | 14.923183 |
| Ti | -2.399872  | -1.831731 | 14.312303 |
| O  | -2.574055  | 2.391769  | 14.756107 |
| O  | -2.333738  | 2.775771  | 10.267298 |
| O  | -1.068054  | -0.188061 | 10.185778 |
| Ti | -0.763335  | 1.805685  | 10.463074 |
| O  | -0.775456  | 1.754335  | 12.386833 |
| O  | -1.179580  | -0.261668 | 14.751034 |
| Ti | -0.896752  | 1.608296  | 14.246914 |
| O  | 0.389182   | 2.817739  | 15.061512 |
| O  | 0.578470   | 3.418154  | 10.092577 |
| Ti | -4.106957  | -5.392175 | 10.556968 |
| O  | -4.272158  | -4.554021 | 12.225292 |
| Ti | -4.073433  | -5.174924 | 13.985935 |
| Ti | -5.402194  | -9.164301 | 10.755512 |
| O  | -4.477085  | -7.055503 | 13.442583 |
| O  | -5.707605  | -9.742917 | 12.514892 |
| Ti | -5.358230  | -8.661929 | 13.969521 |
| O  | -4.873606  | -7.303719 | 10.527093 |
| O  | -2.871951  | -3.781825 | 10.139394 |
| O  | -2.867295  | -3.755352 | 14.664585 |

48c-like 3-D (1,2,2)-mer

|   |          |          |           |
|---|----------|----------|-----------|
| O | 1.252433 | 0.541664 | 1.867232  |
| O | 1.282596 | 0.559729 | -2.652191 |

|    |           |           |           |
|----|-----------|-----------|-----------|
| O  | 3.243822  | 4.082910  | 1.557543  |
| O  | 2.857789  | 3.872810  | -1.401009 |
| O  | 4.061136  | 6.545008  | -0.381942 |
| Ti | 3.729458  | 5.505369  | -1.865023 |
| Ti | 3.780953  | 5.927988  | 1.376807  |
| Ti | 2.507654  | 2.178149  | 1.539633  |
| O  | 2.657099  | 1.390402  | -0.164711 |
| Ti | 2.462393  | 1.990232  | -1.927904 |
| O  | -1.666839 | -6.547264 | 1.676009  |
| O  | 1.048559  | -5.485084 | -3.040378 |
| O  | 1.239408  | -6.479681 | 1.549182  |
| O  | -0.554001 | -3.069371 | 1.701554  |
| Ti | -0.181915 | -5.138698 | 1.670501  |
| O  | -0.272801 | -4.897983 | -0.287561 |
| O  | -0.374280 | -2.939565 | -2.743635 |
| Ti | -0.517430 | -4.805972 | -2.120950 |
| O  | -1.770755 | -6.138372 | -2.827387 |
| O  | 2.215400  | -2.455408 | 1.874175  |
| Ti | 0.714248  | -1.401331 | 1.417615  |
| O  | 0.817691  | -1.436313 | -0.478413 |
| O  | 2.446538  | -2.015521 | -3.058801 |
| Ti | 0.836604  | -1.362748 | -2.344467 |
| O  | 4.028971  | 1.657780  | -2.885996 |
| Ti | 5.584147  | 0.940666  | -2.095367 |
| O  | 5.523030  | 0.959430  | -0.208300 |
| O  | 4.308544  | 2.000341  | 2.409624  |
| Ti | 5.764777  | 0.967520  | 1.679075  |
| O  | 7.682359  | -0.080490 | 2.124851  |
| O  | 7.466586  | 0.029947  | -2.687768 |
| O  | 5.424221  | 5.961281  | 2.221359  |
| O  | 5.380148  | 4.992487  | -2.529544 |
| O  | 6.805802  | 2.487941  | -2.309210 |
| Ti | 6.979005  | 4.363504  | -1.673061 |
| O  | 6.880968  | 4.489300  | 0.171197  |
| O  | 7.096724  | 2.554307  | 1.997671  |
| Ti | 6.950353  | 4.732247  | 2.170079  |
| O  | 8.443067  | 6.004947  | 2.160108  |
| O  | 9.753840  | 3.405824  | 1.405175  |
| O  | 9.046215  | 3.317914  | -1.516500 |
| O  | 8.232153  | 5.598297  | -2.564614 |
| O  | 10.108124 | 6.051224  | -0.409456 |
| Ti | 9.850249  | 4.985661  | -1.898868 |
| O  | 11.551791 | 4.409298  | -2.505653 |
| Ti | 9.943715  | 5.368893  | 1.334284  |
| O  | 11.719870 | 5.192116  | 1.842071  |
| Ti | 12.051990 | 3.308923  | 1.407240  |
| Ti | 12.417396 | 3.102994  | -1.439327 |
| O  | 13.119733 | 1.769942  | 2.177480  |
| Ti | 12.203455 | -0.048345 | 1.718279  |
| O  | 12.482029 | -0.231386 | -0.108831 |
| O  | 13.052055 | 1.590102  | -2.383217 |
| Ti | 11.924184 | 0.130685  | -1.899557 |

|    |            |           |           |
|----|------------|-----------|-----------|
| O  | 11.229185  | 2.307873  | -0.191760 |
| O  | 12.154819  | -1.972980 | 2.203591  |
| O  | 10.495558  | 0.533774  | 2.098436  |
| Ti | 8.941140   | 1.601440  | 1.607899  |
| O  | 13.345046  | 3.818583  | -0.002799 |
| O  | 8.538628   | 0.800009  | -0.076075 |
| O  | 10.255479  | 0.732735  | -2.524482 |
| Ti | 8.640353   | 1.385061  | -1.815738 |
| Ti | 4.028163   | -2.394964 | -2.118875 |
| O  | 4.037280   | -2.125940 | -0.287602 |
| Ti | 4.053842   | -2.680829 | 1.522469  |
| Ti | 2.739390   | -5.922470 | -2.458914 |
| O  | 3.627673   | -4.743445 | 1.477137  |
| O  | 4.360485   | -7.379965 | 1.727031  |
| O  | 2.608576   | -7.017467 | -0.951967 |
| Ti | 2.914606   | -6.485351 | 0.826285  |
| O  | 3.516660   | -4.312764 | -1.845940 |
| Ti | 9.038059   | -6.268509 | 1.330247  |
| O  | 9.476982   | -7.143108 | -0.281936 |
| Ti | 8.932074   | -5.673571 | -1.421479 |
| O  | 8.486109   | -4.740910 | 0.186800  |
| O  | 7.397293   | -5.894627 | -2.438571 |
| O  | 7.249260   | -6.714930 | 1.832791  |
| O  | 6.117008   | -3.768880 | 1.809571  |
| Ti | 5.699722   | -5.731003 | 1.474815  |
| O  | 5.372982   | -5.715360 | -0.405490 |
| O  | 5.910208   | -3.415424 | -2.698713 |
| Ti | 5.584223   | -5.290012 | -2.246938 |
| O  | 4.390029   | -6.351147 | -3.314991 |
| O  | 5.198937   | -0.937386 | -2.690267 |
| O  | 5.310792   | -1.056667 | 1.873390  |
| Ti | 10.760904  | -3.299080 | 1.696718  |
| O  | 11.104609  | -3.180113 | -0.154057 |
| O  | 11.790283  | -1.661847 | -2.550596 |
| Ti | 10.606628  | -3.000396 | -1.954584 |
| O  | 10.354956  | -4.871455 | -2.323347 |
| O  | 10.596287  | -5.282237 | 2.045079  |
| O  | 9.107649   | -2.491835 | 1.897014  |
| Ti | 7.268249   | -2.068906 | 1.542526  |
| O  | 7.017317   | -1.985557 | -0.331993 |
| O  | 8.882474   | -2.463742 | -2.486717 |
| Ti | 7.114708   | -1.859393 | -2.178451 |
| Ti | -10.291032 | 2.714970  | -1.565449 |
| O  | -10.417947 | 2.550588  | 0.311300  |
| O  | -12.069030 | 1.984994  | 2.524061  |
| Ti | -10.503444 | 3.150929  | 2.140790  |
| O  | -10.178974 | 5.011364  | 2.229052  |
| O  | -10.111144 | 4.597374  | -1.682158 |
| O  | -8.687051  | 2.325180  | -2.469542 |
| Ti | -6.905077  | 1.803163  | -2.074782 |
| O  | -6.941308  | 1.743042  | -0.243404 |
| O  | -8.894583  | 2.320080  | 2.820582  |

|    |            |           |           |
|----|------------|-----------|-----------|
| Ti | -7.167529  | 2.359398  | 1.624980  |
| O  | -5.262051  | 1.276602  | 1.789970  |
| O  | -5.022713  | 0.977711  | -2.770945 |
| Ti | -8.506682  | 5.240638  | -0.945249 |
| O  | -8.816427  | 6.587583  | 0.302777  |
| Ti | -8.376028  | 5.608422  | 1.904166  |
| O  | -7.937792  | 4.050938  | 0.586172  |
| O  | -6.846429  | 6.678671  | 2.320945  |
| O  | -7.192665  | 5.588475  | -2.175005 |
| O  | -5.676270  | 3.373288  | -2.384309 |
| Ti | -5.296185  | 5.274824  | -1.867200 |
| O  | -5.221345  | 5.657194  | -0.068914 |
| O  | -5.776968  | 3.913815  | 1.887729  |
| Ti | -5.117988  | 6.117351  | 1.853613  |
| O  | -3.825917  | 7.548077  | 1.757303  |
| O  | -3.159660  | 4.851252  | 1.530494  |
| O  | -3.280651  | 4.262863  | -1.634481 |
| O  | -4.133987  | 6.408341  | -2.897303 |
| O  | -2.129099  | 7.003020  | -0.710532 |
| Ti | -2.443138  | 5.891731  | -2.167172 |
| Ti | -2.329844  | 6.629699  | 1.110298  |
| Ti | -3.992684  | 2.864020  | 1.467046  |
| O  | -3.692310  | 2.020533  | -0.190137 |
| Ti | -3.804671  | 2.359567  | -2.025519 |
| Ti | -12.296069 | -3.400748 | -0.974977 |
| Ti | -12.854417 | -3.647756 | 1.844288  |
| O  | -12.530768 | -1.727323 | -1.735341 |
| Ti | -11.863413 | 0.043896  | -1.345815 |
| O  | -12.882438 | 0.354458  | 0.205949  |
| O  | -13.072376 | -1.764836 | 2.238524  |
| Ti | -12.227404 | 0.072068  | 1.937442  |
| O  | -11.179620 | -3.460187 | 0.614196  |
| O  | -11.790710 | 1.725652  | -2.211253 |
| O  | -10.037714 | -0.319886 | -1.427196 |
| Ti | -8.395698  | -1.312821 | -1.646125 |
| O  | -13.749064 | -3.897823 | 0.209585  |
| O  | -7.808406  | -1.317401 | 0.107598  |
| O  | -10.507175 | -0.581382 | 1.692613  |
| Ti | -8.843973  | -1.517077 | 1.854579  |
| Ti | -9.700133  | -4.813228 | -1.687662 |
| O  | -11.590859 | -4.712210 | -2.108427 |
| O  | -9.644797  | -3.279729 | 2.510768  |
| O  | -7.955723  | -5.254080 | 2.036211  |
| O  | -9.746794  | -5.736878 | -0.063692 |
| Ti | -9.916392  | -5.063311 | 1.695639  |
| O  | -11.847821 | -5.194835 | 2.522703  |
| O  | -9.387735  | -2.981391 | -1.712315 |
| O  | -5.040733  | -5.195020 | -2.963667 |
| O  | -5.251927  | -6.216110 | 1.845974  |
| O  | -6.900164  | -2.534370 | 1.946957  |
| Ti | -6.259518  | -4.461775 | 1.653997  |
| O  | -6.142132  | -4.332660 | -0.258492 |



|    |           |           |           |
|----|-----------|-----------|-----------|
| O  | -6.690261 | -2.533936 | -2.551006 |
| Ti | -6.488220 | -4.364967 | -2.097310 |
| O  | -8.090716 | -5.329826 | -2.502848 |
| O  | -7.340172 | -0.073717 | -2.744527 |
| O  | -7.766311 | 0.308175  | 1.982635  |
| O  | -4.241382 | -1.526610 | 1.837471  |
| Ti | -5.899483 | -0.678803 | 1.309008  |
| O  | -5.272792 | -0.895373 | -0.545322 |
| O  | -3.824504 | -1.658559 | -3.129826 |
| Ti | -5.380240 | -0.940162 | -2.365842 |
| O  | -2.228814 | 2.025976  | -2.967354 |
| Ti | -0.610083 | 1.445691  | -2.184766 |
| O  | -0.692599 | 1.523356  | -0.310204 |
| O  | -2.134686 | 2.681844  | 2.248480  |
| Ti | -0.657793 | 1.622611  | 1.596019  |
| O  | -0.767833 | 6.647371  | 2.019179  |
| O  | -0.773777 | 5.439346  | -2.776818 |
| O  | 0.617999  | 3.012674  | -2.402736 |
| Ti | 0.827949  | 4.907496  | -1.793159 |
| O  | 0.591453  | 5.079773  | 0.026053  |
| O  | 0.686686  | 3.173515  | 1.851071  |
| Ti | 0.759028  | 5.372473  | 2.011395  |
| O  | 2.194261  | 6.692280  | 1.965392  |
| O  | 2.109799  | 6.114140  | -2.602316 |
| Ti | -2.204845 | -1.910905 | -2.180450 |
| O  | -2.244193 | -1.449999 | -0.395768 |
| Ti | -2.485324 | -2.001406 | 1.416983  |
| Ti | -3.379788 | -5.529336 | -2.124374 |
| O  | -3.131667 | -3.975254 | 1.404984  |
| O  | -3.679776 | -6.432904 | -0.526518 |
| Ti | -3.390043 | -5.817926 | 1.228234  |
| O  | -2.629725 | -3.846007 | -1.783377 |
| O  | -1.036256 | -0.435805 | -2.802698 |
| O  | -1.203748 | -0.361285 | 1.856665  |
| O  | 0.509553  | -1.124592 | 8.199168  |
| O  | 0.444289  | -1.361735 | 3.737410  |
| O  | 2.270572  | 2.318196  | 7.642574  |
| O  | 2.326966  | 2.128742  | 3.932922  |
| O  | 3.775545  | 3.831849  | 5.796734  |
| Ti | 3.658289  | 3.687521  | 3.927218  |
| Ti | 3.548887  | 3.814063  | 7.696636  |
| Ti | 1.804759  | 0.449030  | 7.906882  |
| O  | 1.714791  | 0.021049  | 6.049621  |
| Ti | 1.690973  | 0.206881  | 4.189988  |
| O  | -3.178600 | -8.283560 | 7.958108  |
| O  | -0.213269 | -8.080807 | 3.569633  |
| O  | -0.273078 | -7.623819 | 7.912092  |
| O  | -1.386177 | -4.704514 | 7.957206  |
| Ti | -1.839652 | -6.661591 | 7.562406  |
| O  | -1.903976 | -6.780967 | 5.684058  |
| O  | -1.297556 | -4.939373 | 3.586264  |
| Ti | -1.857910 | -7.152594 | 3.788560  |

|    |           |           |          |
|----|-----------|-----------|----------|
| O  | -3.349867 | -8.412539 | 3.309099 |
| O  | 1.573032  | -3.801243 | 8.091890 |
| Ti | -0.118852 | -3.071503 | 7.755405 |
| O  | -0.115878 | -3.237521 | 5.842221 |
| O  | 1.273202  | -4.421123 | 3.239240 |
| Ti | -0.160639 | -3.285677 | 4.006360 |
| O  | 3.298804  | -0.486992 | 3.504307 |
| Ti | 5.003690  | -1.017602 | 4.168107 |
| O  | 4.556941  | -0.989866 | 6.003407 |
| O  | 3.631808  | 0.236355  | 8.611732 |
| Ti | 5.027106  | -0.971037 | 7.798356 |
| O  | 6.951341  | -2.010765 | 8.052109 |
| O  | 6.910596  | -2.053892 | 3.760073 |
| O  | 5.391508  | 3.950790  | 8.236358 |
| O  | 5.597303  | 3.933001  | 3.696117 |
| O  | 6.083675  | 0.745108  | 3.981103 |
| Ti | 6.888610  | 2.566628  | 4.357991 |
| O  | 6.887791  | 2.672269  | 6.169475 |
| O  | 6.178887  | 0.792769  | 8.133598 |
| Ti | 6.902071  | 2.871539  | 8.148312 |
| O  | 8.389760  | 4.064529  | 8.714716 |
| O  | 8.858118  | 1.574082  | 7.610688 |
| O  | 8.824643  | 1.523665  | 4.028145 |
| O  | 8.326544  | 4.020192  | 3.828246 |
| O  | 10.032654 | 3.918954  | 6.307478 |
| Ti | 9.883447  | 3.179612  | 4.627508 |
| O  | 11.551730 | 3.233033  | 3.571674 |
| Ti | 9.852342  | 3.147746  | 8.106014 |
| O  | 11.880678 | 3.026339  | 8.083136 |
| Ti | 12.375261 | 1.660792  | 7.024437 |
| Ti | 12.674283 | 1.681156  | 4.202902 |
| O  | 12.420606 | 0.164258  | 8.220084 |
| Ti | 11.524154 | -1.722468 | 7.690137 |
| O  | 12.427108 | -1.892610 | 6.060265 |
| O  | 12.836416 | -0.197715 | 3.838171 |
| Ti | 11.661682 | -1.791305 | 4.324575 |
| O  | 11.143187 | 1.474354  | 5.531392 |
| O  | 11.325140 | -3.620473 | 8.151123 |
| O  | 9.838800  | -1.072581 | 7.534745 |
| Ti | 8.068380  | -0.225025 | 7.633791 |
| O  | 13.753175 | 1.980669  | 5.722027 |
| O  | 7.383046  | -0.530301 | 5.893479 |
| O  | 9.917259  | -1.166568 | 4.460111 |
| Ti | 8.182304  | -0.428249 | 4.181036 |
| Ti | 3.128189  | -4.653918 | 3.905598 |
| O  | 3.133700  | -4.338568 | 5.751556 |
| Ti | 3.279200  | -4.458917 | 7.645495 |
| Ti | 1.571683  | -8.207467 | 4.123312 |
| O  | 2.643944  | -6.442534 | 7.790813 |
| O  | 3.237566  | -9.098620 | 8.014335 |
| O  | 1.350116  | -8.738023 | 5.904056 |
| Ti | 1.537775  | -8.054968 | 7.636672 |

|    |            |           |          |
|----|------------|-----------|----------|
| O  | 2.597921   | -6.565571 | 4.103854 |
| Ti | 8.098462   | -8.019270 | 7.346233 |
| O  | 8.547313   | -9.043976 | 5.843394 |
| Ti | 7.872551   | -7.751977 | 4.550455 |
| O  | 7.495497   | -6.650788 | 6.103043 |
| O  | 6.311892   | -8.436530 | 3.863858 |
| O  | 6.296438   | -8.506324 | 8.082703 |
| O  | 5.249788   | -5.698454 | 8.048732 |
| Ti | 4.592795   | -7.593927 | 7.581160 |
| O  | 4.504034   | -7.562833 | 5.757489 |
| O  | 5.144720   | -5.637403 | 3.586192 |
| Ti | 4.479132   | -7.790086 | 3.790178 |
| O  | 3.089930   | -9.124886 | 3.488737 |
| O  | 4.405745   | -3.021213 | 3.676712 |
| O  | 4.502282   | -2.911580 | 8.109960 |
| Ti | 10.080820  | -5.101698 | 7.631862 |
| O  | 10.580573  | -5.493403 | 5.841432 |
| O  | 11.183949  | -3.645127 | 3.874002 |
| Ti | 9.961639   | -5.173755 | 4.110720 |
| O  | 9.275882   | -7.019302 | 3.437897 |
| O  | 9.723826   | -7.060166 | 7.976460 |
| O  | 8.423374   | -4.292213 | 7.650406 |
| Ti | 6.496935   | -4.093424 | 7.728919 |
| O  | 5.999072   | -3.914837 | 5.913320 |
| O  | 8.195890   | -4.546463 | 3.960695 |
| Ti | 6.337805   | -4.036613 | 4.099889 |
| Ti | -11.656234 | 1.587009  | 4.607868 |
| O  | -12.293751 | 2.112485  | 6.290422 |
| O  | -12.940375 | 0.380557  | 8.299763 |
| Ti | -11.641366 | 1.913639  | 8.044145 |
| O  | -10.895979 | 3.733130  | 8.651161 |
| O  | -10.857237 | 3.440610  | 4.324666 |
| O  | -10.078717 | 0.666198  | 4.601812 |
| Ti | -8.137453  | 0.622222  | 4.120358 |
| O  | -7.595149  | 0.469435  | 5.931086 |
| O  | -9.956409  | 1.164555  | 8.150070 |
| Ti | -8.018521  | 0.968624  | 7.706419 |
| O  | -6.135543  | -0.203120 | 8.165979 |
| O  | -6.090268  | -0.529558 | 3.645394 |
| Ti | -9.195630  | 4.002118  | 5.092179 |
| O  | -9.675673  | 5.258770  | 6.373044 |
| Ti | -9.103470  | 4.278155  | 7.951425 |
| O  | -8.673654  | 2.823069  | 6.559726 |
| O  | -7.584741  | 5.359065  | 8.253788 |
| O  | -7.862689  | 4.763609  | 3.863782 |
| O  | -6.734111  | 2.237838  | 3.861870 |
| Ti | -5.911879  | 4.115432  | 4.259269 |
| O  | -5.954276  | 4.248578  | 6.072975 |
| O  | -6.688107  | 2.493998  | 8.214185 |
| Ti | -5.842630  | 4.619652  | 8.037123 |
| O  | -4.290559  | 5.790063  | 7.914275 |
| O  | -3.986265  | 3.209472  | 8.210988 |

|    |            |           |          |
|----|------------|-----------|----------|
| O  | -4.130888  | 2.917008  | 3.729727 |
| O  | -4.500752  | 5.473900  | 3.713752 |
| O  | -2.642404  | 4.545412  | 5.589507 |
| Ti | -2.694014  | 4.367167  | 3.688851 |
| Ti | -2.848911  | 4.658362  | 7.429619 |
| Ti | -4.865781  | 1.339437  | 7.810004 |
| O  | -4.845493  | 1.367947  | 5.954336 |
| Ti | -4.909025  | 1.004810  | 4.098580 |
| Ti | -14.004152 | -5.025641 | 5.063211 |
| Ti | -14.006687 | -5.238210 | 7.937333 |
| O  | -13.967868 | -3.608090 | 3.769139 |
| Ti | -13.070973 | -1.805082 | 4.418755 |
| O  | -13.985623 | -1.577137 | 6.040843 |
| O  | -14.104698 | -3.292850 | 8.248319 |
| Ti | -13.216274 | -1.509024 | 7.786443 |
| O  | -12.632312 | -4.800294 | 6.395633 |
| O  | -12.895326 | 0.105367  | 3.993076 |
| O  | -11.383105 | -2.484291 | 4.608623 |
| Ti | -9.552774  | -3.174063 | 4.663737 |
| O  | -15.211131 | -5.466327 | 6.478865 |
| O  | -8.661247  | -2.593397 | 6.263203 |
| O  | -11.437925 | -1.982409 | 7.598439 |
| Ti | -9.753449  | -2.817731 | 7.921572 |
| Ti | -11.372927 | -6.352387 | 4.235179 |
| O  | -13.376899 | -6.435548 | 4.124201 |
| O  | -10.664906 | -4.562009 | 8.257654 |
| O  | -9.484526  | -6.986171 | 7.939988 |
| O  | -11.304977 | -7.484762 | 5.699025 |
| Ti | -11.063916 | -6.189608 | 7.136612 |
| O  | -12.765092 | -6.698569 | 8.280319 |
| O  | -10.372832 | -4.959496 | 5.273582 |
| O  | -6.840093  | -7.455525 | 3.644338 |
| O  | -6.373488  | -7.556377 | 8.297531 |
| O  | -7.816355  | -3.963293 | 8.041096 |
| Ti | -7.643907  | -6.012569 | 7.985753 |
| O  | -7.751425  | -6.108411 | 6.080097 |
| O  | -7.687075  | -4.162700 | 4.289536 |
| Ti | -8.023415  | -6.134608 | 4.176399 |
| O  | -9.758349  | -6.639171 | 3.180107 |
| O  | -8.517497  | -1.457848 | 3.928026 |
| O  | -8.636999  | -1.057534 | 8.231217 |
| O  | -5.131795  | -3.070582 | 8.100022 |
| Ti | -6.772369  | -2.119996 | 7.562247 |
| O  | -5.886165  | -2.105552 | 5.833737 |
| O  | -5.139452  | -3.750049 | 3.345405 |
| Ti | -6.517067  | -2.467109 | 4.150073 |
| O  | -3.185432  | 0.326784  | 3.756089 |
| Ti | -1.465389  | -0.281938 | 4.110666 |
| O  | -1.271813  | -0.260277 | 5.967918 |
| O  | -3.107249  | 0.684965  | 8.136847 |
| Ti | -1.403927  | -0.003639 | 7.845256 |
| O  | -1.154993  | 4.669149  | 8.169921 |

|    |           |           |           |
|----|-----------|-----------|-----------|
| O  | -0.769931 | 4.601361  | 3.496197  |
| O  | -0.235164 | 1.389520  | 3.876998  |
| Ti | 0.535010  | 3.291715  | 4.281835  |
| O  | 0.266526  | 3.335985  | 6.071463  |
| O  | -0.149153 | 1.552226  | 8.277153  |
| Ti | 0.514443  | 3.672238  | 8.019796  |
| O  | 2.075477  | 4.882728  | 8.164567  |
| O  | 1.936891  | 4.703655  | 3.736948  |
| Ti | -3.249949 | -3.904902 | 3.952053  |
| O  | -3.217748 | -3.646547 | 5.777357  |
| Ti | -3.398177 | -3.570568 | 7.682548  |
| Ti | -4.902742 | -7.419117 | 3.609251  |
| O  | -3.923456 | -5.642634 | 7.769518  |
| O  | -4.984774 | -7.550340 | 5.555196  |
| Ti | -4.749396 | -7.374317 | 7.345196  |
| O  | -3.634476 | -5.838891 | 3.626042  |
| O  | -2.083427 | -2.273570 | 3.655037  |
| O  | -2.048276 | -2.032694 | 8.047903  |
| O  | -0.404517 | -2.697024 | 14.406948 |
| O  | -0.439136 | -2.938892 | 10.014990 |
| O  | 1.145566  | 0.868101  | 14.434991 |
| O  | 1.435936  | 0.671404  | 10.292779 |
| O  | 2.495748  | 2.580626  | 12.506234 |
| Ti | 2.261811  | 2.402668  | 10.716142 |
| Ti | 2.411924  | 2.449654  | 14.451981 |
| Ti | 0.762917  | -1.066579 | 14.110165 |
| O  | 0.731081  | -1.324801 | 12.284977 |
| Ti | 0.911036  | -1.400938 | 10.379507 |
| O  | -4.424223 | -9.673382 | 14.327243 |
| O  | -1.331091 | -9.639347 | 9.894000  |
| O  | -1.716254 | -9.568315 | 14.566497 |
| O  | -2.252492 | -6.360364 | 14.186199 |
| Ti | -3.023247 | -8.261686 | 13.780363 |
| O  | -2.754848 | -8.307101 | 11.990805 |
| O  | -2.338976 | -6.523419 | 9.784345  |
| Ti | -3.001896 | -8.643784 | 10.042249 |
| O  | -4.562591 | -9.854237 | 9.897569  |
| O  | 0.700310  | -5.292459 | 14.304550 |
| Ti | -1.022295 | -4.689062 | 13.952294 |
| O  | -1.217579 | -4.713402 | 12.095082 |
| O  | 0.619099  | -5.656473 | 9.925872  |
| Ti | -1.084304 | -4.967463 | 10.217663 |
| O  | 2.643616  | -1.903849 | 9.961625  |
| Ti | 4.285484  | -2.852686 | 10.498710 |
| O  | 3.400230  | -2.866114 | 12.227770 |
| O  | 2.653333  | -1.219337 | 14.714979 |
| Ti | 4.031374  | -2.501915 | 13.910733 |
| O  | 6.031413  | -3.511975 | 14.133074 |
| O  | 6.150030  | -3.915118 | 9.828958  |
| O  | 4.349719  | 2.486579  | 14.417574 |
| O  | 3.885808  | 2.584790  | 9.763325  |
| O  | 5.329305  | -1.009761 | 10.019407 |

|    |           |            |           |
|----|-----------|------------|-----------|
| Ti | 5.155034  | 1.039211   | 10.076095 |
| O  | 5.258999  | 1.136603   | 11.981632 |
| O  | 5.201382  | -0.807458  | 13.769098 |
| Ti | 5.532701  | 1.165418   | 13.885411 |
| O  | 7.270189  | 1.667285   | 14.877923 |
| O  | 7.887430  | -0.011562  | 12.785493 |
| O  | 8.178854  | -0.410319  | 9.801594  |
| O  | 6.995377  | 2.012087   | 10.122645 |
| O  | 8.818942  | 2.513547   | 12.361277 |
| Ti | 8.575172  | 1.215595   | 10.925319 |
| O  | 10.275909 | 1.726256   | 9.780638  |
| Ti | 8.887437  | 1.382042   | 13.825312 |
| O  | 10.891205 | 1.466373   | 13.938831 |
| Ti | 11.519604 | 0.056865   | 12.999750 |
| Ti | 11.518751 | 0.268167   | 10.125029 |
| O  | 11.482975 | -1.361922  | 14.292041 |
| Ti | 10.585834 | -3.164992  | 13.643641 |
| O  | 11.499935 | -3.394050  | 12.021299 |
| O  | 11.616193 | -1.676549  | 9.813771  |
| Ti | 10.730011 | -3.461002  | 10.276577 |
| O  | 10.146522 | -0.169620  | 11.668189 |
| O  | 10.408811 | -5.075515  | 14.069499 |
| O  | 8.897886  | -2.486029  | 13.454897 |
| Ti | 7.066537  | -1.796468  | 13.395216 |
| O  | 12.724520 | 0.498348   | 11.583964 |
| O  | 6.176823  | -2.378397  | 11.796524 |
| O  | 8.951541  | -2.987387  | 10.465577 |
| Ti | 7.266687  | -2.154780  | 10.137444 |
| Ti | 2.377273  | -6.311820  | 10.252125 |
| O  | 2.357872  | -6.338395  | 12.107881 |
| Ti | 2.423196  | -5.973159  | 13.963088 |
| Ti | 0.363027  | -9.630548  | 10.633620 |
| O  | 1.644283  | -7.885396  | 14.332267 |
| O  | 2.016704  | -10.442305 | 14.348644 |
| O  | 0.157274  | -9.518238  | 12.473756 |
| Ti | 0.208354  | -9.336216  | 14.373624 |
| O  | 1.498532  | -8.181664  | 9.849976  |
| Ti | 6.708475  | -8.970181  | 12.968360 |
| O  | 7.190733  | -10.226428 | 11.688005 |
| Ti | 6.617137  | -9.248483  | 10.108605 |
| O  | 6.185066  | -7.792761  | 11.499889 |
| O  | 5.098970  | -10.330161 | 9.807941  |
| O  | 5.376478  | -9.732898  | 14.197316 |
| O  | 4.247947  | -7.206595  | 14.199755 |
| Ti | 3.425706  | -9.083567  | 13.801917 |
| O  | 3.467908  | -9.217441  | 11.988119 |
| O  | 4.200297  | -7.466037  | 9.846615  |
| Ti | 3.356447  | -9.591031  | 10.024154 |
| O  | 1.805021  | -10.761843 | 10.148345 |
| O  | 3.647870  | -4.769587  | 9.895811  |
| O  | 3.604531  | -4.439008  | 14.418319 |
| Ti | 9.170471  | -6.556863  | 13.453389 |

|    |            |           |           |
|----|------------|-----------|-----------|
| O  | 9.808581   | -7.082502 | 11.771208 |
| O  | 10.452778  | -5.349784 | 9.762170  |
| Ti | 9.155028   | -6.883408 | 10.017874 |
| O  | 8.409976   | -8.702923 | 9.409830  |
| O  | 8.370216   | -8.409417 | 13.736160 |
| O  | 7.592954   | -5.635672 | 13.458573 |
| Ti | 5.652347   | -5.591337 | 13.941018 |
| O  | 5.107762   | -5.439959 | 12.131131 |
| O  | 7.469167   | -6.136584 | 9.913076  |
| Ti | 5.530478   | -5.940261 | 10.355875 |
| Ti | -12.566211 | 0.132219  | 10.429488 |
| O  | -13.067754 | 0.523878  | 12.219339 |
| O  | -13.674908 | -1.322791 | 14.188290 |
| Ti | -12.448904 | 0.202818  | 13.949800 |
| O  | -11.761602 | 2.048763  | 14.622245 |
| O  | -12.209856 | 2.090919  | 10.085511 |
| O  | -10.908896 | -0.677959 | 10.411631 |
| Ti | -8.983408  | -0.880828 | 10.331379 |
| O  | -8.486084  | -1.060475 | 12.147134 |
| O  | -10.684211 | -0.426110 | 14.099337 |
| Ti | -8.825614  | -0.934977 | 13.960187 |
| O  | -6.894093  | -1.949467 | 14.384803 |
| O  | -6.988504  | -2.061461 | 9.950645  |
| Ti | -10.583345 | 3.048048  | 10.715266 |
| O  | -11.031660 | 4.073915  | 12.218638 |
| Ti | -10.357234 | 2.782110  | 13.511345 |
| O  | -9.980660  | 1.680213  | 11.959510 |
| O  | -8.797838  | 3.470243  | 14.198449 |
| O  | -8.782371  | 3.533387  | 9.976793  |
| O  | -7.735935  | 0.724828  | 10.013821 |
| Ti | -7.079493  | 2.620961  | 10.480732 |
| O  | -6.990954  | 2.592228  | 12.304395 |
| O  | -7.634801  | 0.667443  | 14.473611 |
| Ti | -6.966711  | 2.820900  | 14.271862 |
| O  | -5.576948  | 4.155630  | 14.572319 |
| O  | -5.085899  | 1.595332  | 13.957554 |
| O  | -5.131024  | 1.470314  | 10.271558 |
| O  | -5.724714  | 4.125893  | 10.046609 |
| O  | -3.836665  | 3.766471  | 12.156874 |
| Ti | -4.024782  | 3.083182  | 10.424001 |
| Ti | -4.059931  | 3.237078  | 13.937532 |
| Ti | -5.616750  | -0.316331 | 14.157395 |
| O  | -5.621803  | -0.632965 | 12.311180 |
| Ti | -5.766234  | -0.513528 | 10.417424 |
| Ti | -14.863922 | -6.631076 | 11.037055 |
| Ti | -15.162508 | -6.650878 | 13.858215 |
| O  | -14.910359 | -5.135110 | 9.840618  |
| Ti | -14.012021 | -3.248727 | 10.371550 |
| O  | -14.914801 | -3.077991 | 12.001444 |
| O  | -15.324368 | -4.771835 | 14.224258 |
| Ti | -14.150898 | -3.177322 | 13.738113 |
| O  | -13.631227 | -6.444783 | 12.529606 |

|    |            |           |           |
|----|------------|-----------|-----------|
| O  | -13.809397 | -1.350600 | 9.912009  |
| O  | -12.328002 | -3.903147 | 10.523928 |
| Ti | -10.556308 | -4.748277 | 10.425663 |
| O  | -16.241720 | -6.949100 | 12.339615 |
| O  | -9.875120  | -4.441936 | 12.167127 |
| O  | -12.406192 | -3.801311 | 13.602579 |
| Ti | -10.672279 | -4.541506 | 13.880384 |
| Ti | -12.341824 | -8.120888 | 9.956303  |
| O  | -14.369782 | -7.998444 | 9.979697  |
| O  | -11.313721 | -6.495166 | 14.033100 |
| O  | -10.815573 | -8.990837 | 14.235463 |
| O  | -12.520926 | -8.891738 | 11.755252 |
| Ti | -12.372050 | -8.150126 | 13.435363 |
| O  | -14.041540 | -8.203799 | 14.489079 |
| O  | -11.346621 | -6.547667 | 10.449675 |
| O  | -7.878833  | -8.921617 | 9.827117  |
| O  | -8.085905  | -8.903229 | 14.365782 |
| O  | -8.572878  | -5.716037 | 14.079942 |
| Ti | -9.377985  | -7.537066 | 13.704233 |
| O  | -9.378442  | -7.645117 | 11.892720 |
| O  | -8.667204  | -5.765744 | 9.927821  |
| Ti | -9.391563  | -7.845106 | 9.913841  |
| O  | -10.878922 | -9.038609 | 9.348030  |
| O  | -9.439052  | -2.962439 | 10.007475 |
| O  | -9.398807  | -2.917697 | 14.301217 |
| O  | -5.786030  | -4.482327 | 14.556278 |
| Ti | -7.491788  | -3.953687 | 13.893513 |
| O  | -7.047982  | -3.982829 | 12.057539 |
| O  | -6.119819  | -5.209836 | 9.450025  |
| Ti | -7.514639  | -4.001467 | 10.261810 |
| O  | -4.060219  | -1.170417 | 9.969632  |
| Ti | -2.368276  | -1.900008 | 10.306539 |
| O  | -2.371132  | -1.733233 | 12.219432 |
| O  | -3.761270  | -0.550068 | 14.822838 |
| Ti | -2.327315  | -1.685114 | 14.055306 |
| O  | -2.276599  | 3.108888  | 14.494207 |
| O  | -2.213759  | 2.654028  | 10.147763 |
| O  | -1.101250  | -0.266388 | 10.104965 |
| Ti | -0.647947  | 1.690633  | 10.499362 |
| O  | -0.586393  | 1.809365  | 12.377773 |
| O  | -1.190932  | -0.031740 | 14.475613 |
| Ti | -0.632383  | 2.179919  | 14.273157 |
| O  | 0.858566   | 3.441790  | 14.752411 |
| O  | 0.690979   | 3.312221  | 10.104570 |
| Ti | -4.292451  | -5.421083 | 10.154264 |
| O  | -4.203224  | -4.992010 | 12.011720 |
| Ti | -4.178482  | -5.177582 | 13.871094 |
| Ti | -6.036204  | -8.785962 | 10.366985 |
| O  | -4.815270  | -7.098943 | 14.129092 |
| O  | -6.263005  | -8.805633 | 12.266725 |
| Ti | -6.146473  | -8.657767 | 14.136255 |
| O  | -4.758392  | -7.290033 | 10.420785 |



|    |           |            |           |
|----|-----------|------------|-----------|
| O  | -2.997328 | -3.846710  | 9.863440  |
| O  | -2.932197 | -3.608908  | 14.324160 |
| O  | -1.449772 | -4.533913  | 20.865308 |
| O  | -1.283043 | -4.609968  | 16.205752 |
| O  | 0.142132  | -1.123927  | 19.845893 |
| O  | 0.645659  | -0.995599  | 16.655541 |
| O  | 1.193203  | 1.462303   | 18.587395 |
| Ti | 0.901516  | 0.847784   | 16.833394 |
| Ti | 0.893477  | 0.559602   | 20.186300 |
| Ti | -0.281520 | -3.059443  | 20.242277 |
| O  | -0.241780 | -3.520548  | 18.457816 |
| Ti | -0.001462 | -2.969940  | 16.644821 |
| O  | -4.597508 | -11.082199 | 20.665183 |
| O  | -1.718031 | -11.616226 | 16.040831 |
| O  | -1.712731 | -10.408811 | 20.838769 |
| O  | -3.105244 | -7.982349  | 20.465821 |
| Ti | -3.314953 | -9.876795  | 19.855948 |
| O  | -3.077357 | -10.049129 | 18.036662 |
| O  | -3.174634 | -8.143078  | 16.212764 |
| Ti | -3.244759 | -10.341342 | 16.051590 |
| O  | -4.680097 | -11.660801 | 16.099646 |
| O  | -0.253867 | -6.995387  | 21.030034 |
| Ti | -1.876447 | -6.415748  | 20.248531 |
| O  | -1.794391 | -6.494079  | 18.373509 |
| O  | -0.350472 | -7.650717  | 15.815464 |
| Ti | -1.828963 | -6.593637  | 16.467860 |
| O  | 1.755163  | -3.443073  | 16.224503 |
| Ti | 3.413927  | -4.290374  | 16.751466 |
| O  | 2.786596  | -4.073750  | 18.605897 |
| O  | 1.339848  | -3.311398  | 21.191376 |
| Ti | 2.894279  | -4.028635  | 20.426151 |
| O  | 4.853985  | -4.894403  | 20.805371 |
| O  | 5.281271  | -5.277743  | 16.079179 |
| O  | 2.555043  | 0.227064   | 21.026427 |
| O  | 2.762866  | 1.246369   | 16.215230 |
| O  | 4.414375  | -2.433434  | 16.114487 |
| Ti | 3.770419  | -0.507407  | 16.407510 |
| O  | 3.653371  | -0.636475  | 18.321838 |
| O  | 4.202904  | -2.434020  | 20.611902 |
| Ti | 4.001431  | -0.602994  | 20.159175 |
| O  | 5.603192  | 0.363693   | 20.562621 |
| O  | 6.899284  | -1.985950  | 19.771629 |
| O  | 7.157355  | -1.689306  | 15.549373 |
| O  | 5.466024  | 0.285520   | 16.023829 |
| O  | 7.258426  | 0.768400   | 18.121921 |
| Ti | 7.427998  | 0.093468   | 16.363815 |
| O  | 9.360243  | 0.225009   | 15.537984 |
| Ti | 7.212339  | -0.153873  | 19.746736 |
| O  | 9.102511  | -0.255356  | 20.168189 |
| Ti | 9.806934  | -1.567773  | 19.034621 |
| Ti | 10.366851 | -1.321937  | 16.215932 |
| O  | 10.043491 | -3.240561  | 19.796452 |

|    |            |            |           |
|----|------------|------------|-----------|
| Ti | 9.376388   | -5.012259  | 19.407856 |
| O  | 10.394771  | -5.324011  | 17.855919 |
| O  | 10.586651  | -3.205585  | 15.823681 |
| Ti | 9.739758   | -5.041320  | 16.124512 |
| O  | 8.691224   | -1.509995  | 17.445395 |
| O  | 9.304573   | -6.694233  | 20.273141 |
| O  | 7.550859   | -4.647469  | 19.489659 |
| Ti | 5.908569   | -3.655378  | 19.707187 |
| O  | 11.260345  | -1.070627  | 17.851700 |
| O  | 5.320734   | -3.651613  | 17.953675 |
| O  | 8.019699   | -4.387732  | 16.370195 |
| Ti | 6.357281   | -3.451797  | 16.206638 |
| Ti | 1.508092   | -7.833600  | 16.595990 |
| O  | 1.209821   | -6.991733  | 18.252611 |
| Ti | 1.318283   | -7.328896  | 20.089178 |
| Ti | -0.156502  | -11.600444 | 16.950665 |
| O  | 0.794621   | -9.231502  | 19.697343 |
| O  | 1.648239   | -11.376764 | 20.959861 |
| O  | -0.356679  | -11.971591 | 18.771986 |
| Ti | -0.043129  | -10.860996 | 20.229328 |
| O  | 0.673929   | -9.821925  | 16.530534 |
| Ti | 6.024787   | -10.209638 | 19.006935 |
| O  | 6.336765   | -11.555148 | 17.757975 |
| Ti | 5.891633   | -10.577420 | 16.156819 |
| O  | 5.453979   | -9.019990  | 17.475379 |
| O  | 4.361585   | -11.648407 | 15.744500 |
| O  | 4.707998   | -10.557859 | 20.232913 |
| O  | 3.190841   | -8.342878  | 20.447937 |
| Ti | 2.810635   | -10.244091 | 19.929524 |
| O  | 2.732880   | -10.626957 | 18.131413 |
| O  | 3.291979   | -8.883511  | 16.174582 |
| Ti | 2.631978   | -11.087222 | 16.208829 |
| O  | 1.339711   | -12.518183 | 16.303224 |
| O  | 2.776783   | -6.246404  | 16.271859 |
| O  | 2.537333   | -5.945616  | 20.832449 |
| Ti | 7.805751   | -7.684707  | 19.627534 |
| O  | 7.929884   | -7.522426  | 17.750897 |
| O  | 9.581117   | -6.954367  | 15.538808 |
| Ti | 8.016614   | -8.120135  | 15.920917 |
| O  | 7.694628   | -9.981098  | 15.830770 |
| O  | 7.628318   | -9.567053  | 19.746432 |
| O  | 6.201629   | -7.294942  | 20.531974 |
| Ti | 4.419609   | -6.773135  | 20.137017 |
| O  | 4.455873   | -6.713474  | 18.305763 |
| O  | 6.408266   | -7.289582  | 15.239702 |
| Ti | 4.682348   | -7.328821  | 16.436987 |
| Ti | -13.249322 | -1.669777  | 16.364797 |
| O  | -13.591001 | -1.785321  | 18.215936 |
| O  | -14.275449 | -3.303038  | 20.613103 |
| Ti | -13.092178 | -1.965427  | 20.016918 |
| O  | -12.840339 | -0.094488  | 20.385774 |
| O  | -13.082684 | 0.313006   | 16.015758 |

|    |            |            |           |
|----|------------|------------|-----------|
| O  | -11.596047 | -2.478440  | 16.164185 |
| Ti | -9.757092  | -2.901582  | 16.518198 |
| O  | -9.504590  | -2.982816  | 18.392578 |
| O  | -11.367700 | -2.501891  | 20.547808 |
| Ti | -9.599697  | -3.107525  | 20.239276 |
| O  | -7.684848  | -4.028553  | 20.750789 |
| O  | -7.799016  | -3.913706  | 16.188006 |
| Ti | -11.525401 | 1.299796   | 16.729932 |
| O  | -11.965635 | 2.175109   | 18.341975 |
| Ti | -11.418070 | 0.707763   | 19.481453 |
| O  | -10.971435 | -0.226067  | 17.874182 |
| O  | -9.881987  | 0.929238   | 20.497102 |
| O  | -9.736431  | 1.747238   | 16.227168 |
| O  | -8.606884  | -1.201186  | 16.251184 |
| Ti | -8.188917  | 0.760348   | 16.583813 |
| O  | -7.855115  | 0.748254   | 18.465158 |
| O  | -8.395760  | -1.551248  | 20.758514 |
| Ti | -8.069721  | 0.322688   | 20.306622 |
| O  | -6.875446  | 1.382089   | 21.377060 |
| O  | -6.002422  | -0.654368  | 19.905838 |
| O  | -6.117714  | -0.227363  | 16.581755 |
| O  | -6.847957  | 2.409560   | 16.333423 |
| O  | -5.095802  | 2.050706   | 19.016185 |
| Ti | -5.405942  | 1.513949   | 17.239147 |
| Ti | -5.224571  | 0.954333   | 20.521362 |
| Ti | -6.513581  | -2.572533  | 20.181825 |
| O  | -6.525041  | -2.842513  | 18.348490 |
| Ti | -6.542268  | -2.290228  | 16.538288 |
| Ti | -14.538614 | -8.279431  | 16.653326 |
| Ti | -14.902835 | -8.069168  | 19.499726 |
| O  | -15.606886 | -6.739720  | 15.883824 |
| Ti | -14.690413 | -4.921798  | 16.343210 |
| O  | -14.967890 | -4.735678  | 18.171605 |
| O  | -15.537157 | -6.556218  | 20.444427 |
| Ti | -14.409824 | -5.096557  | 19.962504 |
| O  | -13.713998 | -7.276748  | 18.250953 |
| O  | -14.642649 | -2.996957  | 15.859679 |
| O  | -12.982239 | -5.503186  | 15.961816 |
| Ti | -11.428656 | -6.571699  | 16.454516 |
| O  | -15.830879 | -8.786621  | 18.064554 |
| O  | -11.026824 | -5.768083  | 18.137719 |
| O  | -12.741468 | -5.698670  | 20.586672 |
| Ti | -11.126739 | -6.352719  | 19.876955 |
| Ti | -12.430584 | -10.339563 | 16.727078 |
| O  | -14.206299 | -10.163240 | 16.219121 |
| O  | -11.532966 | -8.285309  | 19.578891 |
| O  | -10.720155 | -10.565668 | 20.626829 |
| O  | -12.596138 | -11.019703 | 18.471750 |
| Ti | -12.337568 | -9.952764  | 19.961240 |
| O  | -14.038916 | -9.376783  | 20.567817 |
| O  | -12.240397 | -8.376716  | 16.655938 |
| O  | -7.909961  | -10.930508 | 15.840988 |

|    |            |            |           |
|----|------------|------------|-----------|
| O  | -7.867683  | -9.959655  | 20.591977 |
| O  | -9.294492  | -7.455435  | 20.370661 |
| Ti | -9.466513  | -9.331218  | 19.735264 |
| O  | -9.368397  | -9.458676  | 17.891194 |
| O  | -9.584983  | -7.524717  | 16.064816 |
| Ti | -9.437532  | -9.702759  | 15.892484 |
| O  | -10.929224 | -10.976845 | 15.903630 |
| O  | -10.170596 | -4.890042  | 15.936377 |
| O  | -9.953060  | -4.997283  | 20.749210 |
| O  | -6.515474  | -6.625612  | 20.947617 |
| Ti | -8.070371  | -5.908008  | 20.156879 |
| O  | -8.010805  | -5.928245  | 18.269534 |
| O  | -6.796465  | -6.969645  | 15.651711 |
| Ti | -8.253551  | -5.938063  | 16.382780 |
| O  | -4.703321  | -2.515142  | 16.189211 |
| Ti | -3.201823  | -3.569475  | 16.643895 |
| O  | -3.304041  | -3.533457  | 18.539910 |
| O  | -4.931456  | -2.951713  | 21.119307 |
| Ti | -3.322287  | -3.606866  | 20.406026 |
| O  | -3.533973  | 0.516250   | 21.102334 |
| O  | -3.730284  | 1.504499   | 16.517440 |
| O  | -1.932833  | -1.902196  | 16.360000 |
| Ti | -2.307147  | 0.166454   | 16.391918 |
| O  | -2.213283  | -0.074284  | 18.349751 |
| O  | -2.110572  | -2.030314  | 20.806423 |
| Ti | -1.968361  | -0.164314  | 20.182926 |
| O  | -0.713837  | 1.168667   | 20.887785 |
| O  | -0.822168  | 1.574896   | 16.386184 |
| Ti | -4.996048  | -7.146829  | 16.522915 |
| O  | -5.139284  | -6.358389  | 18.226543 |
| Ti | -4.949689  | -6.958845  | 19.989487 |
| Ti | -6.267617  | -10.896832 | 16.686950 |
| O  | -5.343834  | -8.841435  | 19.462567 |
| O  | -6.549323  | -11.514148 | 18.445643 |
| Ti | -6.217336  | -10.472605 | 19.928336 |
| O  | -5.732455  | -9.051198  | 16.505622 |
| O  | -3.739580  | -5.511913  | 16.194482 |
| O  | -3.769168  | -5.529203  | 20.714064 |

48c-like 3-D (1,2,3)-mer

|    |           |           |           |
|----|-----------|-----------|-----------|
| O  | 1.232729  | 0.368947  | 1.684495  |
| O  | 1.599198  | 0.496205  | -2.755506 |
| O  | 3.289578  | 4.008748  | 1.261657  |
| O  | 3.227317  | 3.800704  | -1.646291 |
| O  | 4.390229  | 6.467823  | -0.600255 |
| Ti | 3.966824  | 5.483871  | -2.087046 |
| Ti | 4.153783  | 5.758052  | 1.148419  |
| Ti | 2.536602  | 2.057213  | 1.519569  |
| O  | 2.858942  | 1.366690  | -0.212640 |
| Ti | 2.767003  | 1.897559  | -1.994000 |
| O  | -1.815704 | -6.701318 | 1.626036  |
| O  | 1.442242  | -5.658687 | -3.199833 |

|    |           |           |           |
|----|-----------|-----------|-----------|
| O  | 1.273993  | -6.421003 | 1.418347  |
| O  | -0.459854 | -3.238762 | 1.746112  |
| Ti | -0.382687 | -5.271046 | 1.490512  |
| O  | -0.054857 | -5.122235 | -0.445826 |
| O  | 0.120652  | -3.110526 | -2.734681 |
| Ti | -0.124888 | -5.033434 | -2.294969 |
| O  | -1.405697 | -6.359717 | -3.015811 |
| O  | 2.133660  | -2.664135 | 2.068682  |
| Ti | 0.596289  | -1.533239 | 1.199146  |
| O  | 1.402030  | -1.591202 | -0.555511 |
| O  | 2.830990  | -1.966122 | -3.344091 |
| Ti | 1.293390  | -1.462802 | -2.417884 |
| O  | 4.386649  | 1.659583  | -2.955900 |
| Ti | 5.921498  | 0.886544  | -2.238283 |
| O  | 5.862849  | 1.078660  | -0.368870 |
| O  | 4.428400  | 2.090521  | 2.277305  |
| Ti | 6.009657  | 1.265454  | 1.536833  |
| O  | 7.860340  | 0.242232  | 2.131072  |
| O  | 7.841589  | -0.039719 | -2.862987 |
| O  | 5.666106  | 5.941845  | 2.163839  |
| O  | 5.651262  | 4.955694  | -2.759948 |
| O  | 7.345003  | 2.372312  | -2.212746 |
| Ti | 7.047483  | 4.241715  | -1.719219 |
| O  | 6.925692  | 4.538457  | 0.077262  |
| O  | 7.484578  | 2.680914  | 1.585924  |
| Ti | 7.130284  | 4.702797  | 2.155909  |
| O  | 8.658413  | 5.978989  | 2.178883  |
| O  | 10.200984 | 3.398872  | 2.175780  |
| O  | 9.346182  | 2.809441  | -0.584438 |
| O  | 8.680449  | 4.960055  | -2.484786 |
| O  | 10.370855 | 5.715568  | -0.178363 |
| Ti | 10.066147 | 4.383581  | -1.424875 |
| O  | 11.753937 | 3.780997  | -1.983554 |
| Ti | 10.280123 | 5.368886  | 1.654058  |
| O  | 12.075578 | 5.261305  | 2.122379  |
| Ti | 12.426523 | 3.319769  | 2.023146  |
| Ti | 12.656920 | 2.603468  | -0.823951 |
| O  | 13.220993 | 1.562049  | 2.625863  |
| Ti | 11.950436 | 0.054169  | 2.018887  |
| O  | 12.172551 | -0.382209 | 0.124615  |
| O  | 13.453259 | 1.229927  | -1.805364 |
| Ti | 12.189841 | -0.216081 | -1.710535 |
| O  | 11.405713 | 1.984739  | 0.622224  |
| O  | 11.834612 | -1.903738 | 2.227129  |
| O  | 10.230772 | 0.591238  | 2.720084  |
| Ti | 9.223177  | 1.677118  | 1.280424  |
| O  | 13.603519 | 3.520604  | 0.463478  |
| O  | 8.906421  | 0.162109  | -0.061257 |
| O  | 10.670119 | 0.732093  | -2.381047 |
| Ti | 8.958979  | 1.034275  | -1.702924 |
| Ti | 4.358474  | -2.348167 | -2.301689 |
| O  | 4.088938  | -1.853019 | -0.519219 |

|    |            |           |           |
|----|------------|-----------|-----------|
| Ti | 4.094199   | -2.295719 | 1.333944  |
| Ti | 3.165731   | -5.955027 | -2.556925 |
| O  | 3.846609   | -4.318789 | 0.885419  |
| O  | 4.709510   | -7.028808 | 1.319552  |
| O  | 2.907620   | -6.807464 | -0.941437 |
| Ti | 3.096751   | -6.088589 | 0.810086  |
| O  | 3.895281   | -4.245851 | -2.217042 |
| Ti | 9.353701   | -6.460174 | 1.052414  |
| O  | 9.731015   | -7.279644 | -0.630590 |
| Ti | 9.398283   | -5.722647 | -1.684913 |
| O  | 9.356268   | -4.683295 | -0.068129 |
| O  | 7.885190   | -5.767738 | -2.765562 |
| O  | 7.535627   | -6.396852 | 1.241249  |
| O  | 6.254253   | -3.354485 | 1.575491  |
| Ti | 5.941493   | -5.326412 | 1.153050  |
| O  | 5.944907   | -5.296663 | -0.761241 |
| O  | 6.283882   | -3.351790 | -3.110832 |
| Ti | 6.044415   | -5.226799 | -2.594330 |
| O  | 4.801970   | -6.452388 | -3.407386 |
| O  | 5.562229   | -0.917065 | -2.892316 |
| O  | 5.508325   | -0.741659 | 1.610149  |
| Ti | 10.743716  | -3.532284 | 1.574355  |
| O  | 11.649305  | -3.384478 | -0.116062 |
| O  | 12.183811  | -1.872739 | -2.558469 |
| Ti | 11.007316  | -3.204995 | -1.847894 |
| O  | 10.870647  | -4.966239 | -2.574471 |
| O  | 10.767481  | -5.523685 | 2.054829  |
| O  | 9.147165   | -2.512194 | 1.668065  |
| Ti | 7.503311   | -1.687967 | 1.288757  |
| O  | 7.075012   | -1.988176 | -0.568421 |
| O  | 9.289710   | -2.521224 | -2.328234 |
| Ti | 7.477292   | -1.970295 | -2.353435 |
| Ti | -9.351046  | 2.291536  | -0.966431 |
| O  | -10.109288 | 2.352307  | 0.857840  |
| O  | -11.907843 | 1.879490  | 2.911267  |
| Ti | -10.272807 | 2.998723  | 2.594566  |
| O  | -9.798014  | 4.822478  | 2.730340  |
| O  | -9.332900  | 4.193334  | -1.119175 |
| O  | -7.891067  | 1.995103  | -2.258676 |
| Ti | -6.486742  | 1.424518  | -1.205541 |
| O  | -7.700332  | 1.490172  | 0.313263  |
| O  | -8.745324  | 2.013551  | 3.392681  |
| Ti | -6.993490  | 1.940952  | 2.192732  |
| O  | -5.352433  | 0.810538  | 1.579043  |
| O  | -4.514486  | 0.556757  | -1.216490 |
| Ti | -7.885082  | 5.026937  | -0.306321 |
| O  | -8.244485  | 6.367197  | 0.940474  |
| Ti | -7.944257  | 5.328850  | 2.546836  |
| O  | -7.436406  | 3.806900  | 1.238987  |
| O  | -6.337663  | 6.164167  | 3.148542  |
| O  | -6.571780  | 5.348639  | -1.553622 |
| O  | -5.189732  | 2.937126  | -1.217427 |

|    |            |           |           |
|----|------------|-----------|-----------|
| Ti | -4.778309  | 4.925931  | -1.004029 |
| O  | -4.822962  | 5.243829  | 0.786511  |
| O  | -5.485288  | 3.268865  | 2.667902  |
| Ti | -4.625804  | 5.457385  | 2.726138  |
| O  | -3.143626  | 6.651382  | 2.897640  |
| O  | -3.014601  | 3.906493  | 2.389990  |
| O  | -2.797818  | 3.922625  | -1.042543 |
| O  | -3.681067  | 6.290421  | -1.845776 |
| O  | -1.633879  | 6.020401  | 0.465735  |
| Ti | -1.997018  | 5.668464  | -1.298682 |
| Ti | -1.732430  | 5.541432  | 2.325362  |
| Ti | -3.879049  | 1.940241  | 2.375601  |
| O  | -2.638792  | 1.724127  | 0.776504  |
| Ti | -3.214502  | 2.023519  | -1.064946 |
| Ti | -11.848176 | -3.614395 | -0.651168 |
| Ti | -12.641863 | -3.738384 | 2.130861  |
| O  | -12.004335 | -1.969174 | -1.475102 |
| Ti | -11.236848 | -0.290147 | -0.898987 |
| O  | -12.407492 | 0.135270  | 0.499082  |
| O  | -12.757383 | -1.862567 | 2.497769  |
| Ti | -11.883498 | -0.021811 | 2.294383  |
| O  | -10.847036 | -3.670952 | 0.999825  |
| O  | -10.777315 | 1.271421  | -1.782303 |
| O  | -9.498463  | -0.965764 | -0.610101 |
| Ti | -7.777543  | -1.743342 | -0.729141 |
| O  | -13.402346 | -4.022890 | 0.426289  |
| O  | -7.024474  | -1.554772 | 0.953775  |
| O  | -10.132026 | -0.700490 | 2.261825  |
| Ti | -8.529521  | -1.733002 | 2.512757  |
| Ti | -9.236325  | -5.217224 | -1.006108 |
| O  | -10.987447 | -4.871180 | -1.741586 |
| O  | -9.547351  | -3.417318 | 3.055092  |
| O  | -7.734238  | -5.368157 | 2.447790  |
| O  | -9.619919  | -6.219716 | 0.510784  |
| Ti | -9.668721  | -5.240102 | 2.148414  |
| O  | -11.705975 | -5.266913 | 2.886879  |
| O  | -8.607977  | -3.518995 | -0.599006 |
| O  | -4.800592  | -5.384045 | -2.737130 |
| O  | -4.761078  | -6.367487 | 2.337859  |
| O  | -6.811304  | -2.863255 | 2.885069  |
| Ti | -5.900357  | -4.653530 | 2.398467  |
| O  | -5.510139  | -4.938534 | 0.374335  |
| O  | -6.095086  | -2.940845 | -1.516447 |
| Ti | -6.041596  | -4.852456 | -1.440731 |
| O  | -7.648841  | -5.816038 | -1.816711 |
| O  | -6.683777  | -0.521580 | -1.789872 |
| O  | -7.333295  | -0.102150 | 2.915395  |
| O  | -4.274543  | -3.144101 | 2.516461  |
| Ti | -5.372367  | -1.202413 | 2.393217  |
| O  | -4.181368  | -1.543776 | 0.617760  |
| O  | -3.441832  | -1.796575 | -2.416733 |
| Ti | -4.774338  | -1.397108 | -1.225602 |

|    |           |           |           |
|----|-----------|-----------|-----------|
| O  | -2.083183 | 1.719410  | -2.534317 |
| Ti | -0.288095 | 1.288483  | -2.103446 |
| O  | -0.313449 | 1.382979  | -0.268259 |
| O  | -2.035764 | 1.784037  | 3.351765  |
| Ti | -0.655613 | 1.482136  | 1.699563  |
| O  | 0.052192  | 6.121038  | 2.680914  |
| O  | -0.551223 | 5.512353  | -2.432873 |
| O  | 0.860916  | 2.912362  | -2.422918 |
| Ti | 1.116174  | 4.779525  | -1.814624 |
| O  | 1.054380  | 4.875102  | 0.013089  |
| O  | 0.677769  | 3.036909  | 1.961234  |
| Ti | 1.474226  | 5.197335  | 1.952699  |
| O  | 2.718400  | 6.670926  | 1.851323  |
| O  | 2.313558  | 6.047296  | -2.722268 |
| Ti | -1.616343 | -2.165632 | -1.932800 |
| O  | -1.289684 | -1.851324 | -0.140011 |
| Ti | -2.496093 | -2.397742 | 1.526939  |
| Ti | -2.994077 | -5.788633 | -2.249536 |
| O  | -2.742164 | -4.240557 | 0.743292  |
| O  | -3.420297 | -6.843255 | -0.761659 |
| Ti | -3.483504 | -5.963371 | 0.911645  |
| O  | -2.251788 | -4.076567 | -2.013549 |
| O  | -0.664598 | -0.618374 | -2.702894 |
| O  | -1.314869 | -0.540448 | 1.856648  |
| O  | 0.122777  | -1.207095 | 7.699639  |
| O  | 0.309639  | -1.530799 | 3.656262  |
| O  | 1.815555  | 1.816014  | 7.619725  |
| O  | 2.467122  | 1.806521  | 3.803815  |
| O  | 4.185244  | 2.878169  | 5.926676  |
| Ti | 3.893536  | 3.264960  | 4.113955  |
| Ti | 3.822613  | 2.667188  | 7.852693  |
| Ti | 2.038319  | -0.080451 | 7.658059  |
| O  | 1.939161  | -0.551861 | 5.799125  |
| Ti | 1.791212  | -0.152294 | 3.979718  |
| O  | -2.614285 | -7.821809 | 8.017788  |
| O  | -0.067111 | -7.959344 | 3.401139  |
| O  | 0.271273  | -8.119128 | 7.618653  |
| O  | -1.803513 | -4.838707 | 7.935530  |
| Ti | -1.211322 | -6.717686 | 7.361783  |
| O  | -1.224609 | -6.614470 | 5.563255  |
| O  | -1.686152 | -4.910058 | 3.372016  |
| Ti | -1.753585 | -7.148595 | 3.717914  |
| O  | -3.089946 | -8.529393 | 3.509666  |
| O  | 1.116198  | -3.669374 | 8.398009  |
| Ti | -0.839541 | -3.063211 | 7.416478  |
| O  | 0.082657  | -3.485729 | 5.800909  |
| O  | 0.895780  | -4.816841 | 3.305268  |
| Ti | -0.376007 | -3.401574 | 4.002331  |
| O  | 3.359800  | -0.695764 | 2.895859  |
| Ti | 5.161672  | -0.786218 | 3.825090  |
| O  | 4.679500  | -0.668865 | 5.584576  |
| O  | 4.077596  | 0.568886  | 7.765258  |



|    |           |           |          |
|----|-----------|-----------|----------|
| Ti | 5.674720  | -0.517912 | 7.232345 |
| O  | 7.451519  | -1.736840 | 7.909619 |
| O  | 7.085366  | -1.695031 | 3.563357 |
| O  | 5.558444  | 3.166228  | 8.860423 |
| O  | 5.684841  | 3.904041  | 3.636807 |
| O  | 6.085300  | 1.058669  | 3.877521 |
| Ti | 6.954319  | 2.688674  | 4.665135 |
| O  | 7.004308  | 3.154949  | 6.449356 |
| O  | 6.828695  | 0.996746  | 8.138396 |
| Ti | 7.453530  | 3.100873  | 8.350409 |
| O  | 8.695139  | 4.576149  | 8.529156 |
| O  | 9.336807  | 2.040214  | 7.596687 |
| O  | 8.749074  | 1.636625  | 4.629244 |
| O  | 8.288913  | 3.958724  | 3.770424 |
| O  | 10.130245 | 4.517630  | 5.771128 |
| Ti | 10.054698 | 3.171340  | 4.411699 |
| O  | 12.081016 | 3.287012  | 4.037185 |
| Ti | 10.106935 | 3.896239  | 7.509503 |
| O  | 11.788218 | 3.349801  | 8.052598 |
| Ti | 11.787508 | 1.465885  | 7.525826 |
| Ti | 12.707574 | 1.464039  | 4.721053 |
| O  | 12.999195 | -0.086442 | 8.267109 |
| Ti | 11.971902 | -1.752149 | 7.558218 |
| O  | 12.656805 | -2.273898 | 5.960406 |
| O  | 12.638346 | -0.354652 | 4.088372 |
| Ti | 11.595695 | -2.093985 | 4.318085 |
| O  | 10.936153 | 1.609452  | 5.649354 |
| O  | 10.986788 | -3.389587 | 8.005628 |
| O  | 10.523536 | -0.482399 | 7.345351 |
| Ti | 8.646156  | 0.089473  | 7.520389 |
| O  | 13.454922 | 1.573235  | 6.371368 |
| O  | 7.478995  | -0.261172 | 5.939029 |
| O  | 9.880556  | -1.449925 | 4.742763 |
| Ti | 8.496481  | -0.289769 | 4.124112 |
| Ti | 2.783997  | -3.852424 | 3.654952 |
| O  | 2.814458  | -3.473142 | 5.530111 |
| Ti | 3.076175  | -3.554182 | 7.389802 |
| Ti | 1.590699  | -7.065021 | 3.488295 |
| O  | 2.757420  | -5.607868 | 7.519472 |
| O  | 3.552199  | -8.471607 | 7.286861 |
| O  | 1.525628  | -6.691792 | 5.388747 |
| Ti | 1.970562  | -7.387729 | 7.013026 |
| O  | 3.249790  | -5.643207 | 3.078008 |
| Ti | 8.445628  | -7.954967 | 7.032735 |
| O  | 8.645231  | -9.205024 | 5.614958 |
| Ti | 8.116156  | -7.988038 | 4.217416 |
| O  | 8.586583  | -6.552326 | 5.471936 |
| O  | 6.405271  | -8.292602 | 3.668132 |
| O  | 6.617844  | -7.576778 | 7.120451 |
| O  | 5.277929  | -5.009683 | 7.784383 |
| Ti | 4.870956  | -6.851748 | 7.090255 |
| O  | 4.566082  | -6.633982 | 5.311246 |

|    |            |           |          |
|----|------------|-----------|----------|
| O  | 5.862348   | -5.492335 | 3.251369 |
| Ti | 4.723593   | -7.273097 | 3.445135 |
| O  | 3.062540   | -8.276433 | 3.381896 |
| O  | 4.563638   | -2.861463 | 3.441130 |
| O  | 4.790510   | -2.375527 | 7.680746 |
| Ti | 10.097749  | -5.093114 | 7.425644 |
| O  | 10.849704  | -5.398341 | 5.768045 |
| O  | 11.201900  | -3.866527 | 3.733691 |
| Ti | 9.925002   | -5.444990 | 4.043101 |
| O  | 9.416350   | -7.371935 | 2.984015 |
| O  | 9.951539   | -7.042953 | 7.971839 |
| O  | 8.324441   | -4.483291 | 7.616529 |
| Ti | 6.654380   | -3.593419 | 7.398684 |
| O  | 6.300036   | -3.424854 | 5.597924 |
| O  | 8.400801   | -4.428707 | 3.722239 |
| Ti | 6.580911   | -3.767459 | 3.747104 |
| Ti | -11.660314 | 1.460493  | 5.005399 |
| O  | -12.281393 | 2.030217  | 6.669335 |
| O  | -12.941767 | 0.263901  | 8.565044 |
| Ti | -11.488578 | 1.686822  | 8.359117 |
| O  | -10.421066 | 3.240974  | 9.092573 |
| O  | -10.750604 | 3.260771  | 4.751809 |
| O  | -10.196570 | 0.329995  | 5.136036 |
| Ti | -8.232362  | 0.424070  | 4.811202 |
| O  | -6.818952  | 0.068106  | 6.299212 |
| O  | -9.965833  | 0.642733  | 8.341928 |
| Ti | -7.996487  | 0.440921  | 8.029148 |
| O  | -6.378981  | -0.921923 | 8.385139 |
| O  | -5.404459  | -1.473577 | 4.528228 |
| Ti | -9.024599  | 3.500598  | 5.595729 |
| O  | -9.192376  | 4.575609  | 7.065243 |
| Ti | -8.487179  | 3.895865  | 8.747101 |
| O  | -8.564734  | 1.836930  | 6.434940 |
| O  | -7.020067  | 5.024812  | 8.912438 |
| O  | -7.637667  | 4.324038  | 4.453854 |
| O  | -6.491681  | 1.637664  | 4.390965 |
| Ti | -5.793683  | 3.533787  | 4.943479 |
| O  | -5.905544  | 3.518150  | 6.737520 |
| O  | -7.311932  | 2.231600  | 8.731604 |
| Ti | -5.422131  | 3.903037  | 8.645879 |
| O  | -3.752619  | 4.767673  | 8.596971 |
| O  | -4.546571  | 2.033856  | 8.583484 |
| O  | -4.129355  | 2.050936  | 4.672183 |
| O  | -4.222484  | 4.734560  | 4.669967 |
| O  | -2.311249  | 3.289993  | 6.455157 |
| Ti | -2.612966  | 3.466786  | 4.683062 |
| Ti | -2.154001  | 3.718381  | 8.356719 |
| Ti | -4.673798  | 0.074231  | 8.652451 |
| O  | -3.820031  | 0.086320  | 6.849251 |
| Ti | -4.984134  | 0.304554  | 5.303552 |
| Ti | -14.151096 | -5.035577 | 5.225457 |
| Ti | -14.426636 | -5.162781 | 8.117791 |

|    |            |           |          |
|----|------------|-----------|----------|
| O  | -13.959784 | -3.612109 | 3.940119 |
| Ti | -13.076800 | -1.851302 | 4.675918 |
| O  | -14.060464 | -1.574180 | 6.240394 |
| O  | -14.414293 | -3.225238 | 8.430290 |
| Ti | -13.308903 | -1.574321 | 8.002035 |
| O  | -12.944211 | -4.794403 | 6.709344 |
| O  | -12.898622 | 0.035777  | 4.228698 |
| O  | -11.404366 | -2.544285 | 5.047154 |
| Ti | -9.662887  | -3.356765 | 5.142049 |
| O  | -15.491198 | -5.421835 | 6.554761 |
| O  | -8.452591  | -2.945349 | 6.762318 |
| O  | -11.553636 | -2.204752 | 7.839994 |
| Ti | -9.963696  | -3.132001 | 8.352417 |
| Ti | -11.411582 | -6.431893 | 4.571890 |
| O  | -13.444118 | -6.416237 | 4.321917 |
| O  | -11.144001 | -4.738736 | 8.744386 |
| O  | -10.120732 | -7.274939 | 8.276079 |
| O  | -11.701196 | -7.570582 | 5.998998 |
| Ti | -11.494450 | -6.282437 | 7.449713 |
| O  | -13.214577 | -6.624117 | 8.672879 |
| O  | -10.659504 | -5.023881 | 5.795549 |
| O  | -6.566636  | -7.561828 | 4.007996 |
| O  | -6.370348  | -7.487501 | 8.128905 |
| O  | -8.335123  | -4.534938 | 8.569430 |
| Ti | -8.138293  | -6.610679 | 8.367705 |
| O  | -8.214299  | -6.678816 | 6.410544 |
| O  | -7.957891  | -4.534338 | 4.920008 |
| Ti | -7.939517  | -6.488653 | 4.574743 |
| O  | -9.731648  | -6.804662 | 3.616532 |
| O  | -8.412646  | -1.639144 | 4.698976 |
| O  | -8.800954  | -1.503979 | 8.732623 |
| O  | -5.580660  | -4.151659 | 9.093713 |
| Ti | -6.955049  | -2.895914 | 8.339664 |
| O  | -5.551227  | -2.977030 | 6.824659 |
| O  | -5.392421  | -4.411268 | 4.442977 |
| Ti | -6.653237  | -2.960669 | 5.178733 |
| O  | -3.769497  | -0.093520 | 3.367881 |
| Ti | -1.656354  | -0.274687 | 3.963260 |
| O  | -1.540457  | -0.345780 | 5.801966 |
| O  | -2.902107  | 0.374881  | 9.686377 |
| Ti | -1.708973  | -0.081145 | 7.718307 |
| O  | -0.572777  | 4.722308  | 8.404517 |
| O  | -0.943408  | 4.185727  | 3.879231 |
| O  | 0.066543   | 1.111143  | 3.905049 |
| Ti | 0.688092   | 3.088993  | 4.305337 |
| O  | 0.734373   | 3.401396  | 6.076250 |
| O  | -1.167679  | 1.735875  | 8.152939 |
| Ti | 0.984312   | 3.645268  | 8.063005 |
| O  | 2.782055   | 4.239918  | 8.242552 |
| O  | 2.296972   | 4.364141  | 3.759246 |
| Ti | -3.388399  | -4.054900 | 4.387137 |
| O  | -2.692849  | -3.431010 | 6.065544 |

|    |           |           |           |
|----|-----------|-----------|-----------|
| Ti | -3.876493 | -3.866116 | 7.812766  |
| Ti | -4.608285 | -7.622669 | 4.158714  |
| O  | -4.294912 | -5.703864 | 7.372364  |
| O  | -4.731966 | -8.491985 | 5.863936  |
| Ti | -4.560671 | -7.583577 | 7.456393  |
| O  | -3.524546 | -6.057258 | 4.598674  |
| O  | -2.226916 | -2.336531 | 3.676380  |
| O  | -2.623100 | -1.986612 | 8.055449  |
| O  | 0.015127  | -2.787067 | 14.113164 |
| O  | -0.878316 | -3.137600 | 9.714071  |
| O  | 1.959562  | 0.336646  | 12.404741 |
| O  | 1.335042  | 0.207296  | 9.737249  |
| O  | 2.889362  | 2.771687  | 12.429580 |
| Ti | 2.213865  | 1.717205  | 10.962581 |
| Ti | 2.924500  | 1.532020  | 13.861711 |
| Ti | 1.580797  | -1.481154 | 13.304710 |
| O  | 1.146268  | -2.326822 | 11.606893 |
| Ti | 0.809251  | -1.879229 | 9.832728  |
| O  | -4.170915 | -9.405094 | 14.121457 |
| O  | -1.291511 | -9.333184 | 9.735210  |
| O  | -1.128290 | -9.519290 | 13.821275 |
| O  | -2.417094 | -5.994732 | 14.177572 |
| Ti | -2.633875 | -8.021574 | 13.872275 |
| O  | -2.854835 | -8.241799 | 12.003340 |
| O  | -3.157562 | -6.333684 | 10.252314 |
| Ti | -2.862172 | -8.365891 | 10.092817 |
| O  | -4.592930 | -8.844821 | 9.322489  |
| O  | 1.273344  | -5.006189 | 14.125144 |
| Ti | -0.702043 | -4.763420 | 13.781074 |
| O  | -1.022368 | -4.950244 | 11.927725 |
| O  | -0.147223 | -6.128935 | 9.202821  |
| Ti | -1.609310 | -5.055769 | 10.160008 |
| O  | 2.685372  | -1.789630 | 8.760123  |
| Ti | 4.389085  | -2.259657 | 9.897025  |
| O  | 3.683103  | -1.973723 | 11.610262 |
| O  | 3.541165  | -0.571619 | 13.941639 |
| Ti | 4.844514  | -2.044475 | 13.186256 |
| O  | 6.538509  | -3.478944 | 13.598206 |
| O  | 6.251930  | -3.442472 | 9.682143  |
| O  | 4.819577  | 1.924331  | 14.439007 |
| O  | 3.869652  | 1.679043  | 10.006946 |
| O  | 5.652014  | -0.647680 | 9.685877  |
| Ti | 5.826131  | 1.371328  | 10.054620 |
| O  | 6.187012  | 1.504747  | 11.914406 |
| O  | 6.131150  | -0.519057 | 13.801440 |
| Ti | 6.550460  | 1.503916  | 13.770253 |
| O  | 8.177215  | 2.403260  | 14.313750 |
| O  | 8.665677  | 0.038417  | 12.687677 |
| O  | 8.767227  | -0.322909 | 9.607439  |
| O  | 7.917843  | 2.125782  | 10.128371 |
| O  | 10.061923 | 2.359039  | 12.190604 |
| Ti | 9.493185  | 1.171288  | 10.824897 |

|    |           |            |           |
|----|-----------|------------|-----------|
| O  | 11.166721 | 1.267124   | 9.609748  |
| Ti | 9.660264  | 1.415290   | 13.798656 |
| O  | 11.683482 | 1.160910   | 14.056118 |
| Ti | 12.227136 | -0.194124  | 13.007255 |
| Ti | 12.406106 | -0.167250  | 10.168545 |
| O  | 12.222184 | -1.719325  | 14.163432 |
| Ti | 11.148916 | -3.462664  | 13.505898 |
| O  | 11.855877 | -3.698505  | 11.813172 |
| O  | 12.232039 | -2.048486  | 9.700031  |
| Ti | 10.846782 | -3.456328  | 10.181752 |
| O  | 10.919072 | -0.425805  | 11.613440 |
| O  | 10.826326 | -5.321794  | 13.989871 |
| O  | 9.506198  | -2.649585  | 13.311255 |
| Ti | 7.833349  | -1.708837  | 13.282842 |
| O  | 13.553239 | 0.082263   | 11.666123 |
| O  | 6.488328  | -1.890073  | 11.723600 |
| O  | 9.120518  | -2.826793  | 10.531482 |
| Ti | 7.550860  | -1.849240  | 10.031759 |
| Ti | 1.762645  | -5.322887  | 9.494298  |
| O  | 1.931321  | -5.165193  | 11.340099 |
| Ti | 2.909669  | -5.445906  | 12.928585 |
| Ti | 0.526184  | -8.715686  | 9.660495  |
| O  | 2.132065  | -7.293975  | 13.437982 |
| O  | 2.099268  | -9.967632  | 13.380626 |
| O  | 0.354452  | -8.177554  | 11.501699 |
| Ti | 0.553955  | -8.670186  | 13.273980 |
| O  | 2.142364  | -7.298711  | 9.271809  |
| Ti | 7.053569  | -9.163971  | 12.965284 |
| O  | 7.424122  | -9.843258  | 11.326588 |
| Ti | 6.539072  | -8.489890  | 10.172072 |
| O  | 6.389068  | -7.516780  | 12.173479 |
| O  | 5.324584  | -9.746671  | 9.422443  |
| O  | 5.249997  | -10.021126 | 13.301146 |
| O  | 4.508073  | -6.885042  | 13.789525 |
| Ti | 3.711995  | -8.732505  | 13.089719 |
| O  | 3.678372  | -8.447437  | 11.289457 |
| O  | 4.946668  | -7.165877  | 9.345858  |
| Ti | 3.580295  | -8.955871  | 9.380387  |
| O  | 1.937892  | -9.976122  | 9.440607  |
| O  | 3.615695  | -4.177609  | 9.520880  |
| O  | 3.940860  | -3.835372  | 13.616812 |
| Ti | 9.491840  | -6.676281  | 13.362314 |
| O  | 9.923373  | -7.171460  | 11.573466 |
| O  | 10.425289 | -5.269947  | 9.652145  |
| Ti | 9.141027  | -6.756082  | 9.927962  |
| O  | 8.193583  | -8.407338  | 9.079232  |
| O  | 8.819827  | -8.528787  | 13.719911 |
| O  | 7.968183  | -5.640757  | 13.225869 |
| Ti | 6.030709  | -5.576736  | 13.311657 |
| O  | 4.799693  | -5.201179  | 11.738310 |
| O  | 7.332110  | -6.123476  | 10.122206 |
| Ti | 5.466730  | -5.350501  | 9.930583  |

|    |            |           |           |
|----|------------|-----------|-----------|
| Ti | -12.809536 | 0.052611  | 10.721836 |
| O  | -13.242139 | 0.548196  | 12.509875 |
| O  | -13.742002 | -1.353372 | 14.432249 |
| Ti | -12.457793 | 0.132646  | 14.154717 |
| O  | -11.510261 | 1.784316  | 15.002171 |
| O  | -12.135162 | 1.903921  | 10.364434 |
| O  | -11.287450 | -0.985520 | 10.858891 |
| Ti | -9.350673  | -1.048960 | 10.770087 |
| O  | -8.117340  | -1.428738 | 12.341392 |
| O  | -10.648941 | -0.500239 | 13.959856 |
| Ti | -8.784149  | -1.275510 | 14.149528 |
| O  | -6.933539  | -2.448769 | 14.561715 |
| O  | -7.252107  | -2.797431 | 10.464568 |
| Ti | -10.368278 | 2.537898  | 11.118121 |
| O  | -10.737465 | 3.218809  | 12.756309 |
| Ti | -9.854332  | 1.864788  | 13.911275 |
| O  | -9.705760  | 0.890805  | 11.909605 |
| O  | -8.638431  | 3.121332  | 14.660368 |
| O  | -8.564149  | 3.394471  | 10.782172 |
| O  | -7.823692  | 0.256532  | 10.293308 |
| Ti | -7.027337  | 2.104022  | 10.992559 |
| O  | -6.992965  | 1.819286  | 12.792234 |
| O  | -8.262240  | 0.539830  | 14.734607 |
| Ti | -6.894996  | 2.329251  | 14.700854 |
| O  | -5.252377  | 3.349928  | 14.639543 |
| O  | -5.456207  | 0.672123  | 14.808798 |
| O  | -5.448398  | 0.664140  | 10.643614 |
| O  | -5.414391  | 3.338912  | 10.701017 |
| O  | -3.667892  | 1.549783  | 12.579083 |
| Ti | -3.869661  | 2.040376  | 10.806710 |
| Ti | -3.841045  | 2.089419  | 14.419861 |
| Ti | -5.079583  | -1.302959 | 14.586557 |
| O  | -5.250025  | -1.461977 | 12.741035 |
| Ti | -6.227309  | -1.183316 | 11.151573 |
| Ti | -15.544243 | -6.429596 | 11.078136 |
| Ti | -15.723265 | -6.455441 | 13.916581 |
| O  | -15.538208 | -4.904823 | 9.921263  |
| Ti | -14.464594 | -3.161421 | 10.578785 |
| O  | -15.172100 | -2.925161 | 12.271076 |
| O  | -15.548353 | -4.574450 | 14.385548 |
| Ti | -14.163063 | -3.167181 | 13.903115 |
| O  | -14.235878 | -6.197367 | 12.471767 |
| O  | -14.144052 | -1.302115 | 10.093844 |
| O  | -12.822225 | -3.974661 | 10.774031 |
| Ti | -11.150369 | -4.917643 | 10.799950 |
| O  | -16.870732 | -6.705120 | 12.418907 |
| O  | -9.804409  | -4.736790 | 12.359984 |
| O  | -12.437424 | -3.796927 | 13.553925 |
| Ti | -10.868222 | -4.776217 | 14.051422 |
| Ti | -12.977647 | -8.040391 | 10.286698 |
| O  | -15.001090 | -7.785387 | 10.029187 |
| O  | -12.084027 | -6.302273 | 14.476981 |

|    |            |           |           |
|----|------------|-----------|-----------|
| O  | -11.233760 | -8.749880 | 13.954838 |
| O  | -13.379350 | -8.983916 | 11.894177 |
| Ti | -12.810650 | -7.796074 | 13.259956 |
| O  | -14.484714 | -7.890995 | 14.474570 |
| O  | -11.983530 | -6.663323 | 11.396857 |
| O  | -8.135877  | -8.550397 | 9.642185  |
| O  | -7.186128  | -8.305530 | 14.074019 |
| O  | -8.968731  | -5.978461 | 14.397688 |
| Ti | -9.142407  | -7.997577 | 14.028337 |
| O  | -9.502461  | -8.132513 | 12.168319 |
| O  | -9.448816  | -6.108460 | 10.281678 |
| Ti | -9.866558  | -8.131053 | 10.312998 |
| O  | -11.494386 | -9.028605 | 9.771606  |
| O  | -9.854065  | -3.148030 | 10.484445 |
| O  | -9.568491  | -3.183403 | 14.400155 |
| O  | -6.001097  | -4.836526 | 15.321401 |
| Ti | -7.706408  | -4.366674 | 14.185956 |
| O  | -7.000979  | -4.655182 | 12.473146 |
| O  | -6.857504  | -6.056332 | 10.141275 |
| Ti | -8.161578  | -4.583731 | 10.896991 |
| O  | -4.589378  | -1.622674 | 9.955828  |
| Ti | -2.614485  | -1.865092 | 10.299522 |
| O  | -2.294562  | -1.676666 | 12.152771 |
| O  | -3.168805  | -0.500464 | 14.878899 |
| Ti | -1.706356  | -1.571833 | 13.920225 |
| O  | -2.023554  | 2.706254  | 14.345255 |
| O  | -2.187207  | 2.890267  | 10.258964 |
| O  | -0.900232  | -0.632952 | 9.904439  |
| Ti | -0.680949  | 1.393491  | 10.207713 |
| O  | -0.455694  | 1.616094  | 12.076229 |
| O  | -0.158362  | -0.293783 | 13.826963 |
| Ti | -0.453419  | 1.738411  | 13.987031 |
| O  | 1.276290   | 2.217196  | 14.758828 |
| O  | 0.855583   | 2.778203  | 9.957976  |
| Ti | -4.896609  | -5.146406 | 10.775141 |
| O  | -4.463599  | -4.300563 | 12.473059 |
| Ti | -4.125802  | -4.747845 | 14.247248 |
| Ti | -6.240080  | -8.158371 | 10.219663 |
| O  | -4.652272  | -6.833735 | 14.343533 |
| O  | -6.206231  | -9.397657 | 11.651782 |
| Ti | -5.530528  | -8.343589 | 13.119246 |
| O  | -5.273785  | -6.963952 | 11.676547 |
| O  | -3.330761  | -3.841063 | 9.966560  |
| O  | -2.437658  | -3.490129 | 14.365700 |
| O  | -1.089930  | -4.291600 | 20.405644 |
| O  | -0.692589  | -4.641905 | 16.025129 |
| O  | 0.207376   | -0.571566 | 19.481107 |
| O  | 0.981853   | -0.924782 | 16.705796 |
| O  | 1.414708   | 1.864490  | 18.216168 |
| Ti | 1.244754   | 0.955522  | 16.623943 |
| Ti | 1.291277   | 0.994076  | 19.921166 |
| Ti | 0.071582   | -2.574039 | 19.693469 |

|    |           |            |           |
|----|-----------|------------|-----------|
| O  | -0.621930 | -3.197752  | 18.014700 |
| Ti | 0.561551  | -2.761989  | 16.266255 |
| O  | -5.613250 | -10.991996 | 20.321607 |
| O  | -2.740862 | -11.348030 | 15.677444 |
| O  | -2.372847 | -10.813999 | 20.202221 |
| O  | -3.383526 | -7.738879  | 20.176279 |
| Ti | -4.004357 | -9.717092  | 19.775841 |
| O  | -4.049182 | -10.028061 | 18.004909 |
| O  | -2.149183 | -8.363923  | 15.927574 |
| Ti | -4.297481 | -10.270613 | 16.017612 |
| O  | -6.095817 | -10.865464 | 15.837479 |
| O  | 0.451932  | -6.533791  | 20.713549 |
| Ti | -1.660740 | -6.353308  | 20.118167 |
| O  | -1.775645 | -6.282270  | 18.279498 |
| O  | -0.414959 | -7.002806  | 14.392932 |
| Ti | -1.608022 | -6.546896  | 16.362944 |
| O  | 2.266436  | -2.479492  | 14.983952 |
| Ti | 3.639145  | -3.734620  | 15.741599 |
| O  | 2.235317  | -3.651249  | 17.256139 |
| O  | 2.075674  | -2.216684  | 19.638194 |
| Ti | 3.336965  | -3.667644  | 18.902781 |
| O  | 5.096148  | -4.989063  | 19.383440 |
| O  | 5.485381  | -5.124442  | 15.350987 |
| O  | 3.249793  | 0.934474   | 20.072936 |
| O  | 3.054688  | 0.861537   | 15.951981 |
| O  | 5.018182  | -2.094171  | 15.513042 |
| Ti | 4.821921  | -0.017566  | 15.714604 |
| O  | 4.897548  | 0.049583   | 17.671637 |
| O  | 4.641655  | -2.094198  | 19.162534 |
| Ti | 4.622055  | -0.140155  | 19.507633 |
| O  | 6.413965  | 0.176742   | 20.466533 |
| O  | 7.341815  | -1.604414  | 18.287473 |
| O  | 7.827327  | -1.888108  | 15.338164 |
| O  | 6.803462  | 0.647898   | 15.807070 |
| O  | 8.383089  | 0.942844   | 18.084011 |
| Ti | 8.176975  | -0.345146  | 16.634053 |
| O  | 9.897132  | -0.002372  | 15.410955 |
| Ti | 8.093384  | -0.196093  | 19.511321 |
| O  | 10.126230 | -0.210020  | 19.762185 |
| Ti | 10.834183 | -1.591162  | 18.859196 |
| Ti | 11.110155 | -1.463123  | 15.966747 |
| O  | 10.643588 | -3.014061  | 20.143199 |
| Ti | 9.760829  | -4.775518  | 19.408919 |
| O  | 10.745237 | -5.051710  | 17.844171 |
| O  | 11.099184 | -3.400295  | 15.654323 |
| Ti | 9.992881  | -5.050637  | 16.082594 |
| O  | 9.627808  | -1.832415  | 17.374679 |
| O  | 9.582182  | -6.662618  | 19.855840 |
| O  | 8.088131  | -4.082907  | 19.038671 |
| Ti | 6.346575  | -3.272035  | 18.940757 |
| O  | 12.174340 | -1.203252  | 17.530223 |
| O  | 5.136323  | -3.683412  | 17.320196 |



|    |            |            |           |
|----|------------|------------|-----------|
| O  | 8.237726   | -4.420643  | 16.244995 |
| Ti | 6.647287   | -3.495498  | 15.730417 |
| Ti | 1.356125   | -6.703709  | 15.428298 |
| O  | 0.503611   | -6.715127  | 17.231473 |
| Ti | 1.667042   | -6.932955  | 18.778181 |
| Ti | -1.158188  | -10.345282 | 15.724559 |
| O  | 0.813013   | -8.679404  | 19.410410 |
| O  | 0.906624   | -11.363218 | 19.412113 |
| O  | -1.003711  | -9.916245  | 17.626382 |
| Ti | -0.703559  | -10.095356 | 19.397979 |
| O  | 1.225487   | -8.664192  | 15.497277 |
| Ti | 5.708756   | -10.128561 | 18.488330 |
| O  | 5.877647   | -11.202554 | 17.018246 |
| Ti | 5.172969   | -10.522988 | 15.336296 |
| O  | 5.247091   | -8.465700  | 17.648253 |
| O  | 3.706294   | -11.652419 | 15.170149 |
| O  | 4.321062   | -10.953038 | 19.628554 |
| O  | 3.174984   | -8.265800  | 19.691555 |
| Ti | 2.477211   | -10.161810 | 19.138781 |
| O  | 2.588754   | -10.146020 | 17.344372 |
| O  | 3.994215   | -8.860146  | 15.351061 |
| Ti | 2.107480   | -10.531690 | 15.435977 |
| O  | 0.438262   | -11.397513 | 15.485110 |
| O  | 3.061715   | -5.708358  | 15.696686 |
| O  | 2.087365   | -5.154586  | 19.553154 |
| Ti | 8.344451   | -8.087507  | 19.078520 |
| O  | 8.967039   | -8.656689  | 17.415052 |
| O  | 9.625254   | -6.888474  | 15.519686 |
| Ti | 8.173935   | -8.313395  | 15.725261 |
| O  | 7.106308   | -9.867341  | 14.990886 |
| O  | 7.435351   | -9.888155  | 19.331966 |
| O  | 6.879672   | -6.958323  | 18.948560 |
| Ti | 4.915665   | -7.052538  | 19.271728 |
| O  | 3.502785   | -6.695968  | 17.783806 |
| O  | 6.649326   | -7.271643  | 15.744999 |
| Ti | 4.679482   | -7.069332  | 16.053595 |
| Ti | -13.413350 | -1.529544  | 16.658724 |
| O  | -14.165961 | -1.223159  | 18.316191 |
| O  | -14.515070 | -2.757762  | 20.350823 |
| Ti | -13.240087 | -1.177770  | 20.039870 |
| O  | -12.730845 | 0.749729   | 21.097880 |
| O  | -13.265972 | 0.419625   | 16.111516 |
| O  | -11.640824 | -2.141660  | 16.467866 |
| Ti | -9.970447  | -3.032250  | 16.683534 |
| O  | -9.613757  | -3.201596  | 18.484096 |
| O  | -11.715461 | -2.194815  | 20.358676 |
| Ti | -9.896643  | -2.857751  | 20.334270 |
| O  | -7.879403  | -3.764535  | 20.639583 |
| O  | -8.105951  | -4.250356  | 16.402345 |
| Ti | -11.759926 | 1.332573   | 17.049380 |
| O  | -11.959705 | 2.582584   | 18.467196 |
| Ti | -11.430385 | 1.365032   | 19.864165 |

|    |            |            |           |
|----|------------|------------|-----------|
| O  | -11.900499 | -0.070535  | 18.610084 |
| O  | -9.719559  | 1.669338   | 20.413861 |
| O  | -9.931852  | 0.956736   | 16.959673 |
| O  | -8.598146  | -1.614045  | 16.295765 |
| Ti | -8.186734  | 0.226395   | 16.990664 |
| O  | -7.884872  | 0.008423   | 18.769877 |
| O  | -9.178415  | -1.132201  | 20.830408 |
| Ti | -8.038730  | 0.647912   | 20.635945 |
| O  | -6.377180  | 1.650512   | 20.699256 |
| O  | -6.565579  | -0.982468  | 21.003451 |
| O  | -6.075436  | -1.019202  | 16.560408 |
| O  | -6.866380  | 1.845440   | 16.793936 |
| O  | -4.842840  | 0.065059   | 18.691809 |
| Ti | -5.285831  | 0.760437   | 17.066507 |
| Ti | -4.905898  | 0.438527   | 20.592689 |
| Ti | -6.099851  | -2.773010  | 20.426483 |
| O  | -6.129873  | -3.151831  | 18.551178 |
| Ti | -6.390768  | -3.072849  | 16.691453 |
| Ti | -15.105164 | -8.088878  | 16.558896 |
| Ti | -16.024305 | -8.086777  | 19.363937 |
| O  | -16.316173 | -6.536045  | 15.818244 |
| Ti | -15.287191 | -4.870947  | 16.527576 |
| O  | -15.971411 | -4.349427  | 18.125961 |
| O  | -15.954077 | -6.268138  | 19.998105 |
| Ti | -14.909005 | -4.530415  | 19.767811 |
| O  | -14.253296 | -8.232740  | 18.434858 |
| O  | -14.303120 | -3.233321  | 16.078951 |
| O  | -13.839691 | -6.141959  | 16.738729 |
| Ti | -11.962390 | -6.714251  | 16.563878 |
| O  | -16.772044 | -8.195479  | 17.713638 |
| O  | -10.790879 | -6.363627  | 18.144903 |
| O  | -13.194531 | -5.175367  | 19.341775 |
| Ti | -11.811231 | -6.336664  | 19.959839 |
| Ti | -13.424095 | -10.520109 | 16.573632 |
| O  | -15.105249 | -9.972869  | 16.032043 |
| O  | -12.065318 | -8.262018  | 19.452959 |
| O  | -11.605932 | -10.583928 | 20.312061 |
| O  | -13.447609 | -11.141989 | 18.311815 |
| Ti | -13.372001 | -9.795974  | 19.671558 |
| O  | -15.397943 | -9.910774  | 20.045833 |
| O  | -12.654143 | -8.664821  | 16.486650 |
| O  | -8.874421  | -9.792051  | 15.222321 |
| O  | -9.001546  | -10.529480 | 20.444711 |
| O  | -9.404404  | -7.683333  | 20.205127 |
| Ti | -10.271047 | -9.314746  | 19.417354 |
| O  | -10.320365 | -9.780678  | 17.633339 |
| O  | -10.145101 | -7.622335  | 15.944956 |
| Ti | -10.769993 | -9.725848  | 15.732450 |
| O  | -12.012560 | -11.200173 | 15.553554 |
| O  | -10.767215 | -4.888722  | 16.173321 |
| O  | -10.400396 | -4.929892  | 20.518673 |
| O  | -6.675681  | -5.930133  | 21.184903 |

|    |           |            |           |
|----|-----------|------------|-----------|
| Ti | -8.477260 | -5.839512  | 20.256922 |
| O  | -7.994192 | -5.960340  | 18.497743 |
| O  | -7.393267 | -7.195559  | 16.316334 |
| Ti | -8.990360 | -6.108446  | 16.850486 |
| O  | -4.431648 | -2.957777  | 15.683300 |
| Ti | -2.475659 | -3.564626  | 16.664378 |
| O  | -3.397725 | -3.142295  | 18.280657 |
| O  | -4.211580 | -1.809692  | 20.776462 |
| Ti | -2.941205 | -3.226673  | 20.079585 |
| O  | -3.248631 | 1.332927   | 20.677799 |
| O  | -3.586174 | 1.491850   | 16.461854 |
| O  | -1.510654 | -1.789773  | 16.144626 |
| Ti | -2.105367 | 0.089070   | 16.718631 |
| O  | -2.092491 | -0.015859  | 18.516980 |
| O  | -1.630081 | -1.718647  | 20.709222 |
| Ti | -1.563347 | 0.519475   | 20.362075 |
| O  | -0.227178 | 1.900585   | 20.569862 |
| O  | -0.701415 | 1.191176   | 16.061951 |
| Ti | -5.354334 | -6.545988  | 16.422944 |
| O  | -5.255280 | -6.073905  | 18.281990 |
| Ti | -5.108383 | -6.475877  | 20.100865 |
| Ti | -7.137021 | -9.294075  | 16.228670 |
| O  | -5.783892 | -8.434060  | 20.276685 |
| O  | -7.499762 | -9.505202  | 18.154700 |
| Ti | -7.209499 | -9.893021  | 19.967053 |
| O  | -5.130399 | -8.441629  | 16.462612 |
| O  | -3.438924 | -5.420026  | 16.381438 |
| O  | -3.626759 | -5.097274  | 20.424918 |
| O  | -2.651651 | -6.009953  | 26.783920 |
| O  | -2.003007 | -6.087474  | 22.225112 |
| O  | -1.065004 | -2.551276  | 26.094887 |
| O  | -0.576830 | -2.385831  | 23.337580 |
| O  | 0.103526  | 0.216025   | 24.842733 |
| Ti | 0.166521  | -0.663880  | 23.168579 |
| Ti | -0.323239 | -0.838425  | 26.329820 |
| Ti | -1.699362 | -4.462572  | 26.014958 |
| O  | -2.026505 | -4.776398  | 24.222210 |
| Ti | -0.820639 | -4.230424  | 22.555013 |
| O  | -5.630577 | -12.674621 | 26.803566 |
| O  | -3.368979 | -12.748754 | 21.400505 |
| O  | -2.765598 | -12.138301 | 26.514993 |
| O  | -4.179175 | -9.540239  | 26.504742 |
| Ti | -4.432558 | -11.407137 | 25.896483 |
| O  | -4.371749 | -11.502413 | 24.068651 |
| O  | -3.994655 | -9.665234  | 22.119789 |
| Ti | -4.791022 | -11.825071 | 22.128697 |
| O  | -6.035342 | -13.298655 | 22.229946 |
| O  | -1.233561 | -8.347154  | 26.616101 |
| Ti | -3.029179 | -7.916467  | 26.185156 |
| O  | -3.003507 | -8.011880  | 24.350046 |
| O  | -1.281622 | -8.412442  | 20.729844 |
| Ti | -2.661665 | -8.110137  | 22.381581 |

|    |           |            |           |
|----|-----------|------------|-----------|
| O  | 0.957558  | -3.484639  | 21.565497 |
| Ti | 2.055294  | -5.425892  | 21.688518 |
| O  | 0.864187  | -5.083593  | 23.464550 |
| O  | 0.126127  | -4.830461  | 26.499352 |
| Ti | 1.458053  | -5.229931  | 25.307713 |
| O  | 3.366206  | -6.105972  | 25.872881 |
| O  | 4.016724  | -6.526266  | 21.167003 |
| O  | 1.483250  | -1.242448  | 26.818692 |
| O  | 1.444486  | -0.261036  | 21.742269 |
| O  | 3.494032  | -3.765180  | 21.196829 |
| Ti | 2.582596  | -1.975947  | 21.683135 |
| O  | 2.192330  | -1.688930  | 23.705987 |
| O  | 2.778789  | -3.686107  | 25.598178 |
| Ti | 2.723349  | -1.774484  | 25.522047 |
| O  | 4.331188  | -0.811453  | 25.897729 |
| O  | 5.292770  | -3.109386  | 24.682687 |
| O  | 6.229850  | -3.210831  | 21.028071 |
| O  | 4.416329  | -1.261045  | 21.634450 |
| O  | 6.302251  | -0.407626  | 23.572109 |
| Ti | 6.350964  | -1.388290  | 21.933749 |
| O  | 8.388110  | -1.361352  | 21.196001 |
| Ti | 5.918516  | -1.409971  | 25.088894 |
| O  | 7.670258  | -1.755314  | 25.825869 |
| Ti | 8.531206  | -3.012465  | 24.735252 |
| Ti | 9.324489  | -2.888154  | 21.953230 |
| O  | 8.687143  | -4.658039  | 25.559262 |
| Ti | 7.920252  | -6.337575  | 24.983424 |
| O  | 9.089993  | -6.762591  | 23.586243 |
| O  | 9.440832  | -4.764446  | 21.587408 |
| Ti | 8.566972  | -6.605666  | 21.790125 |
| O  | 7.530116  | -2.956444  | 23.084009 |
| O  | 7.461649  | -7.898741  | 25.865518 |
| O  | 6.181086  | -5.664132  | 24.694789 |
| Ti | 4.460863  | -4.884287  | 24.811598 |
| O  | 10.085263 | -2.603641  | 23.658490 |
| O  | 3.708143  | -5.072928  | 23.128088 |
| O  | 6.815427  | -5.926835  | 21.822582 |
| Ti | 5.212877  | -4.895318  | 21.569107 |
| Ti | 0.561720  | -8.568087  | 21.705788 |
| O  | -0.678819 | -8.350502  | 23.305022 |
| Ti | -0.103444 | -8.650728  | 25.146292 |
| Ti | -1.584333 | -12.169505 | 21.756990 |
| O  | -0.519607 | -10.549875 | 25.122295 |
| O  | 0.363295  | -12.916861 | 25.929480 |
| O  | -1.683816 | -12.649594 | 23.616441 |
| Ti | -1.319876 | -12.295696 | 25.380451 |
| O  | -0.302022 | -10.534319 | 21.691514 |
| Ti | 4.569380  | -11.653901 | 24.389333 |
| O  | 4.930162  | -12.994050 | 23.143411 |
| Ti | 4.627990  | -11.956680 | 21.536560 |
| O  | 4.119783  | -10.434445 | 22.844114 |
| O  | 3.021977  | -12.792206 | 20.935092 |

|    |            |            |           |
|----|------------|------------|-----------|
| O  | 3.254657   | -11.975082 | 25.635549 |
| O  | 1.872418   | -9.564469  | 25.299195 |
| Ti | 1.460974   | -11.552470 | 25.086011 |
| O  | 1.504540   | -11.871945 | 23.296000 |
| O  | 2.168450   | -9.897069  | 21.414508 |
| Ti | 1.309773   | -12.085488 | 21.356405 |
| O  | -0.172837  | -13.278927 | 21.185029 |
| O  | 2.034993   | -7.438124  | 22.502376 |
| O  | 1.196644   | -7.183338  | 25.296817 |
| Ti | 6.034126   | -8.917688  | 25.049780 |
| O  | 6.791023   | -8.979003  | 23.224929 |
| O  | 8.591294   | -8.506514  | 21.173263 |
| Ti | 6.956334   | -9.626270  | 21.488445 |
| O  | 6.481318   | -11.450067 | 21.352145 |
| O  | 6.016255   | -10.819201 | 25.203021 |
| O  | 4.574087   | -8.620744  | 26.341121 |
| Ti | 3.169068   | -8.051898  | 25.288606 |
| O  | 4.383802   | -8.117089  | 23.769426 |
| O  | 5.428348   | -8.642140  | 20.689616 |
| Ti | 3.676090   | -8.568869  | 21.889731 |
| Ti | -14.055639 | -3.089994  | 22.510685 |
| O  | -14.963475 | -3.242220  | 24.200349 |
| O  | -15.501337 | -4.756434  | 26.643887 |
| Ti | -14.324652 | -3.424318  | 25.931842 |
| O  | -14.185080 | -1.662139  | 26.655629 |
| O  | -14.082023 | -1.098249  | 22.027721 |
| O  | -12.459551 | -4.111487  | 22.414097 |
| Ti | -10.816937 | -4.936187  | 22.792560 |
| O  | -10.390550 | -4.639144  | 24.650104 |
| O  | -12.606166 | -4.107180  | 26.409925 |
| Ti | -10.793535 | -4.658747  | 26.435334 |
| O  | -8.877659  | -5.711500  | 26.972495 |
| O  | -8.823593  | -5.884489  | 22.471399 |
| Ti | -12.667406 | -0.161357  | 23.029265 |
| O  | -13.045305 | 0.653239   | 24.714286 |
| Ti | -12.712894 | -0.905957  | 25.765572 |
| O  | -12.669959 | -1.941745  | 24.145945 |
| O  | -11.200522 | -0.861709  | 26.847623 |
| O  | -10.849498 | -0.224258  | 22.840516 |
| O  | -9.567661  | -3.270089  | 22.505435 |
| Ti | -9.256359  | -1.296858  | 22.928623 |
| O  | -9.262037  | -1.331140  | 24.842139 |
| O  | -9.599868  | -3.277252  | 27.192742 |
| Ti | -9.359899  | -1.402065  | 26.675829 |
| O  | -8.117588  | -0.176326  | 27.489147 |
| O  | -7.212230  | -2.382150  | 26.297546 |
| O  | -7.162022  | -2.305978  | 23.196337 |
| O  | -8.023782  | 0.403896   | 22.761869 |
| O  | -6.223095  | 0.180492   | 25.022949 |
| Ti | -6.411155  | -0.536709  | 23.271402 |
| Ti | -6.481694  | -0.673358  | 26.638337 |
| Ti | -7.674600  | -4.280268  | 26.382590 |

|    |            |            |           |
|----|------------|------------|-----------|
| O  | -7.404479  | -4.773758  | 24.599836 |
| Ti | -7.410542  | -4.329204  | 22.747412 |
| Ti | -15.743213 | -9.945326  | 22.059687 |
| Ti | -15.973540 | -9.231863  | 24.906618 |
| O  | -16.536708 | -8.185713  | 21.458908 |
| Ti | -15.264560 | -6.678410  | 22.065859 |
| O  | -15.488110 | -6.244156  | 23.961253 |
| O  | -16.769465 | -7.858304  | 25.889287 |
| Ti | -15.505682 | -6.413064  | 25.795395 |
| O  | -14.722048 | -8.611772  | 23.461865 |
| O  | -15.144790 | -4.720929  | 21.859101 |
| O  | -13.546069 | -7.217948  | 21.363159 |
| Ti | -12.539464 | -8.304244  | 22.802982 |
| O  | -16.920653 | -10.147144 | 23.618821 |
| O  | -12.226582 | -6.791303  | 24.146783 |
| O  | -13.987219 | -7.362155  | 26.468021 |
| Ti | -12.276818 | -7.664119  | 25.787801 |
| Ti | -13.597093 | -11.995301 | 22.426977 |
| O  | -15.392740 | -11.886470 | 21.959000 |
| O  | -12.662702 | -9.438797  | 24.667954 |
| O  | -11.997216 | -11.590317 | 26.566054 |
| O  | -13.687873 | -12.343949 | 24.259318 |
| Ti | -13.382707 | -11.013446 | 25.506238 |
| O  | -15.071393 | -10.411232 | 26.066598 |
| O  | -13.517617 | -10.024873 | 21.907048 |
| O  | -8.982863  | -12.568095 | 21.916881 |
| O  | -8.968312  | -11.584069 | 26.841394 |
| O  | -10.662313 | -9.000946  | 26.296258 |
| Ti | -10.364786 | -10.870326 | 25.801039 |
| O  | -10.242899 | -11.165866 | 24.004217 |
| O  | -10.800622 | -9.307302  | 22.496417 |
| Ti | -10.447339 | -11.329131 | 21.926015 |
| O  | -11.975254 | -12.604727 | 21.902028 |
| O  | -11.176859 | -6.866998  | 21.954165 |
| O  | -11.158295 | -6.588222  | 26.945195 |
| O  | -7.703434  | -8.288242  | 27.037700 |
| Ti | -9.238756  | -7.515590  | 26.319984 |
| O  | -9.180029  | -7.706225  | 24.450657 |
| O  | -7.744793  | -8.716654  | 21.802624 |
| Ti | -9.325702  | -7.891696  | 22.544696 |
| O  | -5.449790  | -3.961847  | 22.012742 |
| Ti | -3.912959  | -5.094626  | 22.882021 |
| O  | -4.716327  | -5.036478  | 24.635876 |
| O  | -6.146227  | -4.660675  | 27.424778 |
| Ti | -4.609248  | -5.164739  | 26.497984 |
| O  | -4.758666  | -0.971101  | 27.281867 |
| O  | -4.588298  | -0.204872  | 22.662921 |
| O  | -2.856669  | -3.389453  | 22.335036 |
| Ti | -2.932797  | -1.356939  | 22.591528 |
| O  | -3.262130  | -1.506476  | 24.527031 |
| O  | -3.436189  | -3.517798  | 26.816832 |
| Ti | -3.191225  | -1.594836  | 26.376273 |

|    |           |            |           |
|----|-----------|------------|-----------|
| O  | -1.911677 | -0.267148  | 27.095735 |
| O  | -1.501062 | 0.074599   | 22.453783 |
| Ti | -5.853636 | -8.684791  | 22.561718 |
| O  | -6.177120 | -7.994977  | 24.293582 |
| Ti | -6.084702 | -8.525913  | 26.074957 |
| Ti | -7.470708 | -12.385567 | 22.932534 |
| O  | -6.542779 | -10.428163 | 25.726247 |
| O  | -7.707333 | -13.095707 | 24.680848 |
| Ti | -7.284210 | -12.111767 | 26.168912 |
| O  | -6.606158 | -10.636094 | 22.819022 |
| O  | -4.550113 | -6.996621  | 22.396691 |
| O  | -4.916206 | -7.123599  | 26.835174 |
| O  | 1.232729  | 0.368947   | 1.684495  |
| O  | 1.599198  | 0.496205   | -2.755506 |
| O  | 3.289578  | 4.008748   | 1.261657  |
| O  | 3.227317  | 3.800704   | -1.646291 |
| O  | 4.390229  | 6.467823   | -0.600255 |
| Ti | 3.966824  | 5.483871   | -2.087046 |
| Ti | 4.153783  | 5.758052   | 1.148419  |
| Ti | 2.536602  | 2.057213   | 1.519569  |
| O  | 2.858942  | 1.366690   | -0.212640 |
| Ti | 2.767003  | 1.897559   | -1.994000 |
| O  | -1.815704 | -6.701318  | 1.626036  |
| O  | 1.442242  | -5.658687  | -3.199833 |
| O  | 1.273993  | -6.421003  | 1.418347  |
| O  | -0.459854 | -3.238762  | 1.746112  |
| Ti | -0.382687 | -5.271046  | 1.490512  |
| O  | -0.054857 | -5.122235  | -0.445826 |
| O  | 0.120652  | -3.110526  | -2.734681 |
| Ti | -0.124888 | -5.033434  | -2.294969 |
| O  | -1.405697 | -6.359717  | -3.015811 |
| O  | 2.133660  | -2.664135  | 2.068682  |
| Ti | 0.596289  | -1.533239  | 1.199146  |
| O  | 1.402030  | -1.591202  | -0.555511 |
| O  | 2.830990  | -1.966122  | -3.344091 |
| Ti | 1.293390  | -1.462802  | -2.417884 |
| O  | 4.386649  | 1.659583   | -2.955900 |
| Ti | 5.921498  | 0.886544   | -2.238283 |
| O  | 5.862849  | 1.078660   | -0.368870 |
| O  | 4.428400  | 2.090521   | 2.277305  |
| Ti | 6.009657  | 1.265454   | 1.536833  |
| O  | 7.860340  | 0.242232   | 2.131072  |
| O  | 7.841589  | -0.039719  | -2.862987 |
| O  | 5.666106  | 5.941845   | 2.163839  |
| O  | 5.651262  | 4.955694   | -2.759948 |
| O  | 7.345003  | 2.372312   | -2.212746 |
| Ti | 7.047483  | 4.241715   | -1.719219 |
| O  | 6.925692  | 4.538457   | 0.077262  |
| O  | 7.484578  | 2.680914   | 1.585924  |
| Ti | 7.130284  | 4.702797   | 2.155909  |
| O  | 8.658413  | 5.978989   | 2.178883  |
| O  | 10.200984 | 3.398872   | 2.175780  |

|    |           |           |           |
|----|-----------|-----------|-----------|
| O  | 9.346182  | 2.809441  | -0.584438 |
| O  | 8.680449  | 4.960055  | -2.484786 |
| O  | 10.370855 | 5.715568  | -0.178363 |
| Ti | 10.066147 | 4.383581  | -1.424875 |
| O  | 11.753937 | 3.780997  | -1.983554 |
| Ti | 10.280123 | 5.368886  | 1.654058  |
| O  | 12.075578 | 5.261305  | 2.122379  |
| Ti | 12.426523 | 3.319769  | 2.023146  |
| Ti | 12.656920 | 2.603468  | -0.823951 |
| O  | 13.220993 | 1.562049  | 2.625863  |
| Ti | 11.950436 | 0.054169  | 2.018887  |
| O  | 12.172551 | -0.382209 | 0.124615  |
| O  | 13.453259 | 1.229927  | -1.805364 |
| Ti | 12.189841 | -0.216081 | -1.710535 |
| O  | 11.405713 | 1.984739  | 0.622224  |
| O  | 11.834612 | -1.903738 | 2.227129  |
| O  | 10.230772 | 0.591238  | 2.720084  |
| Ti | 9.223177  | 1.677118  | 1.280424  |
| O  | 13.603519 | 3.520604  | 0.463478  |
| O  | 8.906421  | 0.162109  | -0.061257 |
| O  | 10.670119 | 0.732093  | -2.381047 |
| Ti | 8.958979  | 1.034275  | -1.702924 |
| Ti | 4.358474  | -2.348167 | -2.301689 |
| O  | 4.088938  | -1.853019 | -0.519219 |
| Ti | 4.094199  | -2.295719 | 1.333944  |
| Ti | 3.165731  | -5.955027 | -2.556925 |
| O  | 3.846609  | -4.318789 | 0.885419  |
| O  | 4.709510  | -7.028808 | 1.319552  |
| O  | 2.907620  | -6.807464 | -0.941437 |
| Ti | 3.096751  | -6.088589 | 0.810086  |
| O  | 3.895281  | -4.245851 | -2.217042 |
| Ti | 9.353701  | -6.460174 | 1.052414  |
| O  | 9.731015  | -7.279644 | -0.630590 |
| Ti | 9.398283  | -5.722647 | -1.684913 |
| O  | 9.356268  | -4.683295 | -0.068129 |
| O  | 7.885190  | -5.767738 | -2.765562 |
| O  | 7.535627  | -6.396852 | 1.241249  |
| O  | 6.254253  | -3.354485 | 1.575491  |
| Ti | 5.941493  | -5.326412 | 1.153050  |
| O  | 5.944907  | -5.296663 | -0.761241 |
| O  | 6.283882  | -3.351790 | -3.110832 |
| Ti | 6.044415  | -5.226799 | -2.594330 |
| O  | 4.801970  | -6.452388 | -3.407386 |
| O  | 5.562229  | -0.917065 | -2.892316 |
| O  | 5.508325  | -0.741659 | 1.610149  |
| Ti | 10.743716 | -3.532284 | 1.574355  |
| O  | 11.649305 | -3.384478 | -0.116062 |
| O  | 12.183811 | -1.872739 | -2.558469 |
| Ti | 11.007316 | -3.204995 | -1.847894 |
| O  | 10.870647 | -4.966239 | -2.574471 |
| O  | 10.767481 | -5.523685 | 2.054829  |
| O  | 9.147165  | -2.512194 | 1.668065  |



|    |            |           |           |
|----|------------|-----------|-----------|
| Ti | 7.503311   | -1.687967 | 1.288757  |
| O  | 7.075012   | -1.988176 | -0.568421 |
| O  | 9.289710   | -2.521224 | -2.328234 |
| Ti | 7.477292   | -1.970295 | -2.353435 |
| Ti | -9.351046  | 2.291536  | -0.966431 |
| O  | -10.109288 | 2.352307  | 0.857840  |
| O  | -11.907843 | 1.879490  | 2.911267  |
| Ti | -10.272807 | 2.998723  | 2.594566  |
| O  | -9.798014  | 4.822478  | 2.730340  |
| O  | -9.332900  | 4.193334  | -1.119175 |
| O  | -7.891067  | 1.995103  | -2.258676 |
| Ti | -6.486742  | 1.424518  | -1.205541 |
| O  | -7.700332  | 1.490172  | 0.313263  |
| O  | -8.745324  | 2.013551  | 3.392681  |
| Ti | -6.993490  | 1.940952  | 2.192732  |
| O  | -5.352433  | 0.810538  | 1.579043  |
| O  | -4.514486  | 0.556757  | -1.216490 |
| Ti | -7.885082  | 5.026937  | -0.306321 |
| O  | -8.244485  | 6.367197  | 0.940474  |
| Ti | -7.944257  | 5.328850  | 2.546836  |
| O  | -7.436406  | 3.806900  | 1.238987  |
| O  | -6.337663  | 6.164167  | 3.148542  |
| O  | -6.571780  | 5.348639  | -1.553622 |
| O  | -5.189732  | 2.937126  | -1.217427 |
| Ti | -4.778309  | 4.925931  | -1.004029 |
| O  | -4.822962  | 5.243829  | 0.786511  |
| O  | -5.485288  | 3.268865  | 2.667902  |
| Ti | -4.625804  | 5.457385  | 2.726138  |
| O  | -3.143626  | 6.651382  | 2.897640  |
| O  | -3.014601  | 3.906493  | 2.389990  |
| O  | -2.797818  | 3.922625  | -1.042543 |
| O  | -3.681067  | 6.290421  | -1.845776 |
| O  | -1.633879  | 6.020401  | 0.465735  |
| Ti | -1.997018  | 5.668464  | -1.298682 |
| Ti | -1.732430  | 5.541432  | 2.325362  |
| Ti | -3.879049  | 1.940241  | 2.375601  |
| O  | -2.638792  | 1.724127  | 0.776504  |
| Ti | -3.214502  | 2.023519  | -1.064946 |
| Ti | -11.848176 | -3.614395 | -0.651168 |
| Ti | -12.641863 | -3.738384 | 2.130861  |
| O  | -12.004335 | -1.969174 | -1.475102 |
| Ti | -11.236848 | -0.290147 | -0.898987 |
| O  | -12.407492 | 0.135270  | 0.499082  |
| O  | -12.757383 | -1.862567 | 2.497769  |
| Ti | -11.883498 | -0.021811 | 2.294383  |
| O  | -10.847036 | -3.670952 | 0.999825  |
| O  | -10.777315 | 1.271421  | -1.782303 |
| O  | -9.498463  | -0.965764 | -0.610101 |
| Ti | -7.777543  | -1.743342 | -0.729141 |
| O  | -13.402346 | -4.022890 | 0.426289  |
| O  | -7.024474  | -1.554772 | 0.953775  |
| O  | -10.132026 | -0.700490 | 2.261825  |

|    |            |           |           |
|----|------------|-----------|-----------|
| Ti | -8.529521  | -1.733002 | 2.512757  |
| Ti | -9.236325  | -5.217224 | -1.006108 |
| O  | -10.987447 | -4.871180 | -1.741586 |
| O  | -9.547351  | -3.417318 | 3.055092  |
| O  | -7.734238  | -5.368157 | 2.447790  |
| O  | -9.619919  | -6.219716 | 0.510784  |
| Ti | -9.668721  | -5.240102 | 2.148414  |
| O  | -11.705975 | -5.266913 | 2.886879  |
| O  | -8.607977  | -3.518995 | -0.599006 |
| O  | -4.800592  | -5.384045 | -2.737130 |
| O  | -4.761078  | -6.367487 | 2.337859  |
| O  | -6.811304  | -2.863255 | 2.885069  |
| Ti | -5.900357  | -4.653530 | 2.398467  |
| O  | -5.510139  | -4.938534 | 0.374335  |
| O  | -6.095086  | -2.940845 | -1.516447 |
| Ti | -6.041596  | -4.852456 | -1.440731 |
| O  | -7.648841  | -5.816038 | -1.816711 |
| O  | -6.683777  | -0.521580 | -1.789872 |
| O  | -7.333295  | -0.102150 | 2.915395  |
| O  | -4.274543  | -3.144101 | 2.516461  |
| Ti | -5.372367  | -1.202413 | 2.393217  |
| O  | -4.181368  | -1.543776 | 0.617760  |
| O  | -3.441832  | -1.796575 | -2.416733 |
| Ti | -4.774338  | -1.397108 | -1.225602 |
| O  | -2.083183  | 1.719410  | -2.534317 |
| Ti | -0.288095  | 1.288483  | -2.103446 |
| O  | -0.313449  | 1.382979  | -0.268259 |
| O  | -2.035764  | 1.784037  | 3.351765  |
| Ti | -0.655613  | 1.482136  | 1.699563  |
| O  | 0.052192   | 6.121038  | 2.680914  |
| O  | -0.551223  | 5.512353  | -2.432873 |
| O  | 0.860916   | 2.912362  | -2.422918 |
| Ti | 1.116174   | 4.779525  | -1.814624 |
| O  | 1.054380   | 4.875102  | 0.013089  |
| O  | 0.677769   | 3.036909  | 1.961234  |
| Ti | 1.474226   | 5.197335  | 1.952699  |
| O  | 2.718400   | 6.670926  | 1.851323  |
| O  | 2.313558   | 6.047296  | -2.722268 |
| Ti | -1.616343  | -2.165632 | -1.932800 |
| O  | -1.289684  | -1.851324 | -0.140011 |
| Ti | -2.496093  | -2.397742 | 1.526939  |
| Ti | -2.994077  | -5.788633 | -2.249536 |
| O  | -2.742164  | -4.240557 | 0.743292  |
| O  | -3.420297  | -6.843255 | -0.761659 |
| Ti | -3.483504  | -5.963371 | 0.911645  |
| O  | -2.251788  | -4.076567 | -2.013549 |
| O  | -0.664598  | -0.618374 | -2.702894 |
| O  | -1.314869  | -0.540448 | 1.856648  |
| O  | 0.122777   | -1.207095 | 7.699639  |
| O  | 0.309639   | -1.530799 | 3.656262  |
| O  | 1.815555   | 1.816014  | 7.619725  |
| O  | 2.467122   | 1.806521  | 3.803815  |

|    |           |           |          |
|----|-----------|-----------|----------|
| O  | 4.185244  | 2.878169  | 5.926676 |
| Ti | 3.893536  | 3.264960  | 4.113955 |
| Ti | 3.822613  | 2.667188  | 7.852693 |
| Ti | 2.038319  | -0.080451 | 7.658059 |
| O  | 1.939161  | -0.551861 | 5.799125 |
| Ti | 1.791212  | -0.152294 | 3.979718 |
| O  | -2.614285 | -7.821809 | 8.017788 |
| O  | -0.067111 | -7.959344 | 3.401139 |
| O  | 0.271273  | -8.119128 | 7.618653 |
| O  | -1.803513 | -4.838707 | 7.935530 |
| Ti | -1.211322 | -6.717686 | 7.361783 |
| O  | -1.224609 | -6.614470 | 5.563255 |
| O  | -1.686152 | -4.910058 | 3.372016 |
| Ti | -1.753585 | -7.148595 | 3.717914 |
| O  | -3.089946 | -8.529393 | 3.509666 |
| O  | 1.116198  | -3.669374 | 8.398009 |
| Ti | -0.839541 | -3.063211 | 7.416478 |
| O  | 0.082657  | -3.485729 | 5.800909 |
| O  | 0.895780  | -4.816841 | 3.305268 |
| Ti | -0.376007 | -3.401574 | 4.002331 |
| O  | 3.359800  | -0.695764 | 2.895859 |
| Ti | 5.161672  | -0.786218 | 3.825090 |
| O  | 4.679500  | -0.668865 | 5.584576 |
| O  | 4.077596  | 0.568886  | 7.765258 |
| Ti | 5.674720  | -0.517912 | 7.232345 |
| O  | 7.451519  | -1.736840 | 7.909619 |
| O  | 7.085366  | -1.695031 | 3.563357 |
| O  | 5.558444  | 3.166228  | 8.860423 |
| O  | 5.684841  | 3.904041  | 3.636807 |
| O  | 6.085300  | 1.058669  | 3.877521 |
| Ti | 6.954319  | 2.688674  | 4.665135 |
| O  | 7.004308  | 3.154949  | 6.449356 |
| O  | 6.828695  | 0.996746  | 8.138396 |
| Ti | 7.453530  | 3.100873  | 8.350409 |
| O  | 8.695139  | 4.576149  | 8.529156 |
| O  | 9.336807  | 2.040214  | 7.596687 |
| O  | 8.749074  | 1.636625  | 4.629244 |
| O  | 8.288913  | 3.958724  | 3.770424 |
| O  | 10.130245 | 4.517630  | 5.771128 |
| Ti | 10.054698 | 3.171340  | 4.411699 |
| O  | 12.081016 | 3.287012  | 4.037185 |
| Ti | 10.106935 | 3.896239  | 7.509503 |
| O  | 11.788218 | 3.349801  | 8.052598 |
| Ti | 11.787508 | 1.465885  | 7.525826 |
| Ti | 12.707574 | 1.464039  | 4.721053 |
| O  | 12.999195 | -0.086442 | 8.267109 |
| Ti | 11.971902 | -1.752149 | 7.558218 |
| O  | 12.656805 | -2.273898 | 5.960406 |
| O  | 12.638346 | -0.354652 | 4.088372 |
| Ti | 11.595695 | -2.093985 | 4.318085 |
| O  | 10.936153 | 1.609452  | 5.649354 |
| O  | 10.986788 | -3.389587 | 8.005628 |

|    |            |           |          |
|----|------------|-----------|----------|
| O  | 10.523536  | -0.482399 | 7.345351 |
| Ti | 8.646156   | 0.089473  | 7.520389 |
| O  | 13.454922  | 1.573235  | 6.371368 |
| O  | 7.478995   | -0.261172 | 5.939029 |
| O  | 9.880556   | -1.449925 | 4.742763 |
| Ti | 8.496481   | -0.289769 | 4.124112 |
| Ti | 2.783997   | -3.852424 | 3.654952 |
| O  | 2.814458   | -3.473142 | 5.530111 |
| Ti | 3.076175   | -3.554182 | 7.389802 |
| Ti | 1.590699   | -7.065021 | 3.488295 |
| O  | 2.757420   | -5.607868 | 7.519472 |
| O  | 3.552199   | -8.471607 | 7.286861 |
| O  | 1.525628   | -6.691792 | 5.388747 |
| Ti | 1.970562   | -7.387729 | 7.013026 |
| O  | 3.249790   | -5.643207 | 3.078008 |
| Ti | 8.445628   | -7.954967 | 7.032735 |
| O  | 8.645231   | -9.205024 | 5.614958 |
| Ti | 8.116156   | -7.988038 | 4.217416 |
| O  | 8.586583   | -6.552326 | 5.471936 |
| O  | 6.405271   | -8.292602 | 3.668132 |
| O  | 6.617844   | -7.576778 | 7.120451 |
| O  | 5.277929   | -5.009683 | 7.784383 |
| Ti | 4.870956   | -6.851748 | 7.090255 |
| O  | 4.566082   | -6.633982 | 5.311246 |
| O  | 5.862348   | -5.492335 | 3.251369 |
| Ti | 4.723593   | -7.273097 | 3.445135 |
| O  | 3.062540   | -8.276433 | 3.381896 |
| O  | 4.563638   | -2.861463 | 3.441130 |
| O  | 4.790510   | -2.375527 | 7.680746 |
| Ti | 10.097749  | -5.093114 | 7.425644 |
| O  | 10.849704  | -5.398341 | 5.768045 |
| O  | 11.201900  | -3.866527 | 3.733691 |
| Ti | 9.925002   | -5.444990 | 4.043101 |
| O  | 9.416350   | -7.371935 | 2.984015 |
| O  | 9.951539   | -7.042953 | 7.971839 |
| O  | 8.324441   | -4.483291 | 7.616529 |
| Ti | 6.654380   | -3.593419 | 7.398684 |
| O  | 6.300036   | -3.424854 | 5.597924 |
| O  | 8.400801   | -4.428707 | 3.722239 |
| Ti | 6.580911   | -3.767459 | 3.747104 |
| Ti | -11.660314 | 1.460493  | 5.005399 |
| O  | -12.281393 | 2.030217  | 6.669335 |
| O  | -12.941767 | 0.263901  | 8.565044 |
| Ti | -11.488578 | 1.686822  | 8.359117 |
| O  | -10.421066 | 3.240974  | 9.092573 |
| O  | -10.750604 | 3.260771  | 4.751809 |
| O  | -10.196570 | 0.329995  | 5.136036 |
| Ti | -8.232362  | 0.424070  | 4.811202 |
| O  | -6.818952  | 0.068106  | 6.299212 |
| O  | -9.965833  | 0.642733  | 8.341928 |
| Ti | -7.996487  | 0.440921  | 8.029148 |
| O  | -6.378981  | -0.921923 | 8.385139 |

|    |            |           |          |
|----|------------|-----------|----------|
| O  | -5.404459  | -1.473577 | 4.528228 |
| Ti | -9.024599  | 3.500598  | 5.595729 |
| O  | -9.192376  | 4.575609  | 7.065243 |
| Ti | -8.487179  | 3.895865  | 8.747101 |
| O  | -8.564734  | 1.836930  | 6.434940 |
| O  | -7.020067  | 5.024812  | 8.912438 |
| O  | -7.637667  | 4.324038  | 4.453854 |
| O  | -6.491681  | 1.637664  | 4.390965 |
| Ti | -5.793683  | 3.533787  | 4.943479 |
| O  | -5.905544  | 3.518150  | 6.737520 |
| O  | -7.311932  | 2.231600  | 8.731604 |
| Ti | -5.422131  | 3.903037  | 8.645879 |
| O  | -3.752619  | 4.767673  | 8.596971 |
| O  | -4.546571  | 2.033856  | 8.583484 |
| O  | -4.129355  | 2.050936  | 4.672183 |
| O  | -4.222484  | 4.734560  | 4.669967 |
| O  | -2.311249  | 3.289993  | 6.455157 |
| Ti | -2.612966  | 3.466786  | 4.683062 |
| Ti | -2.154001  | 3.718381  | 8.356719 |
| Ti | -4.673798  | 0.074231  | 8.652451 |
| O  | -3.820031  | 0.086320  | 6.849251 |
| Ti | -4.984134  | 0.304554  | 5.303552 |
| Ti | -14.151096 | -5.035577 | 5.225457 |
| Ti | -14.426636 | -5.162781 | 8.117791 |
| O  | -13.959784 | -3.612109 | 3.940119 |
| Ti | -13.076800 | -1.851302 | 4.675918 |
| O  | -14.060464 | -1.574180 | 6.240394 |
| O  | -14.414293 | -3.225238 | 8.430290 |
| Ti | -13.308903 | -1.574321 | 8.002035 |
| O  | -12.944211 | -4.794403 | 6.709344 |
| O  | -12.898622 | 0.035777  | 4.228698 |
| O  | -11.404366 | -2.544285 | 5.047154 |
| Ti | -9.662887  | -3.356765 | 5.142049 |
| O  | -15.491198 | -5.421835 | 6.554761 |
| O  | -8.452591  | -2.945349 | 6.762318 |
| O  | -11.553636 | -2.204752 | 7.839994 |
| Ti | -9.963696  | -3.132001 | 8.352417 |
| Ti | -11.411582 | -6.431893 | 4.571890 |
| O  | -13.444118 | -6.416237 | 4.321917 |
| O  | -11.144001 | -4.738736 | 8.744386 |
| O  | -10.120732 | -7.274939 | 8.276079 |
| O  | -11.701196 | -7.570582 | 5.998998 |
| Ti | -11.494450 | -6.282437 | 7.449713 |
| O  | -13.214577 | -6.624117 | 8.672879 |
| O  | -10.659504 | -5.023881 | 5.795549 |
| O  | -6.566636  | -7.561828 | 4.007996 |
| O  | -6.370348  | -7.487501 | 8.128905 |
| O  | -8.335123  | -4.534938 | 8.569430 |
| Ti | -8.138293  | -6.610679 | 8.367705 |
| O  | -8.214299  | -6.678816 | 6.410544 |
| O  | -7.957891  | -4.534338 | 4.920008 |
| Ti | -7.939517  | -6.488653 | 4.574743 |

|    |           |           |           |
|----|-----------|-----------|-----------|
| O  | -9.731648 | -6.804662 | 3.616532  |
| O  | -8.412646 | -1.639144 | 4.698976  |
| O  | -8.800954 | -1.503979 | 8.732623  |
| O  | -5.580660 | -4.151659 | 9.093713  |
| Ti | -6.955049 | -2.895914 | 8.339664  |
| O  | -5.551227 | -2.977030 | 6.824659  |
| O  | -5.392421 | -4.411268 | 4.442977  |
| Ti | -6.653237 | -2.960669 | 5.178733  |
| O  | -3.769497 | -0.093520 | 3.367881  |
| Ti | -1.656354 | -0.274687 | 3.963260  |
| O  | -1.540457 | -0.345780 | 5.801966  |
| O  | -2.902107 | 0.374881  | 9.686377  |
| Ti | -1.708973 | -0.081145 | 7.718307  |
| O  | -0.572777 | 4.722308  | 8.404517  |
| O  | -0.943408 | 4.185727  | 3.879231  |
| O  | 0.066543  | 1.111143  | 3.905049  |
| Ti | 0.688092  | 3.088993  | 4.305337  |
| O  | 0.734373  | 3.401396  | 6.076250  |
| O  | -1.167679 | 1.735875  | 8.152939  |
| Ti | 0.984312  | 3.645268  | 8.063005  |
| O  | 2.782055  | 4.239918  | 8.242552  |
| O  | 2.296972  | 4.364141  | 3.759246  |
| Ti | -3.388399 | -4.054900 | 4.387137  |
| O  | -2.692849 | -3.431010 | 6.065544  |
| Ti | -3.876493 | -3.866116 | 7.812766  |
| Ti | -4.608285 | -7.622669 | 4.158714  |
| O  | -4.294912 | -5.703864 | 7.372364  |
| O  | -4.731966 | -8.491985 | 5.863936  |
| Ti | -4.560671 | -7.583577 | 7.456393  |
| O  | -3.524546 | -6.057258 | 4.598674  |
| O  | -2.226916 | -2.336531 | 3.676380  |
| O  | -2.623100 | -1.986612 | 8.055449  |
| O  | 0.015127  | -2.787067 | 14.113164 |
| O  | -0.878316 | -3.137600 | 9.714071  |
| O  | 1.959562  | 0.336646  | 12.404741 |
| O  | 1.335042  | 0.207296  | 9.737249  |
| O  | 2.889362  | 2.771687  | 12.429580 |
| Ti | 2.213865  | 1.717205  | 10.962581 |
| Ti | 2.924500  | 1.532020  | 13.861711 |
| Ti | 1.580797  | -1.481154 | 13.304710 |
| O  | 1.146268  | -2.326822 | 11.606893 |
| Ti | 0.809251  | -1.879229 | 9.832728  |
| O  | -4.170915 | -9.405094 | 14.121457 |
| O  | -1.291511 | -9.333184 | 9.735210  |
| O  | -1.128290 | -9.519290 | 13.821275 |
| O  | -2.417094 | -5.994732 | 14.177572 |
| Ti | -2.633875 | -8.021574 | 13.872275 |
| O  | -2.854835 | -8.241799 | 12.003340 |
| O  | -3.157562 | -6.333684 | 10.252314 |
| Ti | -2.862172 | -8.365891 | 10.092817 |
| O  | -4.592930 | -8.844821 | 9.322489  |
| O  | 1.273344  | -5.006189 | 14.125144 |

|    |           |           |           |
|----|-----------|-----------|-----------|
| Ti | -0.702043 | -4.763420 | 13.781074 |
| O  | -1.022368 | -4.950244 | 11.927725 |
| O  | -0.147223 | -6.128935 | 9.202821  |
| Ti | -1.609310 | -5.055769 | 10.160008 |
| O  | 2.685372  | -1.789630 | 8.760123  |
| Ti | 4.389085  | -2.259657 | 9.897025  |
| O  | 3.683103  | -1.973723 | 11.610262 |
| O  | 3.541165  | -0.571619 | 13.941639 |
| Ti | 4.844514  | -2.044475 | 13.186256 |
| O  | 6.538509  | -3.478944 | 13.598206 |
| O  | 6.251930  | -3.442472 | 9.682143  |
| O  | 4.819577  | 1.924331  | 14.439007 |
| O  | 3.869652  | 1.679043  | 10.006946 |
| O  | 5.652014  | -0.647680 | 9.685877  |
| Ti | 5.826131  | 1.371328  | 10.054620 |
| O  | 6.187012  | 1.504747  | 11.914406 |
| O  | 6.131150  | -0.519057 | 13.801440 |
| Ti | 6.550460  | 1.503916  | 13.770253 |
| O  | 8.177215  | 2.403260  | 14.313750 |
| O  | 8.665677  | 0.038417  | 12.687677 |
| O  | 8.767227  | -0.322909 | 9.607439  |
| O  | 7.917843  | 2.125782  | 10.128371 |
| O  | 10.061923 | 2.359039  | 12.190604 |
| Ti | 9.493185  | 1.171288  | 10.824897 |
| O  | 11.166721 | 1.267124  | 9.609748  |
| Ti | 9.660264  | 1.415290  | 13.798656 |
| O  | 11.683482 | 1.160910  | 14.056118 |
| Ti | 12.227136 | -0.194124 | 13.007255 |
| Ti | 12.406106 | -0.167250 | 10.168545 |
| O  | 12.222184 | -1.719325 | 14.163432 |
| Ti | 11.148916 | -3.462664 | 13.505898 |
| O  | 11.855877 | -3.698505 | 11.813172 |
| O  | 12.232039 | -2.048486 | 9.700031  |
| Ti | 10.846782 | -3.456328 | 10.181752 |
| O  | 10.919072 | -0.425805 | 11.613440 |
| O  | 10.826326 | -5.321794 | 13.989871 |
| O  | 9.506198  | -2.649585 | 13.311255 |
| Ti | 7.833349  | -1.708837 | 13.282842 |
| O  | 13.553239 | 0.082263  | 11.666123 |
| O  | 6.488328  | -1.890073 | 11.723600 |
| O  | 9.120518  | -2.826793 | 10.531482 |
| Ti | 7.550860  | -1.849240 | 10.031759 |
| Ti | 1.762645  | -5.322887 | 9.494298  |
| O  | 1.931321  | -5.165193 | 11.340099 |
| Ti | 2.909669  | -5.445906 | 12.928585 |
| Ti | 0.526184  | -8.715686 | 9.660495  |
| O  | 2.132065  | -7.293975 | 13.437982 |
| O  | 2.099268  | -9.967632 | 13.380626 |
| O  | 0.354452  | -8.177554 | 11.501699 |
| Ti | 0.553955  | -8.670186 | 13.273980 |
| O  | 2.142364  | -7.298711 | 9.271809  |
| Ti | 7.053569  | -9.163971 | 12.965284 |

|    |            |            |           |
|----|------------|------------|-----------|
| O  | 7.424122   | -9.843258  | 11.326588 |
| Ti | 6.539072   | -8.489890  | 10.172072 |
| O  | 6.389068   | -7.516780  | 12.173479 |
| O  | 5.324584   | -9.746671  | 9.422443  |
| O  | 5.249997   | -10.021126 | 13.301146 |
| O  | 4.508073   | -6.885042  | 13.789525 |
| Ti | 3.711995   | -8.732505  | 13.089719 |
| O  | 3.678372   | -8.447437  | 11.289457 |
| O  | 4.946668   | -7.165877  | 9.345858  |
| Ti | 3.580295   | -8.955871  | 9.380387  |
| O  | 1.937892   | -9.976122  | 9.440607  |
| O  | 3.615695   | -4.177609  | 9.520880  |
| O  | 3.940860   | -3.835372  | 13.616812 |
| Ti | 9.491840   | -6.676281  | 13.362314 |
| O  | 9.923373   | -7.171460  | 11.573466 |
| O  | 10.425289  | -5.269947  | 9.652145  |
| Ti | 9.141027   | -6.756082  | 9.927962  |
| O  | 8.193583   | -8.407338  | 9.079232  |
| O  | 8.819827   | -8.528787  | 13.719911 |
| O  | 7.968183   | -5.640757  | 13.225869 |
| Ti | 6.030709   | -5.576736  | 13.311657 |
| O  | 4.799693   | -5.201179  | 11.738310 |
| O  | 7.332110   | -6.123476  | 10.122206 |
| Ti | 5.466730   | -5.350501  | 9.930583  |
| Ti | -12.809536 | 0.052611   | 10.721836 |
| O  | -13.242139 | 0.548196   | 12.509875 |
| O  | -13.742002 | -1.353372  | 14.432249 |
| Ti | -12.457793 | 0.132646   | 14.154717 |
| O  | -11.510261 | 1.784316   | 15.002171 |
| O  | -12.135162 | 1.903921   | 10.364434 |
| O  | -11.287450 | -0.985520  | 10.858891 |
| Ti | -9.350673  | -1.048960  | 10.770087 |
| O  | -8.117340  | -1.428738  | 12.341392 |
| O  | -10.648941 | -0.500239  | 13.959856 |
| Ti | -8.784149  | -1.275510  | 14.149528 |
| O  | -6.933539  | -2.448769  | 14.561715 |
| O  | -7.252107  | -2.797431  | 10.464568 |
| Ti | -10.368278 | 2.537898   | 11.118121 |
| O  | -10.737465 | 3.218809   | 12.756309 |
| Ti | -9.854332  | 1.864788   | 13.911275 |
| O  | -9.705760  | 0.890805   | 11.909605 |
| O  | -8.638431  | 3.121332   | 14.660368 |
| O  | -8.564149  | 3.394471   | 10.782172 |
| O  | -7.823692  | 0.256532   | 10.293308 |
| Ti | -7.027337  | 2.104022   | 10.992559 |
| O  | -6.992965  | 1.819286   | 12.792234 |
| O  | -8.262240  | 0.539830   | 14.734607 |
| Ti | -6.894996  | 2.329251   | 14.700854 |
| O  | -5.252377  | 3.349928   | 14.639543 |
| O  | -5.456207  | 0.672123   | 14.808798 |
| O  | -5.448398  | 0.664140   | 10.643614 |
| O  | -5.414391  | 3.338912   | 10.701017 |



|    |            |           |           |
|----|------------|-----------|-----------|
| O  | -3.667892  | 1.549783  | 12.579083 |
| Ti | -3.869661  | 2.040376  | 10.806710 |
| Ti | -3.841045  | 2.089419  | 14.419861 |
| Ti | -5.079583  | -1.302959 | 14.586557 |
| O  | -5.250025  | -1.461977 | 12.741035 |
| Ti | -6.227309  | -1.183316 | 11.151573 |
| Ti | -15.544243 | -6.429596 | 11.078136 |
| Ti | -15.723265 | -6.455441 | 13.916581 |
| O  | -15.538208 | -4.904823 | 9.921263  |
| Ti | -14.464594 | -3.161421 | 10.578785 |
| O  | -15.172100 | -2.925161 | 12.271076 |
| O  | -15.548353 | -4.574450 | 14.385548 |
| Ti | -14.163063 | -3.167181 | 13.903115 |
| O  | -14.235878 | -6.197367 | 12.471767 |
| O  | -14.144052 | -1.302115 | 10.093844 |
| O  | -12.822225 | -3.974661 | 10.774031 |
| Ti | -11.150369 | -4.917643 | 10.799950 |
| O  | -16.870732 | -6.705120 | 12.418907 |
| O  | -9.804409  | -4.736790 | 12.359984 |
| O  | -12.437424 | -3.796927 | 13.553925 |
| Ti | -10.868222 | -4.776217 | 14.051422 |
| Ti | -12.977647 | -8.040391 | 10.286698 |
| O  | -15.001090 | -7.785387 | 10.029187 |
| O  | -12.084027 | -6.302273 | 14.476981 |
| O  | -11.233760 | -8.749880 | 13.954838 |
| O  | -13.379350 | -8.983916 | 11.894177 |
| Ti | -12.810650 | -7.796074 | 13.259956 |
| O  | -14.484714 | -7.890995 | 14.474570 |
| O  | -11.983530 | -6.663323 | 11.396857 |
| O  | -8.135877  | -8.550397 | 9.642185  |
| O  | -7.186128  | -8.305530 | 14.074019 |
| O  | -8.968731  | -5.978461 | 14.397688 |
| Ti | -9.142407  | -7.997577 | 14.028337 |
| O  | -9.502461  | -8.132513 | 12.168319 |
| O  | -9.448816  | -6.108460 | 10.281678 |
| Ti | -9.866558  | -8.131053 | 10.312998 |
| O  | -11.494386 | -9.028605 | 9.771606  |
| O  | -9.854065  | -3.148030 | 10.484445 |
| O  | -9.568491  | -3.183403 | 14.400155 |
| O  | -6.001097  | -4.836526 | 15.321401 |
| Ti | -7.706408  | -4.366674 | 14.185956 |
| O  | -7.000979  | -4.655182 | 12.473146 |
| O  | -6.857504  | -6.056332 | 10.141275 |
| Ti | -8.161578  | -4.583731 | 10.896991 |
| O  | -4.589378  | -1.622674 | 9.955828  |
| Ti | -2.614485  | -1.865092 | 10.299522 |
| O  | -2.294562  | -1.676666 | 12.152771 |
| O  | -3.168805  | -0.500464 | 14.878899 |
| Ti | -1.706356  | -1.571833 | 13.920225 |
| O  | -2.023554  | 2.706254  | 14.345255 |
| O  | -2.187207  | 2.890267  | 10.258964 |
| O  | -0.900232  | -0.632952 | 9.904439  |

|    |           |            |           |
|----|-----------|------------|-----------|
| Ti | -0.680949 | 1.393491   | 10.207713 |
| O  | -0.455694 | 1.616094   | 12.076229 |
| O  | -0.158362 | -0.293783  | 13.826963 |
| Ti | -0.453419 | 1.738411   | 13.987031 |
| O  | 1.276290  | 2.217196   | 14.758828 |
| O  | 0.855583  | 2.778203   | 9.957976  |
| Ti | -4.896609 | -5.146406  | 10.775141 |
| O  | -4.463599 | -4.300563  | 12.473059 |
| Ti | -4.125802 | -4.747845  | 14.247248 |
| Ti | -6.240080 | -8.158371  | 10.219663 |
| O  | -4.652272 | -6.833735  | 14.343533 |
| O  | -6.206231 | -9.397657  | 11.651782 |
| Ti | -5.530528 | -8.343589  | 13.119246 |
| O  | -5.273785 | -6.963952  | 11.676547 |
| O  | -3.330761 | -3.841063  | 9.966560  |
| O  | -2.437658 | -3.490129  | 14.365700 |
| O  | -1.089930 | -4.291600  | 20.405644 |
| O  | -0.692589 | -4.641905  | 16.025129 |
| O  | 0.207376  | -0.571566  | 19.481107 |
| O  | 0.981853  | -0.924782  | 16.705796 |
| O  | 1.414708  | 1.864490   | 18.216168 |
| Ti | 1.244754  | 0.955522   | 16.623943 |
| Ti | 1.291277  | 0.994076   | 19.921166 |
| Ti | 0.071582  | -2.574039  | 19.693469 |
| O  | -0.621930 | -3.197752  | 18.014700 |
| Ti | 0.561551  | -2.761989  | 16.266255 |
| O  | -5.613250 | -10.991996 | 20.321607 |
| O  | -2.740862 | -11.348030 | 15.677444 |
| O  | -2.372847 | -10.813999 | 20.202221 |
| O  | -3.383526 | -7.738879  | 20.176279 |
| Ti | -4.004357 | -9.717092  | 19.775841 |
| O  | -4.049182 | -10.028061 | 18.004909 |
| O  | -2.149183 | -8.363923  | 15.927574 |
| Ti | -4.297481 | -10.270613 | 16.017612 |
| O  | -6.095817 | -10.865464 | 15.837479 |
| O  | 0.451932  | -6.533791  | 20.713549 |
| Ti | -1.660740 | -6.353308  | 20.118167 |
| O  | -1.775645 | -6.282270  | 18.279498 |
| O  | -0.414959 | -7.002806  | 14.392932 |
| Ti | -1.608022 | -6.546896  | 16.362944 |
| O  | 2.266436  | -2.479492  | 14.983952 |
| Ti | 3.639145  | -3.734620  | 15.741599 |
| O  | 2.235317  | -3.651249  | 17.256139 |
| O  | 2.075674  | -2.216684  | 19.638194 |
| Ti | 3.336965  | -3.667644  | 18.902781 |
| O  | 5.096148  | -4.989063  | 19.383440 |
| O  | 5.485381  | -5.124442  | 15.350987 |
| O  | 3.249793  | 0.934474   | 20.072936 |
| O  | 3.054688  | 0.861537   | 15.951981 |
| O  | 5.018182  | -2.094171  | 15.513042 |
| Ti | 4.821921  | -0.017566  | 15.714604 |
| O  | 4.897548  | 0.049583   | 17.671637 |

|    |           |            |           |
|----|-----------|------------|-----------|
| O  | 4.641655  | -2.094198  | 19.162534 |
| Ti | 4.622055  | -0.140155  | 19.507633 |
| O  | 6.413965  | 0.176742   | 20.466533 |
| O  | 7.341815  | -1.604414  | 18.287473 |
| O  | 7.827327  | -1.888108  | 15.338164 |
| O  | 6.803462  | 0.647898   | 15.807070 |
| O  | 8.383089  | 0.942844   | 18.084011 |
| Ti | 8.176975  | -0.345146  | 16.634053 |
| O  | 9.897132  | -0.002372  | 15.410955 |
| Ti | 8.093384  | -0.196093  | 19.511321 |
| O  | 10.126230 | -0.210020  | 19.762185 |
| Ti | 10.834183 | -1.591162  | 18.859196 |
| Ti | 11.110155 | -1.463123  | 15.966747 |
| O  | 10.643588 | -3.014061  | 20.143199 |
| Ti | 9.760829  | -4.775518  | 19.408919 |
| O  | 10.745237 | -5.051710  | 17.844171 |
| O  | 11.099184 | -3.400295  | 15.654323 |
| Ti | 9.992881  | -5.050637  | 16.082594 |
| O  | 9.627808  | -1.832415  | 17.374679 |
| O  | 9.582182  | -6.662618  | 19.855840 |
| O  | 8.088131  | -4.082907  | 19.038671 |
| Ti | 6.346575  | -3.272035  | 18.940757 |
| O  | 12.174340 | -1.203252  | 17.530223 |
| O  | 5.136323  | -3.683412  | 17.320196 |
| O  | 8.237726  | -4.420643  | 16.244995 |
| Ti | 6.647287  | -3.495498  | 15.730417 |
| Ti | 1.356125  | -6.703709  | 15.428298 |
| O  | 0.503611  | -6.715127  | 17.231473 |
| Ti | 1.667042  | -6.932955  | 18.778181 |
| Ti | -1.158188 | -10.345282 | 15.724559 |
| O  | 0.813013  | -8.679404  | 19.410410 |
| O  | 0.906624  | -11.363218 | 19.412113 |
| O  | -1.003711 | -9.916245  | 17.626382 |
| Ti | -0.703559 | -10.095356 | 19.397979 |
| O  | 1.225487  | -8.664192  | 15.497277 |
| Ti | 5.708756  | -10.128561 | 18.488330 |
| O  | 5.877647  | -11.202554 | 17.018246 |
| Ti | 5.172969  | -10.522988 | 15.336296 |
| O  | 5.247091  | -8.465700  | 17.648253 |
| O  | 3.706294  | -11.652419 | 15.170149 |
| O  | 4.321062  | -10.953038 | 19.628554 |
| O  | 3.174984  | -8.265800  | 19.691555 |
| Ti | 2.477211  | -10.161810 | 19.138781 |
| O  | 2.588754  | -10.146020 | 17.344372 |
| O  | 3.994215  | -8.860146  | 15.351061 |
| Ti | 2.107480  | -10.531690 | 15.435977 |
| O  | 0.438262  | -11.397513 | 15.485110 |
| O  | 3.061715  | -5.708358  | 15.696686 |
| O  | 2.087365  | -5.154586  | 19.553154 |
| Ti | 8.344451  | -8.087507  | 19.078520 |
| O  | 8.967039  | -8.656689  | 17.415052 |
| O  | 9.625254  | -6.888474  | 15.519686 |

|    |            |           |           |
|----|------------|-----------|-----------|
| Ti | 8.173935   | -8.313395 | 15.725261 |
| O  | 7.106308   | -9.867341 | 14.990886 |
| O  | 7.435351   | -9.888155 | 19.331966 |
| O  | 6.879672   | -6.958323 | 18.948560 |
| Ti | 4.915665   | -7.052538 | 19.271728 |
| O  | 3.502785   | -6.695968 | 17.783806 |
| O  | 6.649326   | -7.271643 | 15.744999 |
| Ti | 4.679482   | -7.069332 | 16.053595 |
| Ti | -13.413350 | -1.529544 | 16.658724 |
| O  | -14.165961 | -1.223159 | 18.316191 |
| O  | -14.515070 | -2.757762 | 20.350823 |
| Ti | -13.240087 | -1.177770 | 20.039870 |
| O  | -12.730845 | 0.749729  | 21.097880 |
| O  | -13.265972 | 0.419625  | 16.111516 |
| O  | -11.640824 | -2.141660 | 16.467866 |
| Ti | -9.970447  | -3.032250 | 16.683534 |
| O  | -9.613757  | -3.201596 | 18.484096 |
| O  | -11.715461 | -2.194815 | 20.358676 |
| Ti | -9.896643  | -2.857751 | 20.334270 |
| O  | -7.879403  | -3.764535 | 20.639583 |
| O  | -8.105951  | -4.250356 | 16.402345 |
| Ti | -11.759926 | 1.332573  | 17.049380 |
| O  | -11.959705 | 2.582584  | 18.467196 |
| Ti | -11.430385 | 1.365032  | 19.864165 |
| O  | -11.900499 | -0.070535 | 18.610084 |
| O  | -9.719559  | 1.669338  | 20.413861 |
| O  | -9.931852  | 0.956736  | 16.959673 |
| O  | -8.598146  | -1.614045 | 16.295765 |
| Ti | -8.186734  | 0.226395  | 16.990664 |
| O  | -7.884872  | 0.008423  | 18.769877 |
| O  | -9.178415  | -1.132201 | 20.830408 |
| Ti | -8.038730  | 0.647912  | 20.635945 |
| O  | -6.377180  | 1.650512  | 20.699256 |
| O  | -6.565579  | -0.982468 | 21.003451 |
| O  | -6.075436  | -1.019202 | 16.560408 |
| O  | -6.866380  | 1.845440  | 16.793936 |
| O  | -4.842840  | 0.065059  | 18.691809 |
| Ti | -5.285831  | 0.760437  | 17.066507 |
| Ti | -4.905898  | 0.438527  | 20.592689 |
| Ti | -6.099851  | -2.773010 | 20.426483 |
| O  | -6.129873  | -3.151831 | 18.551178 |
| Ti | -6.390768  | -3.072849 | 16.691453 |
| Ti | -15.105164 | -8.088878 | 16.558896 |
| Ti | -16.024305 | -8.086777 | 19.363937 |
| O  | -16.316173 | -6.536045 | 15.818244 |
| Ti | -15.287191 | -4.870947 | 16.527576 |
| O  | -15.971411 | -4.349427 | 18.125961 |
| O  | -15.954077 | -6.268138 | 19.998105 |
| Ti | -14.909005 | -4.530415 | 19.767811 |
| O  | -14.253296 | -8.232740 | 18.434858 |
| O  | -14.303120 | -3.233321 | 16.078951 |
| O  | -13.839691 | -6.141959 | 16.738729 |

|    |            |            |           |
|----|------------|------------|-----------|
| Ti | -11.962390 | -6.714251  | 16.563878 |
| O  | -16.772044 | -8.195479  | 17.713638 |
| O  | -10.790879 | -6.363627  | 18.144903 |
| O  | -13.194531 | -5.175367  | 19.341775 |
| Ti | -11.811231 | -6.336664  | 19.959839 |
| Ti | -13.424095 | -10.520109 | 16.573632 |
| O  | -15.105249 | -9.972869  | 16.032043 |
| O  | -12.065318 | -8.262018  | 19.452959 |
| O  | -11.605932 | -10.583928 | 20.312061 |
| O  | -13.447609 | -11.141989 | 18.311815 |
| Ti | -13.372001 | -9.795974  | 19.671558 |
| O  | -15.397943 | -9.910774  | 20.045833 |
| O  | -12.654143 | -8.664821  | 16.486650 |
| O  | -8.874421  | -9.792051  | 15.222321 |
| O  | -9.001546  | -10.529480 | 20.444711 |
| O  | -9.404404  | -7.683333  | 20.205127 |
| Ti | -10.271047 | -9.314746  | 19.417354 |
| O  | -10.320365 | -9.780678  | 17.633339 |
| O  | -10.145101 | -7.622335  | 15.944956 |
| Ti | -10.769993 | -9.725848  | 15.732450 |
| O  | -12.012560 | -11.200173 | 15.553554 |
| O  | -10.767215 | -4.888722  | 16.173321 |
| O  | -10.400396 | -4.929892  | 20.518673 |
| O  | -6.675681  | -5.930133  | 21.184903 |
| Ti | -8.477260  | -5.839512  | 20.256922 |
| O  | -7.994192  | -5.960340  | 18.497743 |
| O  | -7.393267  | -7.195559  | 16.316334 |
| Ti | -8.990360  | -6.108446  | 16.850486 |
| O  | -4.431648  | -2.957777  | 15.683300 |
| Ti | -2.475659  | -3.564626  | 16.664378 |
| O  | -3.397725  | -3.142295  | 18.280657 |
| O  | -4.211580  | -1.809692  | 20.776462 |
| Ti | -2.941205  | -3.226673  | 20.079585 |
| O  | -3.248631  | 1.332927   | 20.677799 |
| O  | -3.586174  | 1.491850   | 16.461854 |
| O  | -1.510654  | -1.789773  | 16.144626 |
| Ti | -2.105367  | 0.089070   | 16.718631 |
| O  | -2.092491  | -0.015859  | 18.516980 |
| O  | -1.630081  | -1.718647  | 20.709222 |
| Ti | -1.563347  | 0.519475   | 20.362075 |
| O  | -0.227178  | 1.900585   | 20.569862 |
| O  | -0.701415  | 1.191176   | 16.061951 |
| Ti | -5.354334  | -6.545988  | 16.422944 |
| O  | -5.255280  | -6.073905  | 18.281990 |
| Ti | -5.108383  | -6.475877  | 20.100865 |
| Ti | -7.137021  | -9.294075  | 16.228670 |
| O  | -5.783892  | -8.434060  | 20.276685 |
| O  | -7.499762  | -9.505202  | 18.154700 |
| Ti | -7.209499  | -9.893021  | 19.967053 |
| O  | -5.130399  | -8.441629  | 16.462612 |
| O  | -3.438924  | -5.420026  | 16.381438 |
| O  | -3.626759  | -5.097274  | 20.424918 |

|    |           |            |           |
|----|-----------|------------|-----------|
| O  | -2.651651 | -6.009953  | 26.783920 |
| O  | -2.003007 | -6.087474  | 22.225112 |
| O  | -1.065004 | -2.551276  | 26.094887 |
| O  | -0.576830 | -2.385831  | 23.337580 |
| O  | 0.103526  | 0.216025   | 24.842733 |
| Ti | 0.166521  | -0.663880  | 23.168579 |
| Ti | -0.323239 | -0.838425  | 26.329820 |
| Ti | -1.699362 | -4.462572  | 26.014958 |
| O  | -2.026505 | -4.776398  | 24.222210 |
| Ti | -0.820639 | -4.230424  | 22.555013 |
| O  | -5.630577 | -12.674621 | 26.803566 |
| O  | -3.368979 | -12.748754 | 21.400505 |
| O  | -2.765598 | -12.138301 | 26.514993 |
| O  | -4.179175 | -9.540239  | 26.504742 |
| Ti | -4.432558 | -11.407137 | 25.896483 |
| O  | -4.371749 | -11.502413 | 24.068651 |
| O  | -3.994655 | -9.665234  | 22.119789 |
| Ti | -4.791022 | -11.825071 | 22.128697 |
| O  | -6.035342 | -13.298655 | 22.229946 |
| O  | -1.233561 | -8.347154  | 26.616101 |
| Ti | -3.029179 | -7.916467  | 26.185156 |
| O  | -3.003507 | -8.011880  | 24.350046 |
| O  | -1.281622 | -8.412442  | 20.729844 |
| Ti | -2.661665 | -8.110137  | 22.381581 |
| O  | 0.957558  | -3.484639  | 21.565497 |
| Ti | 2.055294  | -5.425892  | 21.688518 |
| O  | 0.864187  | -5.083593  | 23.464550 |
| O  | 0.126127  | -4.830461  | 26.499352 |
| Ti | 1.458053  | -5.229931  | 25.307713 |
| O  | 3.366206  | -6.105972  | 25.872881 |
| O  | 4.016724  | -6.526266  | 21.167003 |
| O  | 1.483250  | -1.242448  | 26.818692 |
| O  | 1.444486  | -0.261036  | 21.742269 |
| O  | 3.494032  | -3.765180  | 21.196829 |
| Ti | 2.582596  | -1.975947  | 21.683135 |
| O  | 2.192330  | -1.688930  | 23.705987 |
| O  | 2.778789  | -3.686107  | 25.598178 |
| Ti | 2.723349  | -1.774484  | 25.522047 |
| O  | 4.331188  | -0.811453  | 25.897729 |
| O  | 5.292770  | -3.109386  | 24.682687 |
| O  | 6.229850  | -3.210831  | 21.028071 |
| O  | 4.416329  | -1.261045  | 21.634450 |
| O  | 6.302251  | -0.407626  | 23.572109 |
| Ti | 6.350964  | -1.388290  | 21.933749 |
| O  | 8.388110  | -1.361352  | 21.196001 |
| Ti | 5.918516  | -1.409971  | 25.088894 |
| O  | 7.670258  | -1.755314  | 25.825869 |
| Ti | 8.531206  | -3.012465  | 24.735252 |
| Ti | 9.324489  | -2.888154  | 21.953230 |
| O  | 8.687143  | -4.658039  | 25.559262 |
| Ti | 7.920252  | -6.337575  | 24.983424 |
| O  | 9.089993  | -6.762591  | 23.586243 |

|    |            |            |           |
|----|------------|------------|-----------|
| O  | 9.440832   | -4.764446  | 21.587408 |
| Ti | 8.566972   | -6.605666  | 21.790125 |
| O  | 7.530116   | -2.956444  | 23.084009 |
| O  | 7.461649   | -7.898741  | 25.865518 |
| O  | 6.181086   | -5.664132  | 24.694789 |
| Ti | 4.460863   | -4.884287  | 24.811598 |
| O  | 10.085263  | -2.603641  | 23.658490 |
| O  | 3.708143   | -5.072928  | 23.128088 |
| O  | 6.815427   | -5.926835  | 21.822582 |
| Ti | 5.212877   | -4.895318  | 21.569107 |
| Ti | 0.561720   | -8.568087  | 21.705788 |
| O  | -0.678819  | -8.350502  | 23.305022 |
| Ti | -0.103444  | -8.650728  | 25.146292 |
| Ti | -1.584333  | -12.169505 | 21.756990 |
| O  | -0.519607  | -10.549875 | 25.122295 |
| O  | 0.363295   | -12.916861 | 25.929480 |
| O  | -1.683816  | -12.649594 | 23.616441 |
| Ti | -1.319876  | -12.295696 | 25.380451 |
| O  | -0.302022  | -10.534319 | 21.691514 |
| Ti | 4.569380   | -11.653901 | 24.389333 |
| O  | 4.930162   | -12.994050 | 23.143411 |
| Ti | 4.627990   | -11.956680 | 21.536560 |
| O  | 4.119783   | -10.434445 | 22.844114 |
| O  | 3.021977   | -12.792206 | 20.935092 |
| O  | 3.254657   | -11.975082 | 25.635549 |
| O  | 1.872418   | -9.564469  | 25.299195 |
| Ti | 1.460974   | -11.552470 | 25.086011 |
| O  | 1.504540   | -11.871945 | 23.296000 |
| O  | 2.168450   | -9.897069  | 21.414508 |
| Ti | 1.309773   | -12.085488 | 21.356405 |
| O  | -0.172837  | -13.278927 | 21.185029 |
| O  | 2.034993   | -7.438124  | 22.502376 |
| O  | 1.196644   | -7.183338  | 25.296817 |
| Ti | 6.034126   | -8.917688  | 25.049780 |
| O  | 6.791023   | -8.979003  | 23.224929 |
| O  | 8.591294   | -8.506514  | 21.173263 |
| Ti | 6.956334   | -9.626270  | 21.488445 |
| O  | 6.481318   | -11.450067 | 21.352145 |
| O  | 6.016255   | -10.819201 | 25.203021 |
| O  | 4.574087   | -8.620744  | 26.341121 |
| Ti | 3.169068   | -8.051898  | 25.288606 |
| O  | 4.383802   | -8.117089  | 23.769426 |
| O  | 5.428348   | -8.642140  | 20.689616 |
| Ti | 3.676090   | -8.568869  | 21.889731 |
| Ti | -14.055639 | -3.089994  | 22.510685 |
| O  | -14.963475 | -3.242220  | 24.200349 |
| O  | -15.501337 | -4.756434  | 26.643887 |
| Ti | -14.324652 | -3.424318  | 25.931842 |
| O  | -14.185080 | -1.662139  | 26.655629 |
| O  | -14.082023 | -1.098249  | 22.027721 |
| O  | -12.459551 | -4.111487  | 22.414097 |
| Ti | -10.816937 | -4.936187  | 22.792560 |

|    |            |            |           |
|----|------------|------------|-----------|
| O  | -10.390550 | -4.639144  | 24.650104 |
| O  | -12.606166 | -4.107180  | 26.409925 |
| Ti | -10.793535 | -4.658747  | 26.435334 |
| O  | -8.877659  | -5.711500  | 26.972495 |
| O  | -8.823593  | -5.884489  | 22.471399 |
| Ti | -12.667406 | -0.161357  | 23.029265 |
| O  | -13.045305 | 0.653239   | 24.714286 |
| Ti | -12.712894 | -0.905957  | 25.765572 |
| O  | -12.669959 | -1.941745  | 24.145945 |
| O  | -11.200522 | -0.861709  | 26.847623 |
| O  | -10.849498 | -0.224258  | 22.840516 |
| O  | -9.567661  | -3.270089  | 22.505435 |
| Ti | -9.256359  | -1.296858  | 22.928623 |
| O  | -9.262037  | -1.331140  | 24.842139 |
| O  | -9.599868  | -3.277252  | 27.192742 |
| Ti | -9.359899  | -1.402065  | 26.675829 |
| O  | -8.117588  | -0.176326  | 27.489147 |
| O  | -7.212230  | -2.382150  | 26.297546 |
| O  | -7.162022  | -2.305978  | 23.196337 |
| O  | -8.023782  | 0.403896   | 22.761869 |
| O  | -6.223095  | 0.180492   | 25.022949 |
| Ti | -6.411155  | -0.536709  | 23.271402 |
| Ti | -6.481694  | -0.673358  | 26.638337 |
| Ti | -7.674600  | -4.280268  | 26.382590 |
| O  | -7.404479  | -4.773758  | 24.599836 |
| Ti | -7.410542  | -4.329204  | 22.747412 |
| Ti | -15.743213 | -9.945326  | 22.059687 |
| Ti | -15.973540 | -9.231863  | 24.906618 |
| O  | -16.536708 | -8.185713  | 21.458908 |
| Ti | -15.264560 | -6.678410  | 22.065859 |
| O  | -15.488110 | -6.244156  | 23.961253 |
| O  | -16.769465 | -7.858304  | 25.889287 |
| Ti | -15.505682 | -6.413064  | 25.795395 |
| O  | -14.722048 | -8.611772  | 23.461865 |
| O  | -15.144790 | -4.720929  | 21.859101 |
| O  | -13.546069 | -7.217948  | 21.363159 |
| Ti | -12.539464 | -8.304244  | 22.802982 |
| O  | -16.920653 | -10.147144 | 23.618821 |
| O  | -12.226582 | -6.791303  | 24.146783 |
| O  | -13.987219 | -7.362155  | 26.468021 |
| Ti | -12.276818 | -7.664119  | 25.787801 |
| Ti | -13.597093 | -11.995301 | 22.426977 |
| O  | -15.392740 | -11.886470 | 21.959000 |
| O  | -12.662702 | -9.438797  | 24.667954 |
| O  | -11.997216 | -11.590317 | 26.566054 |
| O  | -13.687873 | -12.343949 | 24.259318 |
| Ti | -13.382707 | -11.013446 | 25.506238 |
| O  | -15.071393 | -10.411232 | 26.066598 |
| O  | -13.517617 | -10.024873 | 21.907048 |
| O  | -8.982863  | -12.568095 | 21.916881 |
| O  | -8.968312  | -11.584069 | 26.841394 |
| O  | -10.662313 | -9.000946  | 26.296258 |



|    |            |            |           |
|----|------------|------------|-----------|
| Ti | -10.364786 | -10.870326 | 25.801039 |
| O  | -10.242899 | -11.165866 | 24.004217 |
| O  | -10.800622 | -9.307302  | 22.496417 |
| Ti | -10.447339 | -11.329131 | 21.926015 |
| O  | -11.975254 | -12.604727 | 21.902028 |
| O  | -11.176859 | -6.866998  | 21.954165 |
| O  | -11.158295 | -6.588222  | 26.945195 |
| O  | -7.703434  | -8.288242  | 27.037700 |
| Ti | -9.238756  | -7.515590  | 26.319984 |
| O  | -9.180029  | -7.706225  | 24.450657 |
| O  | -7.744793  | -8.716654  | 21.802624 |
| Ti | -9.325702  | -7.891696  | 22.544696 |
| O  | -5.449790  | -3.961847  | 22.012742 |
| Ti | -3.912959  | -5.094626  | 22.882021 |
| O  | -4.716327  | -5.036478  | 24.635876 |
| O  | -6.146227  | -4.660675  | 27.424778 |
| Ti | -4.609248  | -5.164739  | 26.497984 |
| O  | -4.758666  | -0.971101  | 27.281867 |
| O  | -4.588298  | -0.204872  | 22.662921 |
| O  | -2.856669  | -3.389453  | 22.335036 |
| Ti | -2.932797  | -1.356939  | 22.591528 |
| O  | -3.262130  | -1.506476  | 24.527031 |
| O  | -3.436189  | -3.517798  | 26.816832 |
| Ti | -3.191225  | -1.594836  | 26.376273 |
| O  | -1.911677  | -0.267148  | 27.095735 |
| O  | -1.501062  | 0.074599   | 22.453783 |
| Ti | -5.853636  | -8.684791  | 22.561718 |
| O  | -6.177120  | -7.994977  | 24.293582 |
| Ti | -6.084702  | -8.525913  | 26.074957 |
| Ti | -7.470708  | -12.385567 | 22.932534 |
| O  | -6.542779  | -10.428163 | 25.726247 |
| O  | -7.707333  | -13.095707 | 24.680848 |
| Ti | -7.284210  | -12.111767 | 26.168912 |
| O  | -6.606158  | -10.636094 | 22.819022 |
| O  | -4.550113  | -6.996621  | 22.396691 |
| O  | -4.916206  | -7.123599  | 26.835174 |

48c-like 3-D (2,2,0)-mer

|    |          |          |           |
|----|----------|----------|-----------|
| O  | 2.339480 | 2.192815 | 2.148448  |
| O  | 2.162026 | 2.024931 | -2.736966 |
| O  | 4.423113 | 5.439450 | 1.336711  |
| O  | 4.333464 | 5.077493 | -1.756348 |
| O  | 5.897397 | 7.497930 | -0.493136 |
| Ti | 5.376633 | 6.621978 | -2.053602 |
| Ti | 5.522885 | 7.000833 | 1.267458  |
| Ti | 3.654869 | 3.619817 | 1.465857  |
| O  | 3.509450 | 2.871479 | -0.251328 |
| Ti | 3.543886 | 3.279925 | -2.071790 |
| O  | 5.060577 | 2.592000 | -2.930509 |
| Ti | 6.529214 | 1.745215 | -2.129681 |
| O  | 6.497274 | 1.817920 | -0.251947 |
| O  | 5.238119 | 2.952975 | 2.168280  |

|    |           |           |           |
|----|-----------|-----------|-----------|
| Ti | 6.642333  | 1.778459  | 1.651937  |
| O  | 8.551502  | 0.667661  | 2.081386  |
| O  | 8.292877  | 0.629803  | -2.769883 |
| O  | 7.113780  | 6.592699  | 2.161116  |
| O  | 6.965143  | 5.961800  | -2.773638 |
| O  | 7.918882  | 3.182828  | -2.448515 |
| Ti | 8.422405  | 5.025830  | -1.985176 |
| O  | 8.430391  | 5.206293  | -0.132875 |
| O  | 8.008077  | 3.391653  | 1.992336  |
| Ti | 8.599488  | 5.481538  | 1.823374  |
| O  | 10.061639 | 6.823764  | 1.898086  |
| O  | 10.557673 | 4.156445  | 1.552605  |
| O  | 10.409945 | 3.658960  | -1.916131 |
| O  | 9.882513  | 6.060482  | -2.813027 |
| O  | 11.734943 | 6.306617  | -0.567973 |
| Ti | 11.378239 | 5.261583  | -2.067769 |
| O  | 13.089973 | 4.465363  | -2.380305 |
| Ti | 11.462845 | 5.866671  | 1.222973  |
| O  | 13.130174 | 5.423770  | 1.921622  |
| Ti | 13.424718 | 3.543285  | 1.605978  |
| Ti | 13.558712 | 3.091364  | -1.194109 |
| O  | 14.008142 | 1.864509  | 2.505680  |
| Ti | 12.845001 | 0.237678  | 1.924104  |
| O  | 13.057337 | -0.093950 | 0.097415  |
| O  | 13.909743 | 1.476172  | -2.038174 |
| Ti | 12.667343 | 0.022066  | -1.760708 |
| O  | 12.213713 | 2.884532  | 0.214069  |
| O  | 11.231649 | 1.081001  | 2.204632  |
| Ti | 9.840567  | 2.299922  | 1.574076  |
| O  | 14.728588 | 3.621226  | 0.208316  |
| O  | 9.399277  | 1.645509  | -0.133821 |
| O  | 11.149779 | 0.880158  | -2.403500 |
| Ti | 9.586746  | 1.855694  | -1.950995 |
| O  | 0.310400  | -1.260574 | 1.987585  |
| O  | 0.344807  | -1.259115 | -2.478536 |
| Ti | 1.674609  | 0.258326  | 1.687934  |
| O  | 1.640579  | 0.307905  | -0.207253 |
| Ti | 1.614760  | 0.200499  | -2.075279 |
| O  | -3.981711 | -7.916188 | 2.159165  |
| O  | -0.729744 | -7.332505 | -2.765583 |
| O  | -0.991838 | -7.884039 | 1.909749  |
| O  | -1.752272 | -4.692490 | 1.942390  |
| Ti | -2.380717 | -6.584072 | 1.697951  |
| O  | -2.291048 | -6.577203 | -0.223654 |
| O  | -1.722057 | -4.570886 | -2.535870 |
| Ti | -2.268298 | -6.394889 | -2.084945 |
| O  | -3.714321 | -7.492049 | -2.809384 |
| O  | 1.087760  | -4.196457 | 2.105405  |
| Ti | -0.390703 | -3.155846 | 1.626361  |
| O  | -0.330667 | -3.188924 | -0.278775 |
| O  | 1.202923  | -3.965991 | -2.838553 |
| Ti | -0.323283 | -3.121763 | -2.146902 |

|    |           |           |           |
|----|-----------|-----------|-----------|
| O  | 3.141425  | -0.695815 | -2.690934 |
| Ti | 4.672330  | -1.568780 | -2.043331 |
| O  | 4.690437  | -1.646358 | -0.185888 |
| O  | 3.178752  | -0.766837 | 2.071764  |
| Ti | 4.769671  | -1.702144 | 1.722911  |
| O  | 6.678498  | -2.879311 | 2.067963  |
| O  | 6.541818  | -2.668329 | -2.433749 |
| O  | 5.933494  | -0.119147 | -2.480424 |
| O  | 6.050960  | -0.136622 | 1.928008  |
| O  | 12.582181 | -1.669378 | 2.314467  |
| Ti | 11.214933 | -3.013172 | 1.750394  |
| O  | 11.349356 | -3.125499 | -0.129985 |
| O  | 12.447254 | -1.732163 | -2.385824 |
| Ti | 11.000908 | -2.932968 | -1.968335 |
| O  | 10.981943 | -4.921273 | 2.162100  |
| O  | 9.644248  | -2.056505 | 1.917829  |
| Ti | 7.902774  | -1.319137 | 1.651236  |
| O  | 7.814801  | -1.150915 | -0.220439 |
| O  | 9.471390  | -2.004885 | -2.461005 |
| Ti | 7.782767  | -1.203500 | -2.080837 |
| Ti | 2.736770  | -4.593960 | -1.948673 |
| O  | 2.794370  | -4.303543 | -0.125748 |
| Ti | 2.753249  | -4.936056 | 1.672331  |
| Ti | 0.882241  | -7.930892 | -2.075765 |
| O  | 1.910915  | -6.812005 | 1.538726  |
| O  | 2.133434  | -9.438503 | 2.066380  |
| O  | 0.511520  | -8.798213 | -0.448590 |
| Ti | 0.711746  | -8.303740 | 1.340583  |
| O  | 1.942777  | -6.414198 | -1.703180 |
| Ti | 7.142356  | -8.654725 | 1.357877  |
| O  | 7.420014  | -9.695640 | -0.170772 |
| Ti | 7.069894  | -8.253820 | -1.413358 |
| O  | 6.651753  | -7.193489 | 0.167163  |
| O  | 5.553578  | -8.451504 | -2.449800 |
| O  | 5.331270  | -9.204981 | 2.096938  |
| O  | 4.498874  | -6.300739 | 2.032854  |
| Ti | 3.737654  | -8.136276 | 1.669356  |
| O  | 3.708021  | -8.167206 | -0.199285 |
| O  | 4.453648  | -5.895428 | -2.424146 |
| Ti | 3.817929  | -7.714528 | -2.041328 |
| O  | 2.407921  | -8.698042 | -2.915240 |
| O  | 4.133592  | -3.396352 | -2.653095 |
| O  | 4.229509  | -3.619859 | 2.174881  |
| Ti | 9.556714  | -6.116959 | 1.542059  |
| O  | 10.007939 | -6.267601 | -0.272491 |
| O  | 10.568148 | -4.675208 | -2.597400 |
| Ti | 9.276534  | -5.909094 | -1.956266 |
| O  | 8.608025  | -7.691933 | -2.295458 |
| O  | 8.902679  | -7.977510 | 1.895952  |
| O  | 8.057564  | -5.072151 | 1.593312  |
| Ti | 6.106045  | -4.934700 | 1.814896  |
| O  | 5.708887  | -4.596840 | -0.069825 |

|    |            |           |           |
|----|------------|-----------|-----------|
| O  | 7.606329   | -5.133779 | -2.260317 |
| Ti | 5.843941   | -4.490761 | -1.885209 |
| Ti | -8.968459  | 5.767658  | -1.768175 |
| O  | -9.076676  | 5.704247  | 0.137866  |
| O  | -10.799847 | 5.042558  | 2.207715  |
| Ti | -9.132358  | 6.028289  | 1.991393  |
| O  | -8.427475  | 7.838014  | 2.516086  |
| O  | -8.526166  | 7.622356  | -1.798908 |
| O  | -7.389302  | 5.194904  | -2.565326 |
| Ti | -5.709739  | 4.439354  | -2.079264 |
| O  | -5.736523  | 4.517555  | -0.236631 |
| O  | -7.587069  | 5.131500  | 2.718024  |
| Ti | -5.812462  | 4.996072  | 1.633219  |
| O  | -4.045238  | 3.758503  | 2.012265  |
| O  | -3.990340  | 3.343925  | -2.735947 |
| Ti | -6.905377  | 8.021750  | -0.954446 |
| O  | -7.186302  | 9.393205  | 0.317097  |
| Ti | -6.653994  | 8.438287  | 1.858353  |
| O  | -6.414923  | 6.833938  | 0.629985  |
| O  | -5.001425  | 9.307310  | 2.168304  |
| O  | -5.489513  | 8.226800  | -2.078825 |
| O  | -4.278964  | 5.846905  | -2.433707 |
| Ti | -3.629143  | 7.642965  | -1.826713 |
| O  | -3.522741  | 7.955400  | -0.016086 |
| O  | -4.263038  | 6.336802  | 2.103059  |
| Ti | -3.359054  | 8.425371  | 1.890775  |
| O  | -1.809216  | 9.578399  | 1.937574  |
| O  | -1.658094  | 6.880787  | 1.555740  |
| O  | -1.756701  | 6.361253  | -1.714395 |
| O  | -2.311398  | 8.705779  | -2.739962 |
| O  | -0.226630  | 8.792055  | -0.504684 |
| Ti | -0.708395  | 7.907412  | -2.069310 |
| Ti | -0.495752  | 8.397167  | 1.309080  |
| Ti | -2.568734  | 5.092758  | 1.526970  |
| O  | -2.623690  | 4.281373  | -0.185456 |
| Ti | -2.597305  | 4.566519  | -2.022465 |
| O  | -10.426372 | 4.806826  | -2.450295 |
| O  | -1.062287  | 3.933255  | -2.885891 |
| Ti | 0.455834   | 3.155867  | -2.100797 |
| O  | 0.485008   | 3.315717  | -0.220229 |
| O  | -0.936506  | 4.438258  | 2.181684  |
| Ti | 0.488060   | 3.329795  | 1.680824  |
| O  | 1.132496   | 8.062731  | 2.123159  |
| O  | 0.877089   | 7.291567  | -2.795632 |
| O  | 1.861540   | 4.576094  | -2.483724 |
| Ti | 2.395837   | 6.416486  | -1.977668 |
| O  | 2.285503   | 6.579233  | -0.133649 |
| O  | 1.936629   | 4.805231  | 2.080196  |
| Ti | 2.599302   | 6.894392  | 1.787667  |
| O  | 4.150584   | 8.085122  | 1.874521  |
| O  | 3.846290   | 7.480592  | -2.720098 |
| Ti | -10.934180 | 3.010770  | -1.998664 |

|    |            |           |           |
|----|------------|-----------|-----------|
| O  | -11.416368 | 3.282503  | -0.214584 |
| O  | -12.561286 | 1.811151  | 2.010003  |
| Ti | -11.209444 | 3.189336  | 1.668725  |
| O  | -9.364359  | 2.122677  | -2.451666 |
| Ti | -7.728525  | 1.204392  | -2.103228 |
| O  | -7.748549  | 1.174809  | -0.246898 |
| O  | -9.560601  | 2.348873  | 1.754542  |
| Ti | -7.879527  | 1.479043  | 1.638944  |
| O  | -6.030051  | 0.261922  | 1.896432  |
| O  | -5.916334  | 0.160779  | -2.781401 |
| O  | -6.464416  | 2.648701  | -2.555749 |
| O  | -6.615058  | 3.023255  | 1.890574  |
| Ti | -4.711755  | 1.821078  | 1.559603  |
| O  | -4.686147  | 1.618871  | -0.334166 |
| Ti | -4.605411  | 1.517175  | -2.199685 |
| Ti | -13.593816 | -3.229382 | -1.309145 |
| Ti | -14.239849 | -3.446023 | 1.466662  |
| O  | -13.526745 | -1.586810 | -2.114873 |
| Ti | -12.588858 | 0.102908  | -1.759296 |
| O  | -13.553761 | 0.436150  | -0.201936 |
| O  | -14.237022 | -1.562141 | 1.865996  |
| Ti | -12.988943 | -0.014119 | 1.531841  |
| O  | -12.559194 | -3.536443 | 0.368958  |
| O  | -12.289843 | 1.779405  | -2.569309 |
| O  | -10.904251 | -0.639571 | -1.668207 |
| Ti | -9.415238  | -1.851726 | -1.595501 |
| O  | -15.136230 | -3.539346 | -0.169825 |
| O  | -8.743461  | -1.892772 | 0.133538  |
| O  | -11.359039 | -0.924235 | 1.386130  |
| Ti | -9.865060  | -2.001079 | 1.822502  |
| Ti | -11.319987 | -5.139186 | -1.794457 |
| O  | -13.074570 | -4.645507 | -2.403737 |
| O  | -10.572427 | -3.869110 | 1.971521  |
| O  | -10.162903 | -6.392243 | 2.164318  |
| O  | -11.683448 | -6.135998 | -0.239014 |
| Ti | -11.725109 | -5.389196 | 1.485253  |
| O  | -13.503775 | -5.174909 | 2.274561  |
| O  | -10.583002 | -3.414717 | -1.638505 |
| O  | -6.888372  | -6.095210 | -2.666989 |
| O  | -7.114843  | -6.467468 | 1.956678  |
| O  | -7.928840  | -3.265544 | 2.032064  |
| Ti | -8.502974  | -5.170346 | 1.785678  |
| O  | -8.483807  | -5.118251 | -0.143304 |
| O  | -7.848304  | -3.205338 | -2.424173 |
| Ti | -8.282710  | -5.019923 | -2.008161 |
| O  | -9.875515  | -5.844164 | -2.729996 |
| O  | -8.280887  | -0.660540 | -2.678917 |
| O  | -8.563769  | -0.418685 | 2.124581  |
| O  | -5.288759  | -2.644254 | 1.946550  |
| Ti | -6.791206  | -1.595505 | 1.409442  |
| O  | -6.213608  | -1.593383 | -0.449665 |
| O  | -4.948013  | -2.622117 | -2.990251 |

|    |           |           |           |
|----|-----------|-----------|-----------|
| Ti | -6.401225 | -1.698086 | -2.275163 |
| O  | -3.056850 | 0.640502  | -2.771800 |
| Ti | -1.501671 | -0.180270 | -2.099456 |
| O  | -1.546290 | -0.230247 | -0.238012 |
| O  | -3.078655 | 0.990035  | 1.946351  |
| Ti | -1.571311 | -0.077270 | 1.657013  |
| O  | -0.238591 | 1.303510  | -2.412920 |
| O  | -0.206097 | 1.432998  | 1.944826  |
| Ti | -3.421667 | -3.267029 | -2.062867 |
| O  | -3.355324 | -2.994911 | -0.241995 |
| Ti | -3.659777 | -3.438315 | 1.598322  |
| Ti | -5.208440 | -6.672004 | -2.039442 |
| O  | -4.305190 | -5.361800 | 1.418415  |
| O  | -5.605004 | -7.497203 | -0.399021 |
| Ti | -5.416056 | -6.912040 | 1.361981  |
| O  | -4.247806 | -5.082404 | -1.863392 |
| O  | -2.056677 | -2.015547 | -2.748079 |
| O  | -2.223418 | -1.995885 | 2.032792  |
| O  | 1.110613  | 0.470615  | 8.716470  |
| O  | 1.277707  | 0.450715  | 3.935941  |
| O  | 3.298902  | 3.537506  | 7.831817  |
| O  | 3.359226  | 3.816577  | 4.549865  |
| O  | 4.658351  | 5.952152  | 6.367770  |
| Ti | 4.469962  | 5.367389  | 4.606241  |
| Ti | 4.262150  | 5.127413  | 8.008372  |
| Ti | 2.475218  | 1.722375  | 8.030746  |
| O  | 2.409287  | 1.450700  | 6.210442  |
| Ti | 2.713934  | 1.893330  | 4.369688  |
| O  | 4.343369  | 1.100360  | 4.020676  |
| Ti | 5.845090  | 0.050648  | 4.558703  |
| O  | 5.266917  | 0.048166  | 6.417526  |
| O  | 4.003972  | 1.076760  | 8.958256  |
| Ti | 5.454929  | 0.153523  | 8.243069  |
| O  | 7.334742  | -0.883747 | 8.647312  |
| O  | 7.618029  | -1.126141 | 3.843647  |
| O  | 5.941962  | 4.550549  | 8.635915  |
| O  | 6.168098  | 4.923716  | 4.010091  |
| O  | 6.982982  | 1.719734  | 3.935611  |
| Ti | 7.555339  | 3.625509  | 4.181628  |
| O  | 7.535086  | 3.572931  | 6.110558  |
| O  | 6.901331  | 1.660542  | 8.392441  |
| Ti | 7.335687  | 3.475178  | 7.975206  |
| O  | 8.928119  | 4.301825  | 8.695151  |
| O  | 9.634419  | 1.872149  | 7.606138  |
| O  | 9.625569  | 2.324693  | 3.997631  |
| O  | 9.214053  | 4.848596  | 3.804058  |
| O  | 10.737403 | 4.592048  | 6.203774  |
| Ti | 10.778079 | 3.845938  | 4.479942  |
| O  | 12.559248 | 3.630984  | 3.693774  |
| Ti | 10.372579 | 3.596496  | 7.760417  |
| O  | 12.126750 | 3.102013  | 8.371489  |
| Ti | 12.646743 | 1.686759  | 7.277123  |

|    |           |           |          |
|----|-----------|-----------|----------|
| Ti | 13.293089 | 1.902705  | 4.502113 |
| O  | 12.582144 | 0.044367  | 8.083085 |
| Ti | 11.644294 | -1.645211 | 7.728918 |
| O  | 12.608865 | -1.979570 | 6.170490 |
| O  | 13.292202 | 0.019403  | 4.102806 |
| Ti | 12.043568 | -1.529655 | 4.436376 |
| O  | 11.612391 | 1.991655  | 5.599114 |
| O  | 9.959389  | -0.903018 | 7.636852 |
| Ti | 8.469256  | 0.307534  | 7.564837 |
| O  | 14.190246 | 1.996946  | 6.138794 |
| O  | 7.797375  | 0.347161  | 5.834910 |
| O  | 10.413345 | -0.619339 | 4.581873 |
| Ti | 8.918923  | 0.456247  | 4.146449 |
| O  | -0.707251 | -2.849087 | 8.381220 |
| O  | -0.739857 | -2.978131 | 4.023701 |
| Ti | 0.555625  | -1.365366 | 8.067781 |
| O  | 0.600450  | -1.314309 | 6.206274 |
| Ti | 0.625245  | -1.467786 | 4.311208 |
| O  | -4.792452 | -9.025848 | 8.688184 |
| O  | -2.078067 | -9.607834 | 3.845605 |
| O  | -1.822258 | -8.836418 | 8.763141 |
| O  | -2.807651 | -6.121891 | 8.451316 |
| Ti | -3.341810 | -7.962256 | 7.945690 |
| O  | -3.232330 | -8.125238 | 6.101651 |
| O  | -2.882310 | -6.350919 | 3.888177 |
| Ti | -3.545531 | -8.440017 | 4.180292 |
| O  | -5.096886 | -9.630112 | 4.093141 |
| O  | 0.116357  | -5.478320 | 8.854791 |
| Ti | -1.402192 | -4.701373 | 8.069125 |
| O  | -1.430943 | -4.861424 | 6.188529 |
| O  | -0.008630 | -5.983150 | 3.786507 |
| Ti | -1.433861 | -4.875028 | 4.287463 |
| O  | 2.132749  | -2.535012 | 4.022033 |
| Ti | 3.765624  | -3.366160 | 4.408704 |
| O  | 3.739795  | -3.164242 | 6.302491 |
| O  | 2.110904  | -2.185505 | 8.740292 |
| Ti | 3.659484  | -3.061782 | 8.167991 |
| O  | 5.518621  | -4.193794 | 8.524071 |
| O  | 5.668610  | -4.567757 | 4.078166 |
| O  | 5.084200  | -1.806707 | 4.071490 |
| O  | 4.970561  | -1.704638 | 8.749395 |
| O  | 11.345920 | -3.321722 | 8.537563 |
| Ti | 9.989601  | -4.553428 | 7.967686 |
| O  | 10.471599 | -4.825550 | 6.184119 |
| O  | 11.614986 | -3.354254 | 3.958798 |
| Ti | 10.263769 | -4.733491 | 4.300648 |
| O  | 9.480327  | -6.350556 | 8.418746 |
| O  | 8.419220  | -3.664757 | 8.420086 |
| Ti | 6.782815  | -2.748825 | 8.071292 |
| O  | 6.802393  | -2.723031 | 6.215442 |
| O  | 8.613963  | -3.892921 | 4.213571 |
| Ti | 6.933450  | -3.024102 | 4.329265 |

|    |            |            |          |
|----|------------|------------|----------|
| Ti | 1.622915   | -6.638003  | 4.442061 |
| O  | 1.677838   | -5.825888  | 6.153690 |
| Ti | 1.651081   | -6.111224  | 7.990554 |
| Ti | -0.450037  | -9.942220  | 4.659990 |
| O  | 0.811144   | -7.906153  | 7.682026 |
| O  | 1.366369   | -10.250067 | 8.709030 |
| O  | -0.719085  | -10.337872 | 6.473559 |
| Ti | -0.236699  | -9.452169  | 8.038141 |
| O  | 0.712648   | -8.426055  | 4.413931 |
| Ti | 5.961252   | -9.565602  | 6.922612 |
| O  | 6.241256   | -10.937123 | 5.650892 |
| Ti | 5.708981   | -9.982693  | 4.109582 |
| O  | 5.470031   | -8.378134  | 5.337962 |
| O  | 4.056498   | -10.851201 | 3.799866 |
| O  | 4.545259   | -9.770618  | 8.046718 |
| O  | 3.332998   | -7.391616  | 8.403070 |
| Ti | 2.685225   | -9.187781  | 7.795404 |
| O  | 2.576935   | -9.500742  | 5.984845 |
| O  | 3.317449   | -7.881732  | 3.865362 |
| Ti | 2.413462   | -9.970533  | 4.078047 |
| O  | 0.863439   | -11.123354 | 4.031468 |
| O  | 3.099277   | -5.304049  | 3.955910 |
| O  | 3.044287   | -4.888564  | 8.704416 |
| Ti | 8.024362   | -7.310261  | 7.735180 |
| O  | 8.131927   | -7.249399  | 5.829861 |
| O  | 9.854444   | -6.586944  | 3.761106 |
| Ti | 8.186674   | -7.570967  | 3.977928 |
| O  | 7.482509   | -9.382133  | 3.451236 |
| O  | 7.581860   | -9.165372  | 7.766829 |
| O  | 6.444297   | -6.737807  | 8.532932 |
| Ti | 4.763780   | -5.984301  | 8.047882 |
| O  | 4.789251   | -6.062492  | 6.205607 |
| O  | 6.641824   | -6.674419  | 3.251635 |
| Ti | 4.866373   | -6.541119  | 4.335282 |
| Ti | -10.503073 | 4.572969   | 4.427031 |
| O  | -10.953905 | 4.722622   | 6.243381 |
| O  | -11.513601 | 3.130018   | 8.566788 |
| Ti | -10.221221 | 4.362893   | 7.925925 |
| O  | -9.552441  | 6.145374   | 8.263538 |
| O  | -9.847999  | 6.433086   | 4.071770 |
| O  | -9.004473  | 3.526680   | 4.373975 |
| Ti | -7.052458  | 3.390690   | 4.154411 |
| O  | -6.654782  | 3.050309   | 6.038706 |
| O  | -8.552587  | 3.586408   | 8.229270 |
| Ti | -6.789889  | 2.943977   | 7.853888 |
| O  | -5.079133  | 1.849421   | 8.621220 |
| O  | -5.175753  | 2.075158   | 3.793801 |
| Ti | -8.086287  | 7.106065   | 4.608252 |
| O  | -8.363000  | 8.147270   | 6.137460 |
| Ti | -8.014188  | 6.704051   | 7.379103 |
| O  | -7.598633  | 5.642358   | 5.799601 |
| O  | -6.498574  | 6.904474   | 8.416591 |



|    |            |           |          |
|----|------------|-----------|----------|
| O  | -6.275482  | 7.659673  | 3.870325 |
| O  | -5.444405  | 4.755393  | 3.935337 |
| Ti | -4.682375  | 6.590918  | 4.298496 |
| O  | -4.652406  | 6.619947  | 6.167922 |
| O  | -5.399267  | 4.348519  | 8.392910 |
| Ti | -4.762730  | 6.167745  | 8.009372 |
| O  | -3.354072  | 7.152299  | 8.883325 |
| O  | -2.888518  | 4.867948  | 7.672400 |
| O  | -2.856046  | 5.266745  | 4.428279 |
| O  | -3.079095  | 7.893695  | 3.902525 |
| O  | -1.457347  | 7.251767  | 6.416692 |
| Ti | -1.656735  | 6.758503  | 4.626813 |
| Ti | -1.827645  | 6.385299  | 8.045553 |
| Ti | -3.682825  | 3.047621  | 7.917085 |
| O  | -3.739958  | 2.759227  | 6.094912 |
| Ti | -3.699250  | 3.390692  | 4.295764 |
| O  | -11.928388 | 3.377090  | 3.806874 |
| O  | -2.033579  | 2.651225  | 3.863397 |
| Ti | -0.555394  | 1.610322  | 4.342023 |
| O  | -0.616117  | 1.643140  | 6.247274 |
| O  | -2.148926  | 2.420320  | 8.807849 |
| Ti | -0.622930  | 1.576279  | 8.115234 |
| O  | -0.215979  | 5.787566  | 8.734876 |
| O  | 0.046696   | 6.339642  | 4.057976 |
| O  | 0.806344   | 3.147026  | 4.026150 |
| Ti | 1.435030   | 5.038503  | 4.270351 |
| O  | 1.343289   | 5.032195  | 6.192098 |
| O  | 0.775548   | 3.025759  | 8.503832 |
| Ti | 1.322551   | 4.849997  | 8.053587 |
| O  | 2.767740   | 5.947204  | 8.777551 |
| O  | 3.035292   | 6.371367  | 3.809164 |
| Ti | -12.160154 | 1.468929  | 4.218836 |
| O  | -12.294101 | 1.580676  | 6.100173 |
| O  | -13.393330 | 0.187461  | 8.354373 |
| Ti | -11.946401 | 1.387361  | 7.938268 |
| O  | -10.590175 | 0.512097  | 4.050373 |
| Ti | -8.848318  | -0.225965 | 4.317047 |
| O  | -8.760495  | -0.393690 | 6.188944 |
| O  | -10.417351 | 0.458875  | 8.430500 |
| Ti | -8.729062  | -0.343820 | 8.049436 |
| O  | -6.879588  | -1.428150 | 8.447544 |
| O  | -6.996593  | -1.408219 | 4.040083 |
| O  | -7.624283  | 1.334663  | 3.900050 |
| O  | -7.487840  | 1.121487  | 8.402477 |
| Ti | -5.618344  | 0.021843  | 8.011310 |
| O  | -5.635778  | 0.100970  | 6.153872 |
| Ti | -5.715481  | 0.157632  | 4.245313 |
| Ti | -14.370935 | -5.086784 | 4.362089 |
| Ti | -14.505424 | -4.635519 | 7.161936 |
| O  | -14.953976 | -3.407794 | 3.462392 |
| Ti | -13.790084 | -1.781953 | 4.044019 |
| O  | -14.002300 | -1.449095 | 5.871097 |

|    |            |           |          |
|----|------------|-----------|----------|
| O  | -14.856247 | -3.020154 | 8.006088 |
| Ti | -13.613134 | -1.566840 | 7.729236 |
| O  | -13.160682 | -4.425356 | 5.753424 |
| O  | -13.526846 | 0.125248  | 3.654244 |
| O  | -12.176870 | -2.625357 | 3.762887 |
| Ti | -10.786603 | -3.844927 | 4.394291 |
| O  | -15.674974 | -5.165417 | 5.759370 |
| O  | -10.345808 | -3.188055 | 6.101754 |
| O  | -12.096098 | -2.425747 | 8.371837 |
| Ti | -10.533502 | -3.401444 | 7.918353 |
| Ti | -12.408576 | -7.411098 | 4.746039 |
| O  | -14.074501 | -6.966960 | 4.046588 |
| O  | -11.355282 | -5.202579 | 7.881203 |
| O  | -10.829331 | -7.605510 | 8.781217 |
| O  | -12.681487 | -7.853418 | 6.536098 |
| Ti | -12.325172 | -6.807088 | 8.034841 |
| O  | -14.036253 | -6.008865 | 8.347020 |
| O  | -11.501496 | -5.701441 | 4.422594 |
| O  | -8.059736  | -8.136418 | 3.805800 |
| O  | -7.911105  | -7.507572 | 8.742388 |
| O  | -8.865319  | -4.728857 | 8.415736 |
| Ti | -9.368214  | -6.572261 | 7.952769 |
| O  | -9.375842  | -6.752830 | 6.101429 |
| O  | -8.954849  | -4.936034 | 3.974908 |
| Ti | -9.546037  | -7.026114 | 4.144621 |
| O  | -11.007904 | -8.368358 | 4.068837 |
| O  | -9.497201  | -2.212455 | 3.887062 |
| O  | -9.238935  | -2.176744 | 8.738066 |
| O  | -6.008278  | -4.137451 | 8.898163 |
| Ti | -7.475417  | -3.291895 | 8.095743 |
| O  | -7.444255  | -3.364719 | 6.220255 |
| O  | -6.182914  | -4.497179 | 3.798942 |
| Ti | -7.587794  | -3.323572 | 4.315271 |
| O  | -4.124563  | -0.777900 | 3.896795 |
| Ti | -2.620619  | -1.803416 | 4.280383 |
| O  | -2.586310  | -1.852451 | 6.175600 |
| O  | -4.087446  | -0.850453 | 8.659452 |
| Ti | -2.560498  | -1.746577 | 8.043664 |
| O  | -1.256441  | -0.284521 | 3.980409 |
| O  | -1.290650  | -0.286121 | 8.446905 |
| Ti | -4.600454  | -5.165068 | 4.502036 |
| O  | -4.455849  | -4.416203 | 6.218805 |
| Ti | -4.489652  | -4.825446 | 8.039759 |
| Ti | -6.469290  | -8.545562 | 4.699925 |
| O  | -5.280725  | -6.623277 | 7.723863 |
| O  | -6.843822  | -9.043054 | 6.460389 |
| Ti | -6.322825  | -8.166781 | 8.021105 |
| O  | -5.369151  | -6.984518 | 4.630546 |
| O  | -3.285052  | -3.738273 | 3.819704 |
| O  | -3.108083  | -3.570694 | 8.705167 |

48c-like 3-D (2,2,1)-mer

|    |           |           |           |
|----|-----------|-----------|-----------|
| O  | 2.331895  | 2.188733  | 1.878174  |
| O  | 2.222350  | 2.065354  | -2.845440 |
| O  | 4.503692  | 5.567201  | 1.418391  |
| O  | 4.225262  | 5.157307  | -1.682538 |
| O  | 5.768938  | 7.672478  | -0.789217 |
| Ti | 5.206466  | 6.654062  | -2.231192 |
| Ti | 5.395961  | 7.255676  | 1.005403  |
| Ti | 3.653103  | 3.661145  | 1.376682  |
| O  | 3.619871  | 2.863443  | -0.334080 |
| Ti | 3.563074  | 3.314918  | -2.135894 |
| O  | 5.160850  | 2.729468  | -2.971207 |
| Ti | 6.545719  | 1.694021  | -2.248744 |
| O  | 6.611503  | 1.804568  | -0.387657 |
| O  | 5.443588  | 3.234286  | 1.958958  |
| Ti | 6.804332  | 2.002534  | 1.520196  |
| O  | 8.629430  | 0.859543  | 1.981377  |
| O  | 8.326498  | 0.570100  | -2.880533 |
| O  | 6.909320  | 7.049611  | 2.024856  |
| O  | 6.766610  | 5.842691  | -2.910057 |
| O  | 8.110935  | 3.051084  | -2.353369 |
| Ti | 8.069265  | 4.938658  | -1.899421 |
| O  | 7.943138  | 5.289967  | -0.092773 |
| O  | 8.402446  | 3.396121  | 1.572049  |
| Ti | 8.160756  | 5.540905  | 1.897432  |
| O  | 9.836631  | 6.634637  | 1.818970  |
| O  | 11.119835 | 3.963176  | 1.930132  |
| O  | 10.172061 | 3.395354  | -0.780304 |
| O  | 9.738123  | 5.515709  | -2.695930 |
| O  | 11.591473 | 6.162802  | -0.493296 |
| Ti | 11.093473 | 4.811712  | -1.668512 |
| O  | 12.709044 | 4.016778  | -2.197566 |
| Ti | 11.411770 | 5.896652  | 1.333998  |
| O  | 13.134424 | 5.587994  | 1.966368  |
| Ti | 13.307035 | 3.613417  | 1.851470  |
| Ti | 13.486272 | 2.806993  | -0.980309 |
| O  | 13.933406 | 1.851001  | 2.542360  |
| Ti | 12.660526 | 0.361265  | 1.965451  |
| O  | 12.689938 | -0.146050 | 0.090280  |
| O  | 14.027249 | 1.284668  | -1.893235 |
| Ti | 12.598864 | -0.024592 | -1.762656 |
| O  | 12.185832 | 2.380903  | 0.453972  |
| O  | 10.999745 | 1.060588  | 2.595175  |
| Ti | 10.024702 | 2.257151  | 1.139632  |
| O  | 14.504800 | 3.674483  | 0.308860  |
| O  | 9.693703  | 0.817766  | -0.215614 |
| O  | 11.265887 | 1.081635  | -2.599051 |
| Ti | 9.633557  | 1.605038  | -1.871601 |
| O  | 0.305514  | -1.254314 | 1.818566  |
| O  | 0.346580  | -1.232190 | -2.694215 |
| Ti | 1.654221  | 0.269654  | 1.480212  |
| O  | 1.624359  | 0.284818  | -0.421780 |
| Ti | 1.614689  | 0.221026  | -2.283184 |

|    |           |           |           |
|----|-----------|-----------|-----------|
| O  | -3.695832 | -8.023674 | 1.929652  |
| O  | -0.694986 | -7.268651 | -2.843686 |
| O  | -0.728900 | -8.190480 | 1.650686  |
| O  | -1.823572 | -4.662650 | 1.760713  |
| Ti | -2.006955 | -6.734302 | 1.758011  |
| O  | -2.122154 | -6.548344 | -0.196552 |
| O  | -1.713497 | -4.528090 | -2.599221 |
| Ti | -2.216747 | -6.346064 | -2.049340 |
| O  | -3.655435 | -7.345556 | -2.899152 |
| O  | 1.056910  | -4.248468 | 1.933099  |
| Ti | -0.416581 | -3.159206 | 1.464892  |
| O  | -0.273685 | -3.133024 | -0.435574 |
| O  | 1.216113  | -3.925406 | -3.034126 |
| Ti | -0.305631 | -3.084494 | -2.303751 |
| O  | 3.144289  | -0.658031 | -2.949402 |
| Ti | 4.657023  | -1.552947 | -2.312684 |
| O  | 4.705831  | -1.580550 | -0.453301 |
| O  | 3.196273  | -0.727026 | 1.816746  |
| Ti | 4.848541  | -1.542313 | 1.456037  |
| O  | 6.754508  | -2.701713 | 1.856552  |
| O  | 6.546053  | -2.653202 | -2.798039 |
| O  | 5.944097  | -0.102327 | -2.705518 |
| O  | 6.136925  | 0.045268  | 1.756227  |
| O  | 12.606238 | -1.594593 | 2.266277  |
| Ti | 11.283829 | -2.981465 | 1.733612  |
| O  | 11.474195 | -3.212944 | -0.154126 |
| O  | 12.401878 | -1.734100 | -2.478520 |
| Ti | 11.045129 | -3.005339 | -1.954142 |
| O  | 10.864502 | -4.893208 | 2.081538  |
| O  | 9.688889  | -2.014617 | 1.763380  |
| Ti | 8.035400  | -1.112466 | 1.480755  |
| O  | 7.655437  | -1.245408 | -0.378533 |
| O  | 9.499355  | -2.074221 | -2.432691 |
| Ti | 7.786306  | -1.275643 | -2.223178 |
| Ti | 2.752099  | -4.568093 | -2.170156 |
| O  | 2.824354  | -4.284341 | -0.338864 |
| Ti | 2.763678  | -4.890642 | 1.460645  |
| Ti | 0.956883  | -7.899249 | -2.320109 |
| O  | 1.965156  | -6.814750 | 1.513352  |
| O  | 2.394044  | -9.500863 | 1.803414  |
| O  | 0.694669  | -8.910044 | -0.765388 |
| Ti | 0.974576  | -8.449799 | 1.023991  |
| O  | 1.969275  | -6.370513 | -1.869741 |
| Ti | 7.248815  | -8.890241 | 1.284056  |
| O  | 7.570257  | -9.833306 | -0.318393 |
| Ti | 7.200940  | -8.328882 | -1.470298 |
| O  | 6.872360  | -7.320778 | 0.123743  |
| O  | 5.644460  | -8.425947 | -2.473325 |
| O  | 5.419244  | -9.188119 | 1.812357  |
| O  | 4.634438  | -6.172729 | 1.813893  |
| Ti | 3.951928  | -8.073792 | 1.542470  |
| O  | 3.690193  | -7.963924 | -0.349343 |

|    |            |           |           |
|----|------------|-----------|-----------|
| O  | 4.500995   | -5.858651 | -2.667284 |
| Ti | 3.895383   | -7.663641 | -2.194647 |
| O  | 2.521653   | -8.599493 | -3.167362 |
| O  | 4.143188   | -3.381111 | -2.911261 |
| O  | 4.201011   | -3.477900 | 1.876384  |
| Ti | 9.424082   | -6.167998 | 1.624430  |
| O  | 9.844524   | -6.220918 | -0.223657 |
| O  | 10.630270  | -4.747395 | -2.596600 |
| Ti | 9.291341   | -5.947136 | -1.982100 |
| O  | 8.727208   | -7.738565 | -2.382145 |
| O  | 8.936133   | -8.114165 | 1.961343  |
| O  | 7.861247   | -5.187351 | 1.748655  |
| Ti | 6.034689   | -4.688868 | 1.526853  |
| O  | 5.784414   | -4.461635 | -0.361920 |
| O  | 7.645260   | -5.172526 | -2.462244 |
| Ti | 5.899980   | -4.466750 | -2.200011 |
| Ti | -9.038580  | 5.804332  | -1.781642 |
| O  | -9.155791  | 5.808404  | 0.114676  |
| O  | -10.806508 | 5.095010  | 2.213922  |
| Ti | -9.155355  | 6.108643  | 1.984665  |
| O  | -8.450328  | 7.928053  | 2.496333  |
| O  | -8.585726  | 7.660805  | -1.882568 |
| O  | -7.455611  | 5.214811  | -2.572997 |
| Ti | -5.762136  | 4.459744  | -2.128127 |
| O  | -5.792423  | 4.519879  | -0.294284 |
| O  | -7.642755  | 5.132632  | 2.649344  |
| Ti | -5.862000  | 5.036525  | 1.579455  |
| O  | -4.108127  | 3.760597  | 1.906875  |
| O  | -4.014952  | 3.384010  | -2.800235 |
| Ti | -6.982793  | 8.058398  | -1.002604 |
| O  | -7.255183  | 9.414700  | 0.265422  |
| Ti | -6.682142  | 8.456405  | 1.815935  |
| O  | -6.487425  | 6.860117  | 0.560955  |
| O  | -5.064539  | 9.412742  | 2.067383  |
| O  | -5.531238  | 8.286628  | -2.096596 |
| O  | -4.331477  | 5.874568  | -2.485880 |
| Ti | -3.703452  | 7.656067  | -1.864237 |
| O  | -3.493149  | 7.945687  | -0.053611 |
| O  | -4.350656  | 6.423584  | 1.957732  |
| Ti | -3.440334  | 8.502791  | 1.842171  |
| O  | -1.886593  | 9.684241  | 1.781845  |
| O  | -1.641141  | 6.966746  | 1.771173  |
| O  | -1.791014  | 6.393185  | -1.760796 |
| O  | -2.415754  | 8.717637  | -2.846064 |
| O  | -0.301699  | 8.823695  | -0.641824 |
| Ti | -0.806686  | 7.936056  | -2.205154 |
| Ti | -0.564119  | 8.519728  | 1.182338  |
| Ti | -2.665959  | 5.135943  | 1.534327  |
| O  | -2.685424  | 4.388571  | -0.221109 |
| Ti | -2.639121  | 4.592471  | -2.063773 |
| O  | -10.491709 | 4.828194  | -2.445708 |
| O  | -1.096127  | 3.980740  | -2.950799 |

|    |            |           |           |
|----|------------|-----------|-----------|
| Ti | 0.440435   | 3.157416  | -2.254488 |
| O  | 0.476547   | 3.281842  | -0.394134 |
| O  | -0.954878  | 4.455596  | 2.001185  |
| Ti | 0.502368   | 3.404292  | 1.526529  |
| O  | 1.050267   | 8.218618  | 2.018192  |
| O  | 0.763365   | 7.317250  | -2.965910 |
| O  | 1.859338   | 4.580944  | -2.631577 |
| Ti | 2.249380   | 6.434354  | -2.115245 |
| O  | 2.167619   | 6.657678  | -0.278562 |
| O  | 1.941906   | 4.880721  | 1.744572  |
| Ti | 2.472919   | 6.983548  | 1.658380  |
| O  | 3.951221   | 8.272292  | 1.517040  |
| O  | 3.694943   | 7.433768  | -2.980052 |
| Ti | -10.992041 | 3.026818  | -1.979153 |
| O  | -11.489971 | 3.318066  | -0.200972 |
| O  | -12.680620 | 1.889990  | 2.042256  |
| Ti | -11.276057 | 3.237902  | 1.689135  |
| O  | -9.417608  | 2.147579  | -2.452459 |
| Ti | -7.750670  | 1.252385  | -2.195865 |
| O  | -7.770094  | 1.238591  | -0.335286 |
| O  | -9.628337  | 2.386848  | 1.734165  |
| Ti | -7.955664  | 1.507639  | 1.549811  |
| O  | -6.092056  | 0.301898  | 1.808624  |
| O  | -5.928247  | 0.197910  | -2.897318 |
| O  | -6.485524  | 2.680537  | -2.677907 |
| O  | -6.655279  | 3.036953  | 1.821289  |
| Ti | -4.753507  | 1.848642  | 1.458623  |
| O  | -4.706623  | 1.639739  | -0.443977 |
| Ti | -4.625555  | 1.540832  | -2.302511 |
| Ti | -13.627562 | -3.030973 | -1.492182 |
| Ti | -14.181037 | -3.393161 | 1.255816  |
| O  | -13.705540 | -1.406257 | -2.405320 |
| Ti | -12.666422 | 0.100395  | -1.805068 |
| O  | -13.559589 | 0.440678  | -0.204370 |
| O  | -14.365266 | -1.528737 | 1.908299  |
| Ti | -13.075596 | 0.007680  | 1.567795  |
| O  | -12.615993 | -2.896403 | 0.110077  |
| O  | -12.329752 | 1.797284  | -2.569623 |
| O  | -10.977344 | -0.699326 | -1.765455 |
| Ti | -9.398464  | -1.761845 | -1.710262 |
| O  | -15.127152 | -3.510175 | -0.390513 |
| O  | -8.751588  | -1.720874 | 0.037432  |
| O  | -11.385471 | -0.773212 | 1.496275  |
| Ti | -9.943190  | -1.988941 | 1.666581  |
| Ti | -11.257072 | -5.100094 | -1.799851 |
| O  | -12.910726 | -4.448584 | -2.496678 |
| O  | -10.838982 | -3.720785 | 1.921285  |
| O  | -9.887279  | -6.369531 | 1.898869  |
| O  | -11.642449 | -6.018110 | -0.240769 |
| Ti | -11.632560 | -5.419574 | 1.558849  |
| O  | -13.509412 | -5.107564 | 1.771891  |
| O  | -10.289482 | -3.494133 | -1.588222 |

|    |           |           |           |
|----|-----------|-----------|-----------|
| O  | -6.818299 | -5.931711 | -2.743998 |
| O  | -6.951556 | -6.843576 | 1.812220  |
| O  | -8.081132 | -3.231909 | 1.878365  |
| Ti | -8.108798 | -5.298318 | 1.818255  |
| O  | -8.138254 | -5.058907 | -0.121666 |
| O  | -7.811449 | -3.112004 | -2.537240 |
| Ti | -8.253005 | -4.919919 | -1.970469 |
| O  | -9.800544 | -5.892826 | -2.651597 |
| O  | -8.289337 | -0.586093 | -2.813053 |
| O  | -8.656015 | -0.373639 | 2.068363  |
| O  | -5.346296 | -2.654699 | 1.802399  |
| Ti | -6.859287 | -1.566856 | 1.313348  |
| O  | -6.216375 | -1.520531 | -0.543078 |
| O  | -4.922156 | -2.601826 | -3.074127 |
| Ti | -6.386909 | -1.663705 | -2.365902 |
| O  | -3.058713 | 0.692258  | -2.894323 |
| Ti | -1.499622 | -0.147480 | -2.267699 |
| O  | -1.488098 | -0.155132 | -0.404306 |
| O  | -3.154963 | 0.913745  | 1.797834  |
| Ti | -1.589068 | -0.050797 | 1.496847  |
| O  | -0.213835 | 1.321316  | -2.666503 |
| O  | -0.216907 | 1.473183  | 1.806271  |
| Ti | -3.410443 | -3.223522 | -2.128111 |
| O  | -3.338845 | -2.835492 | -0.328467 |
| Ti | -3.694301 | -3.435944 | 1.456797  |
| Ti | -5.178558 | -6.562178 | -2.123165 |
| O  | -4.395431 | -5.349543 | 1.570760  |
| O  | -5.459822 | -7.550559 | -0.560659 |
| Ti | -5.203052 | -7.047609 | 1.218433  |
| O  | -4.168827 | -5.032545 | -1.719856 |
| O  | -2.049607 | -1.987893 | -2.878392 |
| O  | -2.234918 | -1.983403 | 1.910883  |
| O  | 1.498687  | 0.594650  | 8.202368  |
| O  | 1.318088  | 0.476157  | 3.762877  |
| O  | 3.575772  | 4.027050  | 8.201285  |
| O  | 3.530692  | 3.774330  | 3.782720  |
| O  | 4.995262  | 5.509091  | 5.614126  |
| Ti | 4.834453  | 5.235527  | 3.746172  |
| Ti | 4.709511  | 5.462616  | 7.465490  |
| Ti | 2.834725  | 2.125803  | 7.924817  |
| O  | 2.741869  | 1.966430  | 6.053380  |
| Ti | 2.701464  | 1.905227  | 4.159502  |
| O  | 4.298333  | 1.056344  | 3.697752  |
| Ti | 5.910920  | 0.155565  | 4.102799  |
| O  | 5.753577  | 0.213509  | 5.992106  |
| O  | 4.598677  | 1.562424  | 8.454051  |
| Ti | 5.860765  | 0.198625  | 7.846155  |
| O  | 7.764311  | -0.918439 | 8.132369  |
| O  | 7.775120  | -0.954089 | 3.684312  |
| O  | 6.416627  | 5.242931  | 8.205572  |
| O  | 6.729436  | 4.893887  | 3.445885  |
| O  | 7.074209  | 1.861113  | 3.766759  |

|    |           |           |          |
|----|-----------|-----------|----------|
| Ti | 7.913138  | 3.522358  | 4.356688 |
| O  | 7.786058  | 3.740242  | 6.164961 |
| O  | 7.196041  | 1.893710  | 8.154861 |
| Ti | 7.855437  | 4.016286  | 8.117596 |
| O  | 9.488188  | 5.125417  | 8.278655 |
| O  | 9.903850  | 2.503017  | 8.078444 |
| O  | 9.801343  | 2.449845  | 4.342074 |
| O  | 9.291677  | 4.926545  | 3.621365 |
| O  | 11.114662 | 4.813320  | 5.833247 |
| Ti | 10.908225 | 3.973519  | 4.165913 |
| O  | 12.873111 | 3.605870  | 3.934799 |
| Ti | 10.868225 | 4.140625  | 7.550579 |
| O  | 12.623846 | 3.665467  | 8.119407 |
| Ti | 13.068251 | 1.950832  | 7.487962 |
| Ti | 13.413124 | 1.807789  | 4.687119 |
| O  | 13.150934 | 0.426784  | 8.607661 |
| Ti | 12.144373 | -1.317969 | 7.929034 |
| O  | 12.914301 | -1.629227 | 6.253922 |
| O  | 13.403216 | -0.013011 | 4.059900 |
| Ti | 12.246412 | -1.618332 | 4.467244 |
| O  | 11.917026 | 1.753329  | 5.951262 |
| O  | 10.538395 | -0.431715 | 7.883987 |
| Ti | 8.972372  | 0.721478  | 7.635529 |
| O  | 14.513616 | 2.007591  | 6.214428 |
| O  | 8.667680  | 0.692605  | 5.839974 |
| O  | 10.532341 | -0.944520 | 4.508320 |
| Ti | 9.309840  | 0.449080  | 4.003668 |
| O  | -0.645539 | -2.850570 | 8.169228 |
| O  | -0.700898 | -3.017531 | 3.796026 |
| Ti | 0.713628  | -1.329774 | 7.822536 |
| O  | 0.500660  | -1.154307 | 5.965188 |
| Ti | 0.617685  | -1.453765 | 4.105549 |
| O  | -5.067178 | -9.507867 | 8.382837 |
| O  | -2.126192 | -9.589163 | 3.774064 |
| O  | -2.155985 | -9.356468 | 8.182655 |
| O  | -2.790358 | -6.287083 | 8.114384 |
| Ti | -3.572001 | -8.168150 | 7.773083 |
| O  | -3.591715 | -8.141183 | 5.924402 |
| O  | -2.925245 | -6.405494 | 3.707055 |
| Ti | -3.680619 | -8.504142 | 4.001200 |
| O  | -5.253784 | -9.683955 | 3.879464 |
| O  | 0.243125  | -5.668481 | 8.151723 |
| Ti | -1.355467 | -4.774416 | 7.843727 |
| O  | -1.457630 | -4.878758 | 5.927498 |
| O  | -0.285280 | -6.141912 | 3.317614 |
| Ti | -1.555452 | -4.843435 | 4.085915 |
| O  | 2.197087  | -2.439076 | 3.917609 |
| Ti | 3.873325  | -3.283290 | 4.116894 |
| O  | 4.050338  | -3.416357 | 5.966771 |
| O  | 2.293898  | -2.297308 | 8.012730 |
| Ti | 3.917449  | -3.250779 | 7.851099 |
| O  | 5.826296  | -4.479269 | 8.153318 |



|    |            |            |          |
|----|------------|------------|----------|
| O  | 5.755746   | -4.509264  | 3.748825 |
| O  | 5.184447   | -1.743016  | 3.729303 |
| O  | 5.169083   | -1.667766  | 8.158902 |
| O  | 11.690536  | -3.215866  | 8.264114 |
| Ti | 10.425349  | -4.666677  | 7.745476 |
| O  | 10.996754  | -5.001873  | 5.989071 |
| O  | 11.891215  | -3.433588  | 3.847526 |
| Ti | 10.409337  | -4.719513  | 4.229311 |
| O  | 10.000518  | -6.573181  | 8.102395 |
| O  | 8.808785   | -3.746960  | 7.742197 |
| Ti | 7.088219   | -2.911313  | 7.723725 |
| O  | 6.801186   | -2.666042  | 5.896462 |
| O  | 8.808565   | -3.760549  | 4.169775 |
| Ti | 7.095084   | -2.935292  | 4.054629 |
| Ti | 1.535465   | -6.584610  | 3.926384 |
| O  | 1.652032   | -6.282833  | 5.782151 |
| Ti | 1.870511   | -6.511596  | 7.648048 |
| Ti | -0.378443  | -9.947637  | 4.322168 |
| O  | 0.936883   | -8.368317  | 7.949804 |
| O  | 1.280737   | -11.038325 | 8.137868 |
| O  | -0.598522  | -10.403752 | 6.121480 |
| Ti | -0.361469  | -9.829167  | 7.885803 |
| O  | 0.823175   | -8.434898  | 4.126431 |
| Ti | 6.202959   | -10.365714 | 7.283582 |
| O  | 6.501303   | -11.518525 | 5.827384 |
| Ti | 5.940738   | -10.234668 | 4.484230 |
| O  | 5.689973   | -9.034897  | 5.980205 |
| O  | 4.278778   | -10.758827 | 3.862449 |
| O  | 4.403552   | -10.770475 | 8.109688 |
| O  | 3.577786   | -7.885458  | 8.095523 |
| Ti | 2.770502   | -9.710824  | 7.644899 |
| O  | 2.623444   | -9.649100  | 5.830753 |
| O  | 3.446347   | -7.830199  | 3.627688 |
| Ti | 2.551374   | -9.893237  | 3.869598 |
| O  | 0.991143   | -11.050004 | 3.650540 |
| O  | 3.058532   | -5.192296  | 3.668078 |
| O  | 3.265300   | -5.163950  | 8.207899 |
| Ti | 8.598841   | -7.792461  | 7.494393 |
| O  | 8.975686   | -8.320720  | 5.705027 |
| O  | 9.722960   | -6.516655  | 3.757667 |
| Ti | 8.325376   | -7.900626  | 4.016600 |
| O  | 7.410889   | -9.668553  | 3.366434 |
| O  | 7.924562   | -9.646545  | 7.885657 |
| O  | 7.099089   | -6.740788  | 7.484463 |
| Ti | 5.184454   | -6.482308  | 7.893204 |
| O  | 4.642597   | -6.349471  | 6.024451 |
| O  | 6.651186   | -7.068541  | 3.878735 |
| Ti | 4.851687   | -6.389279  | 4.205997 |
| Ti | -10.492935 | 4.706188   | 4.439051 |
| O  | -10.871361 | 5.232632   | 6.228094 |
| O  | -11.619448 | 3.430384   | 8.177617 |
| Ti | -10.221765 | 4.813567   | 7.917655 |

|    |            |           |          |
|----|------------|-----------|----------|
| O  | -9.309696  | 6.581695  | 8.566440 |
| O  | -9.821313  | 6.559876  | 4.043465 |
| O  | -8.994093  | 3.652578  | 4.448352 |
| Ti | -7.080104  | 3.395283  | 4.038485 |
| O  | -6.537640  | 3.264634  | 5.906808 |
| O  | -8.548138  | 3.980116  | 8.053174 |
| Ti | -6.749857  | 3.299002  | 7.725775 |
| O  | -4.954612  | 2.107731  | 8.261629 |
| O  | -5.158900  | 2.075411  | 3.721310 |
| Ti | -8.100408  | 7.281552  | 4.645132 |
| O  | -8.404835  | 8.435840  | 6.098817 |
| Ti | -7.846757  | 7.152289  | 7.443923 |
| O  | -7.592956  | 5.950973  | 5.949771 |
| O  | -6.187886  | 7.678987  | 8.069926 |
| O  | -6.298980  | 7.686165  | 3.820117 |
| O  | -5.473771  | 4.797747  | 3.835581 |
| Ti | -4.667259  | 6.624420  | 4.287323 |
| O  | -4.537223  | 6.564952  | 6.100294 |
| O  | -5.348836  | 4.744542  | 8.305782 |
| Ti | -4.465915  | 6.805281  | 8.064439 |
| O  | -2.914650  | 7.974851  | 8.279377 |
| O  | -2.731400  | 5.356734  | 7.766777 |
| O  | -2.835437  | 5.278005  | 3.988988 |
| O  | -3.173187  | 7.945334  | 3.793825 |
| O  | -1.303997  | 7.333755  | 5.808766 |
| Ti | -1.530519  | 6.732211  | 4.052611 |
| Ti | -1.543640  | 6.880616  | 7.606887 |
| Ti | -3.436273  | 3.508652  | 8.004350 |
| O  | -3.550838  | 3.183754  | 6.150056 |
| Ti | -3.769876  | 3.423943  | 4.288842 |
| O  | -11.894000 | 3.485695  | 3.830034 |
| O  | -2.144538  | 2.579226  | 3.777164 |
| Ti | -0.551333  | 1.679618  | 4.086890 |
| O  | -0.432443  | 1.771947  | 6.000178 |
| O  | -1.619428  | 3.057743  | 8.612358 |
| Ti | -0.345026  | 1.751510  | 7.845077 |
| O  | 0.213259   | 6.557669  | 8.157661 |
| O  | 0.266300   | 6.236959  | 3.793155 |
| O  | 0.882456   | 3.194102  | 3.819221 |
| Ti | 1.692635   | 5.061246  | 4.188541 |
| O  | 1.749425   | 5.018440  | 6.041473 |
| O  | 1.001025   | 3.329325  | 8.188761 |
| Ti | 1.741650   | 5.449947  | 7.954969 |
| O  | 3.333018   | 6.623701  | 7.948458 |
| O  | 3.192682   | 6.383079  | 3.552438 |
| Ti | -12.316248 | 1.579208  | 4.190412 |
| O  | -12.890783 | 1.914317  | 5.945261 |
| O  | -13.778313 | 0.340796  | 8.084521 |
| Ti | -12.300066 | 1.631404  | 7.704667 |
| O  | -10.696248 | 0.662052  | 4.197582 |
| Ti | -8.978597  | -0.173092 | 4.213470 |
| O  | -8.686924  | -0.439817 | 6.036757 |

|    |            |           |          |
|----|------------|-----------|----------|
| O  | -10.695879 | 0.677600  | 7.757040 |
| Ti | -8.986127  | -0.155281 | 7.876845 |
| O  | -7.071171  | -1.349209 | 8.198943 |
| O  | -7.048807  | -1.426508 | 3.764717 |
| O  | -7.717980  | 1.391864  | 3.782354 |
| O  | -7.650282  | 1.420317  | 8.181961 |
| Ti | -5.762856  | 0.195912  | 7.813752 |
| O  | -5.947662  | 0.331477  | 5.963413 |
| Ti | -5.805576  | 0.164246  | 4.081200 |
| Ti | -14.961736 | -5.042410 | 4.453662 |
| Ti | -15.296572 | -4.905009 | 7.253842 |
| O  | -15.030559 | -3.527806 | 3.324082 |
| Ti | -14.024135 | -1.780393 | 4.008071 |
| O  | -14.795806 | -1.469462 | 5.681173 |
| O  | -15.288608 | -3.081388 | 7.873869 |
| Ti | -14.126626 | -1.477193 | 7.468789 |
| O  | -13.803240 | -4.849750 | 5.980882 |
| O  | -13.569815 | 0.117616  | 3.670758 |
| O  | -12.418034 | -2.664659 | 4.060308 |
| Ti | -10.848083 | -3.813090 | 4.309152 |
| O  | -16.402481 | -5.102508 | 5.727914 |
| O  | -10.536971 | -3.774694 | 6.100881 |
| O  | -12.415536 | -2.155817 | 7.432730 |
| Ti | -11.190494 | -3.550587 | 7.939498 |
| Ti | -12.760608 | -7.235039 | 4.388150 |
| O  | -14.512271 | -6.753730 | 3.815405 |
| O  | -11.691111 | -5.544961 | 7.583926 |
| O  | -11.164418 | -8.020371 | 8.310647 |
| O  | -12.997689 | -7.913533 | 6.101593 |
| Ti | -12.787813 | -7.070152 | 7.771470 |
| O  | -14.754010 | -6.702698 | 7.999790 |
| O  | -11.772097 | -5.602047 | 3.864851 |
| O  | -8.335771  | -8.336147 | 3.716854 |
| O  | -8.580374  | -7.950771 | 8.497727 |
| O  | -8.999539  | -4.922987 | 8.173225 |
| Ti | -9.790083  | -6.612758 | 7.590055 |
| O  | -9.658282  | -6.828777 | 5.781579 |
| O  | -9.066390  | -4.978296 | 3.801866 |
| Ti | -9.743817  | -7.095432 | 3.830033 |
| O  | -11.381023 | -8.197875 | 3.634586 |
| O  | -9.644948  | -2.169731 | 3.812276 |
| O  | -9.662264  | -2.131891 | 8.251113 |
| O  | -6.227100  | -4.202680 | 8.250579 |
| Ti | -7.798520  | -3.243522 | 7.827616 |
| O  | -7.592978  | -3.310658 | 5.933822 |
| O  | -6.505241  | -4.671907 | 3.391495 |
| Ti | -7.748442  | -3.282362 | 4.088989 |
| O  | -4.186619  | -0.795126 | 3.918938 |
| Ti | -2.610218  | -1.769200 | 4.107887 |
| O  | -2.379175  | -1.933081 | 5.963874 |
| O  | -4.089331  | -0.651135 | 8.007030 |
| Ti | -2.514757  | -1.647331 | 7.825685 |

|    |           |           |           |
|----|-----------|-----------|-----------|
| O  | -1.250839 | -0.246642 | 3.757859  |
| O  | -1.194499 | -0.078654 | 8.133289  |
| Ti | -4.750817 | -5.209900 | 4.032718  |
| O  | -4.595926 | -4.884605 | 5.888870  |
| Ti | -4.610277 | -5.011193 | 7.768968  |
| Ti | -6.629410 | -8.572486 | 4.470256  |
| O  | -5.445510 | -6.899539 | 8.097906  |
| O  | -6.947459 | -8.815601 | 6.319207  |
| Ti | -6.713677 | -8.395669 | 8.127821  |
| O  | -5.495688 | -7.051018 | 4.183497  |
| O  | -3.386896 | -3.689223 | 3.707253  |
| O  | -3.215924 | -3.572134 | 8.183563  |
| O  | 0.167663  | -1.101530 | 14.802531 |
| O  | 0.338059  | -1.113446 | 10.015794 |
| O  | 2.253583  | 1.955670  | 13.614702 |
| O  | 2.500202  | 2.231147  | 10.329005 |
| O  | 3.527976  | 4.468062  | 12.334493 |
| Ti | 3.325934  | 3.941781  | 10.539170 |
| Ti | 3.271963  | 3.515273  | 13.910239 |
| Ti | 1.527195  | 0.145739  | 14.056769 |
| O  | 1.450463  | -0.269976 | 12.260465 |
| Ti | 1.796925  | 0.326402  | 10.475574 |
| O  | 3.448630  | -0.455812 | 10.128097 |
| Ti | 4.970443  | -1.525064 | 10.623917 |
| O  | 4.342255  | -1.556505 | 12.480809 |
| O  | 3.042155  | -0.466546 | 15.004581 |
| Ti | 4.506626  | -1.412812 | 14.305169 |
| O  | 6.401665  | -2.502436 | 14.752915 |
| O  | 6.764644  | -2.716486 | 9.875869  |
| O  | 4.916003  | 2.891675  | 14.558356 |
| O  | 5.177096  | 3.665653  | 10.221750 |
| O  | 6.179887  | 0.133987  | 10.052432 |
| Ti | 6.325476  | 2.185309  | 10.159493 |
| O  | 6.408704  | 1.909315  | 12.085772 |
| O  | 5.934869  | 0.034345  | 14.484294 |
| Ti | 6.384165  | 1.840926  | 13.936366 |
| O  | 7.938442  | 2.775639  | 14.641104 |
| O  | 8.492783  | 0.347336  | 13.630281 |
| O  | 8.942723  | 0.631494  | 10.033625 |
| O  | 8.083000  | 3.309993  | 10.036908 |
| O  | 9.777405  | 2.894757  | 12.210458 |
| Ti | 9.784067  | 2.308285  | 10.408194 |
| O  | 11.653801 | 2.007578  | 10.156084 |
| Ti | 9.402598  | 1.989434  | 13.783016 |
| O  | 11.084356 | 1.366276  | 14.444584 |
| Ti | 11.760801 | -0.061991 | 13.431414 |
| Ti | 12.318990 | 0.288502  | 10.681573 |
| O  | 11.820755 | -1.691500 | 14.335769 |
| Ti | 10.785160 | -3.202843 | 13.737942 |
| O  | 11.681377 | -3.537189 | 12.137264 |
| O  | 12.491248 | -1.574331 | 10.028423 |
| Ti | 11.194019 | -3.104540 | 10.367617 |

|    |           |            |           |
|----|-----------|------------|-----------|
| O  | 10.746076 | -0.173953  | 11.821785 |
| O  | 9.092738  | -2.426398  | 13.681039 |
| Ti | 7.525943  | -1.332818  | 13.657311 |
| O  | 13.266893 | 0.394751   | 12.324338 |
| O  | 6.880988  | -1.353088  | 11.908426 |
| O  | 9.507075  | -2.315129  | 10.430036 |
| Ti | 8.057173  | -1.108905  | 10.273743 |
| O  | -1.676129 | -4.408949  | 14.602439 |
| O  | -1.680289 | -4.569392  | 10.129455 |
| Ti | -0.388507 | -2.940498  | 14.200143 |
| O  | -0.404901 | -2.942390  | 12.335801 |
| Ti | -0.310499 | -3.045984  | 10.435858 |
| O  | -5.586280 | -10.529765 | 14.906688 |
| O  | -2.938517 | -11.332936 | 9.933530  |
| O  | -2.652484 | -10.405452 | 14.901330 |
| O  | -3.746328 | -7.671397  | 14.571439 |
| Ti | -4.139394 | -9.523122  | 14.050899 |
| O  | -4.050617 | -9.745251  | 12.213830 |
| O  | -3.836897 | -7.976498  | 10.174472 |
| Ti | -4.355076 | -10.087684 | 10.282343 |
| O  | -5.836500 | -11.372228 | 10.428880 |
| O  | -0.790697 | -7.068393  | 14.888346 |
| Ti | -2.329127 | -6.246370  | 14.194827 |
| O  | -2.365695 | -6.376761  | 12.333034 |
| O  | -0.940716 | -7.541790  | 9.935017  |
| Ti | -2.401525 | -6.496655  | 10.415831 |
| O  | 1.259297  | -4.003970  | 10.129423 |
| Ti | 2.858994  | -4.936345  | 10.469976 |
| O  | 2.813079  | -4.727739  | 12.372481 |
| O  | 1.168388  | -3.782539  | 14.828840 |
| Ti | 2.736033  | -4.625216  | 14.231382 |
| O  | 4.595113  | -5.764210  | 14.609737 |
| O  | 4.760828  | -6.125997  | 10.111169 |
| O  | 4.200053  | -3.391604  | 10.124116 |
| O  | 4.036745  | -3.277041  | 14.819425 |
| O  | 10.453693 | -4.900726  | 14.507260 |
| Ti | 9.105489  | -6.115962  | 13.913930 |
| O  | 9.596749  | -6.406903  | 12.134331 |
| O  | 10.792744 | -4.983652  | 9.893111  |
| Ti | 9.383411  | -6.326307  | 10.244679 |
| O  | 8.603852  | -7.916586  | 14.378350 |
| O  | 7.529760  | -5.235814  | 14.385260 |
| Ti | 5.862428  | -4.338401  | 14.128316 |
| O  | 5.878803  | -4.324215  | 12.268391 |
| O  | 7.736164  | -5.474858  | 10.197753 |
| Ti | 6.061736  | -4.599948  | 10.383575 |
| Ti | 0.769834  | -8.226509  | 10.398707 |
| O  | 0.793834  | -7.478067  | 12.155344 |
| Ti | 0.749915  | -7.679554  | 13.997749 |
| Ti | -1.318236 | -11.619864 | 10.759902 |
| O  | -0.097228 | -9.481596  | 13.695780 |
| O  | 0.530178  | -11.802775 | 14.785367 |

|    |            |            |           |
|----|------------|------------|-----------|
| O  | -1.579505  | -11.921457 | 12.584628 |
| Ti | -1.080561  | -11.024795 | 14.144168 |
| O  | -0.245414  | -10.062363 | 10.171523 |
| Ti | 5.093362   | -11.146325 | 12.933855 |
| O  | 5.365039   | -12.503063 | 11.666058 |
| Ti | 4.793213   | -11.544825 | 10.115562 |
| O  | 4.596503   | -9.948752  | 11.369390 |
| O  | 3.177415   | -12.502153 | 9.861153  |
| O  | 3.643570   | -11.375022 | 14.029517 |
| O  | 2.443733   | -8.961129  | 14.418173 |
| Ti | 1.814736   | -10.743204 | 13.798640 |
| O  | 1.607966   | -11.038633 | 11.988707 |
| O  | 2.457204   | -9.513238  | 9.973299  |
| Ti | 1.553057   | -11.594181 | 10.092532 |
| O  | 0.004801   | -12.781483 | 10.155200 |
| O  | 2.212750   | -6.850044  | 10.023812 |
| O  | 2.126226   | -6.470585  | 14.730005 |
| Ti | 7.149638   | -8.891493  | 13.713112 |
| O  | 7.264081   | -8.898430  | 11.815914 |
| O  | 8.911282   | -8.182315  | 9.717351  |
| Ti | 7.260765   | -9.194964  | 9.945639  |
| O  | 6.558652   | -11.015602 | 9.432126  |
| O  | 6.695997   | -10.747931 | 13.814231 |
| O  | 5.567385   | -8.298727  | 14.502512 |
| Ti | 3.872766   | -7.544853  | 14.059381 |
| O  | 3.900815   | -7.608997  | 12.225595 |
| O  | 5.748694   | -8.220297  | 9.281372  |
| Ti | 3.967269   | -8.125722  | 10.351997 |
| Ti | -11.318644 | 3.080152   | 10.311017 |
| O  | -11.735414 | 3.134169   | 12.158642 |
| O  | -12.520130 | 1.655952   | 14.528893 |
| Ti | -11.179322 | 2.856495   | 13.917070 |
| O  | -10.610468 | 4.646296   | 14.318474 |
| O  | -10.829107 | 5.026189   | 9.974627  |
| O  | -9.756734  | 2.099091   | 10.185219 |
| Ti | -7.929194  | 1.602306   | 10.406261 |
| O  | -7.677332  | 1.370873   | 12.293738 |
| O  | -9.533176  | 2.081510   | 14.394089 |
| Ti | -7.786675  | 1.375420   | 14.132538 |
| O  | -6.030843  | 0.290263   | 14.842065 |
| O  | -6.093760  | 0.391368   | 10.050627 |
| Ti | -9.141669  | 5.802890   | 10.651517 |
| O  | -9.459317  | 6.741632   | 12.255615 |
| Ti | -9.085116  | 5.236288   | 13.404951 |
| O  | -8.758821  | 4.230655   | 11.807470 |
| O  | -7.526738  | 5.333209   | 14.403801 |
| O  | -7.314630  | 6.102943   | 10.121730 |
| O  | -6.532519  | 3.085418   | 10.119779 |
| Ti | -5.851477  | 4.983347   | 10.394755 |
| O  | -5.568385  | 4.886012   | 12.284936 |
| O  | -6.387882  | 2.766862   | 14.597476 |
| Ti | -5.776735  | 4.569992   | 14.128848 |

|    |            |           |           |
|----|------------|-----------|-----------|
| O  | -4.406957  | 5.495066  | 15.115197 |
| O  | -3.858300  | 3.279200  | 13.792073 |
| O  | -3.870135  | 3.729685  | 10.417309 |
| O  | -4.295736  | 6.415416  | 10.127672 |
| O  | -2.579291  | 5.819280  | 12.717435 |
| Ti | -2.887290  | 5.368250  | 10.930688 |
| Ti | -2.839128  | 4.796919  | 14.267335 |
| Ti | -4.637601  | 1.475119  | 14.097514 |
| O  | -4.717362  | 1.192059  | 12.265767 |
| Ti | -4.655151  | 1.803052  | 10.468235 |
| O  | -12.760246 | 1.807304  | 9.851554  |
| O  | -2.950762  | 1.158072  | 9.994874  |
| Ti | -1.476280  | 0.069365  | 10.462545 |
| O  | -1.610143  | 0.044718  | 12.362559 |
| O  | -3.101592  | 0.835433  | 14.959837 |
| Ti | -1.575816  | -0.002348 | 14.232495 |
| O  | -1.195699  | 4.164955  | 14.799244 |
| O  | -1.212617  | 5.125408  | 10.245076 |
| O  | -0.062418  | 1.567393  | 10.150788 |
| Ti | 0.072731   | 3.657249  | 10.162046 |
| O  | 0.137261   | 3.428815  | 12.111343 |
| O  | -0.172662  | 1.436619  | 14.540372 |
| Ti | 0.313281   | 3.255186  | 13.956563 |
| O  | 1.762643   | 4.303030  | 14.716256 |
| O  | 1.701990   | 4.946627  | 10.014659 |
| Ti | -13.178196 | -0.104293 | 10.201814 |
| O  | -13.369084 | 0.124424  | 12.089476 |
| O  | -14.289060 | -1.363136 | 14.408763 |
| Ti | -12.936506 | -0.084934 | 13.889279 |
| O  | -11.579540 | -1.061545 | 10.169915 |
| Ti | -9.927253  | -1.965011 | 10.455030 |
| O  | -9.550418  | -1.836768 | 12.315627 |
| O  | -11.390909 | -1.012161 | 14.373567 |
| Ti | -9.678545  | -1.813120 | 14.161332 |
| O  | -7.837373  | -2.983318 | 14.648814 |
| O  | -8.031536  | -3.120060 | 10.178916 |
| O  | -8.643880  | -0.381892 | 10.074642 |
| O  | -8.434854  | -0.434189 | 14.733436 |
| Ti | -6.546468  | -1.537161 | 14.247983 |
| O  | -6.597623  | -1.509337 | 12.387528 |
| Ti | -6.737770  | -1.541977 | 10.478483 |
| Ti | -15.193012 | -6.709829 | 10.084099 |
| Ti | -15.379024 | -5.908158 | 12.916632 |
| O  | -15.819866 | -4.947537 | 9.393615  |
| Ti | -14.550060 | -3.451525 | 9.969643  |
| O  | -14.582381 | -2.954294 | 11.843541 |
| O  | -15.914644 | -4.383888 | 13.829017 |
| Ti | -14.485138 | -3.074772 | 13.698116 |
| O  | -14.074277 | -5.485564 | 11.487546 |
| O  | -14.495495 | -1.495937 | 9.668062  |
| O  | -12.892739 | -4.158748 | 9.339039  |
| Ti | -11.919806 | -5.347941 | 10.804337 |

|    |            |            |           |
|----|------------|------------|-----------|
| O  | -16.396315 | -6.771120  | 11.623084 |
| O  | -11.605751 | -3.911292  | 12.165188 |
| O  | -13.159267 | -4.181393  | 14.549268 |
| Ti | -11.526469 | -4.698284  | 13.819367 |
| Ti | -13.289142 | -8.988885  | 10.603489 |
| O  | -15.013136 | -8.682647  | 9.970238  |
| O  | -12.056305 | -6.492785  | 12.722612 |
| O  | -11.624639 | -8.611856  | 14.631231 |
| O  | -13.474048 | -9.258818  | 12.429203 |
| Ti | -12.981873 | -7.907924  | 13.608116 |
| O  | -14.601287 | -7.118949  | 14.133315 |
| O  | -13.000543 | -7.055130  | 10.000907 |
| O  | -8.789629  | -10.133518 | 9.891407  |
| O  | -8.656763  | -8.932613  | 14.842212 |
| O  | -10.001913 | -6.140606  | 14.302566 |
| Ti | -9.958264  | -8.025006  | 13.834196 |
| O  | -9.823419  | -8.372339  | 12.025349 |
| O  | -10.297389 | -6.479071  | 10.356025 |
| Ti | -10.031805 | -8.622683  | 10.037532 |
| O  | -11.710369 | -9.717464  | 10.118609 |
| O  | -10.536279 | -3.933301  | 9.973494  |
| O  | -10.221653 | -3.654220  | 14.822244 |
| O  | -7.046764  | -5.814948  | 14.895160 |
| Ti | -8.440031  | -4.779423  | 14.192750 |
| O  | -8.526064  | -4.874400  | 12.333973 |
| O  | -7.342198  | -6.290690  | 10.022078 |
| Ti | -8.707557  | -5.070898  | 10.424783 |
| O  | -5.092418  | -2.364751  | 10.108752 |
| Ti | -3.552545  | -3.366767  | 10.448178 |
| O  | -3.518067  | -3.378710  | 12.350588 |
| O  | -5.032160  | -2.430869  | 14.879956 |
| Ti | -3.502081  | -3.309953  | 14.212205 |
| O  | -2.200461  | -1.838134  | 10.113947 |
| O  | -2.234038  | -1.855451  | 14.619665 |
| Ti | -5.560127  | -6.760813  | 10.540946 |
| O  | -5.488707  | -5.971430  | 12.261701 |
| Ti | -5.447278  | -6.405023  | 14.063613 |
| Ti | -7.281477  | -10.346949 | 10.921372 |
| O  | -6.113605  | -8.249380  | 13.620615 |
| O  | -7.664550  | -10.757285 | 12.715440 |
| Ti | -7.097816  | -9.746345  | 14.161209 |
| O  | -6.390209  | -8.664758  | 10.499661 |
| O  | -4.230880  | -5.288436  | 10.046054 |
| O  | -4.110873  | -5.153640  | 14.779500 |
| O  | 2.331895   | 2.188733   | 1.878174  |
| O  | 2.222350   | 2.065354   | -2.845440 |
| O  | 4.503692   | 5.567201   | 1.418391  |
| O  | 4.225262   | 5.157307   | -1.682538 |
| O  | 5.768938   | 7.672478   | -0.789217 |
| Ti | 5.206466   | 6.654062   | -2.231192 |
| Ti | 5.395961   | 7.255676   | 1.005403  |
| Ti | 3.653103   | 3.661145   | 1.376682  |



|    |           |           |           |
|----|-----------|-----------|-----------|
| O  | 3.619871  | 2.863443  | -0.334080 |
| Ti | 3.563074  | 3.314918  | -2.135894 |
| O  | 5.160850  | 2.729468  | -2.971207 |
| Ti | 6.545719  | 1.694021  | -2.248744 |
| O  | 6.611503  | 1.804568  | -0.387657 |
| O  | 5.443588  | 3.234286  | 1.958958  |
| Ti | 6.804332  | 2.002534  | 1.520196  |
| O  | 8.629430  | 0.859543  | 1.981377  |
| O  | 8.326498  | 0.570100  | -2.880533 |
| O  | 6.909320  | 7.049611  | 2.024856  |
| O  | 6.766610  | 5.842691  | -2.910057 |
| O  | 8.110935  | 3.051084  | -2.353369 |
| Ti | 8.069265  | 4.938658  | -1.899421 |
| O  | 7.943138  | 5.289967  | -0.092773 |
| O  | 8.402446  | 3.396121  | 1.572049  |
| Ti | 8.160756  | 5.540905  | 1.897432  |
| O  | 9.836631  | 6.634637  | 1.818970  |
| O  | 11.119835 | 3.963176  | 1.930132  |
| O  | 10.172061 | 3.395354  | -0.780304 |
| O  | 9.738123  | 5.515709  | -2.695930 |
| O  | 11.591473 | 6.162802  | -0.493296 |
| Ti | 11.093473 | 4.811712  | -1.668512 |
| O  | 12.709044 | 4.016778  | -2.197566 |
| Ti | 11.411770 | 5.896652  | 1.333998  |
| O  | 13.134424 | 5.587994  | 1.966368  |
| Ti | 13.307035 | 3.613417  | 1.851470  |
| Ti | 13.486272 | 2.806993  | -0.980309 |
| O  | 13.933406 | 1.851001  | 2.542360  |
| Ti | 12.660526 | 0.361265  | 1.965451  |
| O  | 12.689938 | -0.146050 | 0.090280  |
| O  | 14.027249 | 1.284668  | -1.893235 |
| Ti | 12.598864 | -0.024592 | -1.762656 |
| O  | 12.185832 | 2.380903  | 0.453972  |
| O  | 10.999745 | 1.060588  | 2.595175  |
| Ti | 10.024702 | 2.257151  | 1.139632  |
| O  | 14.504800 | 3.674483  | 0.308860  |
| O  | 9.693703  | 0.817766  | -0.215614 |
| O  | 11.265887 | 1.081635  | -2.599051 |
| Ti | 9.633557  | 1.605038  | -1.871601 |
| O  | 0.305514  | -1.254314 | 1.818566  |
| O  | 0.346580  | -1.232190 | -2.694215 |
| Ti | 1.654221  | 0.269654  | 1.480212  |
| O  | 1.624359  | 0.284818  | -0.421780 |
| Ti | 1.614689  | 0.221026  | -2.283184 |
| O  | -3.695832 | -8.023674 | 1.929652  |
| O  | -0.694986 | -7.268651 | -2.843686 |
| O  | -0.728900 | -8.190480 | 1.650686  |
| O  | -1.823572 | -4.662650 | 1.760713  |
| Ti | -2.006955 | -6.734302 | 1.758011  |
| O  | -2.122154 | -6.548344 | -0.196552 |
| O  | -1.713497 | -4.528090 | -2.599221 |
| Ti | -2.216747 | -6.346064 | -2.049340 |

|    |           |           |           |
|----|-----------|-----------|-----------|
| O  | -3.655435 | -7.345556 | -2.899152 |
| O  | 1.056910  | -4.248468 | 1.933099  |
| Ti | -0.416581 | -3.159206 | 1.464892  |
| O  | -0.273685 | -3.133024 | -0.435574 |
| O  | 1.216113  | -3.925406 | -3.034126 |
| Ti | -0.305631 | -3.084494 | -2.303751 |
| O  | 3.144289  | -0.658031 | -2.949402 |
| Ti | 4.657023  | -1.552947 | -2.312684 |
| O  | 4.705831  | -1.580550 | -0.453301 |
| O  | 3.196273  | -0.727026 | 1.816746  |
| Ti | 4.848541  | -1.542313 | 1.456037  |
| O  | 6.754508  | -2.701713 | 1.856552  |
| O  | 6.546053  | -2.653202 | -2.798039 |
| O  | 5.944097  | -0.102327 | -2.705518 |
| O  | 6.136925  | 0.045268  | 1.756227  |
| O  | 12.606238 | -1.594593 | 2.266277  |
| Ti | 11.283829 | -2.981465 | 1.733612  |
| O  | 11.474195 | -3.212944 | -0.154126 |
| O  | 12.401878 | -1.734100 | -2.478520 |
| Ti | 11.045129 | -3.005339 | -1.954142 |
| O  | 10.864502 | -4.893208 | 2.081538  |
| O  | 9.688889  | -2.014617 | 1.763380  |
| Ti | 8.035400  | -1.112466 | 1.480755  |
| O  | 7.655437  | -1.245408 | -0.378533 |
| O  | 9.499355  | -2.074221 | -2.432691 |
| Ti | 7.786306  | -1.275643 | -2.223178 |
| Ti | 2.752099  | -4.568093 | -2.170156 |
| O  | 2.824354  | -4.284341 | -0.338864 |
| Ti | 2.763678  | -4.890642 | 1.460645  |
| Ti | 0.956883  | -7.899249 | -2.320109 |
| O  | 1.965156  | -6.814750 | 1.513352  |
| O  | 2.394044  | -9.500863 | 1.803414  |
| O  | 0.694669  | -8.910044 | -0.765388 |
| Ti | 0.974576  | -8.449799 | 1.023991  |
| O  | 1.969275  | -6.370513 | -1.869741 |
| Ti | 7.248815  | -8.890241 | 1.284056  |
| O  | 7.570257  | -9.833306 | -0.318393 |
| Ti | 7.200940  | -8.328882 | -1.470298 |
| O  | 6.872360  | -7.320778 | 0.123743  |
| O  | 5.644460  | -8.425947 | -2.473325 |
| O  | 5.419244  | -9.188119 | 1.812357  |
| O  | 4.634438  | -6.172729 | 1.813893  |
| Ti | 3.951928  | -8.073792 | 1.542470  |
| O  | 3.690193  | -7.963924 | -0.349343 |
| O  | 4.500995  | -5.858651 | -2.667284 |
| Ti | 3.895383  | -7.663641 | -2.194647 |
| O  | 2.521653  | -8.599493 | -3.167362 |
| O  | 4.143188  | -3.381111 | -2.911261 |
| O  | 4.201011  | -3.477900 | 1.876384  |
| Ti | 9.424082  | -6.167998 | 1.624430  |
| O  | 9.844524  | -6.220918 | -0.223657 |
| O  | 10.630270 | -4.747395 | -2.596600 |

|    |            |           |           |
|----|------------|-----------|-----------|
| Ti | 9.291341   | -5.947136 | -1.982100 |
| O  | 8.727208   | -7.738565 | -2.382145 |
| O  | 8.936133   | -8.114165 | 1.961343  |
| O  | 7.861247   | -5.187351 | 1.748655  |
| Ti | 6.034689   | -4.688868 | 1.526853  |
| O  | 5.784414   | -4.461635 | -0.361920 |
| O  | 7.645260   | -5.172526 | -2.462244 |
| Ti | 5.899980   | -4.466750 | -2.200011 |
| Ti | -9.038580  | 5.804332  | -1.781642 |
| O  | -9.155791  | 5.808404  | 0.114676  |
| O  | -10.806508 | 5.095010  | 2.213922  |
| Ti | -9.155355  | 6.108643  | 1.984665  |
| O  | -8.450328  | 7.928053  | 2.496333  |
| O  | -8.585726  | 7.660805  | -1.882568 |
| O  | -7.455611  | 5.214811  | -2.572997 |
| Ti | -5.762136  | 4.459744  | -2.128127 |
| O  | -5.792423  | 4.519879  | -0.294284 |
| O  | -7.642755  | 5.132632  | 2.649344  |
| Ti | -5.862000  | 5.036525  | 1.579455  |
| O  | -4.108127  | 3.760597  | 1.906875  |
| O  | -4.014952  | 3.384010  | -2.800235 |
| Ti | -6.982793  | 8.058398  | -1.002604 |
| O  | -7.255183  | 9.414700  | 0.265422  |
| Ti | -6.682142  | 8.456405  | 1.815935  |
| O  | -6.487425  | 6.860117  | 0.560955  |
| O  | -5.064539  | 9.412742  | 2.067383  |
| O  | -5.531238  | 8.286628  | -2.096596 |
| O  | -4.331477  | 5.874568  | -2.485880 |
| Ti | -3.703452  | 7.656067  | -1.864237 |
| O  | -3.493149  | 7.945687  | -0.053611 |
| O  | -4.350656  | 6.423584  | 1.957732  |
| Ti | -3.440334  | 8.502791  | 1.842171  |
| O  | -1.886593  | 9.684241  | 1.781845  |
| O  | -1.641141  | 6.966746  | 1.771173  |
| O  | -1.791014  | 6.393185  | -1.760796 |
| O  | -2.415754  | 8.717637  | -2.846064 |
| O  | -0.301699  | 8.823695  | -0.641824 |
| Ti | -0.806686  | 7.936056  | -2.205154 |
| Ti | -0.564119  | 8.519728  | 1.182338  |
| Ti | -2.665959  | 5.135943  | 1.534327  |
| O  | -2.685424  | 4.388571  | -0.221109 |
| Ti | -2.639121  | 4.592471  | -2.063773 |
| O  | -10.491709 | 4.828194  | -2.445708 |
| O  | -1.096127  | 3.980740  | -2.950799 |
| Ti | 0.440435   | 3.157416  | -2.254488 |
| O  | 0.476547   | 3.281842  | -0.394134 |
| O  | -0.954878  | 4.455596  | 2.001185  |
| Ti | 0.502368   | 3.404292  | 1.526529  |
| O  | 1.050267   | 8.218618  | 2.018192  |
| O  | 0.763365   | 7.317250  | -2.965910 |
| O  | 1.859338   | 4.580944  | -2.631577 |
| Ti | 2.249380   | 6.434354  | -2.115245 |

|    |            |           |           |
|----|------------|-----------|-----------|
| O  | 2.167619   | 6.657678  | -0.278562 |
| O  | 1.941906   | 4.880721  | 1.744572  |
| Ti | 2.472919   | 6.983548  | 1.658380  |
| O  | 3.951221   | 8.272292  | 1.517040  |
| O  | 3.694943   | 7.433768  | -2.980052 |
| Ti | -10.992041 | 3.026818  | -1.979153 |
| O  | -11.489971 | 3.318066  | -0.200972 |
| O  | -12.680620 | 1.889990  | 2.042256  |
| Ti | -11.276057 | 3.237902  | 1.689135  |
| O  | -9.417608  | 2.147579  | -2.452459 |
| Ti | -7.750670  | 1.252385  | -2.195865 |
| O  | -7.770094  | 1.238591  | -0.335286 |
| O  | -9.628337  | 2.386848  | 1.734165  |
| Ti | -7.955664  | 1.507639  | 1.549811  |
| O  | -6.092056  | 0.301898  | 1.808624  |
| O  | -5.928247  | 0.197910  | -2.897318 |
| O  | -6.485524  | 2.680537  | -2.677907 |
| O  | -6.655279  | 3.036953  | 1.821289  |
| Ti | -4.753507  | 1.848642  | 1.458623  |
| O  | -4.706623  | 1.639739  | -0.443977 |
| Ti | -4.625555  | 1.540832  | -2.302511 |
| Ti | -13.627562 | -3.030973 | -1.492182 |
| Ti | -14.181037 | -3.393161 | 1.255816  |
| O  | -13.705540 | -1.406257 | -2.405320 |
| Ti | -12.666422 | 0.100395  | -1.805068 |
| O  | -13.559589 | 0.440678  | -0.204370 |
| O  | -14.365266 | -1.528737 | 1.908299  |
| Ti | -13.075596 | 0.007680  | 1.567795  |
| O  | -12.615993 | -2.896403 | 0.110077  |
| O  | -12.329752 | 1.797284  | -2.569623 |
| O  | -10.977344 | -0.699326 | -1.765455 |
| Ti | -9.398464  | -1.761845 | -1.710262 |
| O  | -15.127152 | -3.510175 | -0.390513 |
| O  | -8.751588  | -1.720874 | 0.037432  |
| O  | -11.385471 | -0.773212 | 1.496275  |
| Ti | -9.943190  | -1.988941 | 1.666581  |
| Ti | -11.257072 | -5.100094 | -1.799851 |
| O  | -12.910726 | -4.448584 | -2.496678 |
| O  | -10.838982 | -3.720785 | 1.921285  |
| O  | -9.887279  | -6.369531 | 1.898869  |
| O  | -11.642449 | -6.018110 | -0.240769 |
| Ti | -11.632560 | -5.419574 | 1.558849  |
| O  | -13.509412 | -5.107564 | 1.771891  |
| O  | -10.289482 | -3.494133 | -1.588222 |
| O  | -6.818299  | -5.931711 | -2.743998 |
| O  | -6.951556  | -6.843576 | 1.812220  |
| O  | -8.081132  | -3.231909 | 1.878365  |
| Ti | -8.108798  | -5.298318 | 1.818255  |
| O  | -8.138254  | -5.058907 | -0.121666 |
| O  | -7.811449  | -3.112004 | -2.537240 |
| Ti | -8.253005  | -4.919919 | -1.970469 |
| O  | -9.800544  | -5.892826 | -2.651597 |

|    |           |           |           |
|----|-----------|-----------|-----------|
| O  | -8.289337 | -0.586093 | -2.813053 |
| O  | -8.656015 | -0.373639 | 2.068363  |
| O  | -5.346296 | -2.654699 | 1.802399  |
| Ti | -6.859287 | -1.566856 | 1.313348  |
| O  | -6.216375 | -1.520531 | -0.543078 |
| O  | -4.922156 | -2.601826 | -3.074127 |
| Ti | -6.386909 | -1.663705 | -2.365902 |
| O  | -3.058713 | 0.692258  | -2.894323 |
| Ti | -1.499622 | -0.147480 | -2.267699 |
| O  | -1.488098 | -0.155132 | -0.404306 |
| O  | -3.154963 | 0.913745  | 1.797834  |
| Ti | -1.589068 | -0.050797 | 1.496847  |
| O  | -0.213835 | 1.321316  | -2.666503 |
| O  | -0.216907 | 1.473183  | 1.806271  |
| Ti | -3.410443 | -3.223522 | -2.128111 |
| O  | -3.338845 | -2.835492 | -0.328467 |
| Ti | -3.694301 | -3.435944 | 1.456797  |
| Ti | -5.178558 | -6.562178 | -2.123165 |
| O  | -4.395431 | -5.349543 | 1.570760  |
| O  | -5.459822 | -7.550559 | -0.560659 |
| Ti | -5.203052 | -7.047609 | 1.218433  |
| O  | -4.168827 | -5.032545 | -1.719856 |
| O  | -2.049607 | -1.987893 | -2.878392 |
| O  | -2.234918 | -1.983403 | 1.910883  |
| O  | 1.498687  | 0.594650  | 8.202368  |
| O  | 1.318088  | 0.476157  | 3.762877  |
| O  | 3.575772  | 4.027050  | 8.201285  |
| O  | 3.530692  | 3.774330  | 3.782720  |
| O  | 4.995262  | 5.509091  | 5.614126  |
| Ti | 4.834453  | 5.235527  | 3.746172  |
| Ti | 4.709511  | 5.462616  | 7.465490  |
| Ti | 2.834725  | 2.125803  | 7.924817  |
| O  | 2.741869  | 1.966430  | 6.053380  |
| Ti | 2.701464  | 1.905227  | 4.159502  |
| O  | 4.298333  | 1.056344  | 3.697752  |
| Ti | 5.910920  | 0.155565  | 4.102799  |
| O  | 5.753577  | 0.213509  | 5.992106  |
| O  | 4.598677  | 1.562424  | 8.454051  |
| Ti | 5.860765  | 0.198625  | 7.846155  |
| O  | 7.764311  | -0.918439 | 8.132369  |
| O  | 7.775120  | -0.954089 | 3.684312  |
| O  | 6.416627  | 5.242931  | 8.205572  |
| O  | 6.729436  | 4.893887  | 3.445885  |
| O  | 7.074209  | 1.861113  | 3.766759  |
| Ti | 7.913138  | 3.522358  | 4.356688  |
| O  | 7.786058  | 3.740242  | 6.164961  |
| O  | 7.196041  | 1.893710  | 8.154861  |
| Ti | 7.855437  | 4.016286  | 8.117596  |
| O  | 9.488188  | 5.125417  | 8.278655  |
| O  | 9.903850  | 2.503017  | 8.078444  |
| O  | 9.801343  | 2.449845  | 4.342074  |
| O  | 9.291677  | 4.926545  | 3.621365  |

|    |           |           |          |
|----|-----------|-----------|----------|
| O  | 11.114662 | 4.813320  | 5.833247 |
| Ti | 10.908225 | 3.973519  | 4.165913 |
| O  | 12.873111 | 3.605870  | 3.934799 |
| Ti | 10.868225 | 4.140625  | 7.550579 |
| O  | 12.623846 | 3.665467  | 8.119407 |
| Ti | 13.068251 | 1.950832  | 7.487962 |
| Ti | 13.413124 | 1.807789  | 4.687119 |
| O  | 13.150934 | 0.426784  | 8.607661 |
| Ti | 12.144373 | -1.317969 | 7.929034 |
| O  | 12.914301 | -1.629227 | 6.253922 |
| O  | 13.403216 | -0.013011 | 4.059900 |
| Ti | 12.246412 | -1.618332 | 4.467244 |
| O  | 11.917026 | 1.753329  | 5.951262 |
| O  | 10.538395 | -0.431715 | 7.883987 |
| Ti | 8.972372  | 0.721478  | 7.635529 |
| O  | 14.513616 | 2.007591  | 6.214428 |
| O  | 8.667680  | 0.692605  | 5.839974 |
| O  | 10.532341 | -0.944520 | 4.508320 |
| Ti | 9.309840  | 0.449080  | 4.003668 |
| O  | -0.645539 | -2.850570 | 8.169228 |
| O  | -0.700898 | -3.017531 | 3.796026 |
| Ti | 0.713628  | -1.329774 | 7.822536 |
| O  | 0.500660  | -1.154307 | 5.965188 |
| Ti | 0.617685  | -1.453765 | 4.105549 |
| O  | -5.067178 | -9.507867 | 8.382837 |
| O  | -2.126192 | -9.589163 | 3.774064 |
| O  | -2.155985 | -9.356468 | 8.182655 |
| O  | -2.790358 | -6.287083 | 8.114384 |
| Ti | -3.572001 | -8.168150 | 7.773083 |
| O  | -3.591715 | -8.141183 | 5.924402 |
| O  | -2.925245 | -6.405494 | 3.707055 |
| Ti | -3.680619 | -8.504142 | 4.001200 |
| O  | -5.253784 | -9.683955 | 3.879464 |
| O  | 0.243125  | -5.668481 | 8.151723 |
| Ti | -1.355467 | -4.774416 | 7.843727 |
| O  | -1.457630 | -4.878758 | 5.927498 |
| O  | -0.285280 | -6.141912 | 3.317614 |
| Ti | -1.555452 | -4.843435 | 4.085915 |
| O  | 2.197087  | -2.439076 | 3.917609 |
| Ti | 3.873325  | -3.283290 | 4.116894 |
| O  | 4.050338  | -3.416357 | 5.966771 |
| O  | 2.293898  | -2.297308 | 8.012730 |
| Ti | 3.917449  | -3.250779 | 7.851099 |
| O  | 5.826296  | -4.479269 | 8.153318 |
| O  | 5.755746  | -4.509264 | 3.748825 |
| O  | 5.184447  | -1.743016 | 3.729303 |
| O  | 5.169083  | -1.667766 | 8.158902 |
| O  | 11.690536 | -3.215866 | 8.264114 |
| Ti | 10.425349 | -4.666677 | 7.745476 |
| O  | 10.996754 | -5.001873 | 5.989071 |
| O  | 11.891215 | -3.433588 | 3.847526 |
| Ti | 10.409337 | -4.719513 | 4.229311 |

|    |            |            |          |
|----|------------|------------|----------|
| O  | 10.000518  | -6.573181  | 8.102395 |
| O  | 8.808785   | -3.746960  | 7.742197 |
| Ti | 7.088219   | -2.911313  | 7.723725 |
| O  | 6.801186   | -2.666042  | 5.896462 |
| O  | 8.808565   | -3.760549  | 4.169775 |
| Ti | 7.095084   | -2.935292  | 4.054629 |
| Ti | 1.535465   | -6.584610  | 3.926384 |
| O  | 1.652032   | -6.282833  | 5.782151 |
| Ti | 1.870511   | -6.511596  | 7.648048 |
| Ti | -0.378443  | -9.947637  | 4.322168 |
| O  | 0.936883   | -8.368317  | 7.949804 |
| O  | 1.280737   | -11.038325 | 8.137868 |
| O  | -0.598522  | -10.403752 | 6.121480 |
| Ti | -0.361469  | -9.829167  | 7.885803 |
| O  | 0.823175   | -8.434898  | 4.126431 |
| Ti | 6.202959   | -10.365714 | 7.283582 |
| O  | 6.501303   | -11.518525 | 5.827384 |
| Ti | 5.940738   | -10.234668 | 4.484230 |
| O  | 5.689973   | -9.034897  | 5.980205 |
| O  | 4.278778   | -10.758827 | 3.862449 |
| O  | 4.403552   | -10.770475 | 8.109688 |
| O  | 3.577786   | -7.885458  | 8.095523 |
| Ti | 2.770502   | -9.710824  | 7.644899 |
| O  | 2.623444   | -9.649100  | 5.830753 |
| O  | 3.446347   | -7.830199  | 3.627688 |
| Ti | 2.551374   | -9.893237  | 3.869598 |
| O  | 0.991143   | -11.050004 | 3.650540 |
| O  | 3.058532   | -5.192296  | 3.668078 |
| O  | 3.265300   | -5.163950  | 8.207899 |
| Ti | 8.598841   | -7.792461  | 7.494393 |
| O  | 8.975686   | -8.320720  | 5.705027 |
| O  | 9.722960   | -6.516655  | 3.757667 |
| Ti | 8.325376   | -7.900626  | 4.016600 |
| O  | 7.410889   | -9.668553  | 3.366434 |
| O  | 7.924562   | -9.646545  | 7.885657 |
| O  | 7.099089   | -6.740788  | 7.484463 |
| Ti | 5.184454   | -6.482308  | 7.893204 |
| O  | 4.642597   | -6.349471  | 6.024451 |
| O  | 6.651186   | -7.068541  | 3.878735 |
| Ti | 4.851687   | -6.389279  | 4.205997 |
| Ti | -10.492935 | 4.706188   | 4.439051 |
| O  | -10.871361 | 5.232632   | 6.228094 |
| O  | -11.619448 | 3.430384   | 8.177617 |
| Ti | -10.221765 | 4.813567   | 7.917655 |
| O  | -9.309696  | 6.581695   | 8.566440 |
| O  | -9.821313  | 6.559876   | 4.043465 |
| O  | -8.994093  | 3.652578   | 4.448352 |
| Ti | -7.080104  | 3.395283   | 4.038485 |
| O  | -6.537640  | 3.264634   | 5.906808 |
| O  | -8.548138  | 3.980116   | 8.053174 |
| Ti | -6.749857  | 3.299002   | 7.725775 |
| O  | -4.954612  | 2.107731   | 8.261629 |

|    |            |           |          |
|----|------------|-----------|----------|
| O  | -5.158900  | 2.075411  | 3.721310 |
| Ti | -8.100408  | 7.281552  | 4.645132 |
| O  | -8.404835  | 8.435840  | 6.098817 |
| Ti | -7.846757  | 7.152289  | 7.443923 |
| O  | -7.592956  | 5.950973  | 5.949771 |
| O  | -6.187886  | 7.678987  | 8.069926 |
| O  | -6.298980  | 7.686165  | 3.820117 |
| O  | -5.473771  | 4.797747  | 3.835581 |
| Ti | -4.667259  | 6.624420  | 4.287323 |
| O  | -4.537223  | 6.564952  | 6.100294 |
| O  | -5.348836  | 4.744542  | 8.305782 |
| Ti | -4.465915  | 6.805281  | 8.064439 |
| O  | -2.914650  | 7.974851  | 8.279377 |
| O  | -2.731400  | 5.356734  | 7.766777 |
| O  | -2.835437  | 5.278005  | 3.988988 |
| O  | -3.173187  | 7.945334  | 3.793825 |
| O  | -1.303997  | 7.333755  | 5.808766 |
| Ti | -1.530519  | 6.732211  | 4.052611 |
| Ti | -1.543640  | 6.880616  | 7.606887 |
| Ti | -3.436273  | 3.508652  | 8.004350 |
| O  | -3.550838  | 3.183754  | 6.150056 |
| Ti | -3.769876  | 3.423943  | 4.288842 |
| O  | -11.894000 | 3.485695  | 3.830034 |
| O  | -2.144538  | 2.579226  | 3.777164 |
| Ti | -0.551333  | 1.679618  | 4.086890 |
| O  | -0.432443  | 1.771947  | 6.000178 |
| O  | -1.619428  | 3.057743  | 8.612358 |
| Ti | -0.345026  | 1.751510  | 7.845077 |
| O  | 0.213259   | 6.557669  | 8.157661 |
| O  | 0.266300   | 6.236959  | 3.793155 |
| O  | 0.882456   | 3.194102  | 3.819221 |
| Ti | 1.692635   | 5.061246  | 4.188541 |
| O  | 1.749425   | 5.018440  | 6.041473 |
| O  | 1.001025   | 3.329325  | 8.188761 |
| Ti | 1.741650   | 5.449947  | 7.954969 |
| O  | 3.333018   | 6.623701  | 7.948458 |
| O  | 3.192682   | 6.383079  | 3.552438 |
| Ti | -12.316248 | 1.579208  | 4.190412 |
| O  | -12.890783 | 1.914317  | 5.945261 |
| O  | -13.778313 | 0.340796  | 8.084521 |
| Ti | -12.300066 | 1.631404  | 7.704667 |
| O  | -10.696248 | 0.662052  | 4.197582 |
| Ti | -8.978597  | -0.173092 | 4.213470 |
| O  | -8.686924  | -0.439817 | 6.036757 |
| O  | -10.695879 | 0.677600  | 7.757040 |
| Ti | -8.986127  | -0.155281 | 7.876845 |
| O  | -7.071171  | -1.349209 | 8.198943 |
| O  | -7.048807  | -1.426508 | 3.764717 |
| O  | -7.717980  | 1.391864  | 3.782354 |
| O  | -7.650282  | 1.420317  | 8.181961 |
| Ti | -5.762856  | 0.195912  | 7.813752 |
| O  | -5.947662  | 0.331477  | 5.963413 |



|    |            |           |          |
|----|------------|-----------|----------|
| Ti | -5.805576  | 0.164246  | 4.081200 |
| Ti | -14.961736 | -5.042410 | 4.453662 |
| Ti | -15.296572 | -4.905009 | 7.253842 |
| O  | -15.030559 | -3.527806 | 3.324082 |
| Ti | -14.024135 | -1.780393 | 4.008071 |
| O  | -14.795806 | -1.469462 | 5.681173 |
| O  | -15.288608 | -3.081388 | 7.873869 |
| Ti | -14.126626 | -1.477193 | 7.468789 |
| O  | -13.803240 | -4.849750 | 5.980882 |
| O  | -13.569815 | 0.117616  | 3.670758 |
| O  | -12.418034 | -2.664659 | 4.060308 |
| Ti | -10.848083 | -3.813090 | 4.309152 |
| O  | -16.402481 | -5.102508 | 5.727914 |
| O  | -10.536971 | -3.774694 | 6.100881 |
| O  | -12.415536 | -2.155817 | 7.432730 |
| Ti | -11.190494 | -3.550587 | 7.939498 |
| Ti | -12.760608 | -7.235039 | 4.388150 |
| O  | -14.512271 | -6.753730 | 3.815405 |
| O  | -11.691111 | -5.544961 | 7.583926 |
| O  | -11.164418 | -8.020371 | 8.310647 |
| O  | -12.997689 | -7.913533 | 6.101593 |
| Ti | -12.787813 | -7.070152 | 7.771470 |
| O  | -14.754010 | -6.702698 | 7.999790 |
| O  | -11.772097 | -5.602047 | 3.864851 |
| O  | -8.335771  | -8.336147 | 3.716854 |
| O  | -8.580374  | -7.950771 | 8.497727 |
| O  | -8.999539  | -4.922987 | 8.173225 |
| Ti | -9.790083  | -6.612758 | 7.590055 |
| O  | -9.658282  | -6.828777 | 5.781579 |
| O  | -9.066390  | -4.978296 | 3.801866 |
| Ti | -9.743817  | -7.095432 | 3.830033 |
| O  | -11.381023 | -8.197875 | 3.634586 |
| O  | -9.644948  | -2.169731 | 3.812276 |
| O  | -9.662264  | -2.131891 | 8.251113 |
| O  | -6.227100  | -4.202680 | 8.250579 |
| Ti | -7.798520  | -3.243522 | 7.827616 |
| O  | -7.592978  | -3.310658 | 5.933822 |
| O  | -6.505241  | -4.671907 | 3.391495 |
| Ti | -7.748442  | -3.282362 | 4.088989 |
| O  | -4.186619  | -0.795126 | 3.918938 |
| Ti | -2.610218  | -1.769200 | 4.107887 |
| O  | -2.379175  | -1.933081 | 5.963874 |
| O  | -4.089331  | -0.651135 | 8.007030 |
| Ti | -2.514757  | -1.647331 | 7.825685 |
| O  | -1.250839  | -0.246642 | 3.757859 |
| O  | -1.194499  | -0.078654 | 8.133289 |
| Ti | -4.750817  | -5.209900 | 4.032718 |
| O  | -4.595926  | -4.884605 | 5.888870 |
| Ti | -4.610277  | -5.011193 | 7.768968 |
| Ti | -6.629410  | -8.572486 | 4.470256 |
| O  | -5.445510  | -6.899539 | 8.097906 |
| O  | -6.947459  | -8.815601 | 6.319207 |

|    |           |           |           |
|----|-----------|-----------|-----------|
| Ti | -6.713677 | -8.395669 | 8.127821  |
| O  | -5.495688 | -7.051018 | 4.183497  |
| O  | -3.386896 | -3.689223 | 3.707253  |
| O  | -3.215924 | -3.572134 | 8.183563  |
| O  | 0.167663  | -1.101530 | 14.802531 |
| O  | 0.338059  | -1.113446 | 10.015794 |
| O  | 2.253583  | 1.955670  | 13.614702 |
| O  | 2.500202  | 2.231147  | 10.329005 |
| O  | 3.527976  | 4.468062  | 12.334493 |
| Ti | 3.325934  | 3.941781  | 10.539170 |
| Ti | 3.271963  | 3.515273  | 13.910239 |
| Ti | 1.527195  | 0.145739  | 14.056769 |
| O  | 1.450463  | -0.269976 | 12.260465 |
| Ti | 1.796925  | 0.326402  | 10.475574 |
| O  | 3.448630  | -0.455812 | 10.128097 |
| Ti | 4.970443  | -1.525064 | 10.623917 |
| O  | 4.342255  | -1.556505 | 12.480809 |
| O  | 3.042155  | -0.466546 | 15.004581 |
| Ti | 4.506626  | -1.412812 | 14.305169 |
| O  | 6.401665  | -2.502436 | 14.752915 |
| O  | 6.764644  | -2.716486 | 9.875869  |
| O  | 4.916003  | 2.891675  | 14.558356 |
| O  | 5.177096  | 3.665653  | 10.221750 |
| O  | 6.179887  | 0.133987  | 10.052432 |
| Ti | 6.325476  | 2.185309  | 10.159493 |
| O  | 6.408704  | 1.909315  | 12.085772 |
| O  | 5.934869  | 0.034345  | 14.484294 |
| Ti | 6.384165  | 1.840926  | 13.936366 |
| O  | 7.938442  | 2.775639  | 14.641104 |
| O  | 8.492783  | 0.347336  | 13.630281 |
| O  | 8.942723  | 0.631494  | 10.033625 |
| O  | 8.083000  | 3.309993  | 10.036908 |
| O  | 9.777405  | 2.894757  | 12.210458 |
| Ti | 9.784067  | 2.308285  | 10.408194 |
| O  | 11.653801 | 2.007578  | 10.156084 |
| Ti | 9.402598  | 1.989434  | 13.783016 |
| O  | 11.084356 | 1.366276  | 14.444584 |
| Ti | 11.760801 | -0.061991 | 13.431414 |
| Ti | 12.318990 | 0.288502  | 10.681573 |
| O  | 11.820755 | -1.691500 | 14.335769 |
| Ti | 10.785160 | -3.202843 | 13.737942 |
| O  | 11.681377 | -3.537189 | 12.137264 |
| O  | 12.491248 | -1.574331 | 10.028423 |
| Ti | 11.194019 | -3.104540 | 10.367617 |
| O  | 10.746076 | -0.173953 | 11.821785 |
| O  | 9.092738  | -2.426398 | 13.681039 |
| Ti | 7.525943  | -1.332818 | 13.657311 |
| O  | 13.266893 | 0.394751  | 12.324338 |
| O  | 6.880988  | -1.353088 | 11.908426 |
| O  | 9.507075  | -2.315129 | 10.430036 |
| Ti | 8.057173  | -1.108905 | 10.273743 |
| O  | -1.676129 | -4.408949 | 14.602439 |

|    |           |            |           |
|----|-----------|------------|-----------|
| O  | -1.680289 | -4.569392  | 10.129455 |
| Ti | -0.388507 | -2.940498  | 14.200143 |
| O  | -0.404901 | -2.942390  | 12.335801 |
| Ti | -0.310499 | -3.045984  | 10.435858 |
| O  | -5.586280 | -10.529765 | 14.906688 |
| O  | -2.938517 | -11.332936 | 9.933530  |
| O  | -2.652484 | -10.405452 | 14.901330 |
| O  | -3.746328 | -7.671397  | 14.571439 |
| Ti | -4.139394 | -9.523122  | 14.050899 |
| O  | -4.050617 | -9.745251  | 12.213830 |
| O  | -3.836897 | -7.976498  | 10.174472 |
| Ti | -4.355076 | -10.087684 | 10.282343 |
| O  | -5.836500 | -11.372228 | 10.428880 |
| O  | -0.790697 | -7.068393  | 14.888346 |
| Ti | -2.329127 | -6.246370  | 14.194827 |
| O  | -2.365695 | -6.376761  | 12.333034 |
| O  | -0.940716 | -7.541790  | 9.935017  |
| Ti | -2.401525 | -6.496655  | 10.415831 |
| O  | 1.259297  | -4.003970  | 10.129423 |
| Ti | 2.858994  | -4.936345  | 10.469976 |
| O  | 2.813079  | -4.727739  | 12.372481 |
| O  | 1.168388  | -3.782539  | 14.828840 |
| Ti | 2.736033  | -4.625216  | 14.231382 |
| O  | 4.595113  | -5.764210  | 14.609737 |
| O  | 4.760828  | -6.125997  | 10.111169 |
| O  | 4.200053  | -3.391604  | 10.124116 |
| O  | 4.036745  | -3.277041  | 14.819425 |
| O  | 10.453693 | -4.900726  | 14.507260 |
| Ti | 9.105489  | -6.115962  | 13.913930 |
| O  | 9.596749  | -6.406903  | 12.134331 |
| O  | 10.792744 | -4.983652  | 9.893111  |
| Ti | 9.383411  | -6.326307  | 10.244679 |
| O  | 8.603852  | -7.916586  | 14.378350 |
| O  | 7.529760  | -5.235814  | 14.385260 |
| Ti | 5.862428  | -4.338401  | 14.128316 |
| O  | 5.878803  | -4.324215  | 12.268391 |
| O  | 7.736164  | -5.474858  | 10.197753 |
| Ti | 6.061736  | -4.599948  | 10.383575 |
| Ti | 0.769834  | -8.226509  | 10.398707 |
| O  | 0.793834  | -7.478067  | 12.155344 |
| Ti | 0.749915  | -7.679554  | 13.997749 |
| Ti | -1.318236 | -11.619864 | 10.759902 |
| O  | -0.097228 | -9.481596  | 13.695780 |
| O  | 0.530178  | -11.802775 | 14.785367 |
| O  | -1.579505 | -11.921457 | 12.584628 |
| Ti | -1.080561 | -11.024795 | 14.144168 |
| O  | -0.245414 | -10.062363 | 10.171523 |
| Ti | 5.093362  | -11.146325 | 12.933855 |
| O  | 5.365039  | -12.503063 | 11.666058 |
| Ti | 4.793213  | -11.544825 | 10.115562 |
| O  | 4.596503  | -9.948752  | 11.369390 |
| O  | 3.177415  | -12.502153 | 9.861153  |

|    |            |            |           |
|----|------------|------------|-----------|
| O  | 3.643570   | -11.375022 | 14.029517 |
| O  | 2.443733   | -8.961129  | 14.418173 |
| Ti | 1.814736   | -10.743204 | 13.798640 |
| O  | 1.607966   | -11.038633 | 11.988707 |
| O  | 2.457204   | -9.513238  | 9.973299  |
| Ti | 1.553057   | -11.594181 | 10.092532 |
| O  | 0.004801   | -12.781483 | 10.155200 |
| O  | 2.212750   | -6.850044  | 10.023812 |
| O  | 2.126226   | -6.470585  | 14.730005 |
| Ti | 7.149638   | -8.891493  | 13.713112 |
| O  | 7.264081   | -8.898430  | 11.815914 |
| O  | 8.911282   | -8.182315  | 9.717351  |
| Ti | 7.260765   | -9.194964  | 9.945639  |
| O  | 6.558652   | -11.015602 | 9.432126  |
| O  | 6.695997   | -10.747931 | 13.814231 |
| O  | 5.567385   | -8.298727  | 14.502512 |
| Ti | 3.872766   | -7.544853  | 14.059381 |
| O  | 3.900815   | -7.608997  | 12.225595 |
| O  | 5.748694   | -8.220297  | 9.281372  |
| Ti | 3.967269   | -8.125722  | 10.351997 |
| Ti | -11.318644 | 3.080152   | 10.311017 |
| O  | -11.735414 | 3.134169   | 12.158642 |
| O  | -12.520130 | 1.655952   | 14.528893 |
| Ti | -11.179322 | 2.856495   | 13.917070 |
| O  | -10.610468 | 4.646296   | 14.318474 |
| O  | -10.829107 | 5.026189   | 9.974627  |
| O  | -9.756734  | 2.099091   | 10.185219 |
| Ti | -7.929194  | 1.602306   | 10.406261 |
| O  | -7.677332  | 1.370873   | 12.293738 |
| O  | -9.533176  | 2.081510   | 14.394089 |
| Ti | -7.786675  | 1.375420   | 14.132538 |
| O  | -6.030843  | 0.290263   | 14.842065 |
| O  | -6.093760  | 0.391368   | 10.050627 |
| Ti | -9.141669  | 5.802890   | 10.651517 |
| O  | -9.459317  | 6.741632   | 12.255615 |
| Ti | -9.085116  | 5.236288   | 13.404951 |
| O  | -8.758821  | 4.230655   | 11.807470 |
| O  | -7.526738  | 5.333209   | 14.403801 |
| O  | -7.314630  | 6.102943   | 10.121730 |
| O  | -6.532519  | 3.085418   | 10.119779 |
| Ti | -5.851477  | 4.983347   | 10.394755 |
| O  | -5.568385  | 4.886012   | 12.284936 |
| O  | -6.387882  | 2.766862   | 14.597476 |
| Ti | -5.776735  | 4.569992   | 14.128848 |
| O  | -4.406957  | 5.495066   | 15.115197 |
| O  | -3.858300  | 3.279200   | 13.792073 |
| O  | -3.870135  | 3.729685   | 10.417309 |
| O  | -4.295736  | 6.415416   | 10.127672 |
| O  | -2.579291  | 5.819280   | 12.717435 |
| Ti | -2.887290  | 5.368250   | 10.930688 |
| Ti | -2.839128  | 4.796919   | 14.267335 |
| Ti | -4.637601  | 1.475119   | 14.097514 |

|    |            |           |           |
|----|------------|-----------|-----------|
| O  | -4.717362  | 1.192059  | 12.265767 |
| Ti | -4.655151  | 1.803052  | 10.468235 |
| O  | -12.760246 | 1.807304  | 9.851554  |
| O  | -2.950762  | 1.158072  | 9.994874  |
| Ti | -1.476280  | 0.069365  | 10.462545 |
| O  | -1.610143  | 0.044718  | 12.362559 |
| O  | -3.101592  | 0.835433  | 14.959837 |
| Ti | -1.575816  | -0.002348 | 14.232495 |
| O  | -1.195699  | 4.164955  | 14.799244 |
| O  | -1.212617  | 5.125408  | 10.245076 |
| O  | -0.062418  | 1.567393  | 10.150788 |
| Ti | 0.072731   | 3.657249  | 10.162046 |
| O  | 0.137261   | 3.428815  | 12.111343 |
| O  | -0.172662  | 1.436619  | 14.540372 |
| Ti | 0.313281   | 3.255186  | 13.956563 |
| O  | 1.762643   | 4.303030  | 14.716256 |
| O  | 1.701990   | 4.946627  | 10.014659 |
| Ti | -13.178196 | -0.104293 | 10.201814 |
| O  | -13.369084 | 0.124424  | 12.089476 |
| O  | -14.289060 | -1.363136 | 14.408763 |
| Ti | -12.936506 | -0.084934 | 13.889279 |
| O  | -11.579540 | -1.061545 | 10.169915 |
| Ti | -9.927253  | -1.965011 | 10.455030 |
| O  | -9.550418  | -1.836768 | 12.315627 |
| O  | -11.390909 | -1.012161 | 14.373567 |
| Ti | -9.678545  | -1.813120 | 14.161332 |
| O  | -7.837373  | -2.983318 | 14.648814 |
| O  | -8.031536  | -3.120060 | 10.178916 |
| O  | -8.643880  | -0.381892 | 10.074642 |
| O  | -8.434854  | -0.434189 | 14.733436 |
| Ti | -6.546468  | -1.537161 | 14.247983 |
| O  | -6.597623  | -1.509337 | 12.387528 |
| Ti | -6.737770  | -1.541977 | 10.478483 |
| Ti | -15.193012 | -6.709829 | 10.084099 |
| Ti | -15.379024 | -5.908158 | 12.916632 |
| O  | -15.819866 | -4.947537 | 9.393615  |
| Ti | -14.550060 | -3.451525 | 9.969643  |
| O  | -14.582381 | -2.954294 | 11.843541 |
| O  | -15.914644 | -4.383888 | 13.829017 |
| Ti | -14.485138 | -3.074772 | 13.698116 |
| O  | -14.074277 | -5.485564 | 11.487546 |
| O  | -14.495495 | -1.495937 | 9.668062  |
| O  | -12.892739 | -4.158748 | 9.339039  |
| Ti | -11.919806 | -5.347941 | 10.804337 |
| O  | -16.396315 | -6.771120 | 11.623084 |
| O  | -11.605751 | -3.911292 | 12.165188 |
| O  | -13.159267 | -4.181393 | 14.549268 |
| Ti | -11.526469 | -4.698284 | 13.819367 |
| Ti | -13.289142 | -8.988885 | 10.603489 |
| O  | -15.013136 | -8.682647 | 9.970238  |
| O  | -12.056305 | -6.492785 | 12.722612 |
| O  | -11.624639 | -8.611856 | 14.631231 |

|    |            |            |           |
|----|------------|------------|-----------|
| O  | -13.474048 | -9.258818  | 12.429203 |
| Ti | -12.981873 | -7.907924  | 13.608116 |
| O  | -14.601287 | -7.118949  | 14.133315 |
| O  | -13.000543 | -7.055130  | 10.000907 |
| O  | -8.789629  | -10.133518 | 9.891407  |
| O  | -8.656763  | -8.932613  | 14.842212 |
| O  | -10.001913 | -6.140606  | 14.302566 |
| Ti | -9.958264  | -8.025006  | 13.834196 |
| O  | -9.823419  | -8.372339  | 12.025349 |
| O  | -10.297389 | -6.479071  | 10.356025 |
| Ti | -10.031805 | -8.622683  | 10.037532 |
| O  | -11.710369 | -9.717464  | 10.118609 |
| O  | -10.536279 | -3.933301  | 9.973494  |
| O  | -10.221653 | -3.654220  | 14.822244 |
| O  | -7.046764  | -5.814948  | 14.895160 |
| Ti | -8.440031  | -4.779423  | 14.192750 |
| O  | -8.526064  | -4.874400  | 12.333973 |
| O  | -7.342198  | -6.290690  | 10.022078 |
| Ti | -8.707557  | -5.070898  | 10.424783 |
| O  | -5.092418  | -2.364751  | 10.108752 |
| Ti | -3.552545  | -3.366767  | 10.448178 |
| O  | -3.518067  | -3.378710  | 12.350588 |
| O  | -5.032160  | -2.430869  | 14.879956 |
| Ti | -3.502081  | -3.309953  | 14.212205 |
| O  | -2.200461  | -1.838134  | 10.113947 |
| O  | -2.234038  | -1.855451  | 14.619665 |
| Ti | -5.560127  | -6.760813  | 10.540946 |
| O  | -5.488707  | -5.971430  | 12.261701 |
| Ti | -5.447278  | -6.405023  | 14.063613 |
| Ti | -7.281477  | -10.346949 | 10.921372 |
| O  | -6.113605  | -8.249380  | 13.620615 |
| O  | -7.664550  | -10.757285 | 12.715440 |
| Ti | -7.097816  | -9.746345  | 14.161209 |
| O  | -6.390209  | -8.664758  | 10.499661 |
| O  | -4.230880  | -5.288436  | 10.046054 |
| O  | -4.110873  | -5.153640  | 14.779500 |
